# Supplementary material for: Global impacts of chromosomal imbalance on gene expression in Arabidopsis and other taxa
Source: PubMed Central journal article supplement — Proc Natl Acad Sci U S A. 2018 Nov 14;115(48):E11321–30. doi: 10.1073/pnas.1807796115 (PMC6275517; doi:10.1073/pnas.1807796115), 2018-11-14
Supplement: pnas.1807796115.sapp.pdf [file pnas.1807796115.sapp.pdf]

Fig. S1. Combined ratio distributions of cis and trans for the five trisomics. Ratio distributions were generated as described in Fig. 1. The cis and trans distributions from Fig. 1 were overlaid.

# Trisomy 1

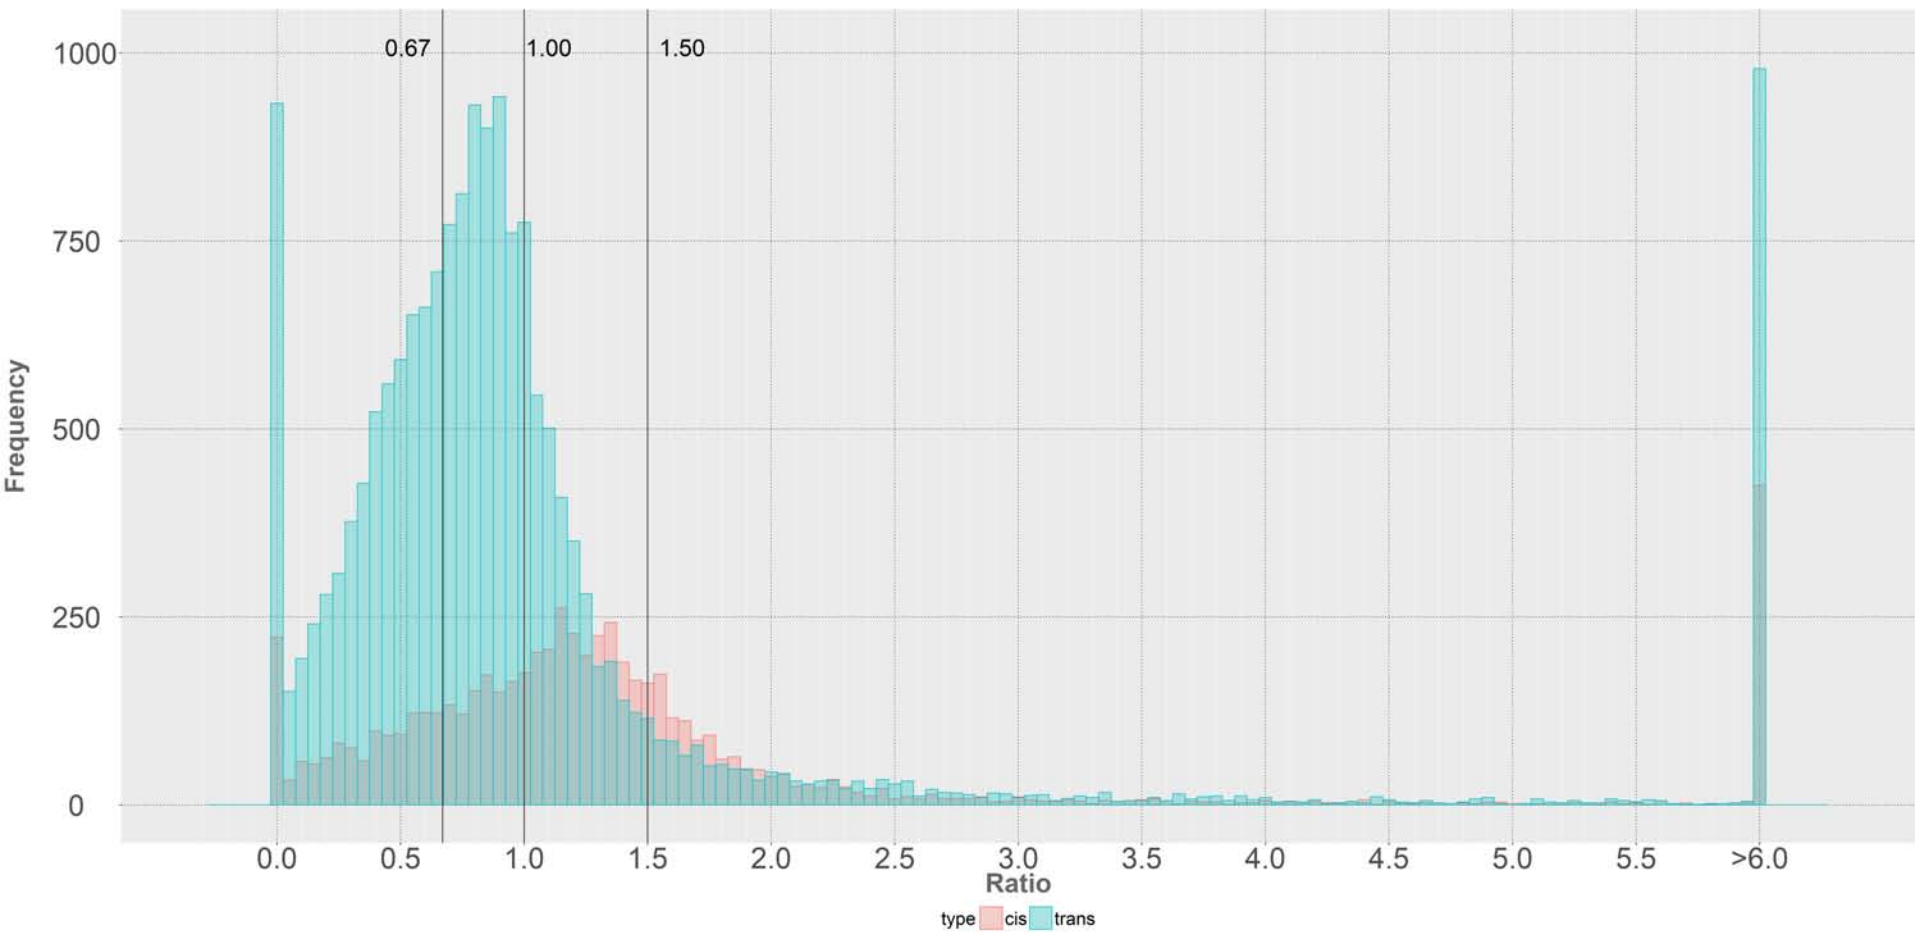

# Trisomy 2

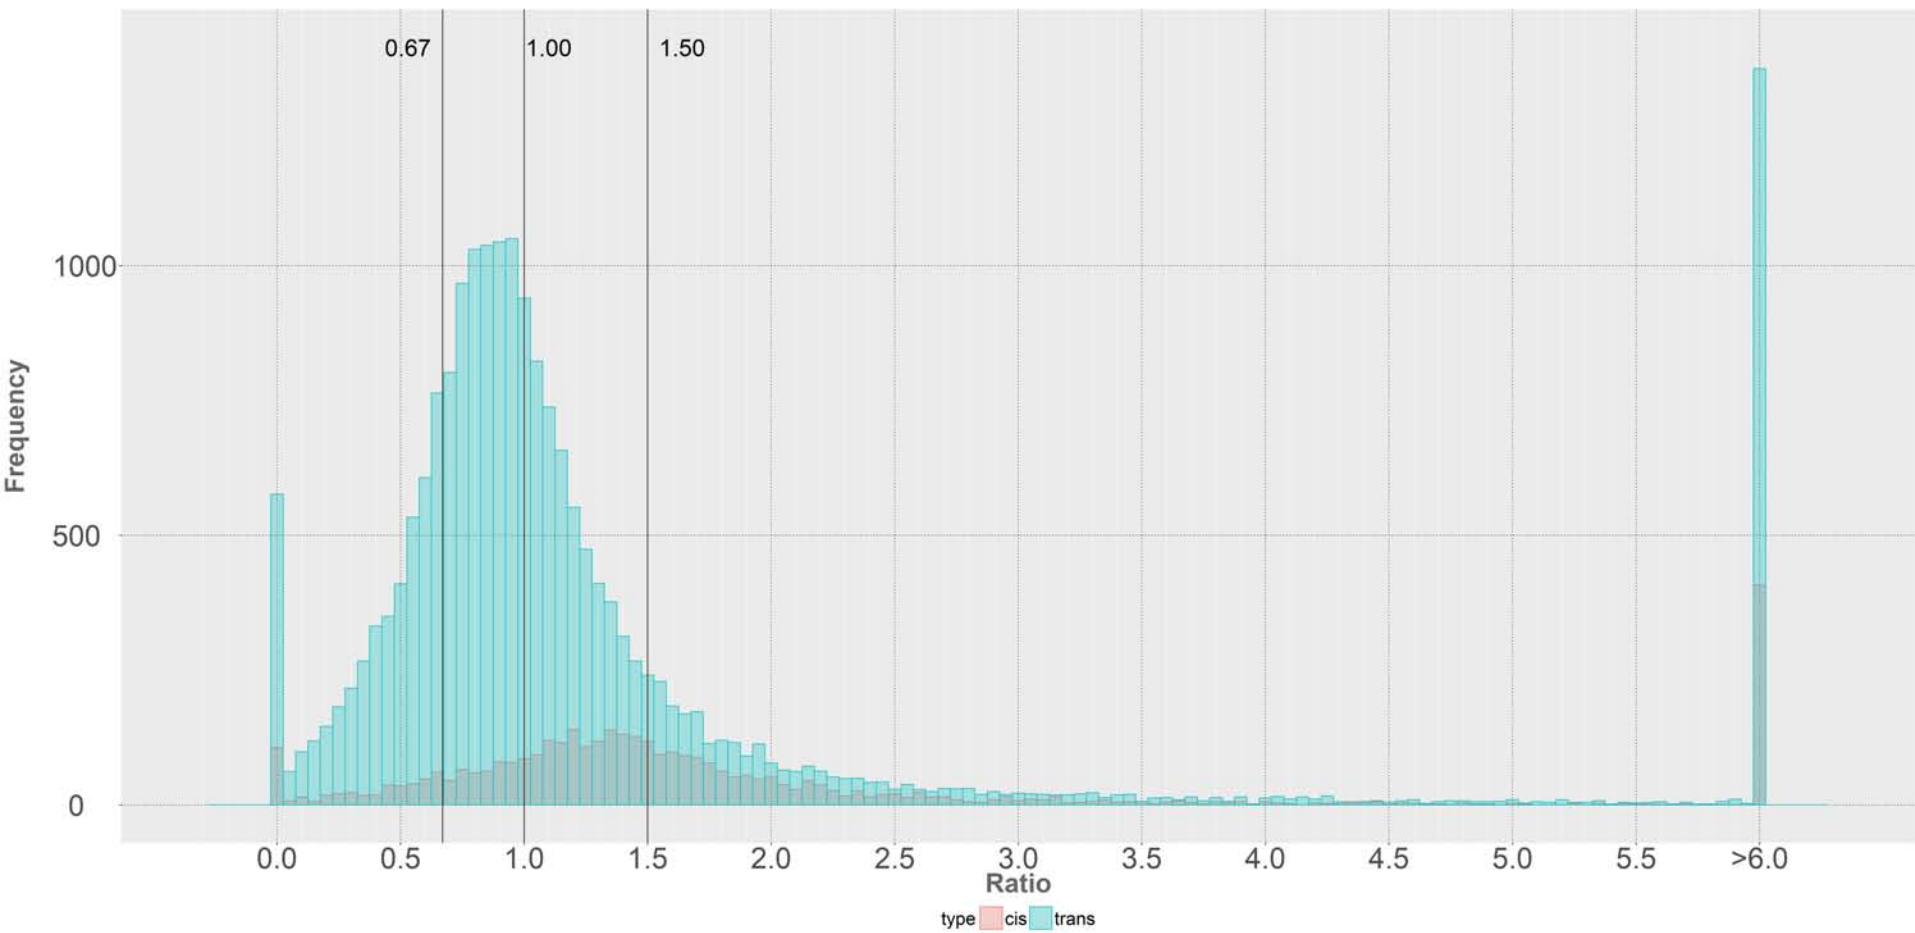

# Trisomy 3

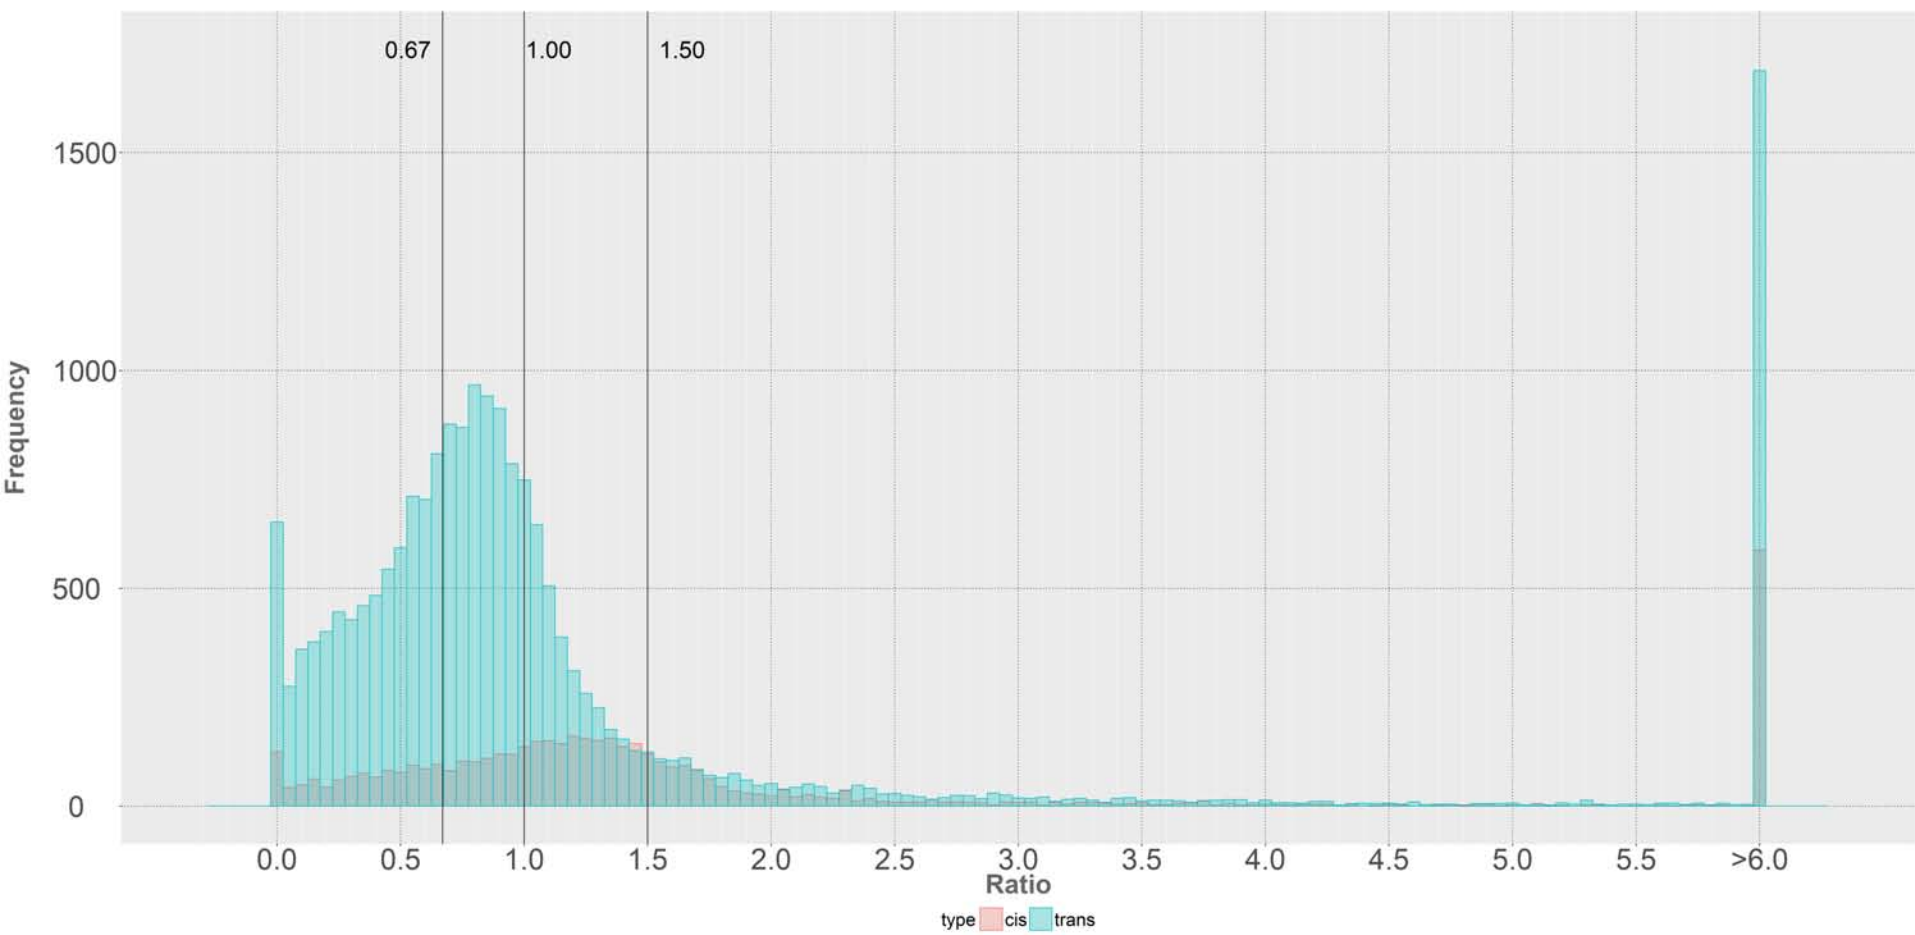

# Trisomy 4

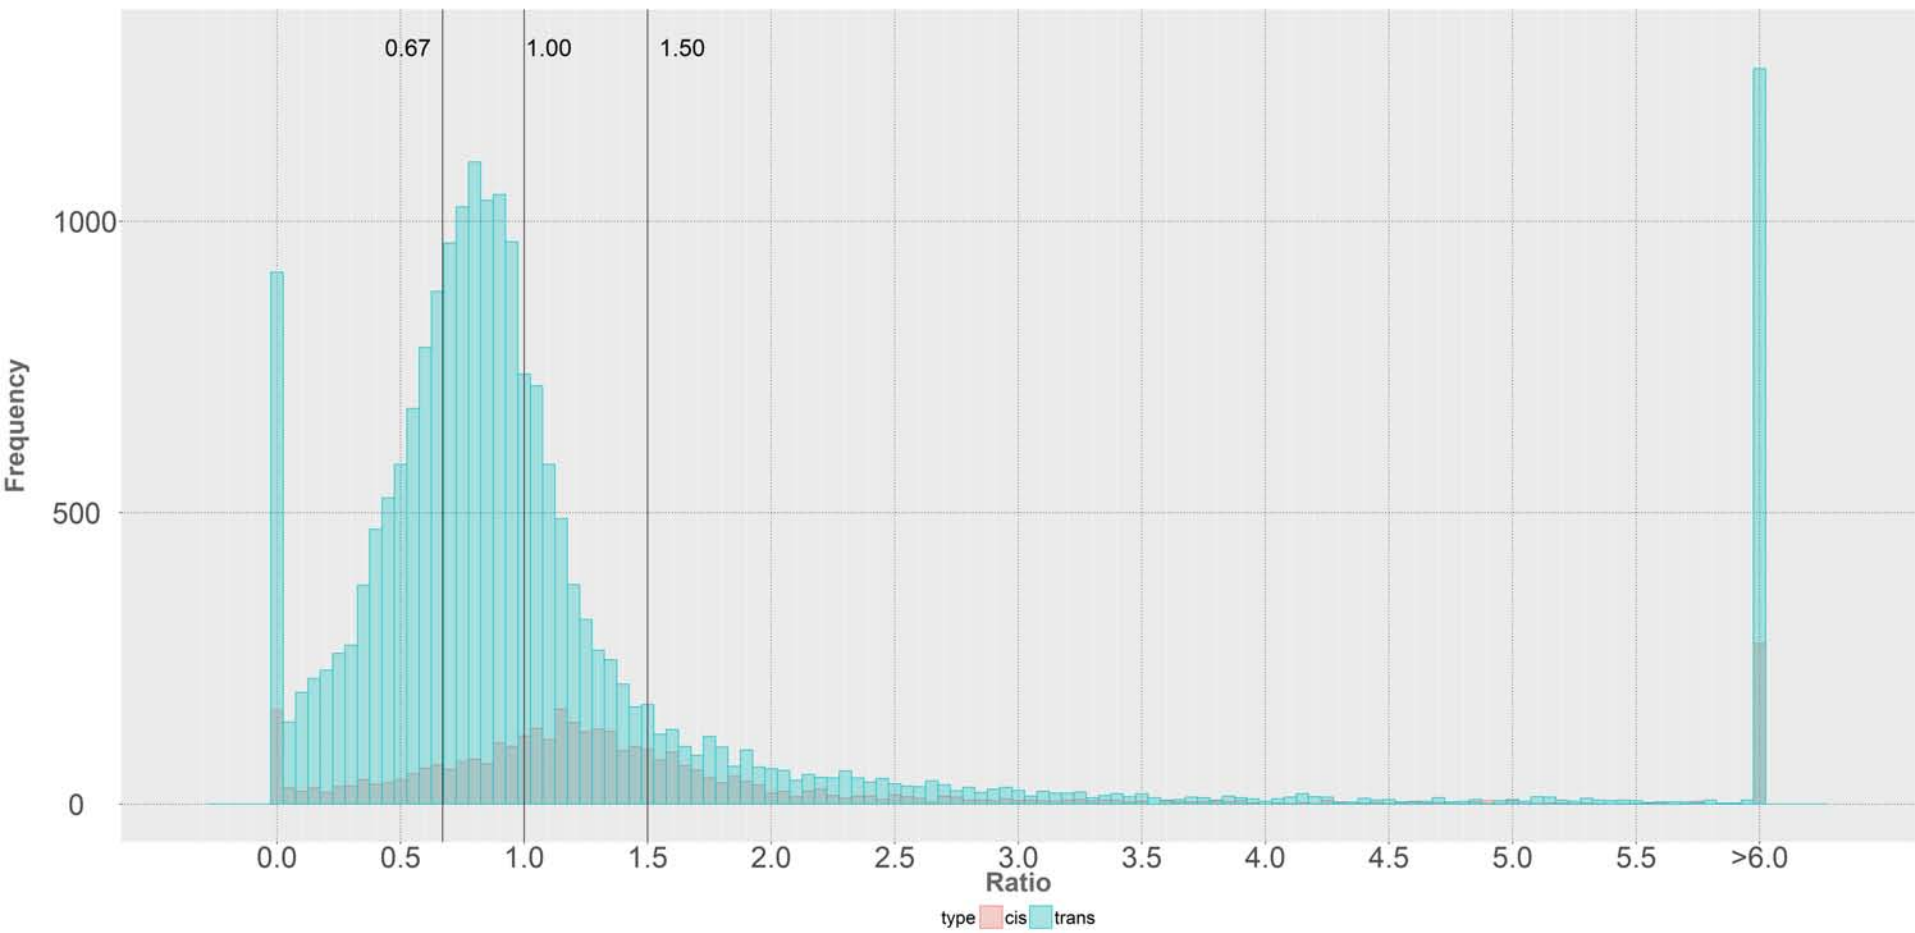

# Trisomy 5

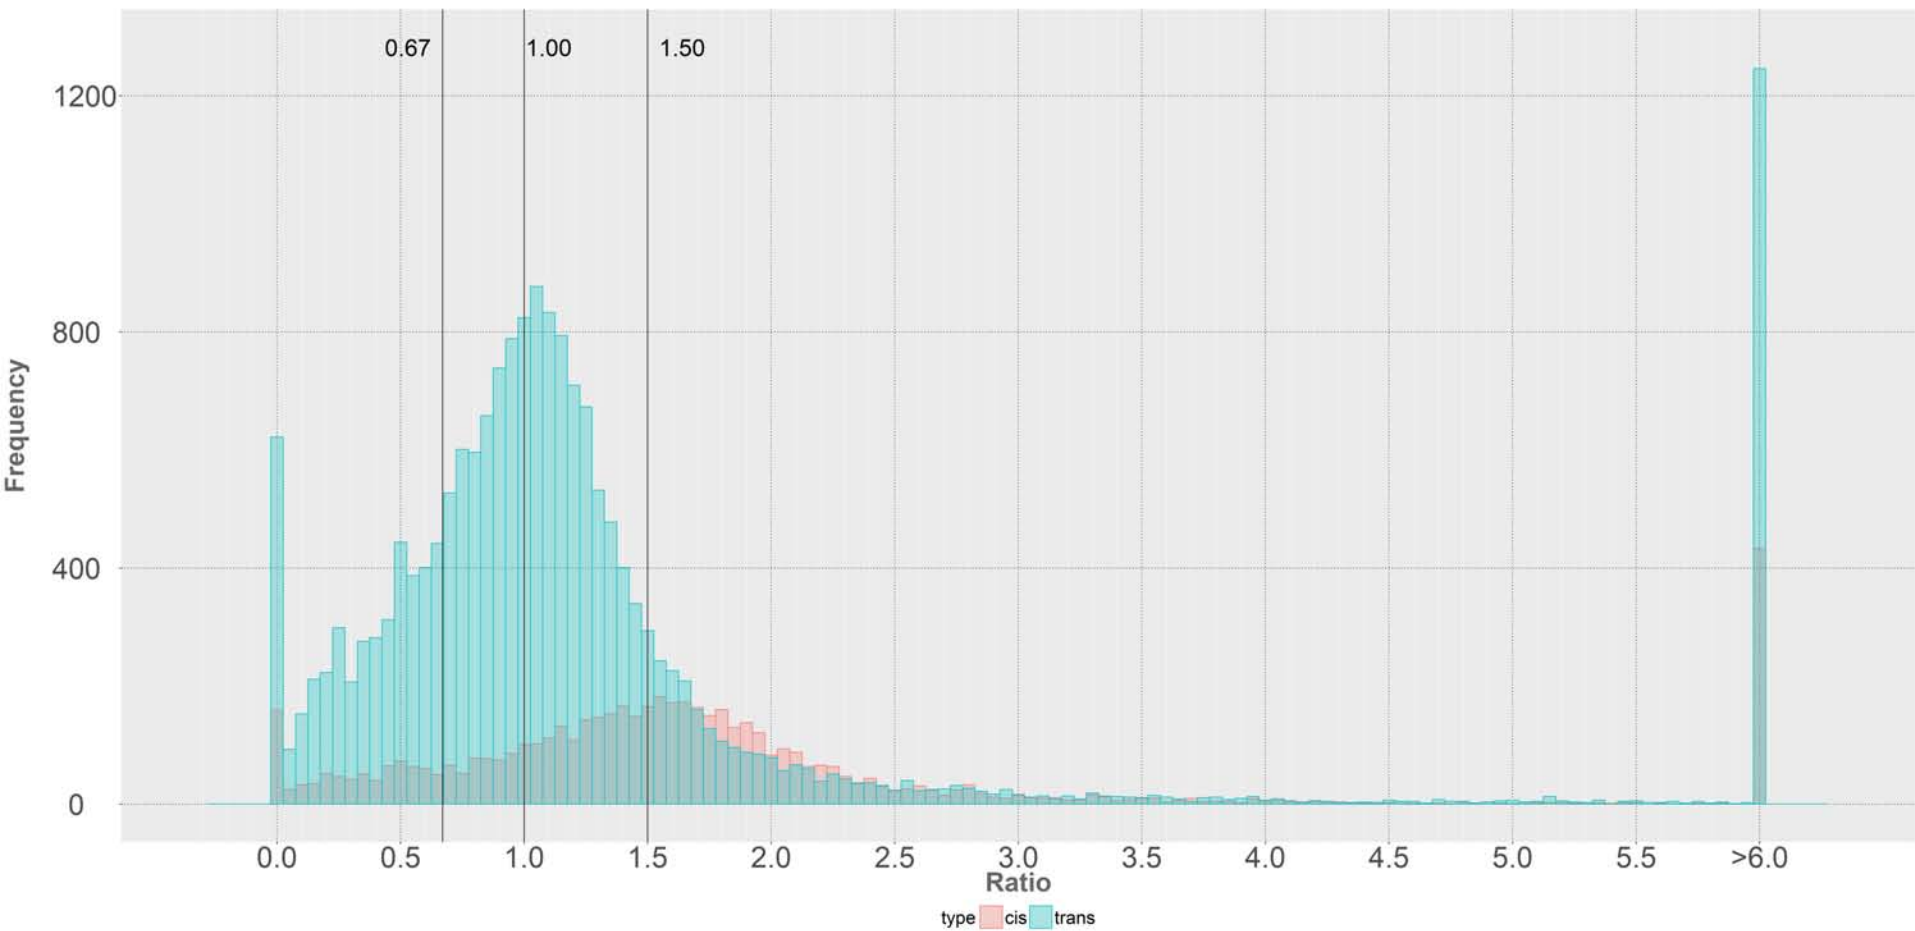

Fig. S2. Scatter plots of significant ratios for each gene in comparing trisomic and ploidy to diploid. Scatter plots were generated as described in Materials and Methods. The X-axis represents log<sub>2</sub> ratios of the treatment to the control and the Y-axis shows the sum of normalized counts of the treatment group. Data points with a p-value (Student's t-test) < 0.05 and a corresponding ratio of treatment to control > 1.0 were depicted in red, while points with a p-value < 0.05 and a corresponding ratio of treatment to control > 1.0 were depicted in green. Otherwise they were designated in black. For the respective trisomics, genes were partitioned into those encoded on the varied chromosome (cis) and those in the remainder of the genome (trans). Vertical dashed lines represent the designated ratio values. As a complement to ratio distributions, this type of analysis illustrates both the magnitude of deviation from the diploid and the magnitude of expression difference.

*cis*

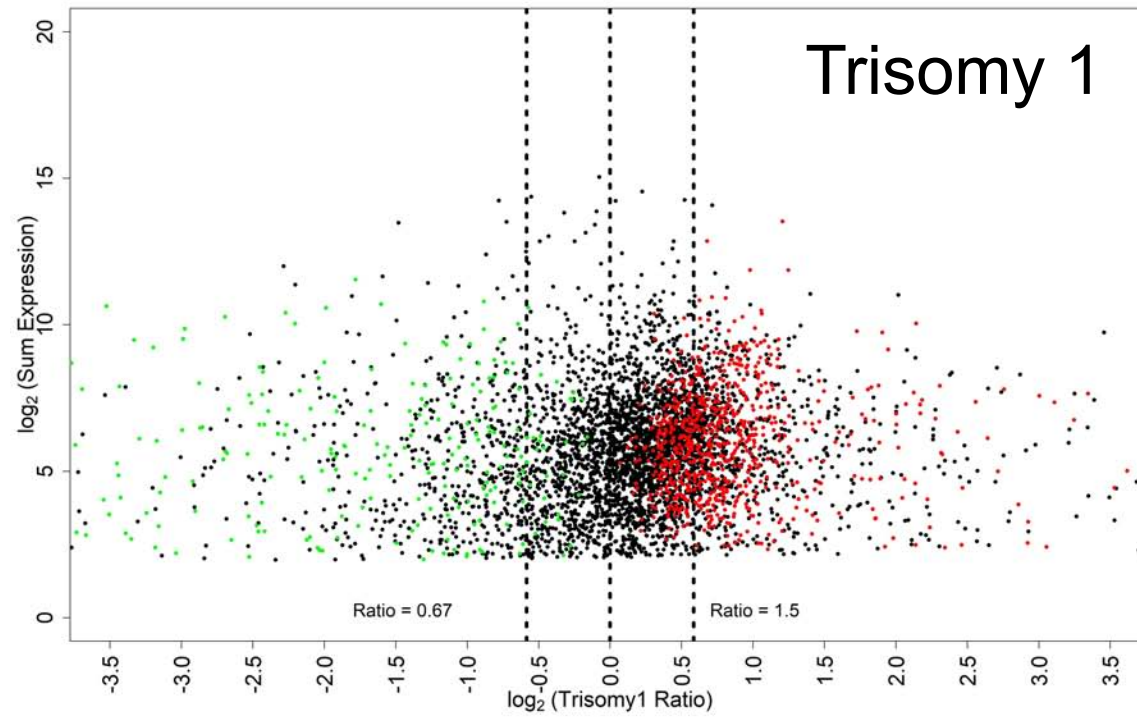

*trans*

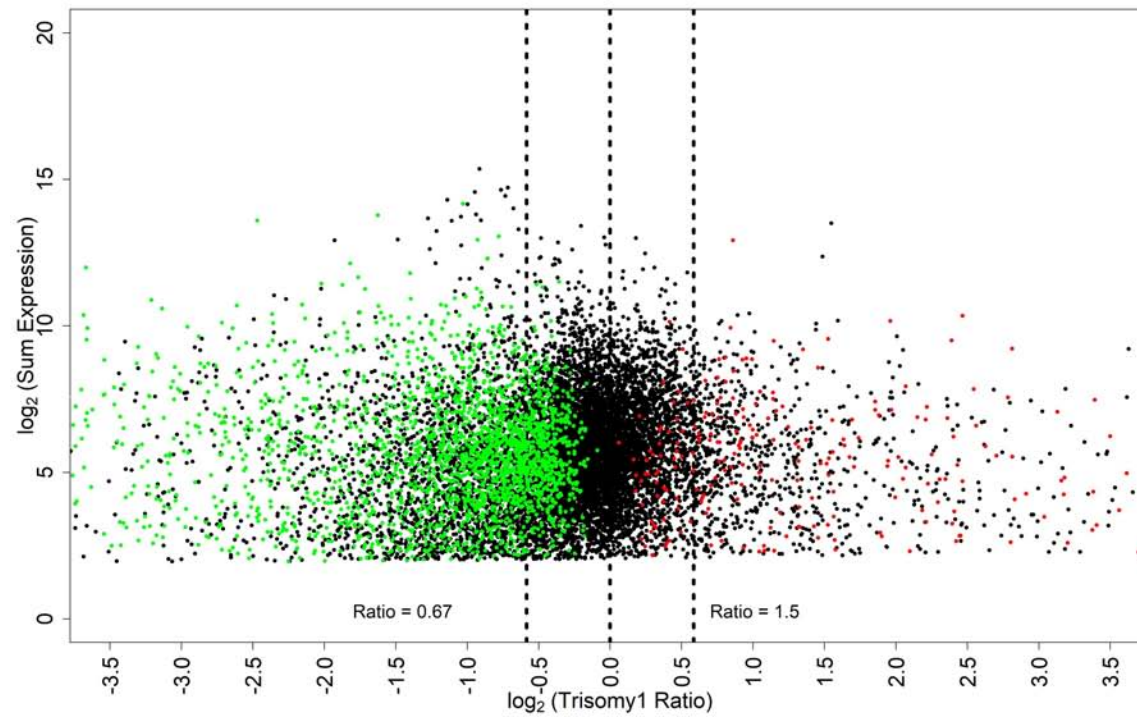



*cis*

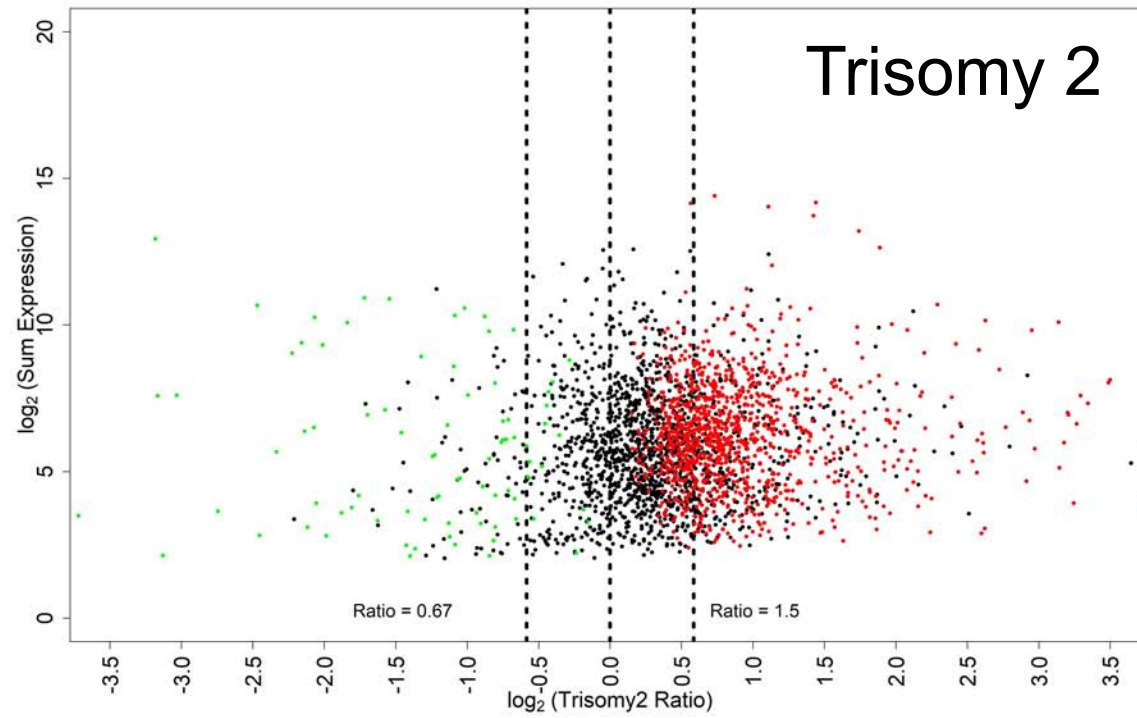

*trans*

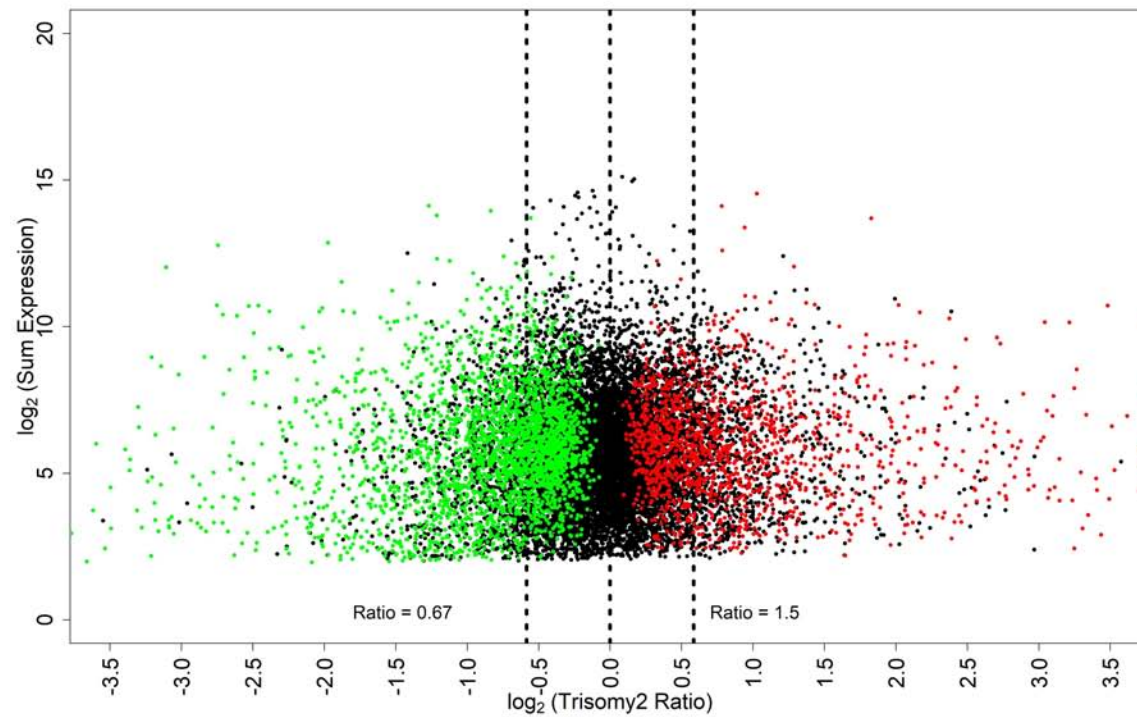

*cis*

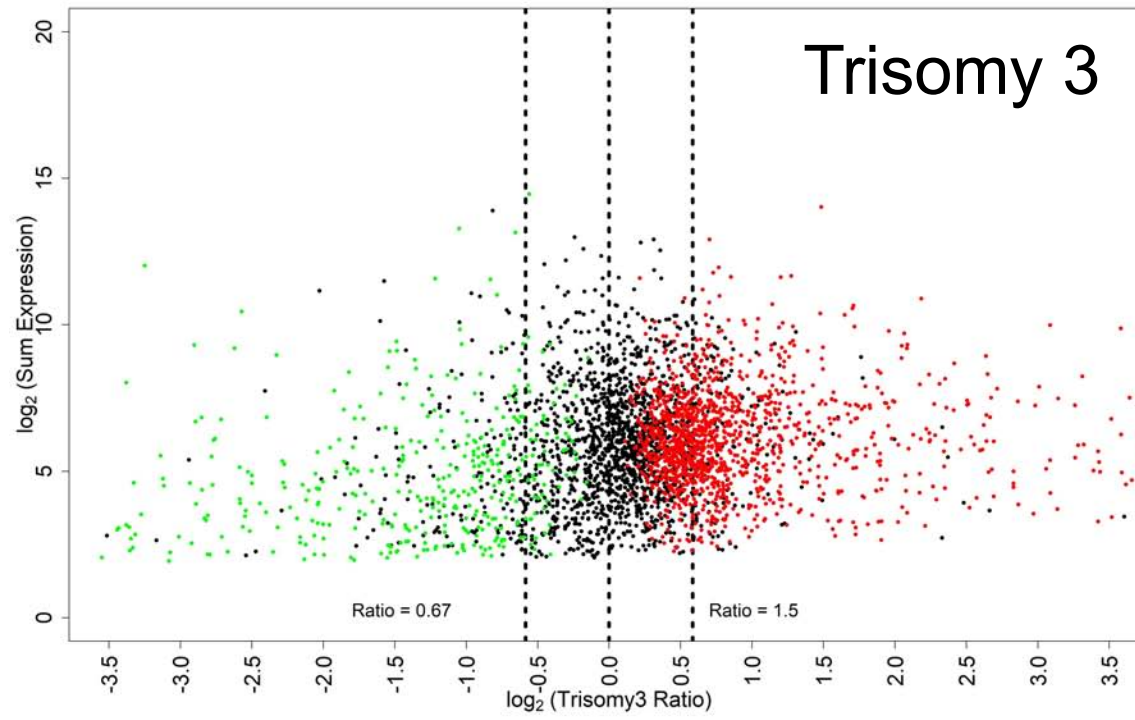

*trans*

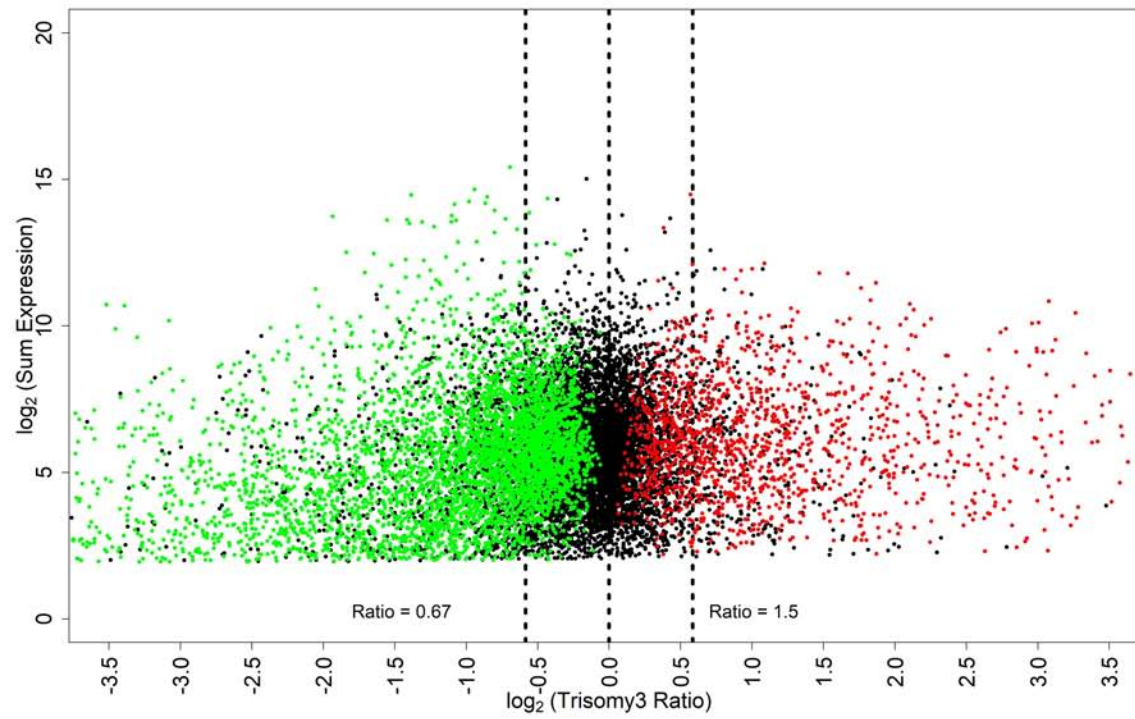

*cis*

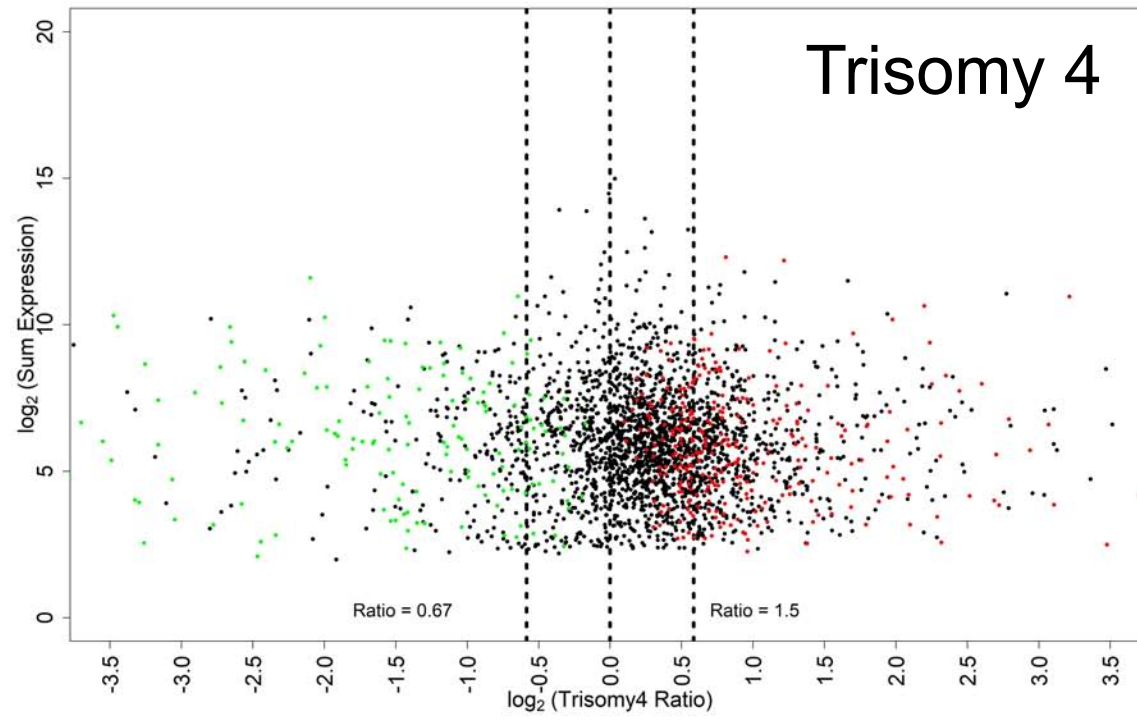

*trans*

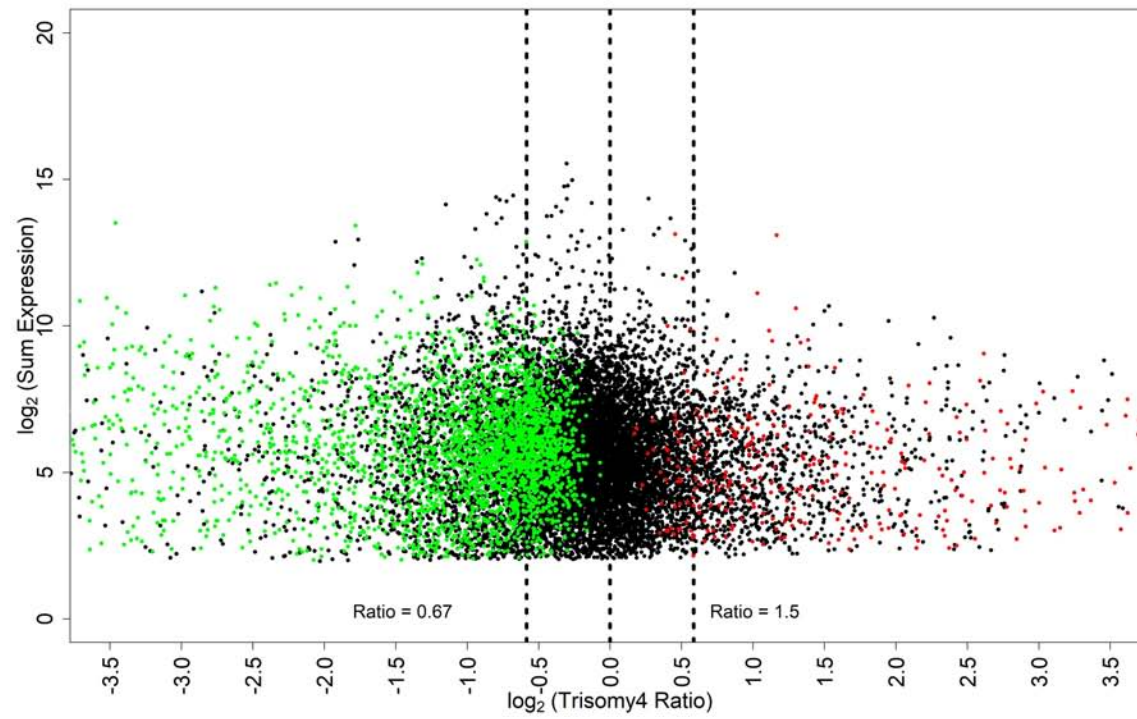

*cis*

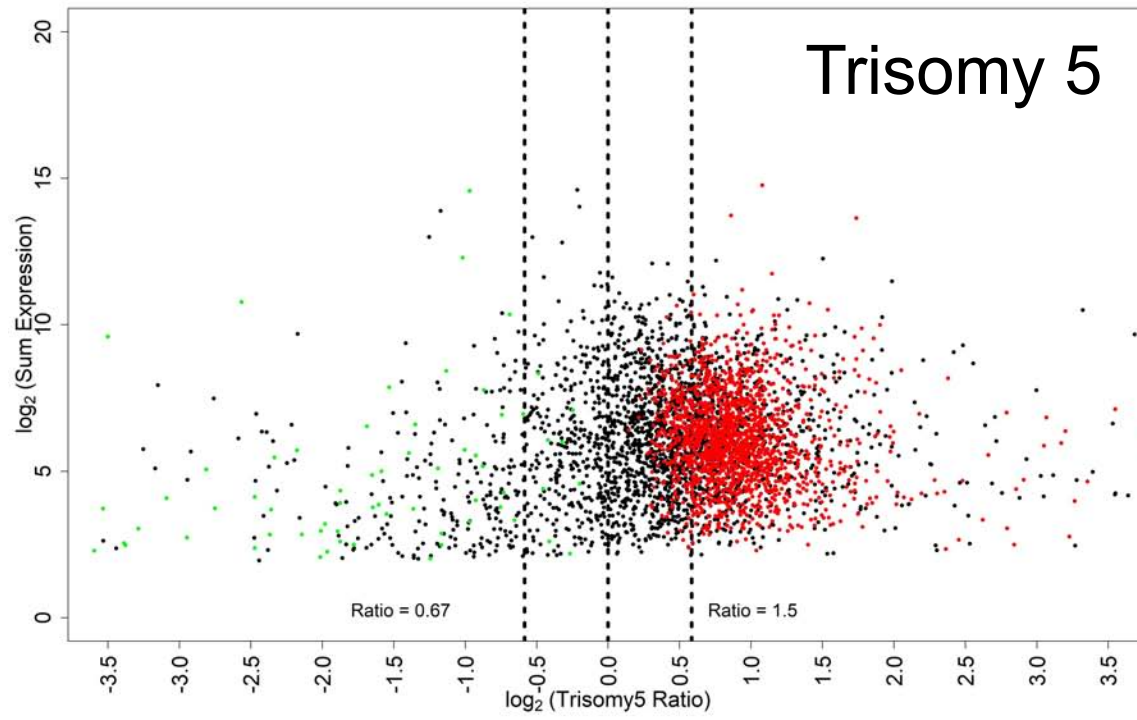

*trans*

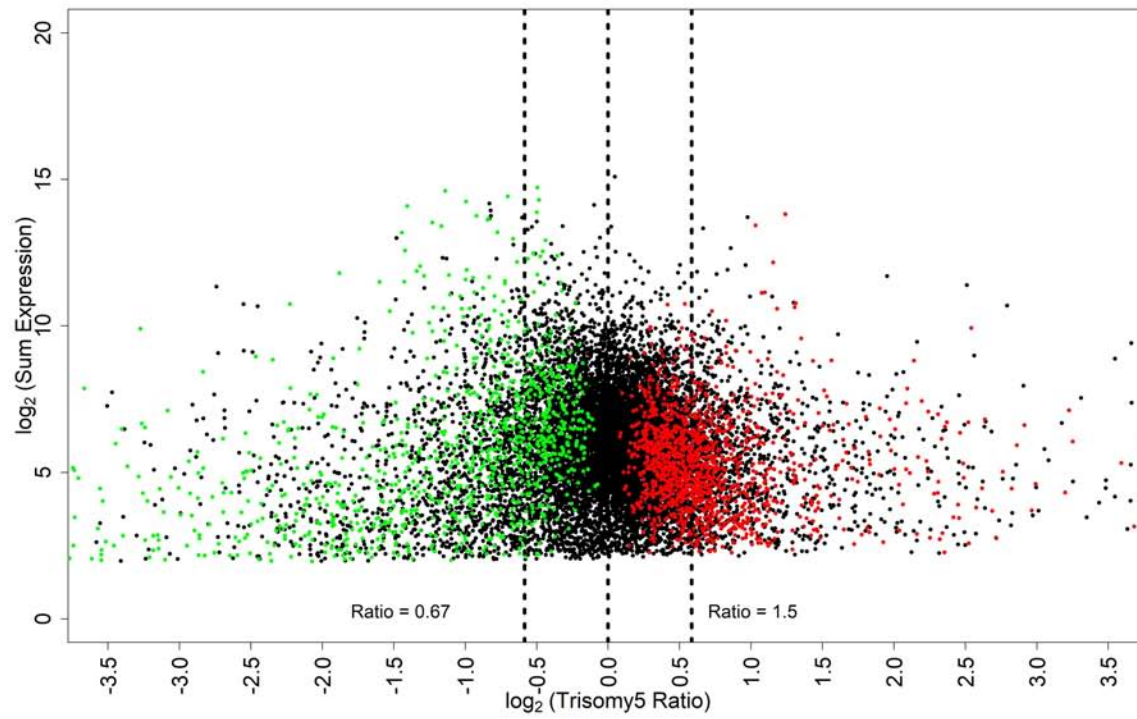

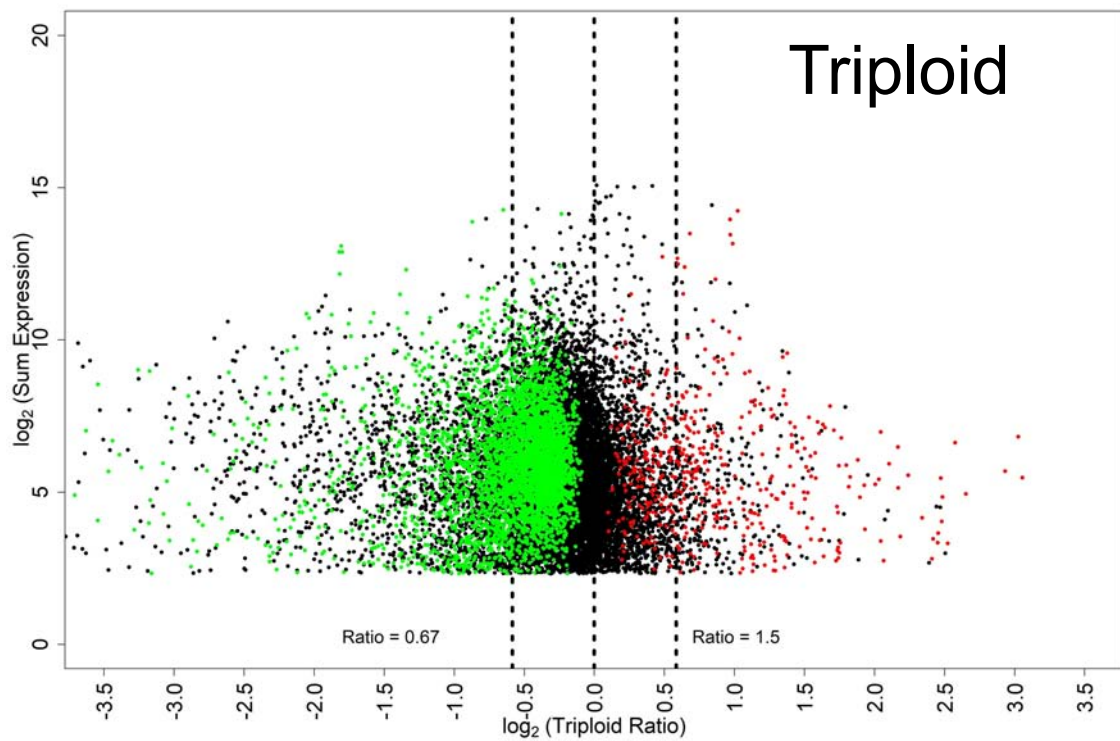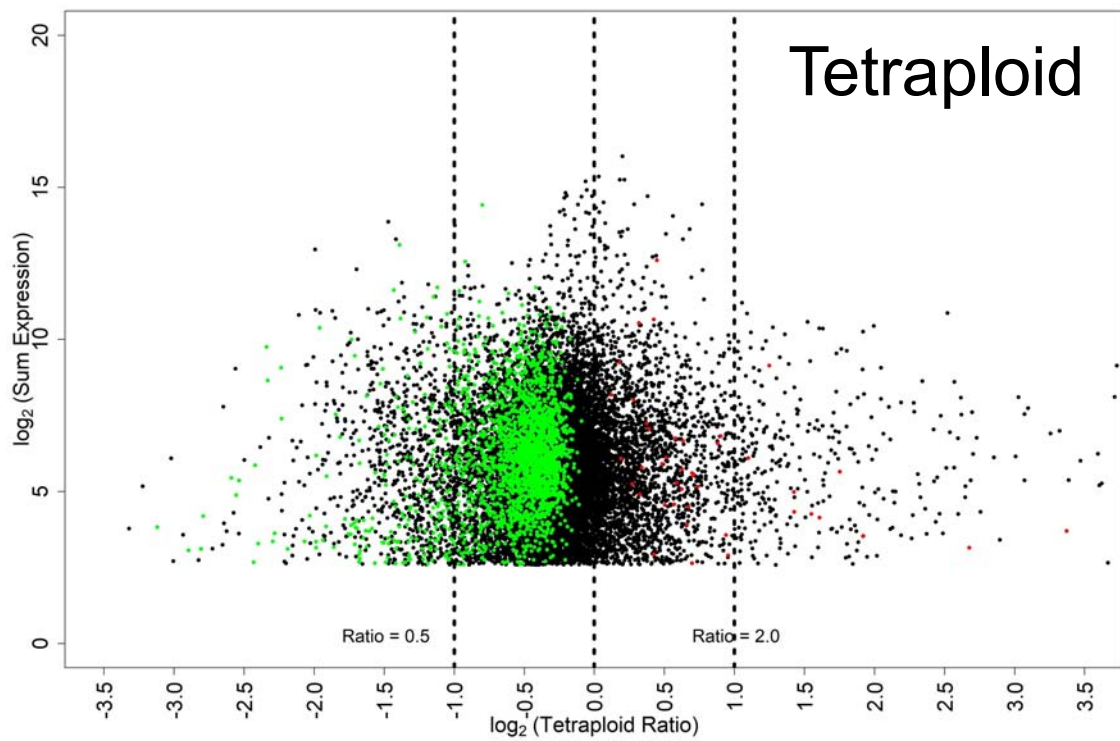

Fig. S3. Quantitative RT-PCR of selected relative expression levels in selected trisomics. The graphs show RNA accumulation levels (relative to two ERCC spike-in controls) for selected genes in plants trisomic, respectively, for chromosome 1 (top), 2 (middle) and 5 (bottom) (red bars) compared to diploid plants (blue bars). 'Cis' refers to expression levels of selected genes on the triplicated chromosome; 'Trans' refers to expression levels of selected genes on a non-triplicated chromosome. For cis effects, selected genes showing a fold change (F.C) in expression level of 1.0 and 1.5 relative to diploid are shown. For trans effects, selected genes showing a F.C. in expression level of 0.5, 1.0, 1.5 and >6 are shown. The same data are shown in the graphs at the left and right, which have an expanded Y axis relative to the graphs on the left.

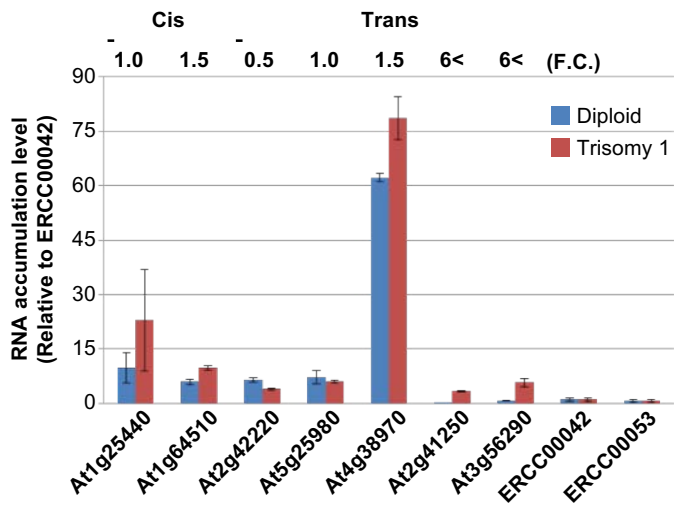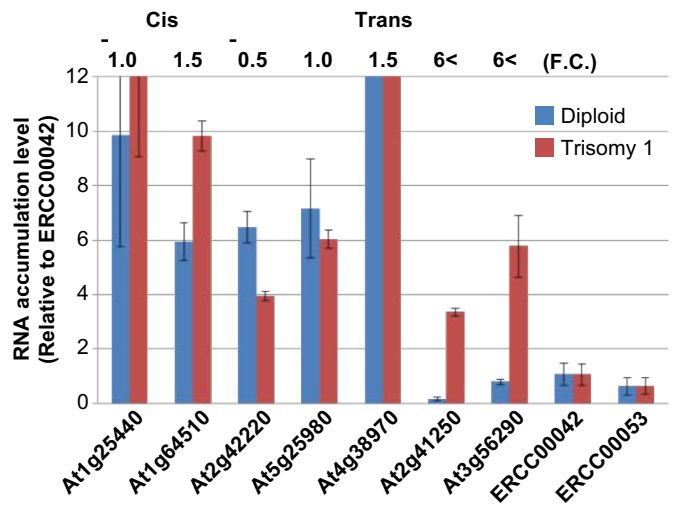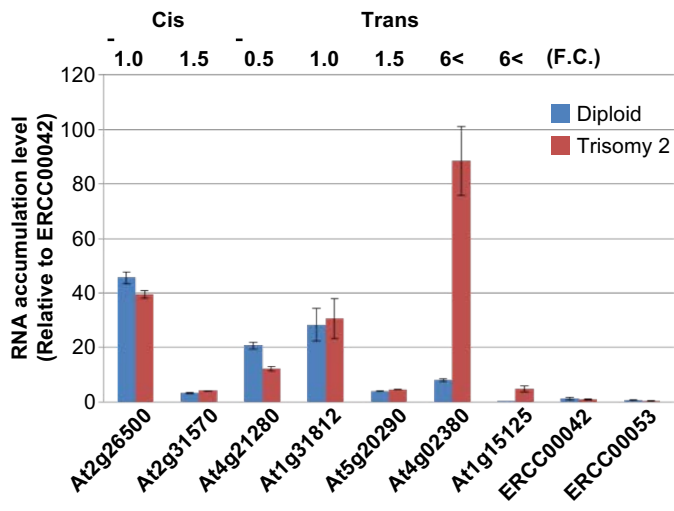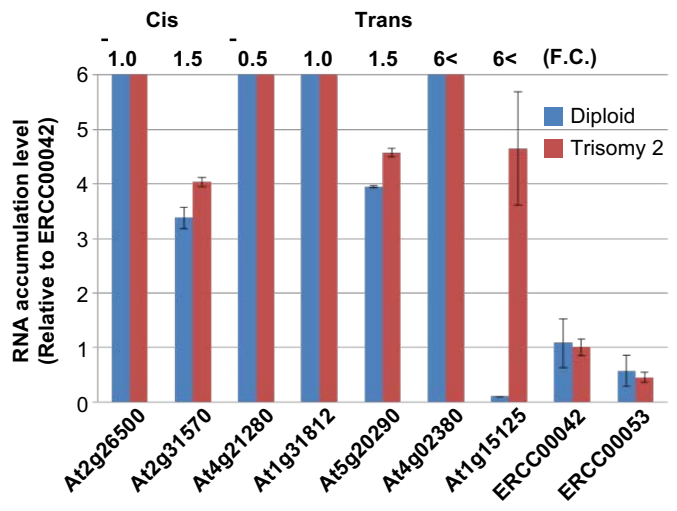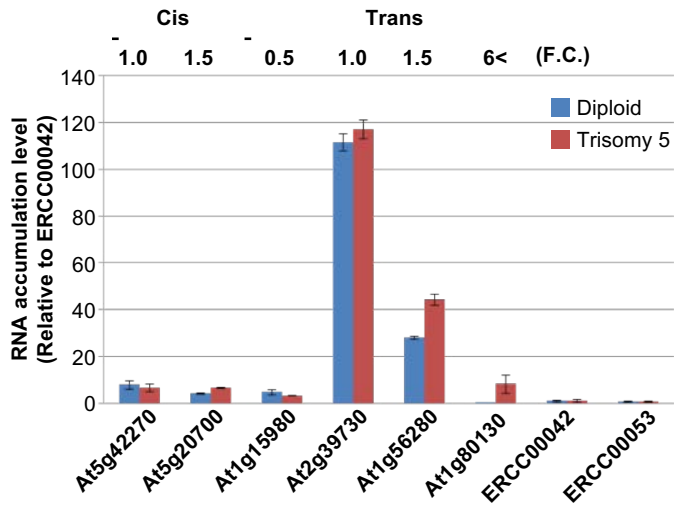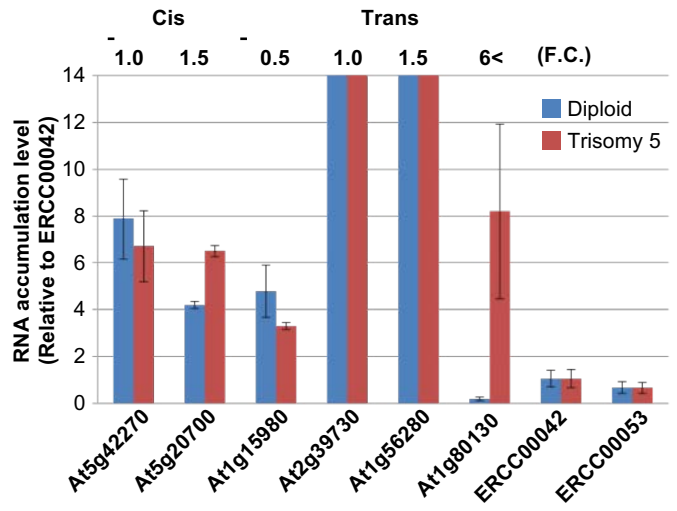

|                  | Gene      | Ratio(qPCR) | Ratio(RNA-seq) |
|------------------|-----------|-------------|----------------|
| Trisomy5/Diploid | At1g15980 | 0.69        | 0.67           |
|                  | At1g56280 | 1.58        | 1.50           |
|                  | At1g80130 | 43.98       | 12.65          |
|                  | At2g39730 | 1.05        | 1.04           |
|                  | At5g20700 | 1.54        | 1.47           |
|                  | At5g42270 | 0.85        | 0.99           |
|                  | At1g25440 | 2.33        | 0.99           |
| Trisomy1/Diploid | At5g25980 | 0.84        | 1.00           |
|                  | At4g38970 | 1.26        | 1.45           |
|                  | At2g41250 | 21.35       | 22.33          |
|                  | At2g42220 | 0.61        | 0.66           |
|                  | At3g56290 | 7.31        | 7.03           |
|                  | At1g64510 | 1.65        | 1.51           |
|                  | At4g02380 | 10.96       | 13.66          |
| Trisomy2/Diploid | At1g15125 | 46.18       | 32.65          |
|                  | At5g20290 | 1.16        | 1.46           |
|                  | At4g21280 | 0.59        | 0.67           |
|                  | At2g26500 | 0.87        | 1.02           |
|                  | At2g31570 | 1.20        | 1.48           |
|                  | At1g31812 | 1.08        | 1.00           |



Fig. S4. Ratio distributions for each trisomic partitioned into arbitrary low, medium and high expression ranges. Analyses were performed as described in Materials and Methods and in Fig. 1.

# Trisomy 1

low

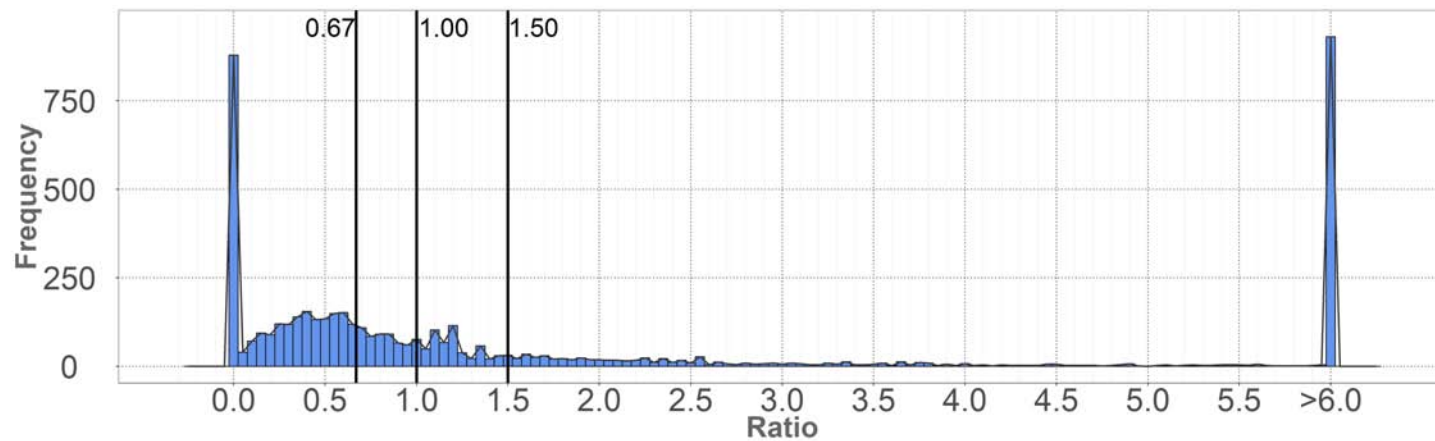

medium

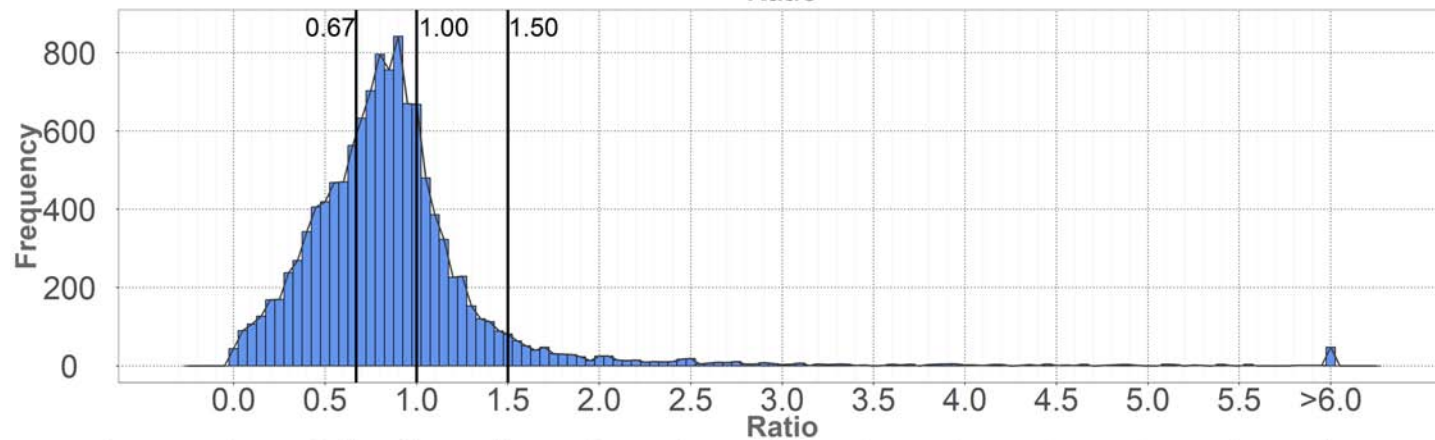

high

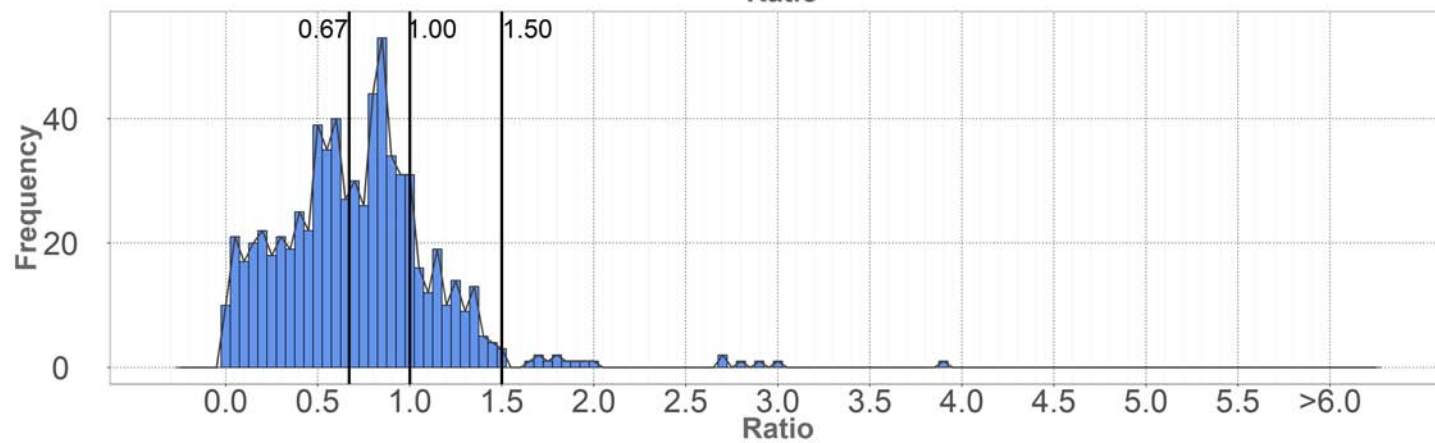

# Trisomy 2

low

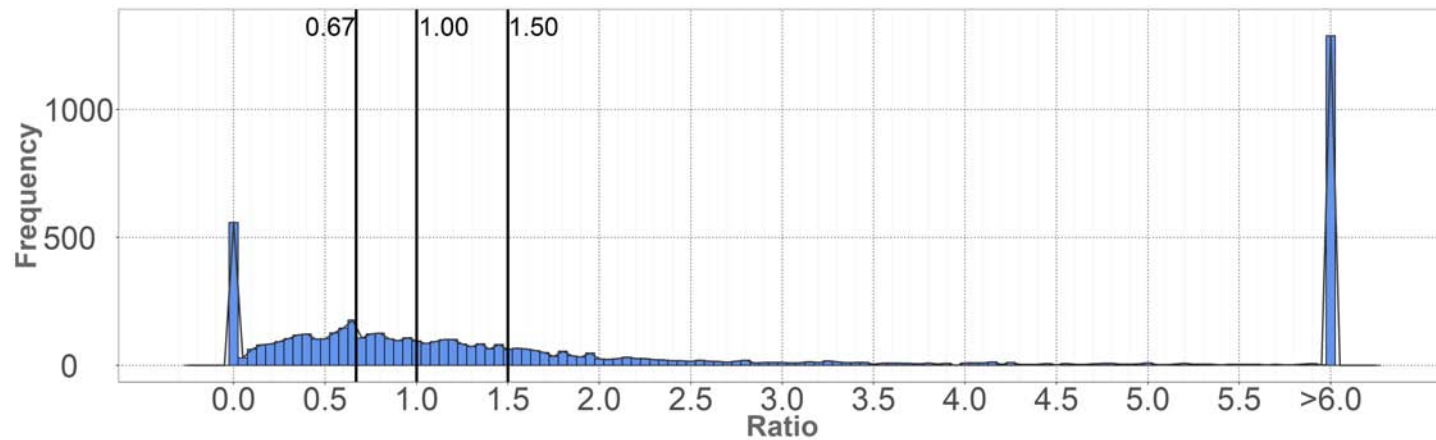

medium

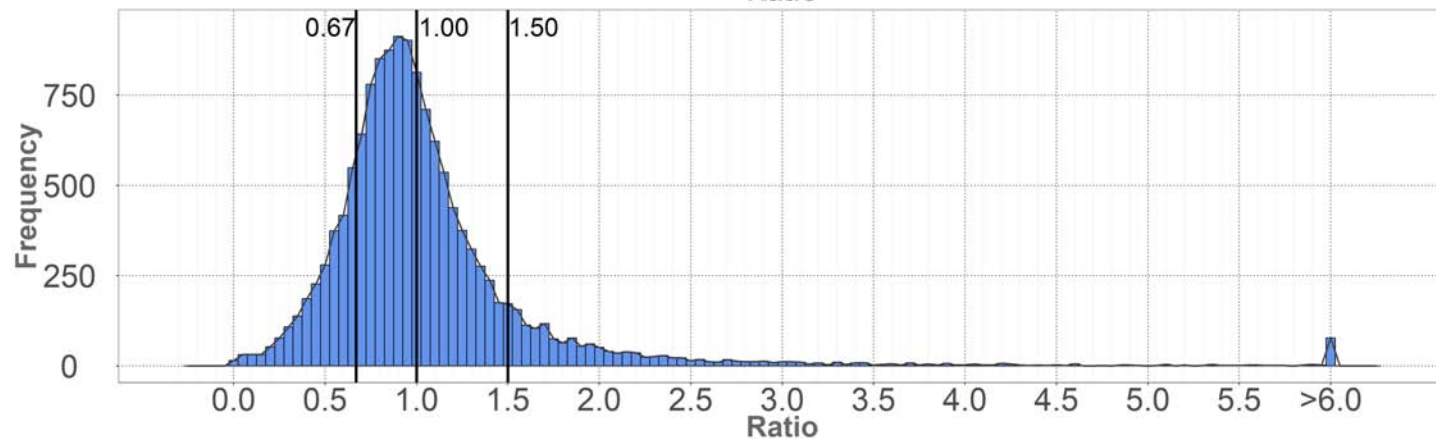

high

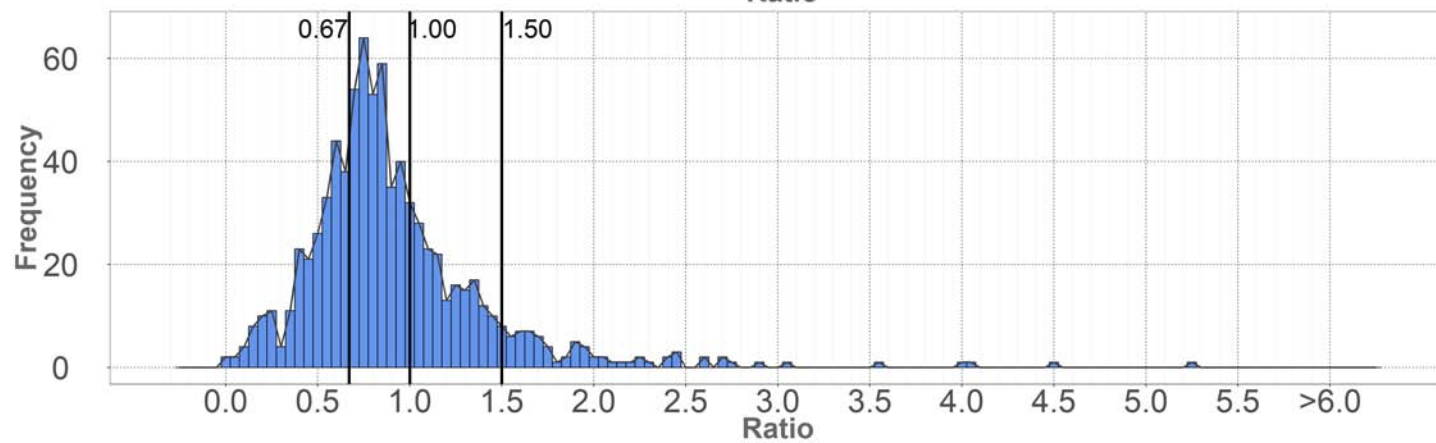

# Trisomy 3

low

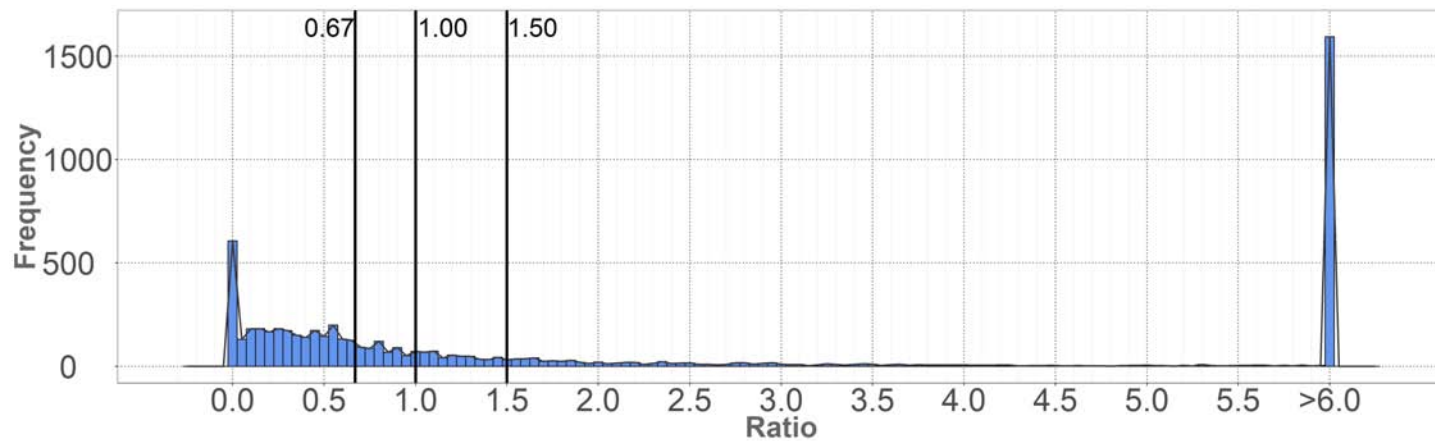

medium

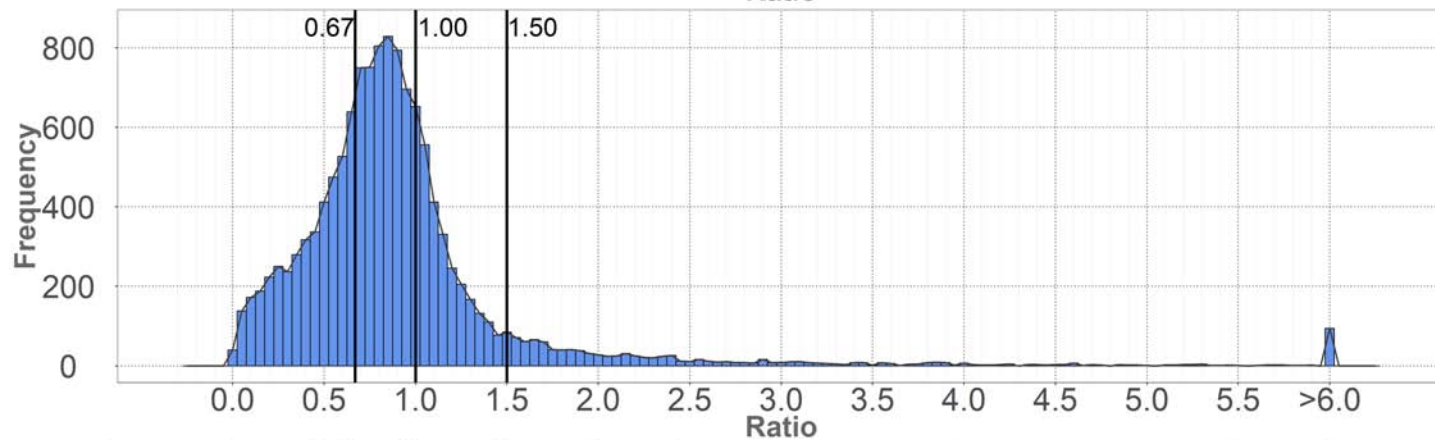

high

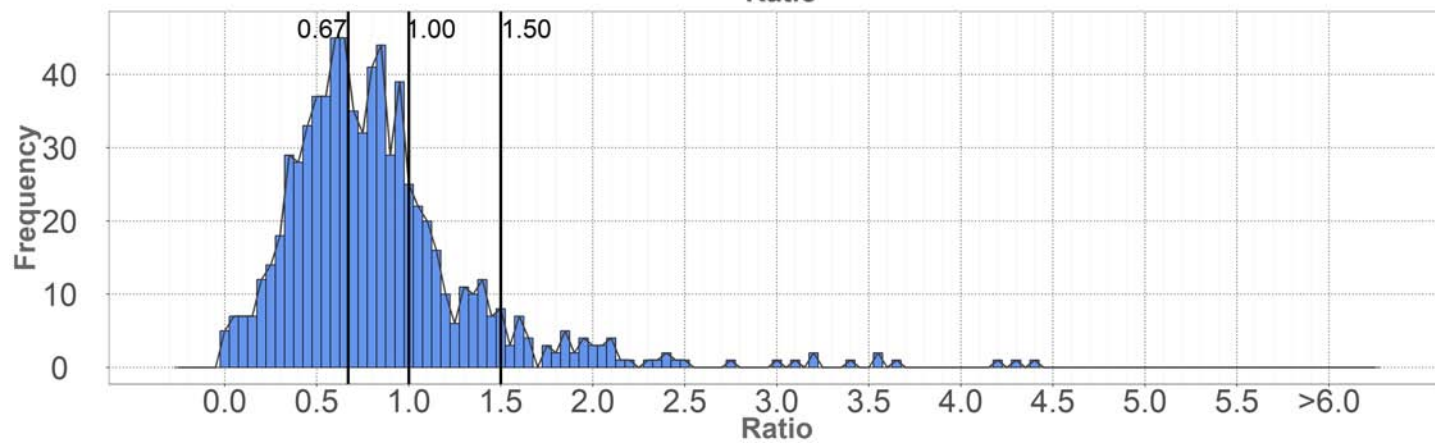

# Trisomy 4

low

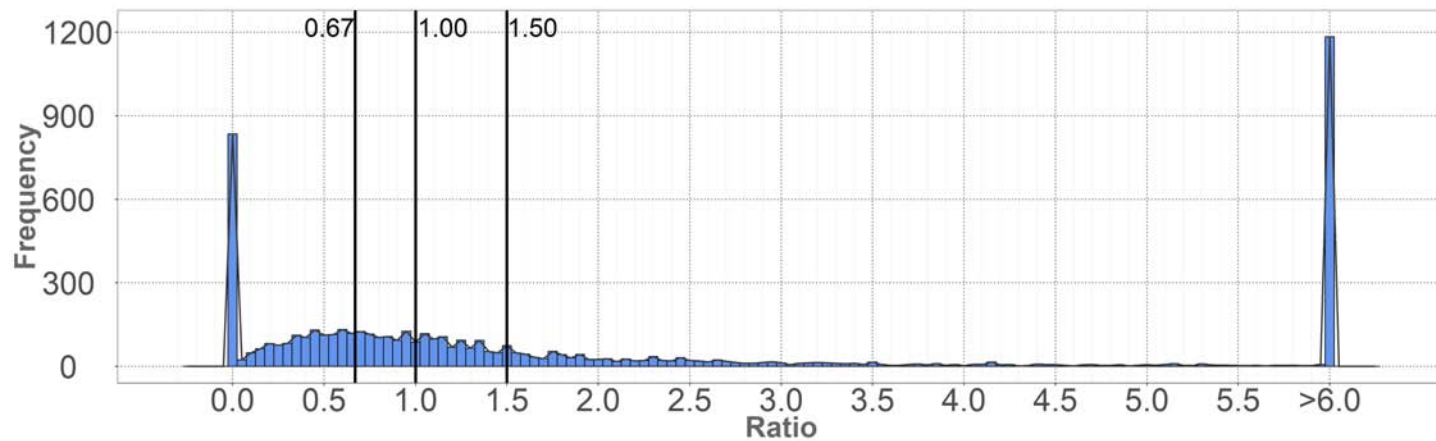

medium

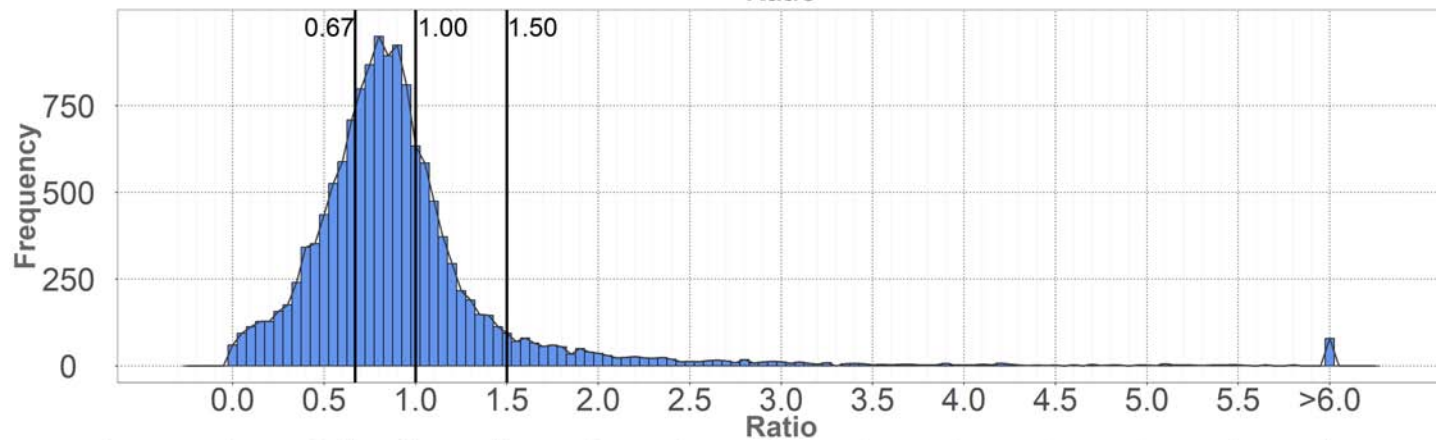

high

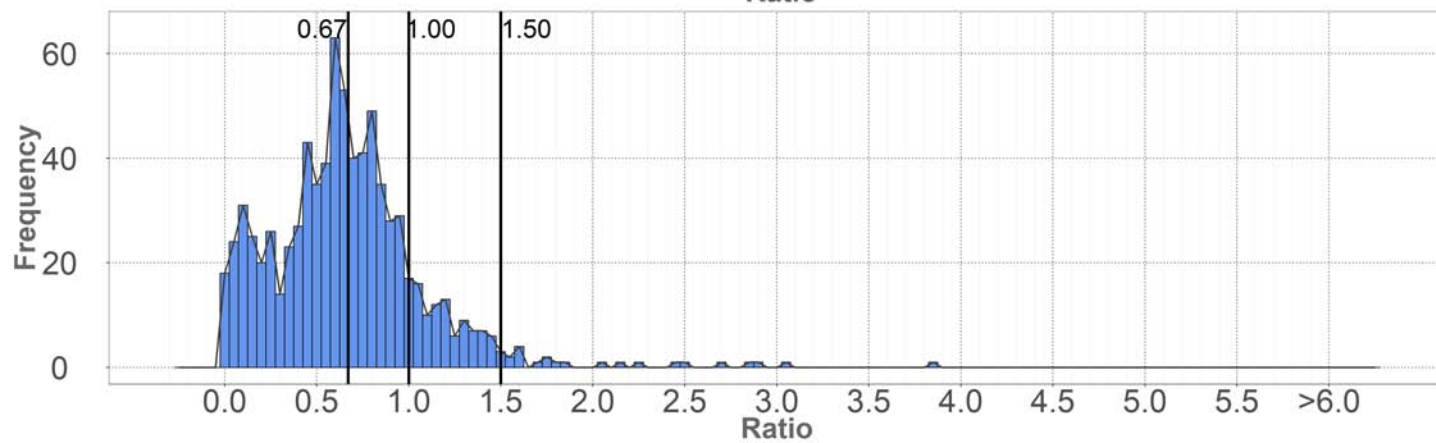

# Trisomy 5

low

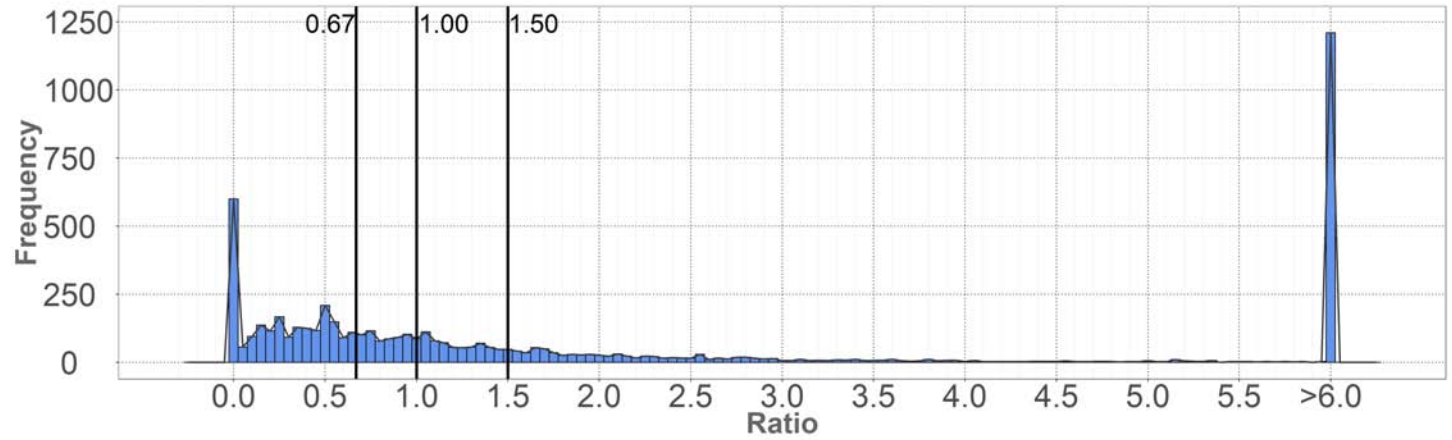

medium

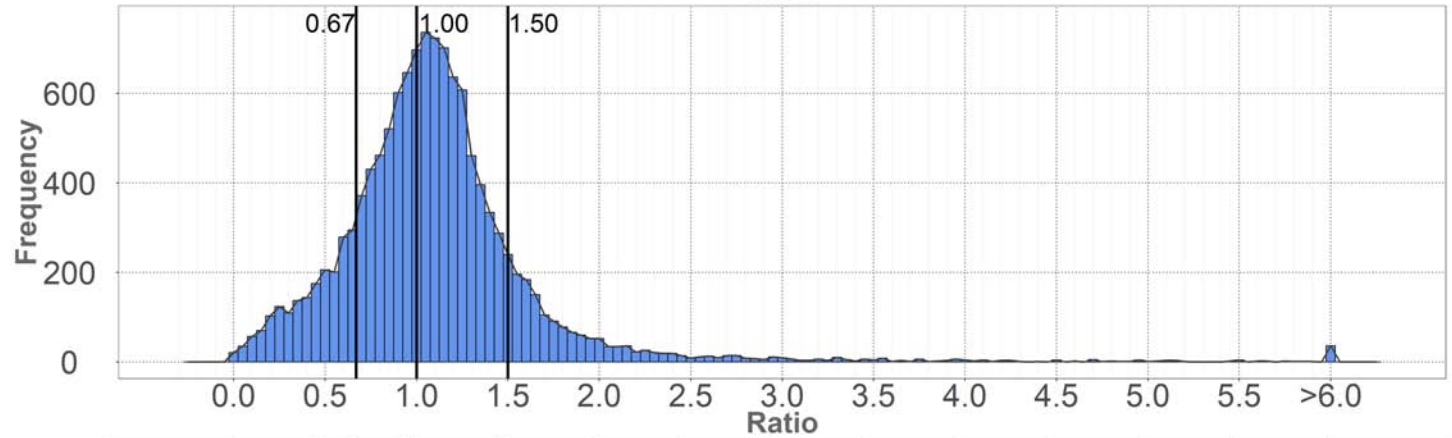

high

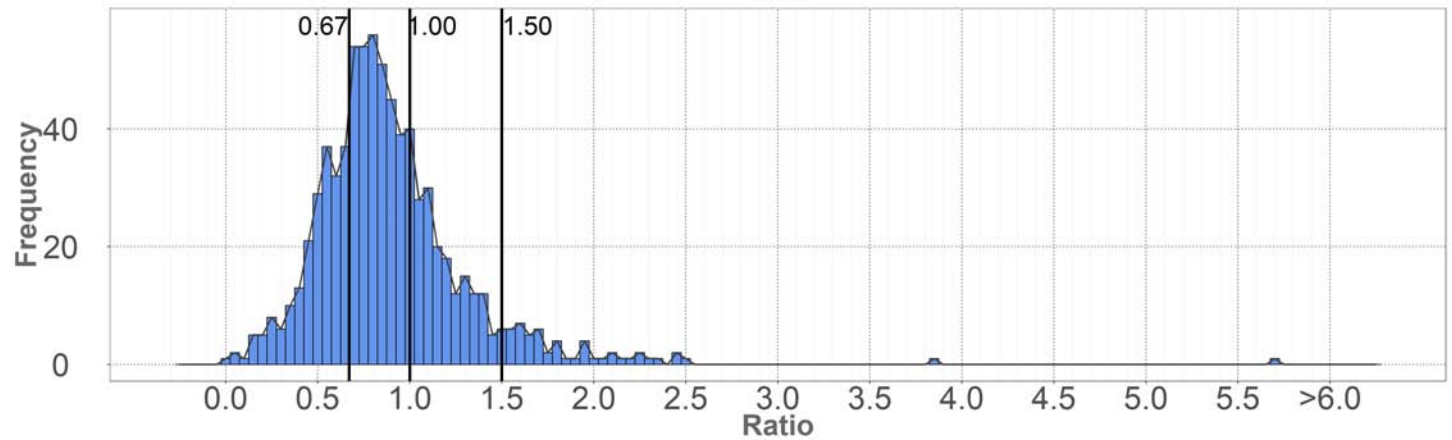

Fig. S5. Scatter plots of significant ratios for the functional class of transcription factors. Plots were generated as described in Fig. S2.

# Trisomy 1: Transcription factors

*cis*

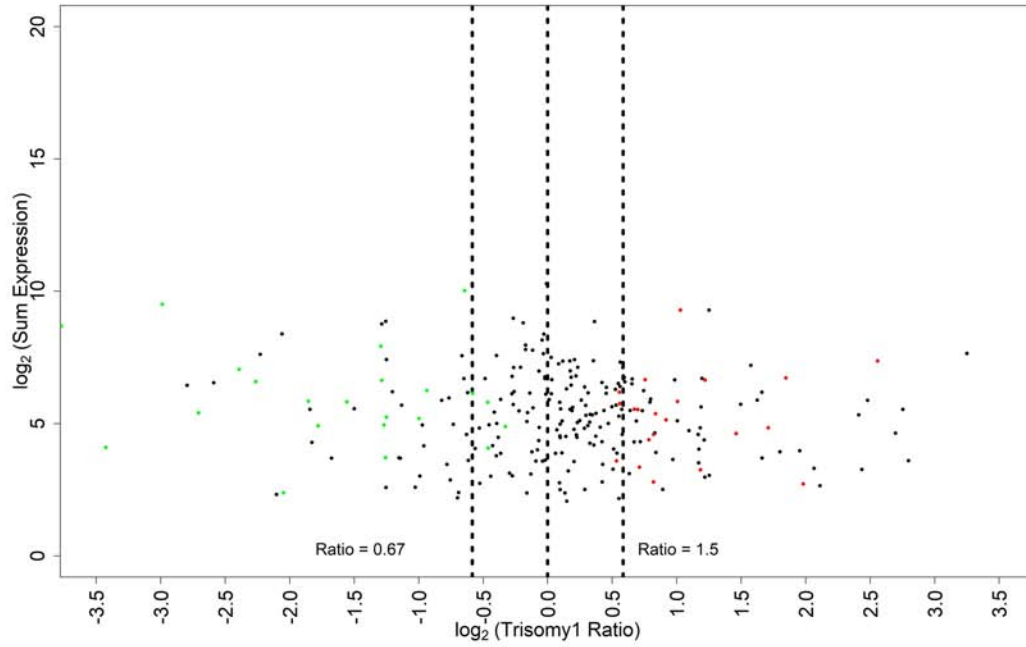

*trans*

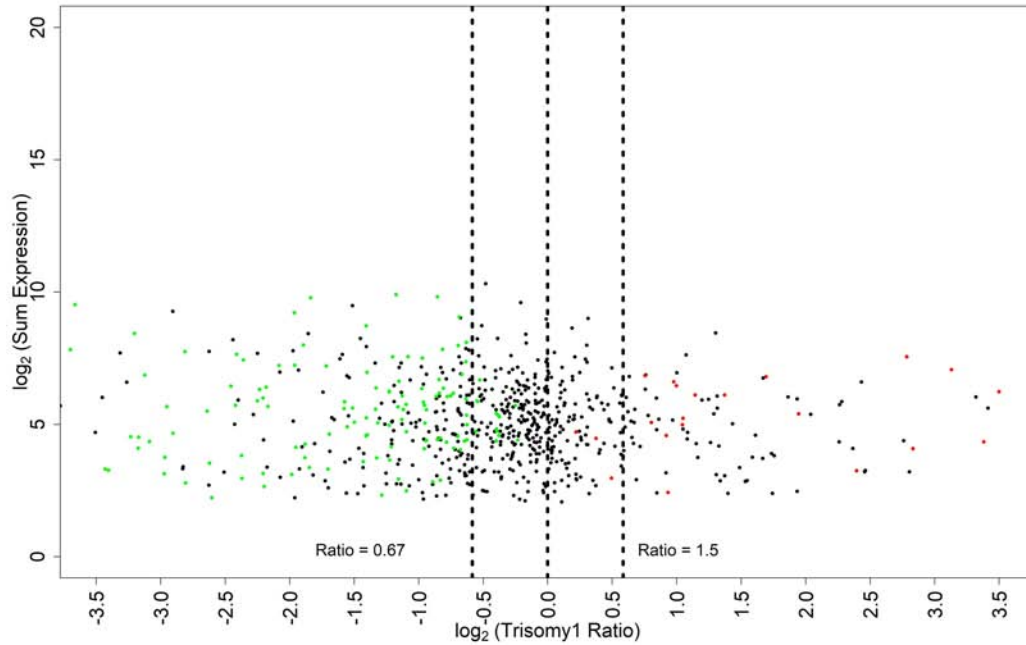



# Trisomy 2: Transcription factors

*cis*

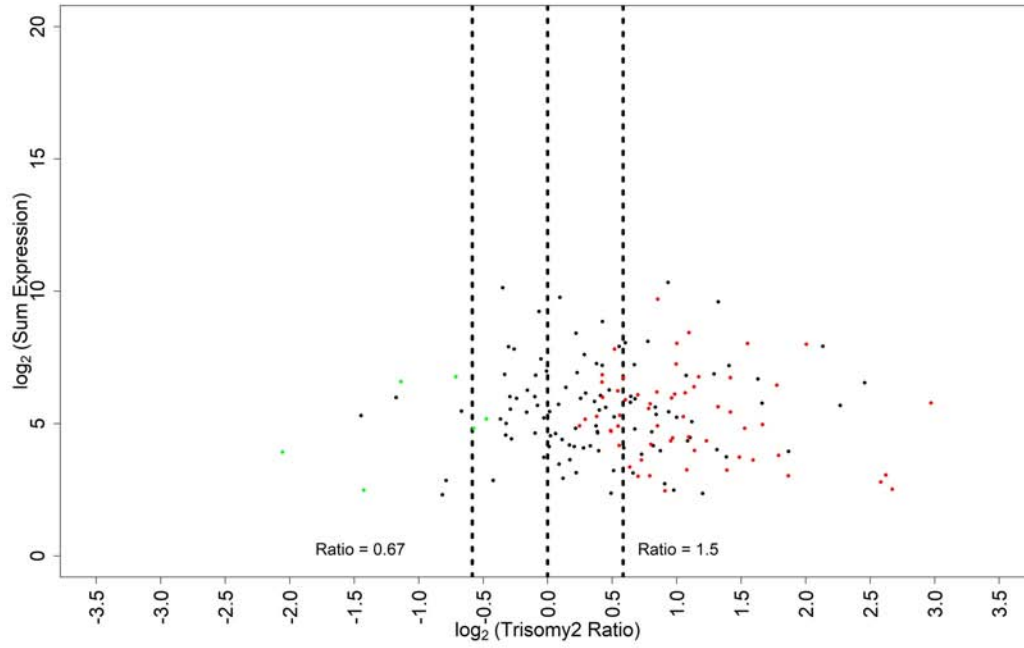

*trans*

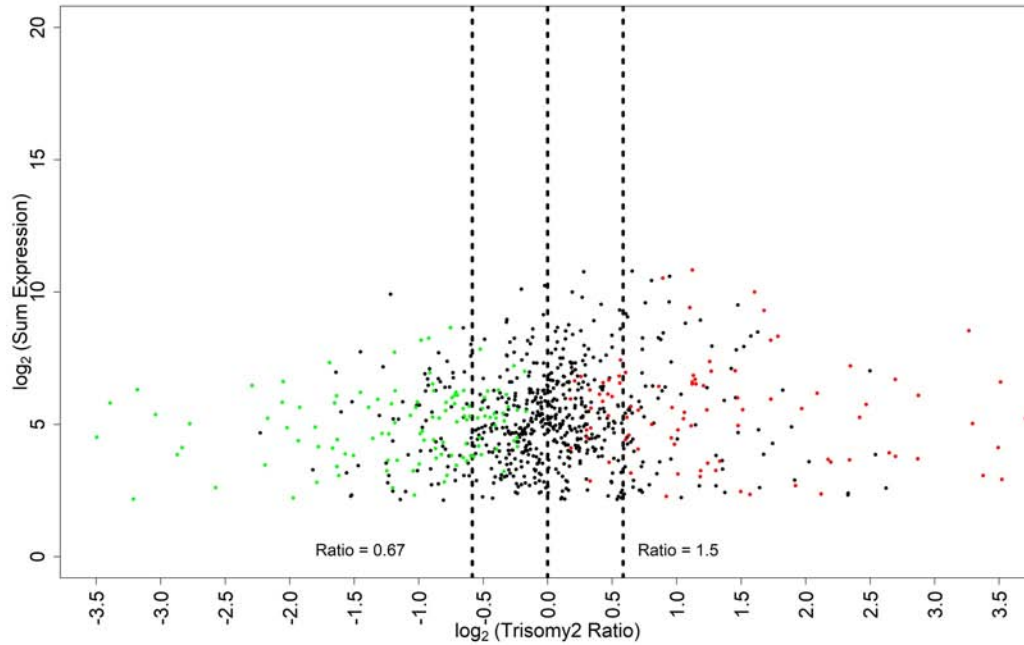

# Trisomy 3: Transcription factors

*cis*

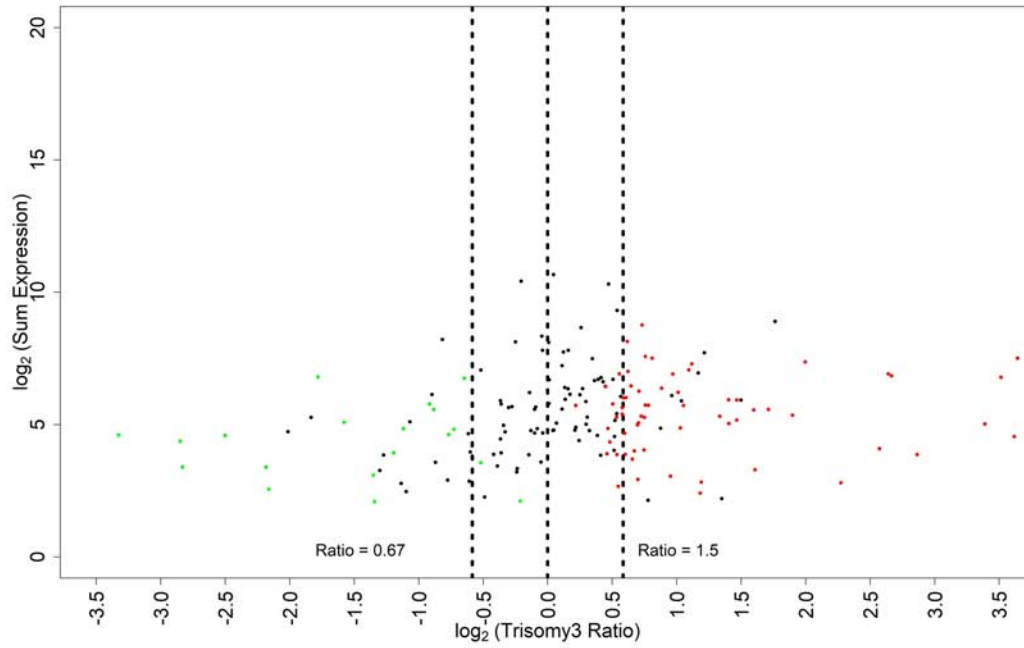

*trans*

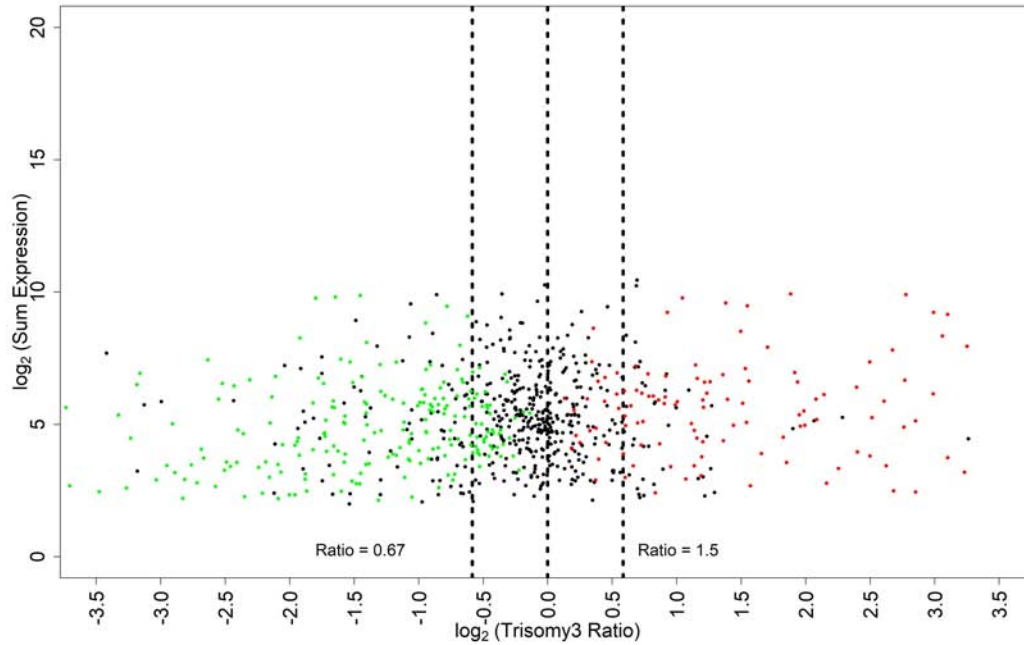

# Trisomy 4: Transcription factors

*cis*

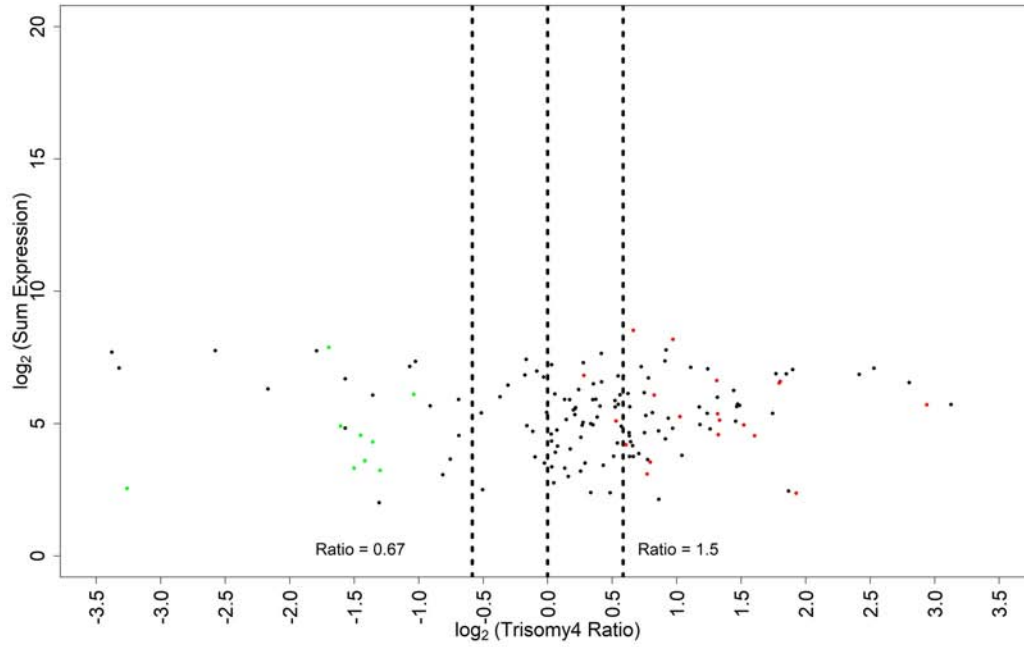

*trans*

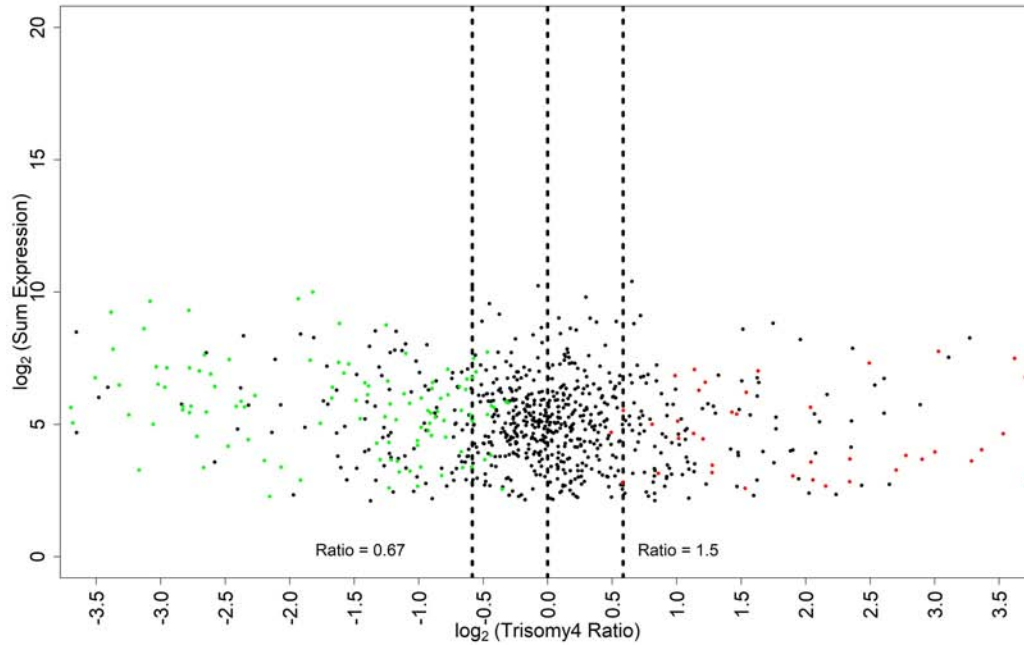

# Trisomy 5: Transcription factors

*cis*

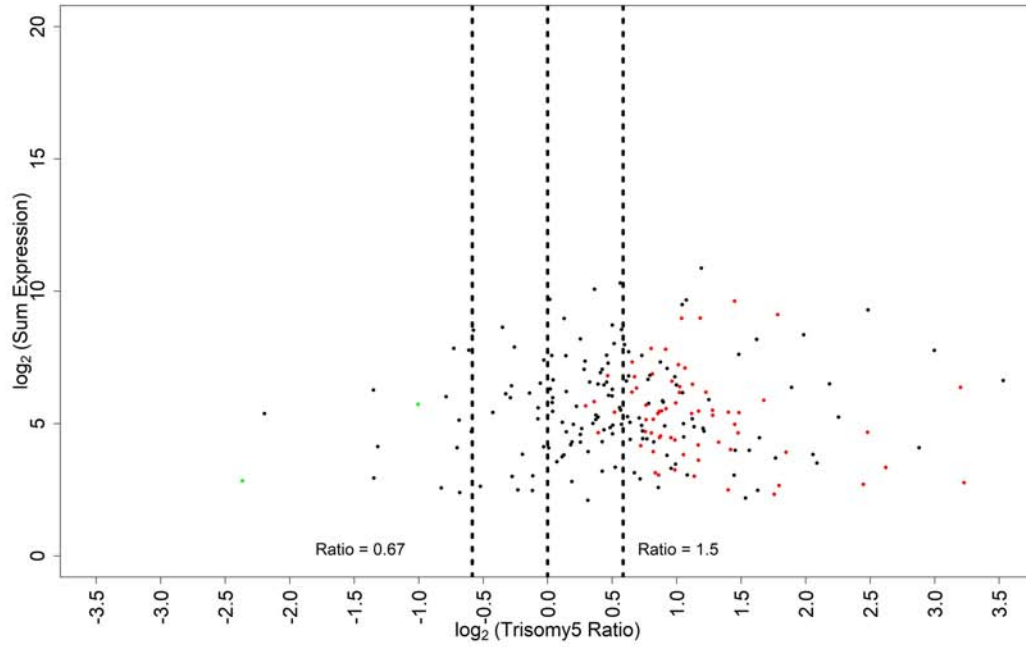

*trans*

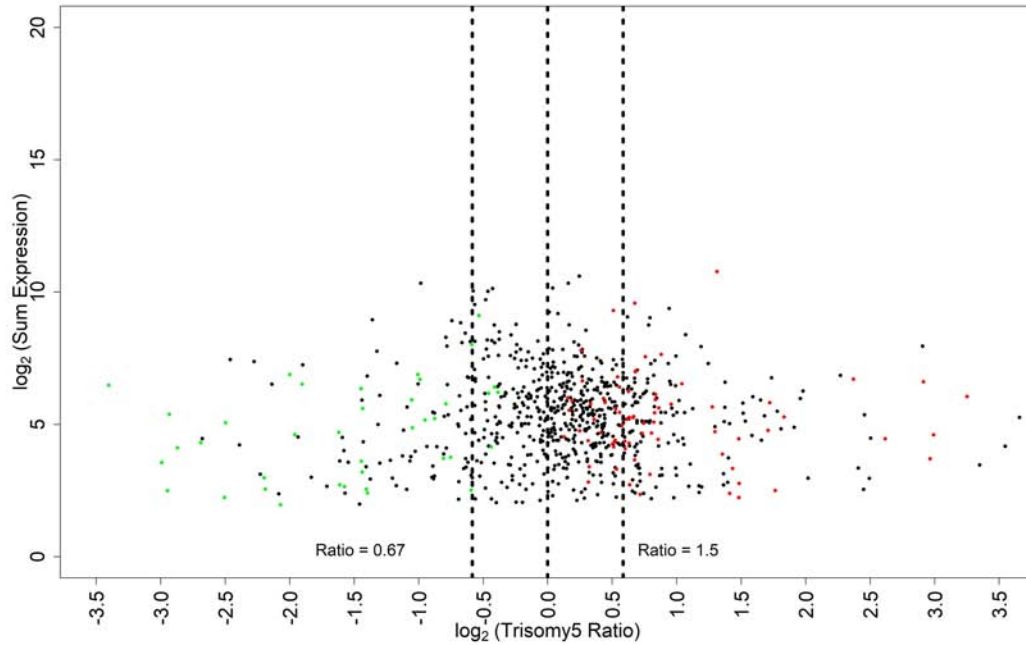

# Transcription factors

Triploid

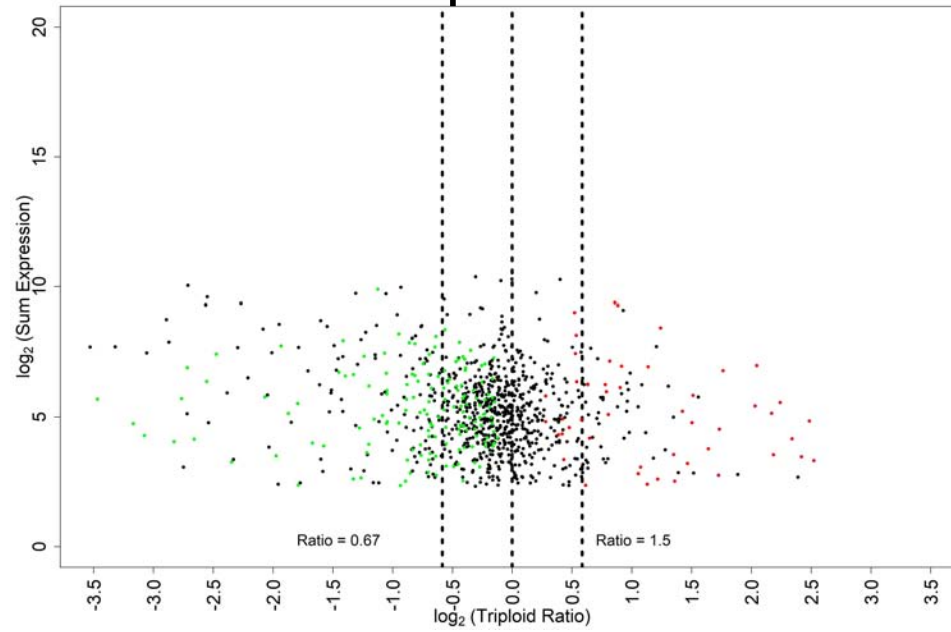

Tetraploid

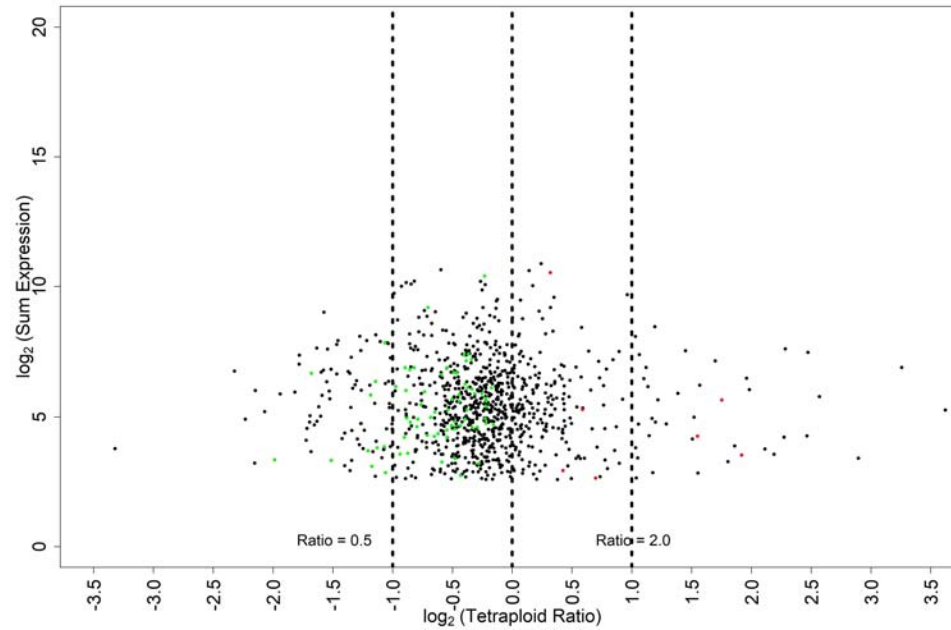

Fig. S6. Ratio distributions and scatter plots of significant ratios for the functional class of signal transduction. Distributions were generated as described in Fig. 1 and scatter plots as described in Fig. S2.

# Trisomy 1: Signal transduction

*cis*

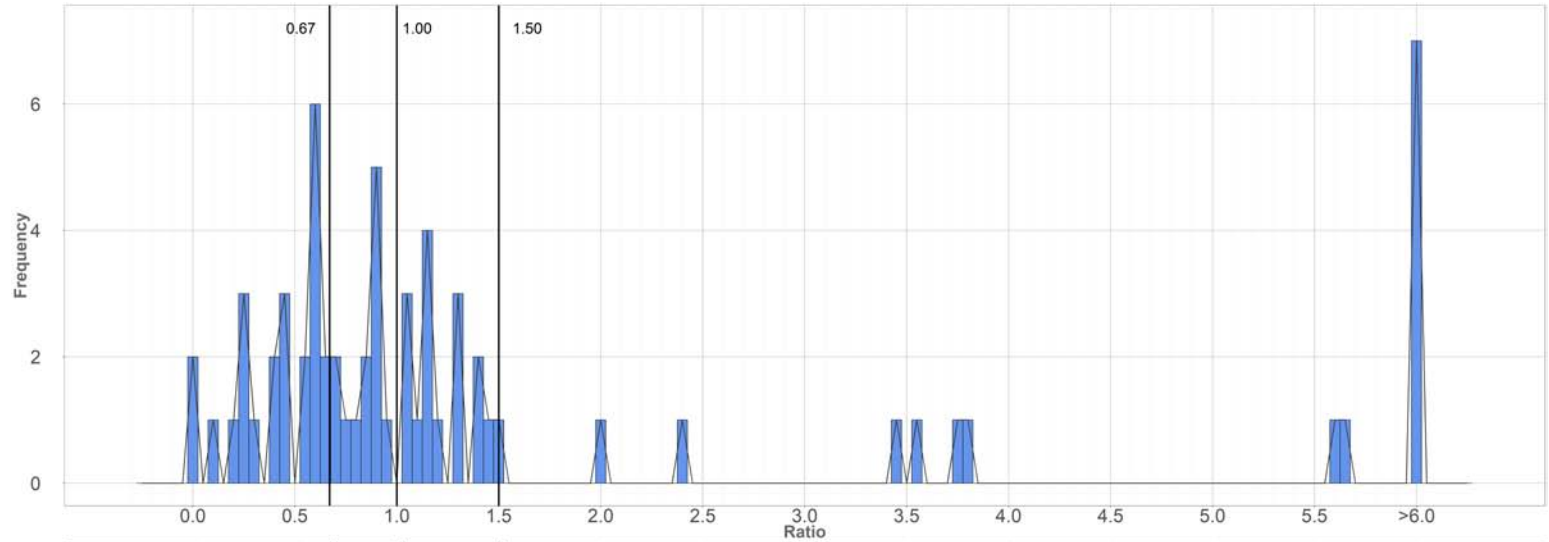

*trans*

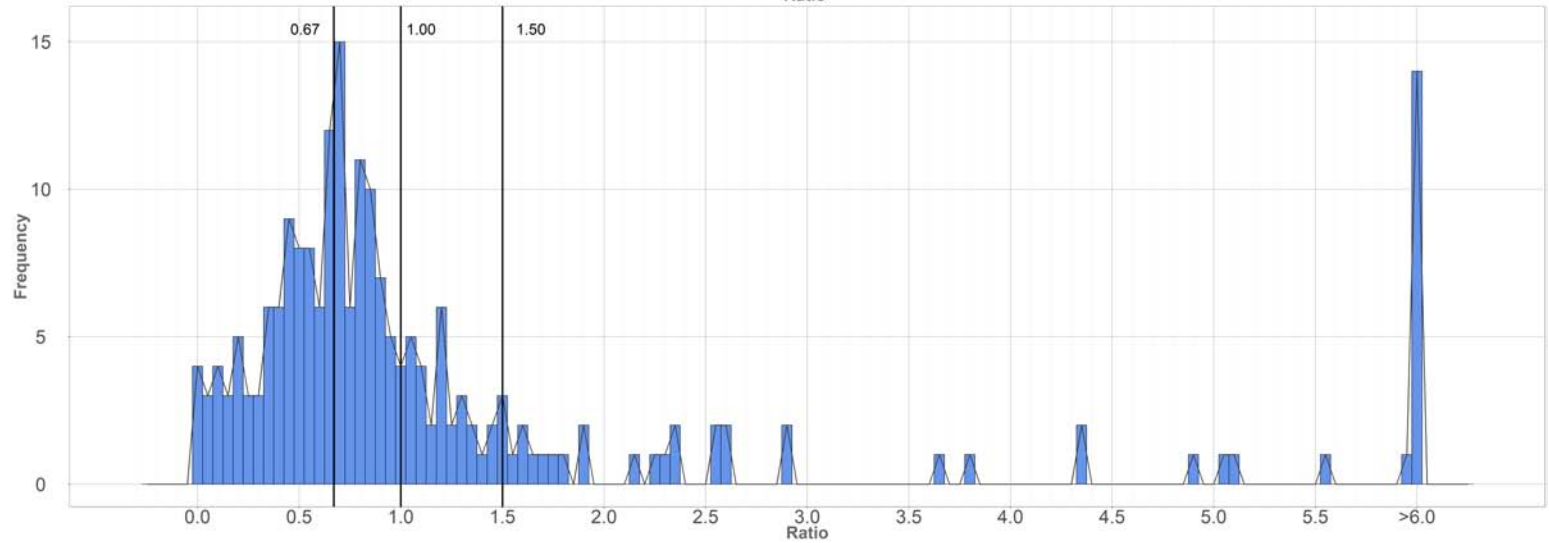

# Trisomy 2: Signal transduction

*cis*

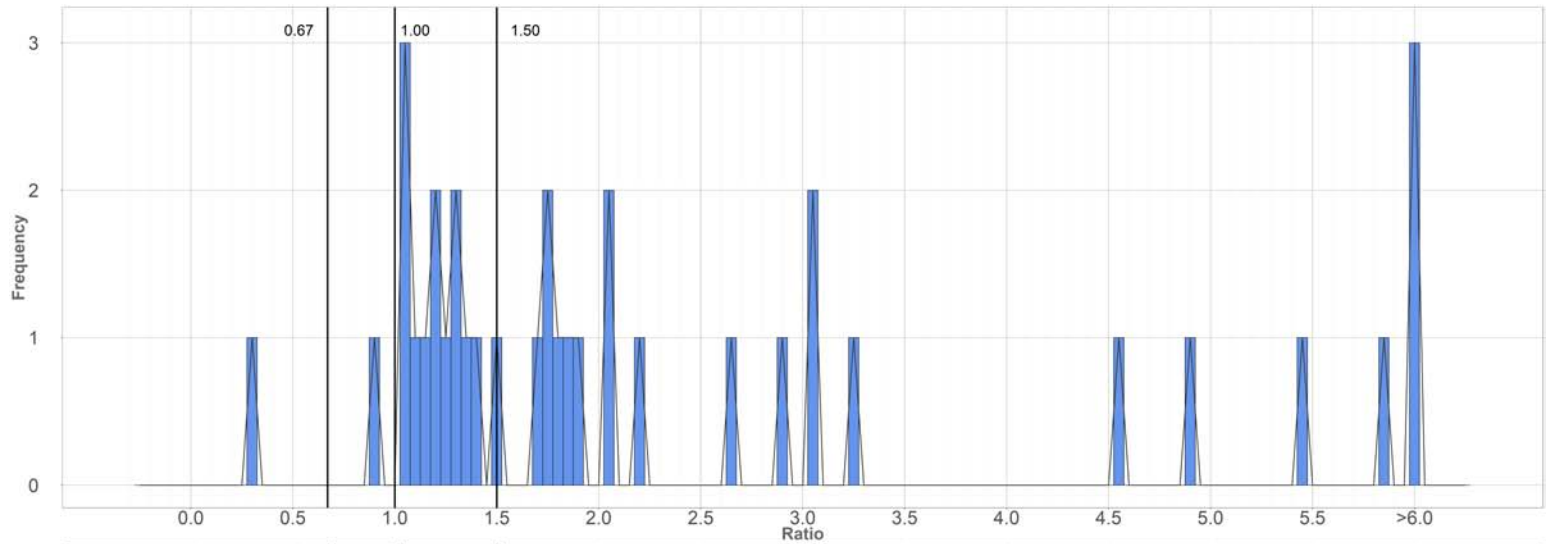

*trans*

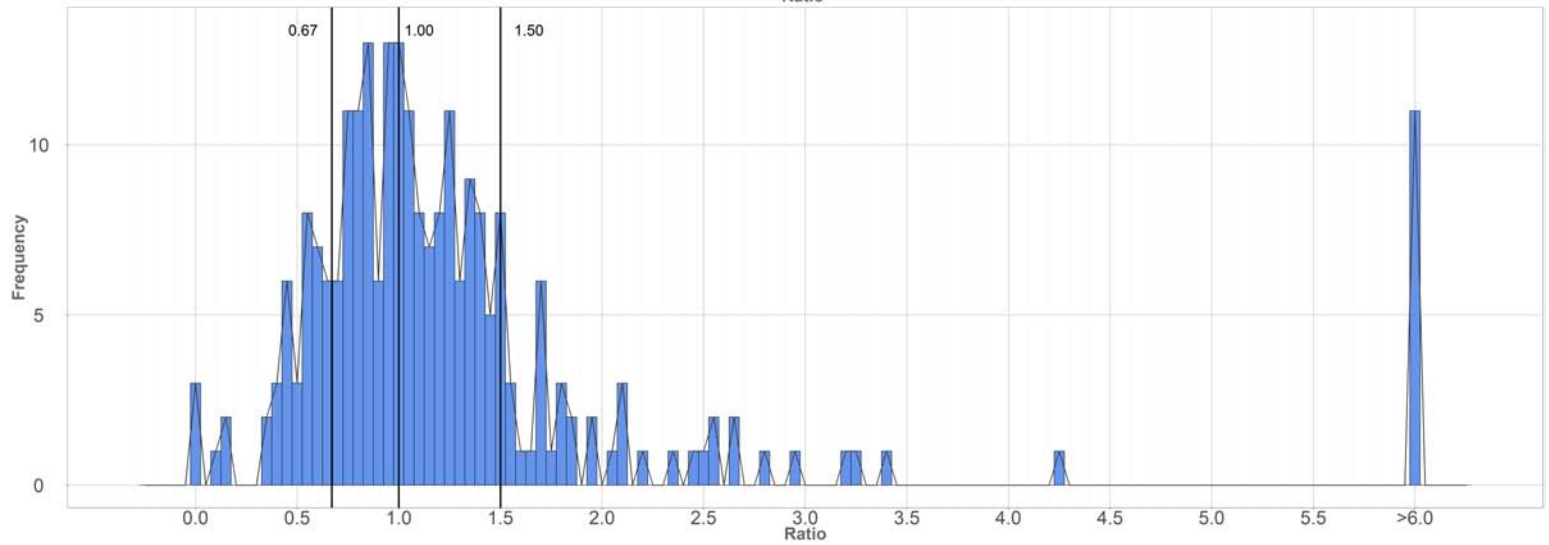



# Trisomy 3: Signal transduction

*cis*

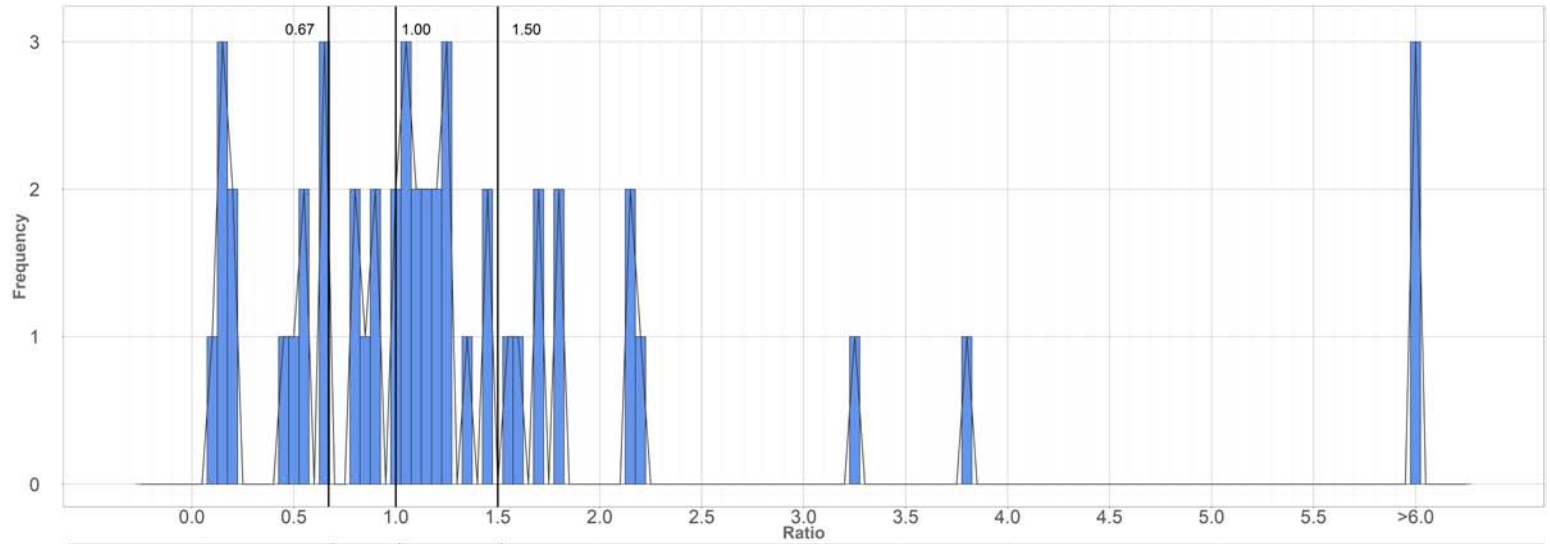

*trans*

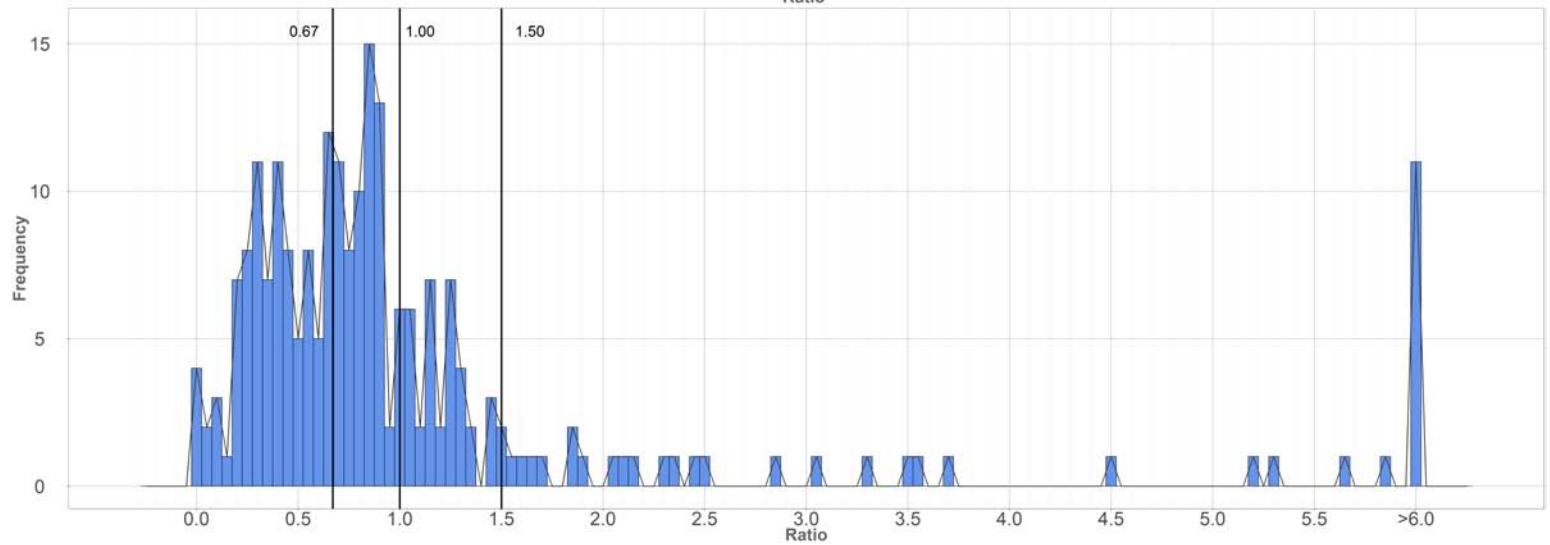

# Trisomy 4: Signal transduction

*cis*

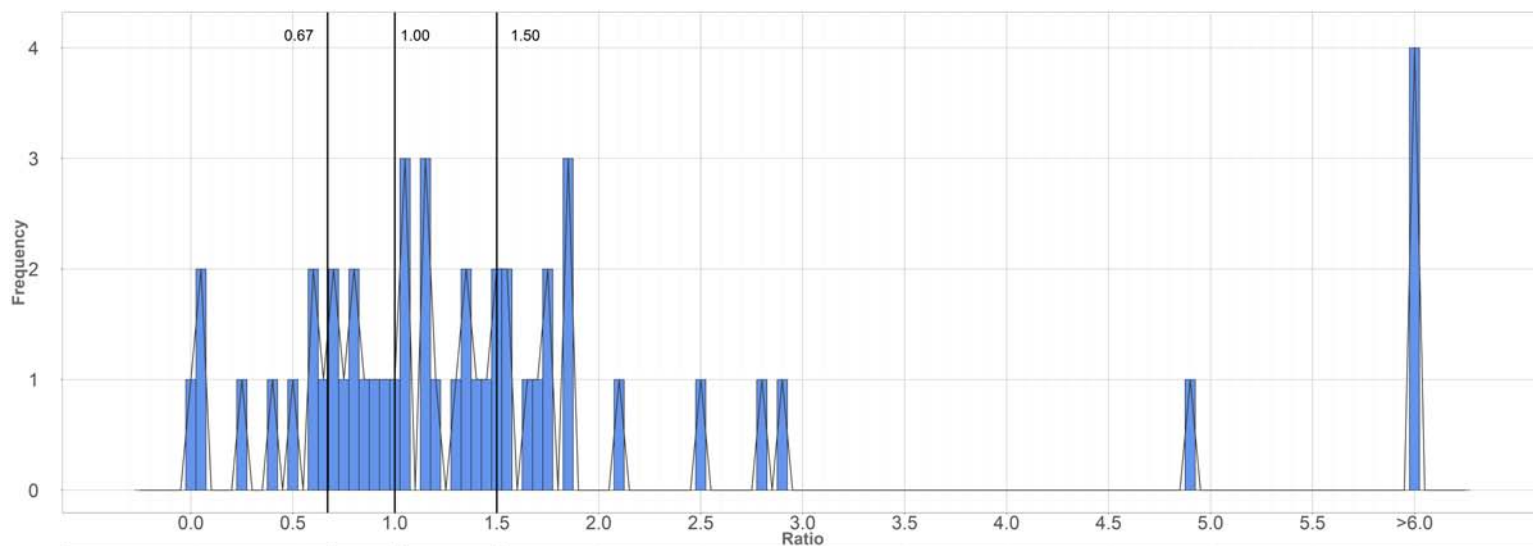

*trans*

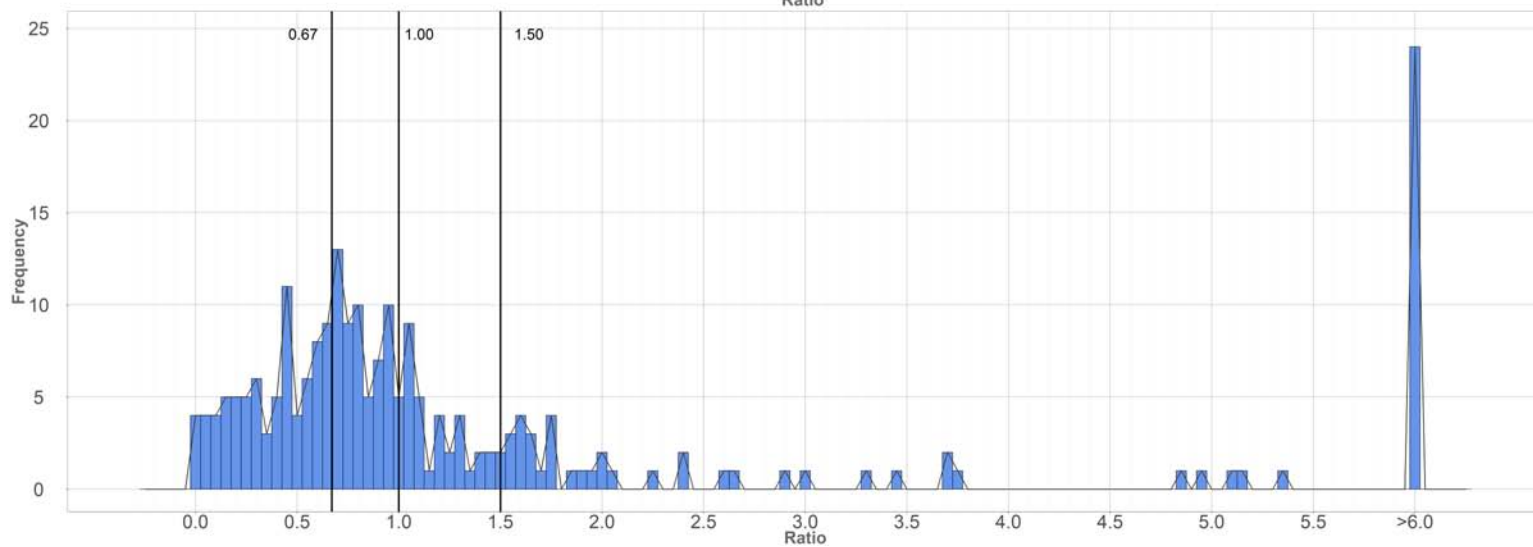

# Trisomy 5: Signal transduction

*cis*

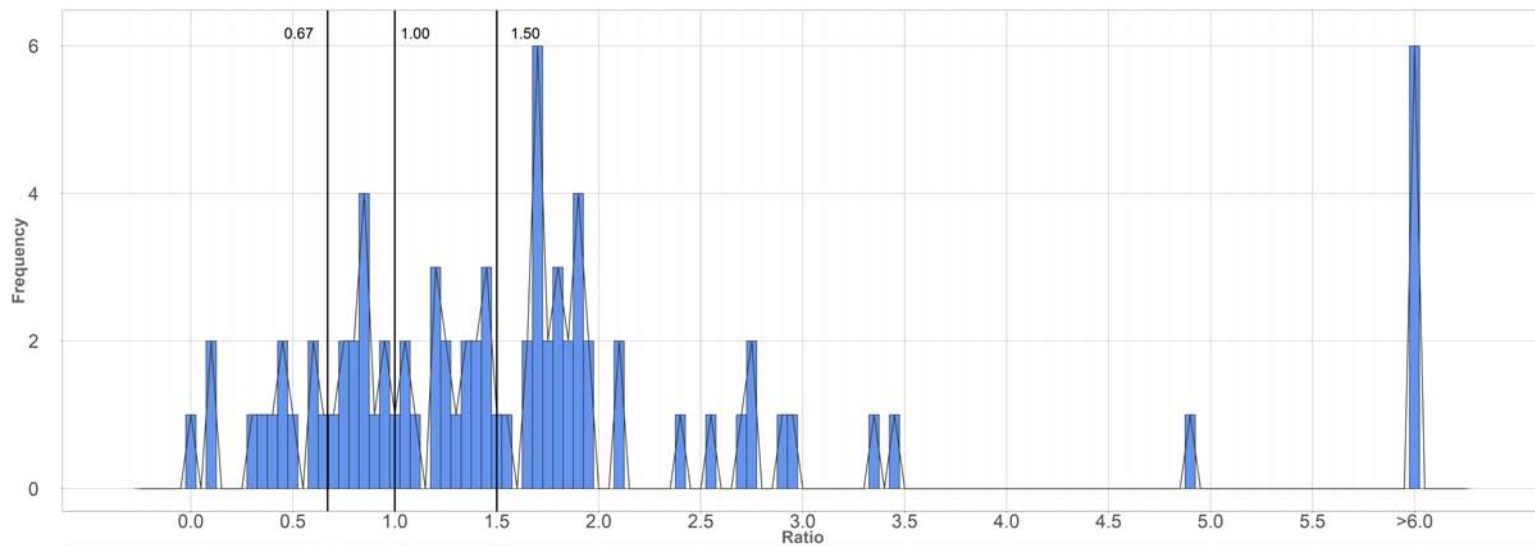

*trans*

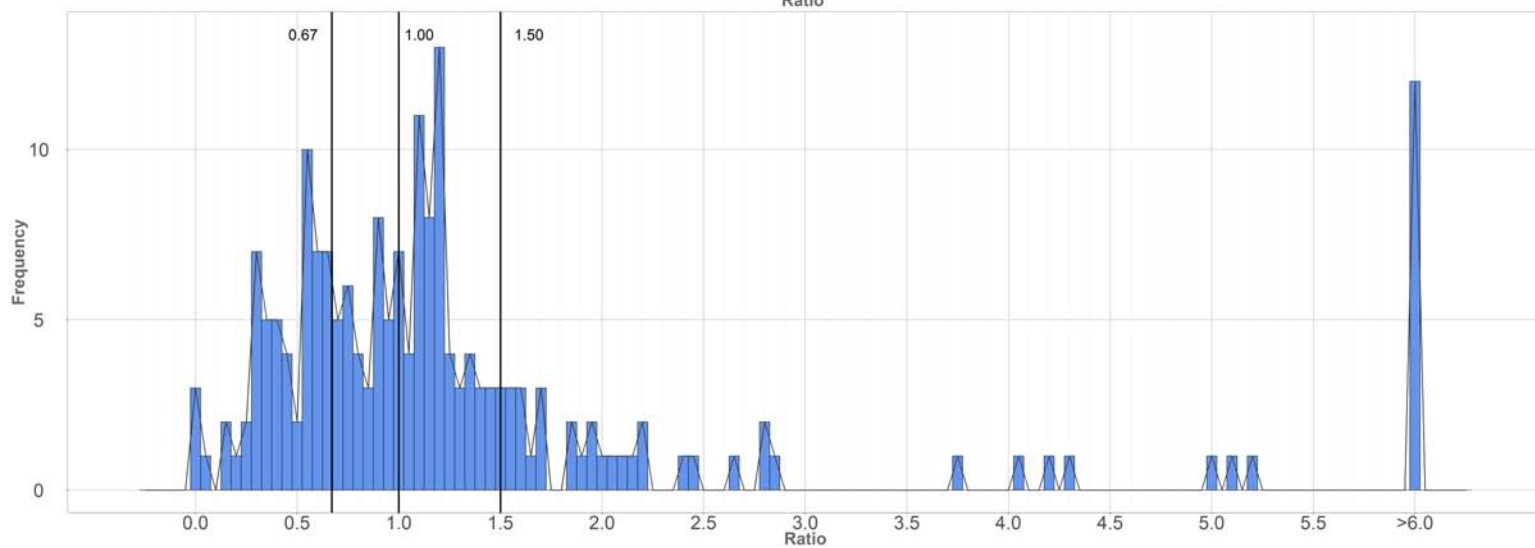

# Signal transduction

Triploid

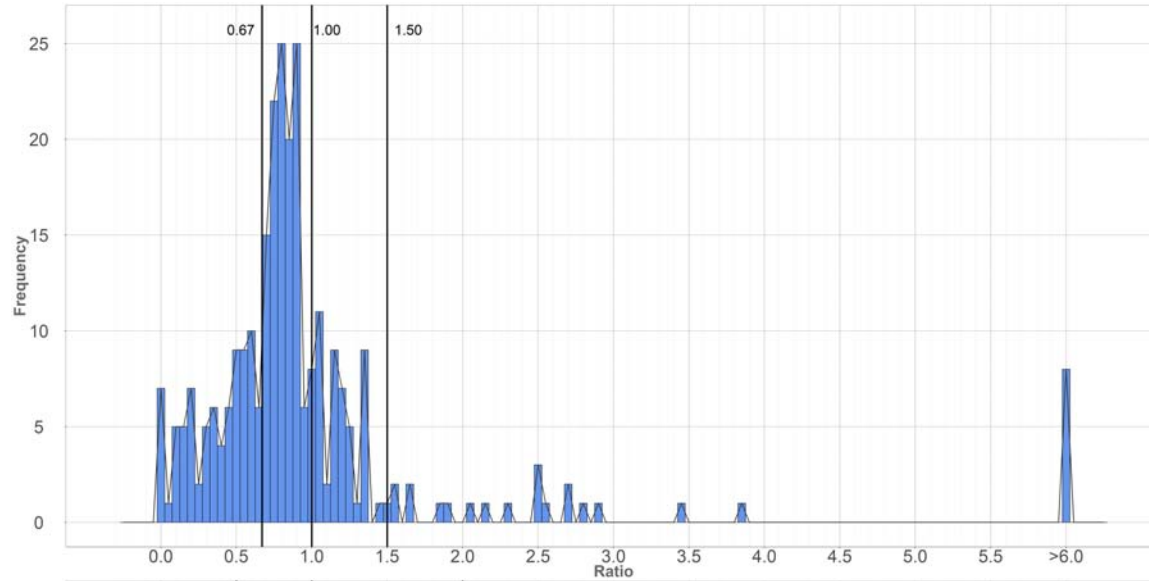

Tetraploid

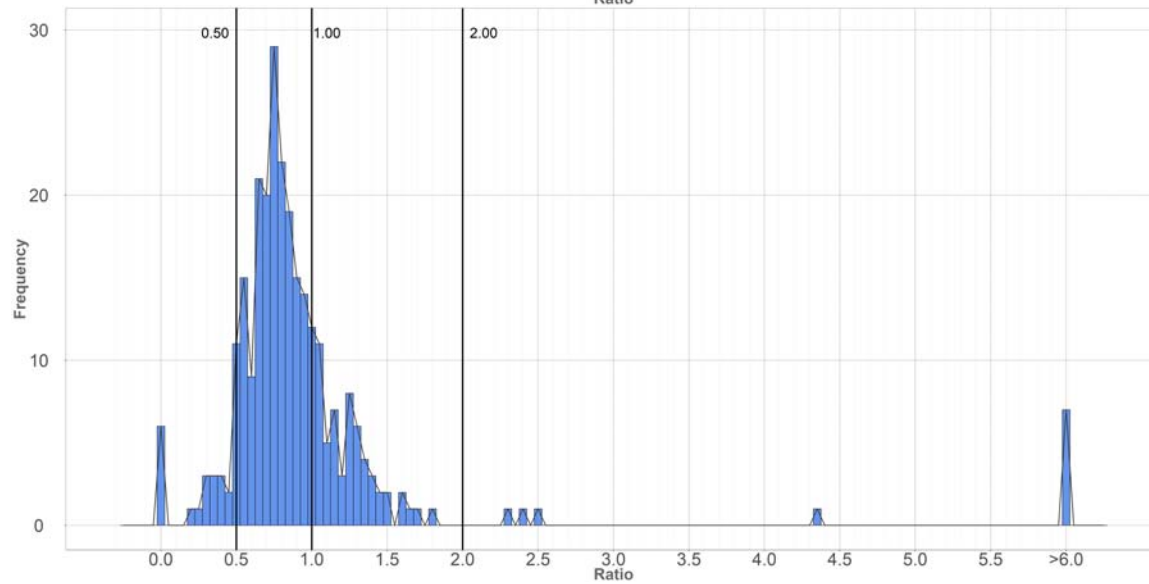

# Trisomy 1: Signal transduction

*cis*

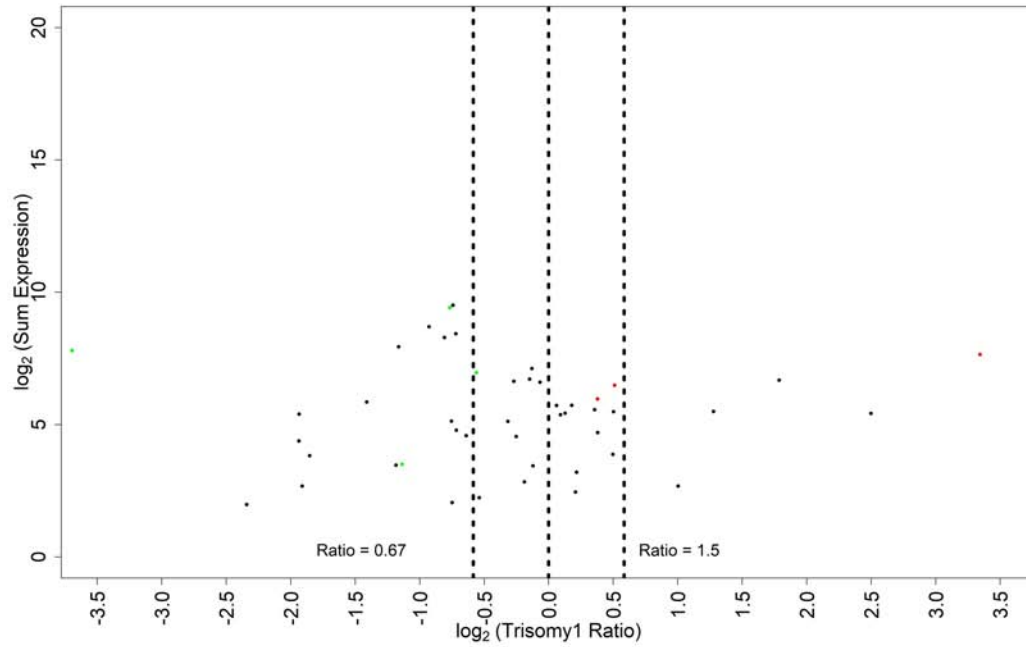

*trans*

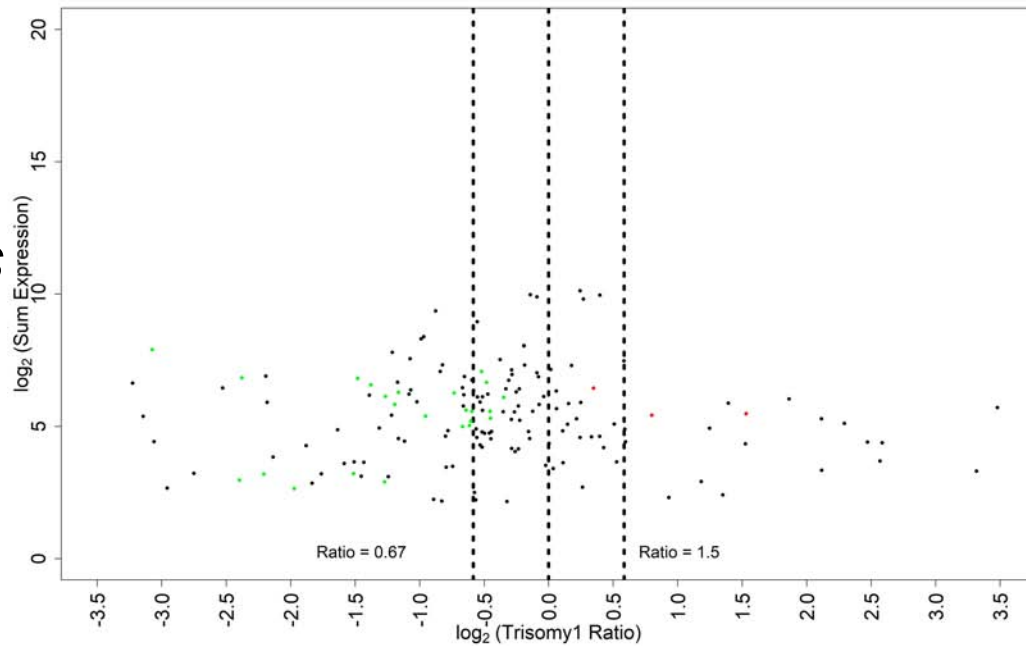

# Trisomy 2: Signal transduction

*cis*

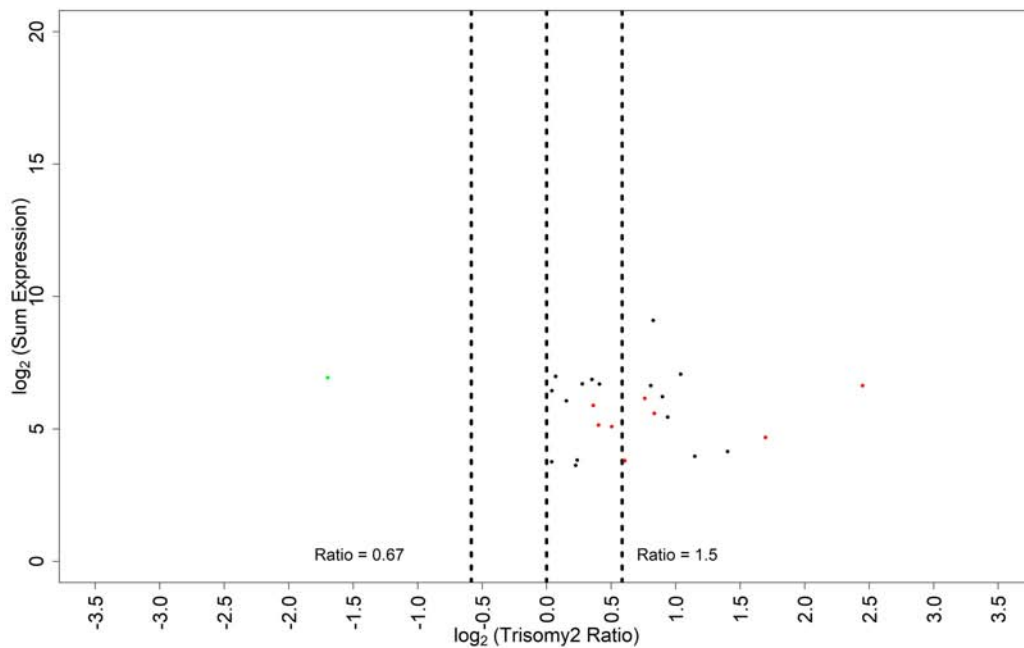

*trans*

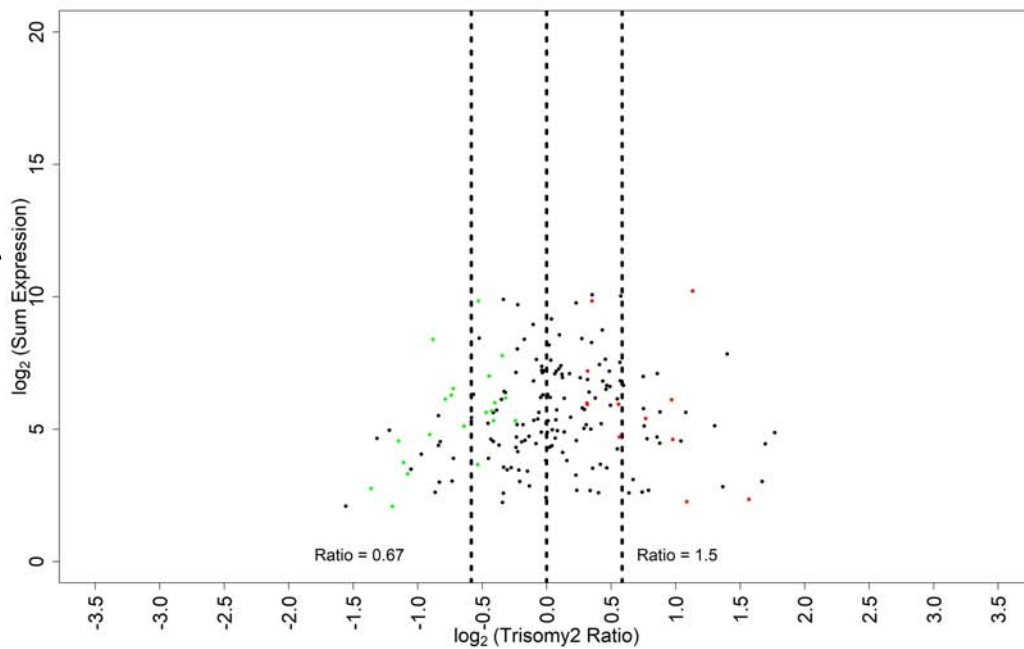

# Trisomy 3: Signal transduction

*cis*

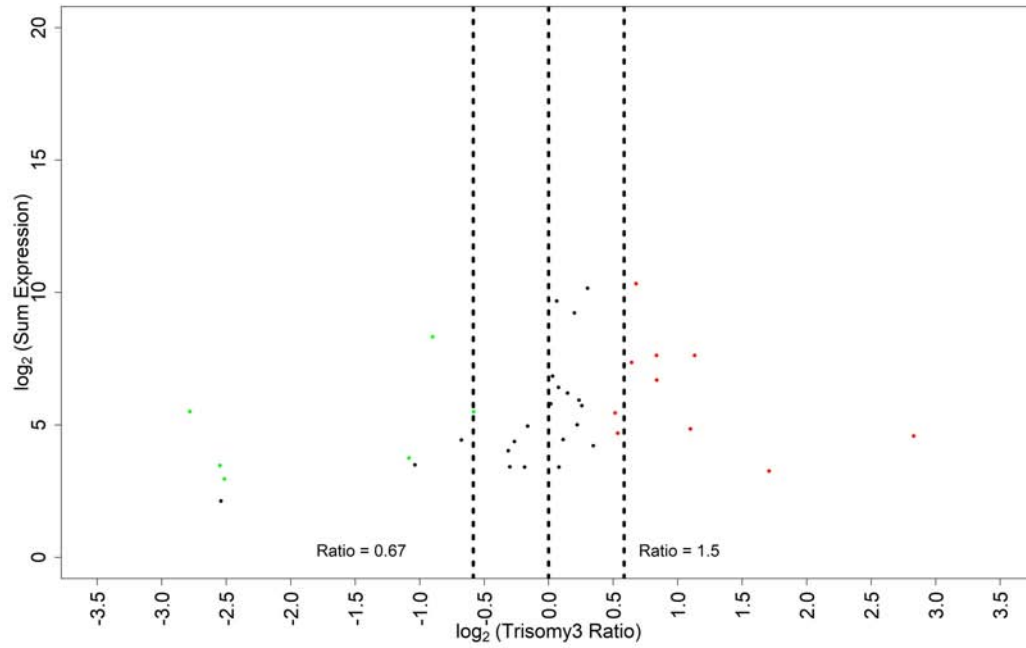

*trans*

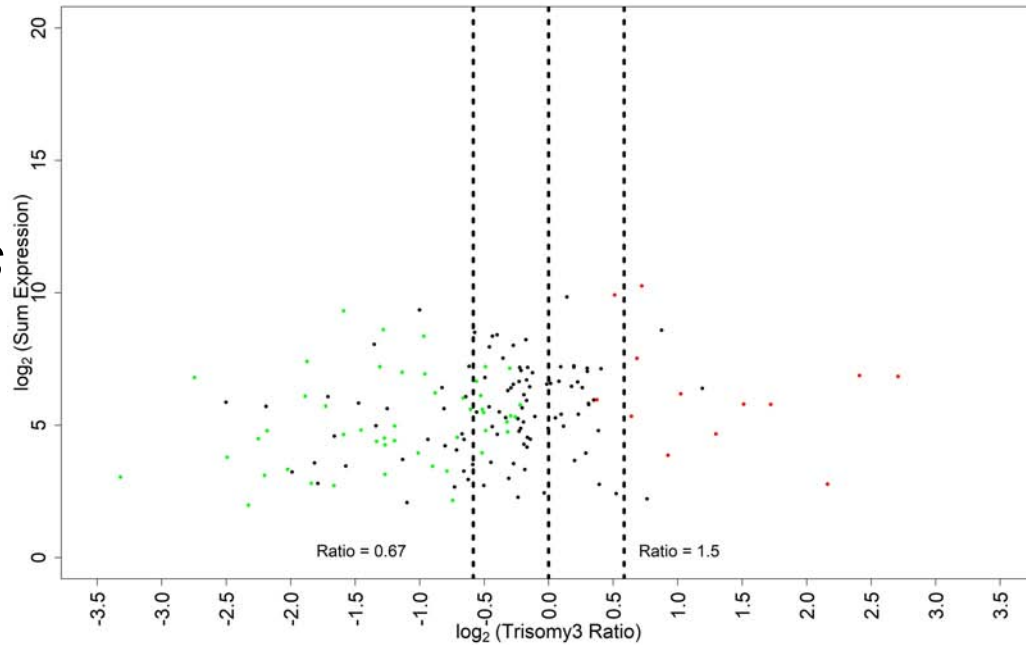

# Trisomy 4: Signal transduction

*cis*

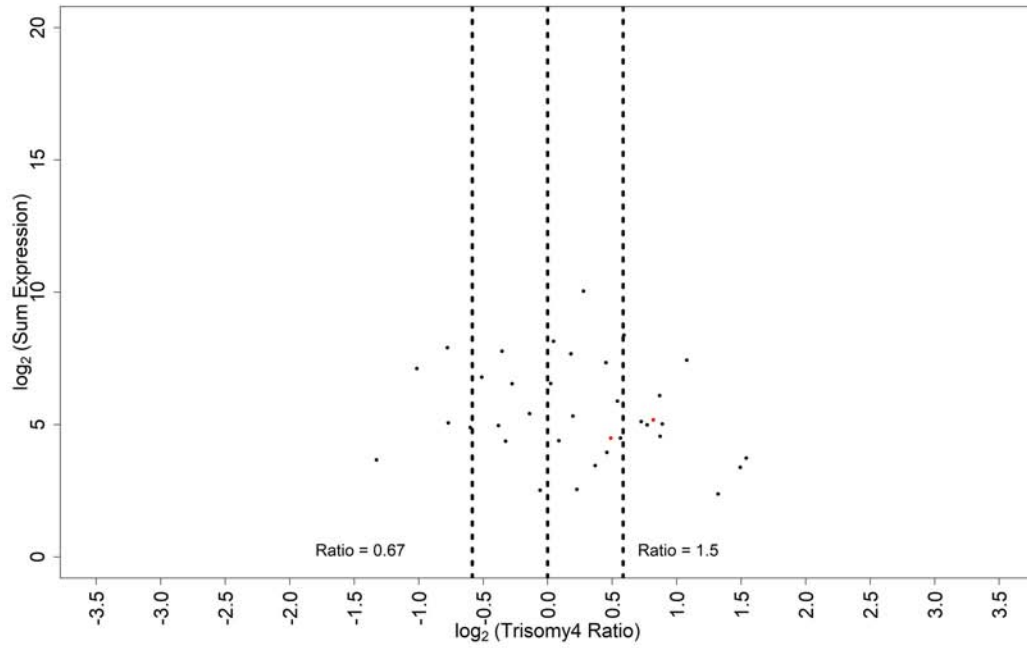

*trans*

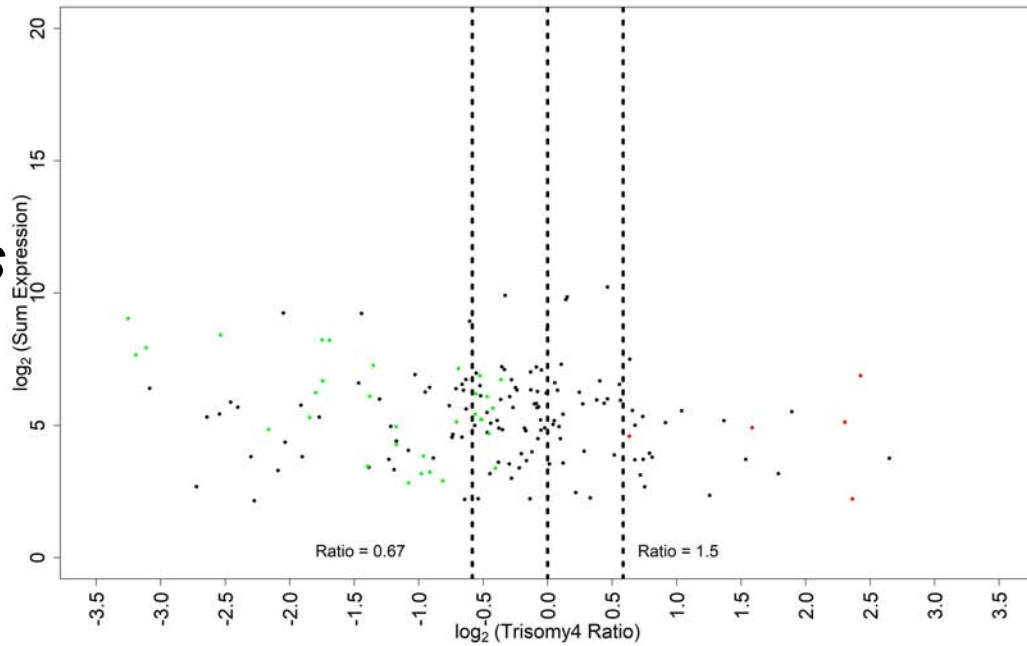



# Trisomy 5: Signal transduction

*cis*

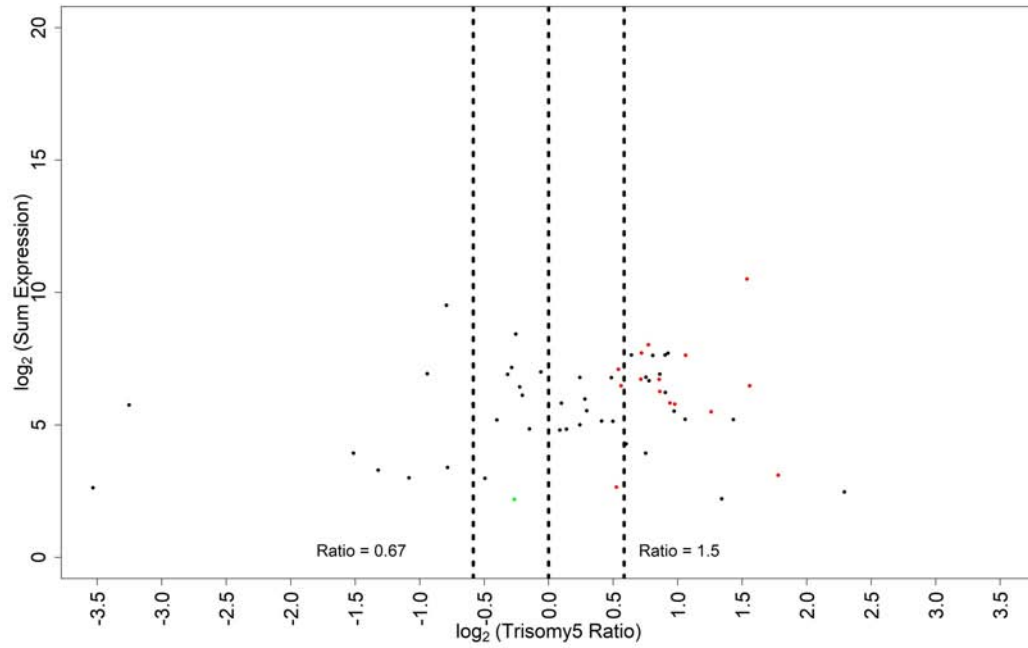

*trans*

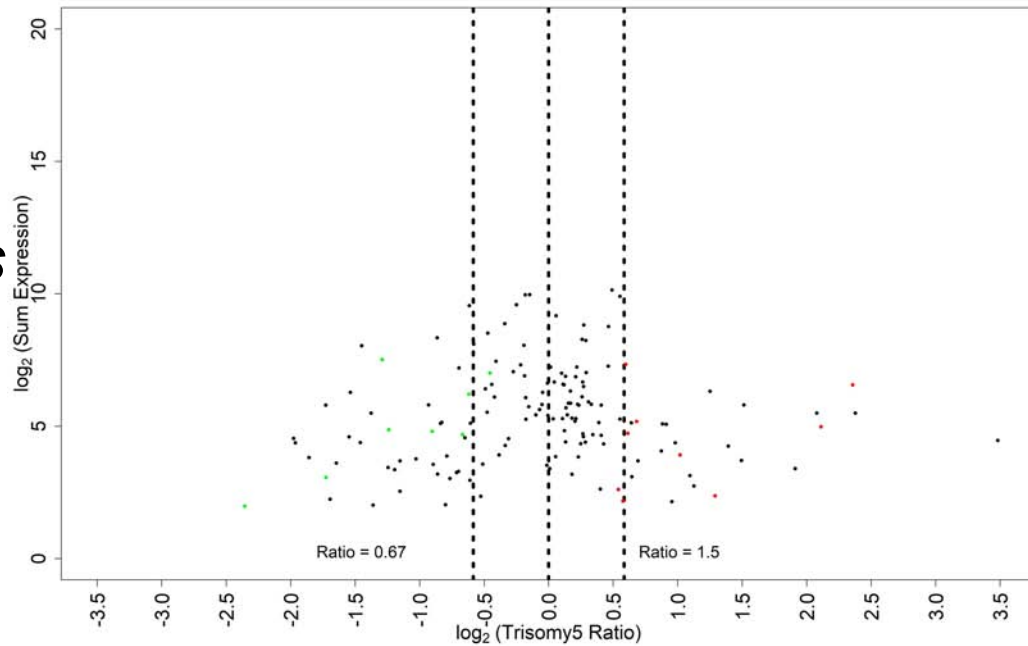

Triploid

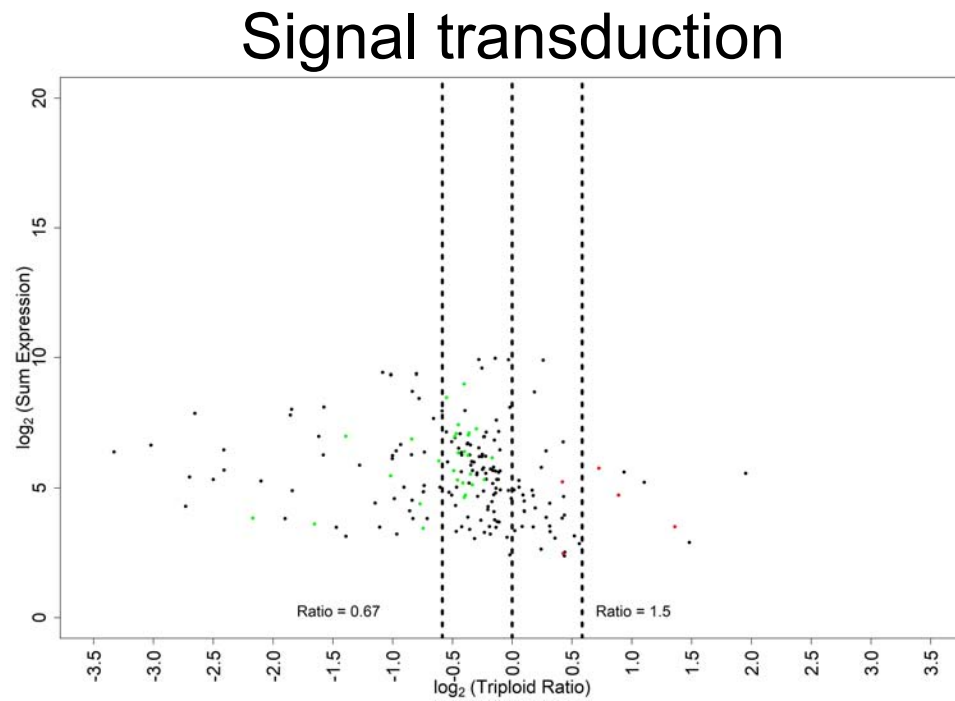

Tetraploid

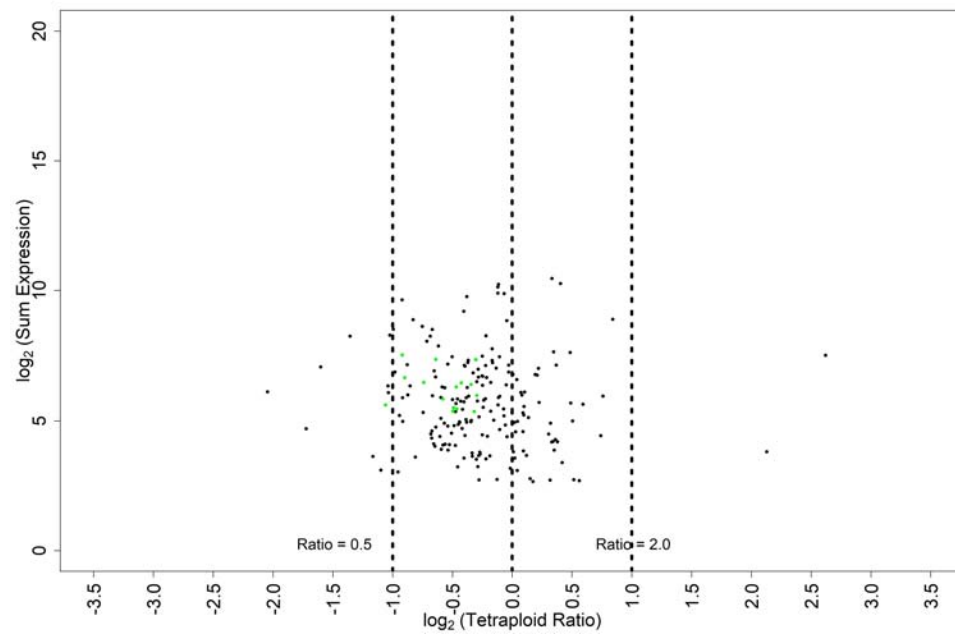

Fig. S7. Scatter plots of significant ratios for the functional class of structural proteins of the ribosome. Plots were generated as described in Fig. S2.

# Trisomy 1: Ribosomal

*cis*

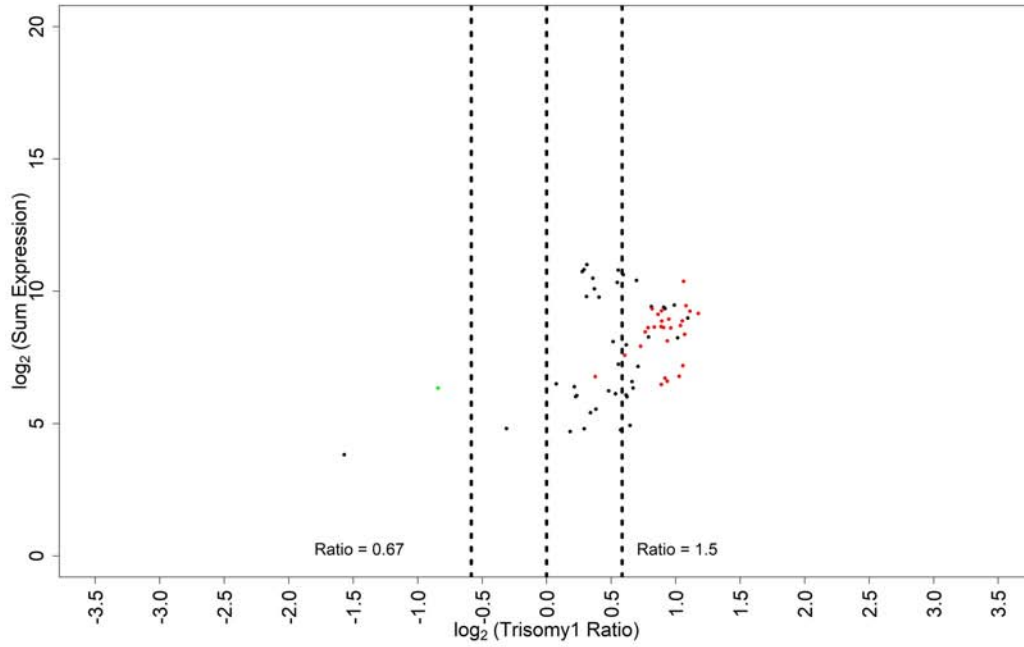

*trans*

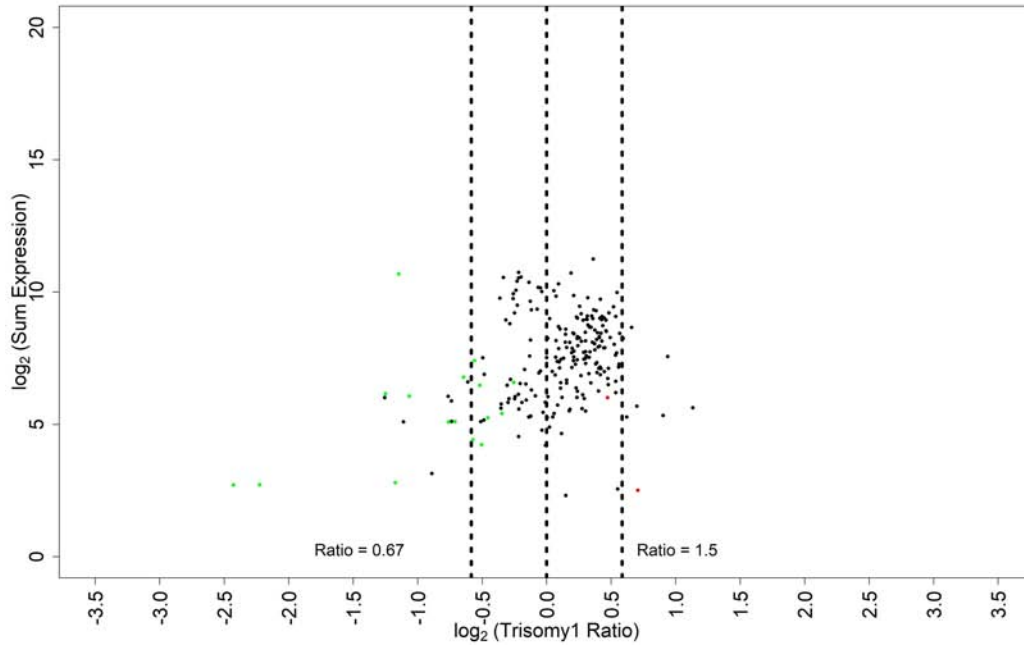

# Trisomy 2: Ribosomal

*cis*

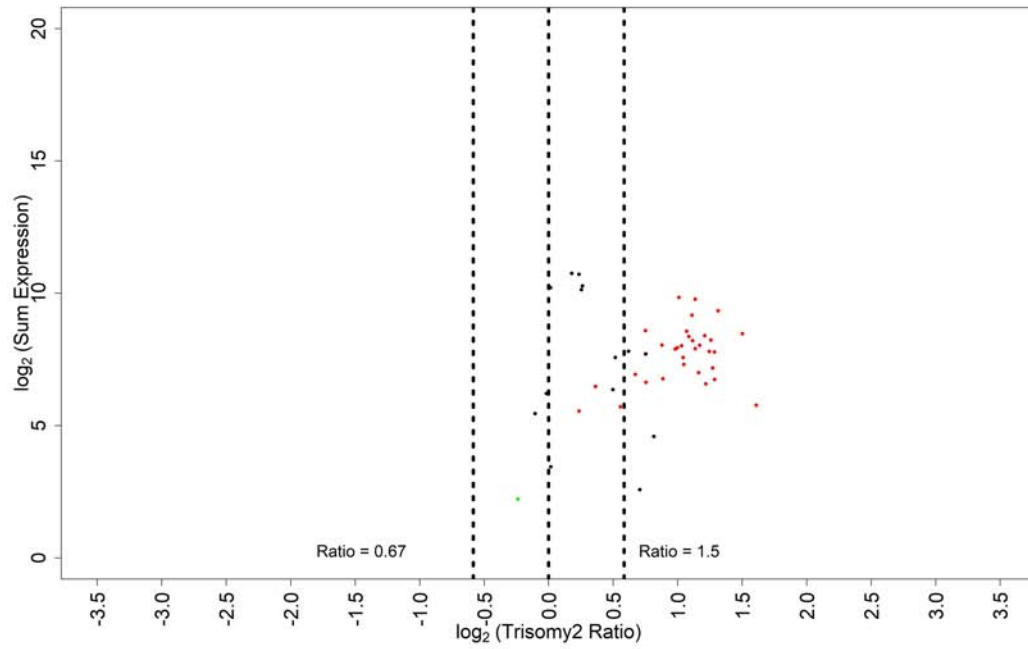

*trans*

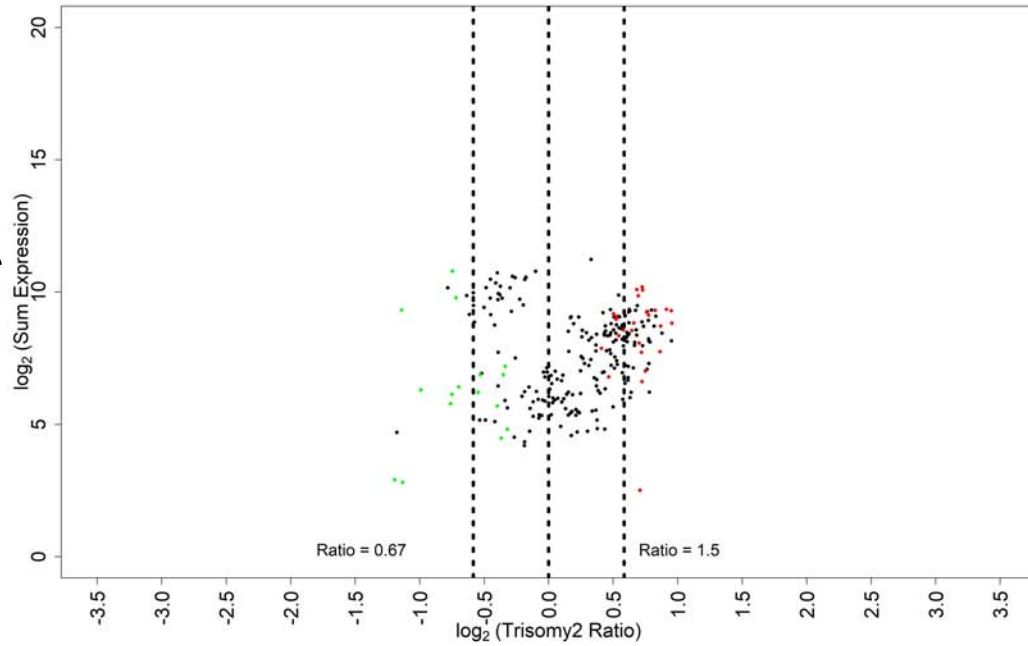

# Trisomy 3: Ribosomal

*cis*

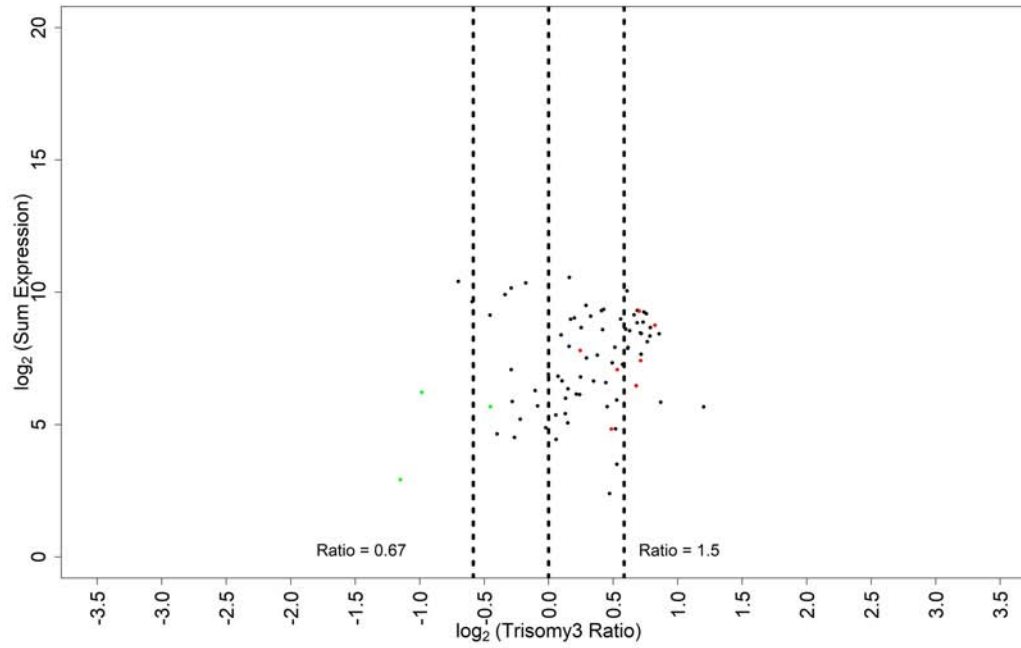

*trans*

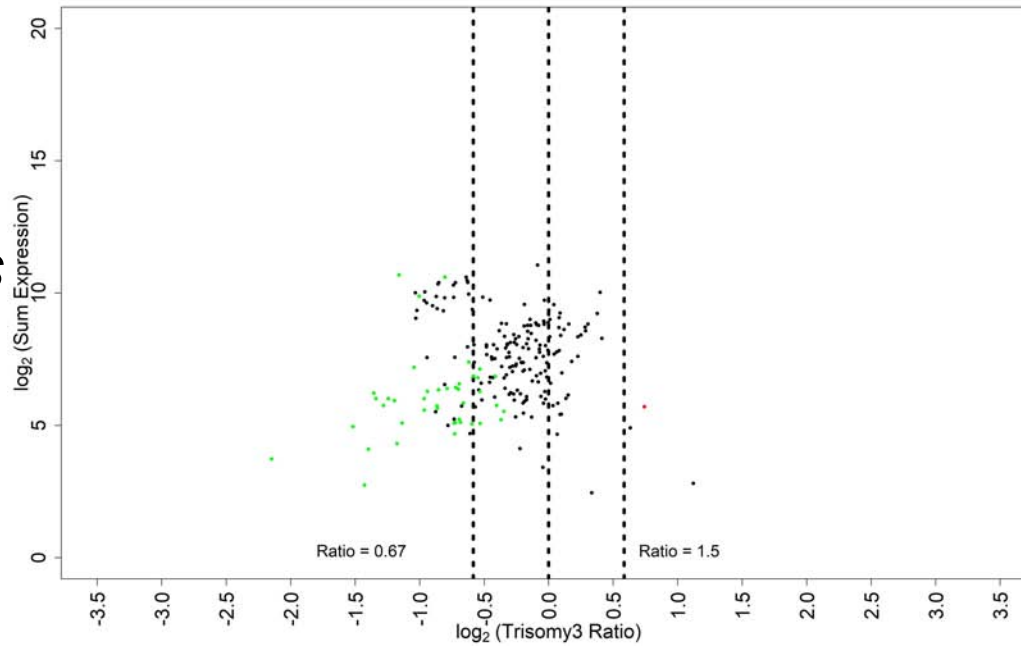

# Trisomy 4: Ribosomal

*cis*

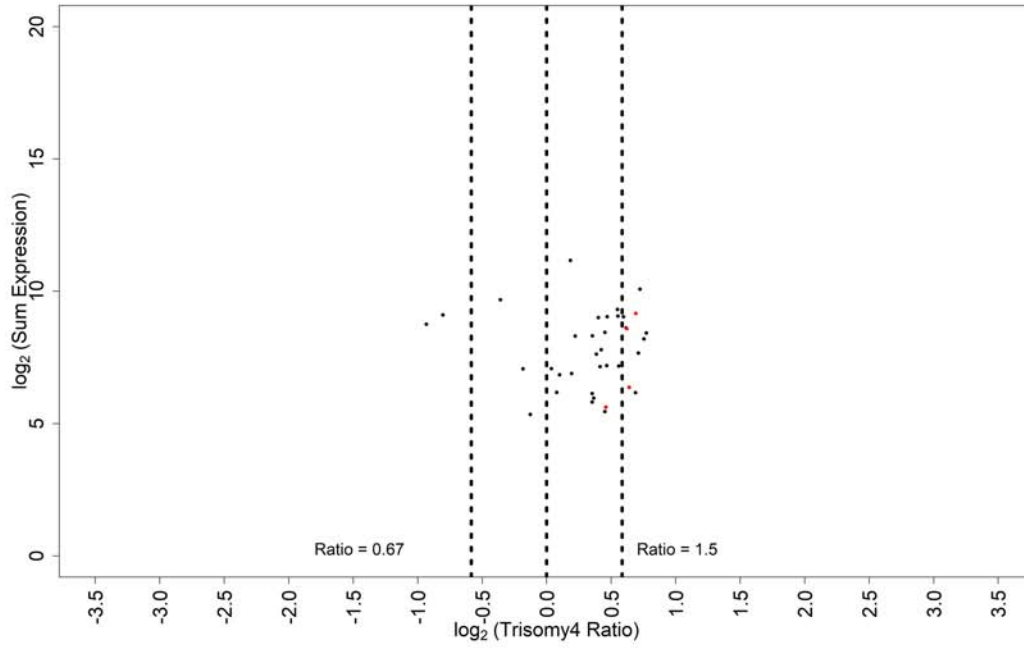

*trans*

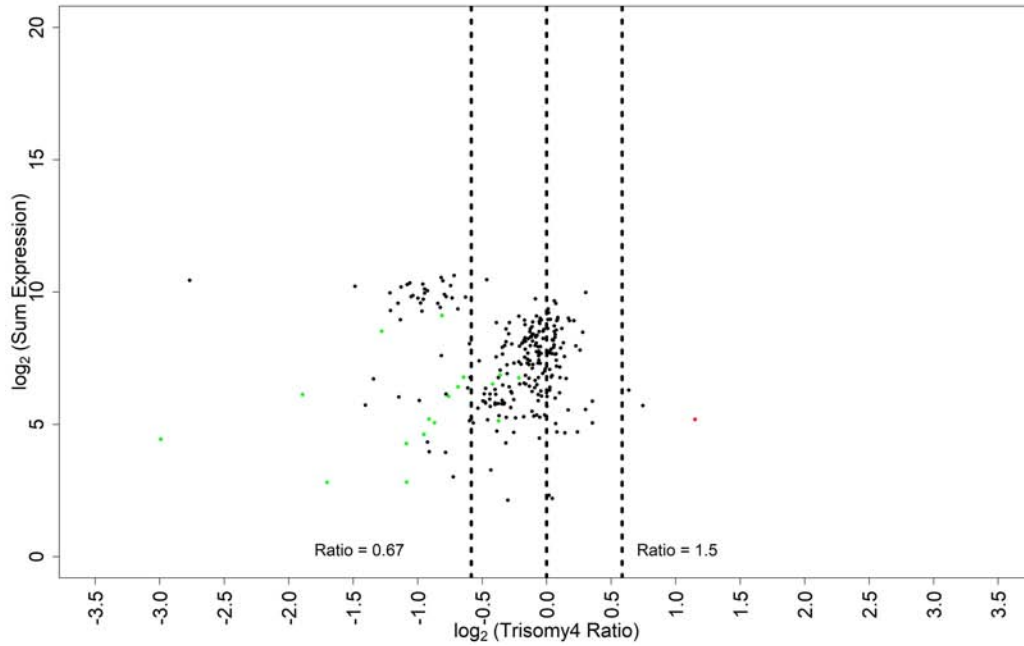

# Trisomy 5: Ribosomal

*cis*

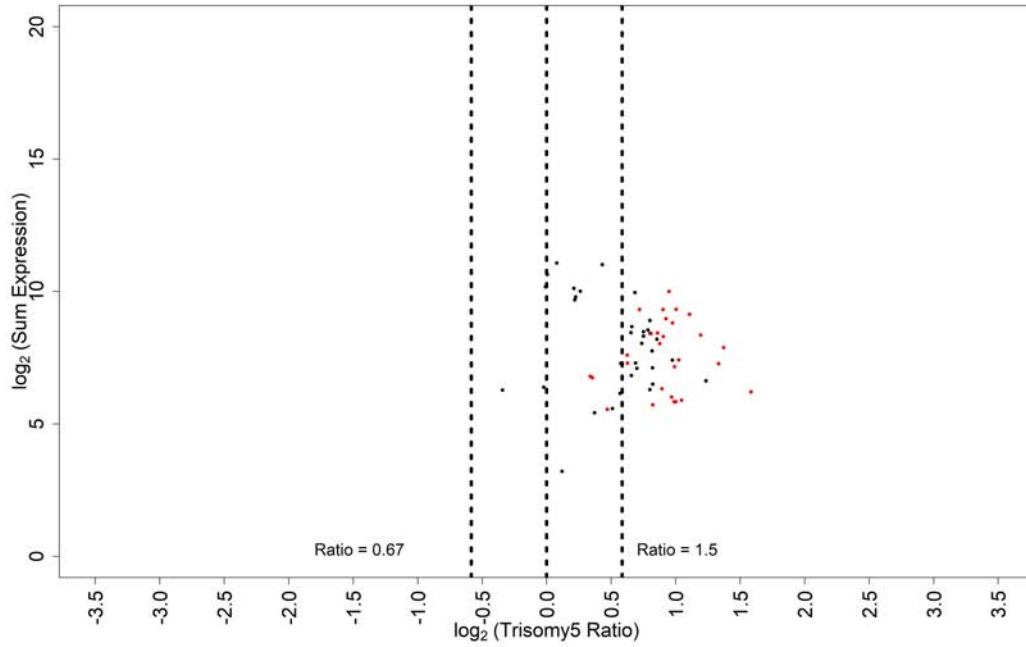

*trans*

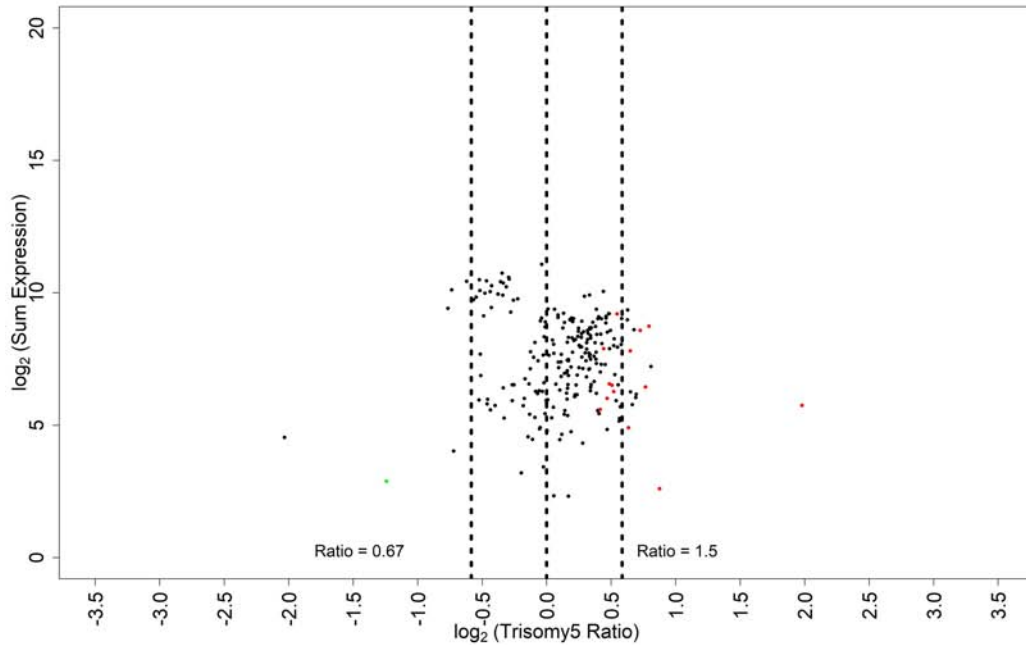



Triploid

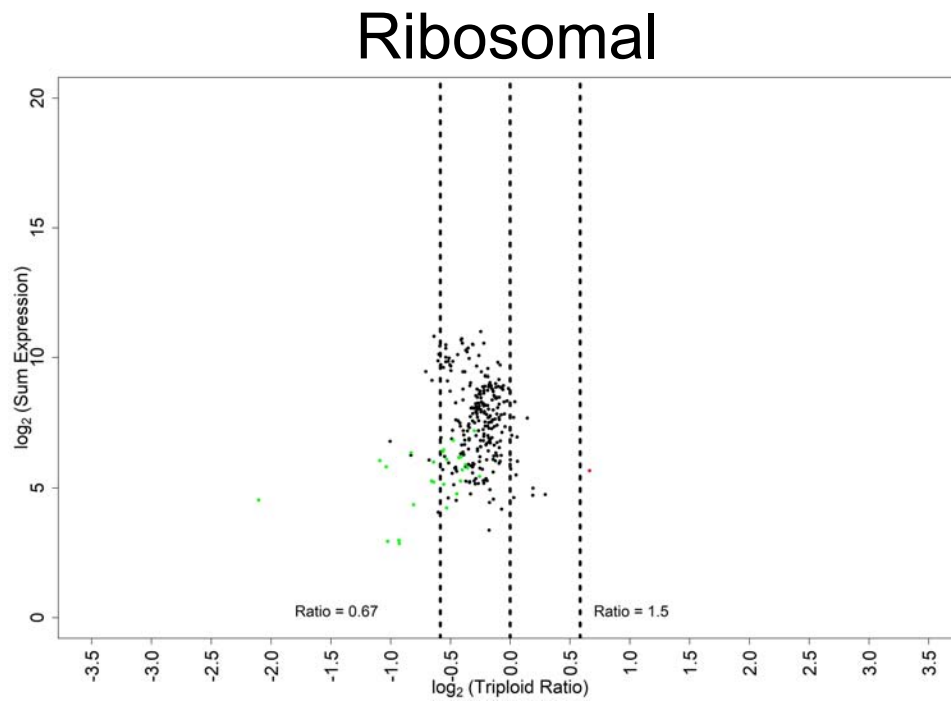

Tetraploid

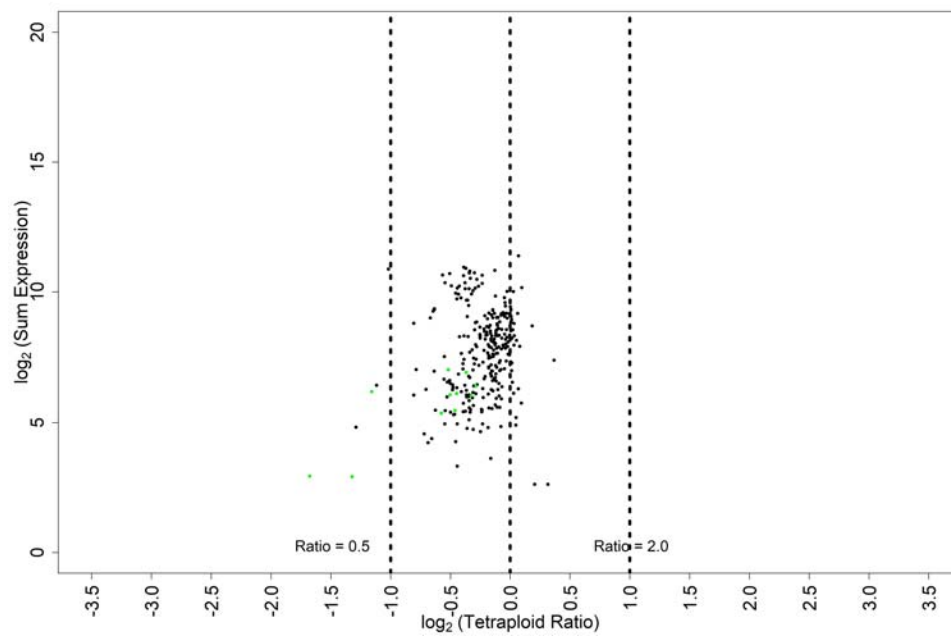

Fig. S8. Ratio distributions and scatter plots for the functional class of proteasome. Distributions were generated as described in Fig. 1 and scatter plots as described in Fig. S2.

# Trisomy 1: Proteasome

*cis*

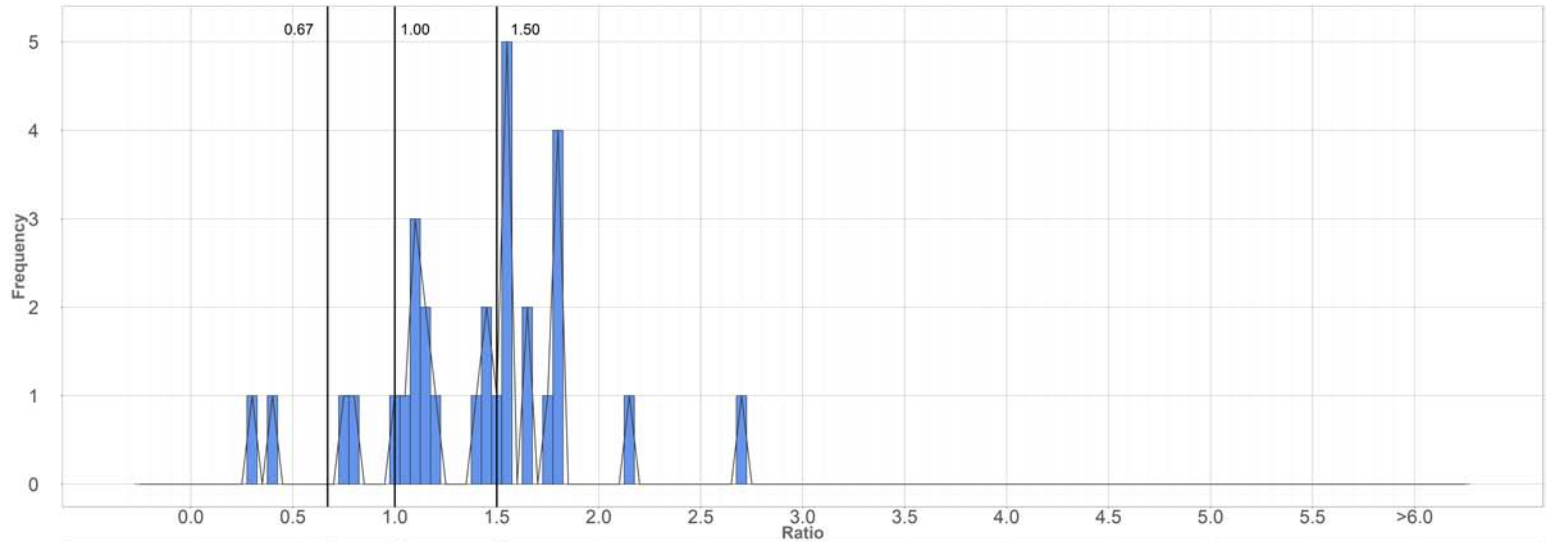

*trans*

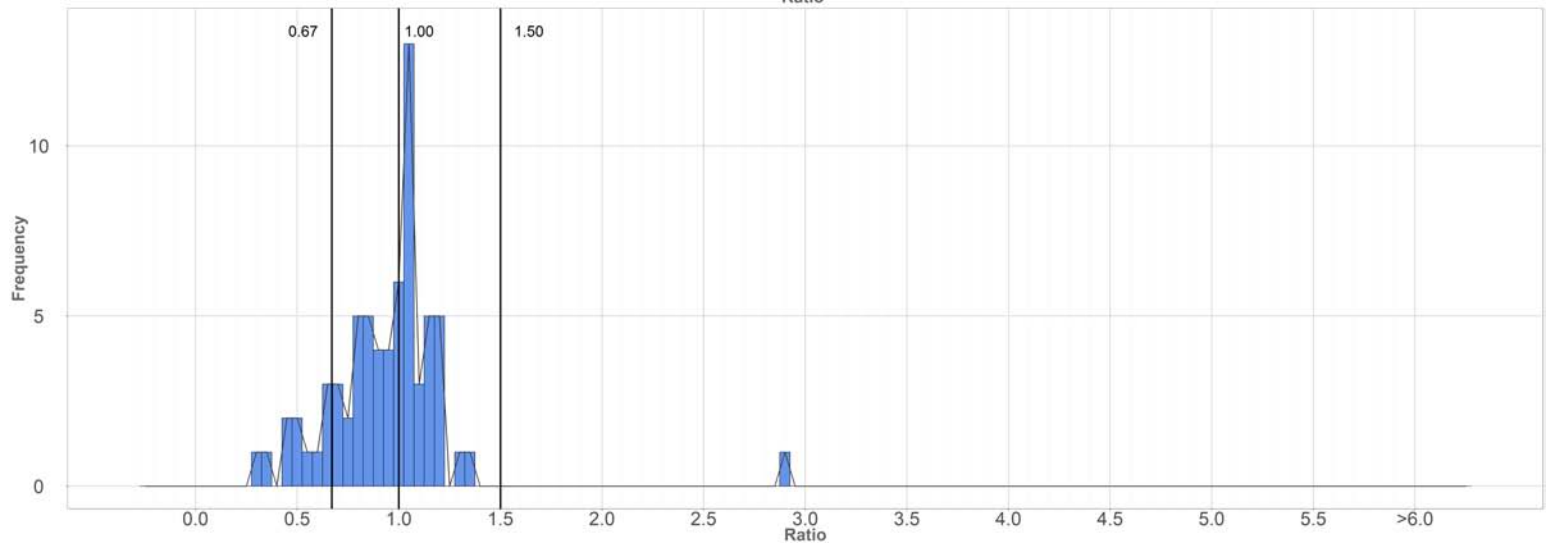

# Trisomy 2: Proteasome

*cis*

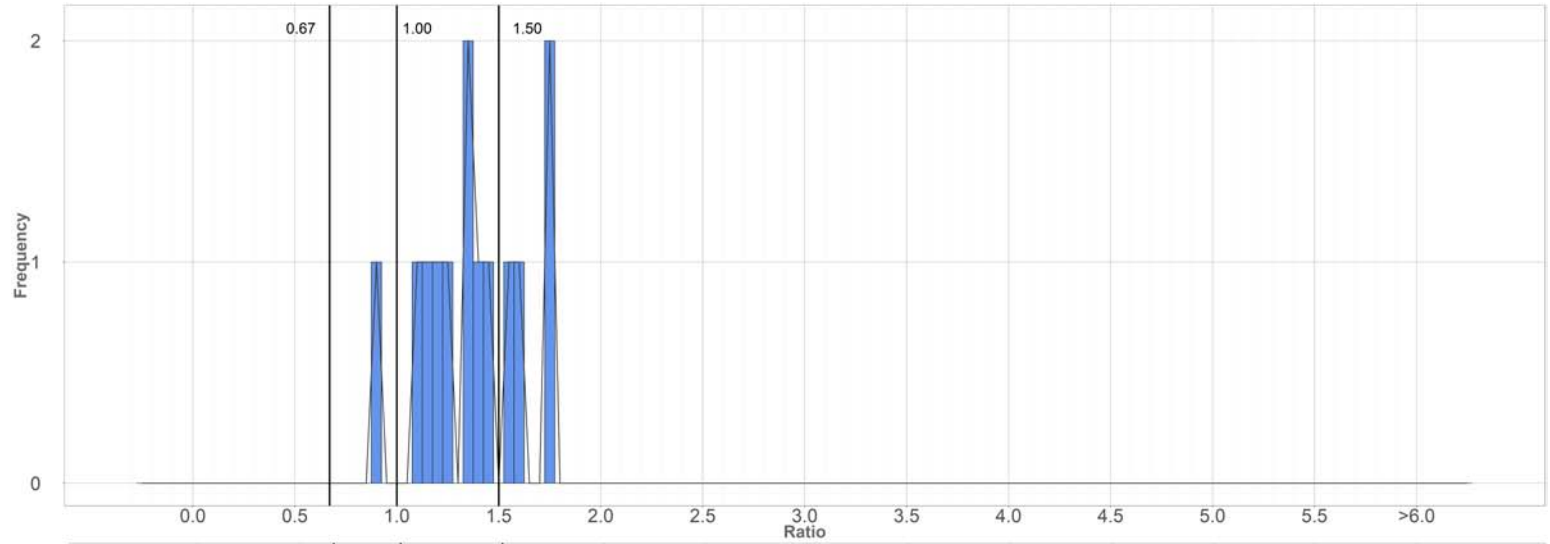

*trans*

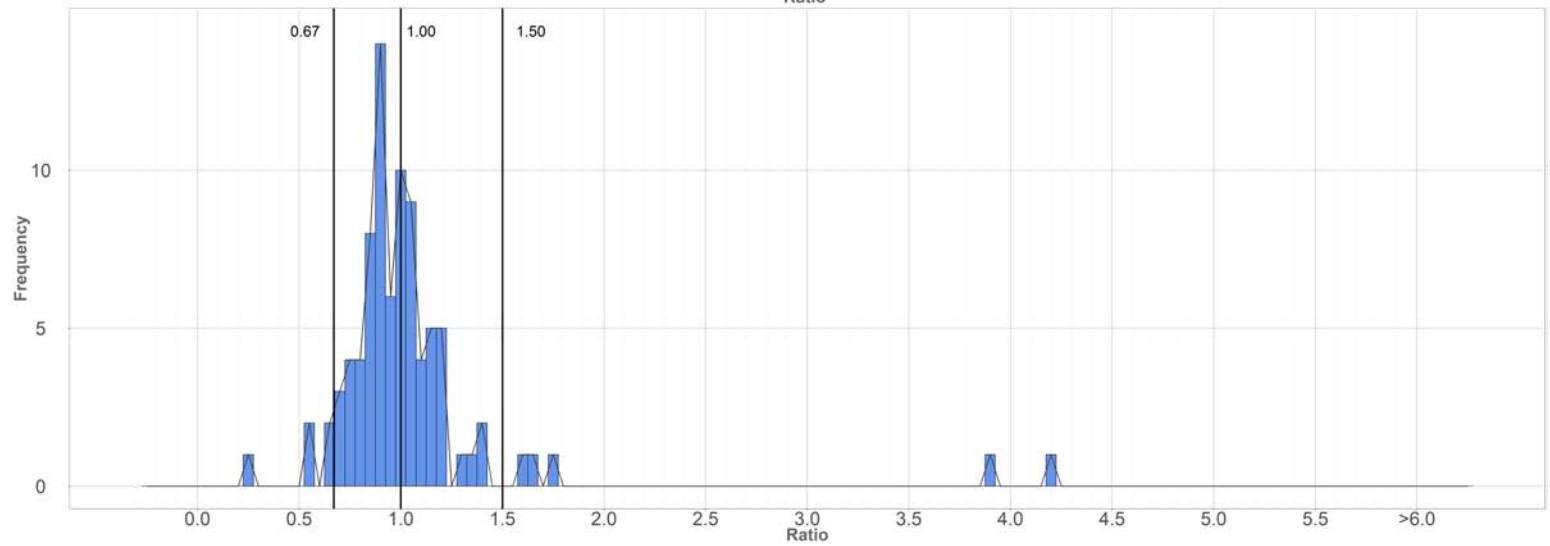

# Trisomy 3: Proteasome

*cis*

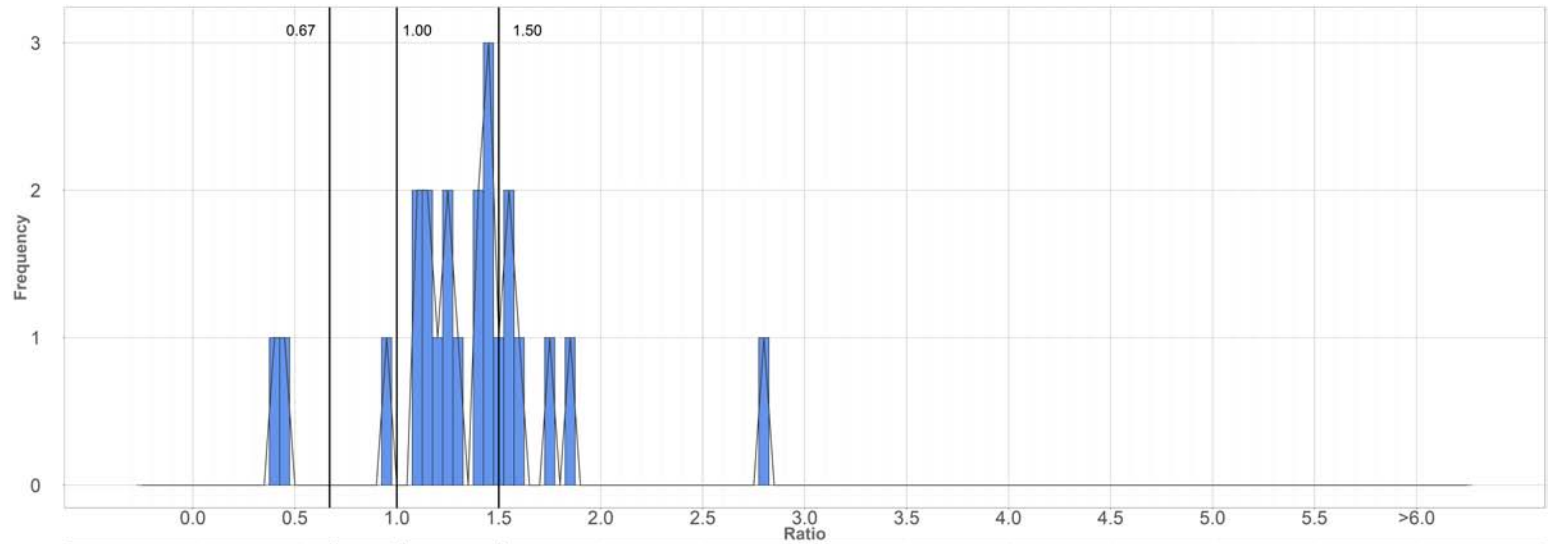

*trans*

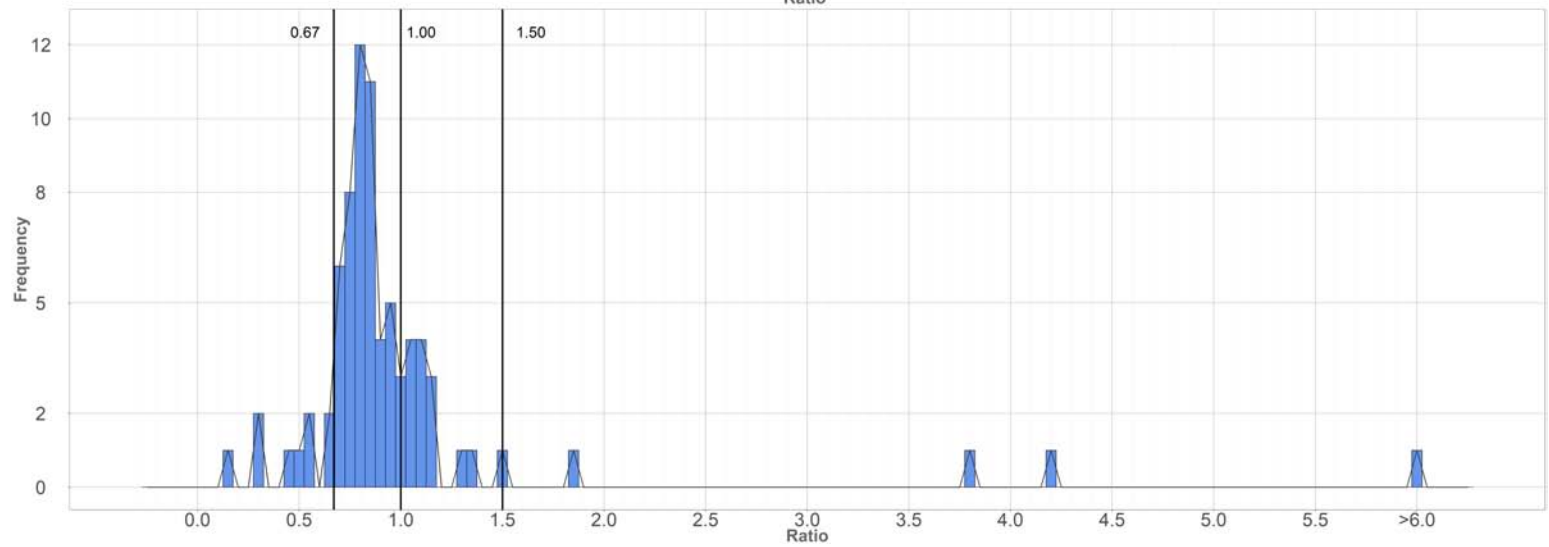

# Trisomy 4: Proteasome

*cis*

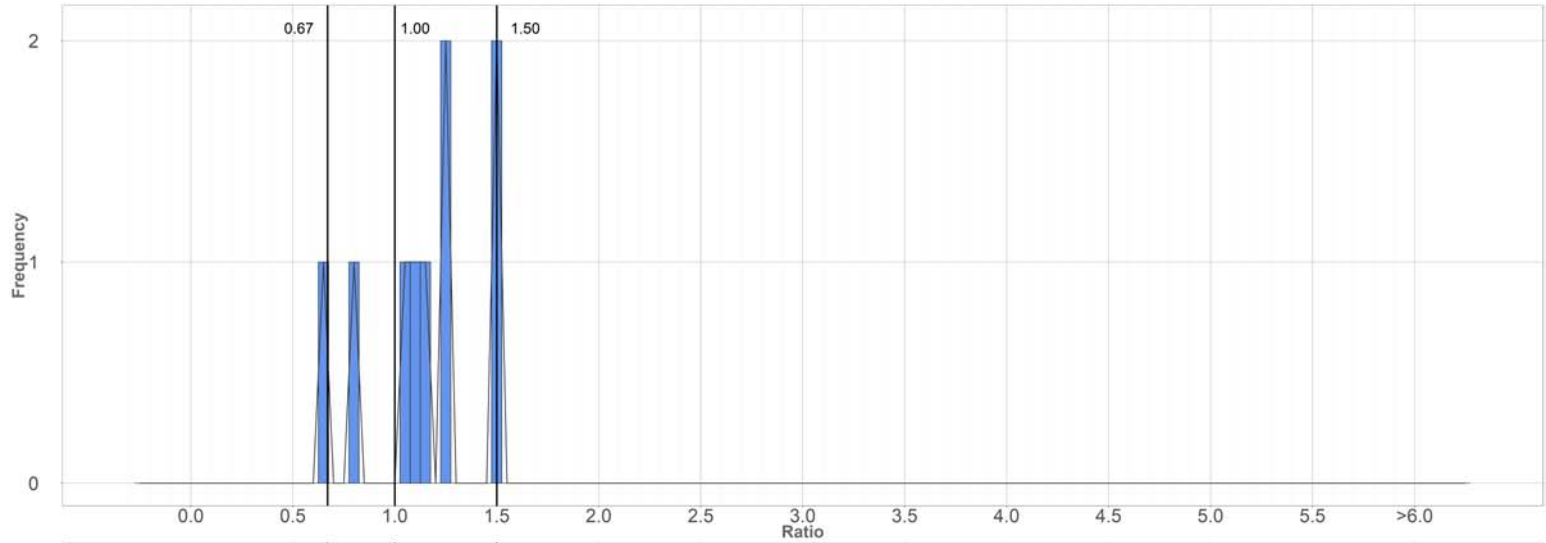

*trans*

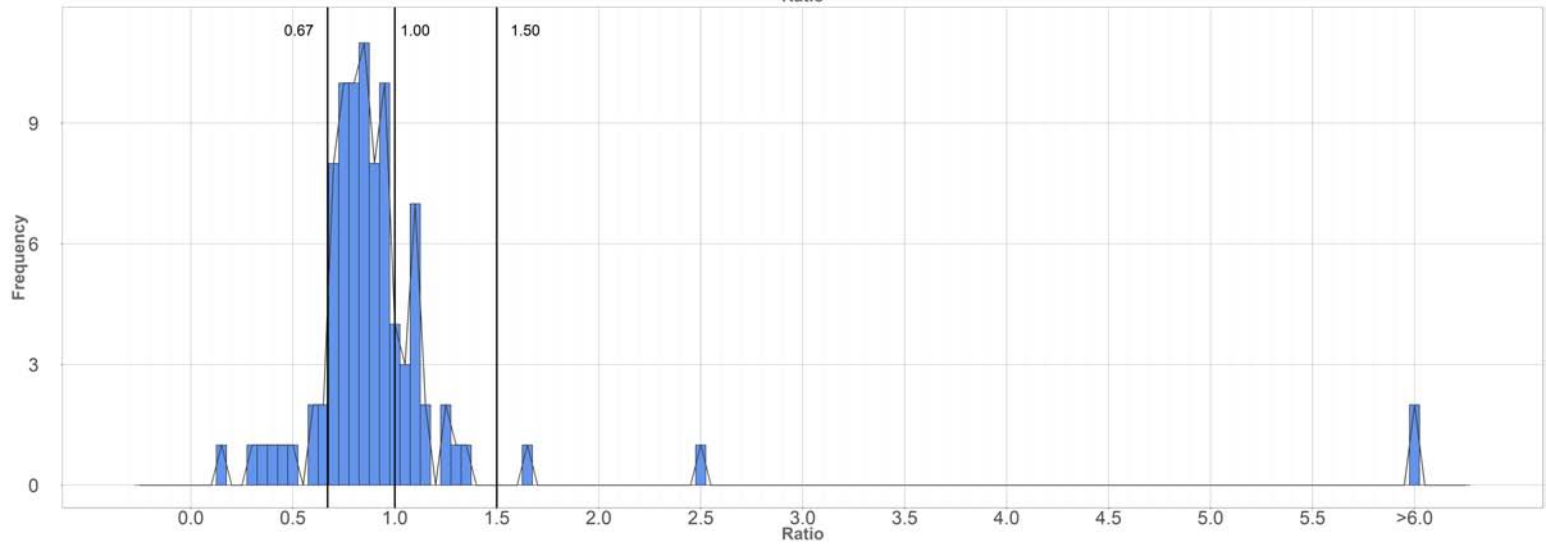

# Trisomy 5: Proteasome

*cis*

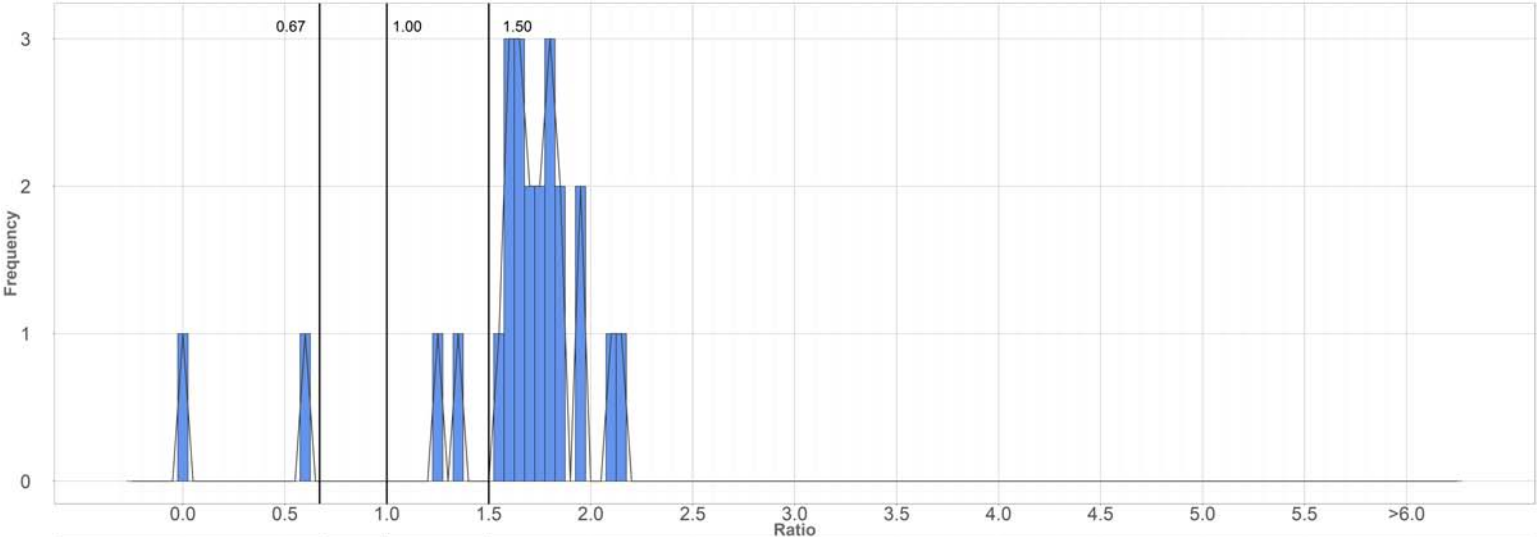

*trans*

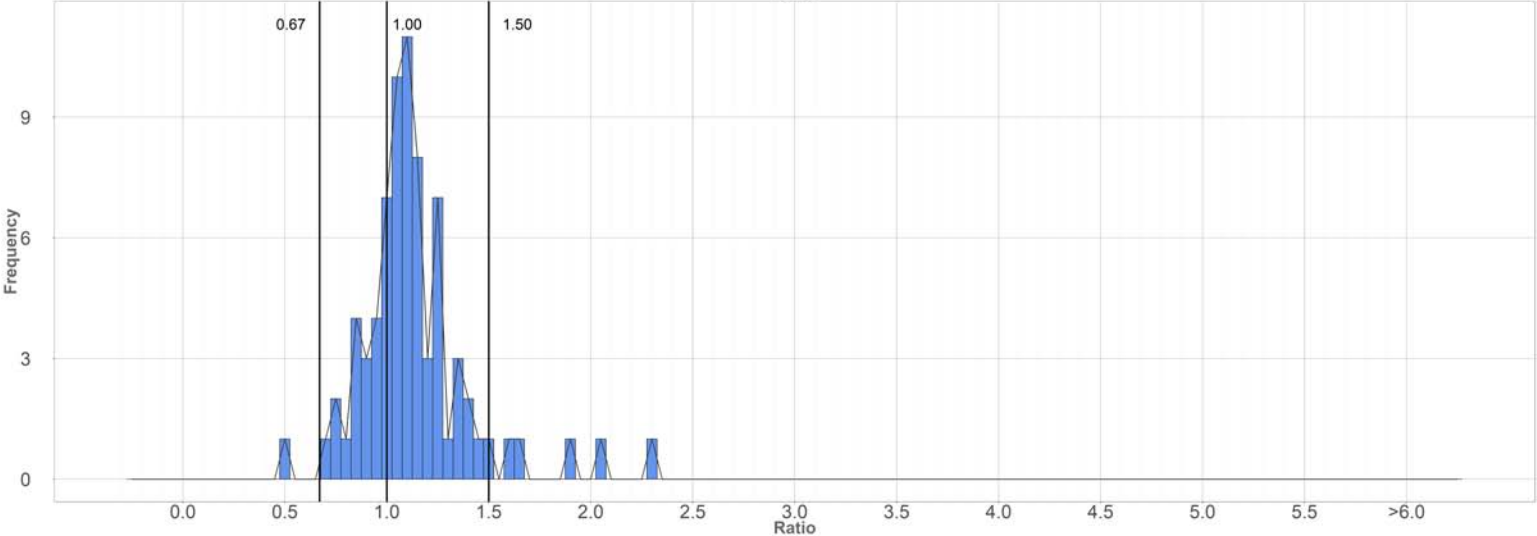

# Proteasome

Triploid

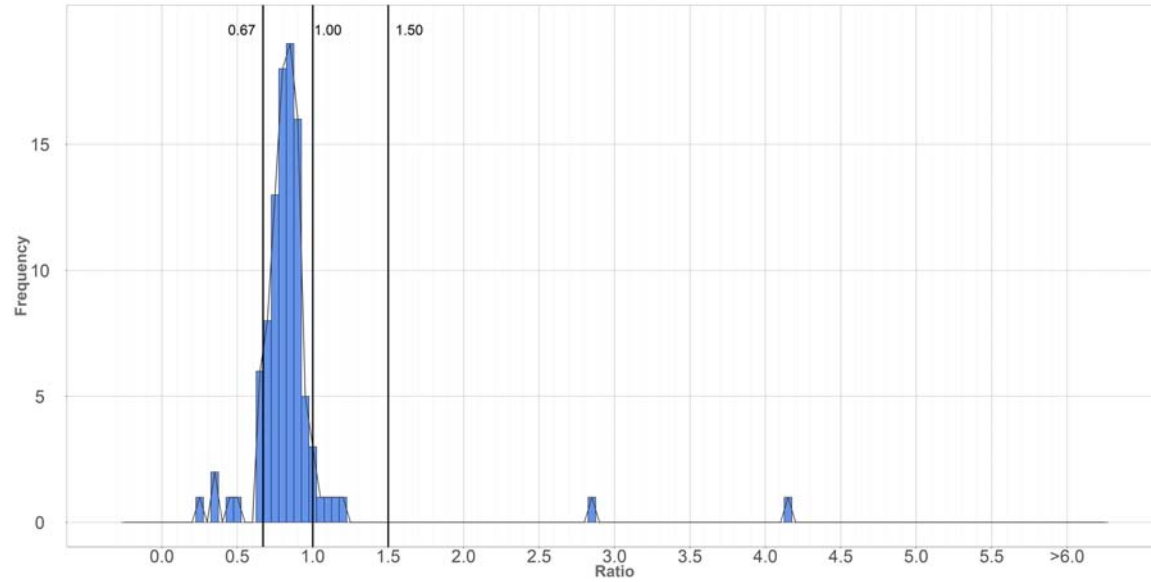

Tetraploid

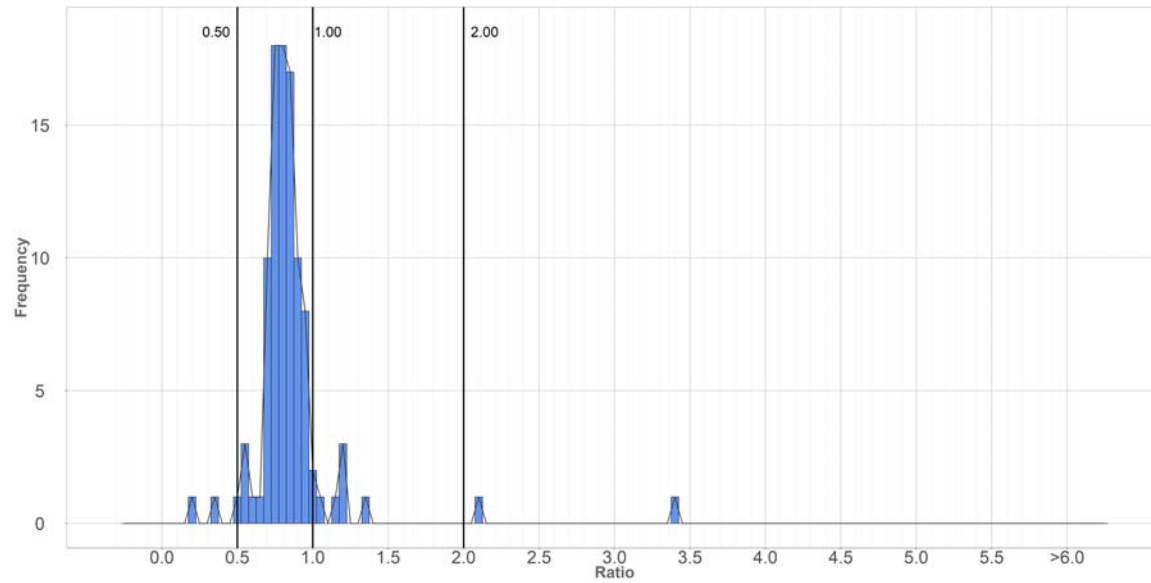



# Trisomy 1: Proteasome

*cis*

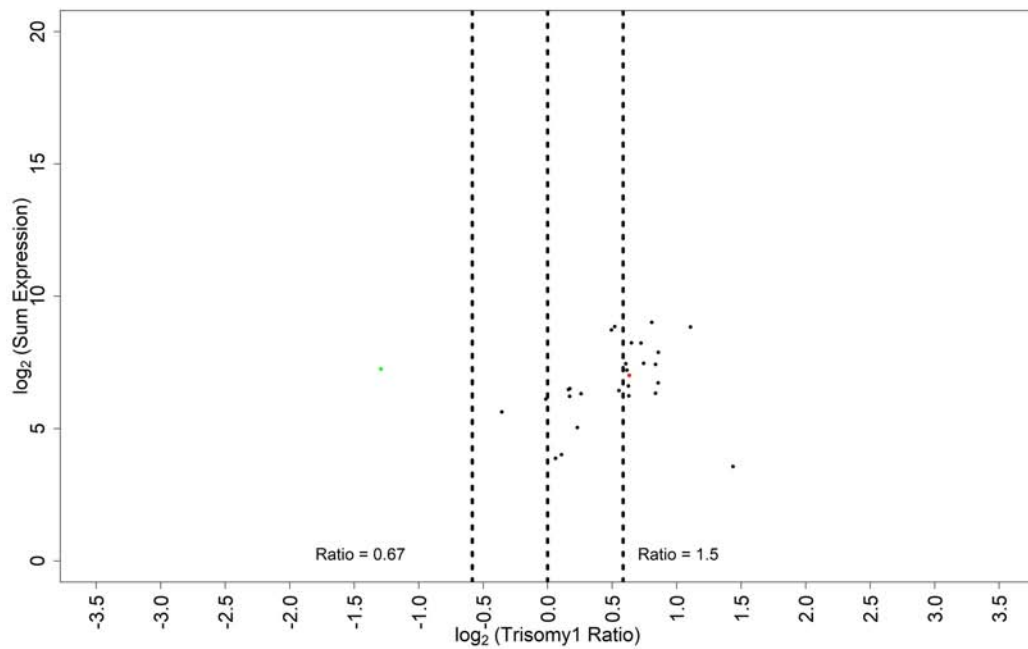

*trans*

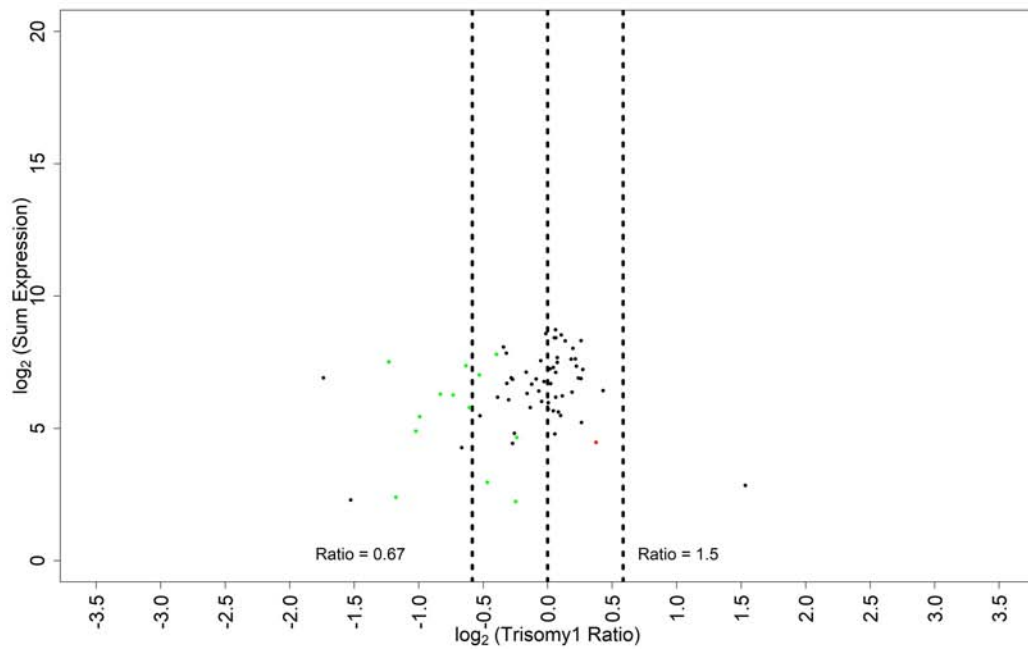

# Trisomy 2: Proteasome

*cis*

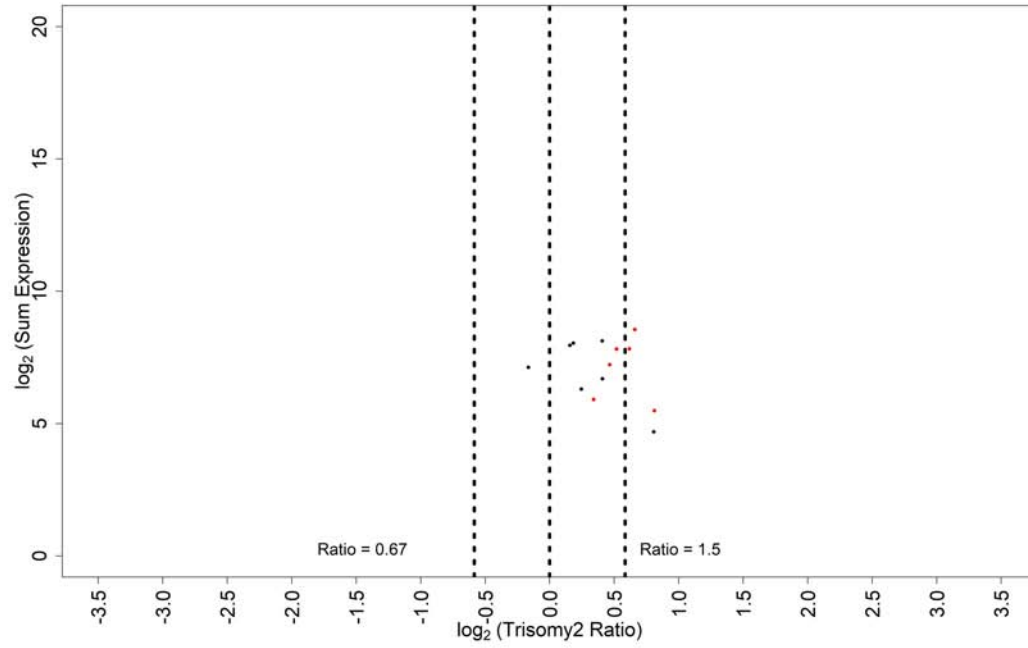

*trans*

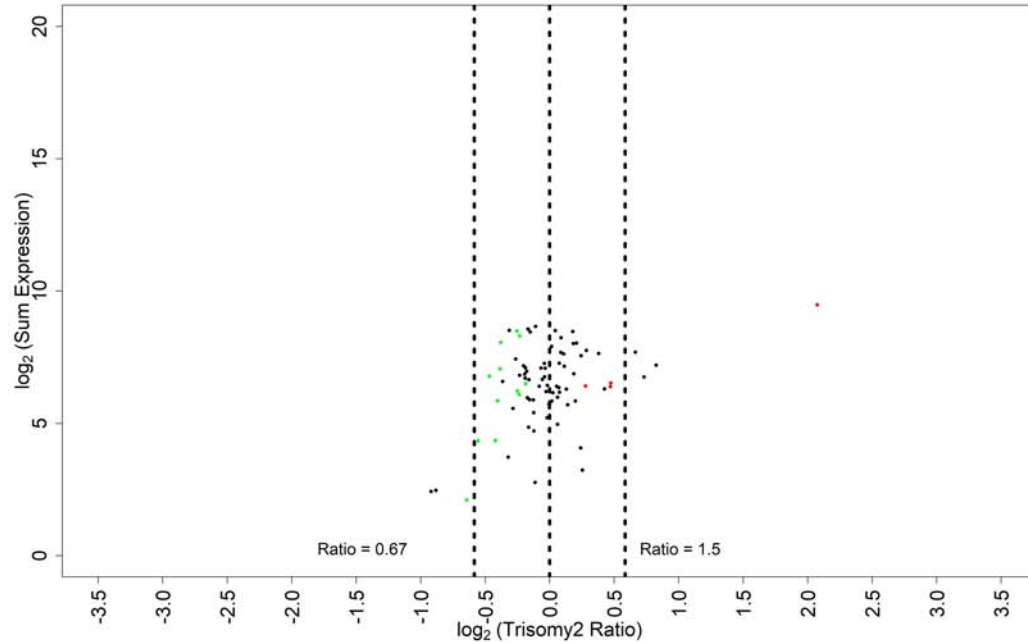

# Trisomy 3: Proteasome

*cis*

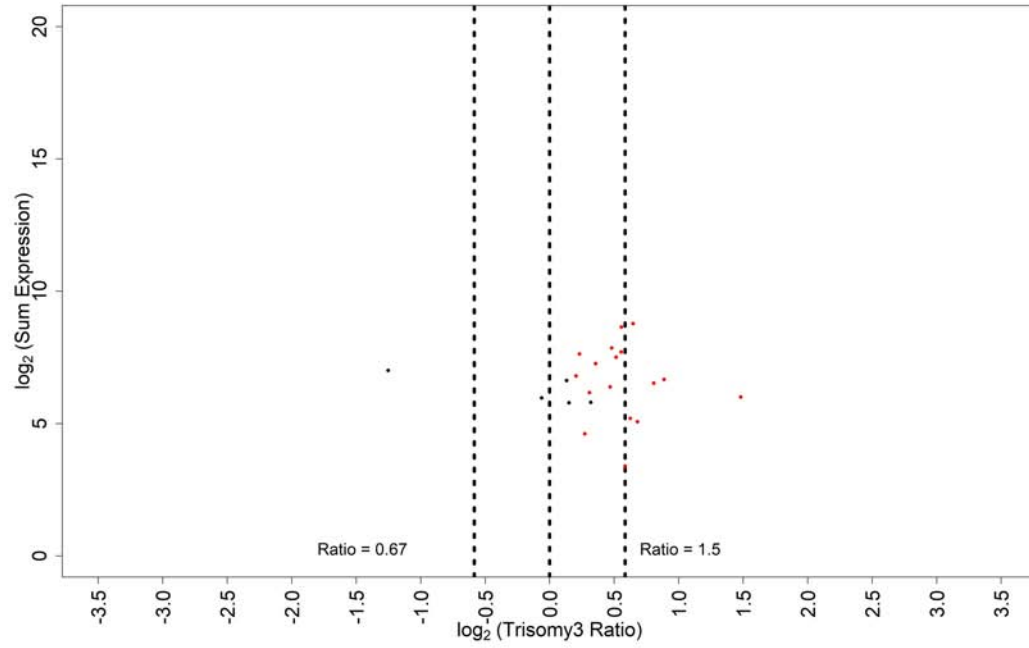

*trans*

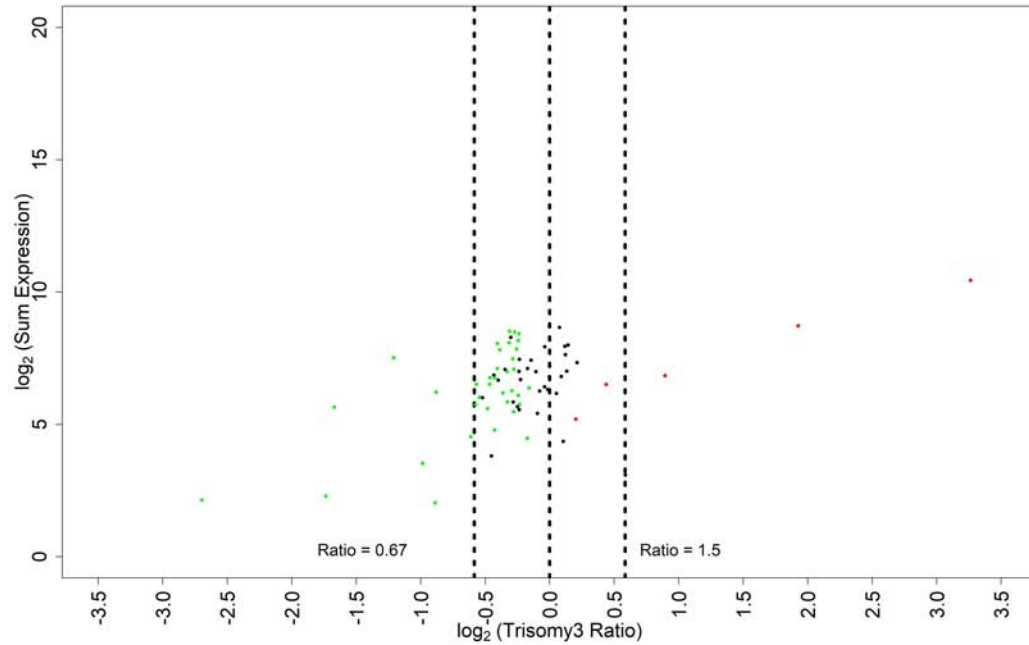

# Trisomy 4: Proteasome

*cis*

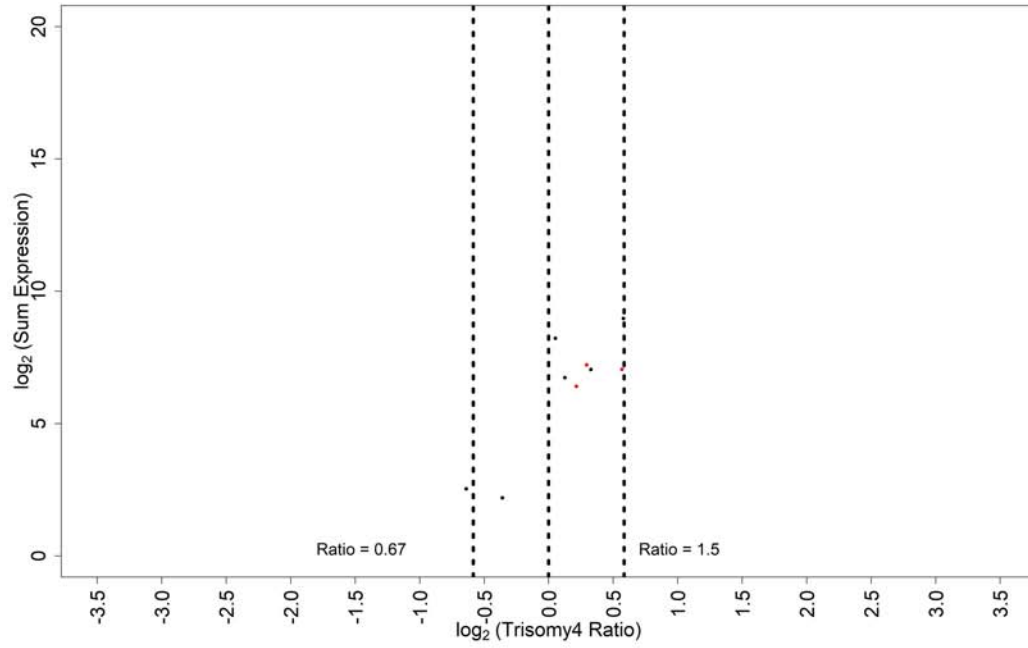

*trans*

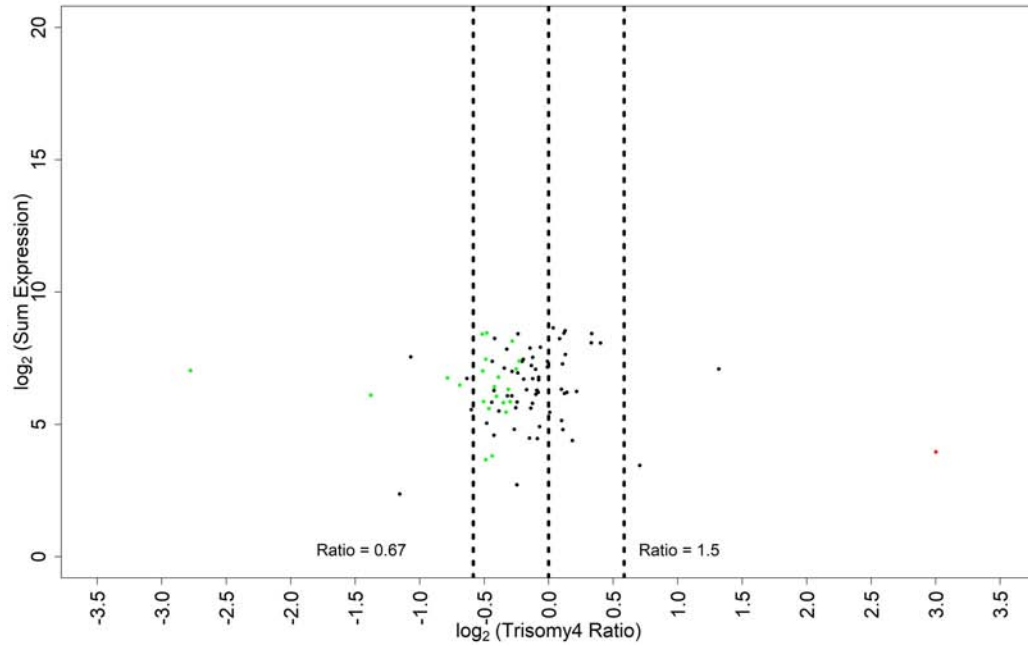

# Trisomy 5: Proteasome

*cis*

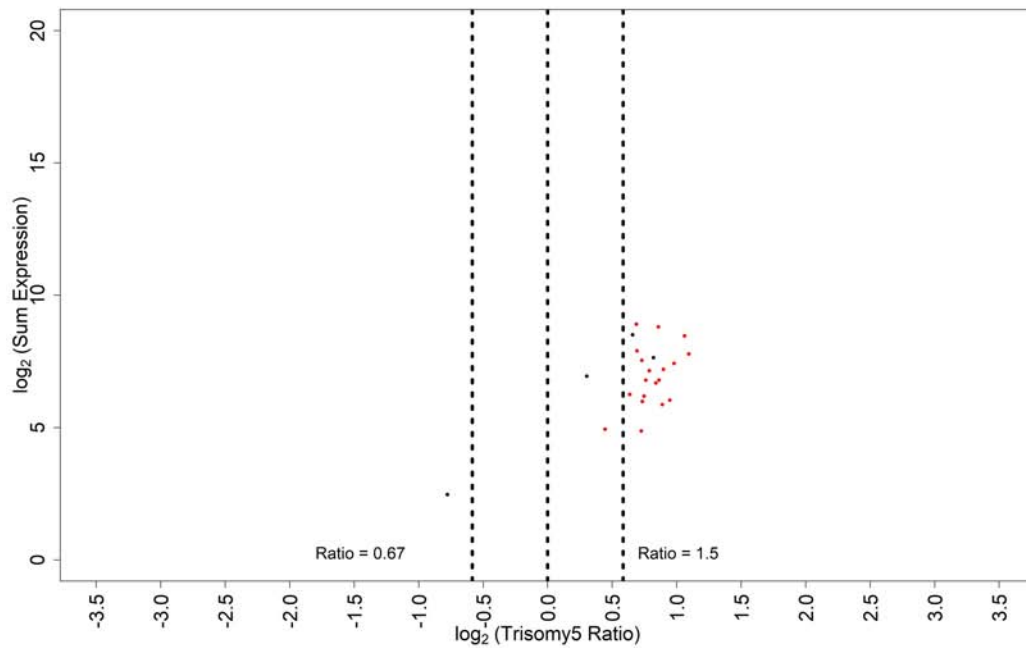

*trans*

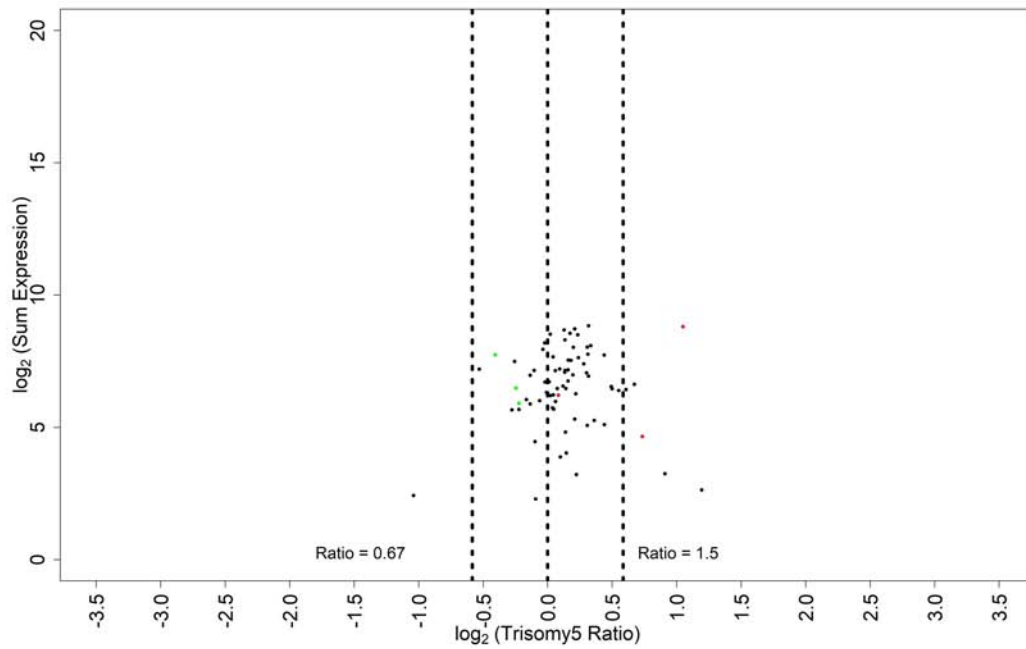

Triploid

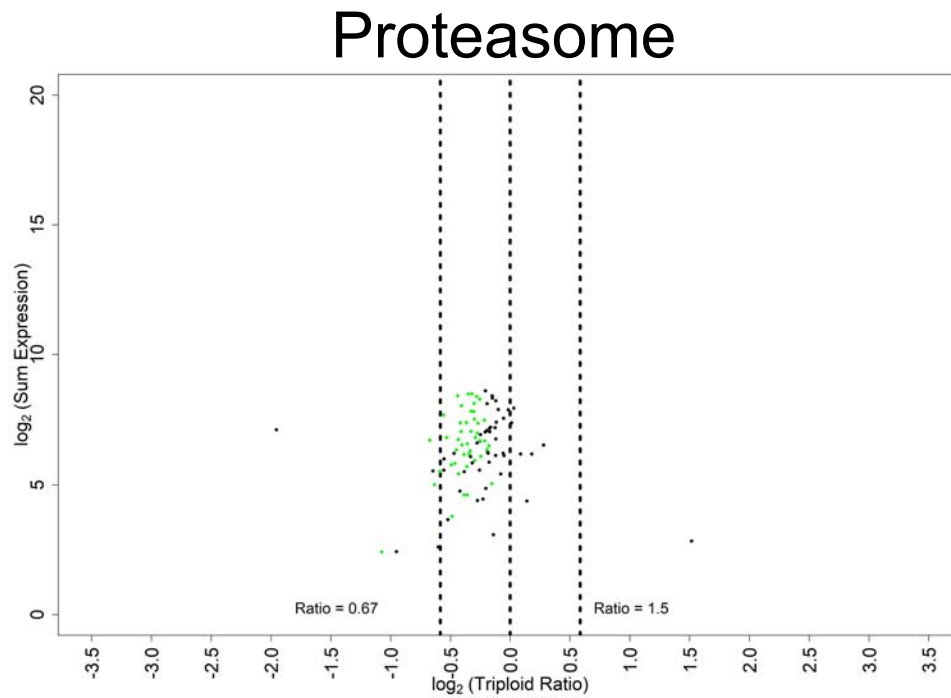

Tetraploid

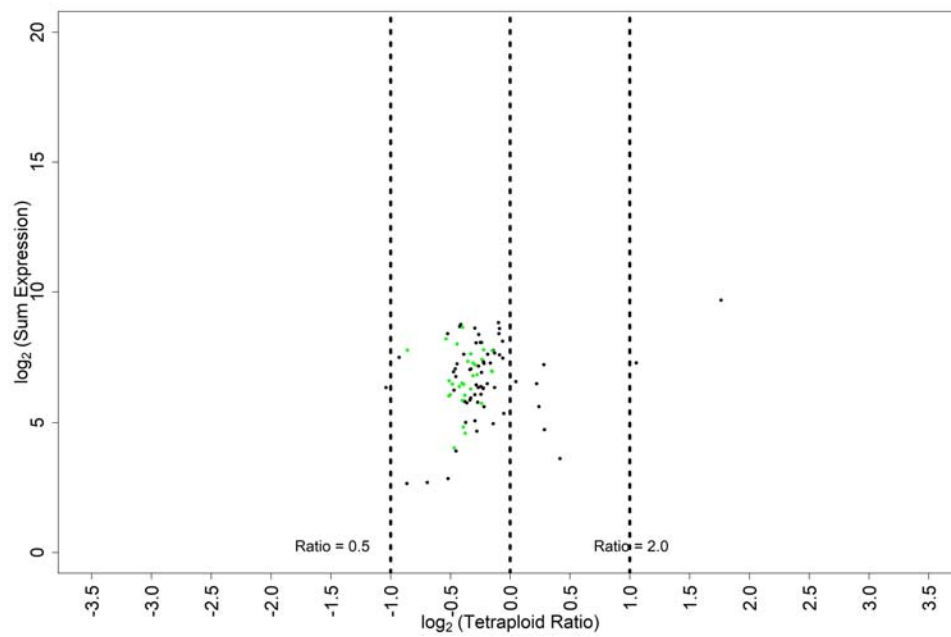

Fig. S9. Ratio distributions and scatter plots for the functional class of stress-related genes. Distributions were generated as described in Fig. 1 and scatter plots as described in Fig. S2.

# Trisomy 1: Stress-related

*cis*

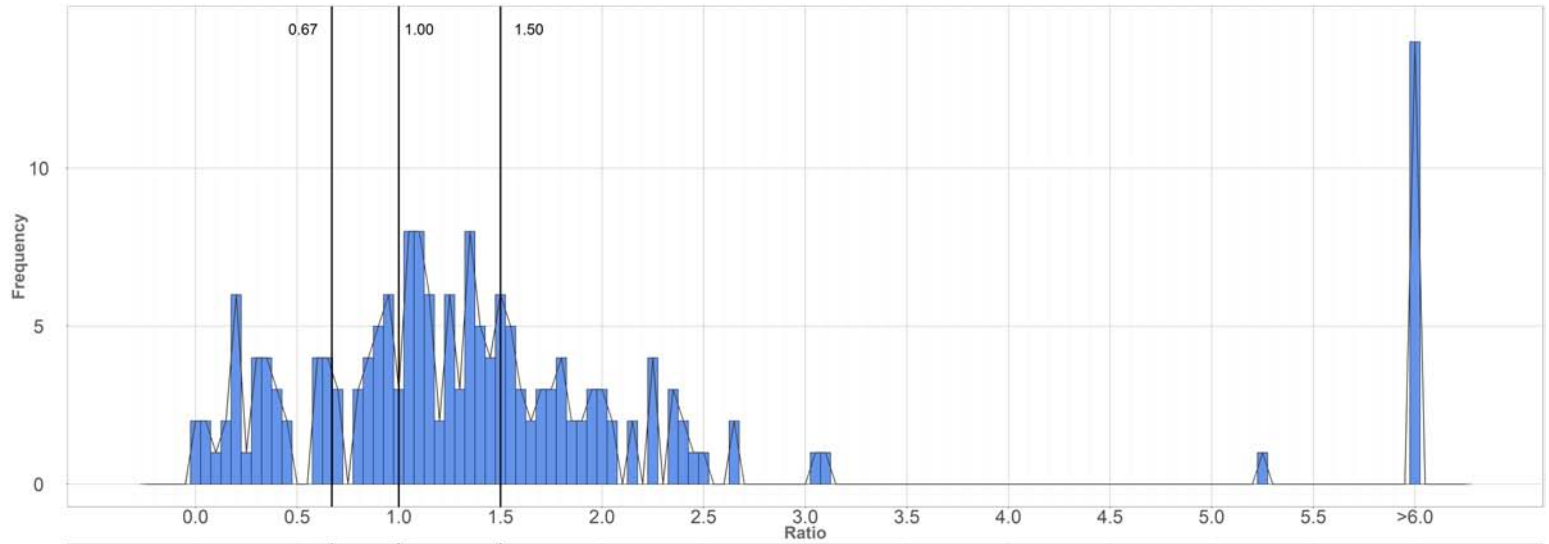

*trans*

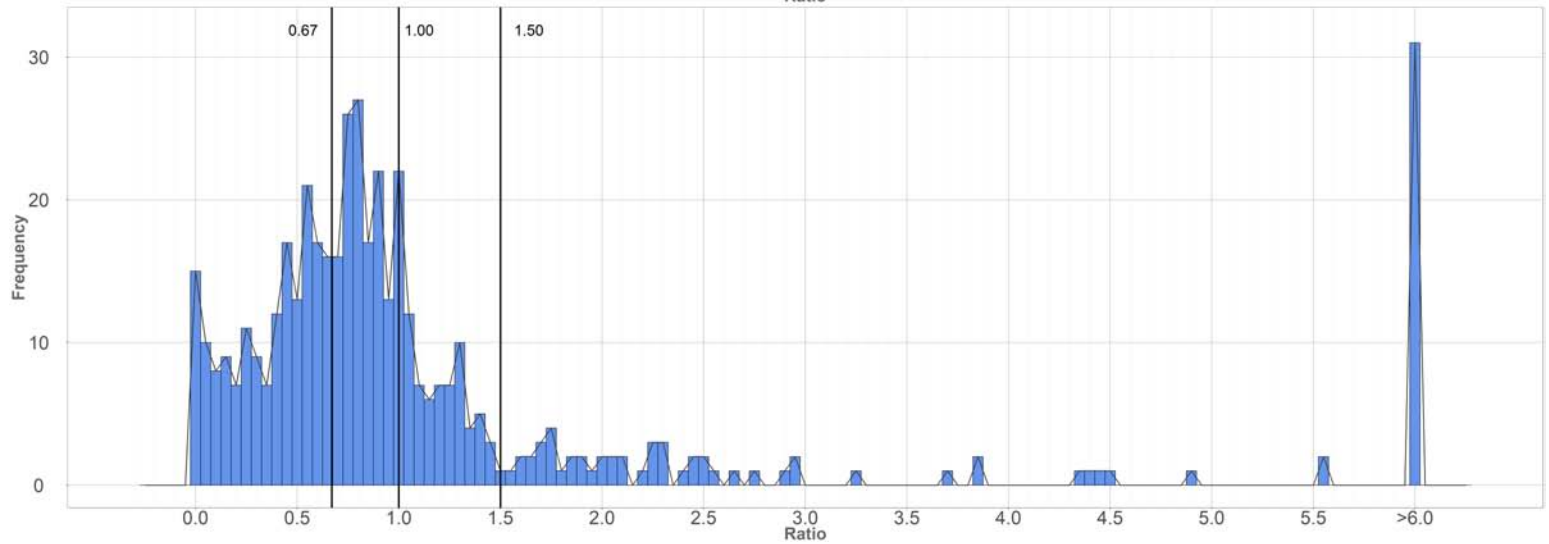



# Trisomy 2: Stress-related

*cis*

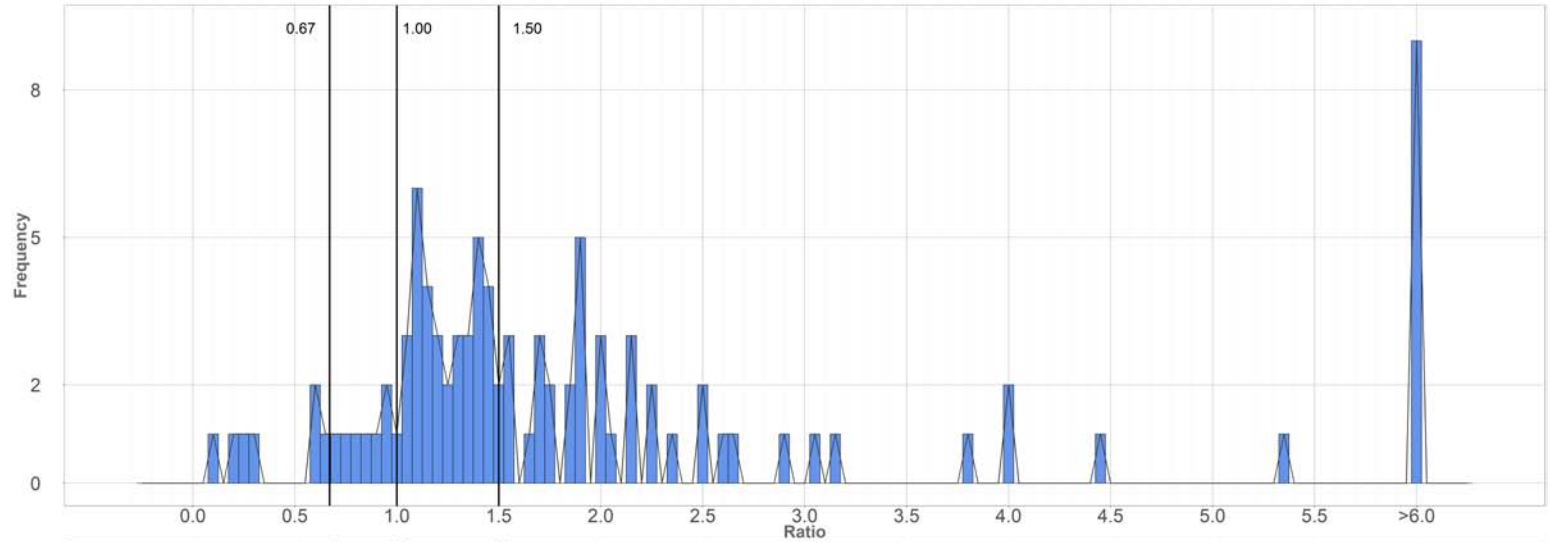

*trans*

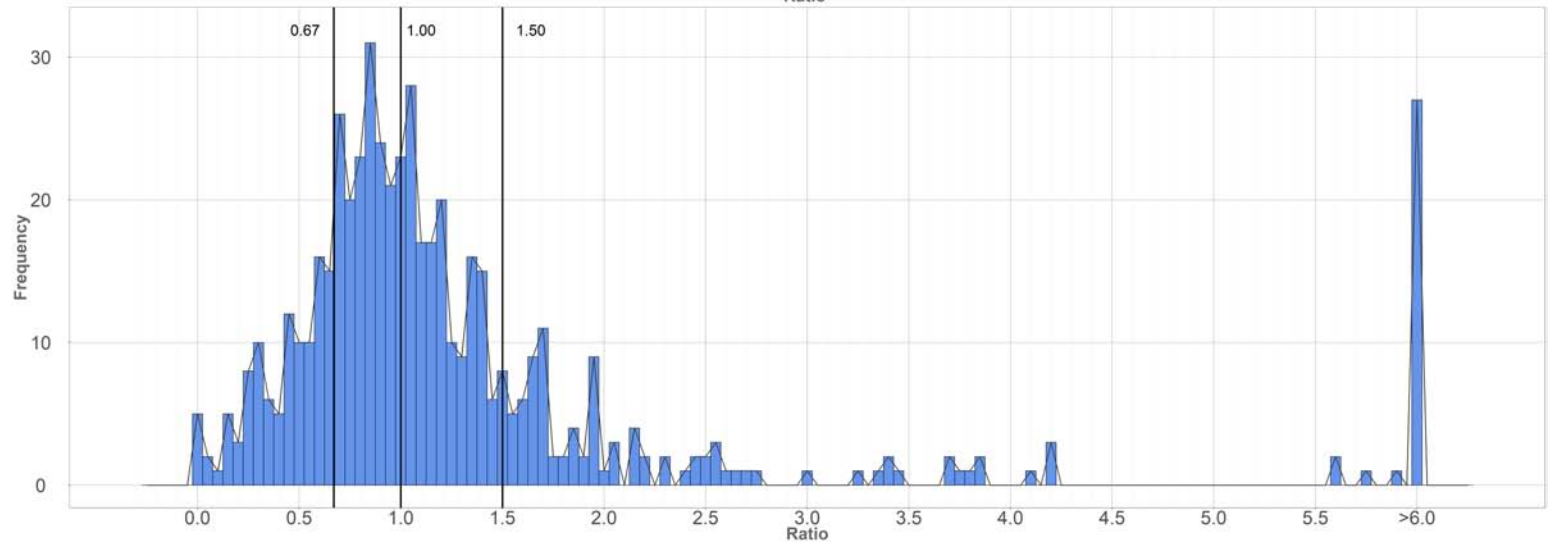

# Trisomy 3: Stress-related

*cis*

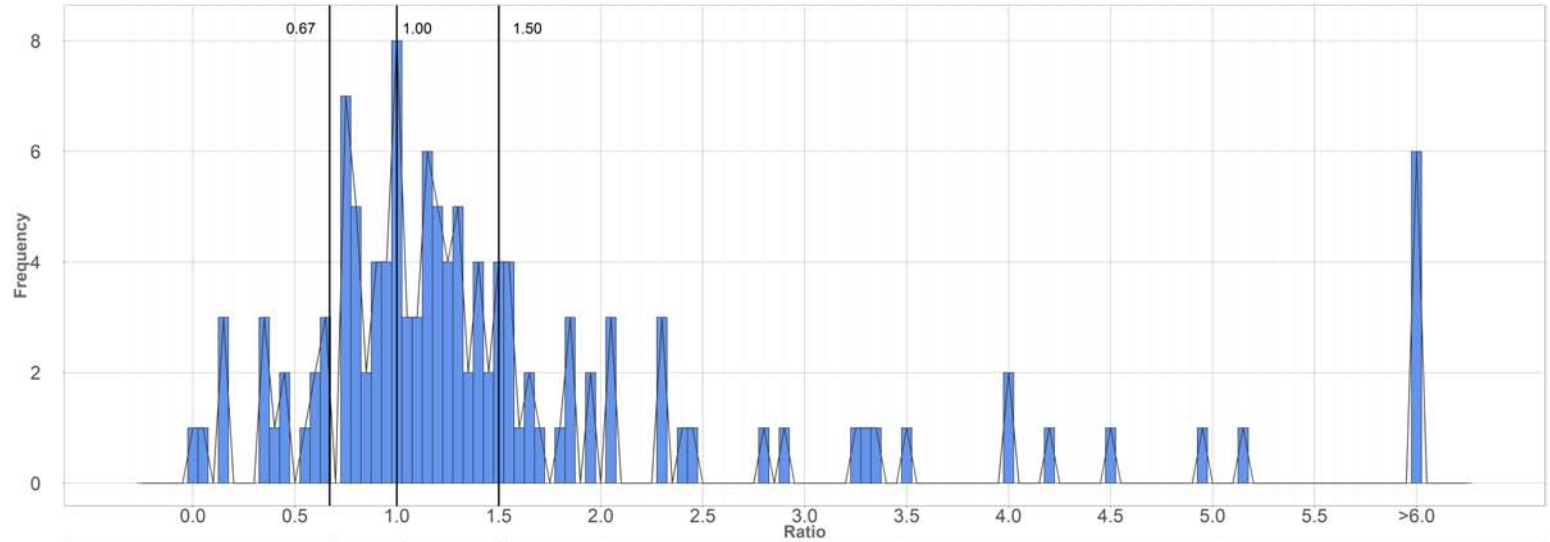

*trans*

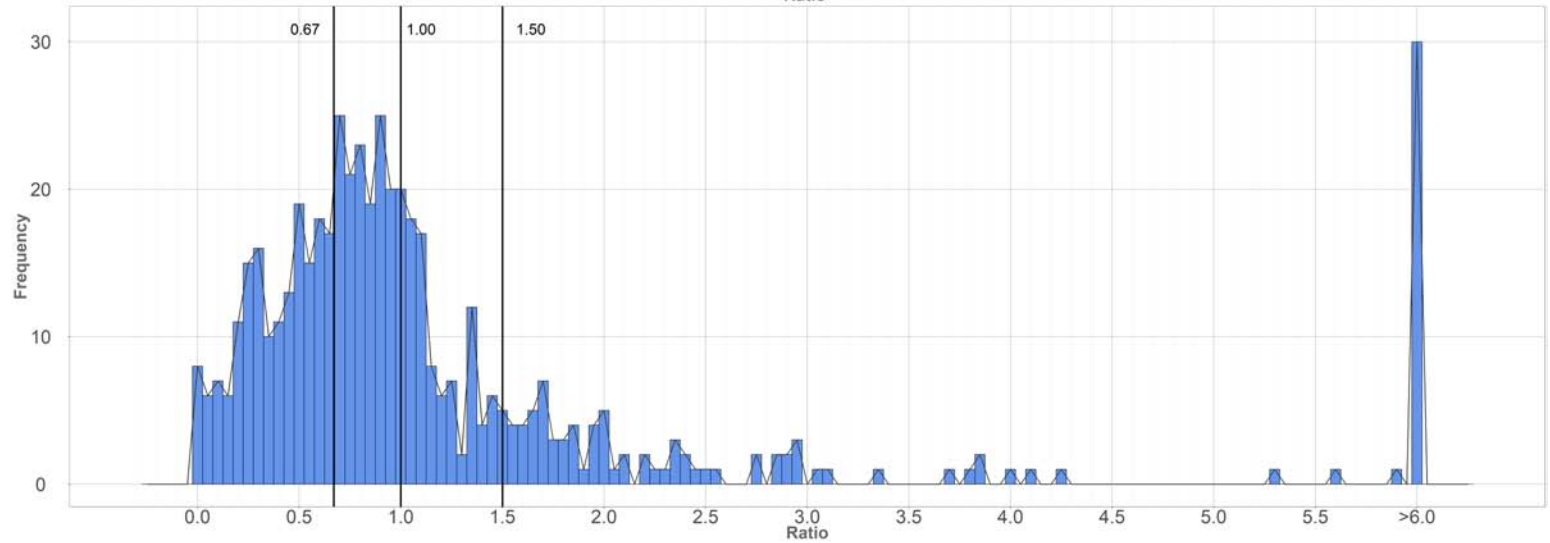

# Trisomy 4: Stress-related

*cis*

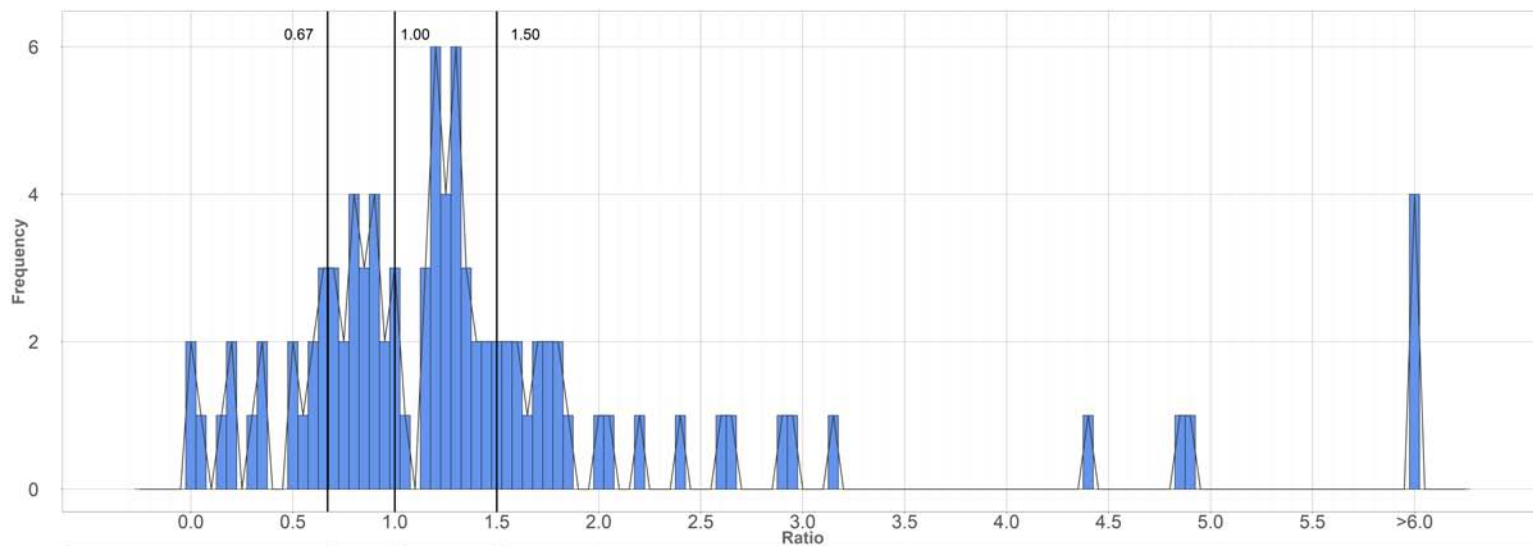

*trans*

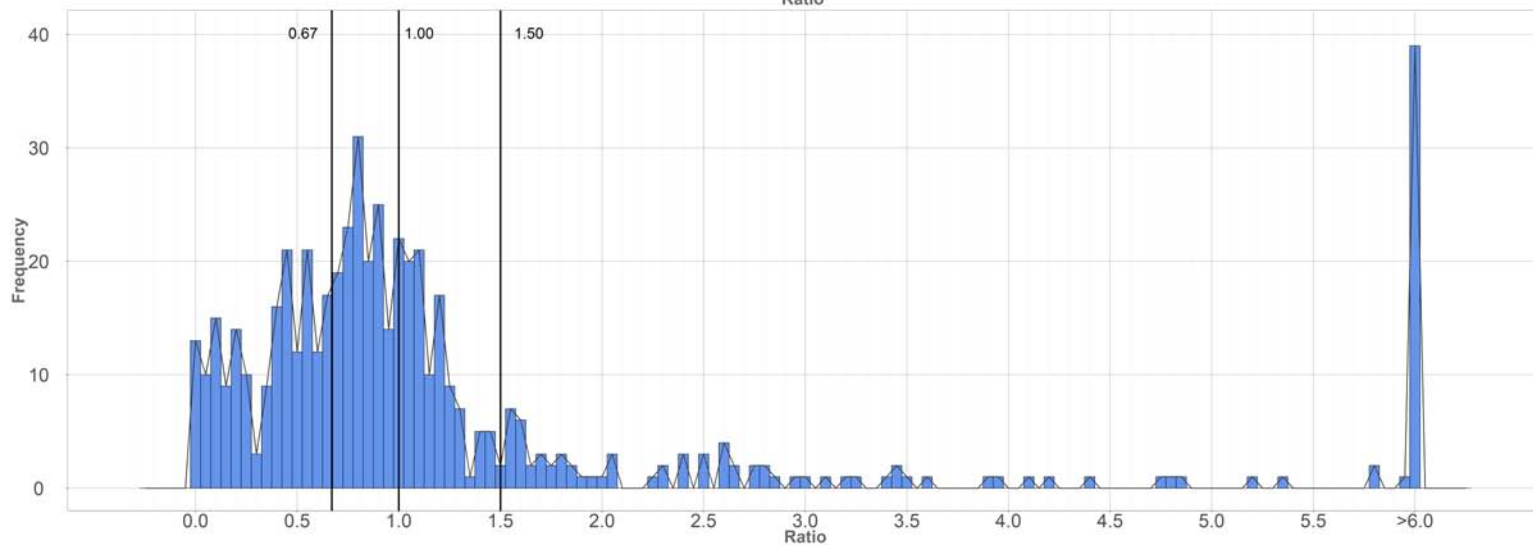

# Trisomy 5: Stress-related

*cis*

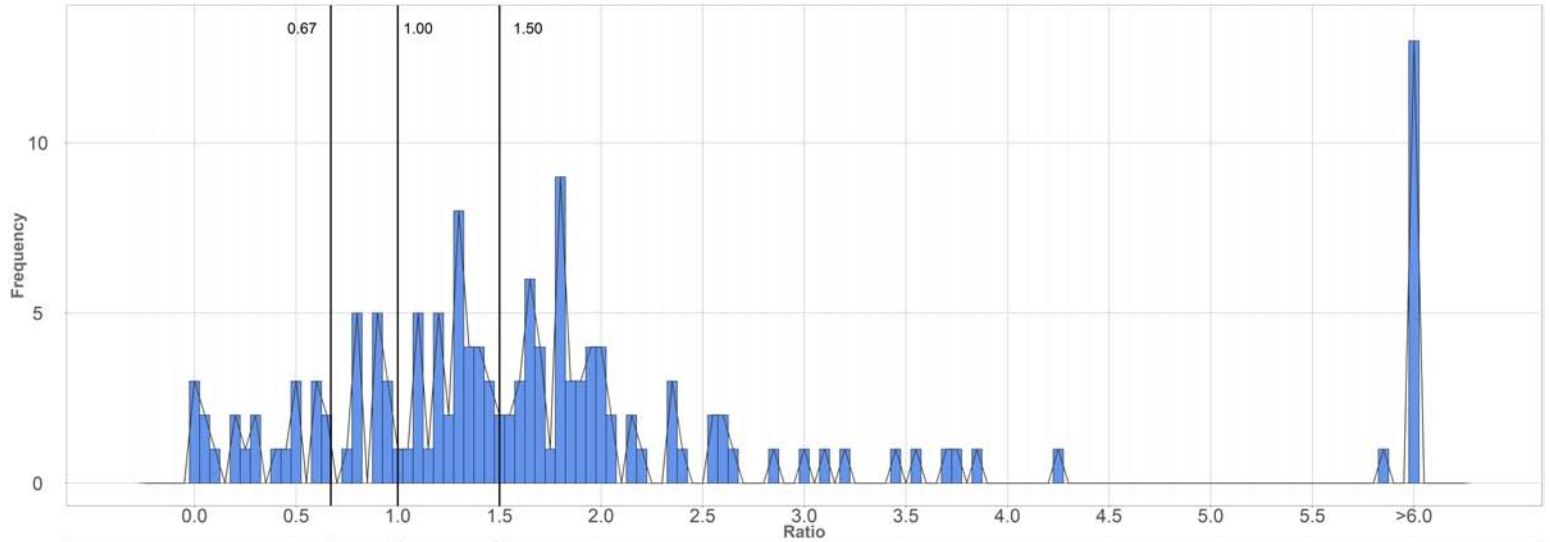

*trans*

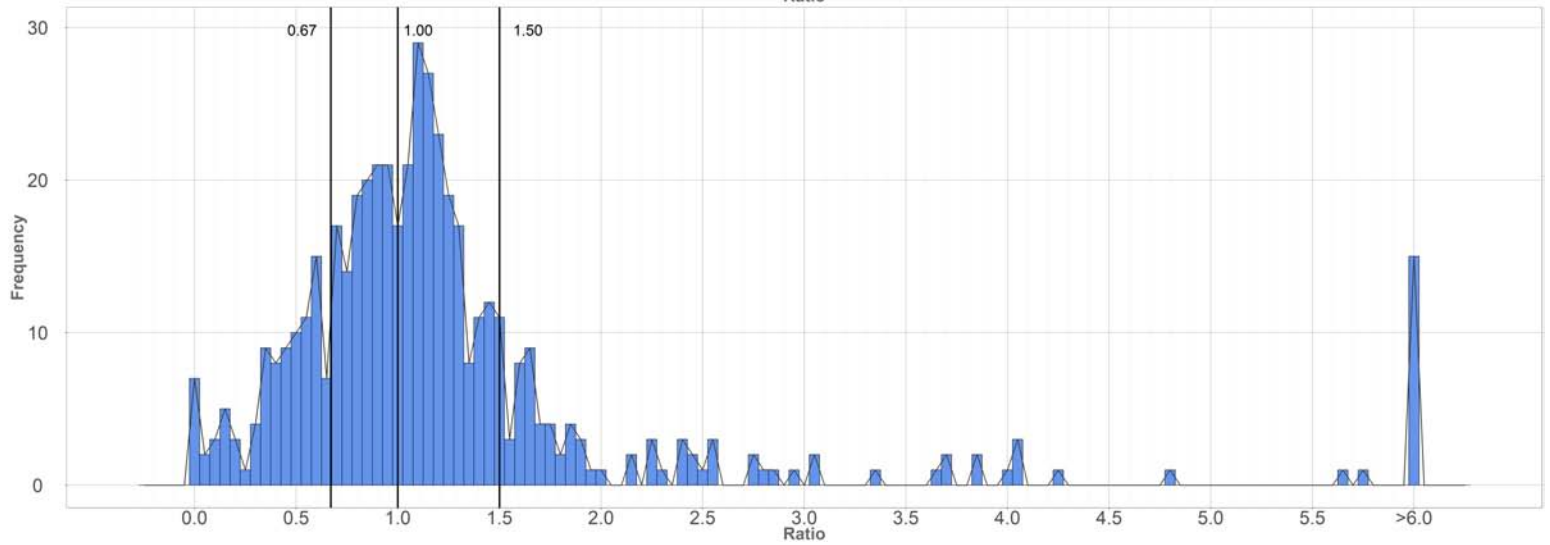

# Stress-related

Triploid

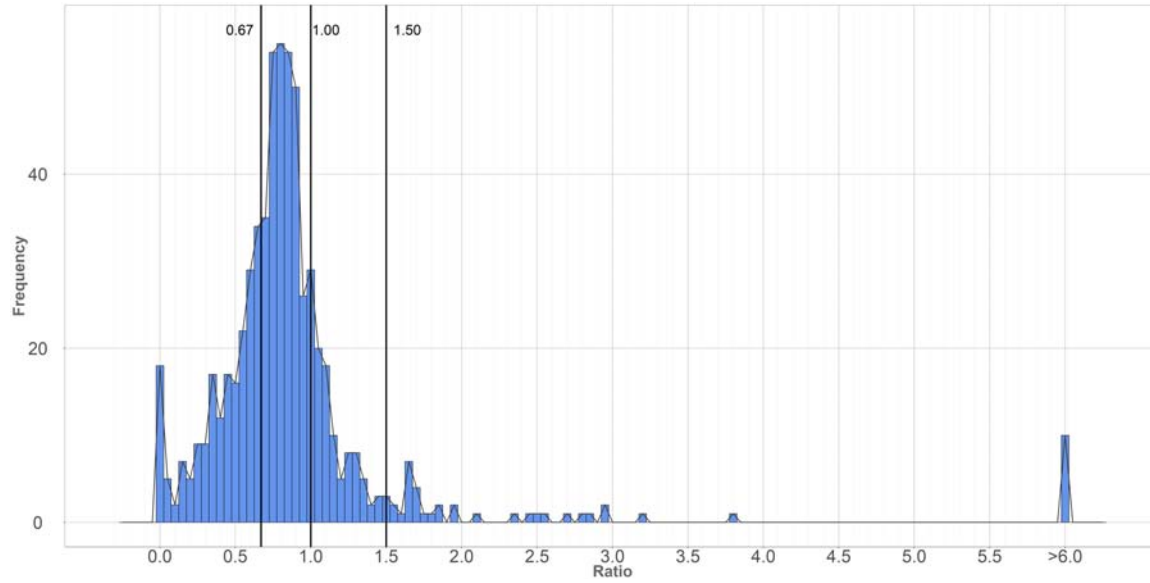

Tetraploid

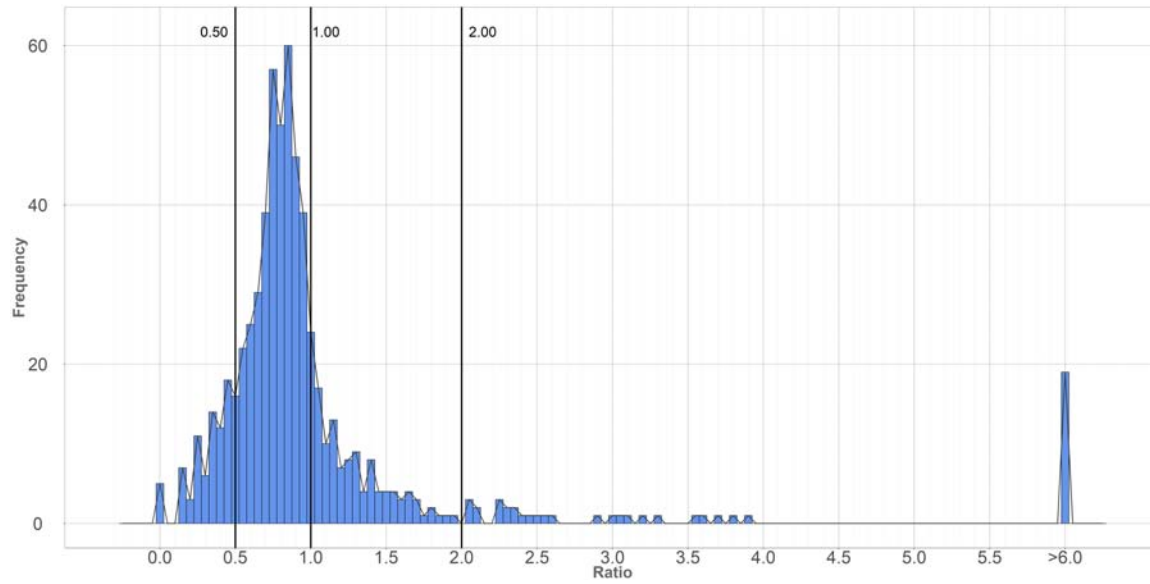

# Trisomy 1: Stress-related

*cis*

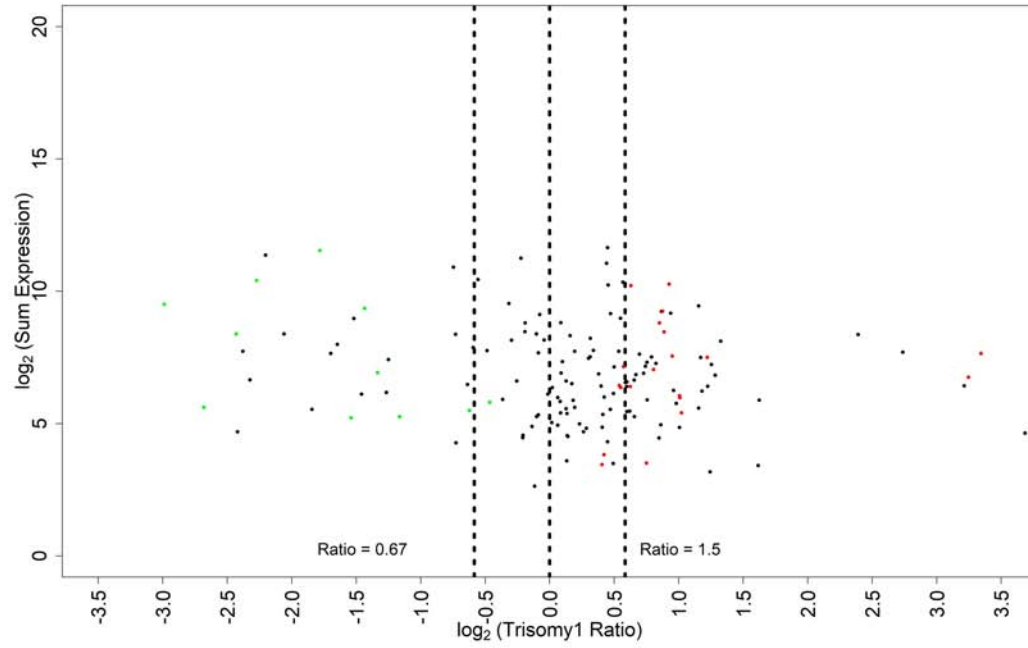

*trans*

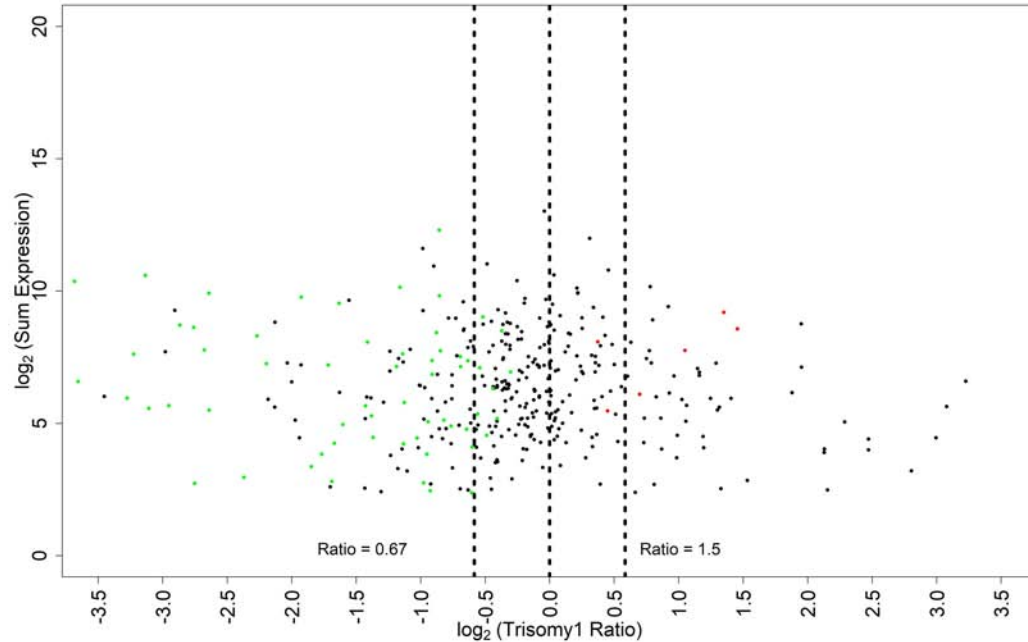

# Trisomy 2: Stress-related

*cis*

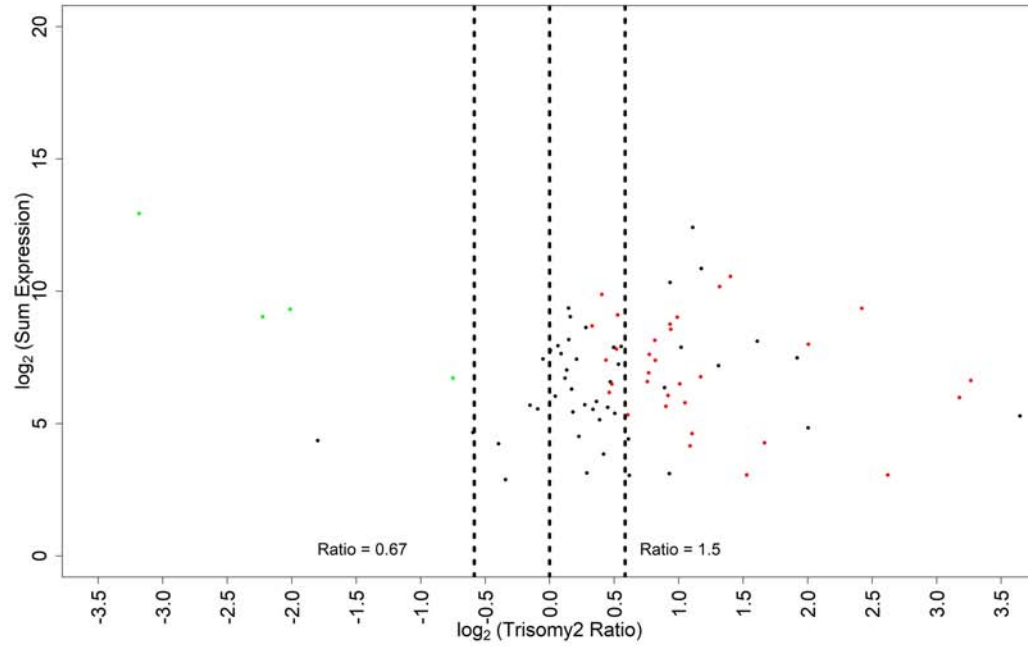

*trans*

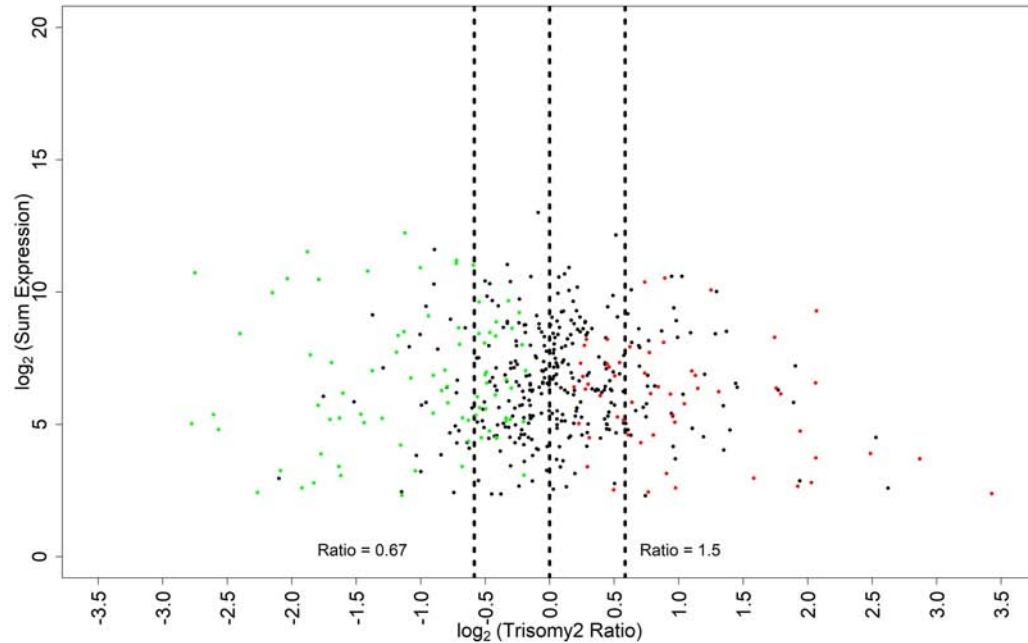

# Trisomy 3: Stress-related

*cis*

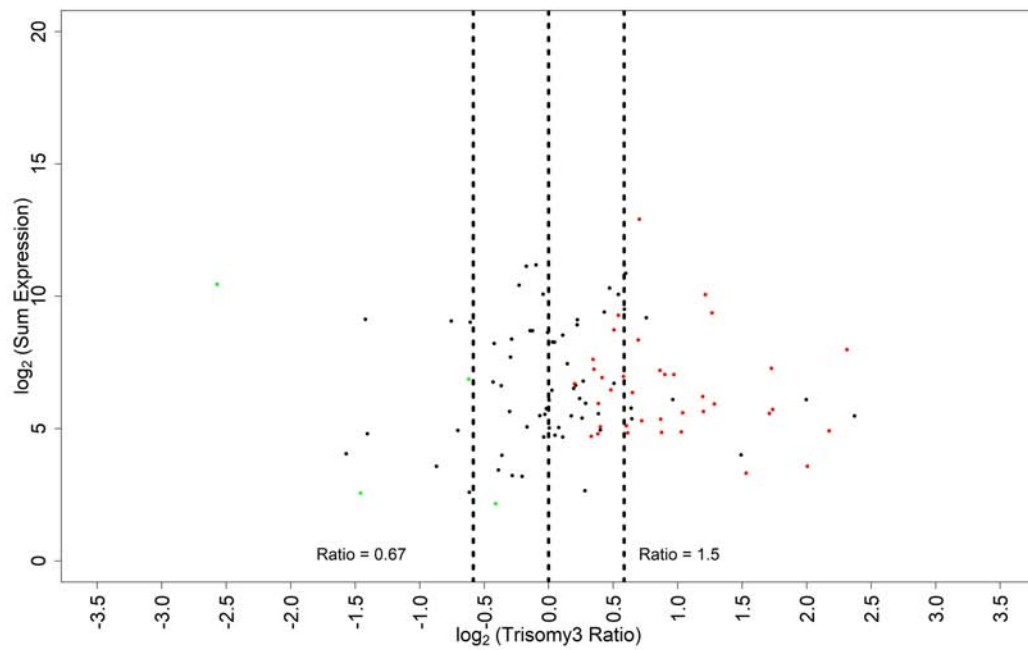

*trans*

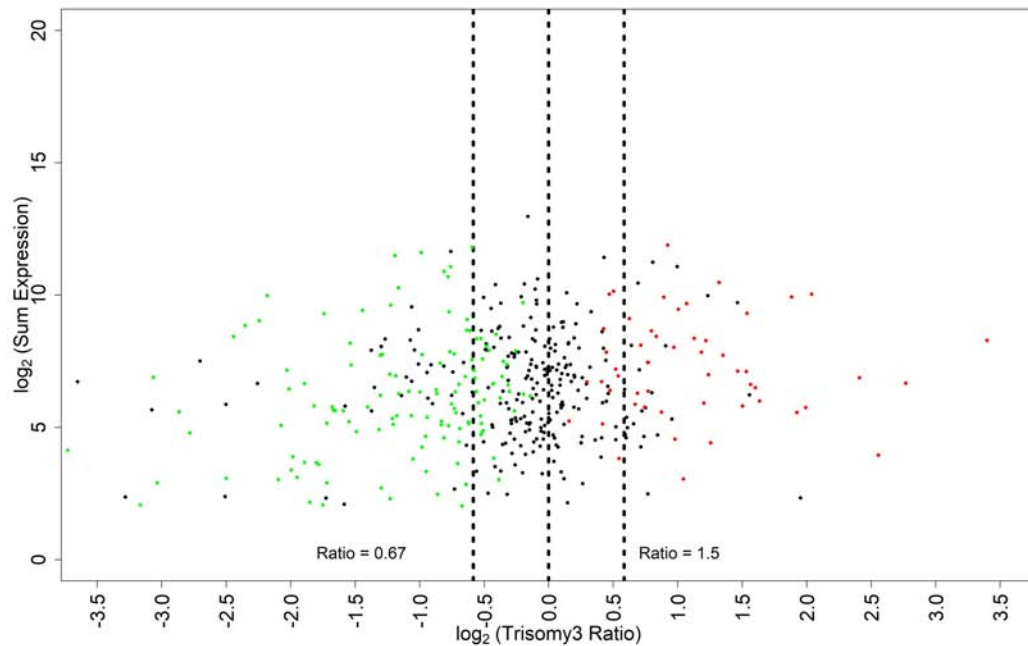



# Trisomy 4: Stress-related

*cis*

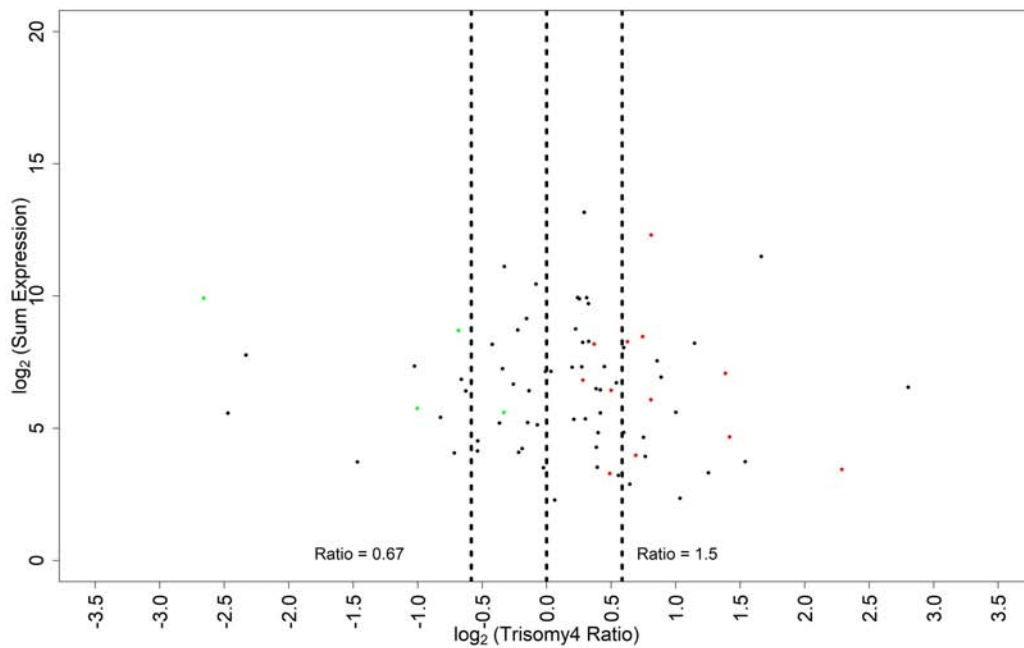

*trans*

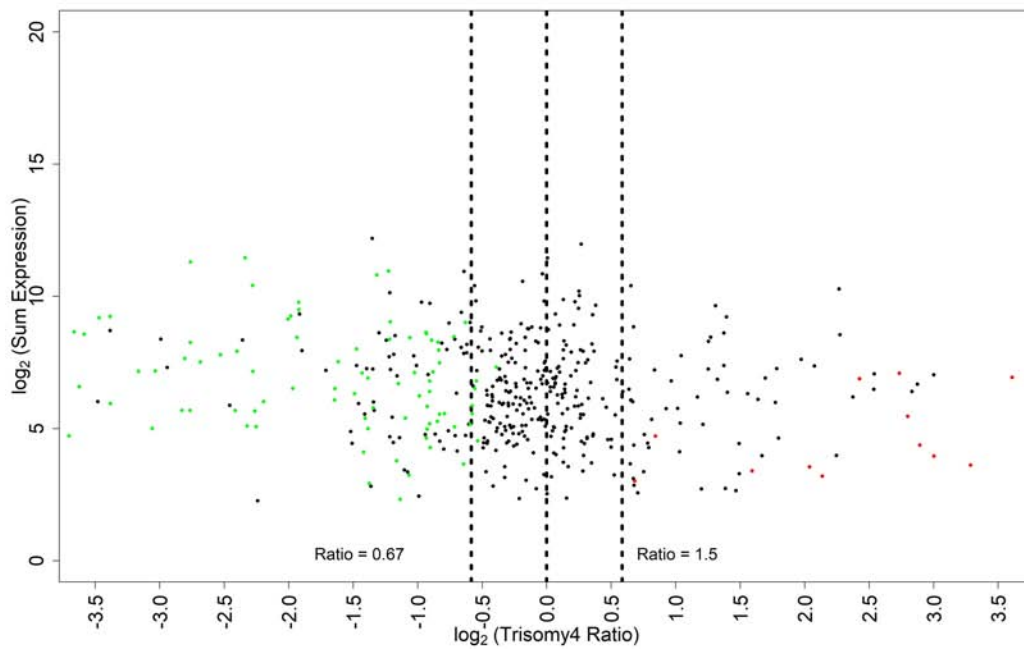

# Trisomy 5: Stress-related

*cis*

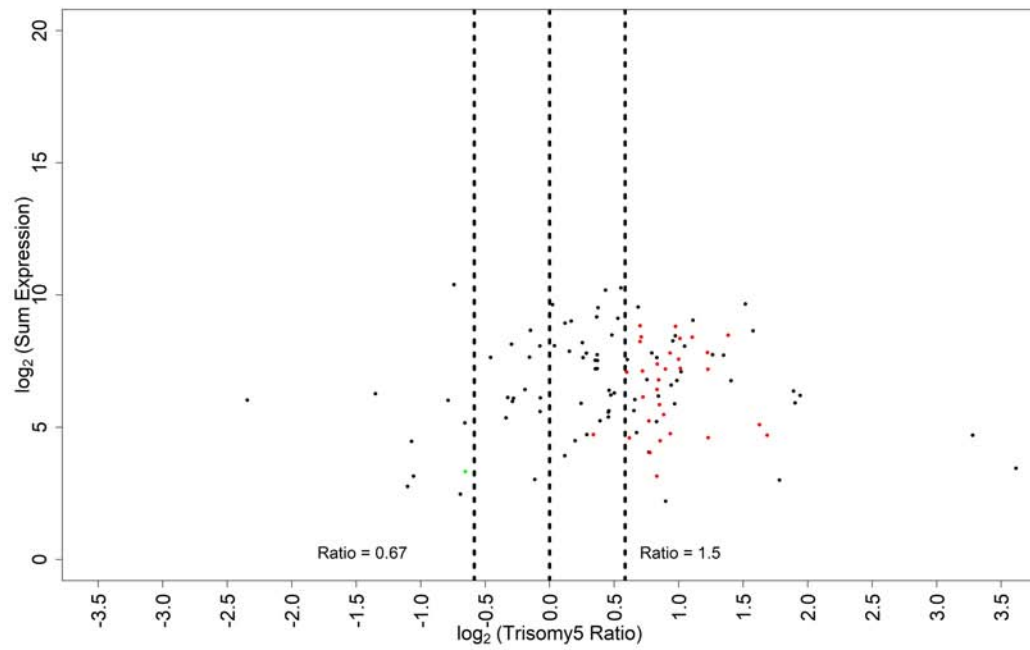

*trans*

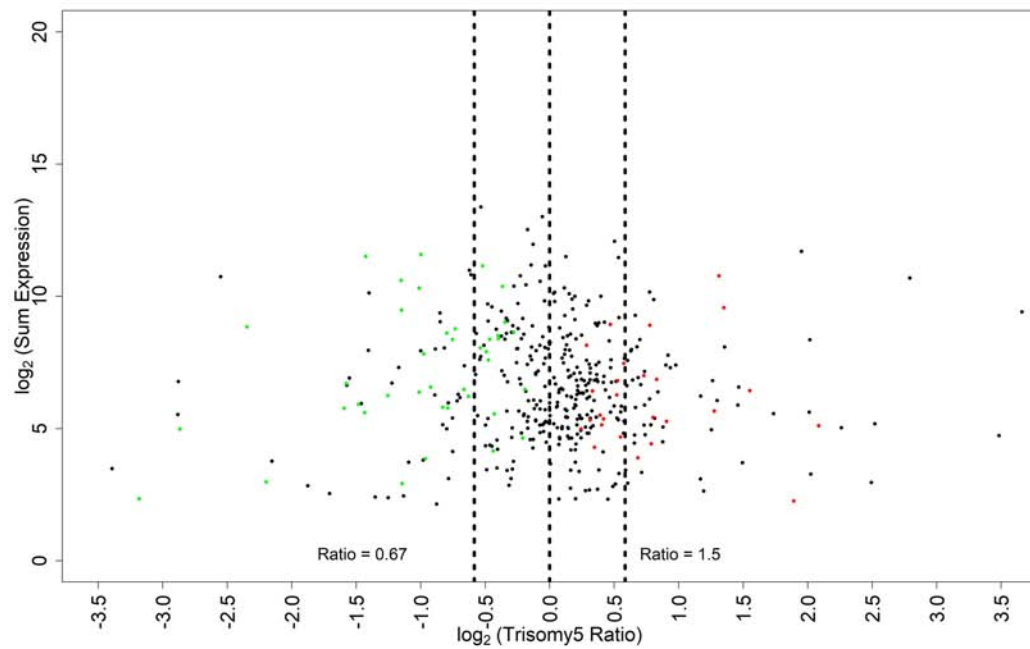

Triploid

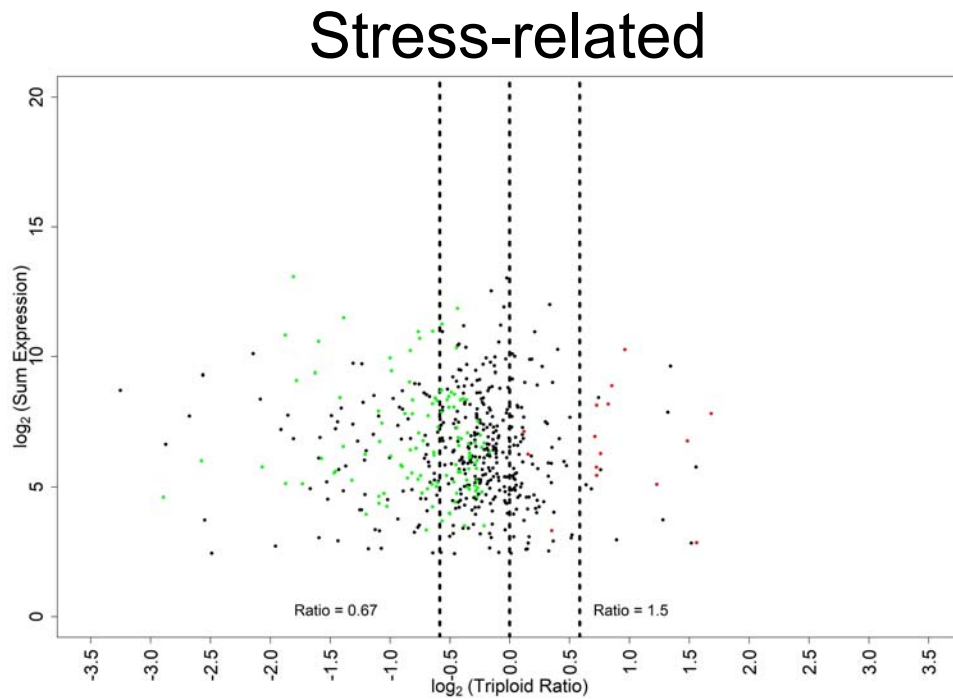

Tetraploid

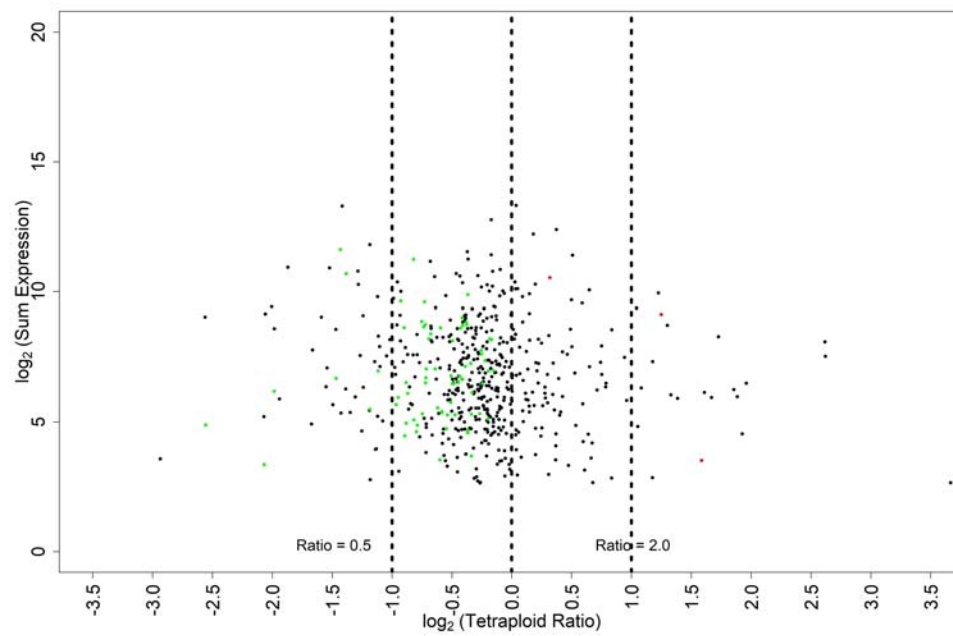

Fig. S10. Scatter plots of significant ratios for the functional class of chloroplast targeted genes. Plots were generated as described in Fig. S2.

# Trisomy 1: Chloroplast-targeted genes

*cis*

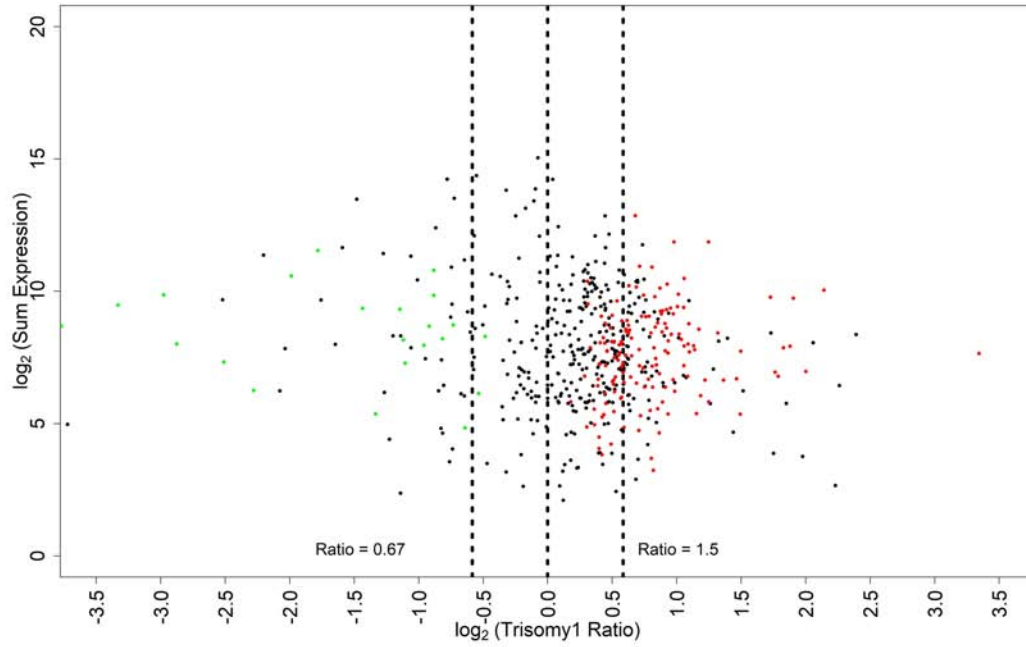

*trans*

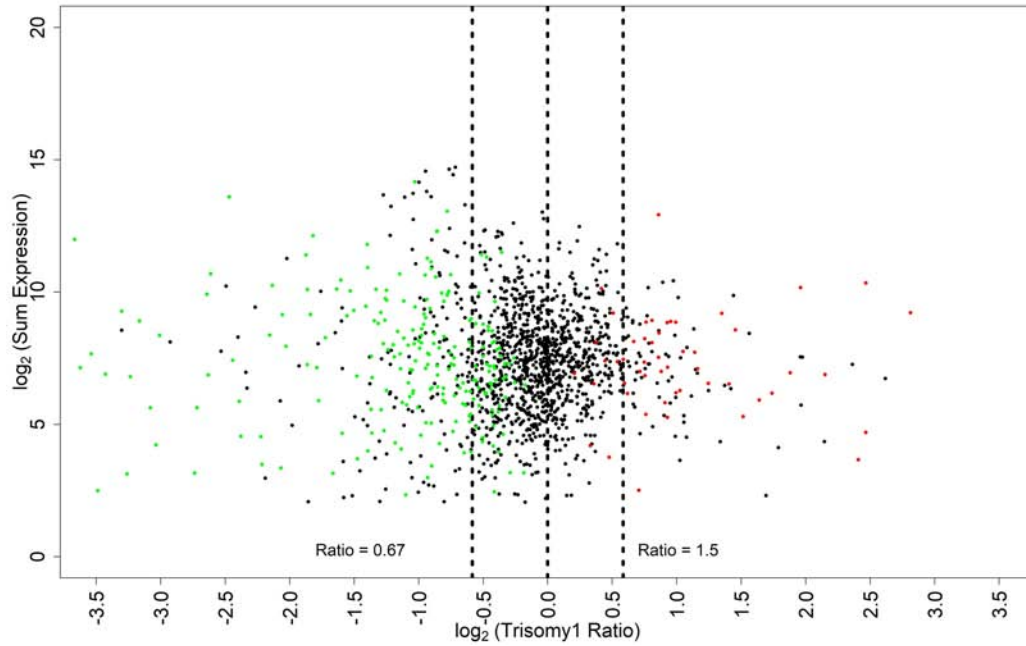

# Trisomy 2: Chloroplast-targeted genes

*cis*

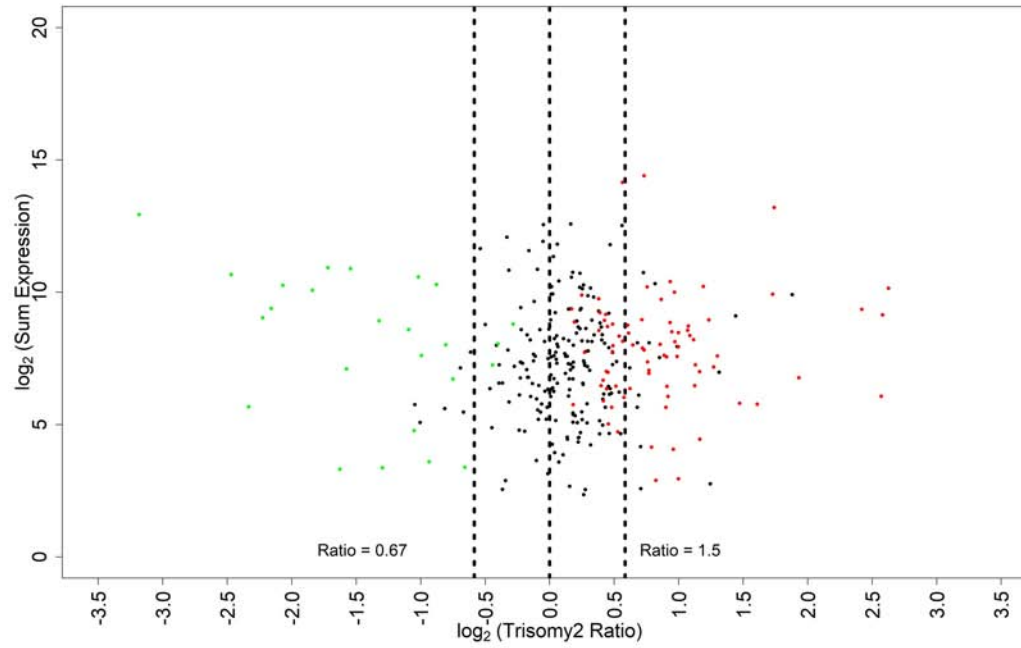

*trans*

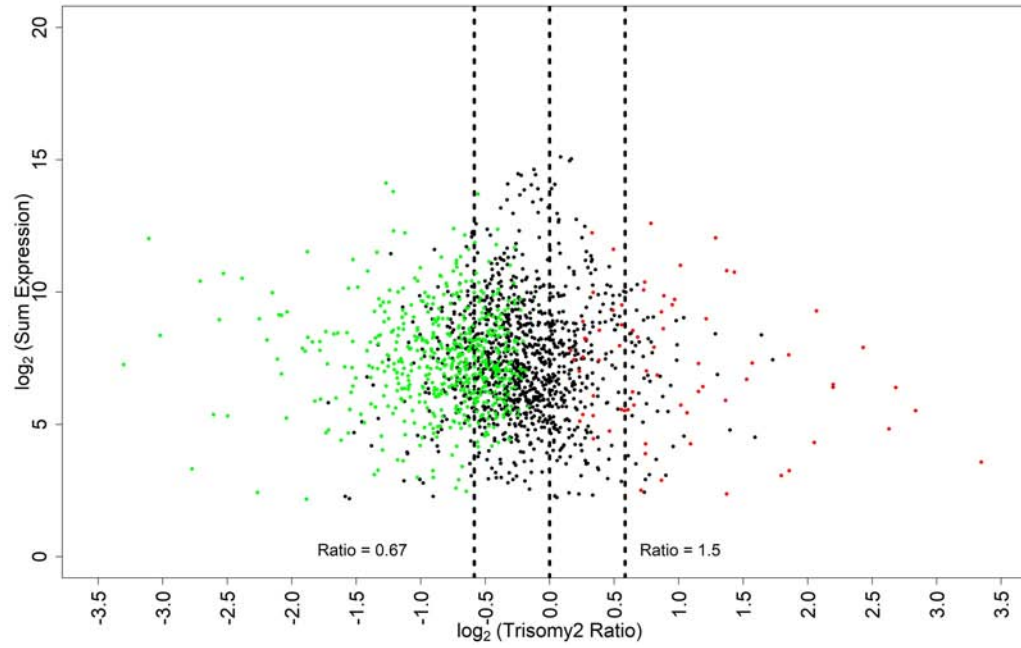

# Trisomy 3: Chloroplast-targeted genes

*cis*

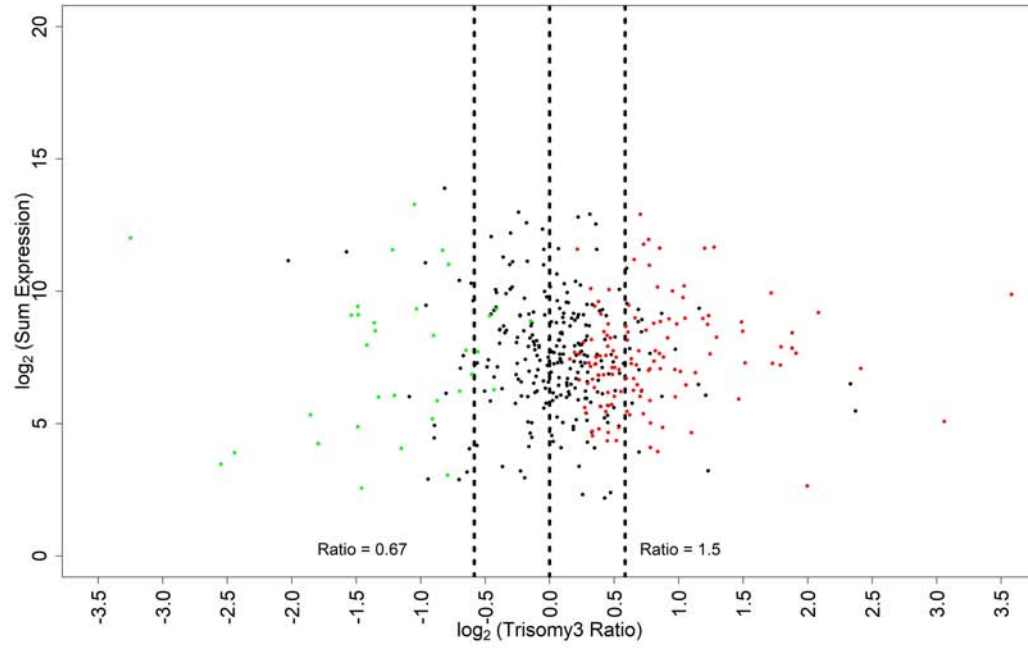

*trans*

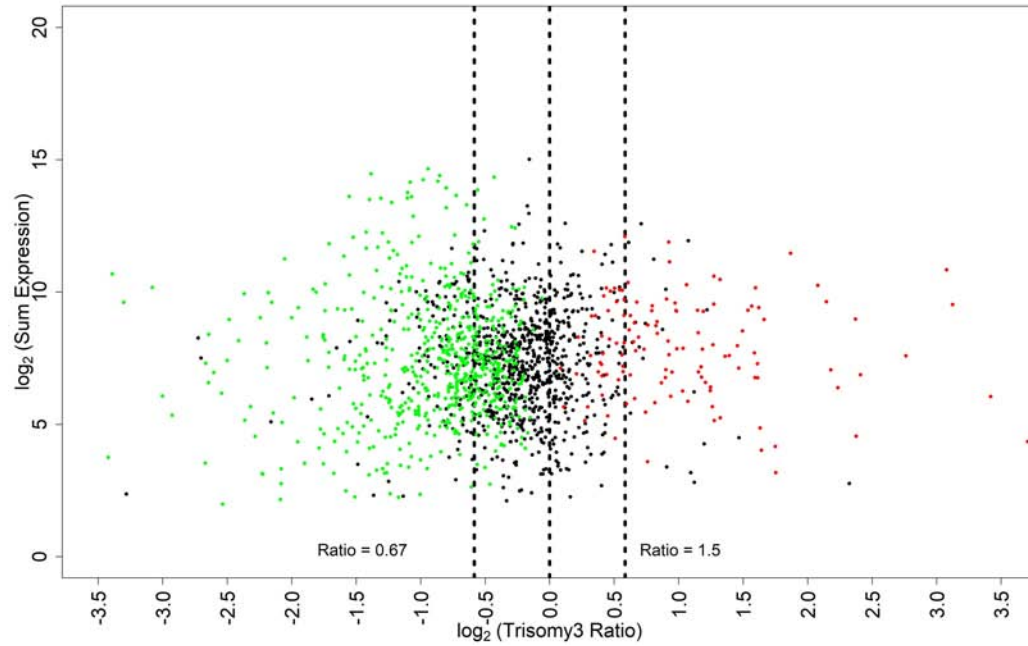

# Trisomy 4: Chloroplast-targeted genes

*cis*

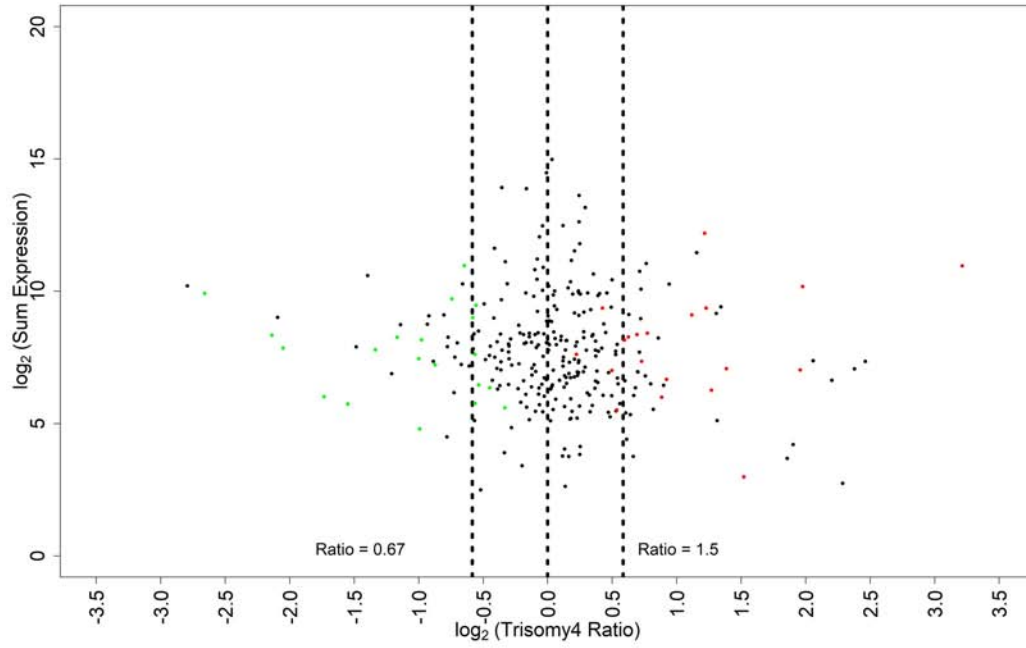

*trans*

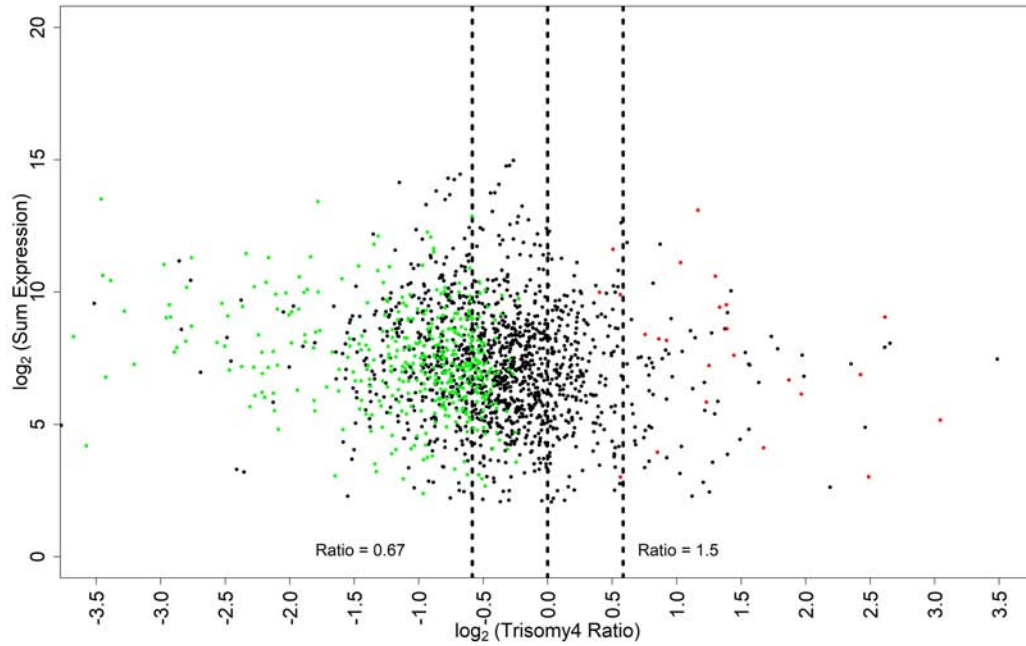



# Trisomy 5: Chloroplast-targeted genes

*cis*

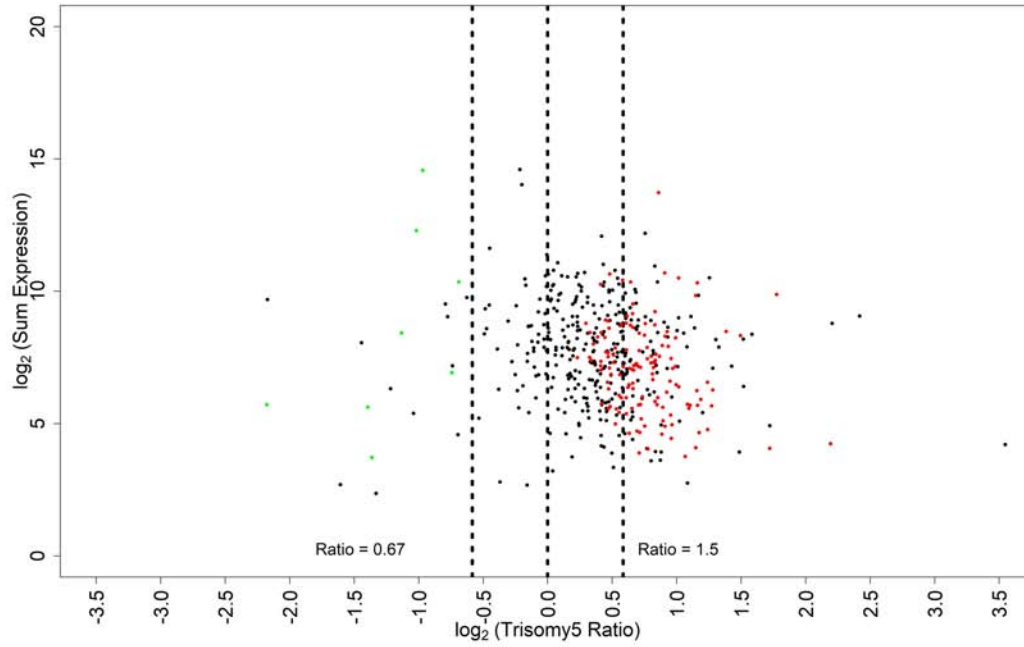

*trans*

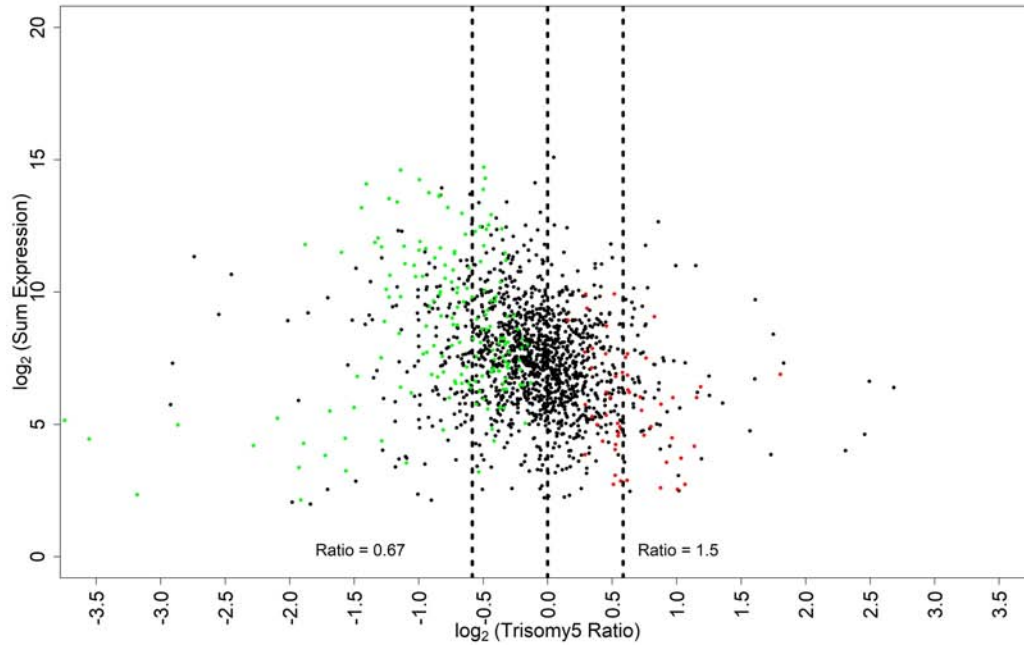

# Chloroplast-targeted genes

Triploid

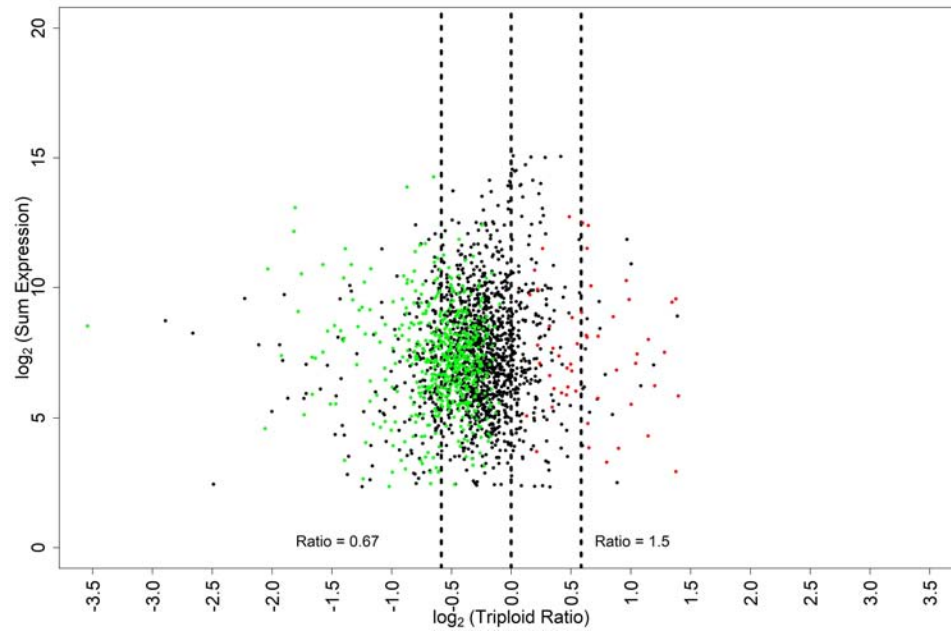

Tetraploid

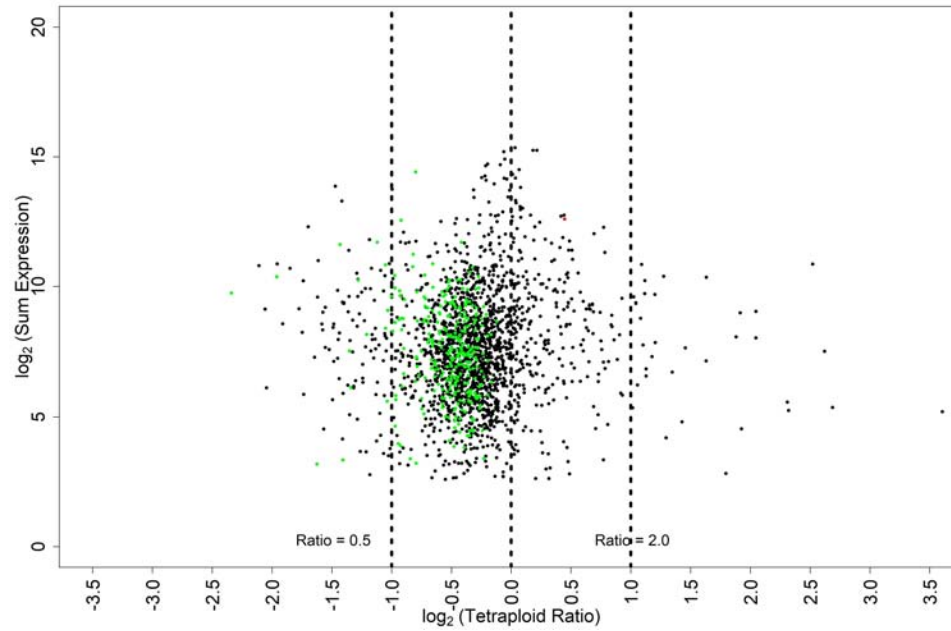

Fig. S11. Ratio distributions and scatter plots for the functional class of mitochondria and peroxisome targeted genes. Distributions were generated as described in Fig. 1 and scatter plots as described in Fig. S2.

# Trisomy 1: Mitochondrial-targeted genes

*cis*

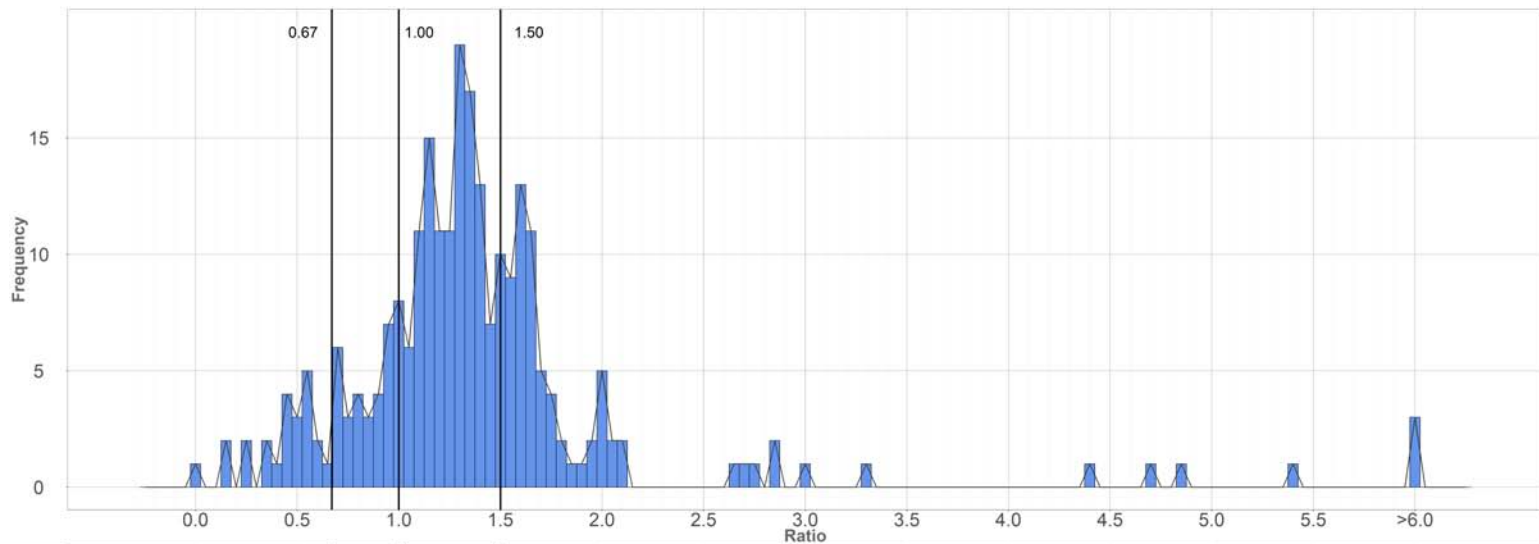

*trans*

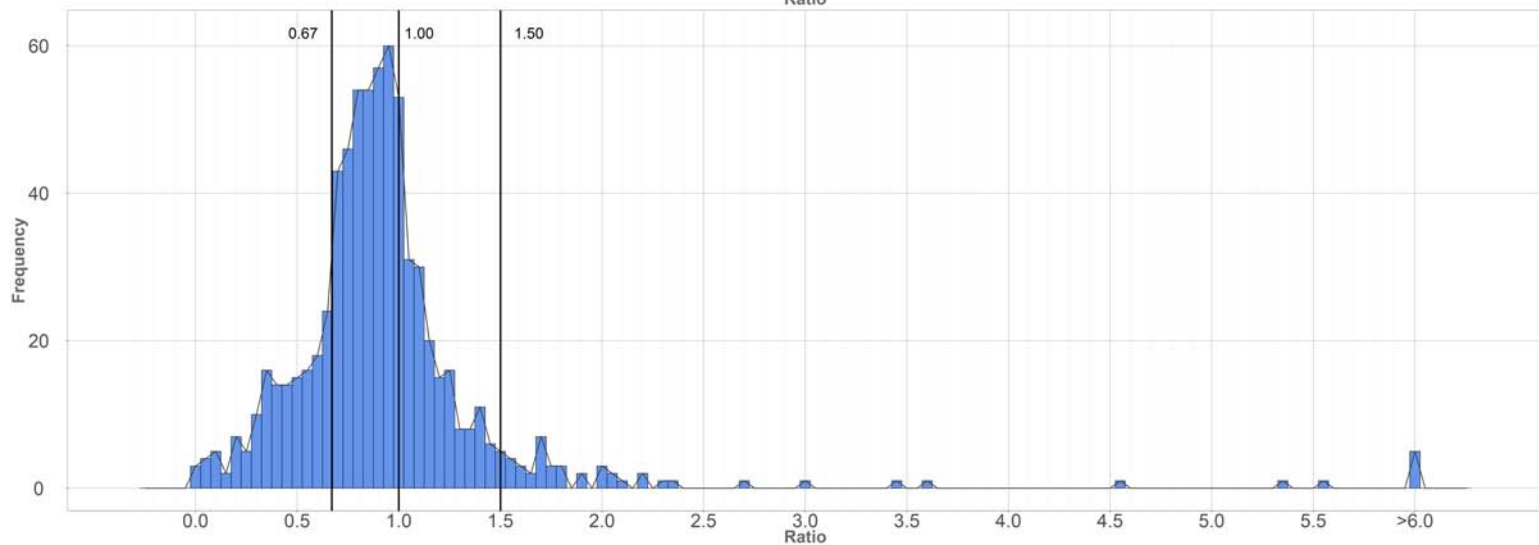

# Trisomy 2: Mitochondrial-targeted genes

*cis*

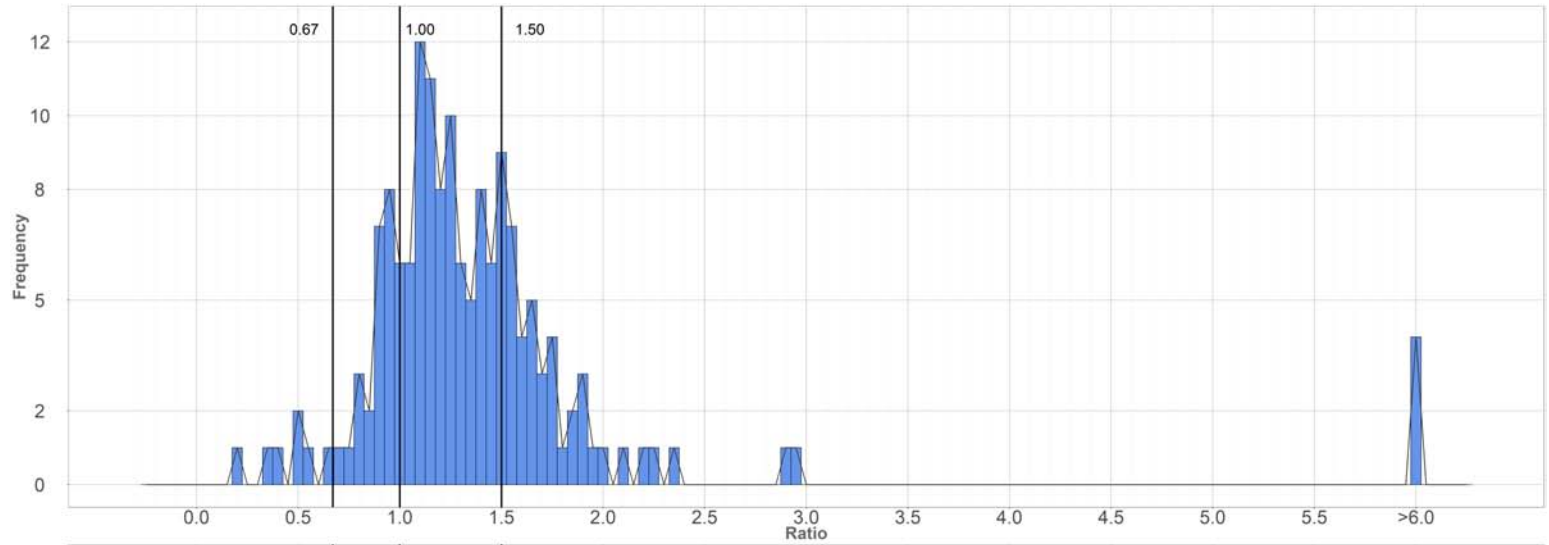

*trans*

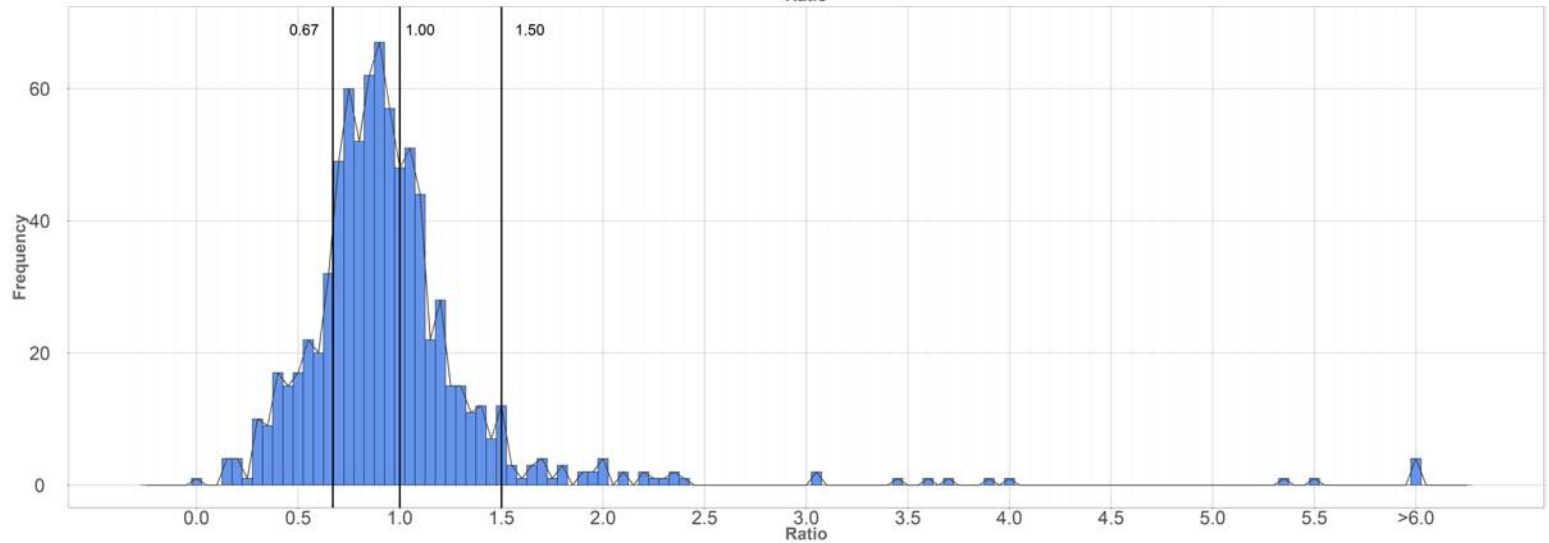

# Trisomy 3: Mitochondrial-targeted genes

*cis*

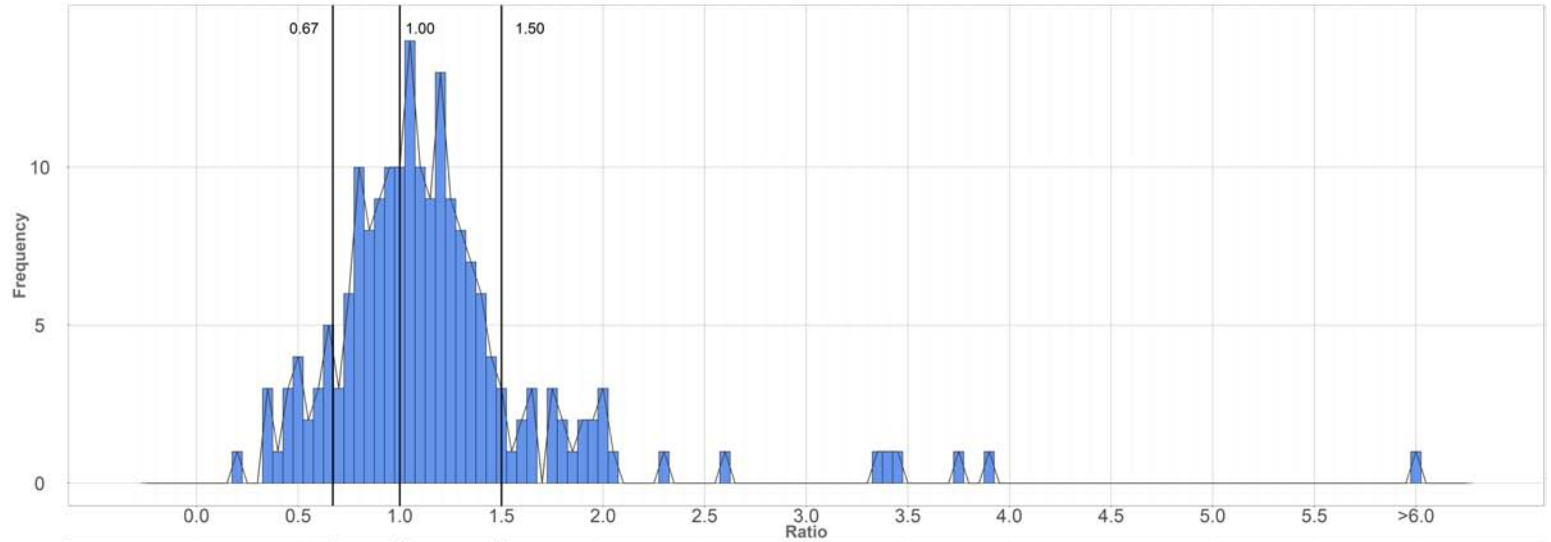

*trans*

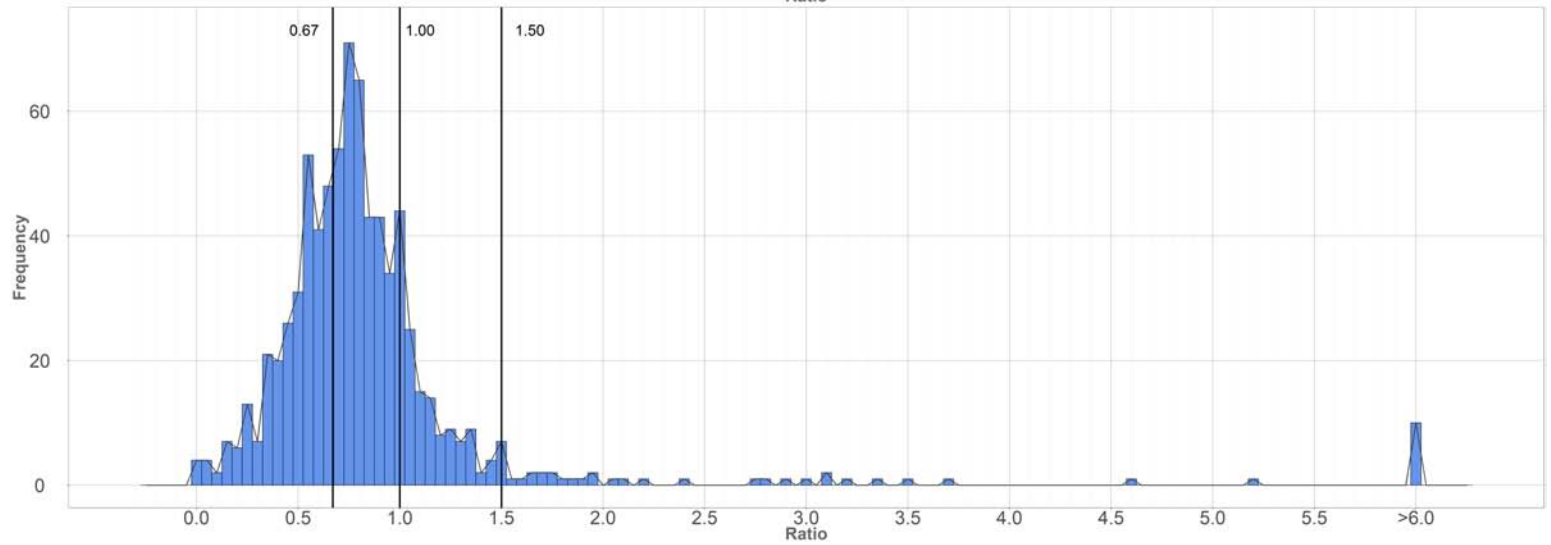

# Trisomy 4: Mitochondrial-targeted genes

*cis*

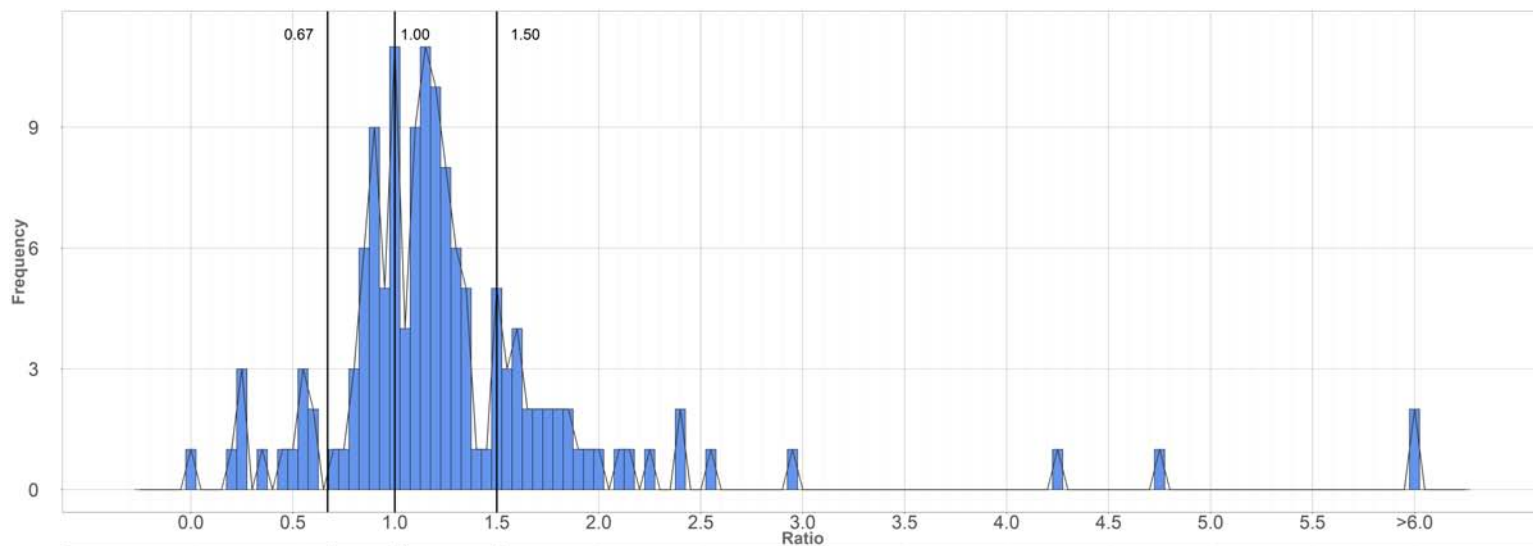

*trans*

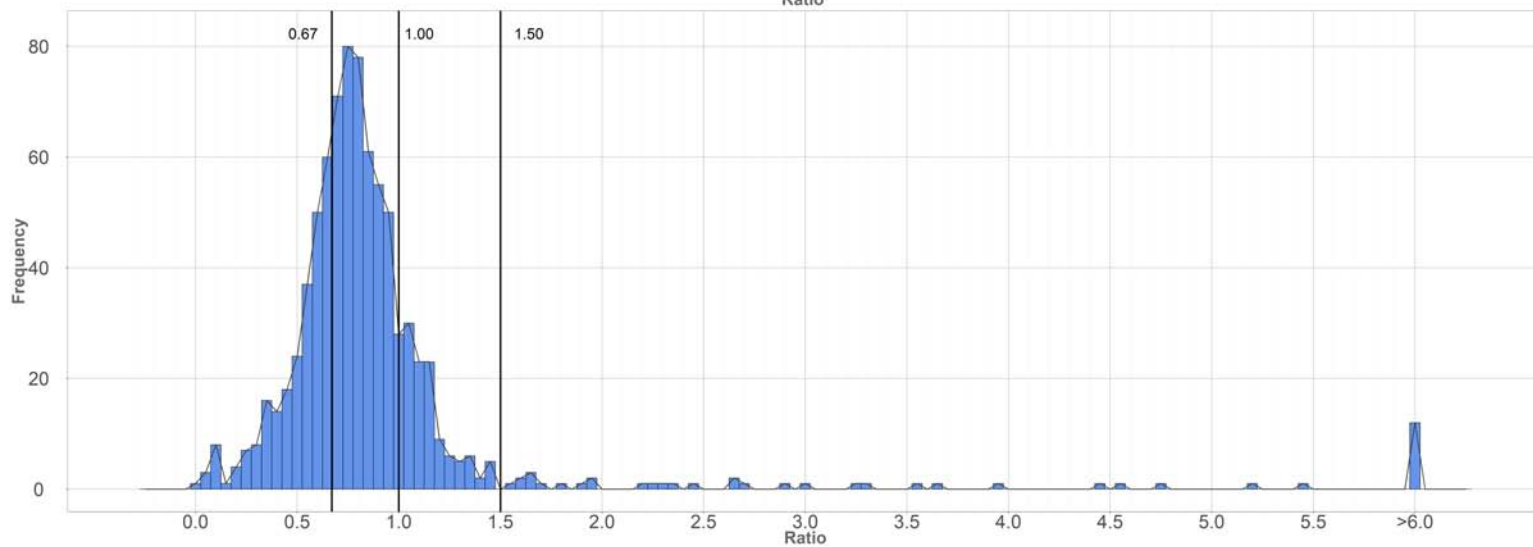

# Trisomy 5: Mitochondrial-targeted genes

*cis*

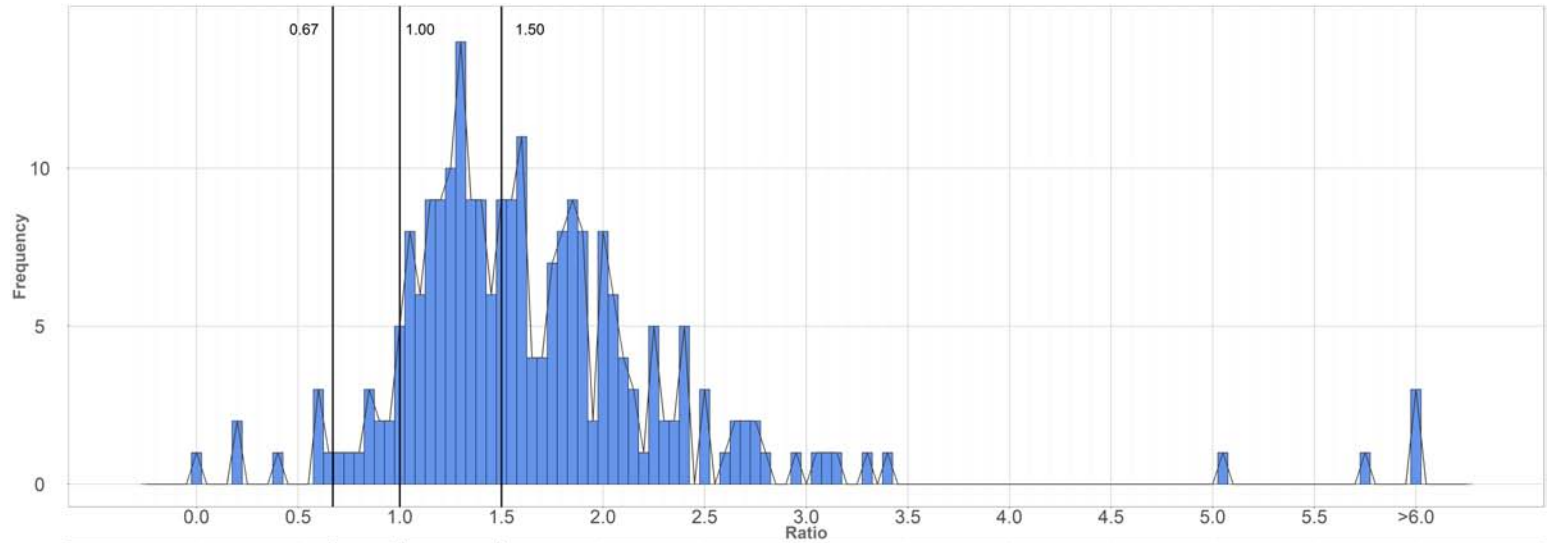

*trans*

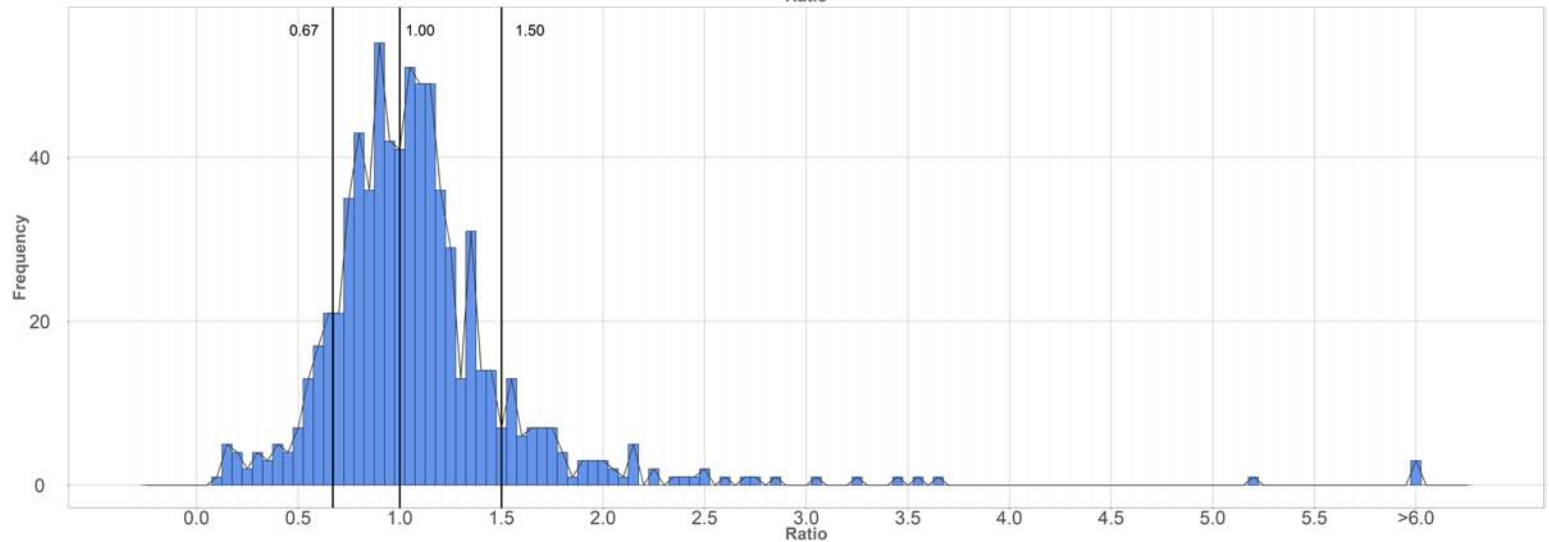



# Mitochondrial-targeted genes

Triploid

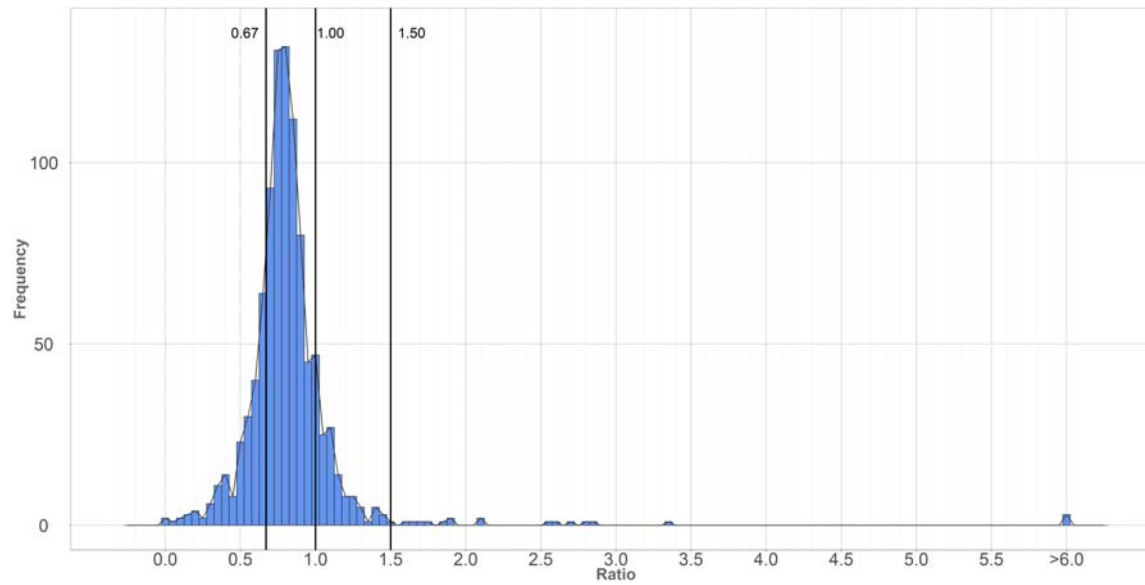

Tetraploid

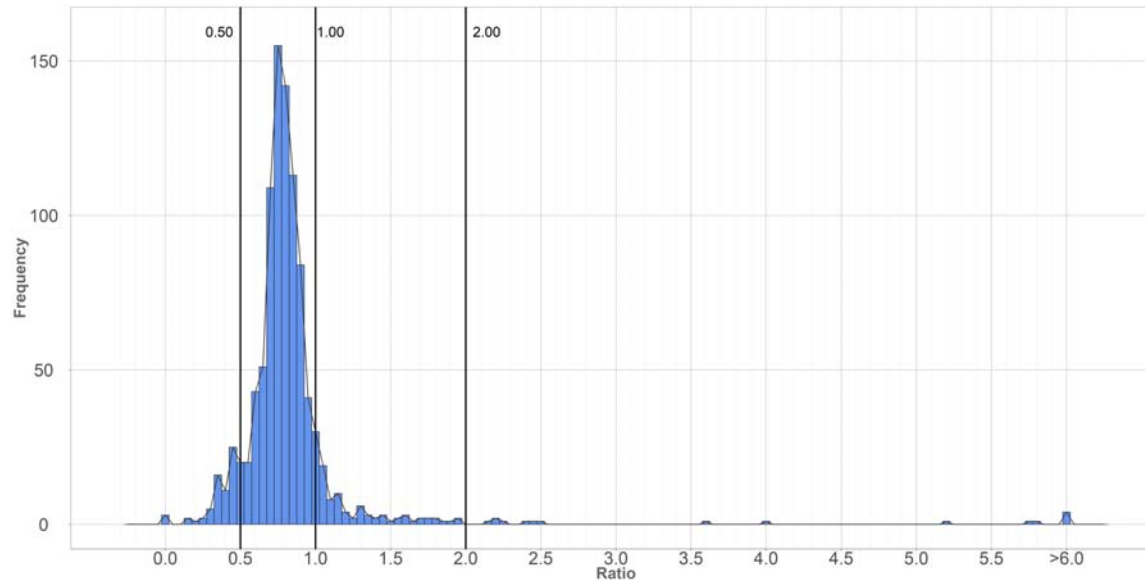

# Trisomy 1: Peroxisome-targeted genes

*cis*

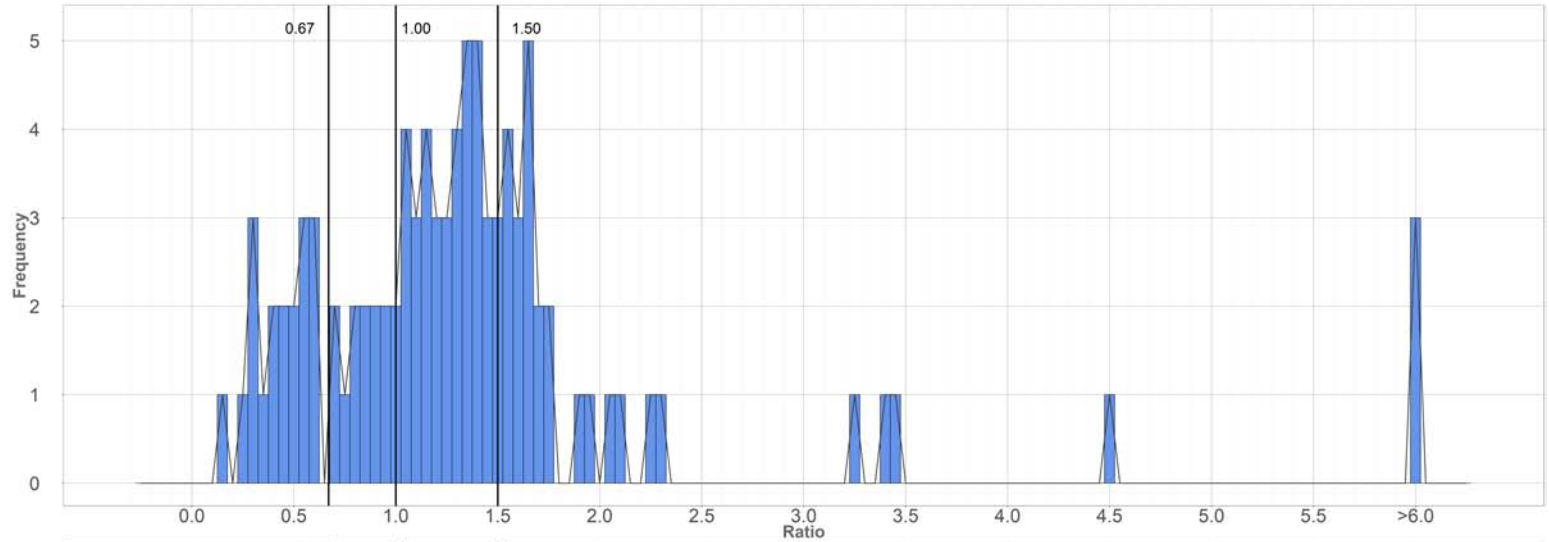

*trans*

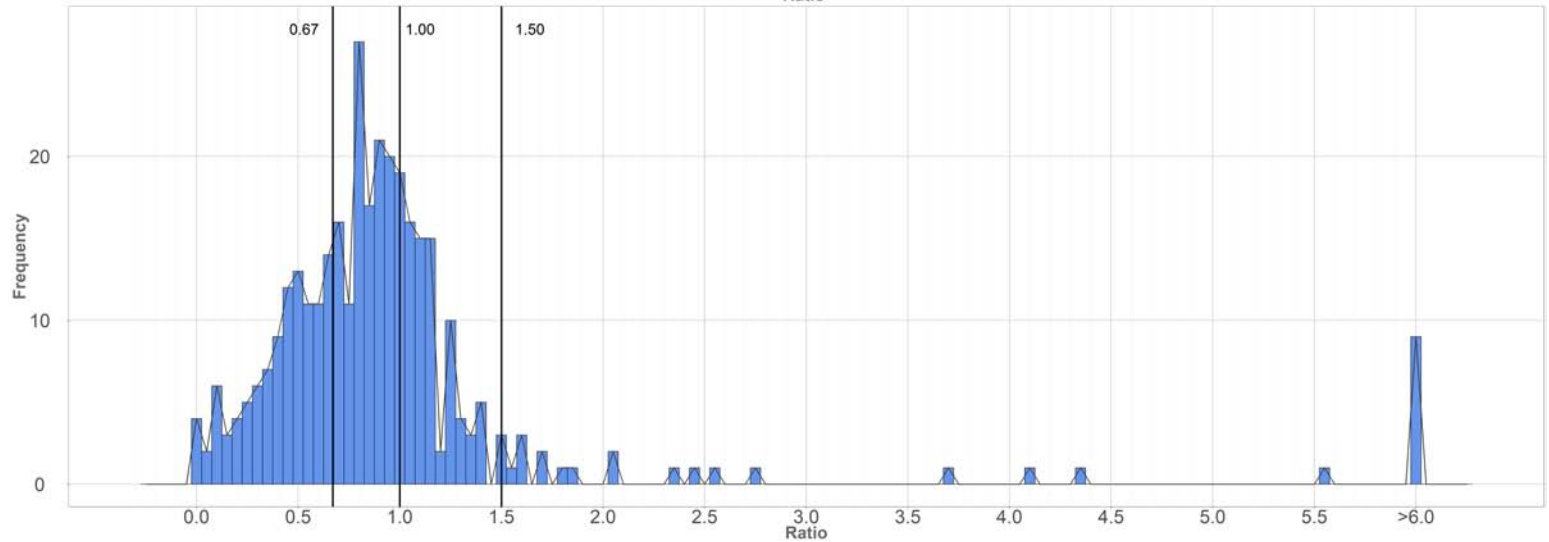

# Trisomy 2: Peroxisome-targeted genes

*cis*

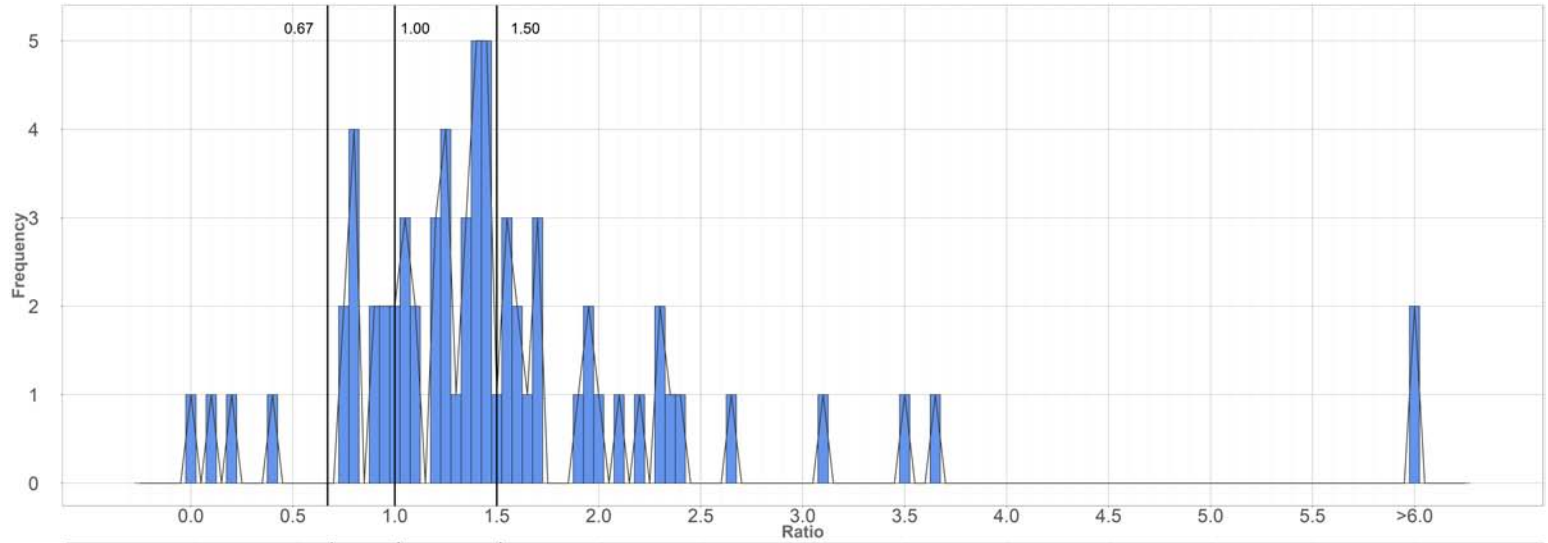

*trans*

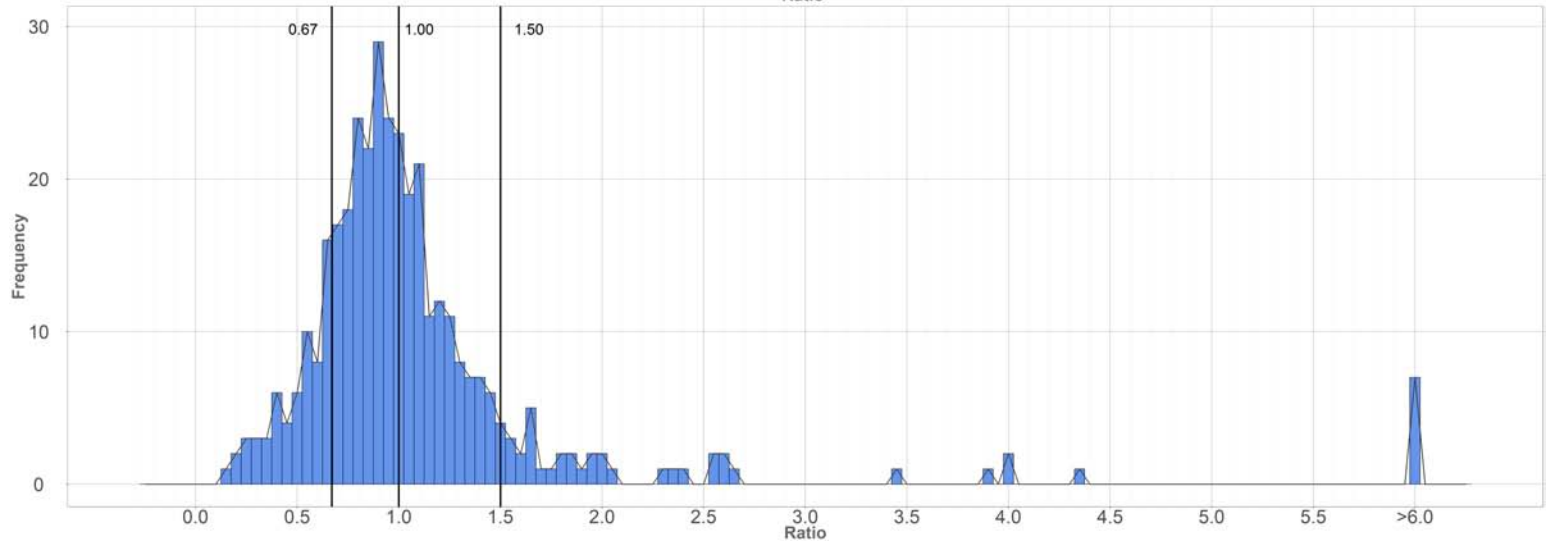

# Trisomy 3: Peroxisome-targeted genes

*cis*

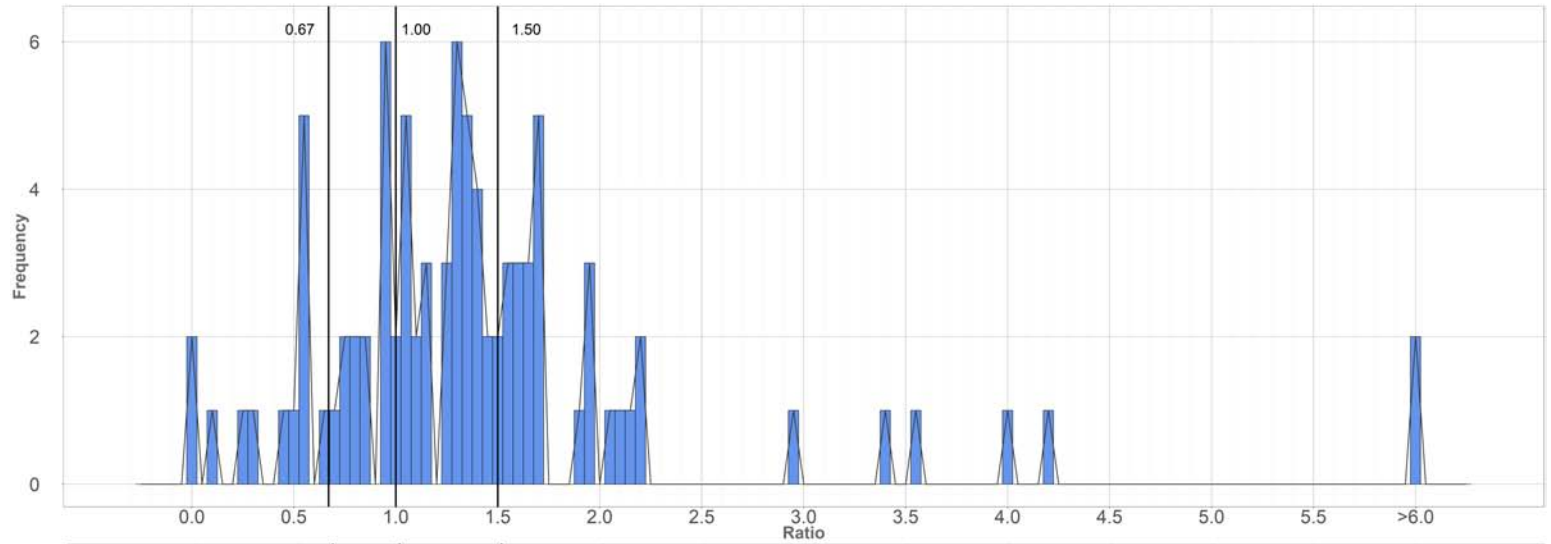

*trans*

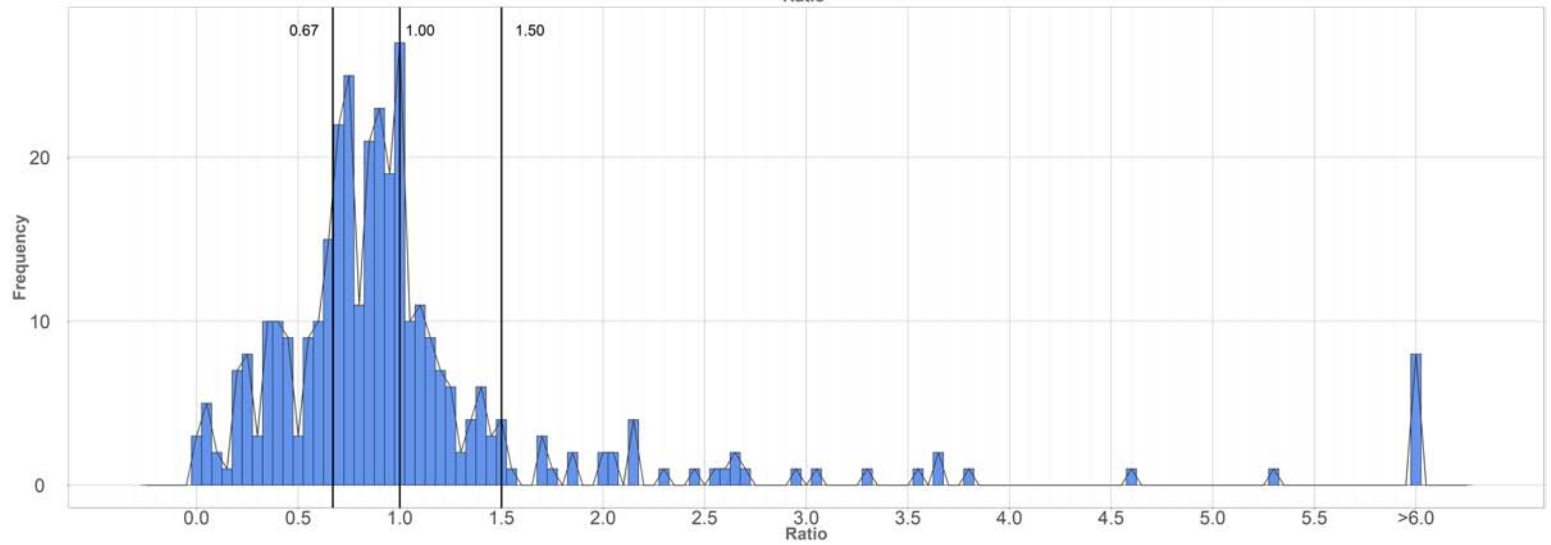

# Trisomy 4: Peroxisome-targeted genes

*cis*

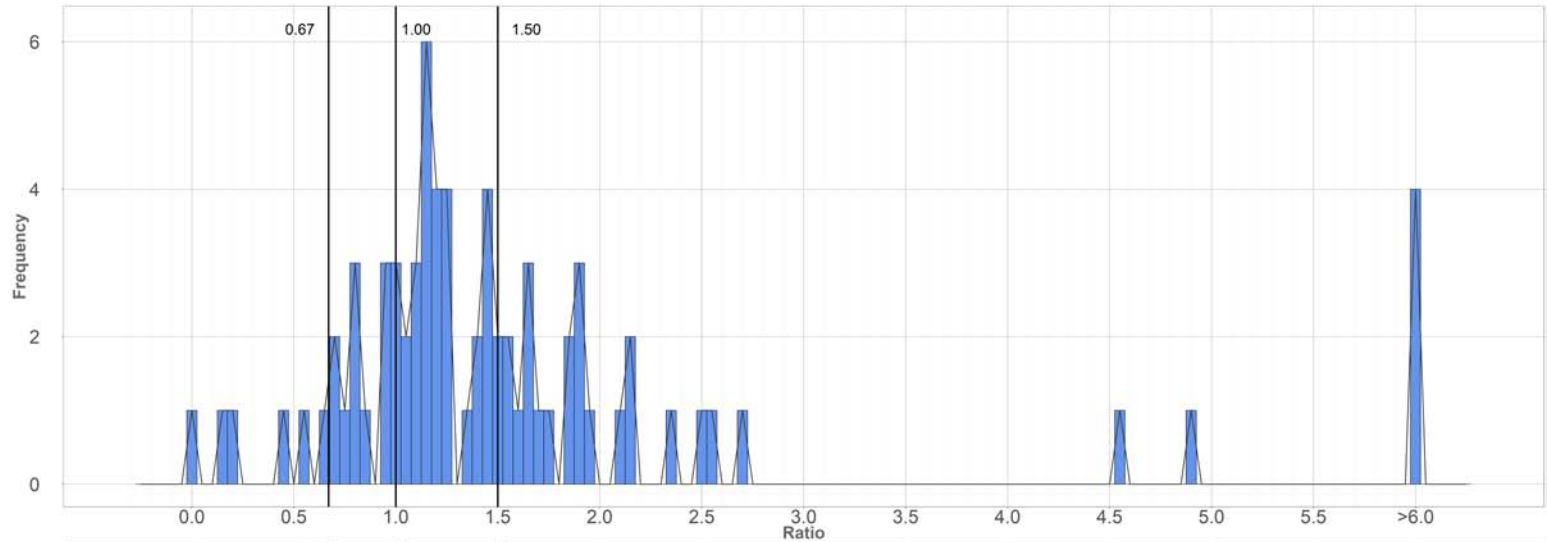

*trans*

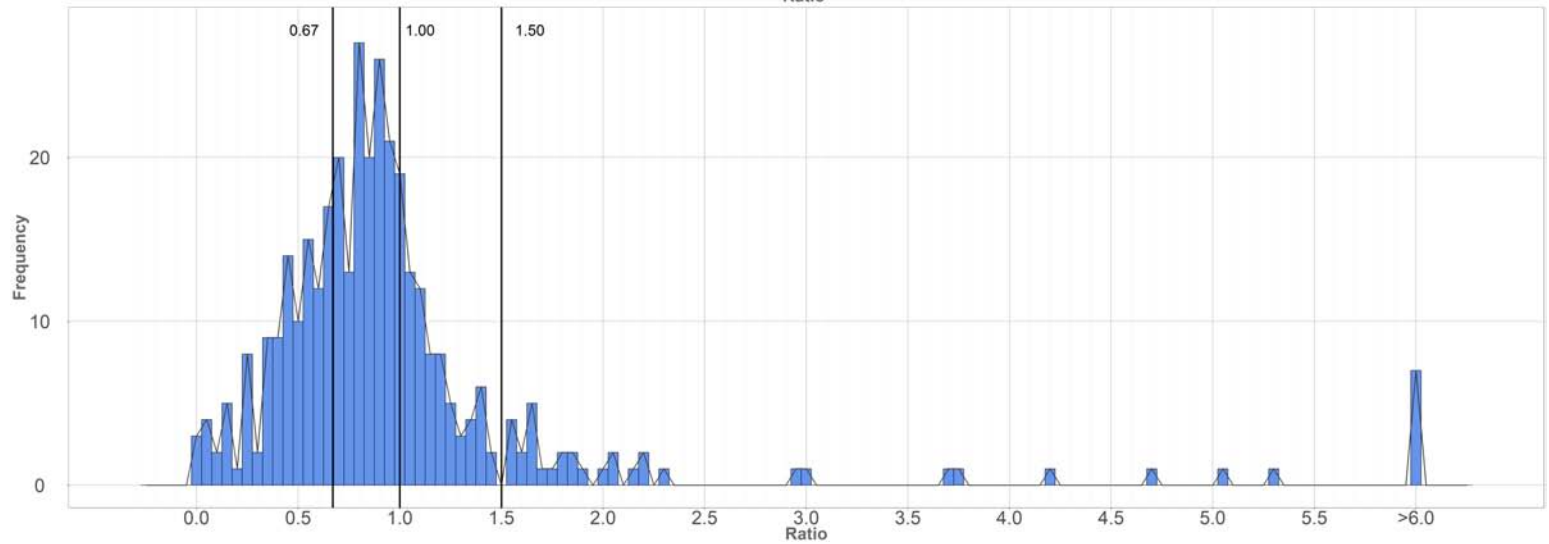

# Trisomy 5: Peroxisome-targeted genes

*cis*

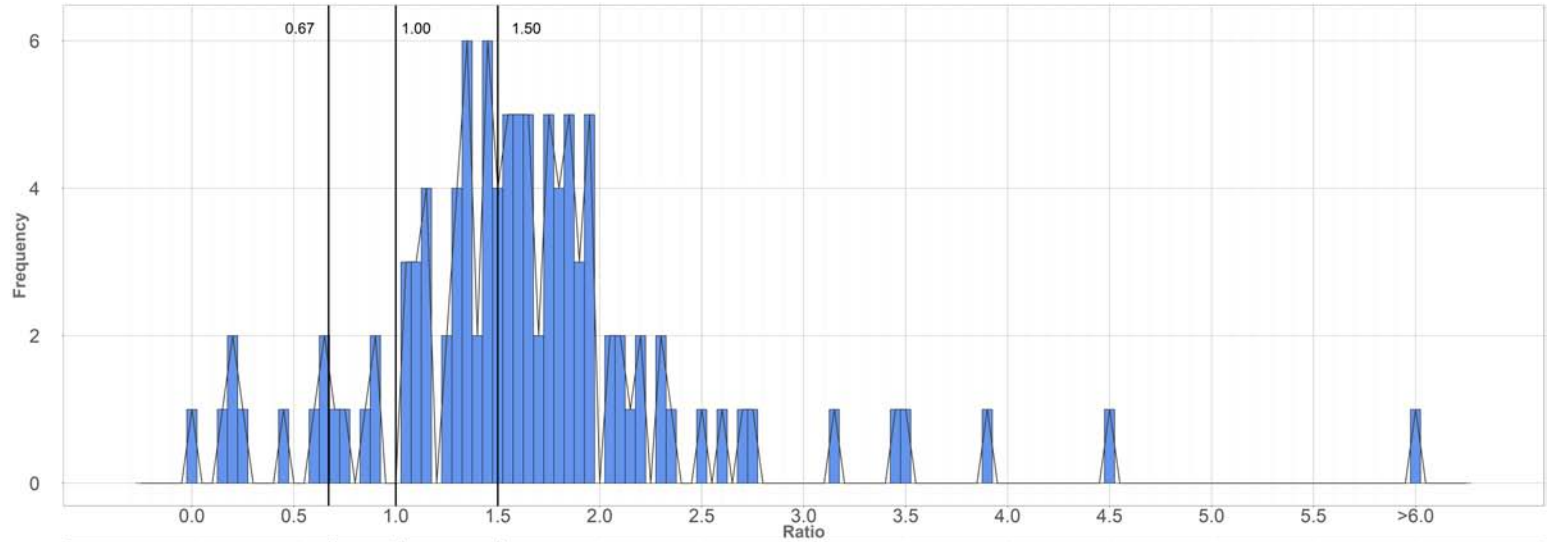

*trans*

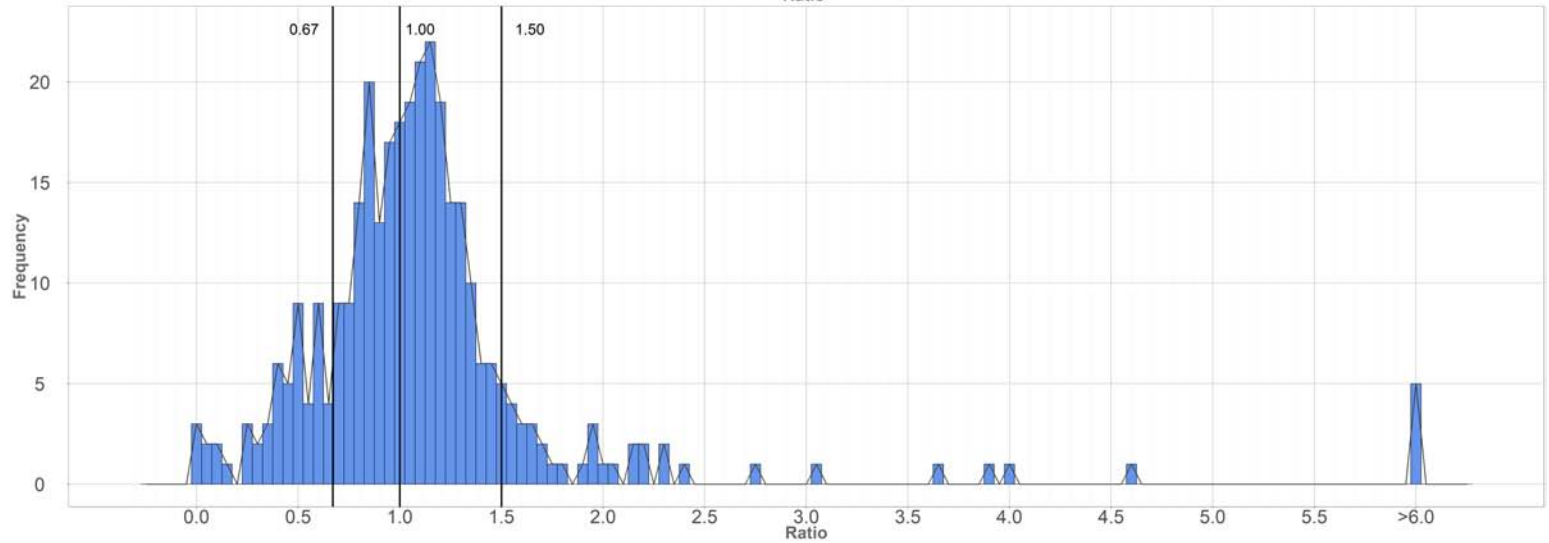

# Peroxisome-targeted genes

Triploid

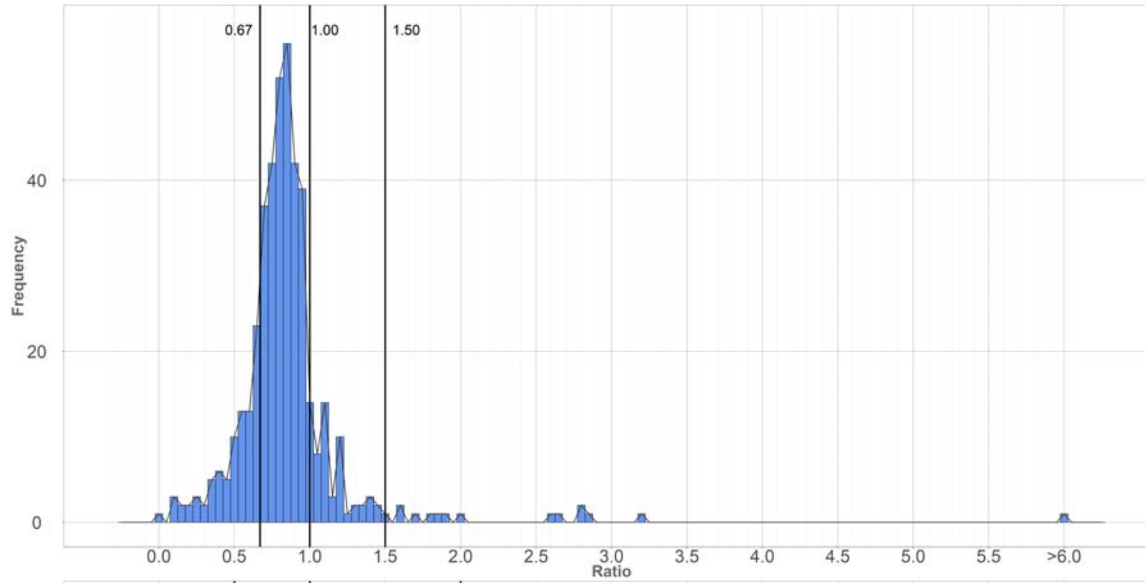

Tetraploid

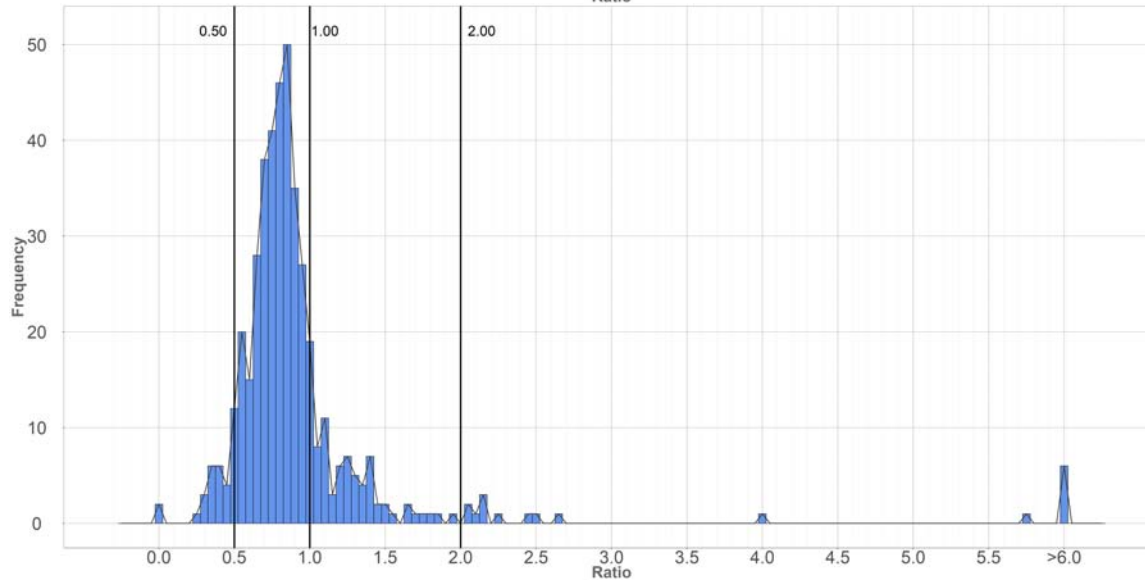

# Trisomy 1: Mitochondrial-targeted genes

*cis*

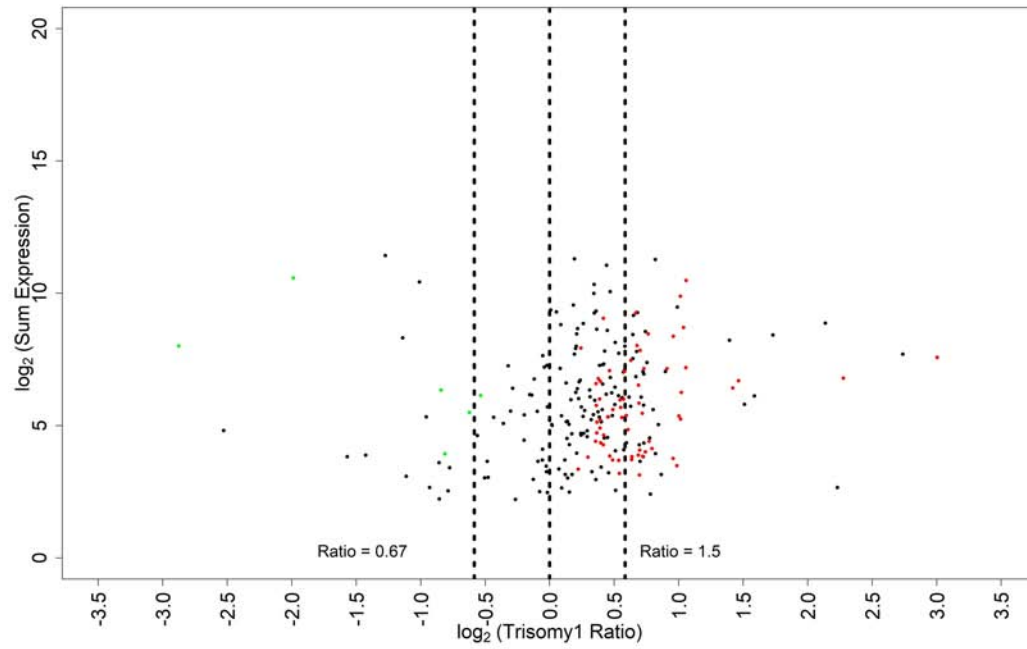

*trans*

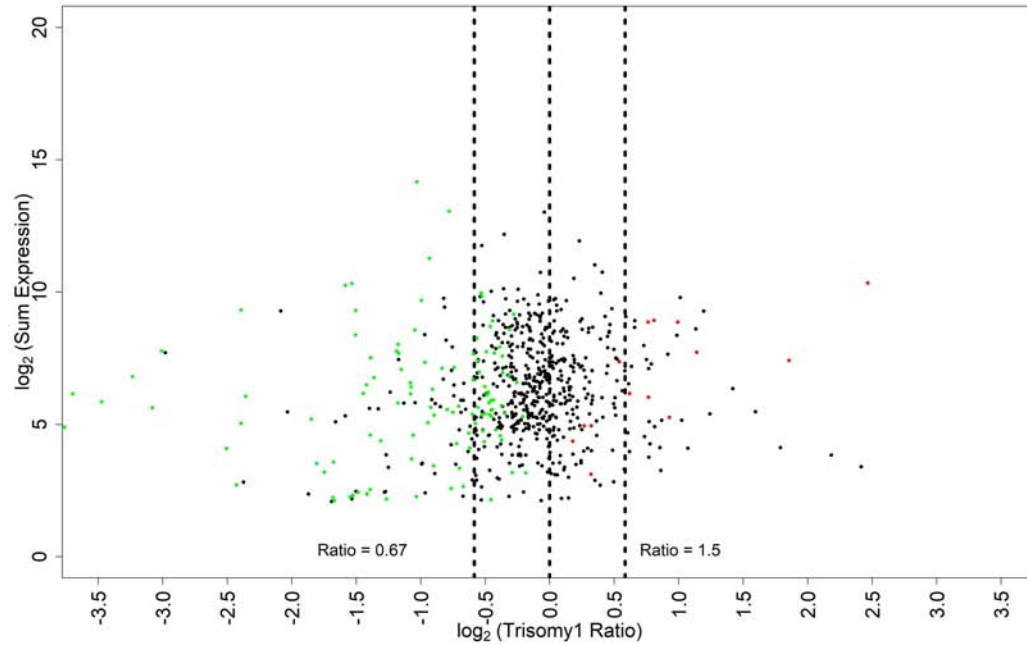



# Trisomy 2: Mitochondrial-targeted genes

*cis*

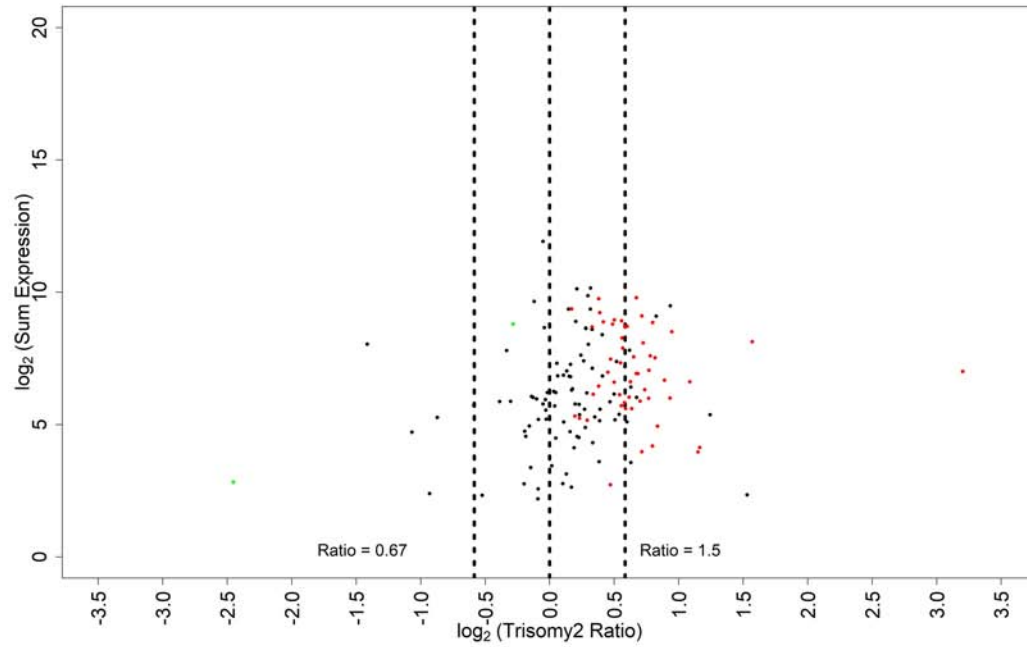

*trans*

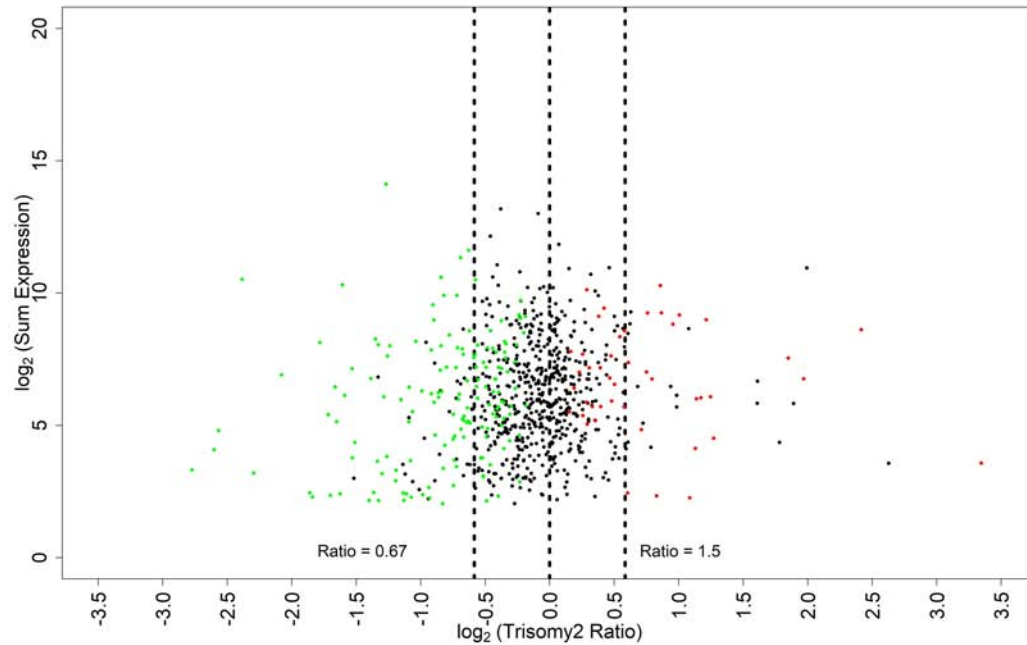

# Trisomy 3: Mitochondrial-targeted genes

*cis*

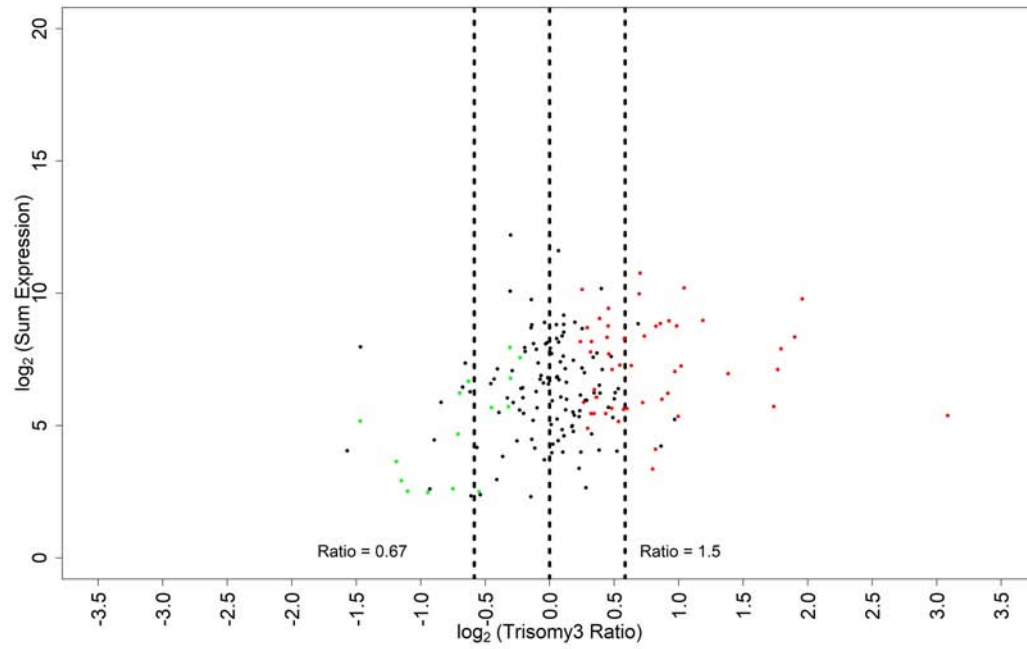

*trans*

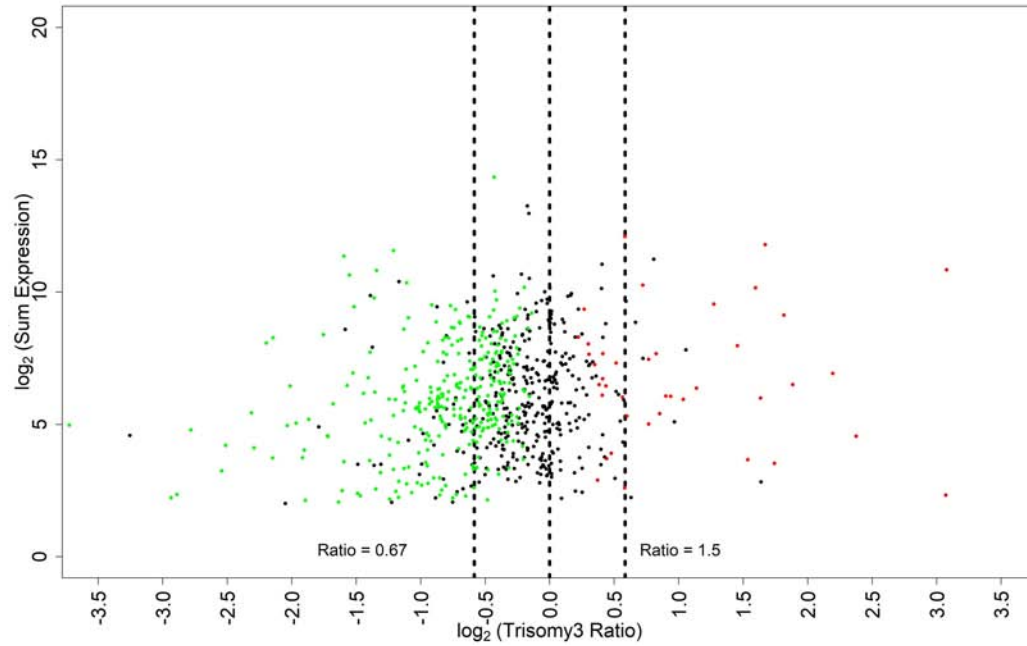

# Trisomy 4: Mitochondrial-targeted genes

*cis*

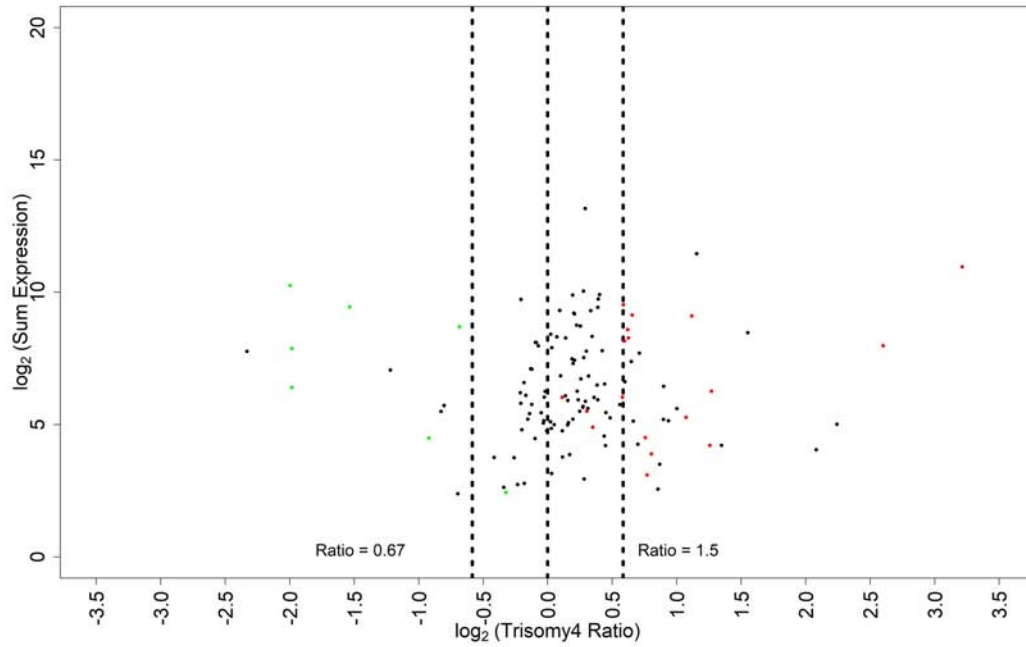

*trans*

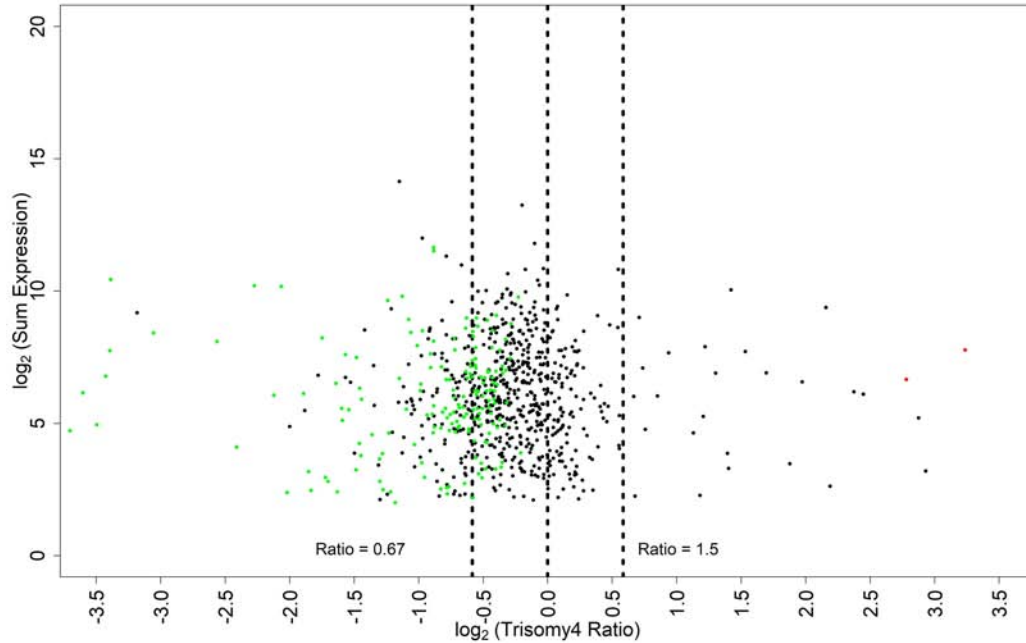

# Trisomy 5: Mitochondrial-targeted genes

*cis*

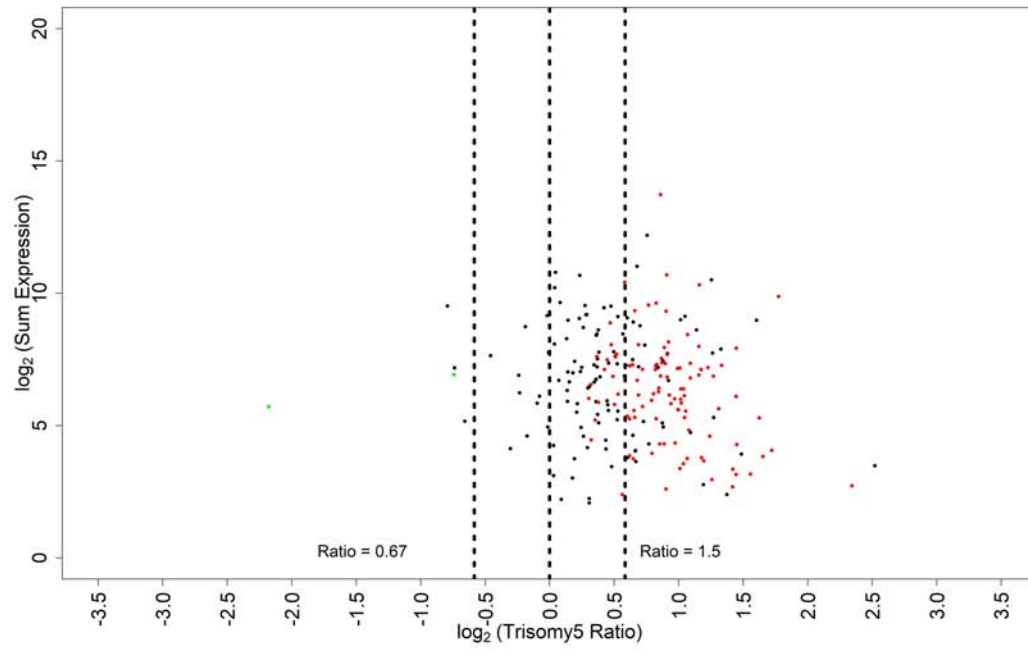

*trans*

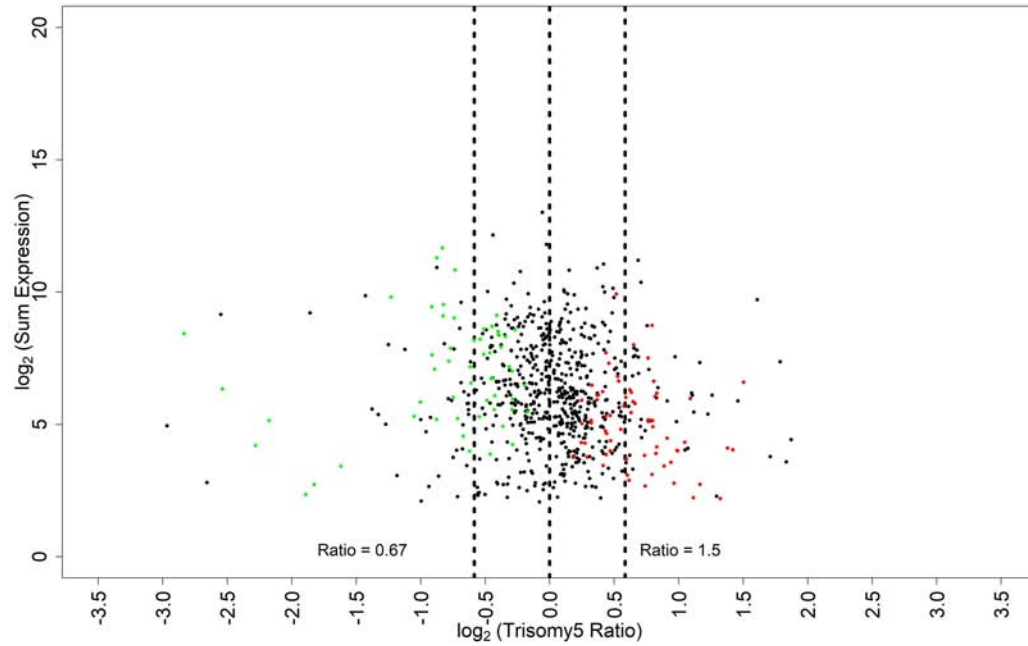

# Mitochondrial-targeted genes

Triploid

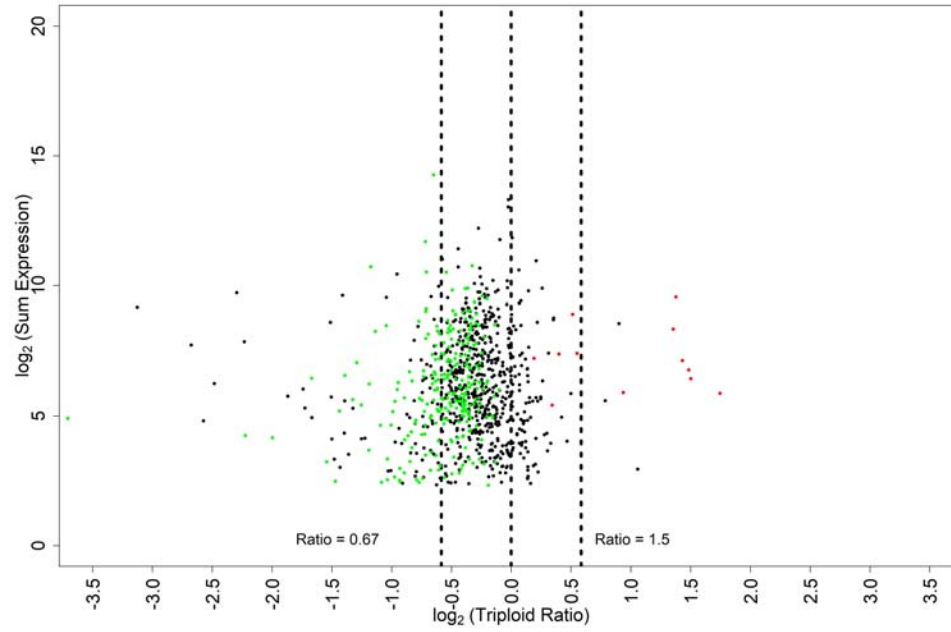

Tetraploid

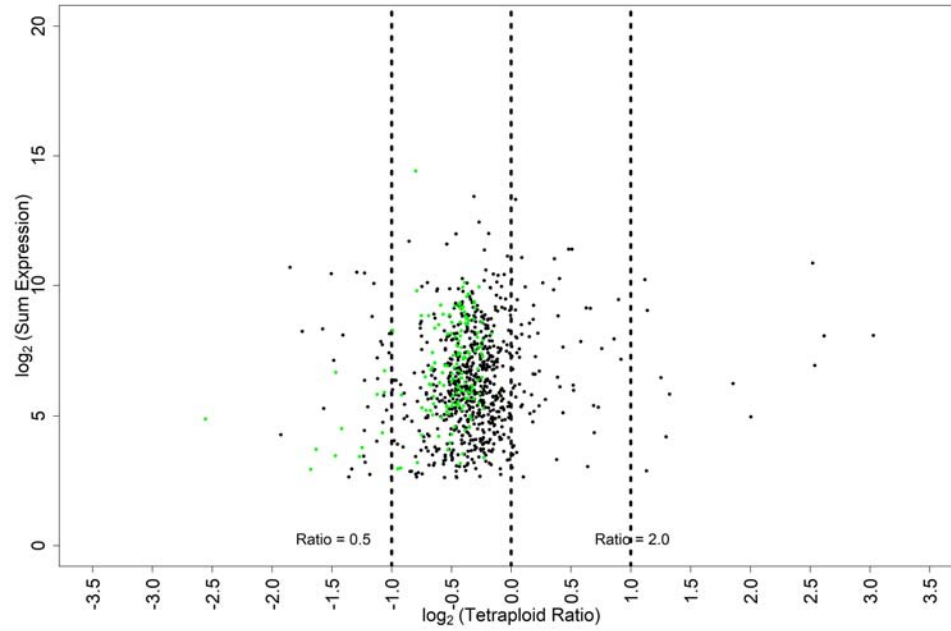

# Trisomy 1: Peroxisome-targeted genes

*cis*

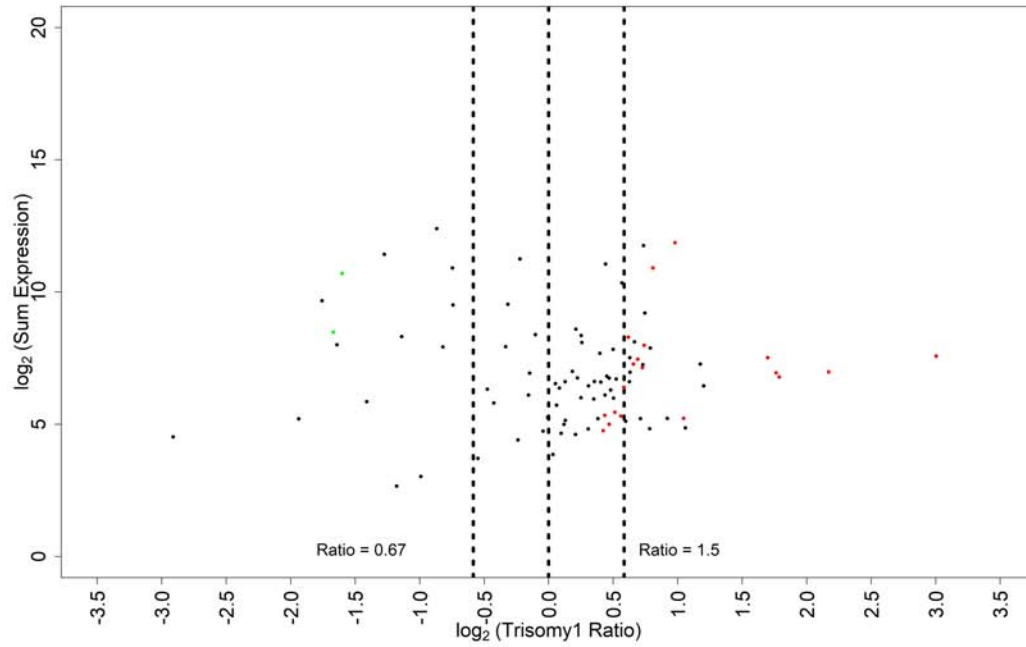

*trans*

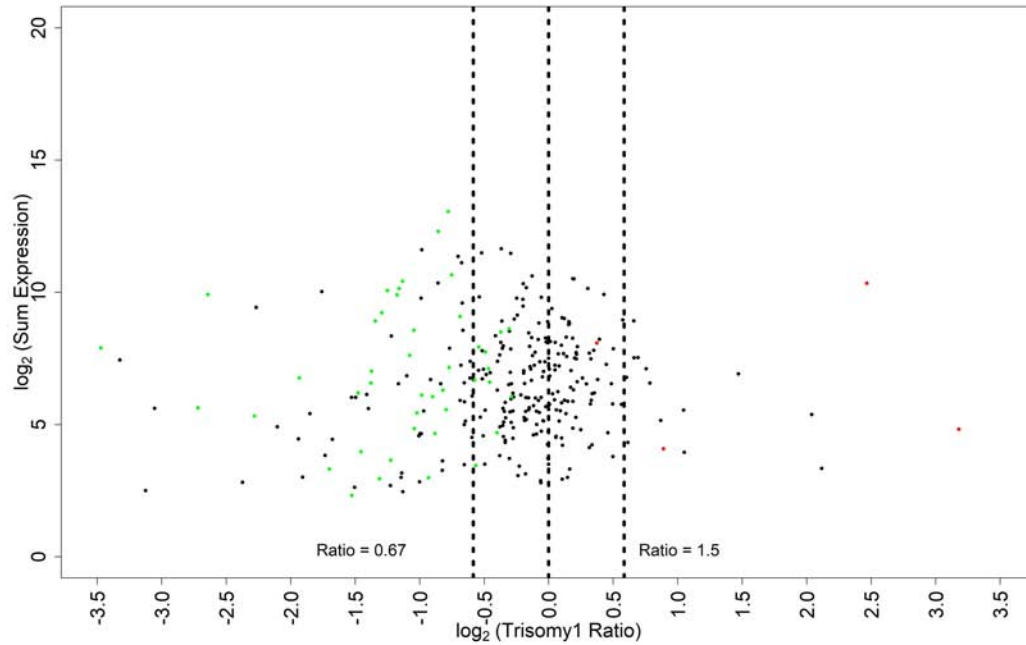

# Trisomy 2: Peroxisome-targeted genes

*cis*

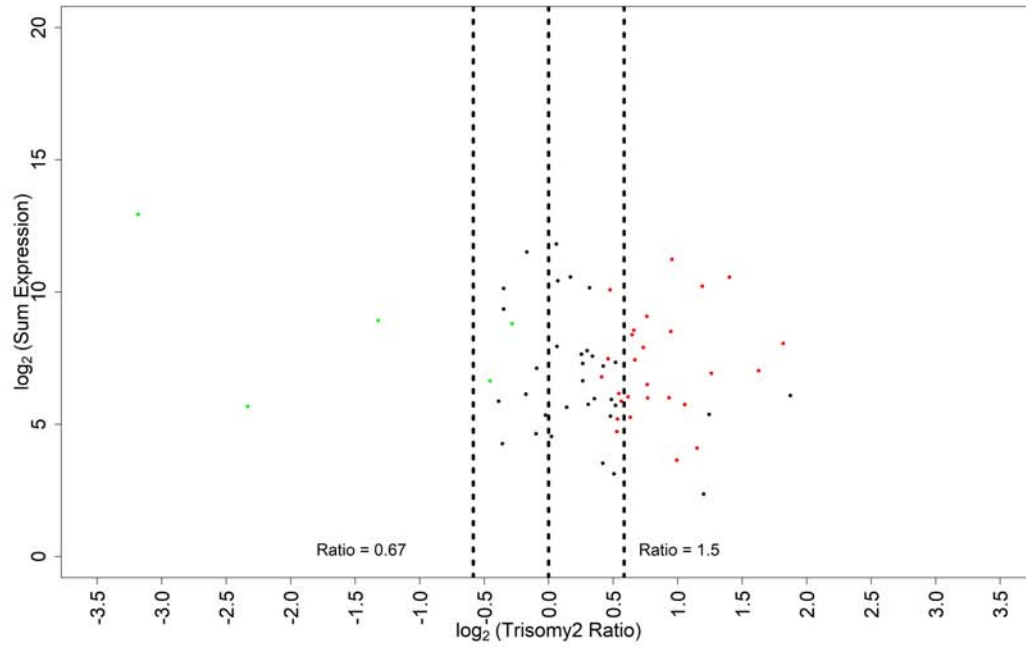

*trans*

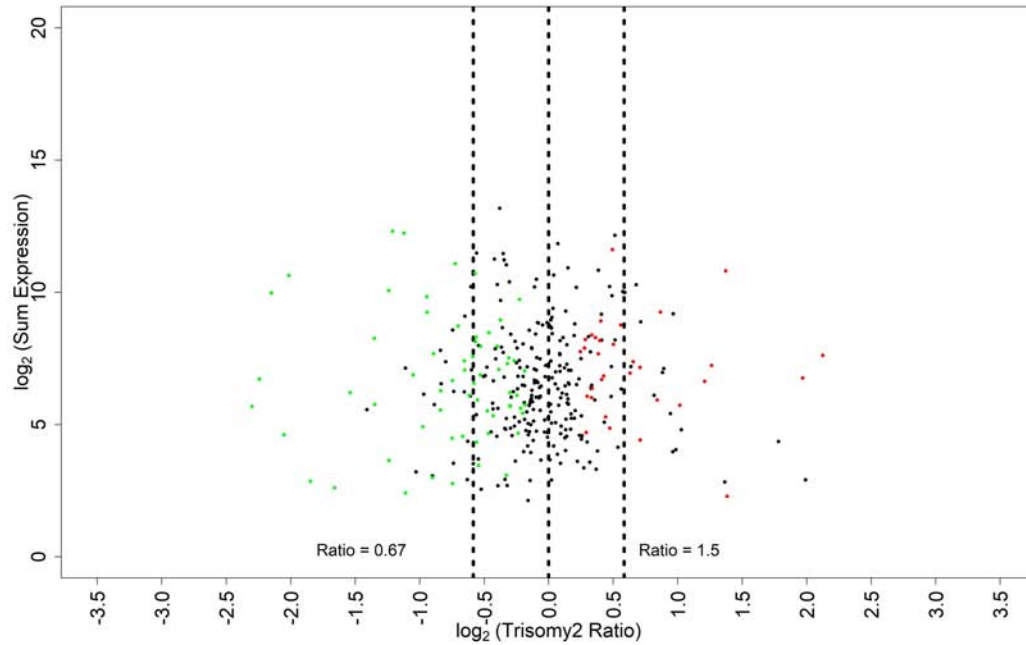

# Trisomy 3: Peroxisome-targeted genes

*cis*

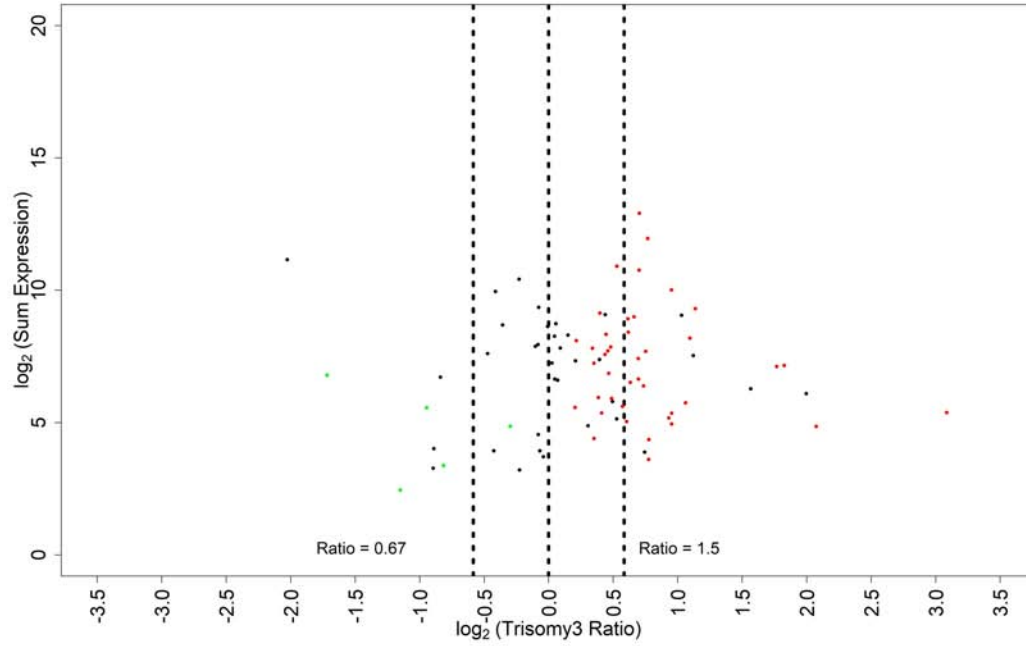

*trans*

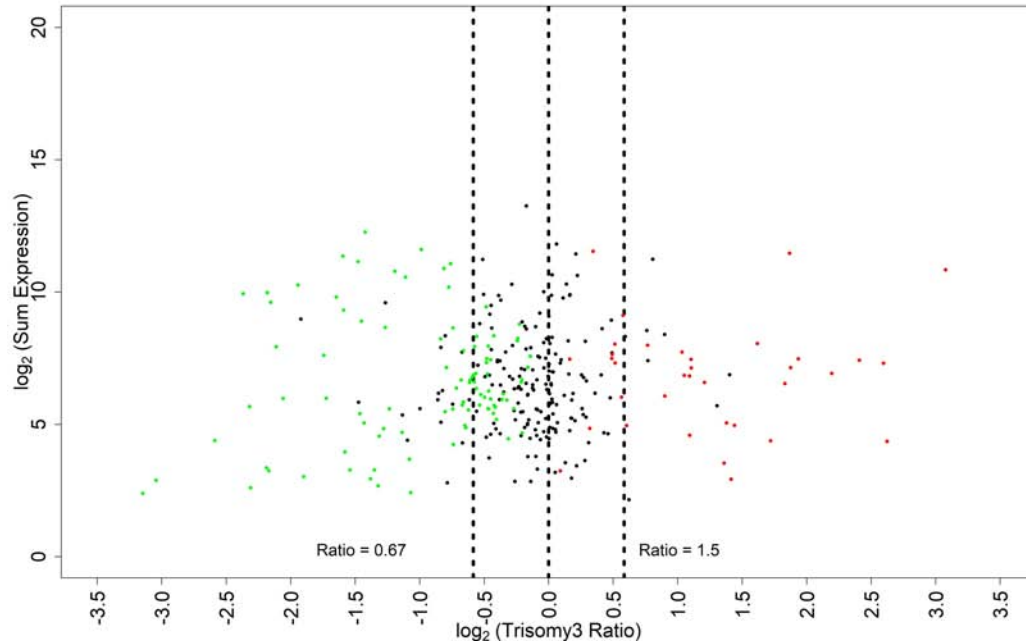



# Trisomy 4: Peroxisome-targeted genes

*cis*

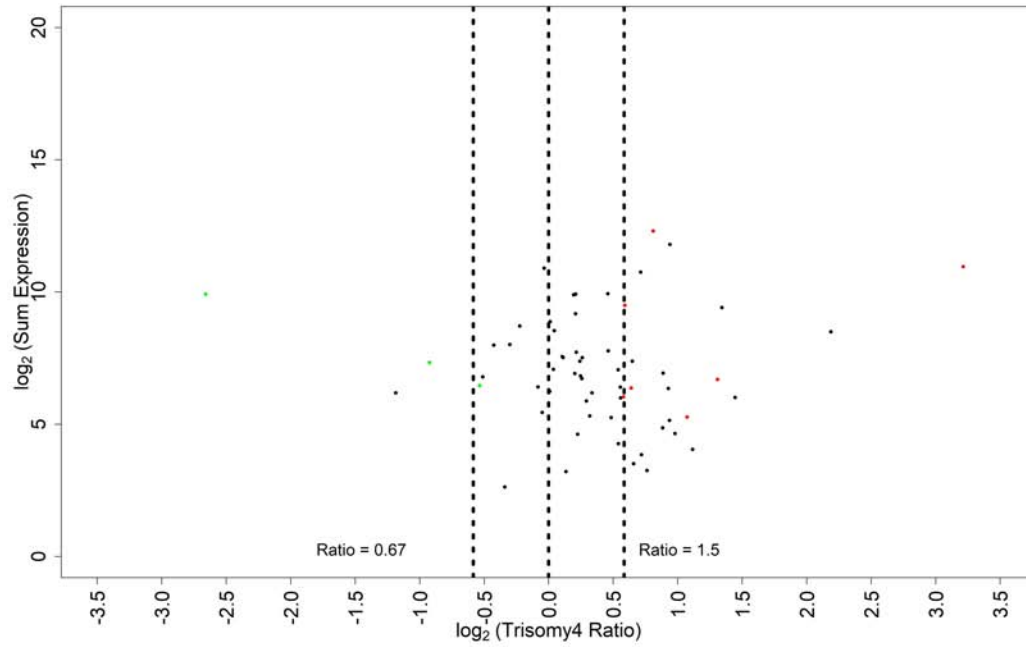

*trans*

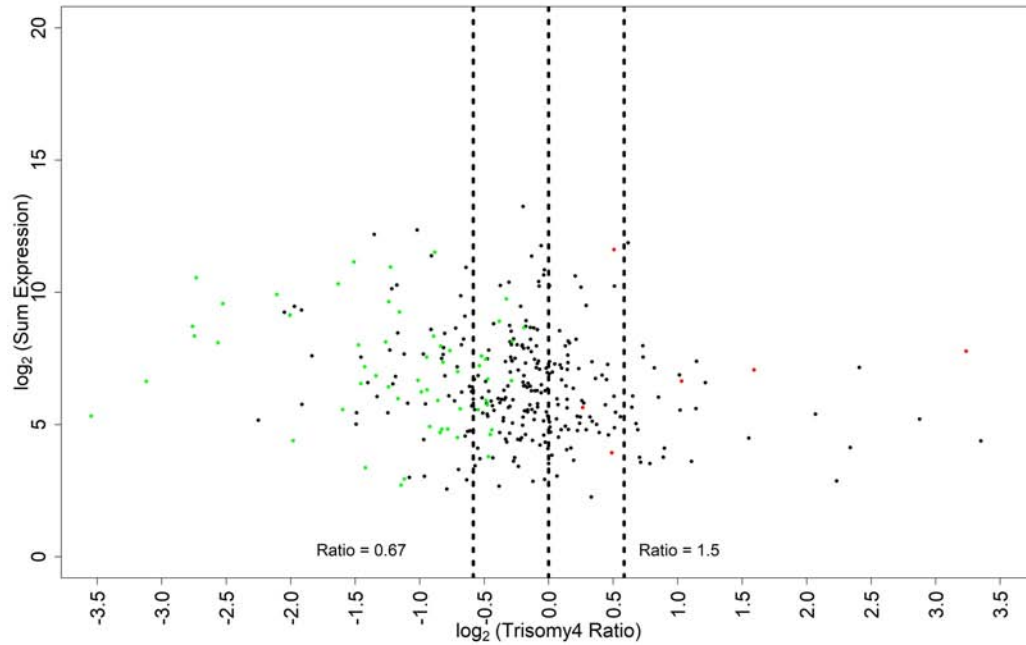

# Trisomy 5: Peroxisome-targeted genes

*cis*

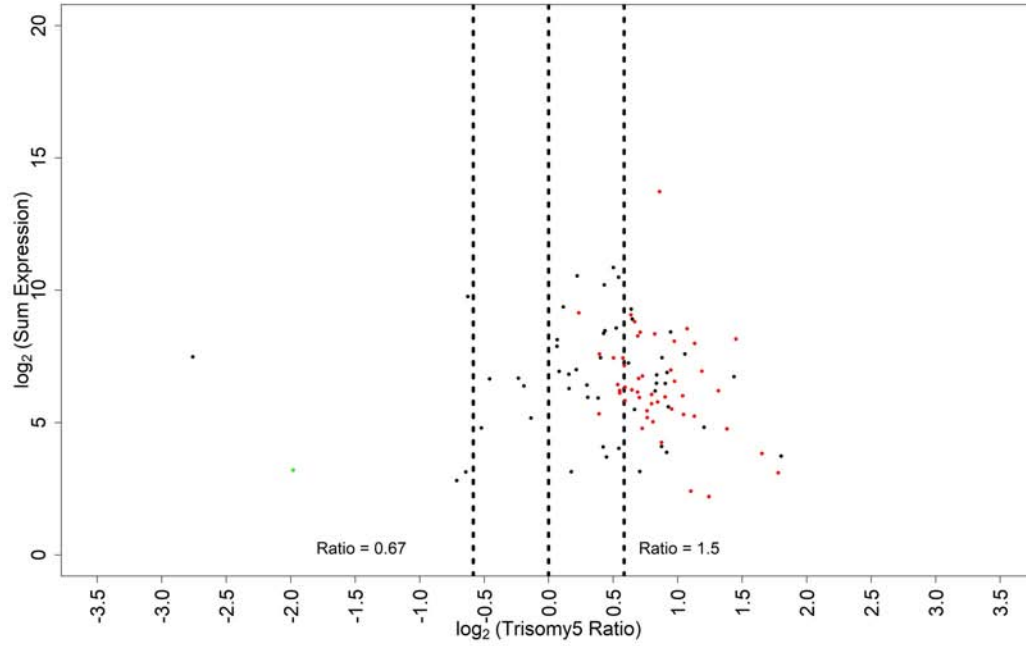

*trans*

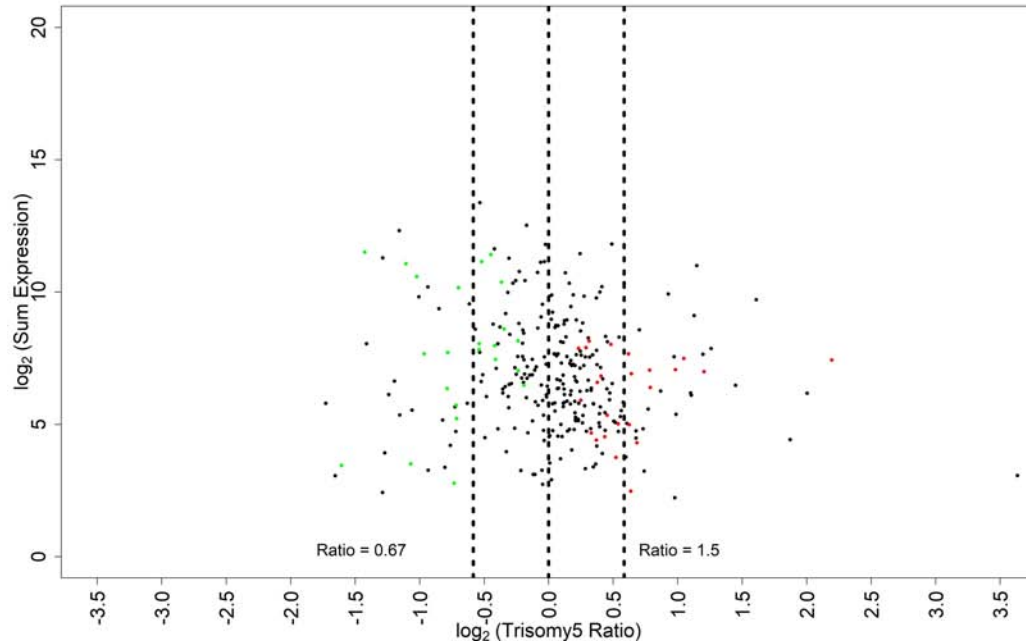

# Peroxisome-targeted genes

Triploid

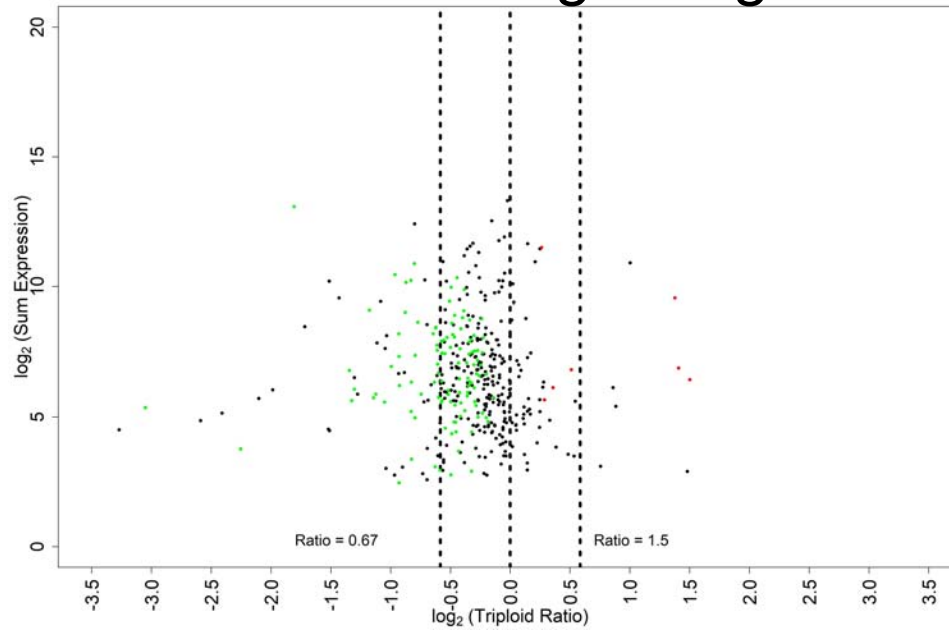

Tetraploid

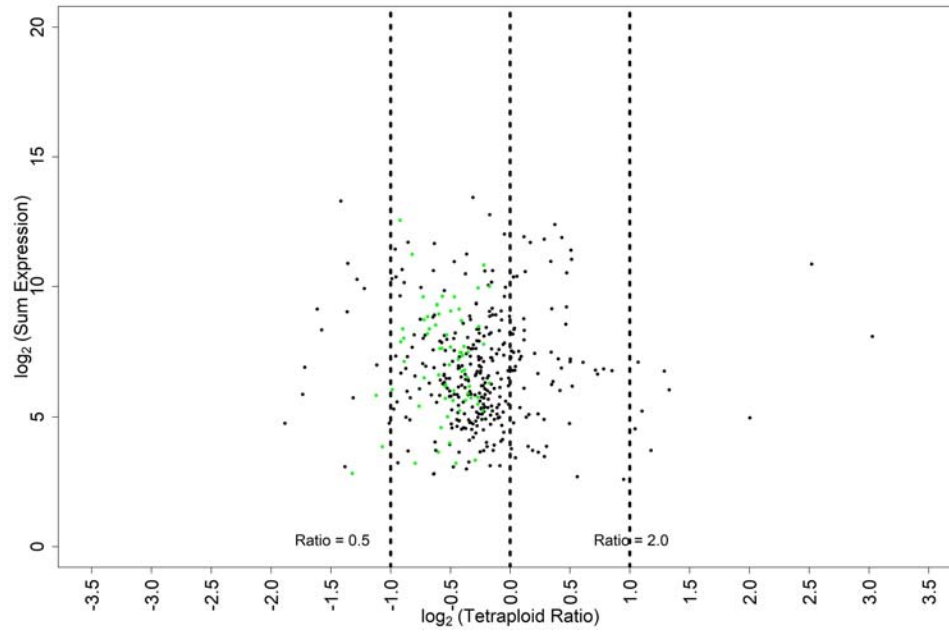

Fig. S12. Ratio distributions of the expression of genes with a shift to CHH methylation in trisomic 4 versus those whose methylation status was unaltered. Distributions were generated as described in Fig. 1.

# Ratio distributions of genes with altered methylation status in trisomic 4

*cis*

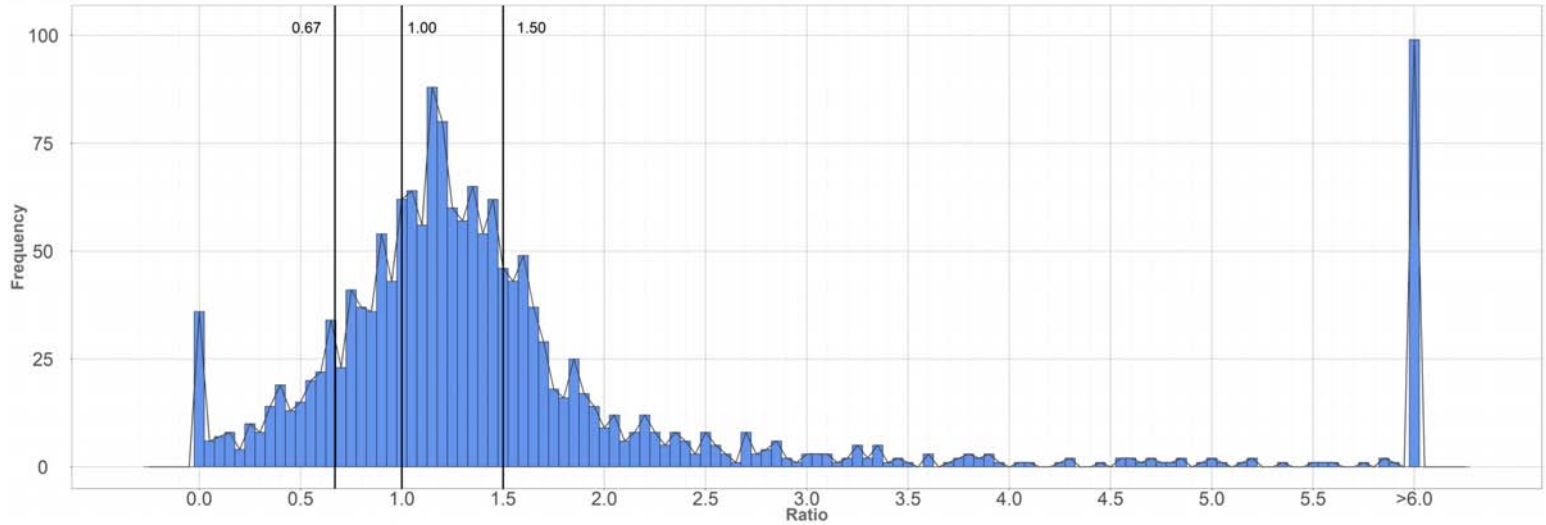

*trans*

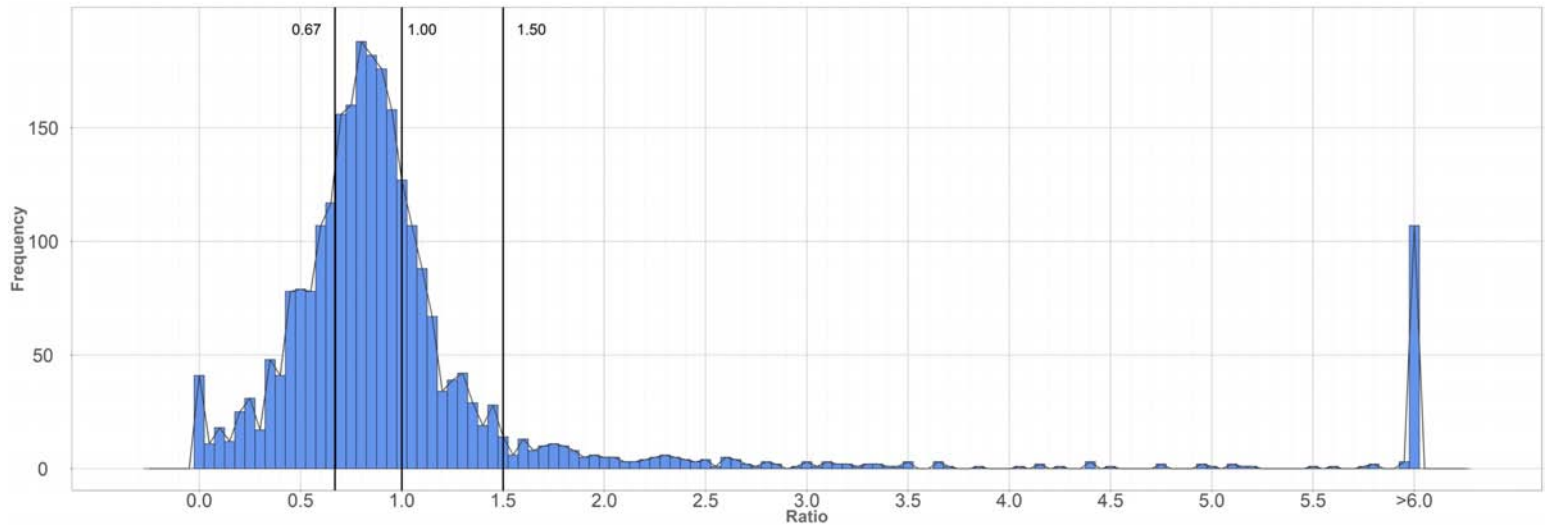

# Ratio distributions of genes with unaltered methylation status in trisomic 4

*cis*

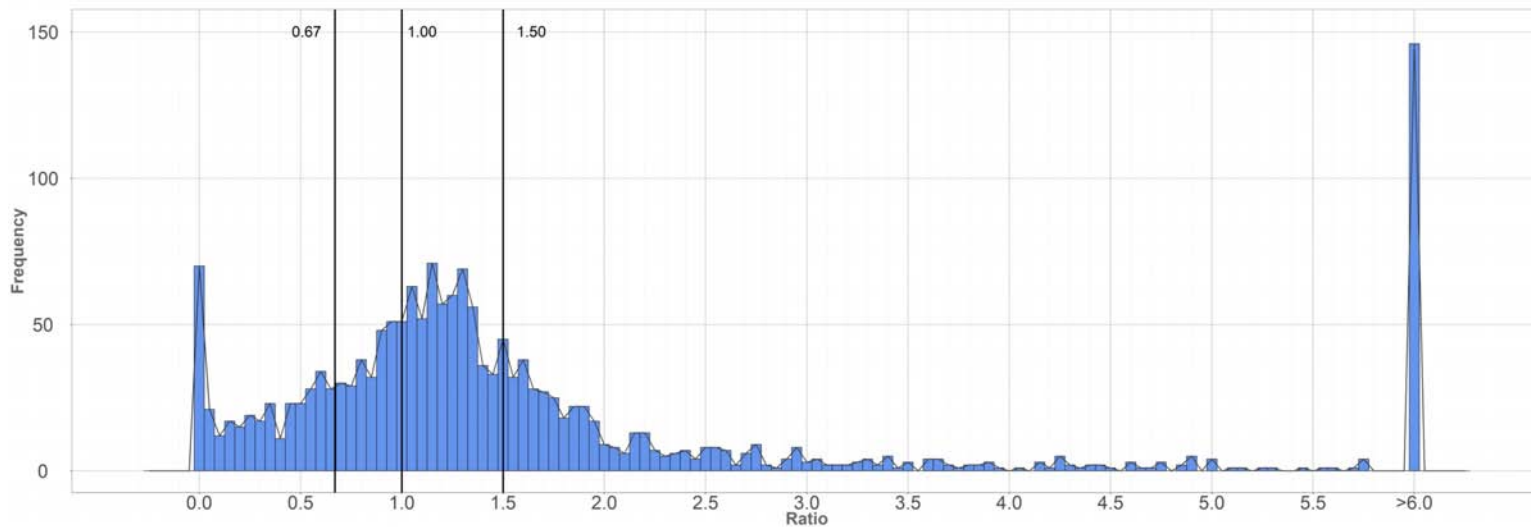

*trans*

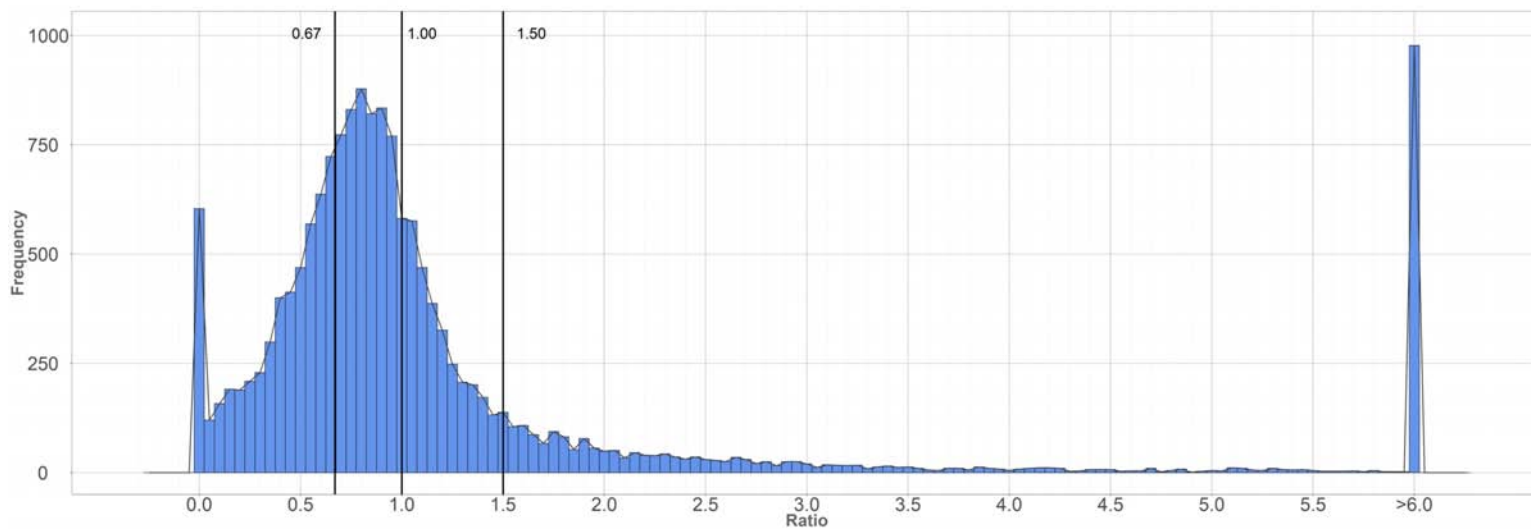

Fig. S13. Ratio distributions and scatter plots for the functional class of gene body methylated genes, CHH methylated genes, and unmethylated genes. Distributions were generated as described in Figure 1 and scatter plots as described in Fig. S2.

# Genes with gbM in both trisomy 1 and diploid

*cis*

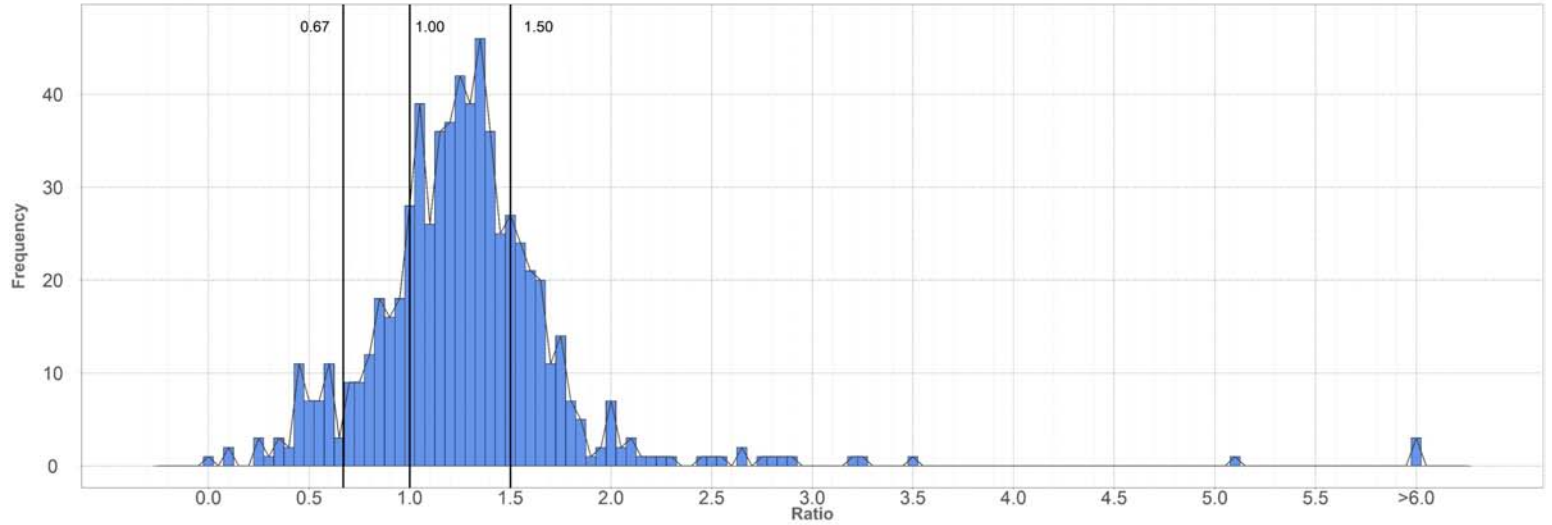

*trans*

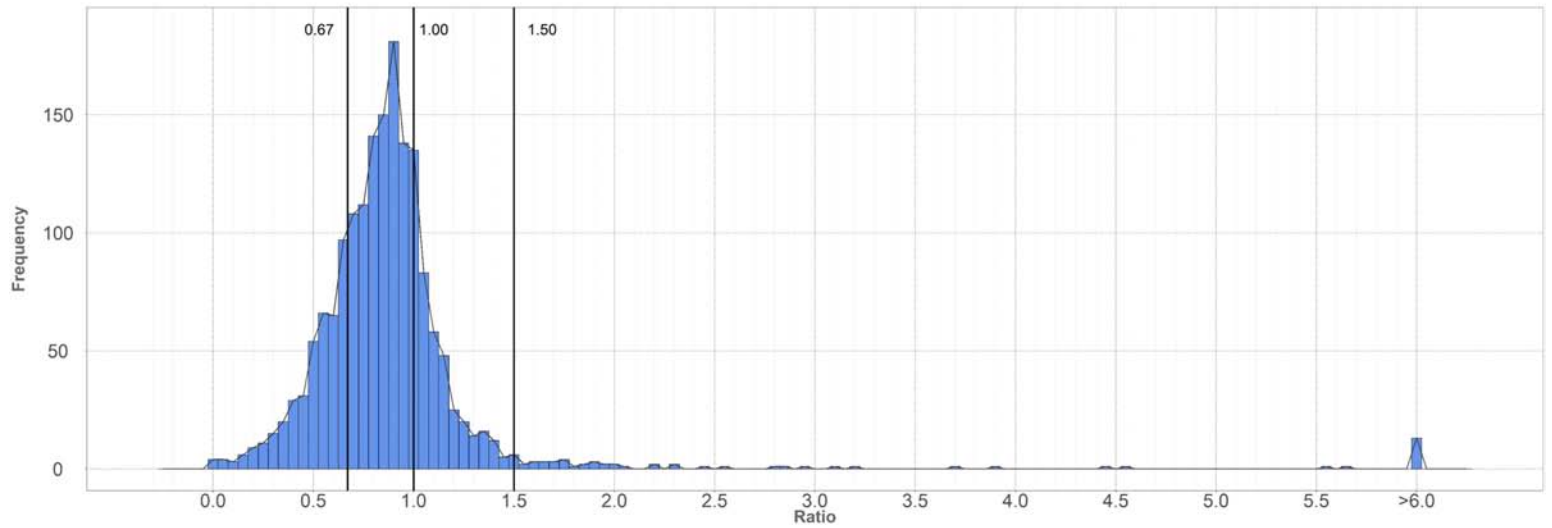



# Genes with gbM in both trisomy 2 and diploid

*cis*

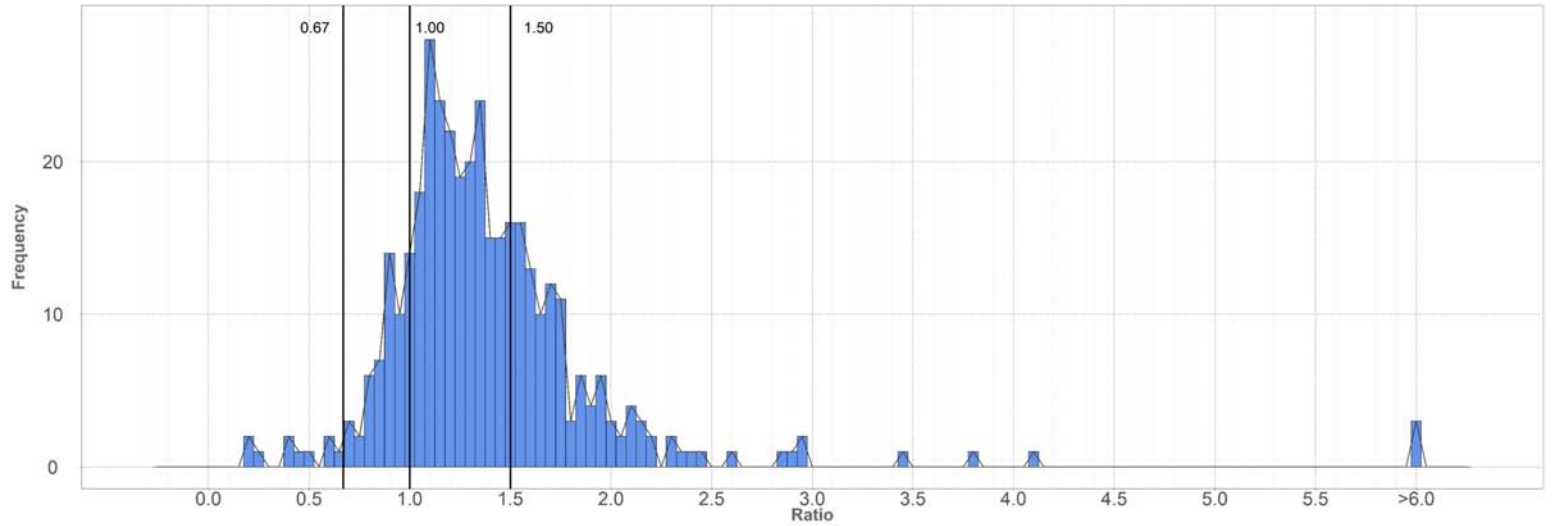

*trans*

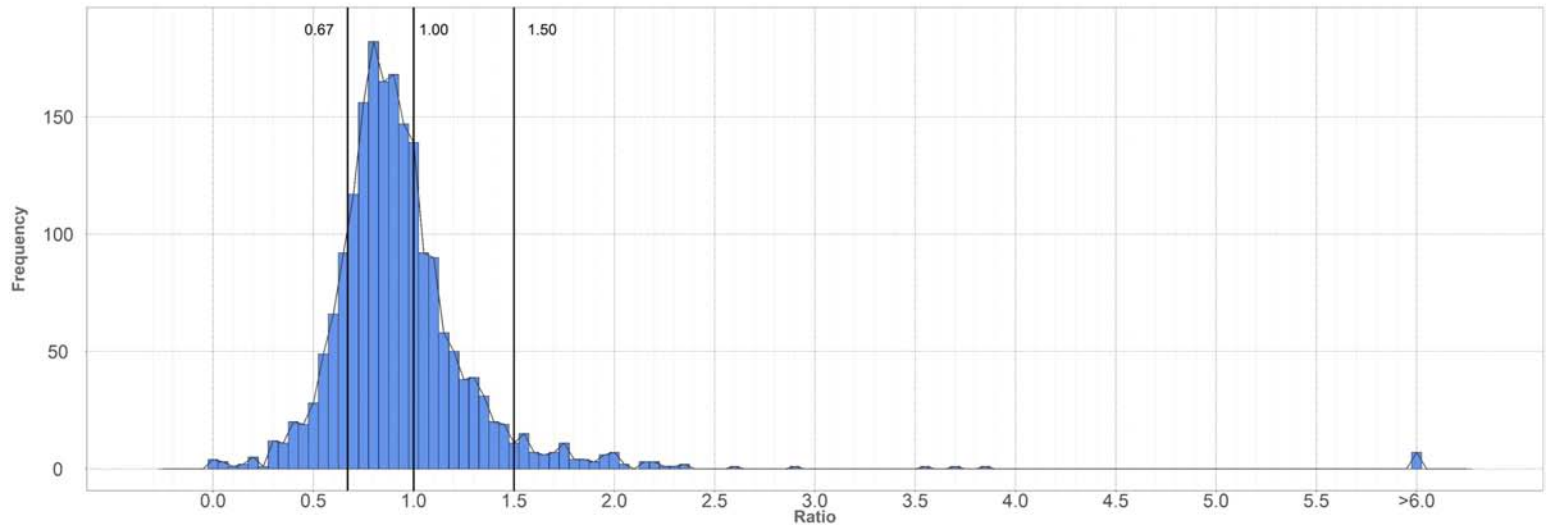

# Genes with gbM in both trisomy 3 and diploid

*cis*

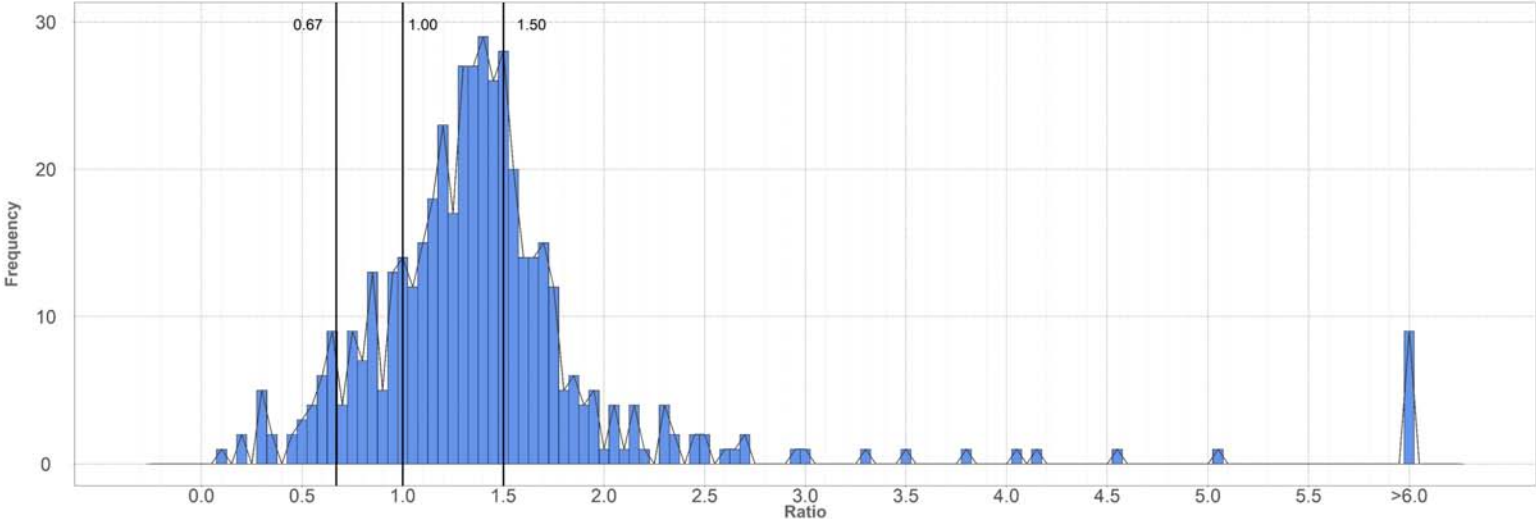

*trans*

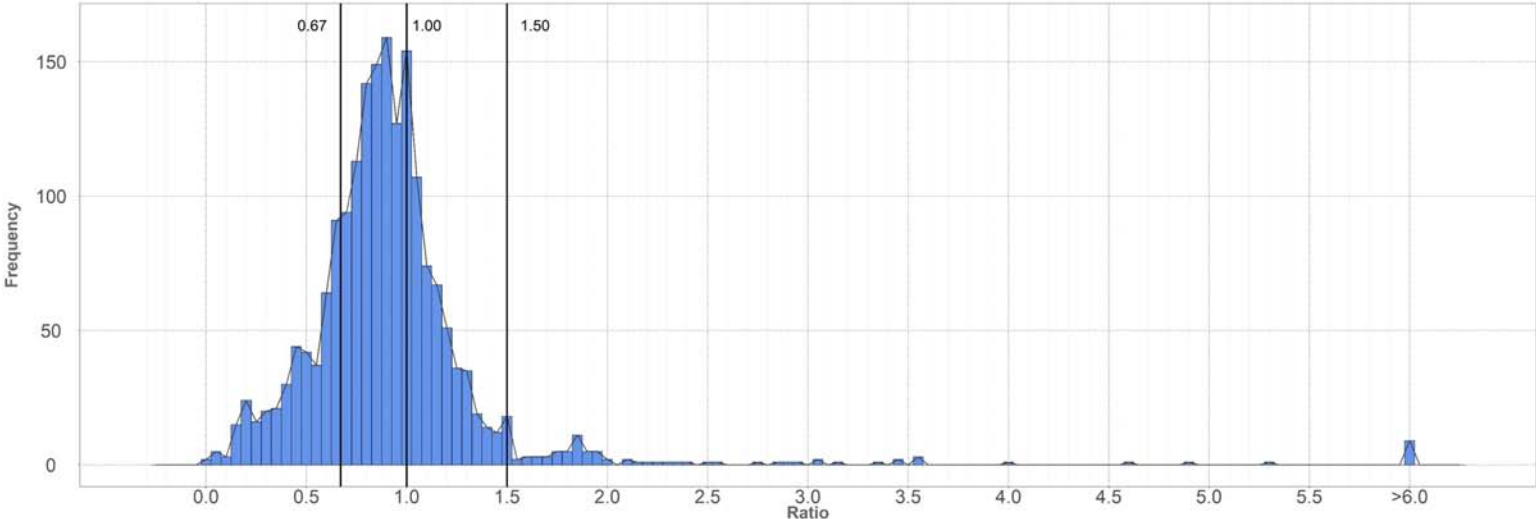

# Genes with gbM in both trisomy 4 and diploid

*cis*

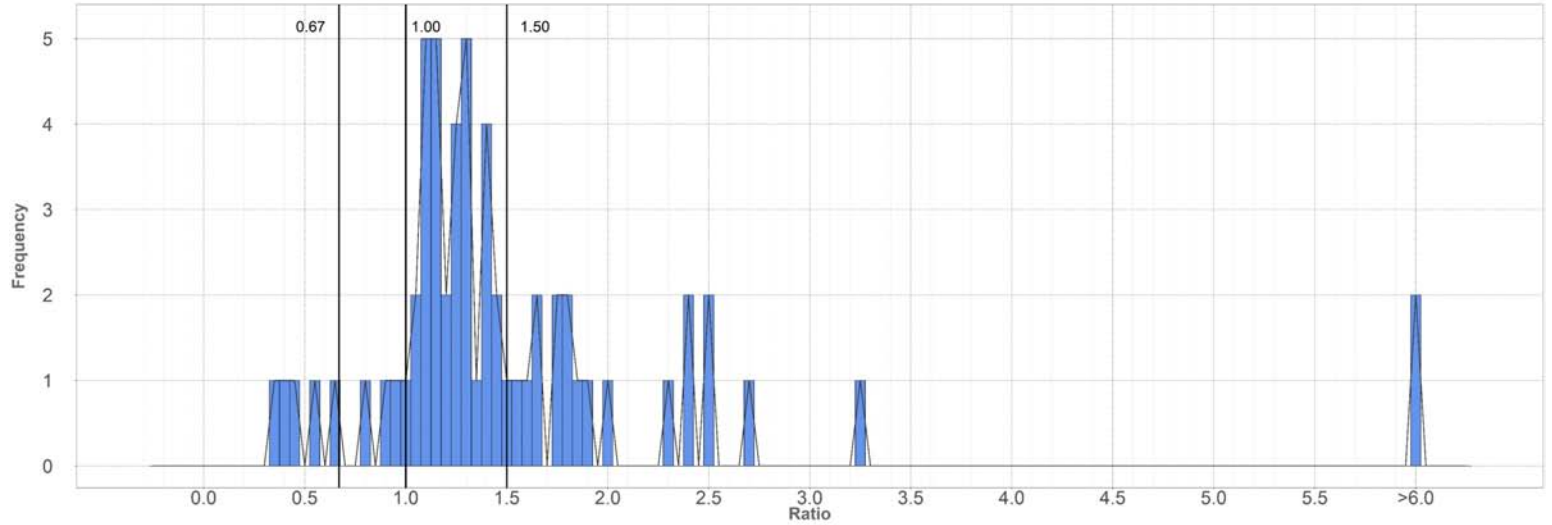

*trans*

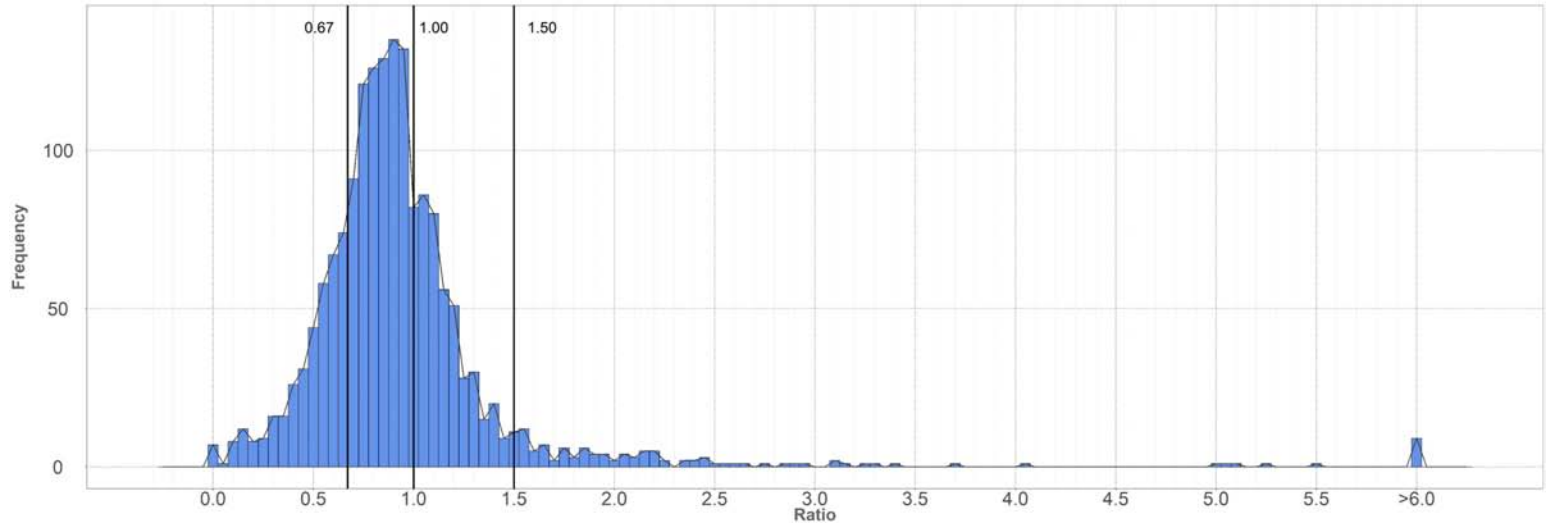

# Genes with gbM in both trisomy 5 and diploid

*cis*

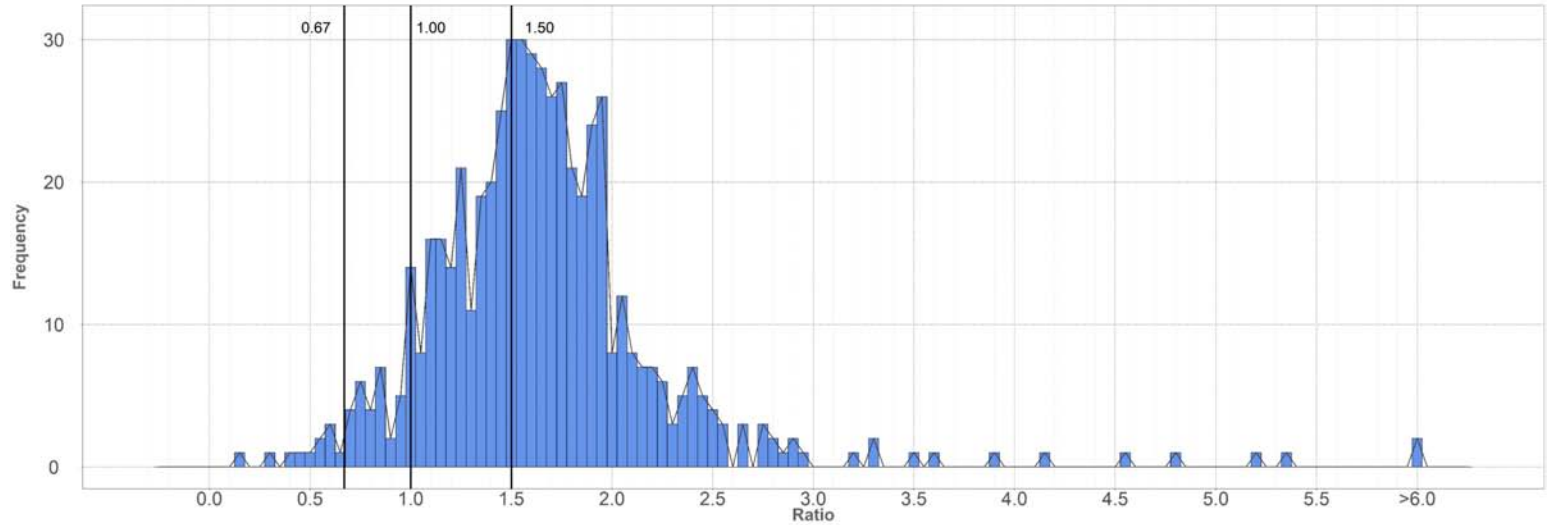

*trans*

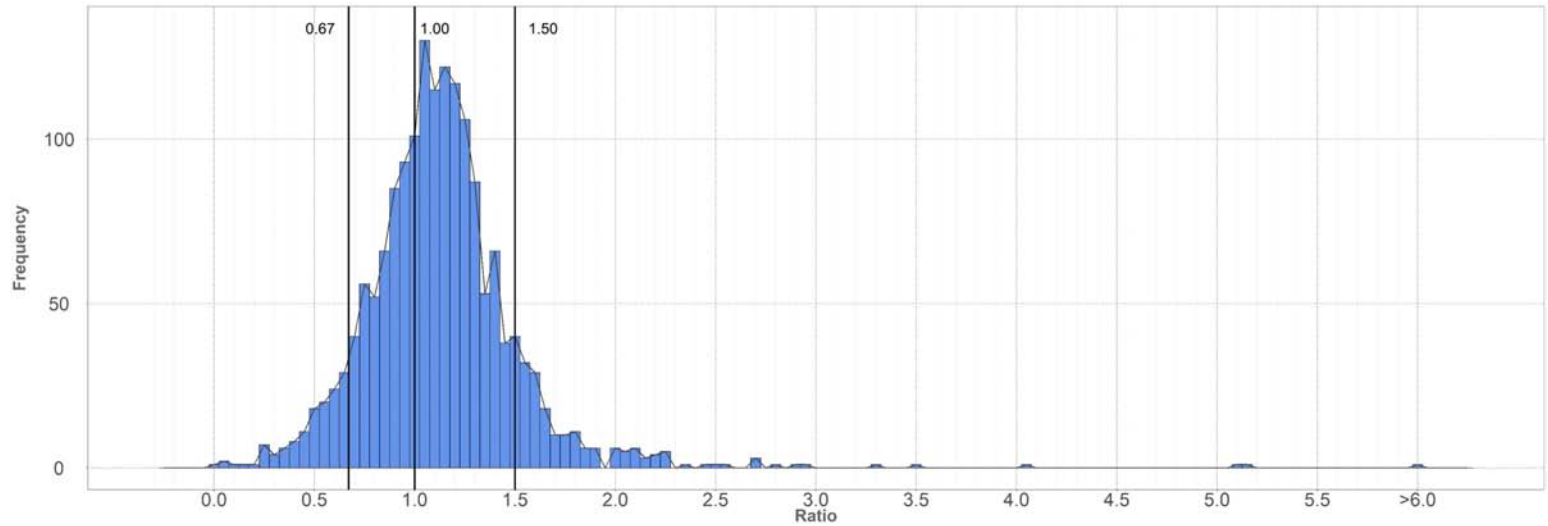

# Genes with mCHH in both trisomy 1 and diploid

*cis*

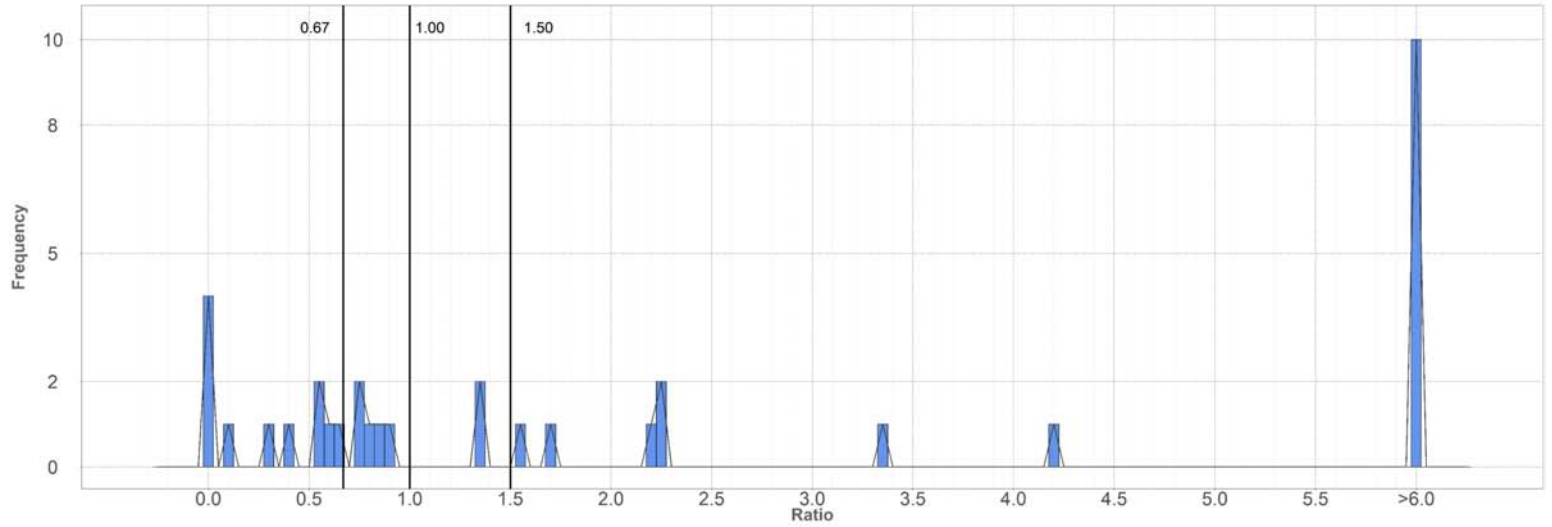

*trans*

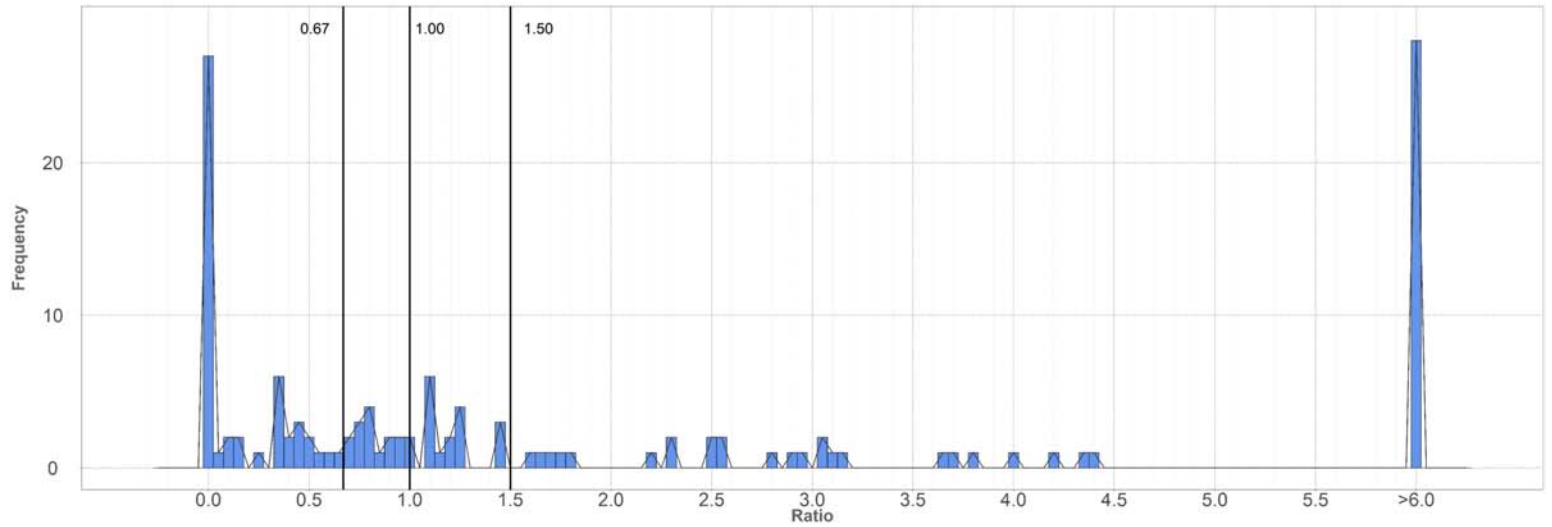

# Genes with mCHH in both trisomy 2 and diploid

*cis*

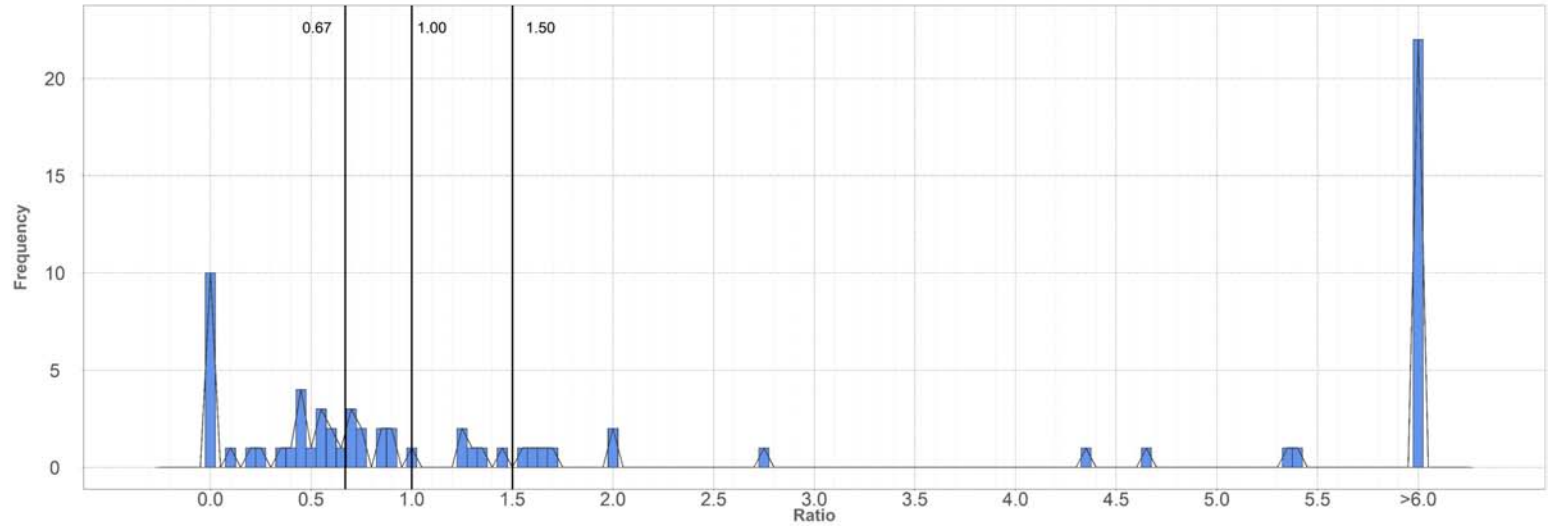

*trans*

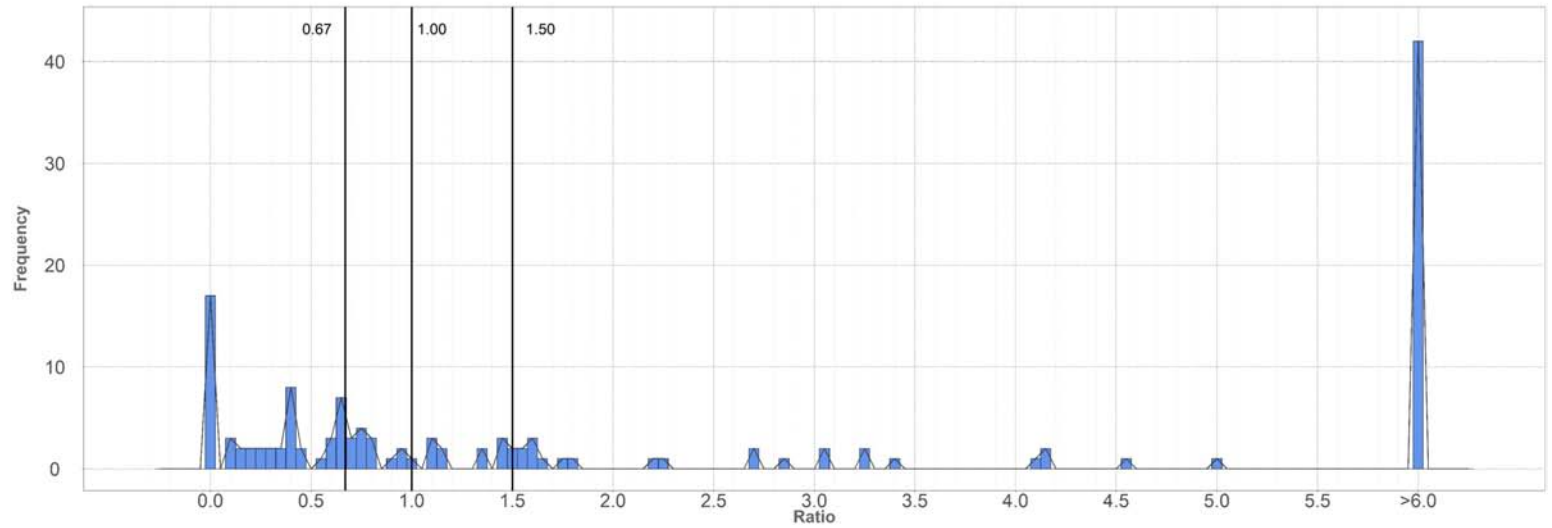

# Genes with mCHH in both trisomy 3 and diploid

*cis*

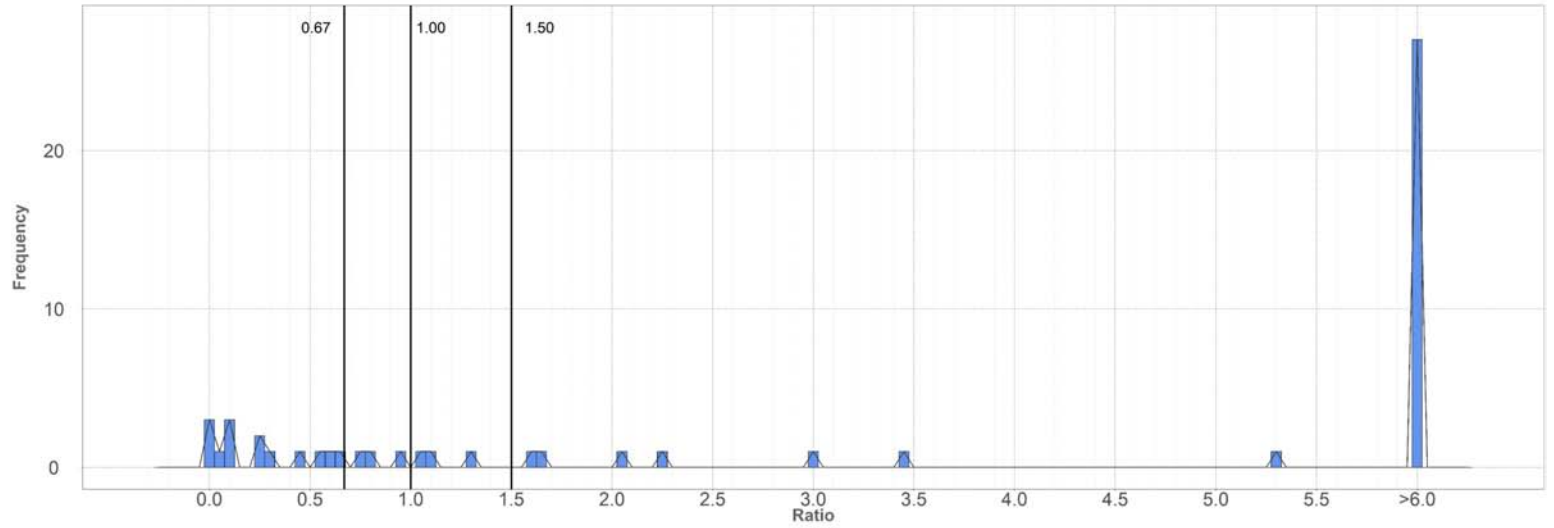

*trans*

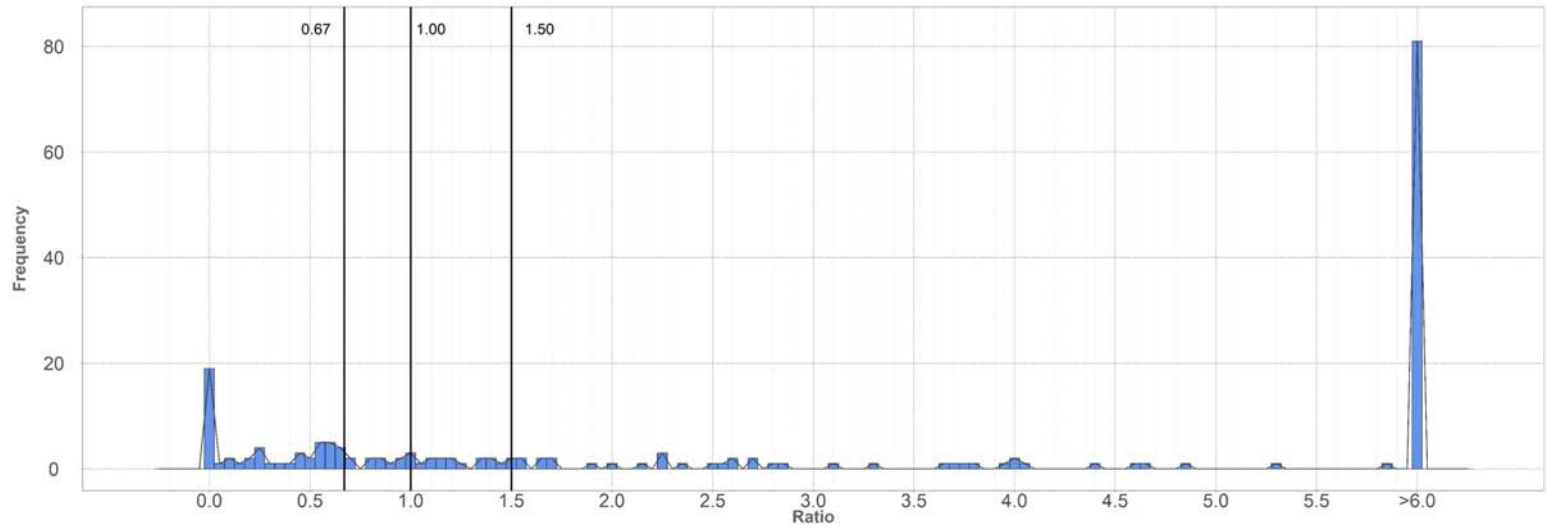

# Genes with mCHH in both trisomy 4 and diploid

*cis*

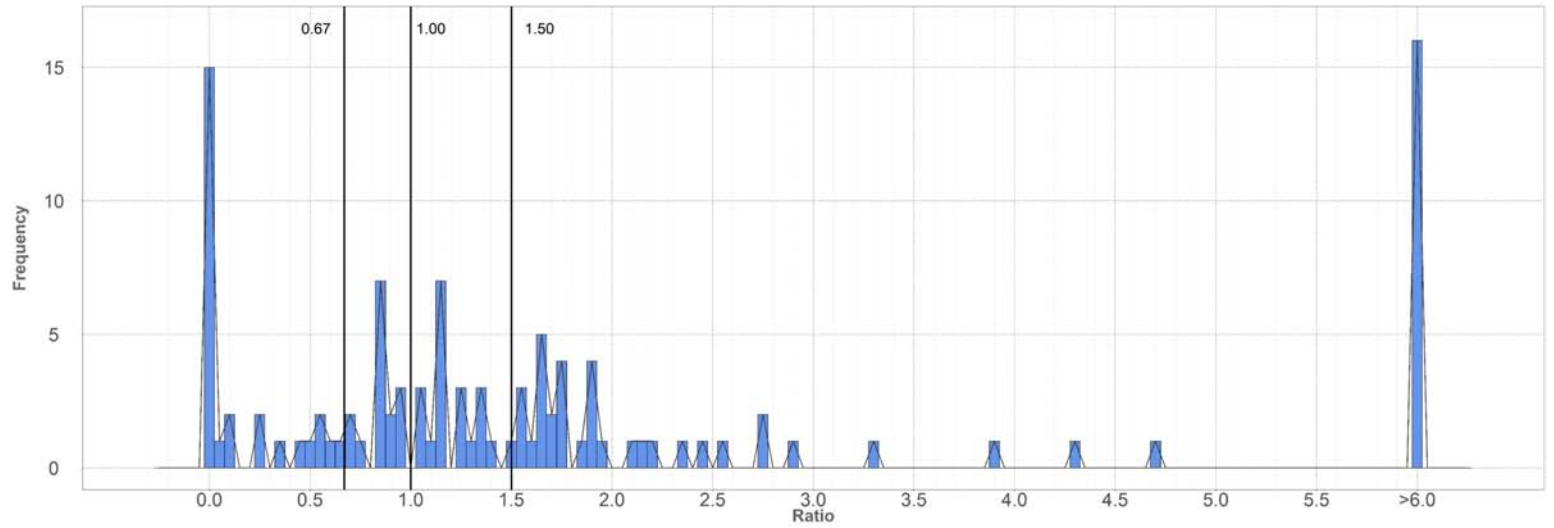

*trans*

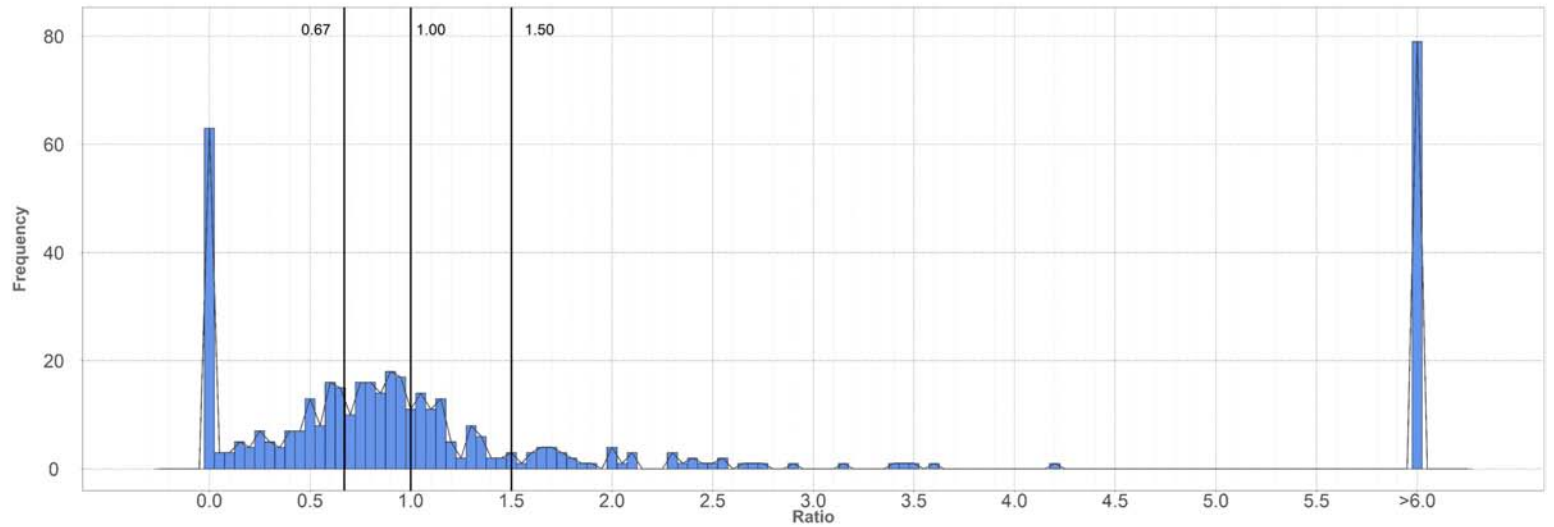



# Genes with mCHH in both trisomy 5 and diploid

*cis*

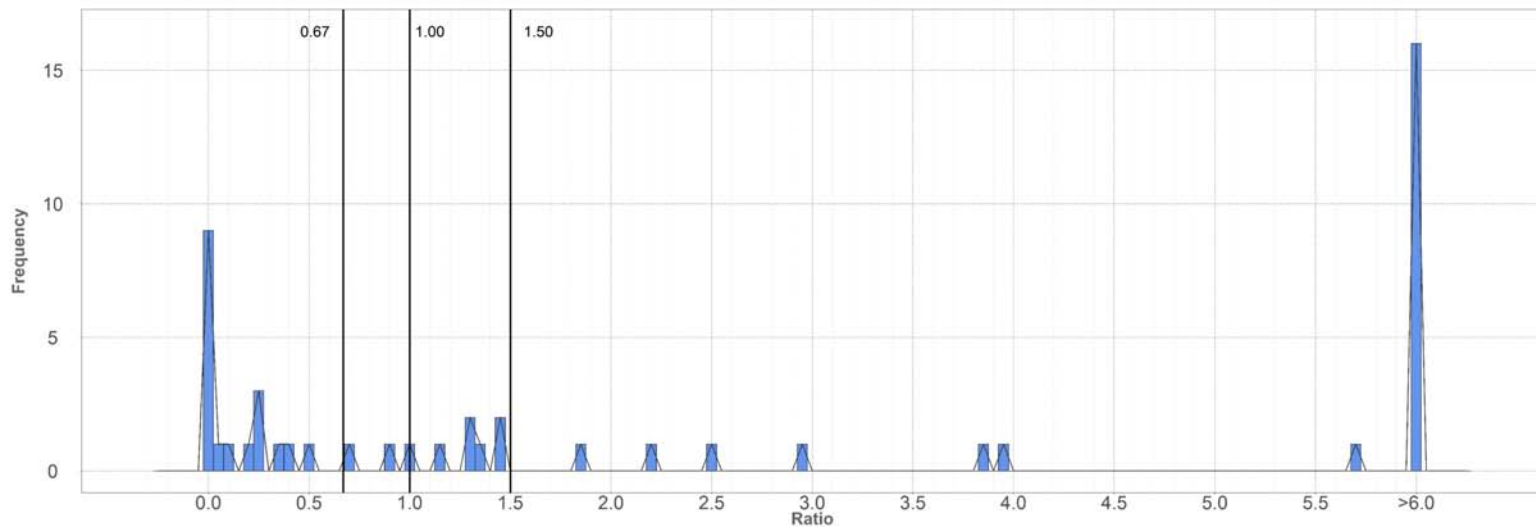

*trans*

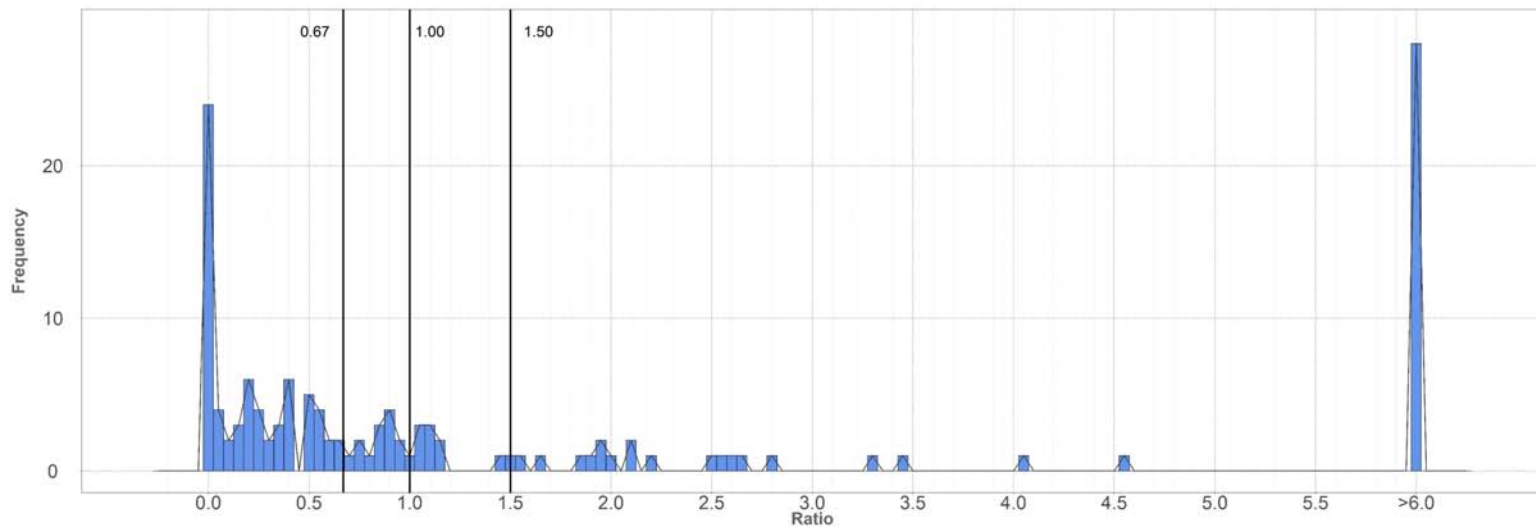

# Genes UM in both trisomy 1 and diploid

*cis*

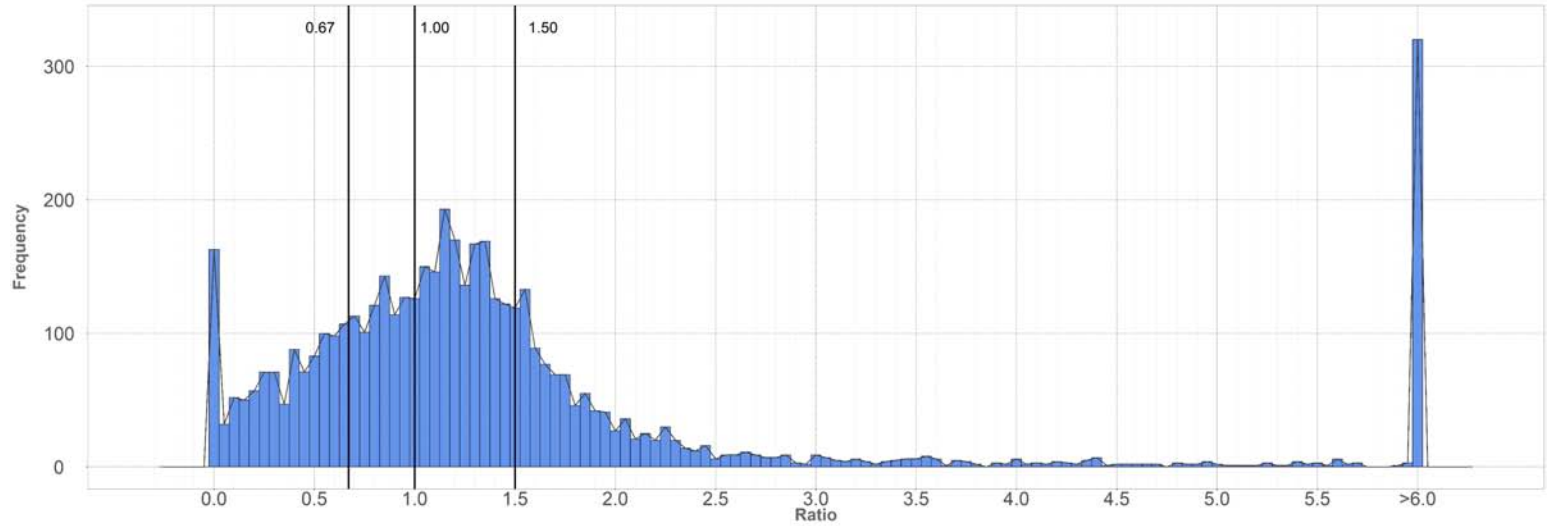

*trans*

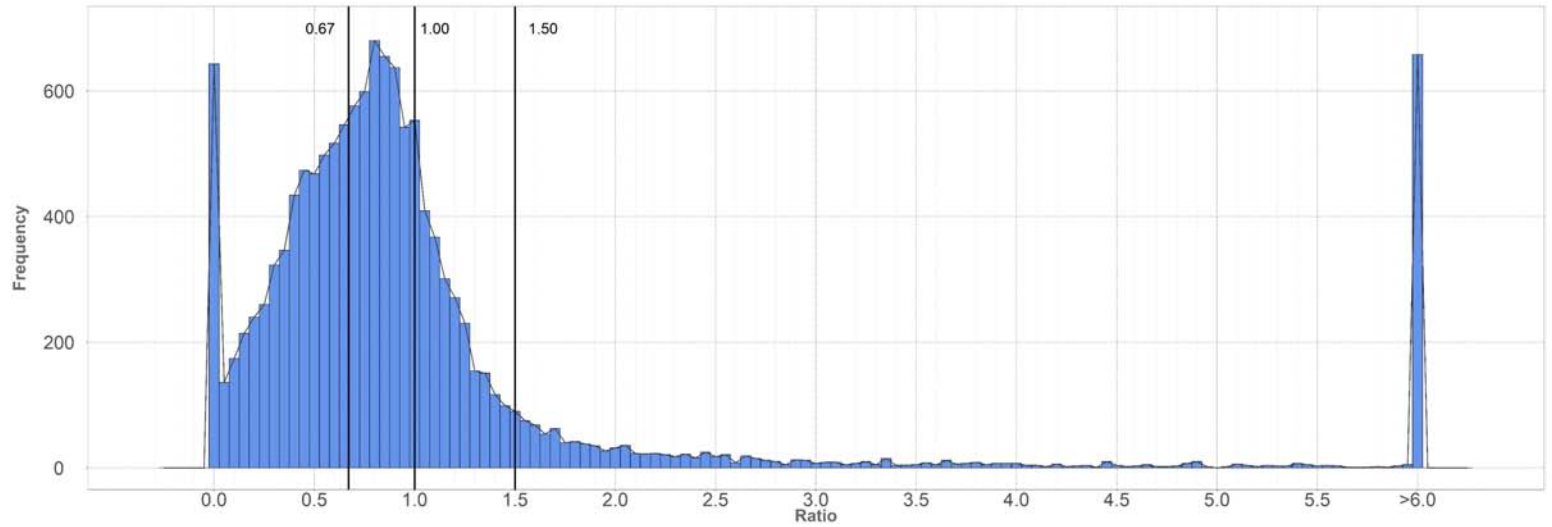

# Genes UM in both trisomy 2 and diploid

*cis*

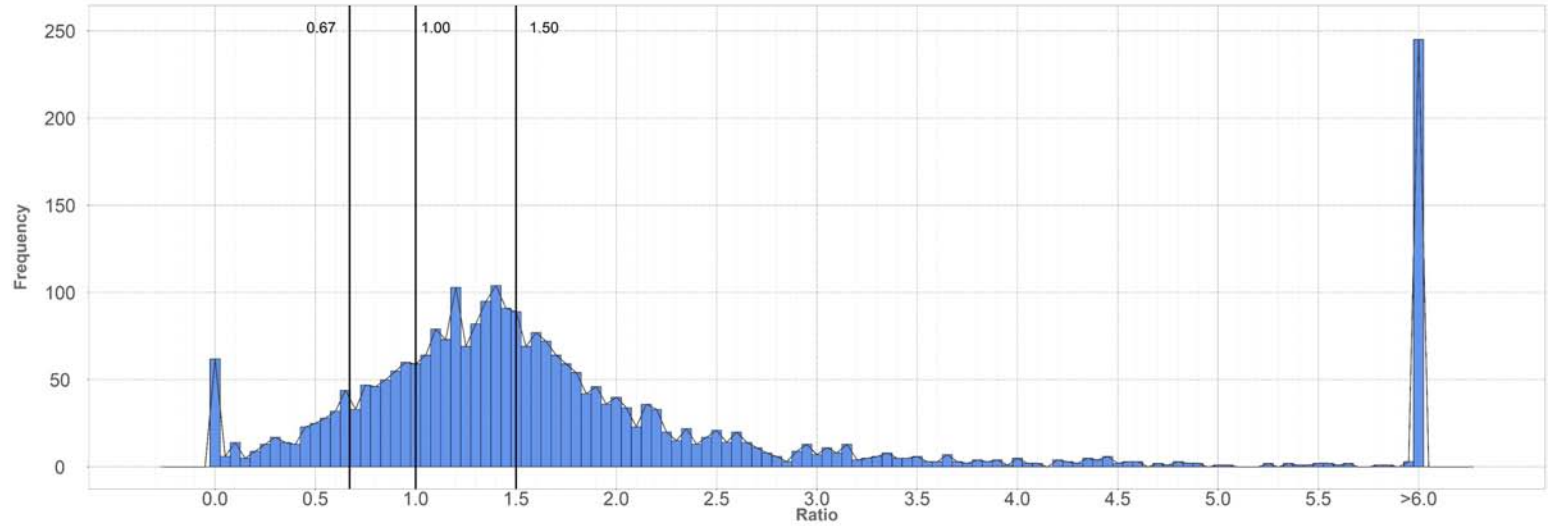

*trans*

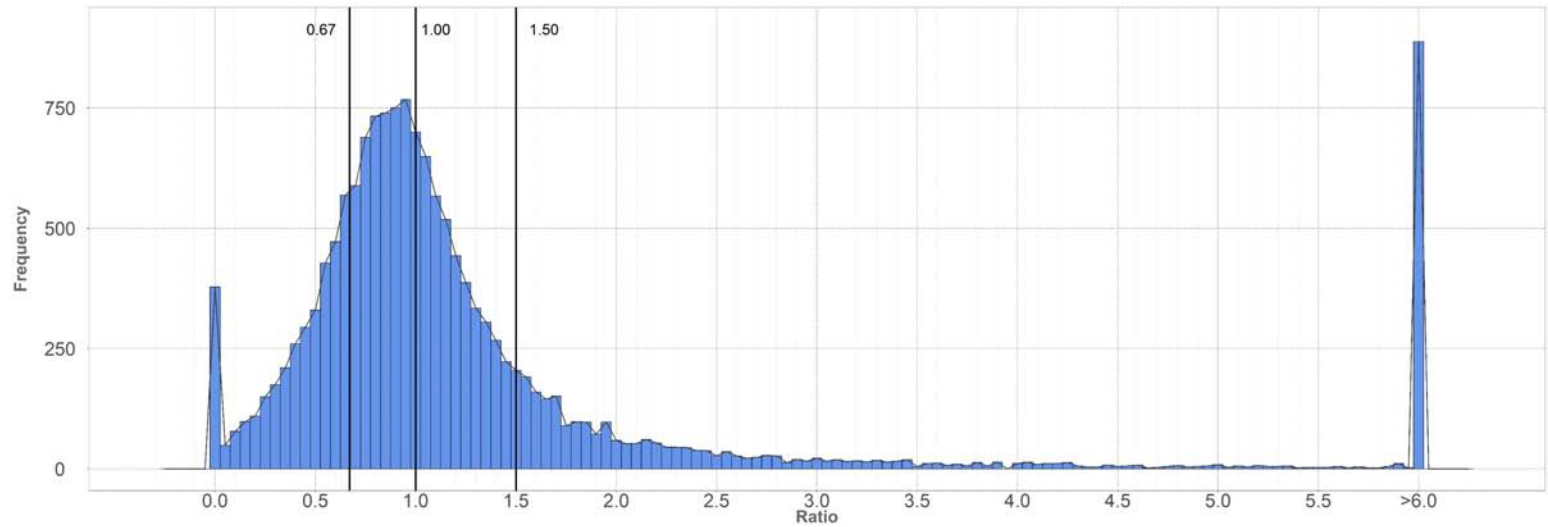

# Genes UM in both trisomy 3 and diploid

*cis*

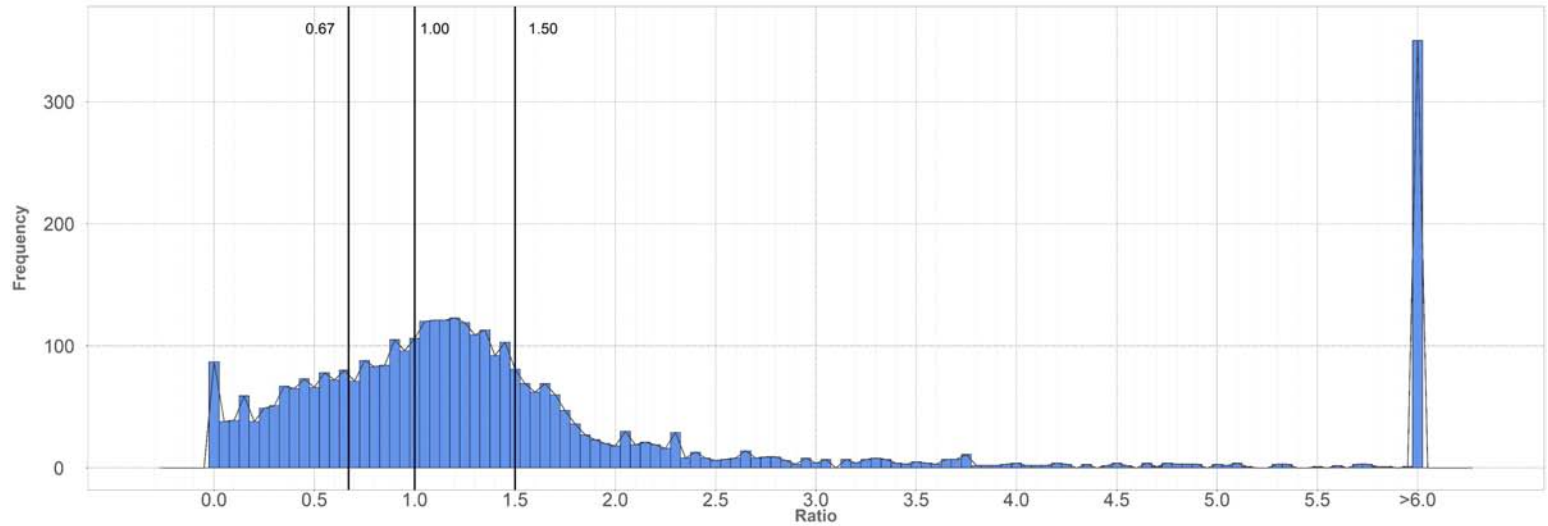

*trans*

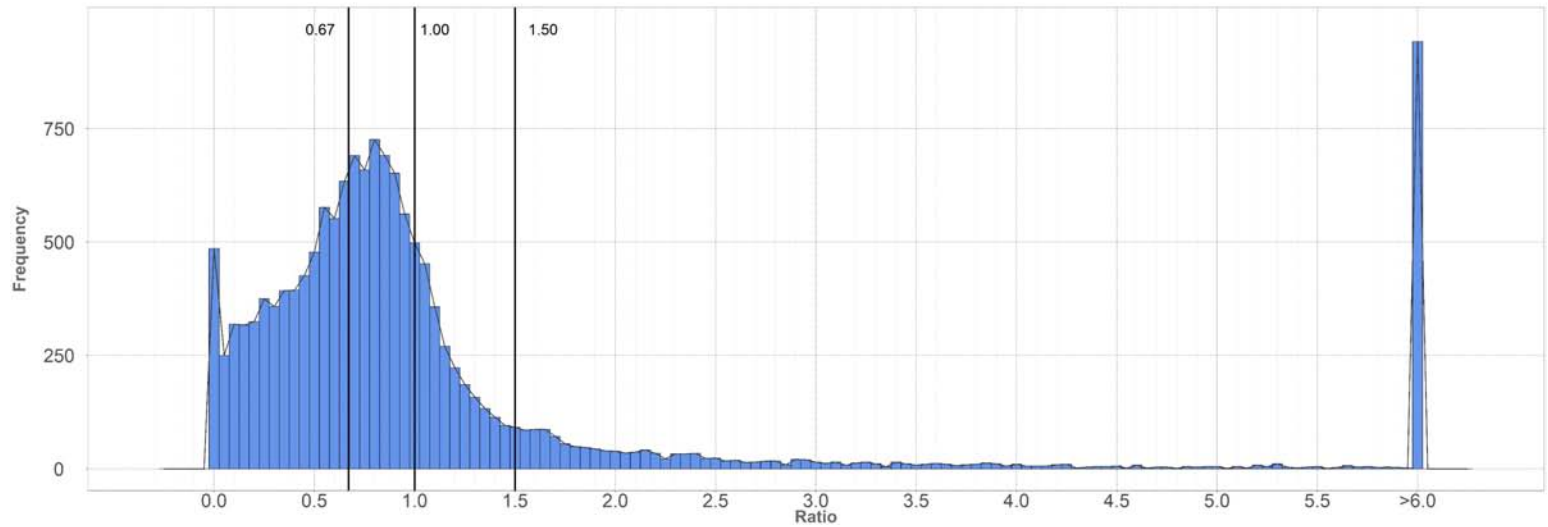

# Genes UM in both trisomy 4 and diploid

*cis*

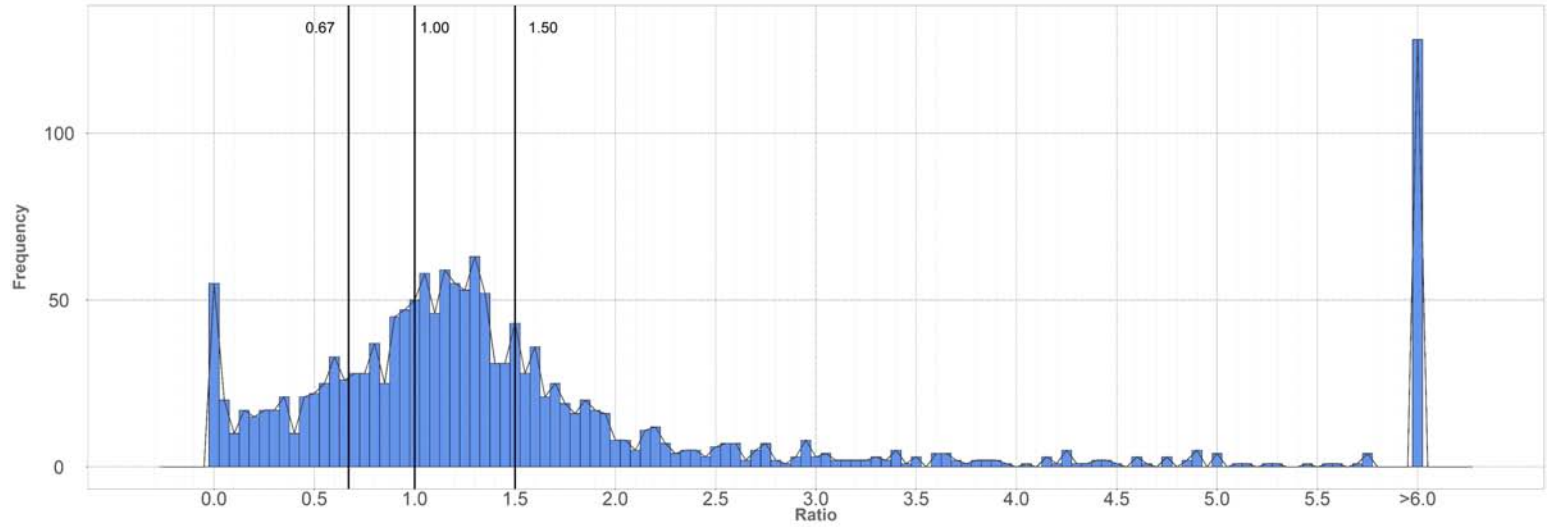

*trans*

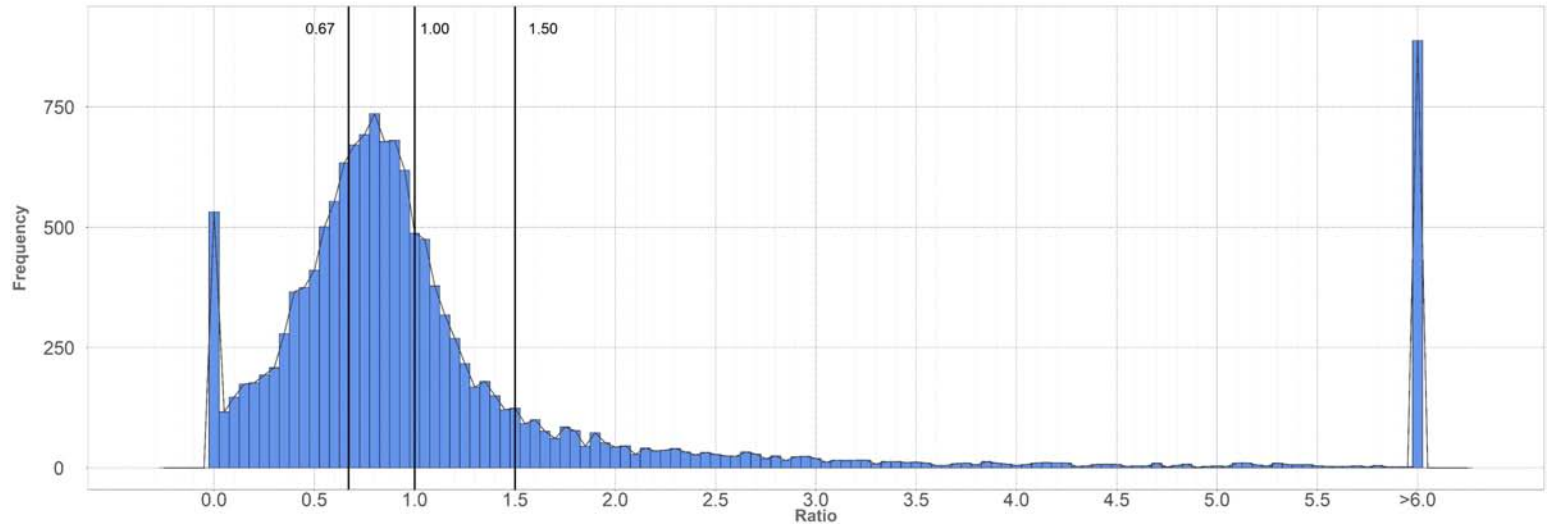

# Genes UM in both trisomy 5 and diploid

*cis*

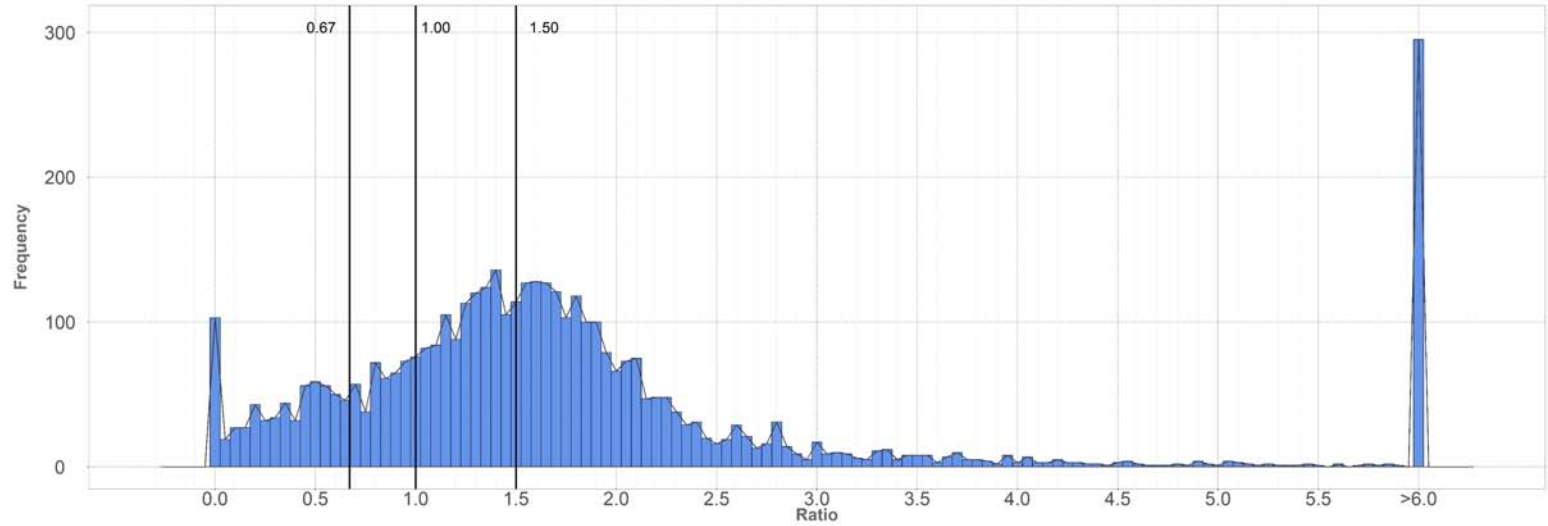

*trans*

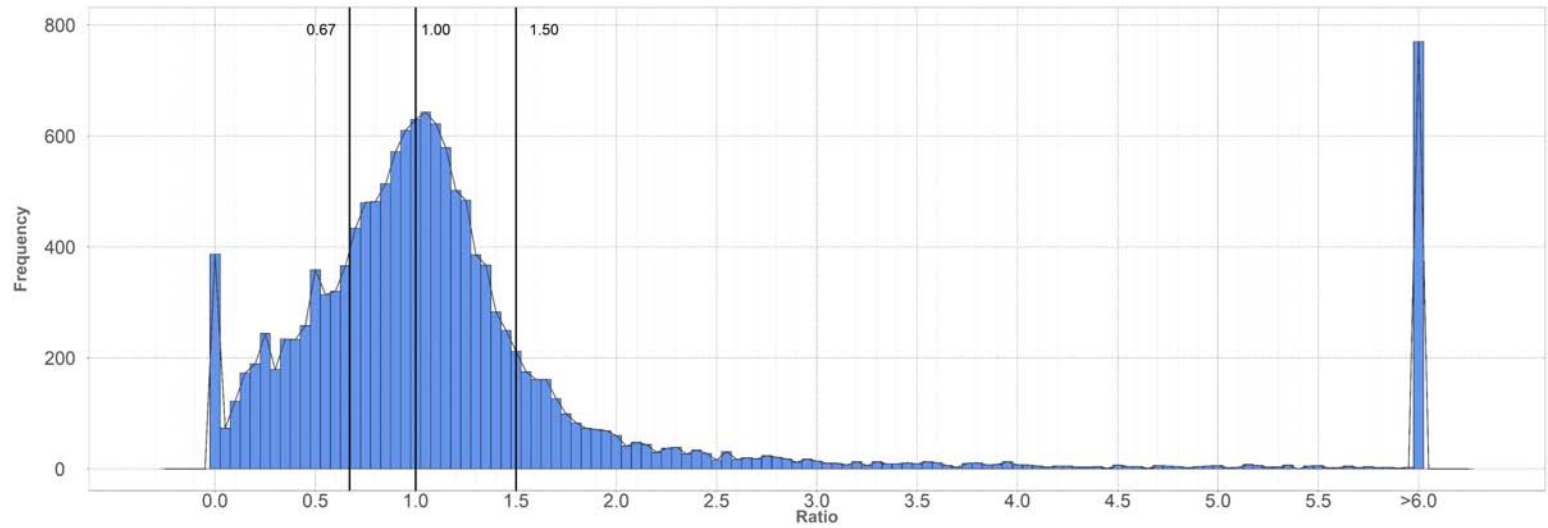

# Genes with gbM in both trisomy 1 and diploid

*cis*

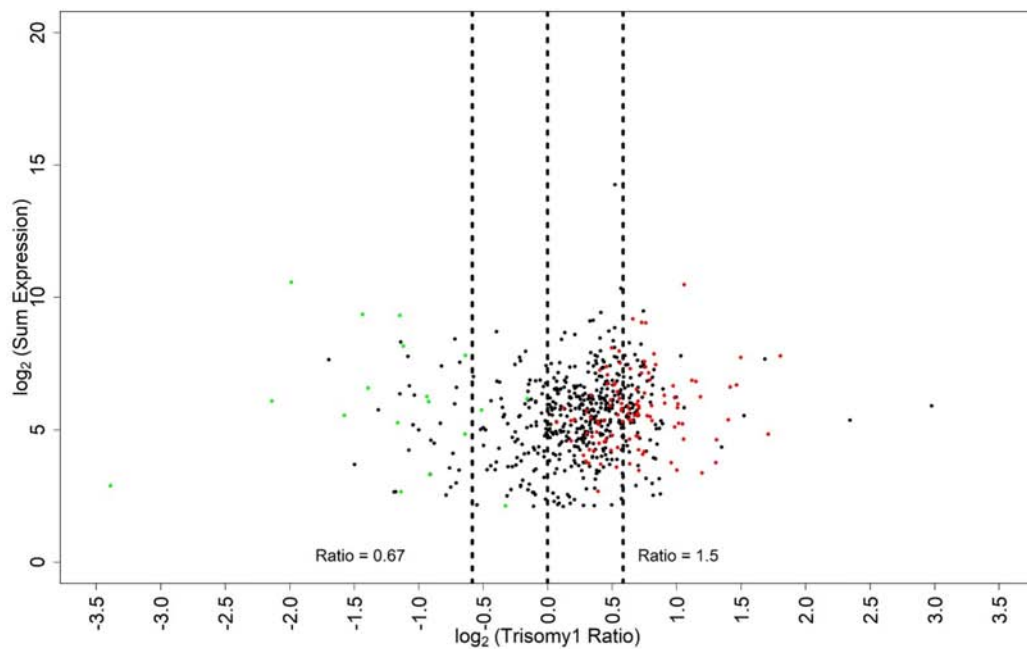

*trans*

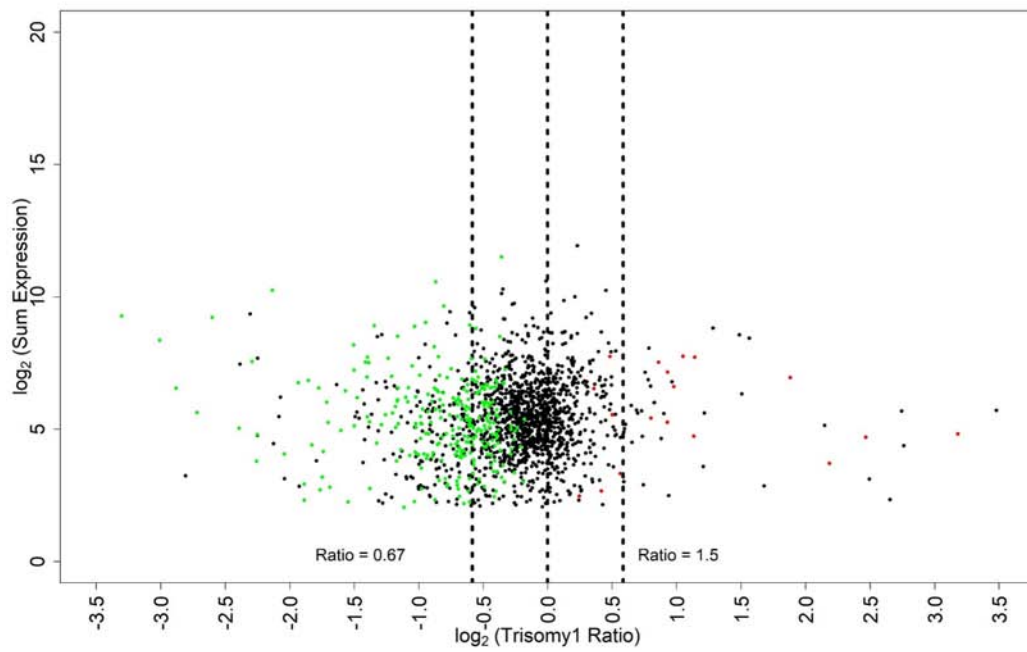

# Genes with gbM in both trisomy 2 and diploid

*cis*

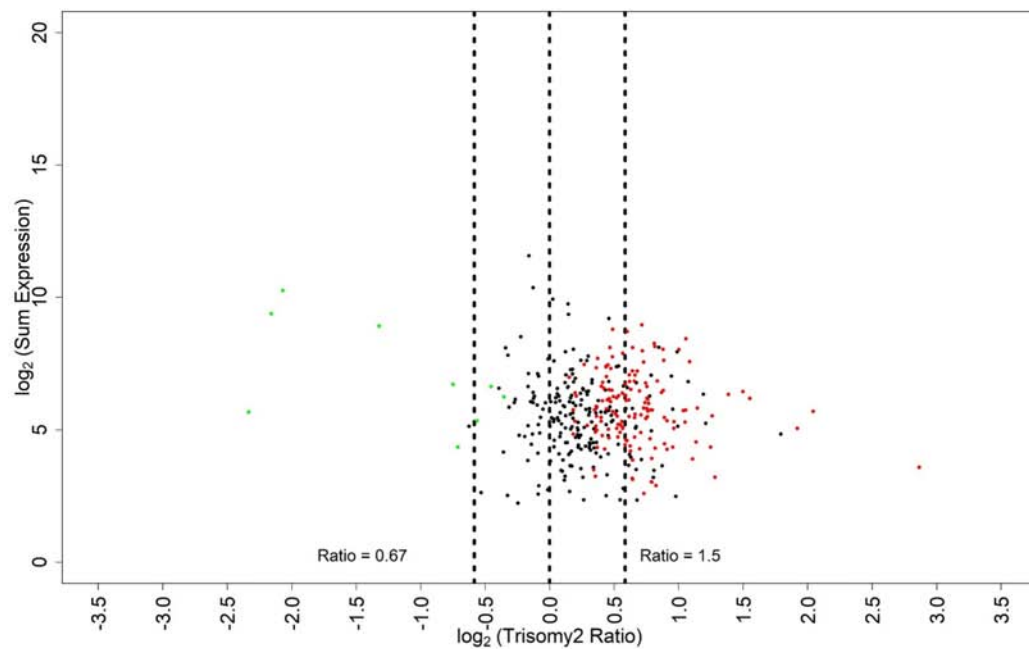

*trans*

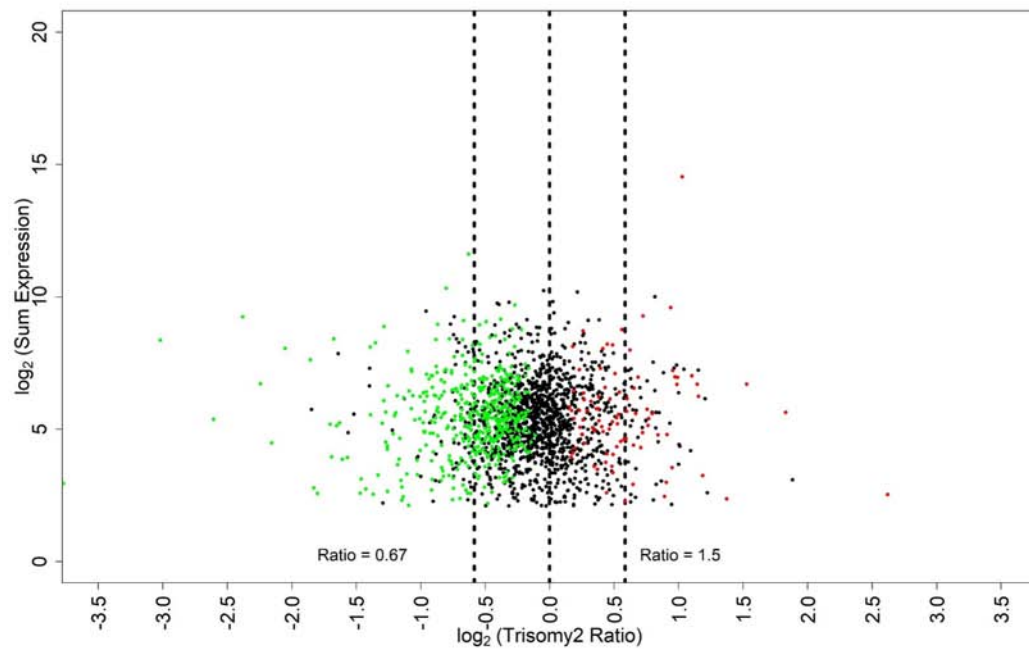



# Genes with gbM in both trisomy 3 and diploid

*cis*

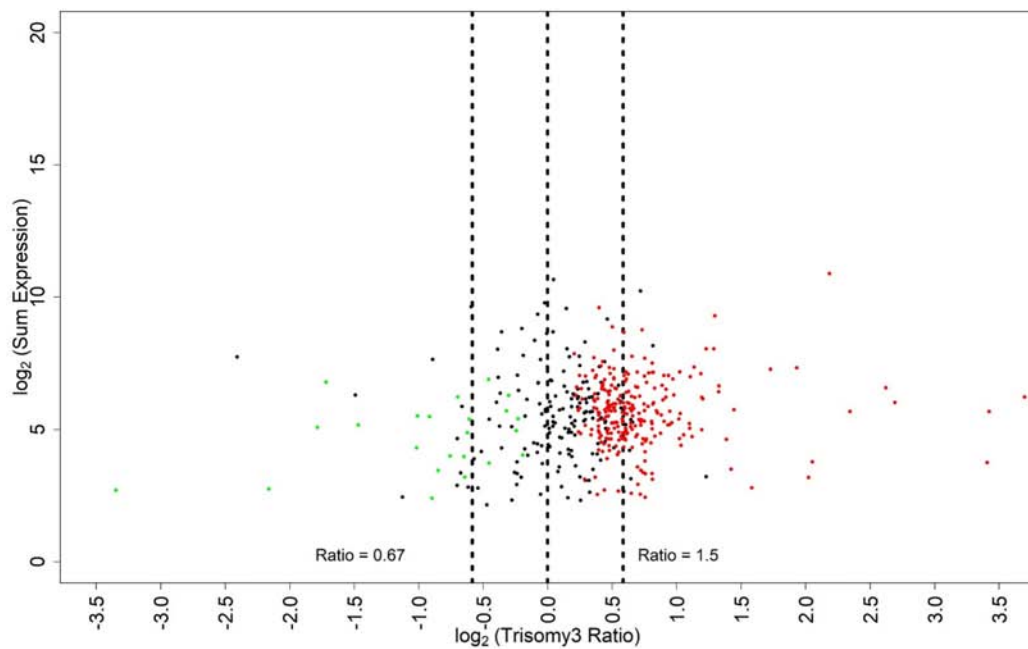

*trans*

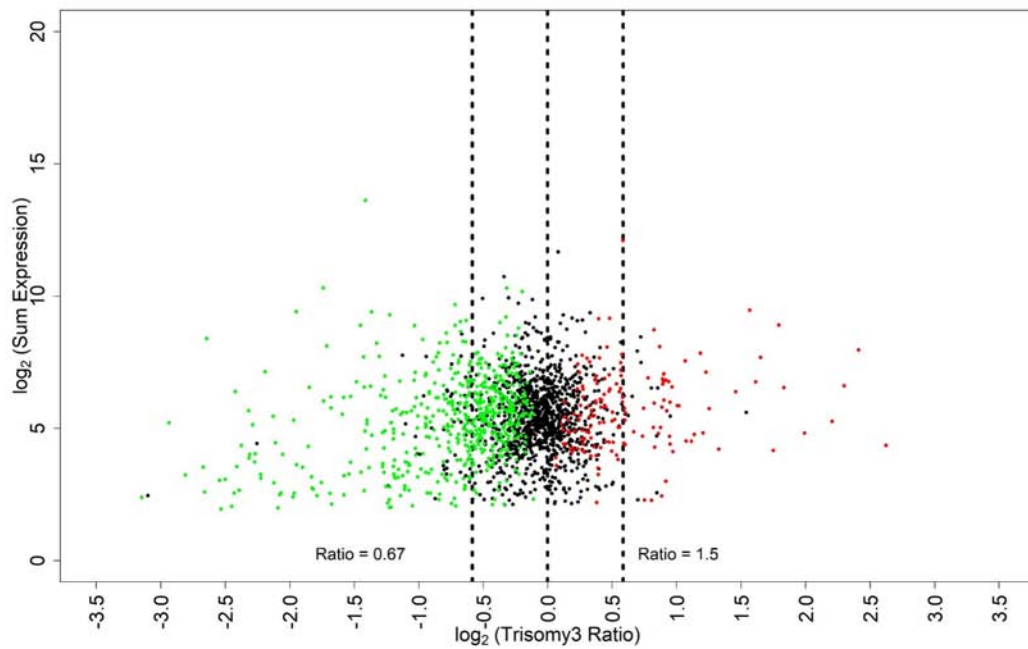

# Genes with gbM in both trisomy 4 and diploid

*cis*

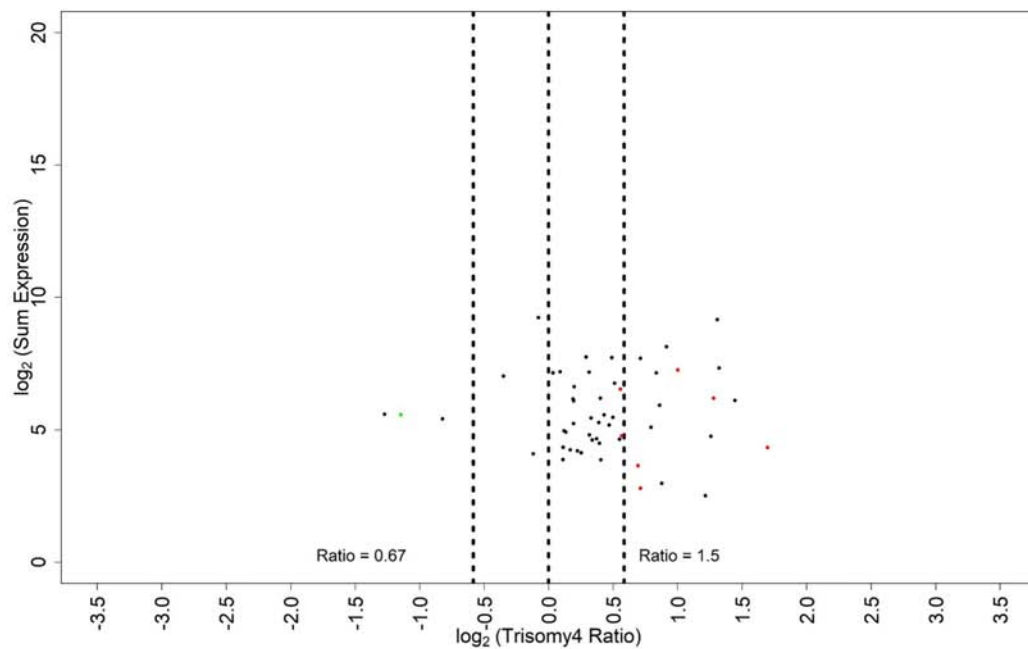

*trans*

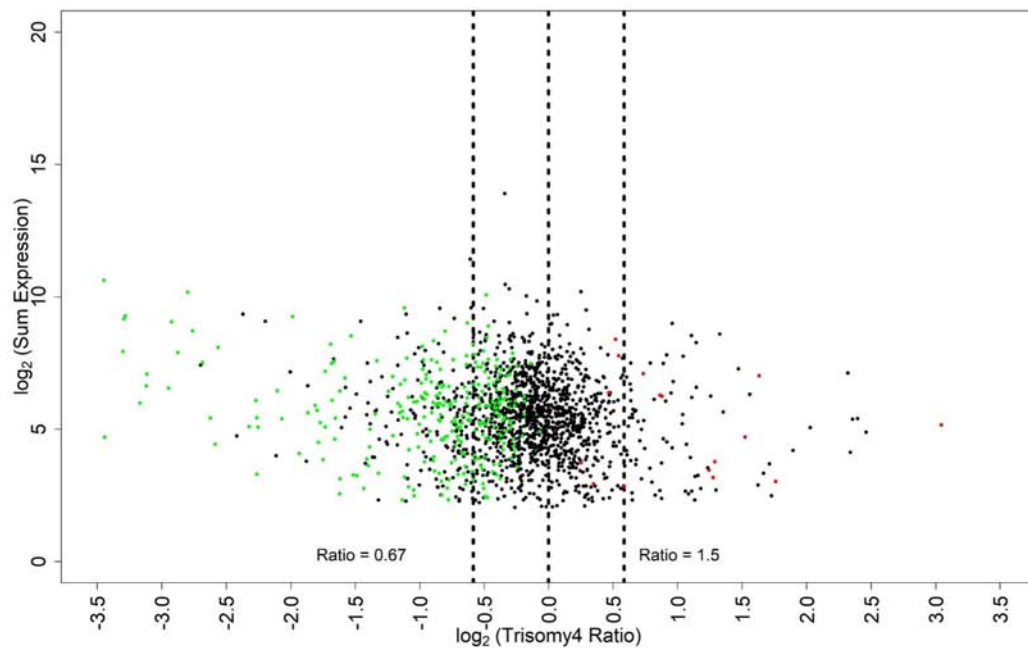

# Genes with gbM in both trisomy 5 and diploid

*cis*

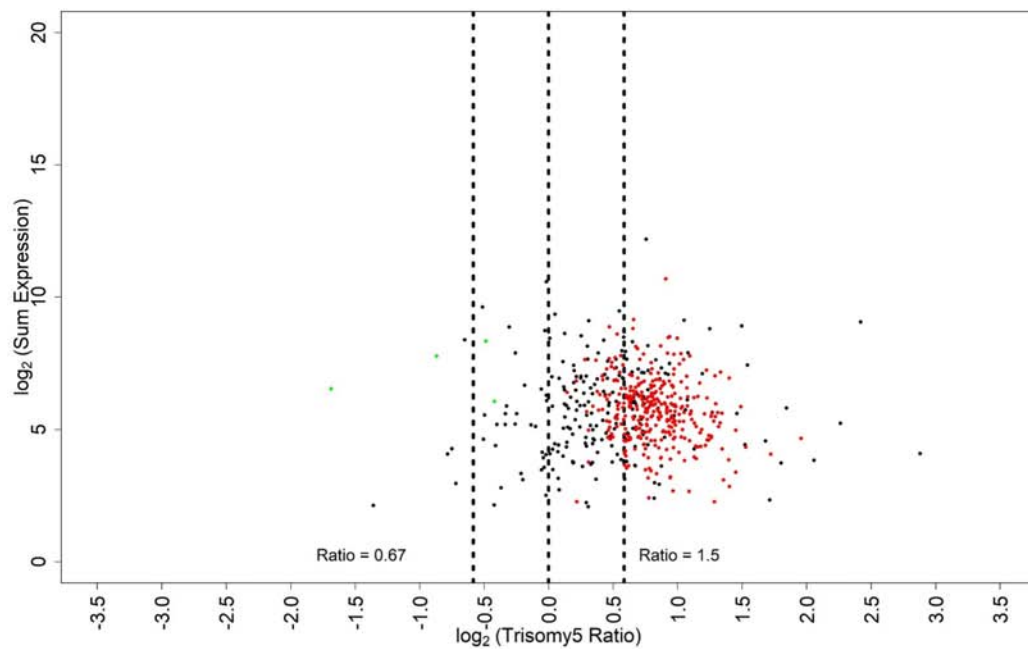

*trans*

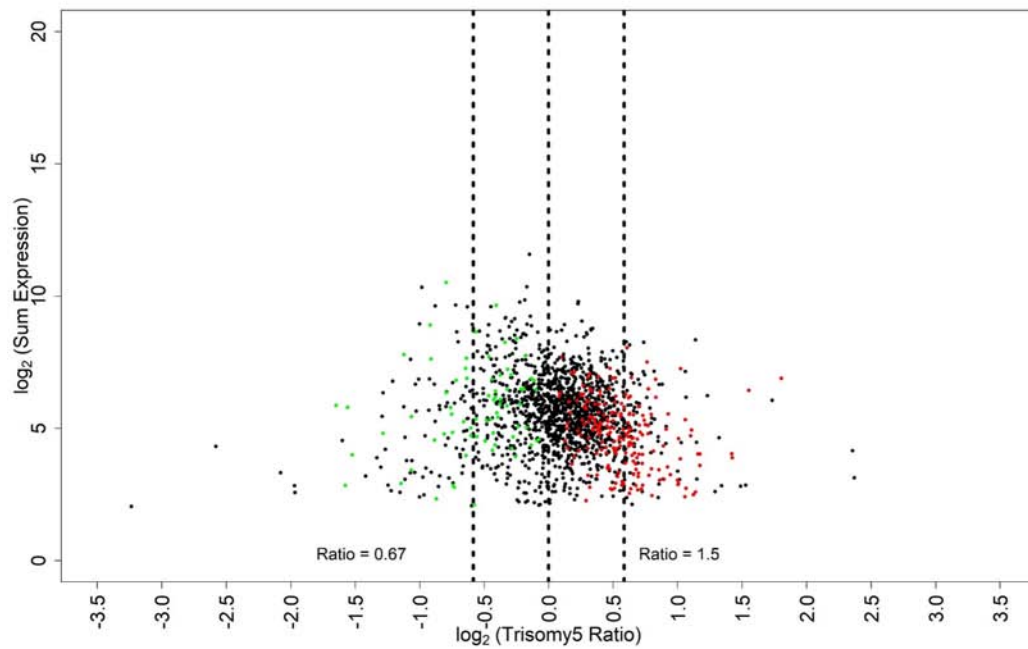

# Genes with gbM in both triploid and diploid

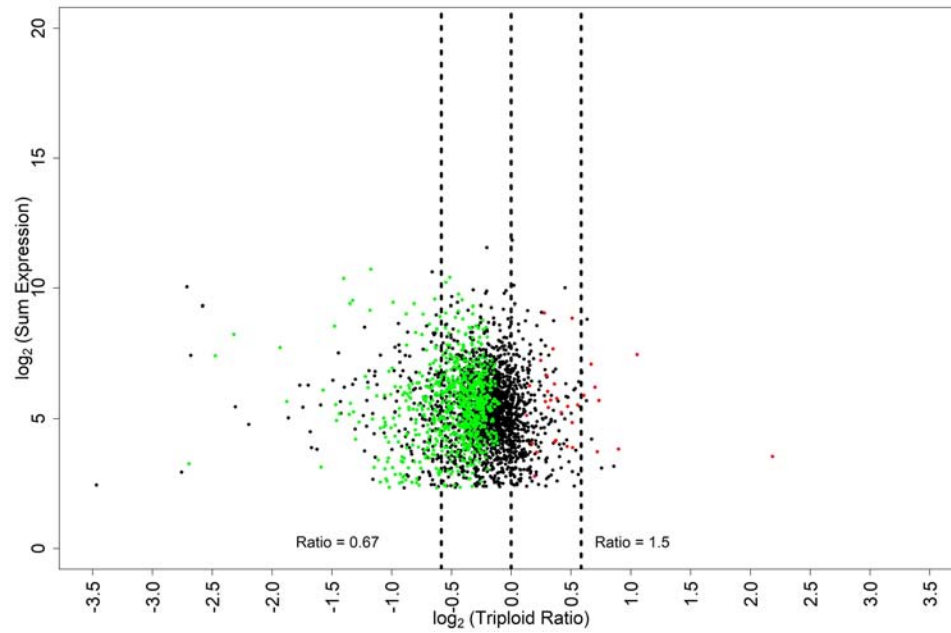

# Genes with gbM in both tetraploid and diploid

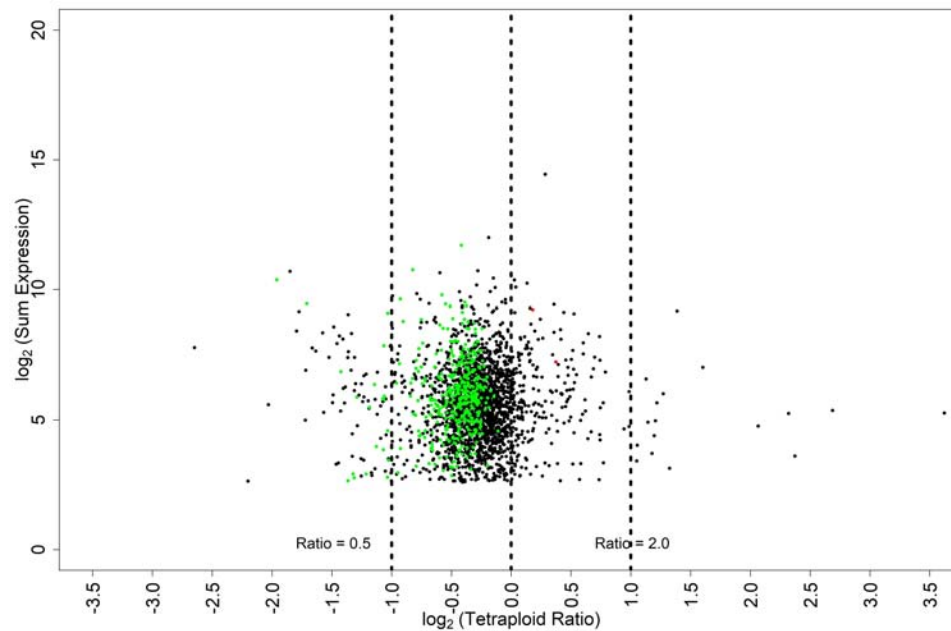

# Genes with mCHH in both trisomy 1 and diploid

*cis*

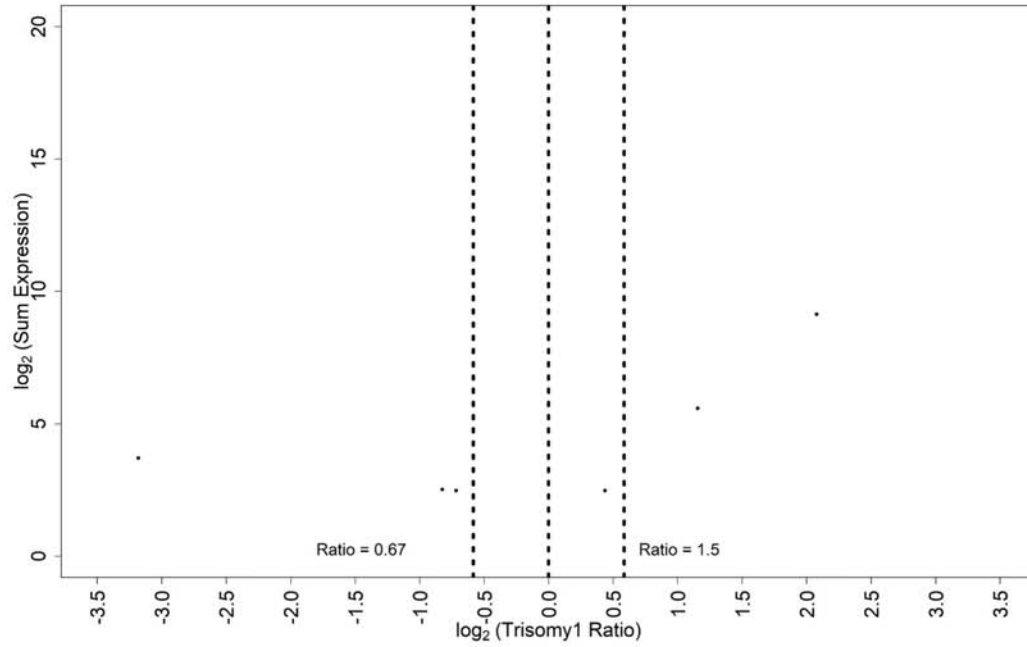

*trans*

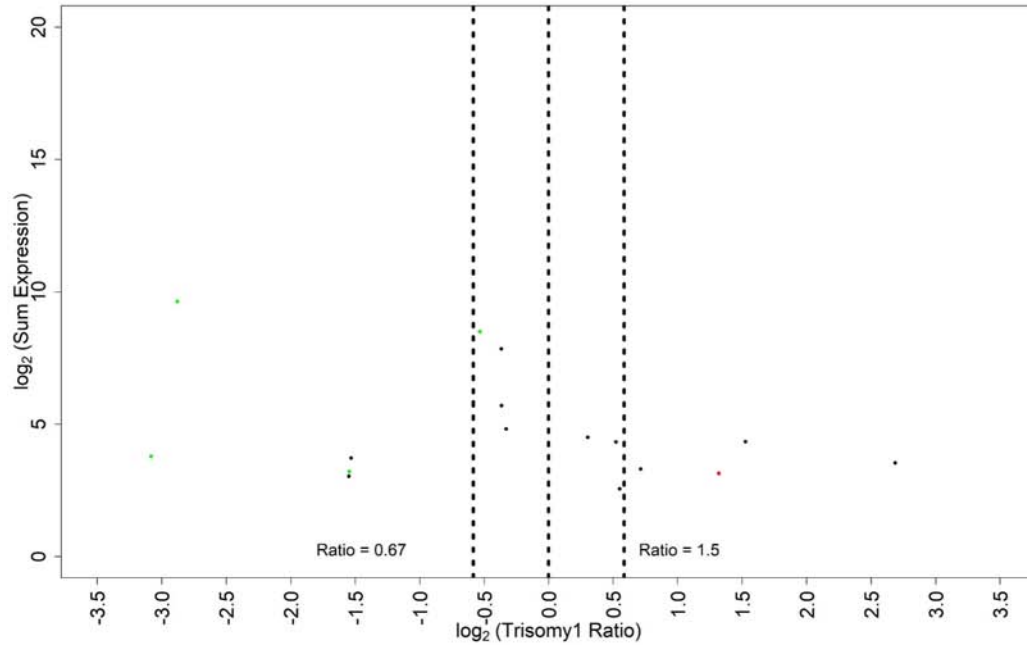

# Genes with mCHH in both trisomy 2 and diploid

*cis*

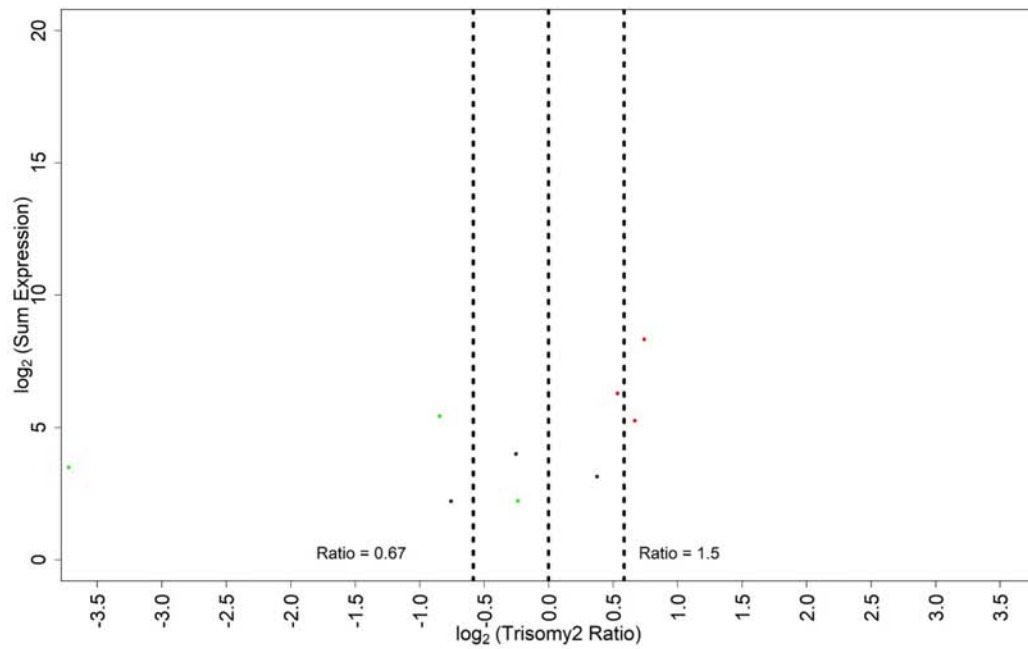

*trans*

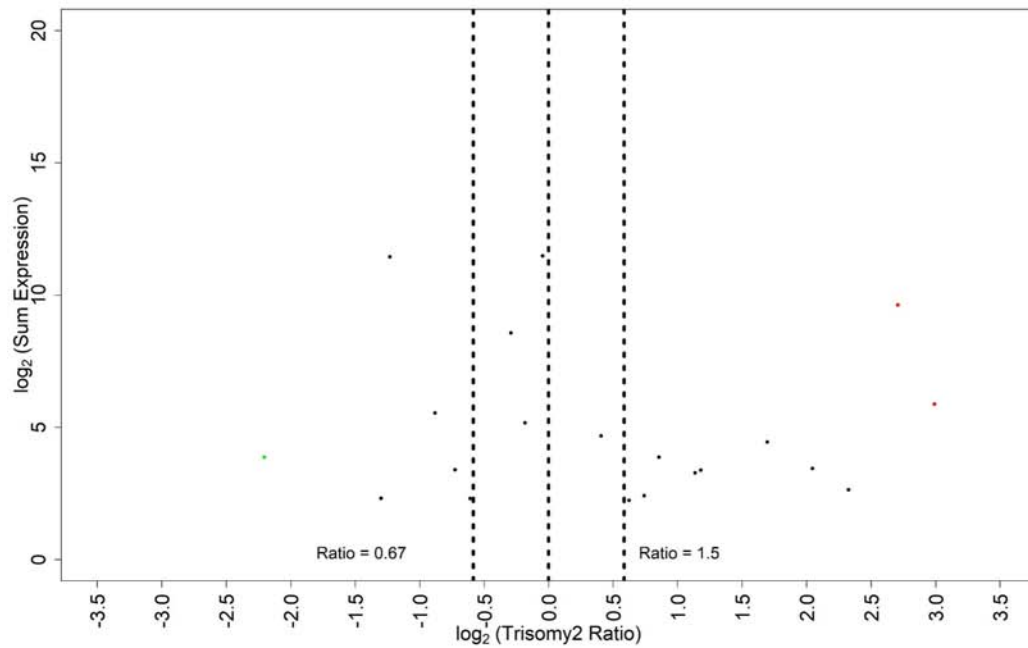

# Genes with mCHH in both trisomy 3 and diploid

*cis*

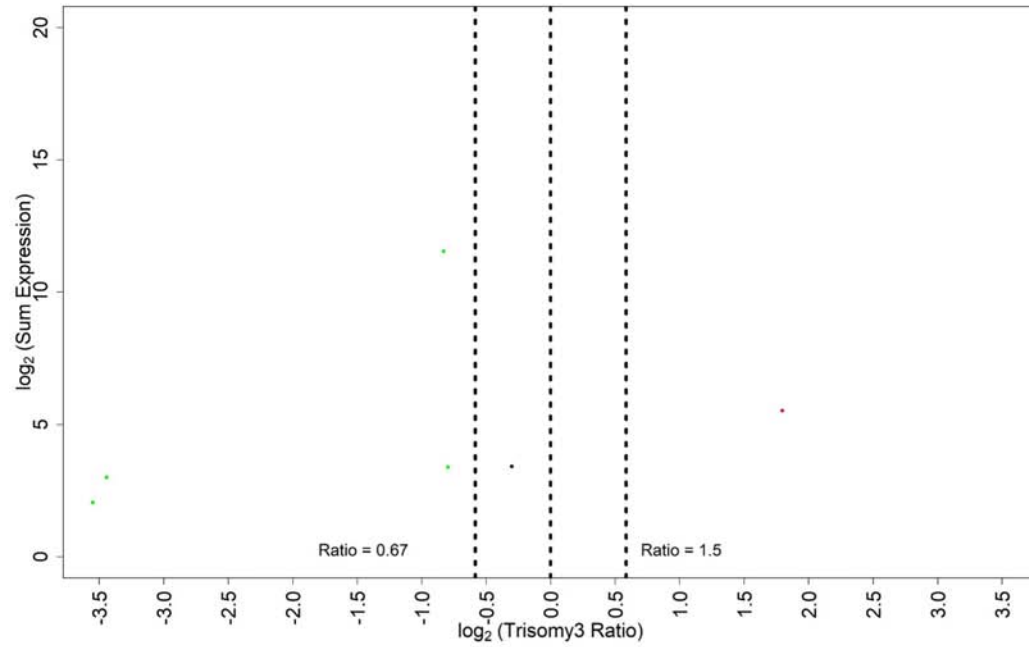

*trans*

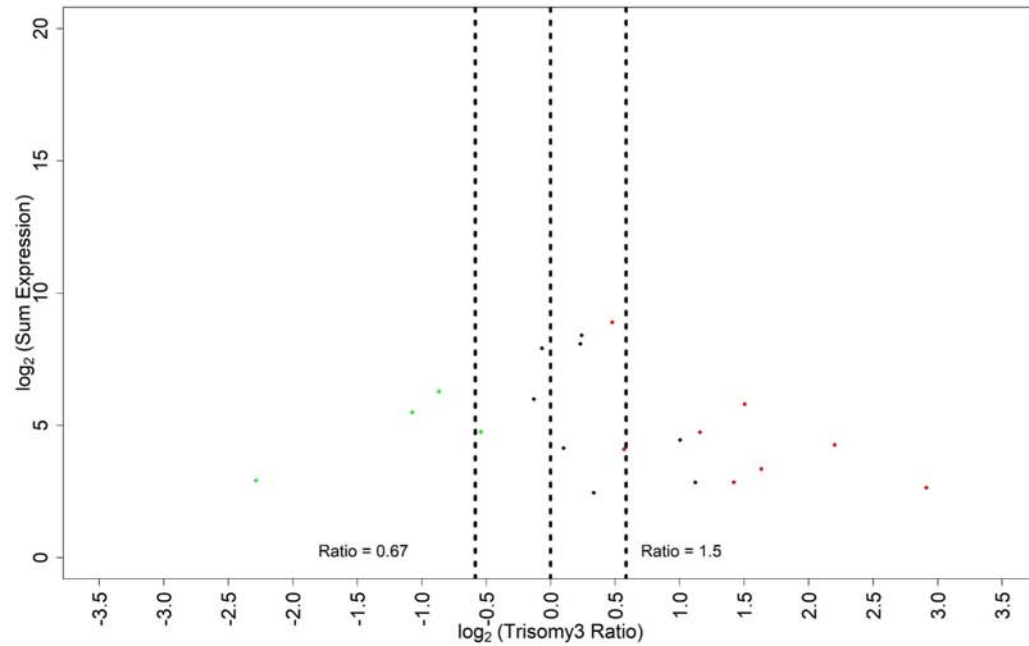

# Genes with mCHH in both trisomy 4 and diploid

*cis*

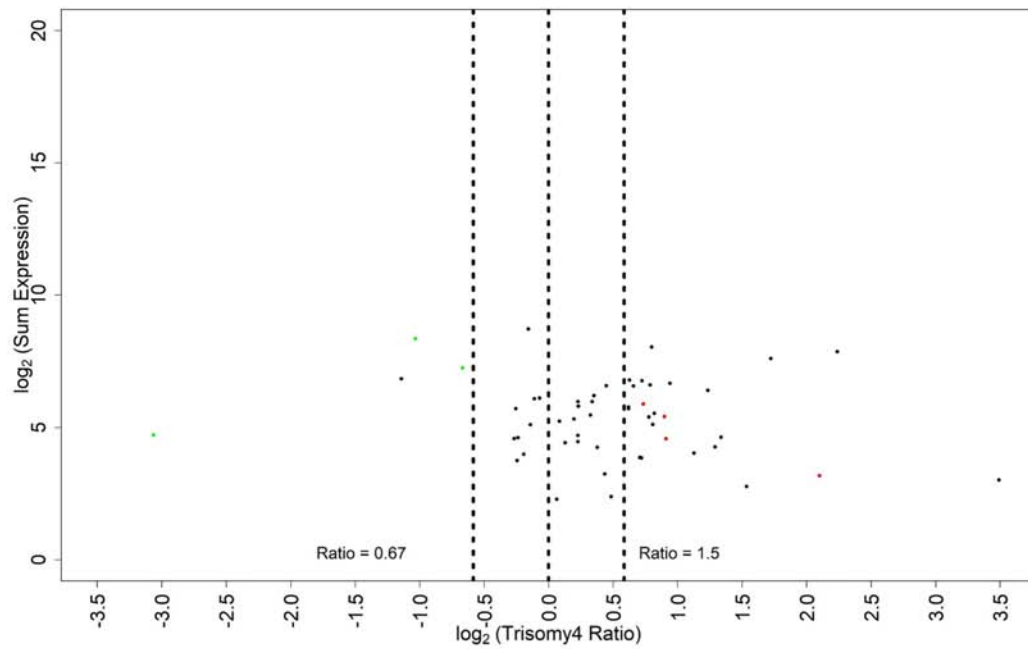

*trans*

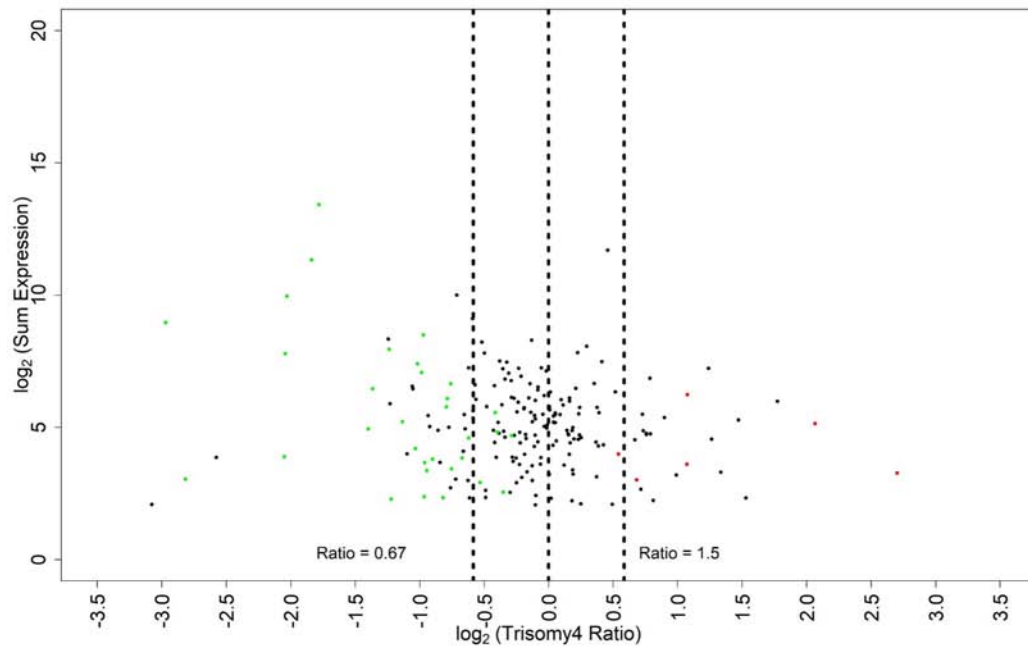



# Genes with mCHH in both trisomy 5 and diploid

*cis*

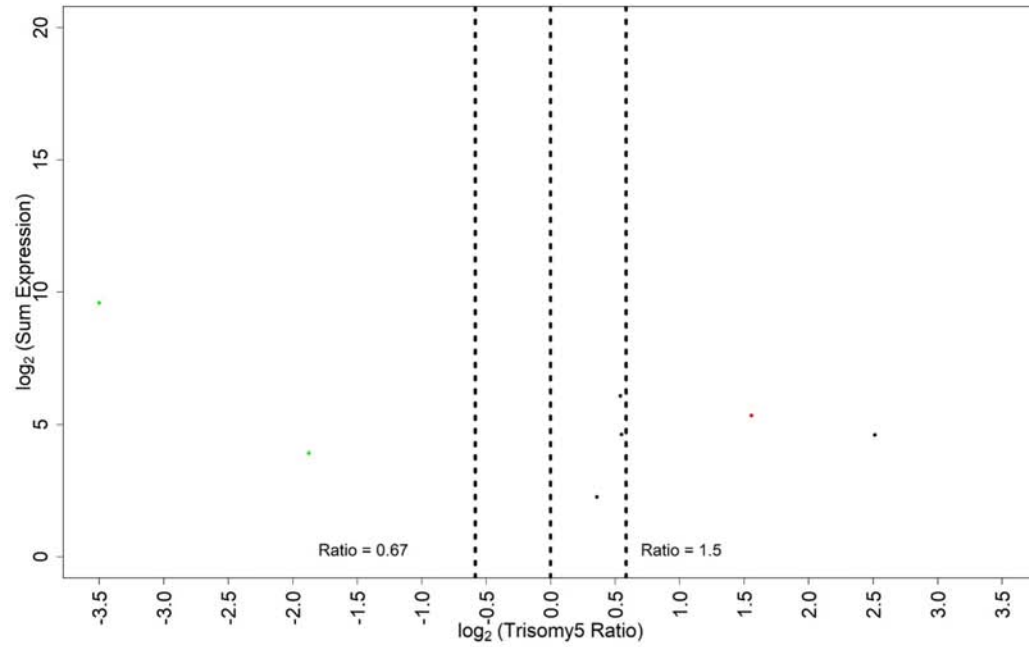

*trans*

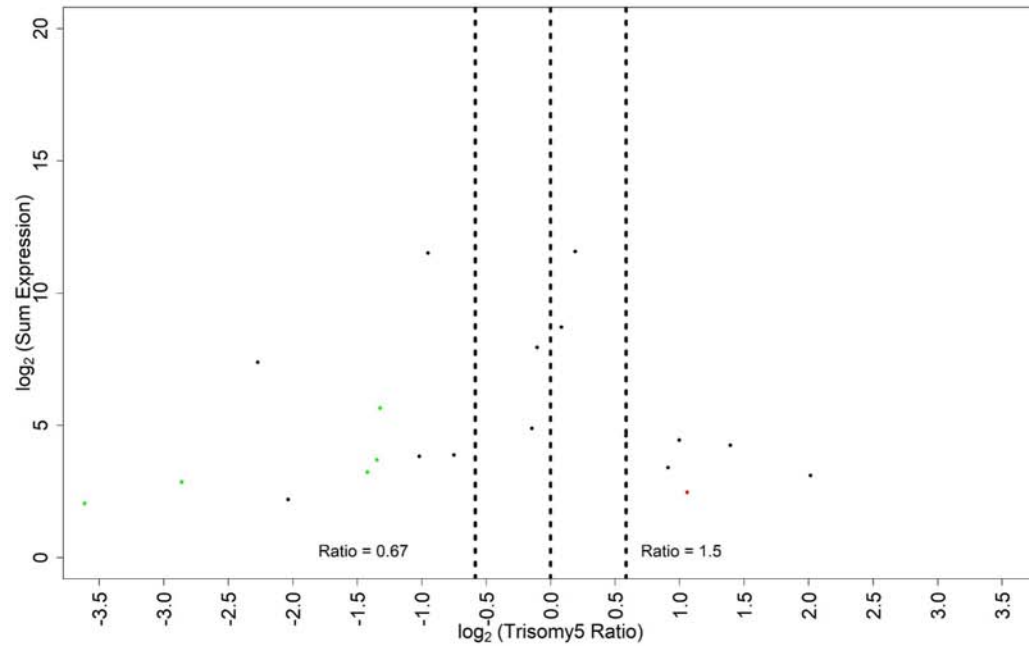

# Genes with mCHH in both triploid and diploid

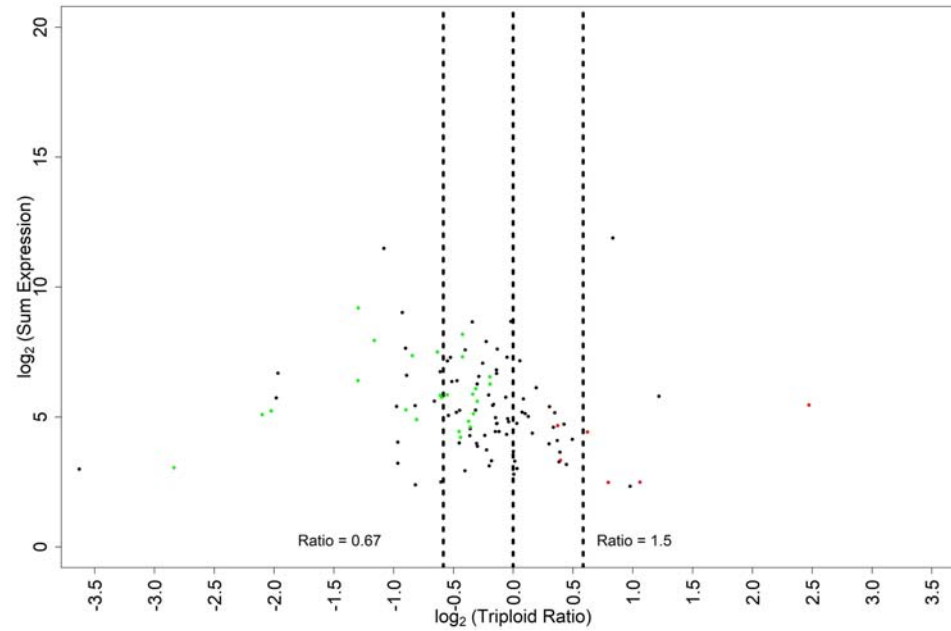

# Genes with mCHH in both tetraploid and diploid

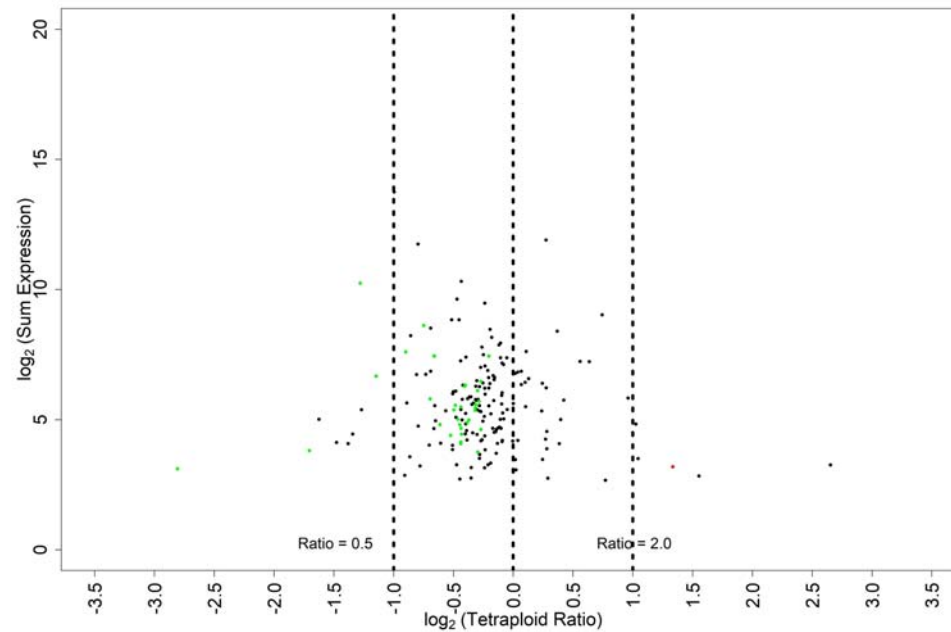

# Genes UM in both trisomy 1 and diploid

*cis*

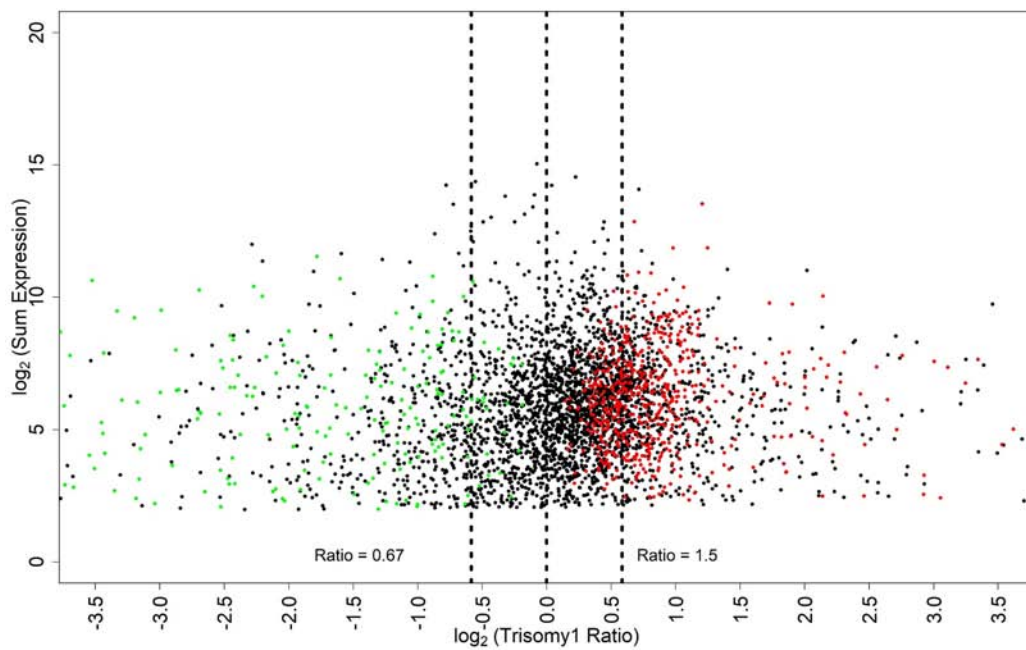

*trans*

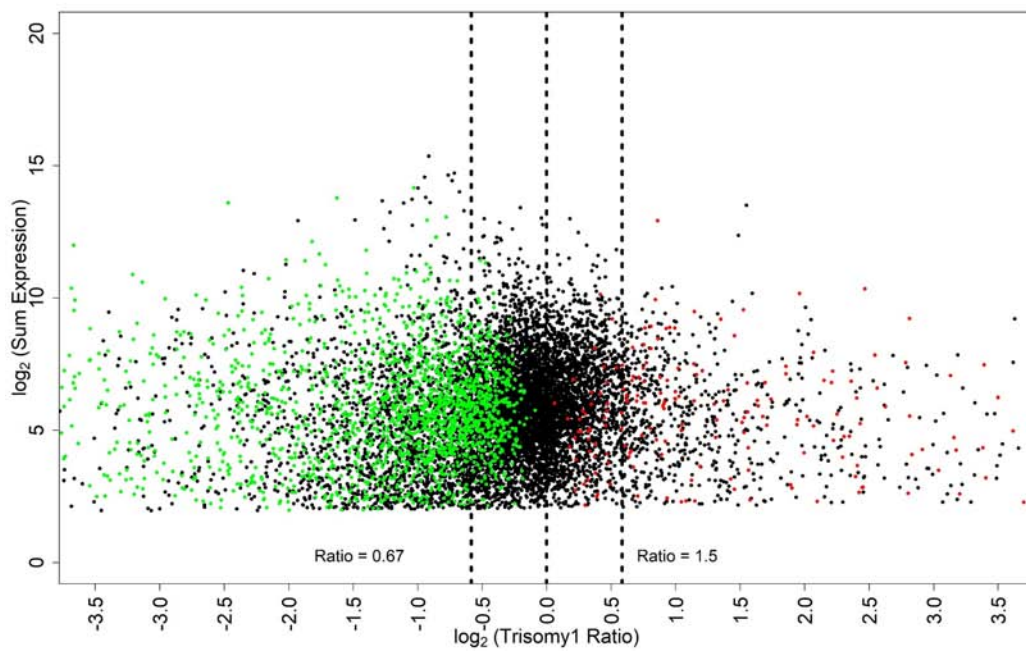

# Genes UM in both trisomy 2 and diploid

*cis*

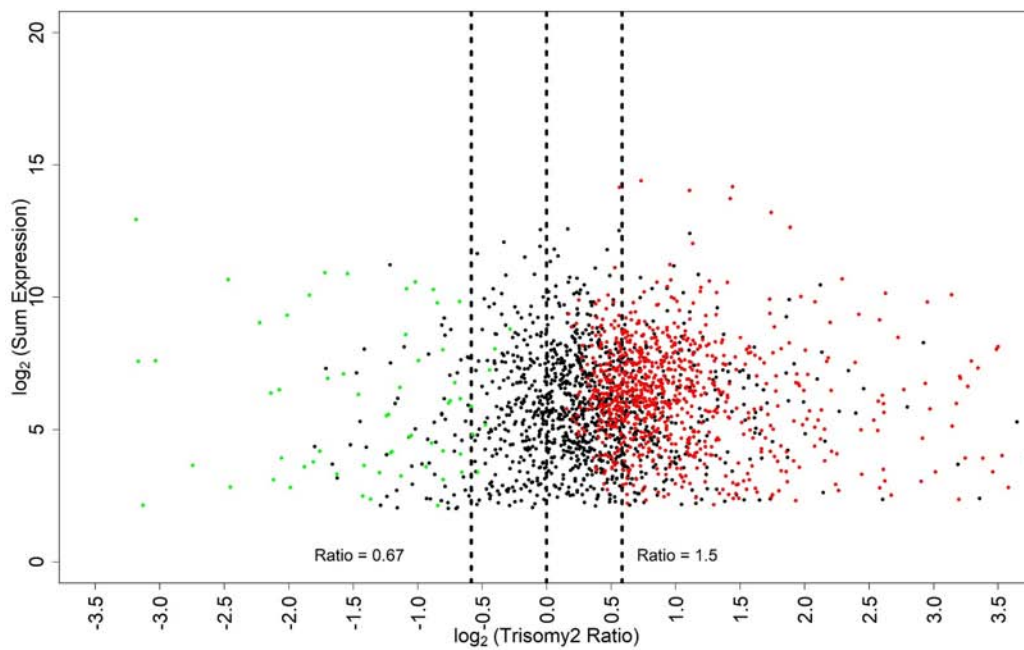

*trans*

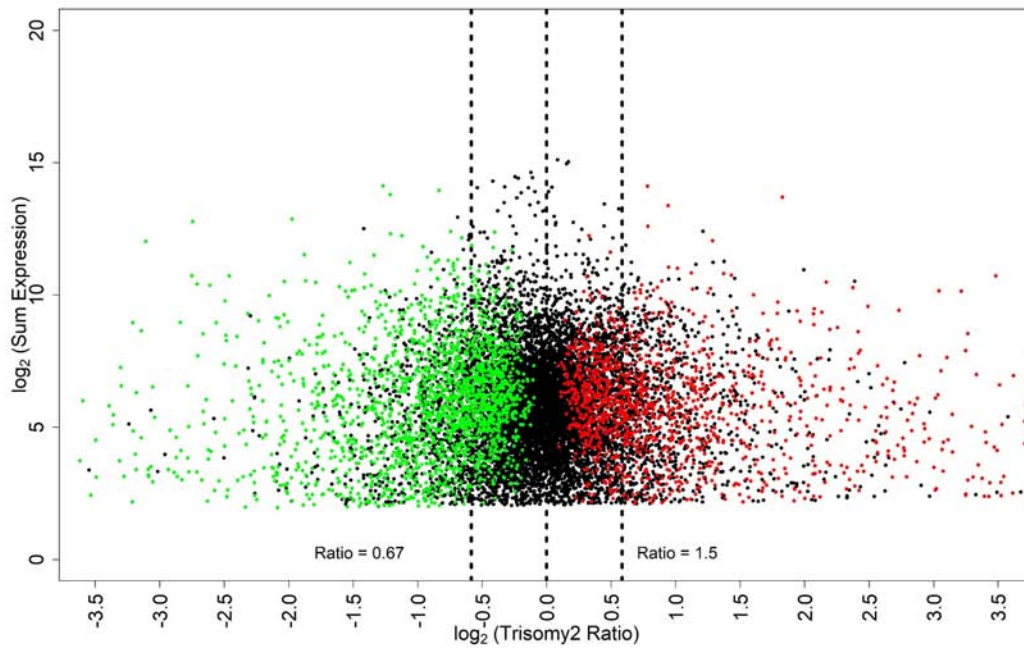

# Genes UM in both trisomy 3 and diploid

*cis*

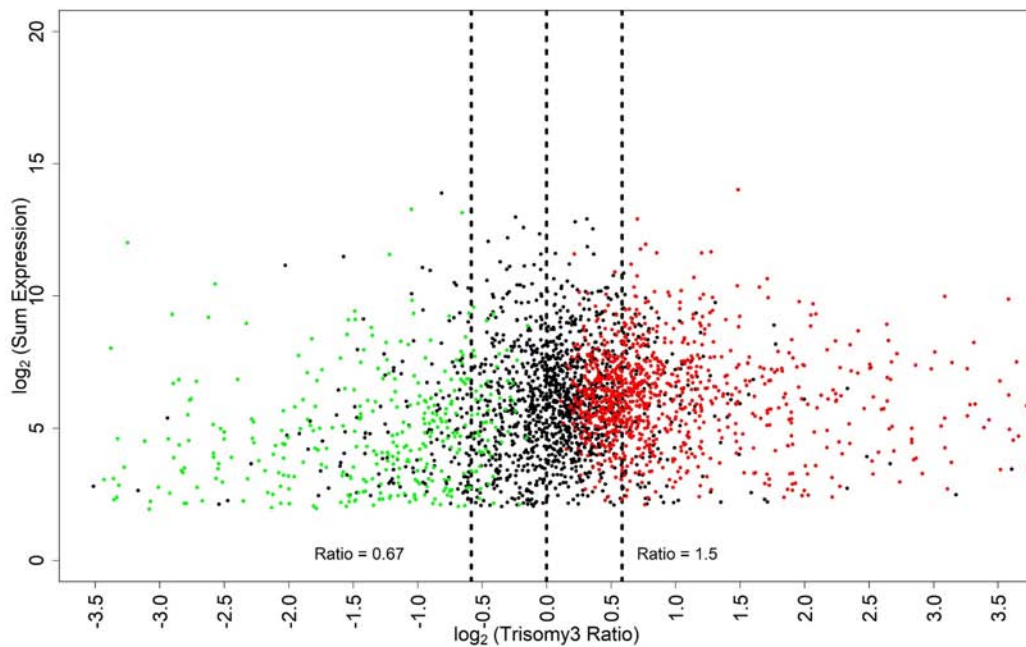

*trans*

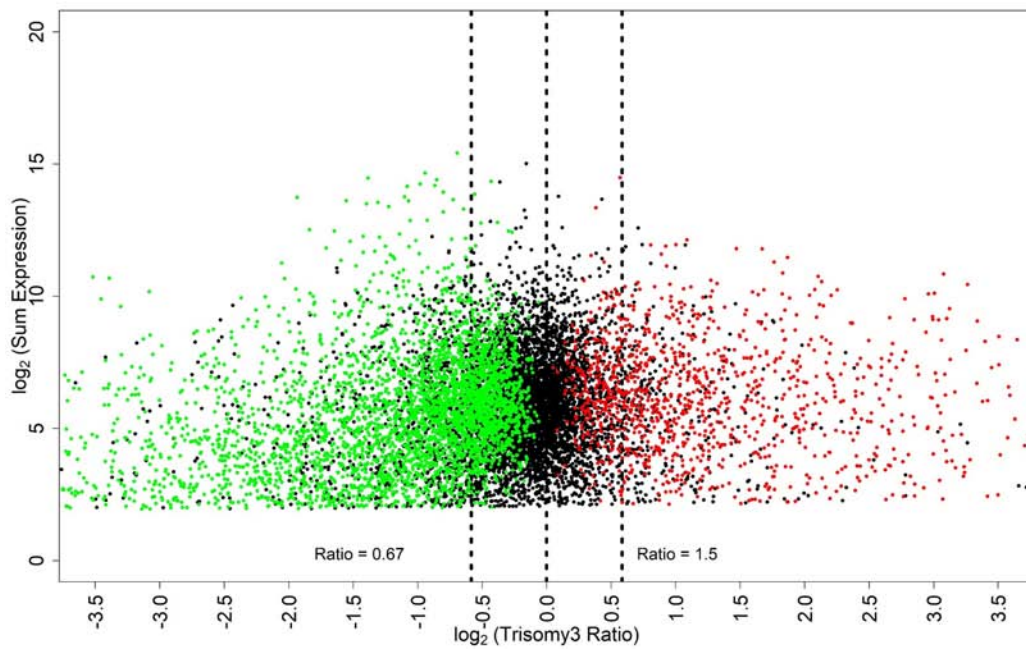

# Genes UM in both trisomy 4 and diploid

*cis*

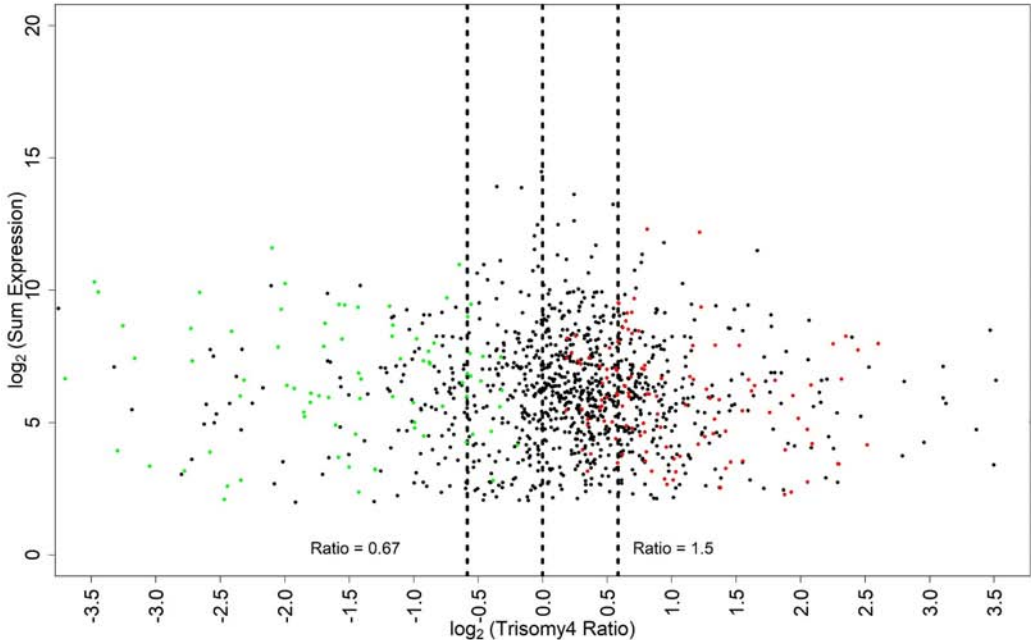

*trans*

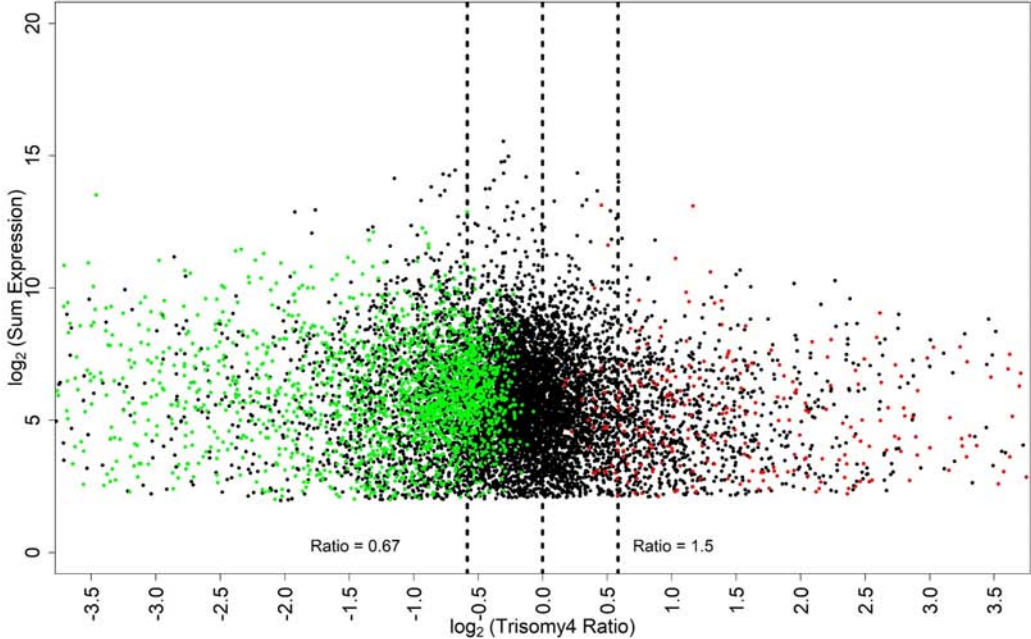

# Genes UM in both trisomy 5 and diploid

*cis*

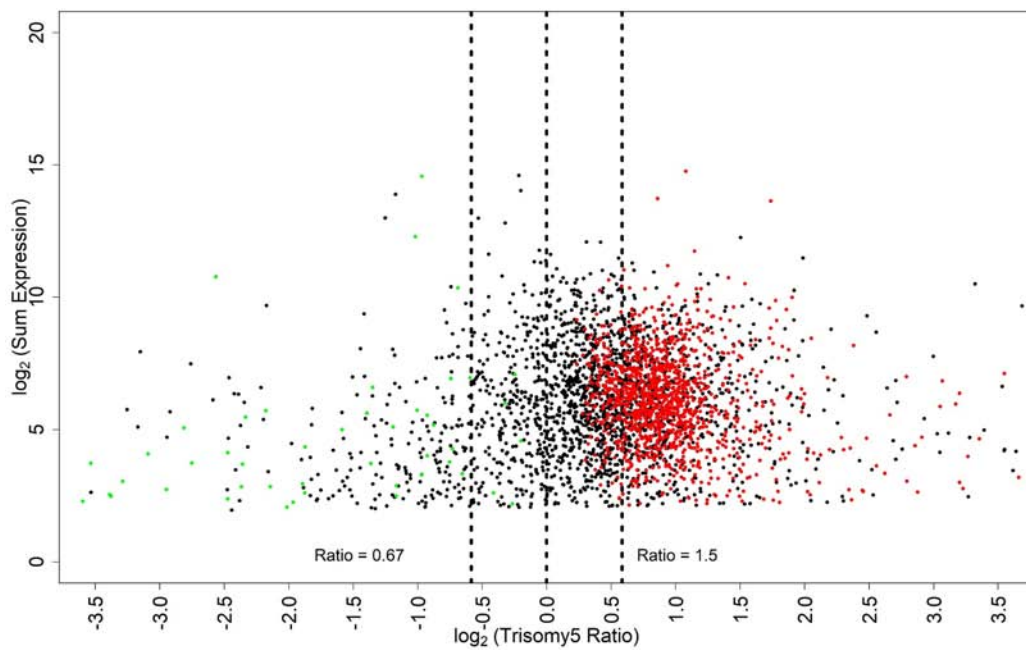

*trans*

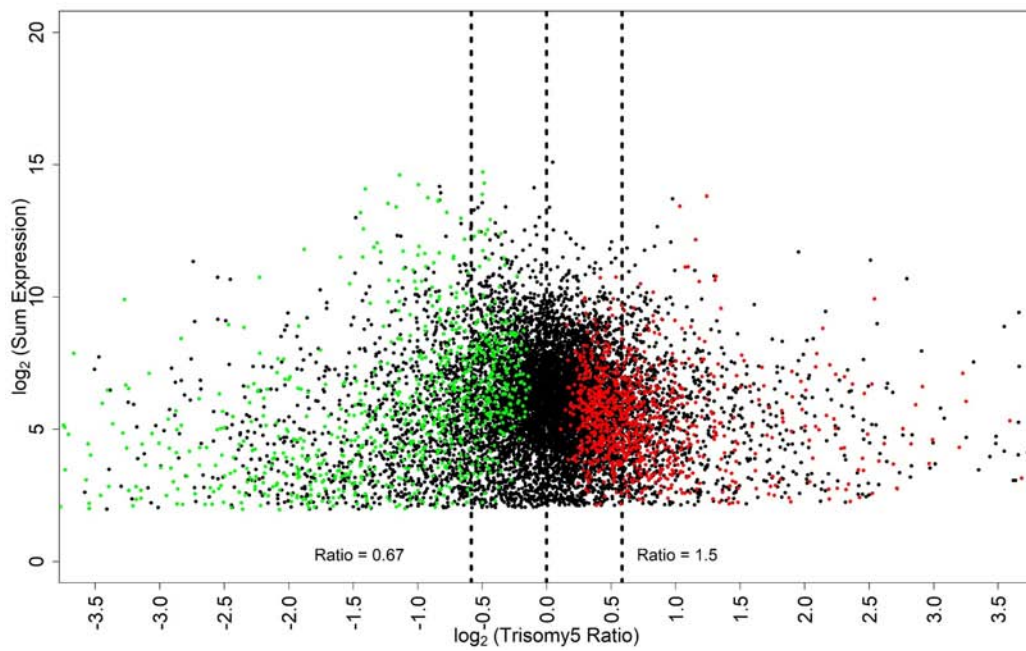

# Genes UM in both triploid and diploid

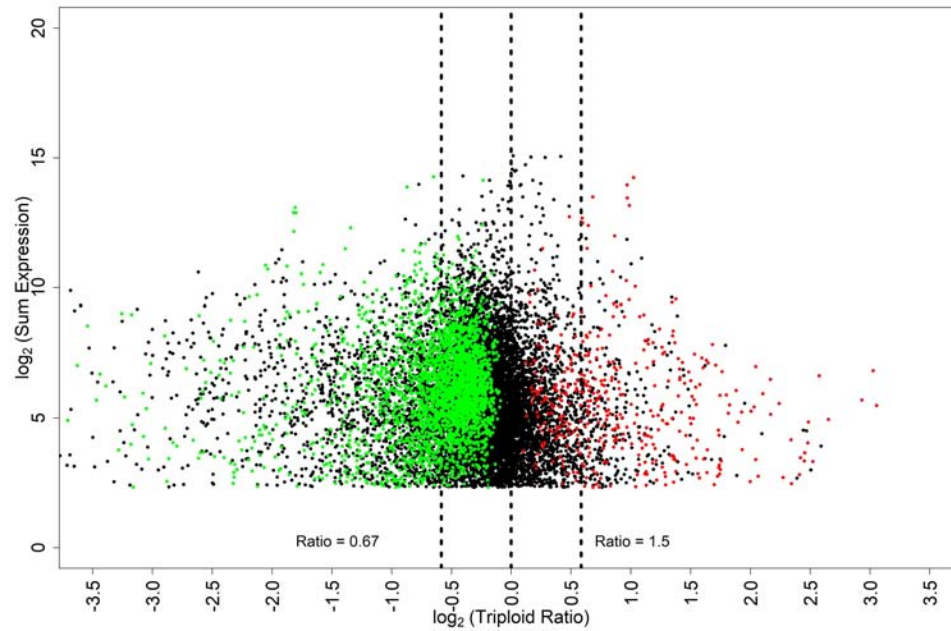

# Genes UM in both tetraploid and diploid

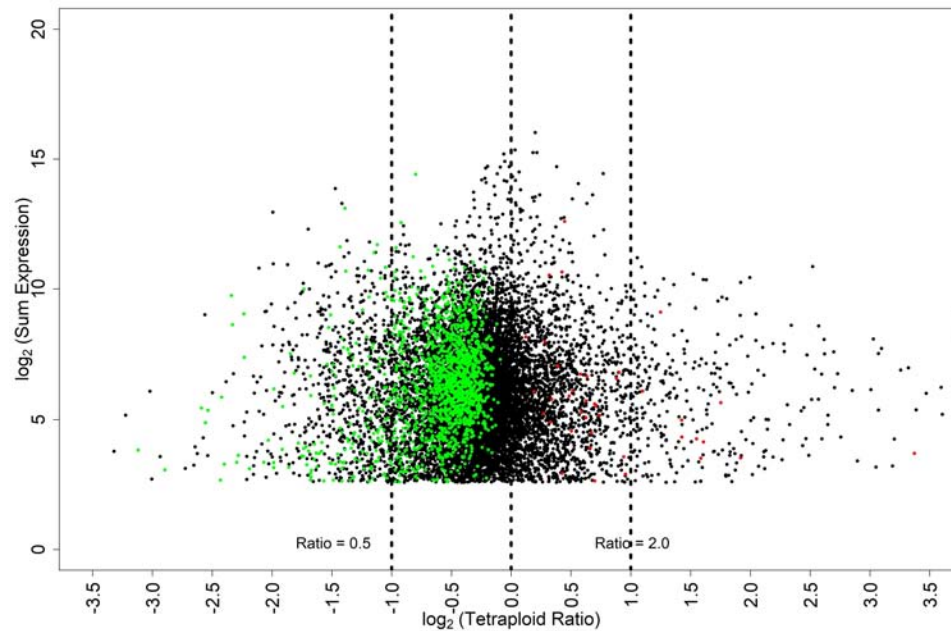



Fig. S14. Ratio distributions and scatter plots for the functional class of Polycomb repressive complex associated genes. Distributions were generated as described in Fig. 1 and scatter plots as described in Fig. S2.

# Trisomy 1: Polycomb repressive complex associated genes

*cis*

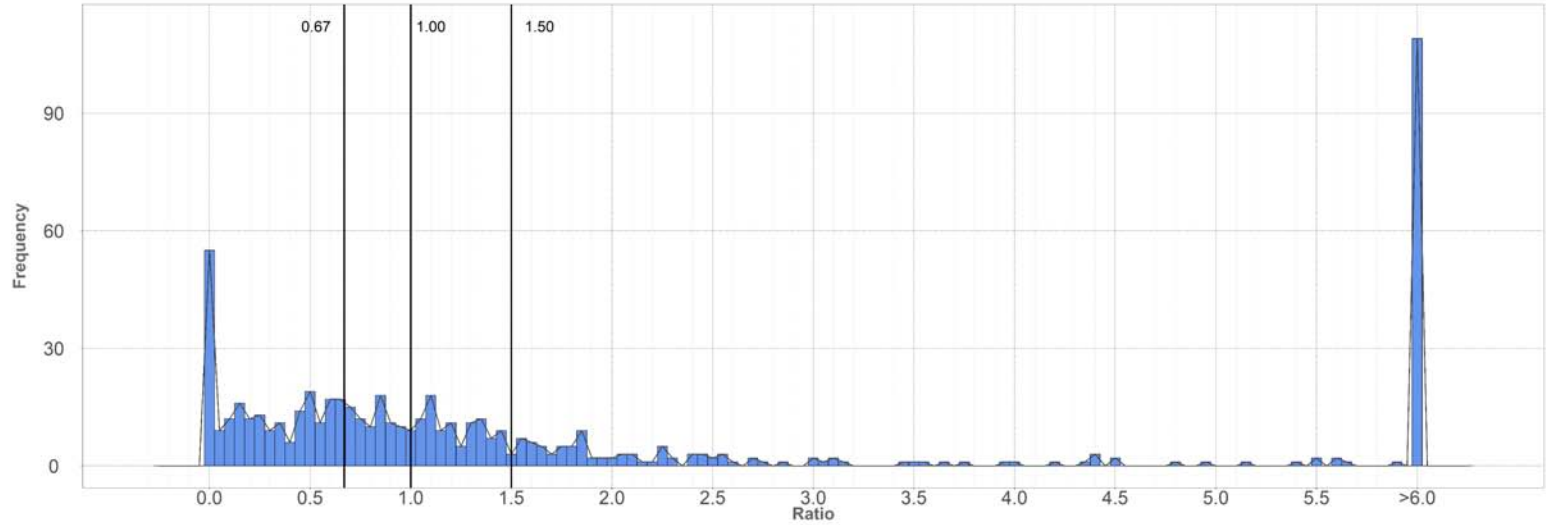

*trans*

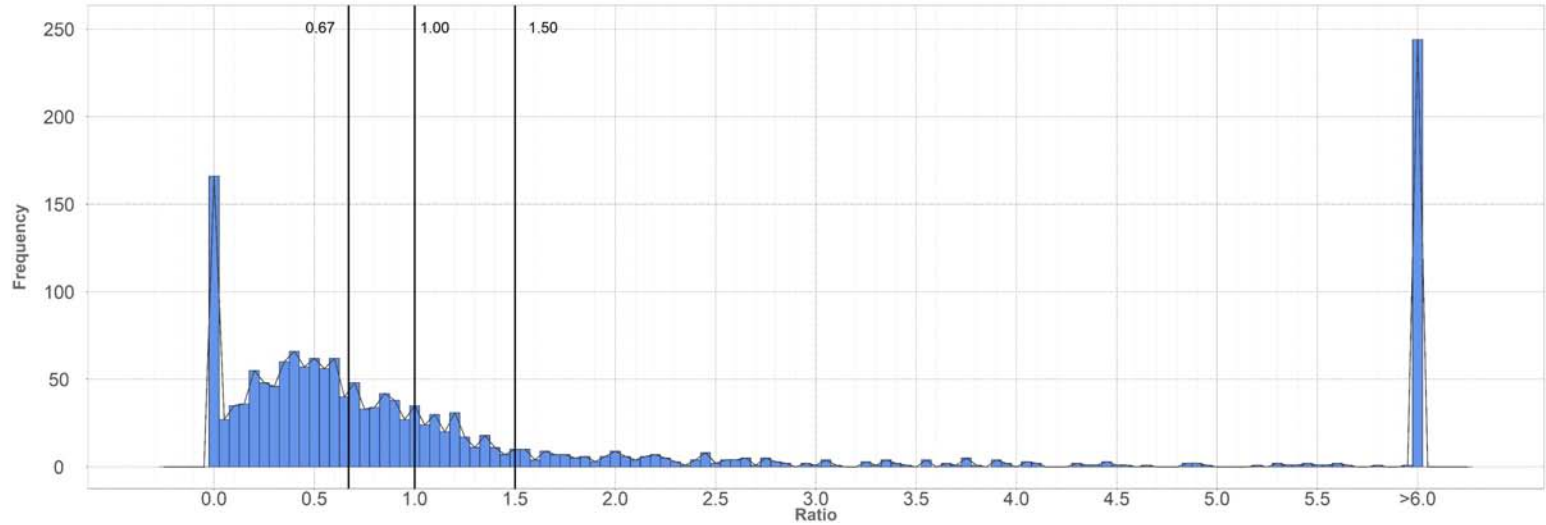

# Trisomy 2: Polycomb repressive complex associated genes

*cis*

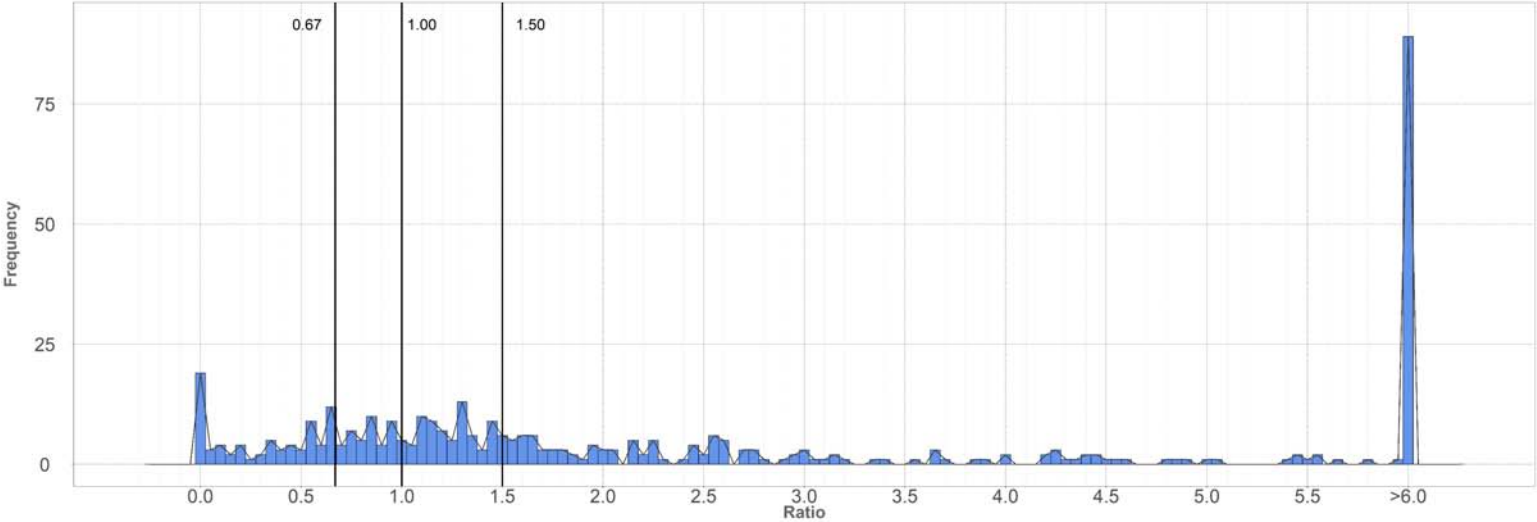

*trans*

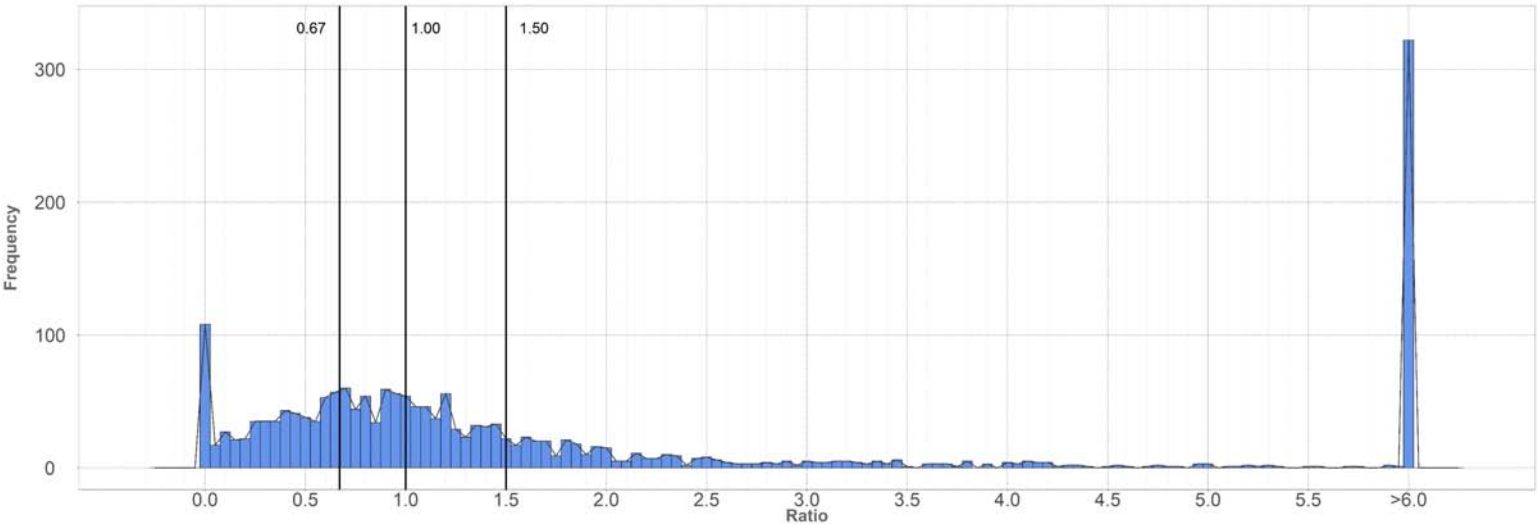

# Trisomy 3: Polycomb repressive complex associated genes

*cis*

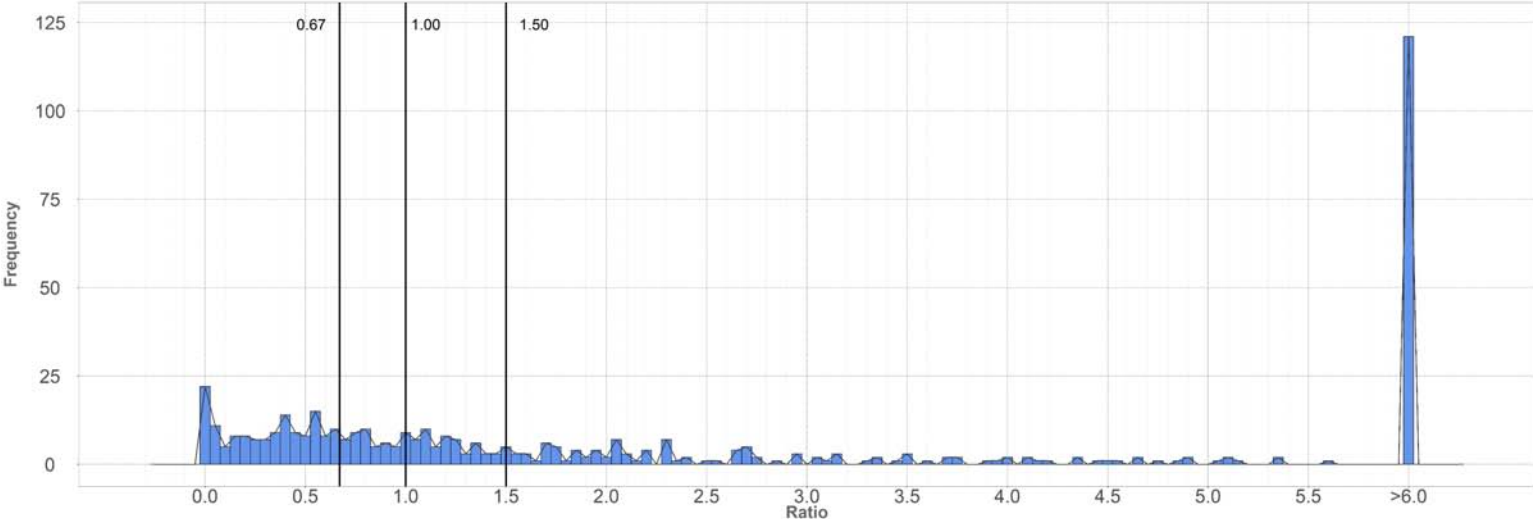

*trans*

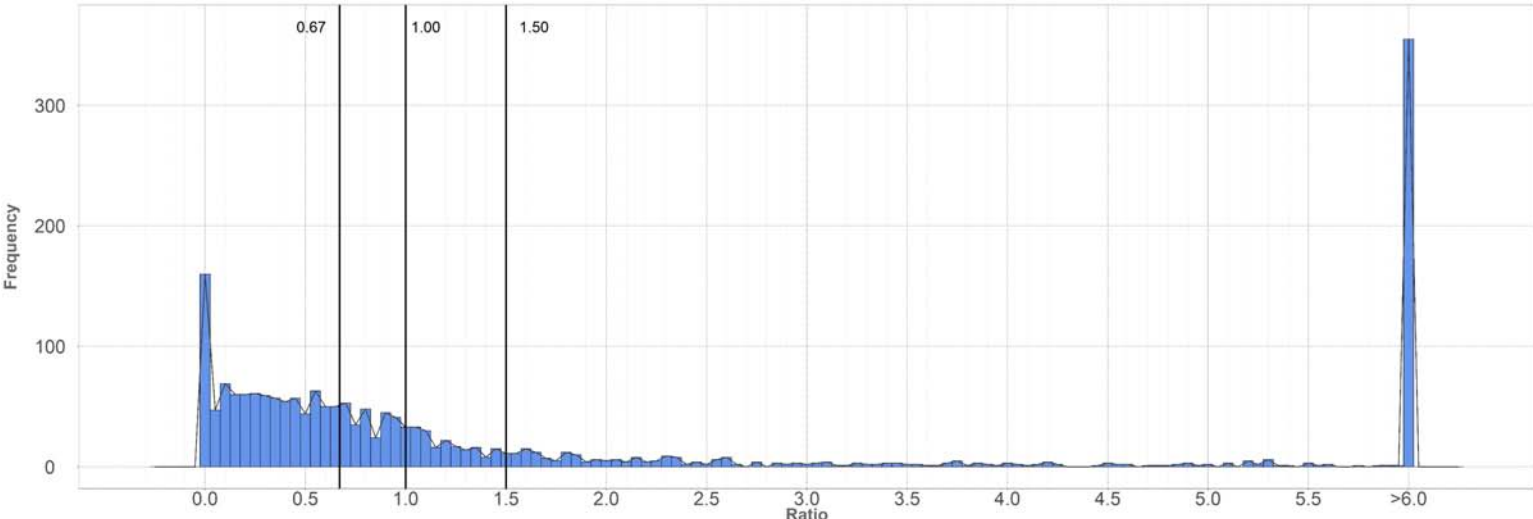

# Trisomy 4: Polycomb repressive complex associated genes

*cis*

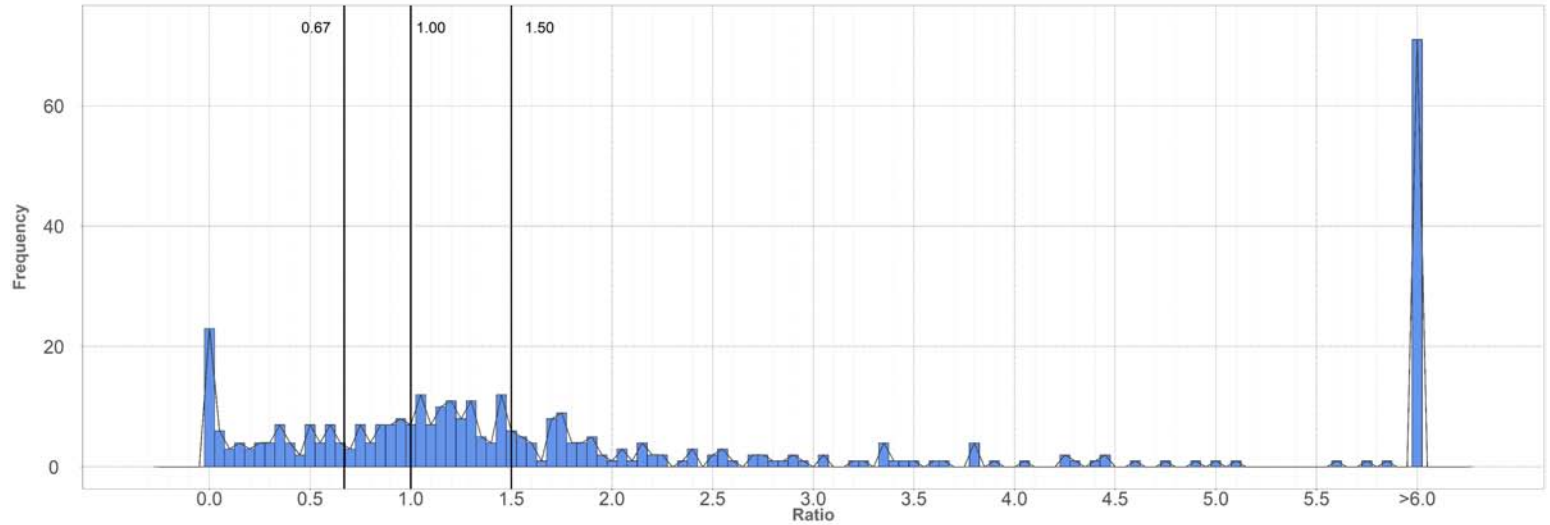

*trans*

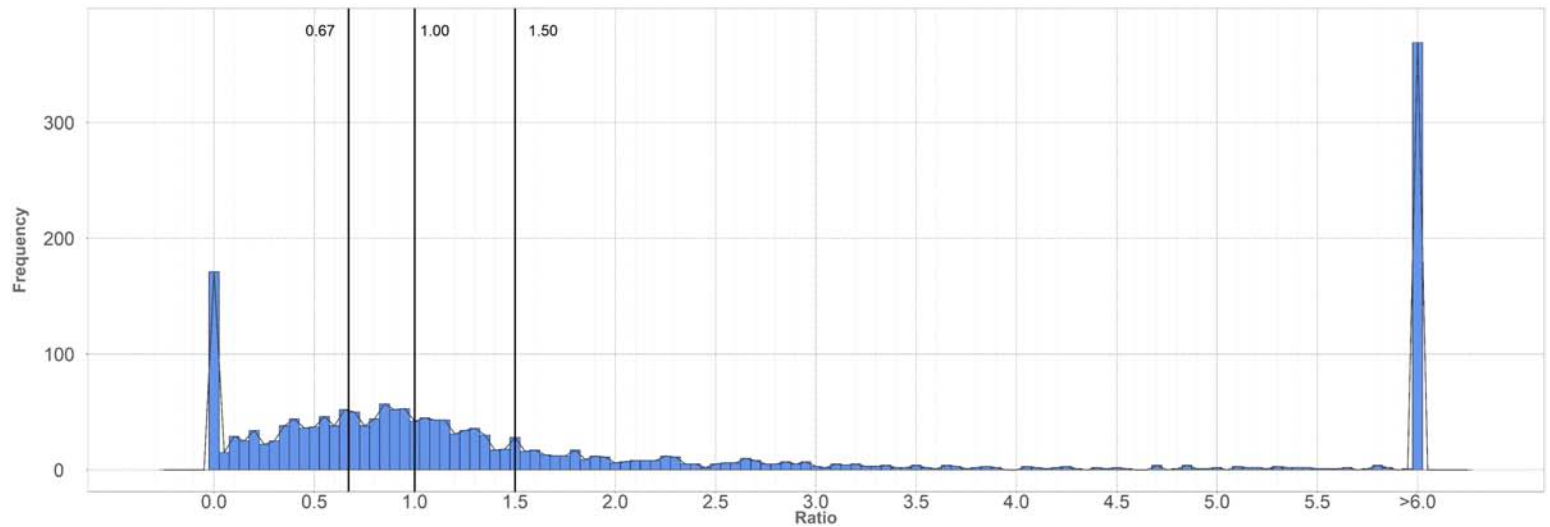

# Trisomy 5: Polycomb repressive complex associated genes

*cis*

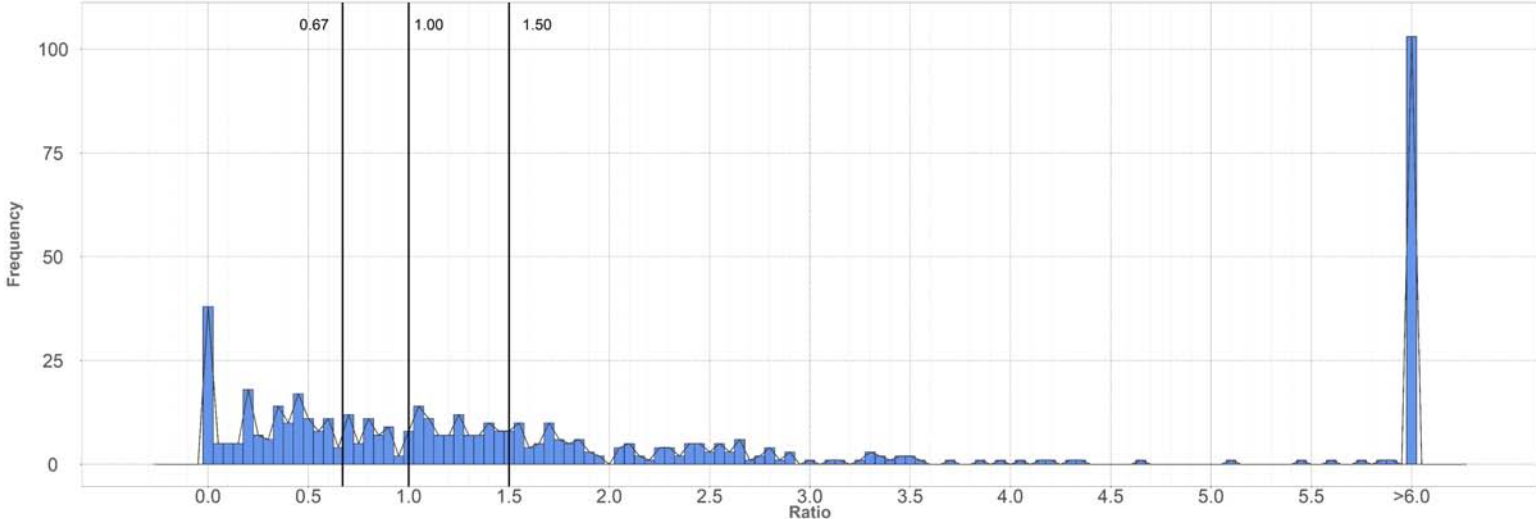

*trans*

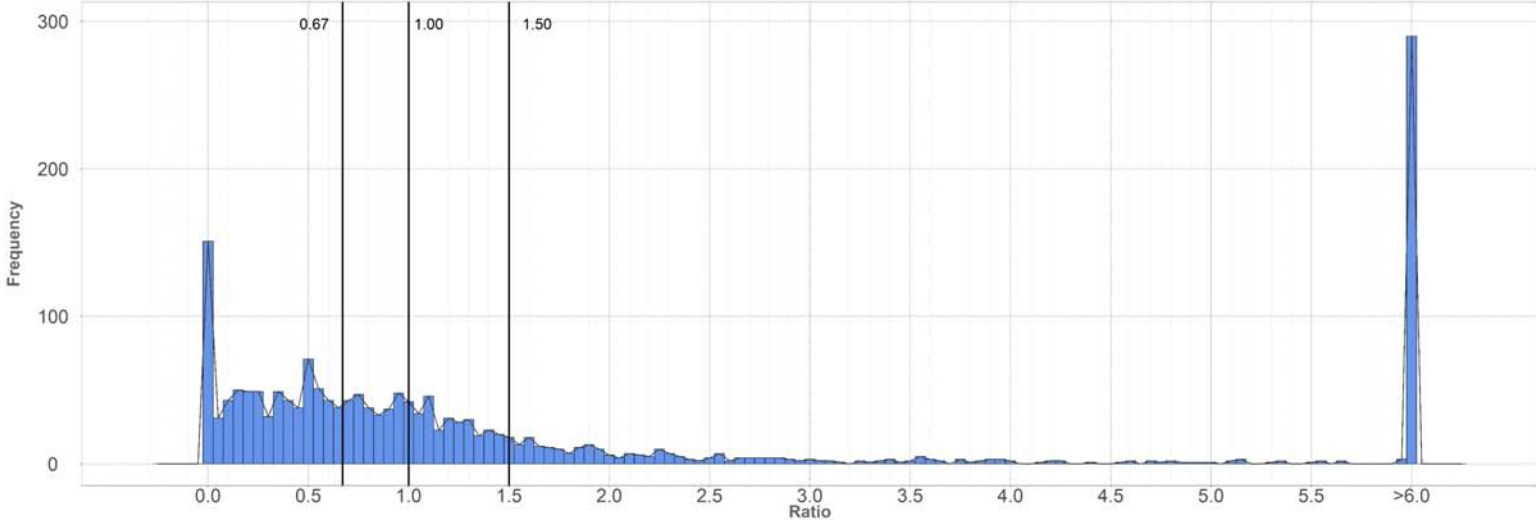

# Trisomy 1: Polycomb repressive complex associated genes

*cis*

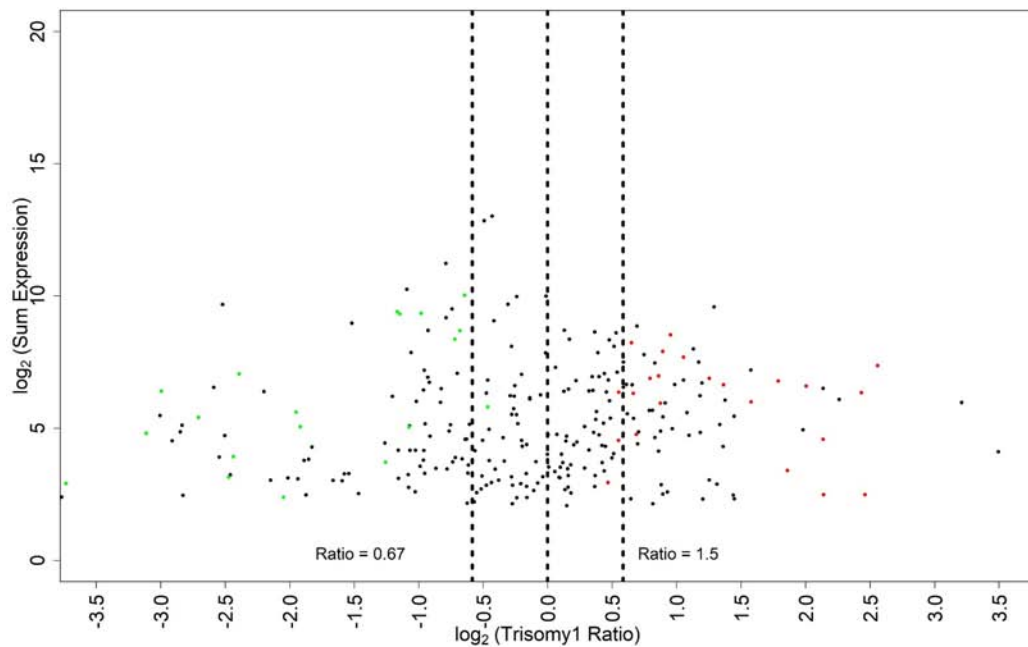

*trans*

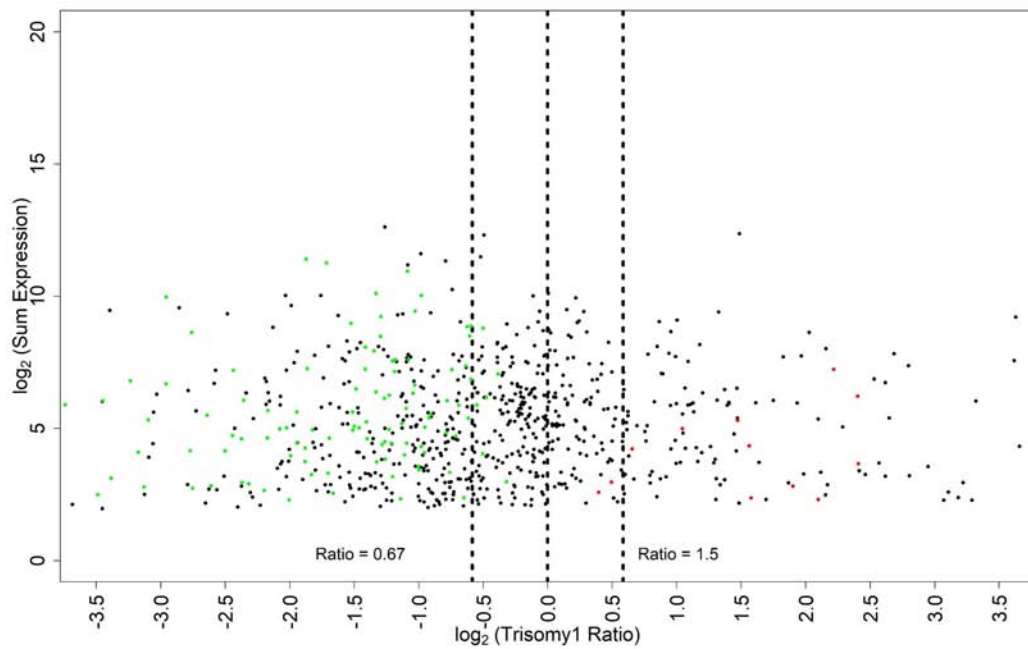

# Trisomy 2: Polycomb repressive complex associated genes

*cis*

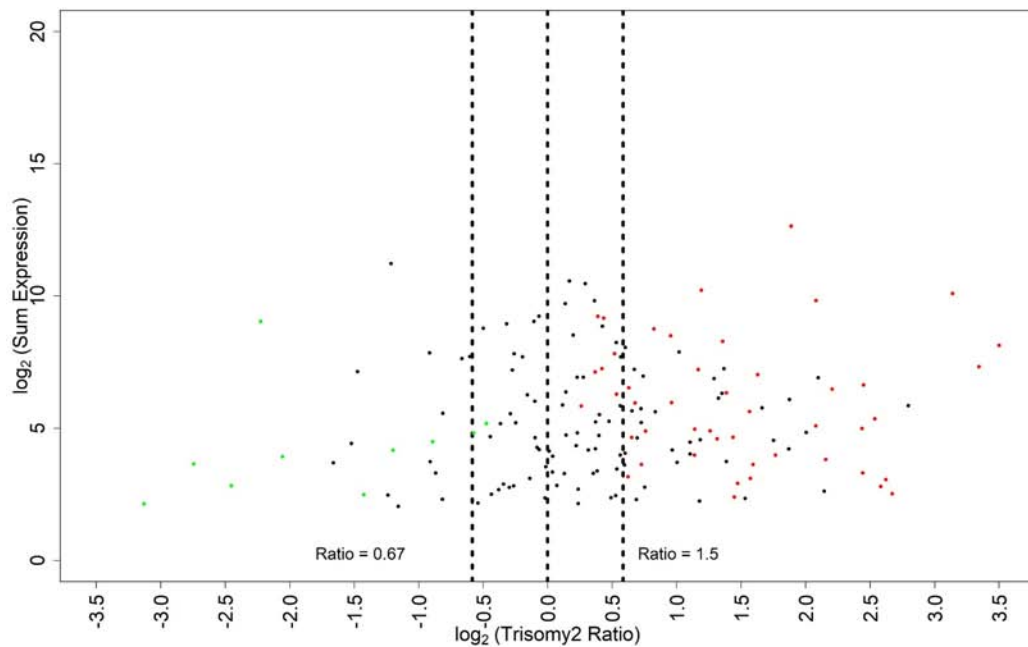

*trans*

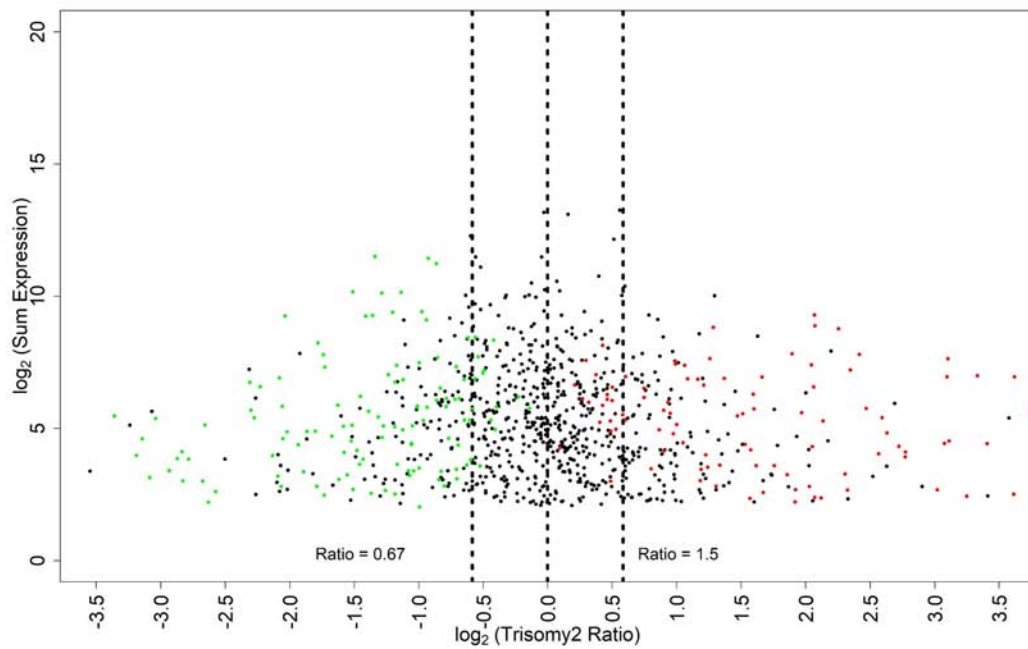



# Trisomy 3: Polycomb repressive complex associated genes

*cis*

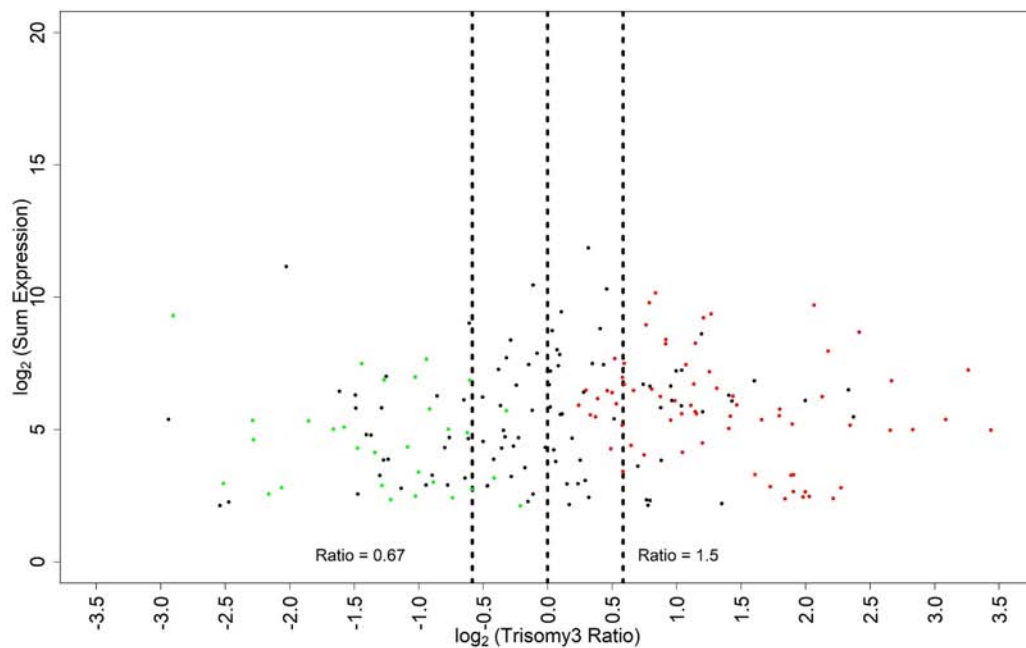

*trans*

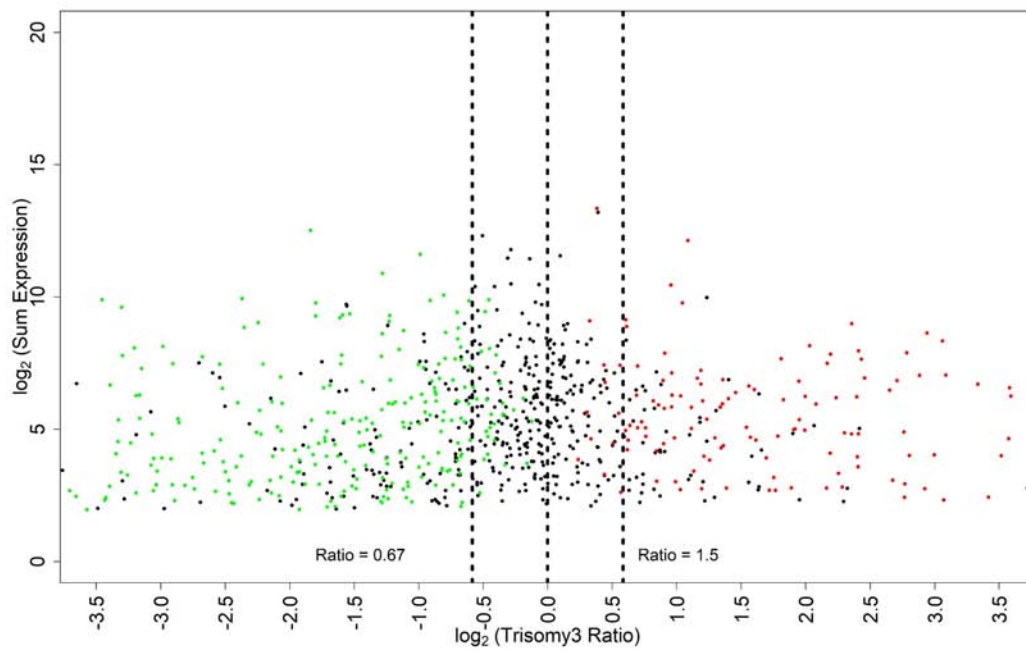

# Trisomy 4: Polycomb repressive complex associated genes

*cis*

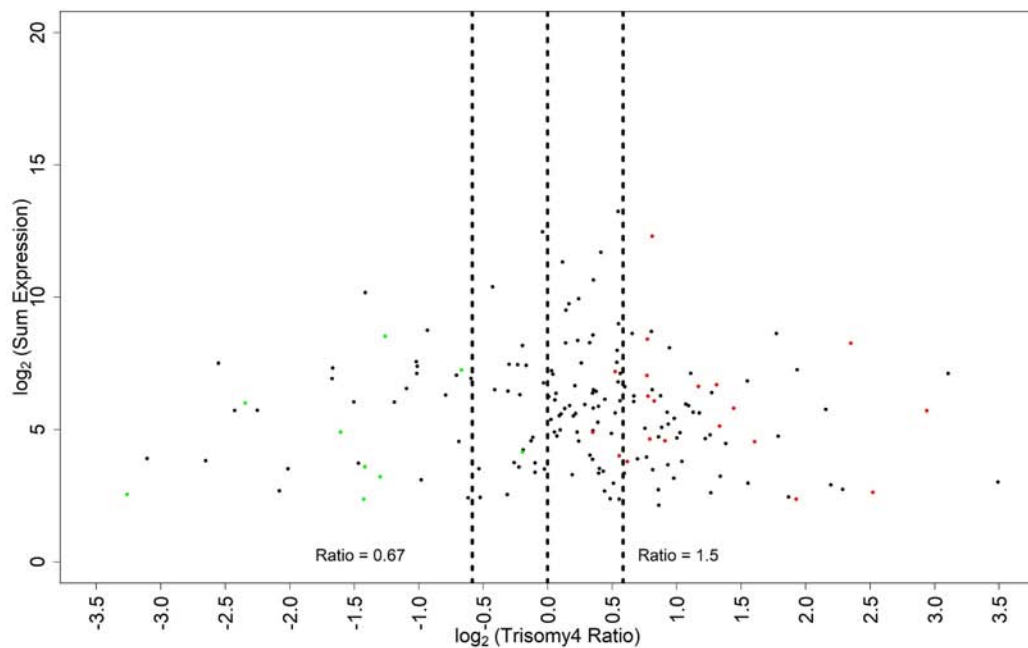

*trans*

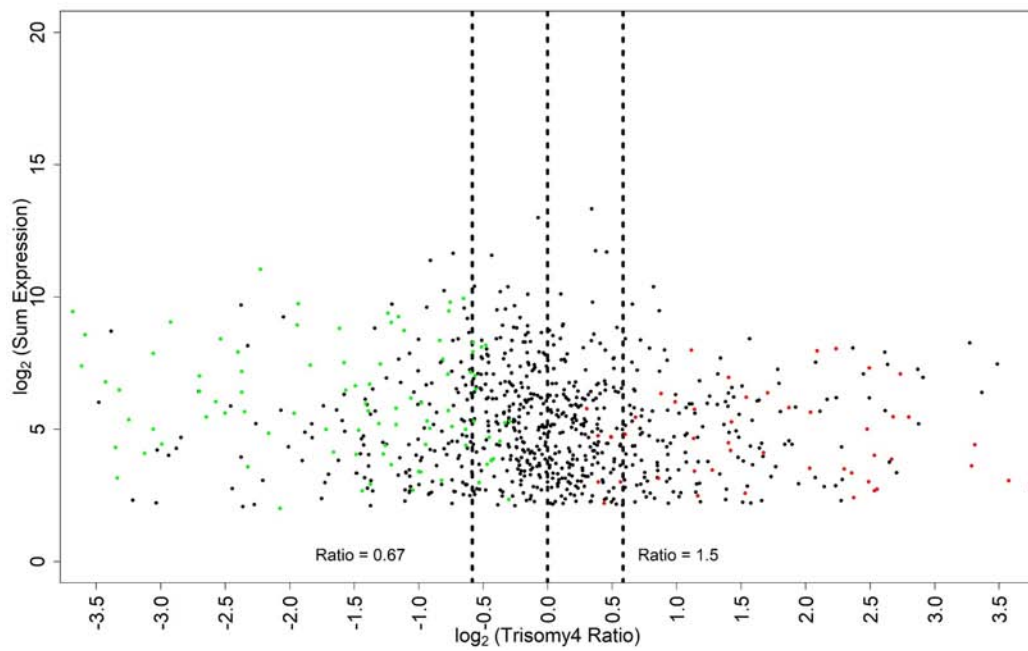

# Trisomy 5: Polycomb repressive complex associated genes

*cis*

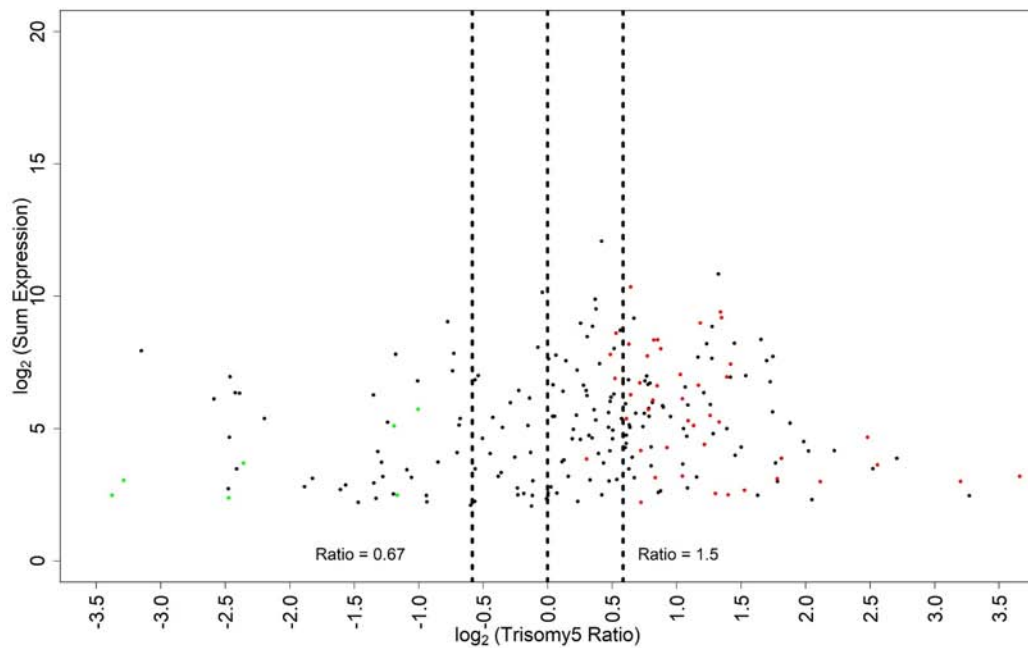

*trans*

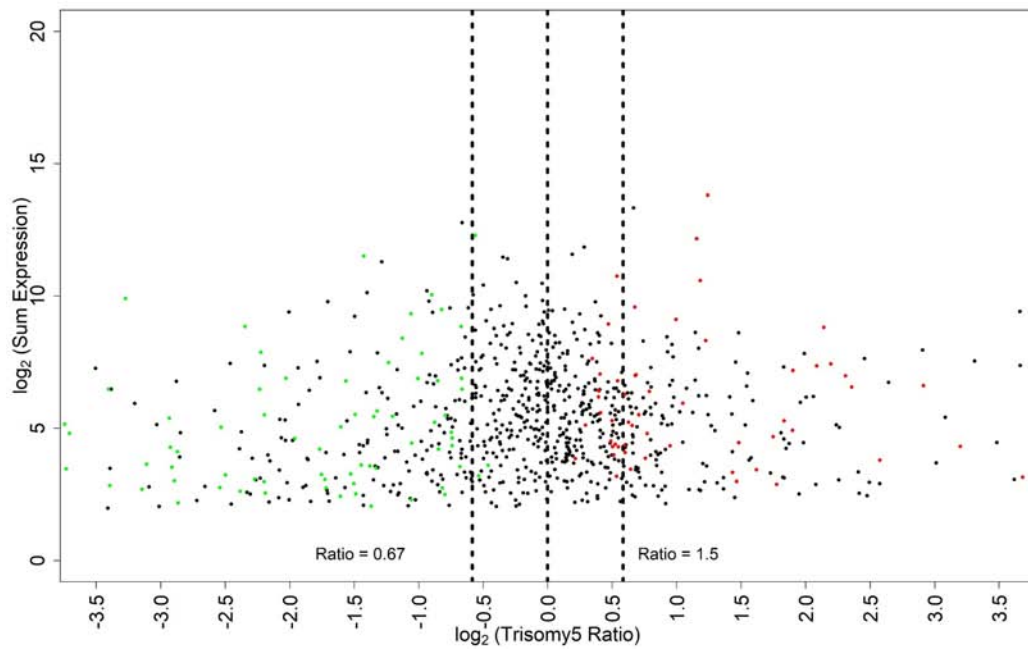

# Polycomb repressive complex associated genes

Triploid

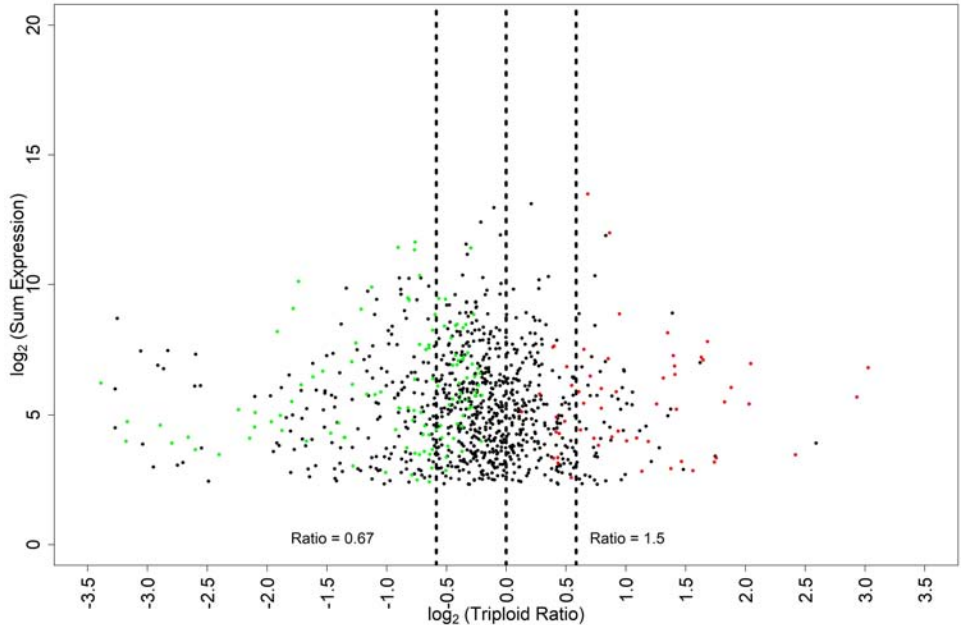

Tetraploid

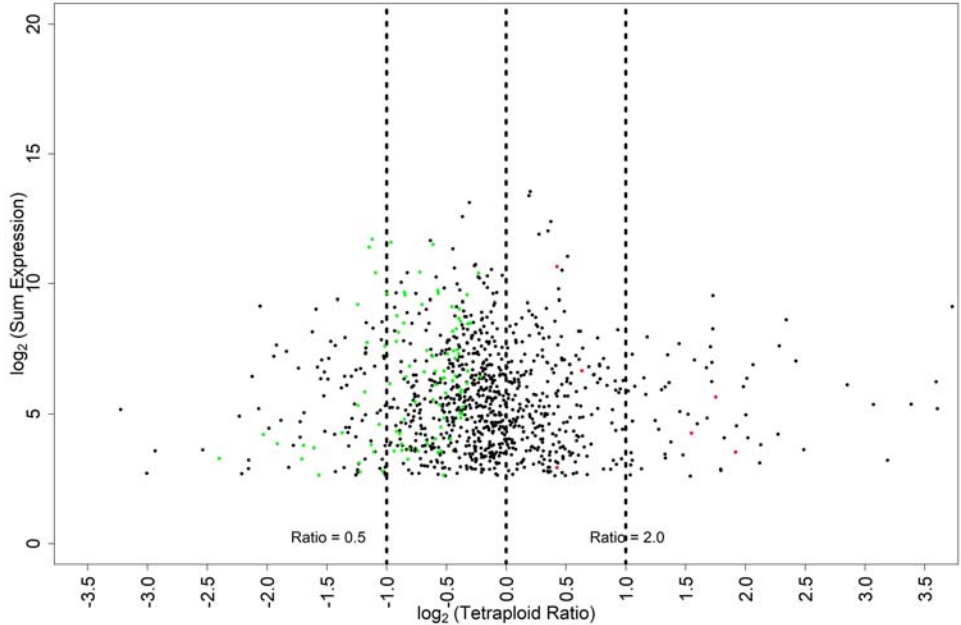

Fig. S15. Ratio distributions and scatter plots for cis transcription factors and their targets in cis and trans and for trans affected transcription factors together with cis varied target and targets that are unvaried. Distributions were generated as described in Fig. 1 and scatter plots as described in Fig. S2.

# Trisomy 1

*Cis* transcription factors

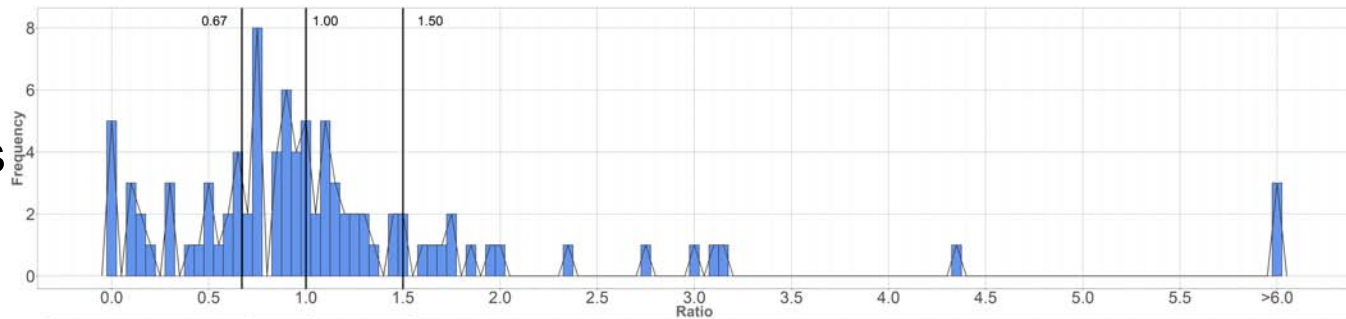

Targeted *cis* genes

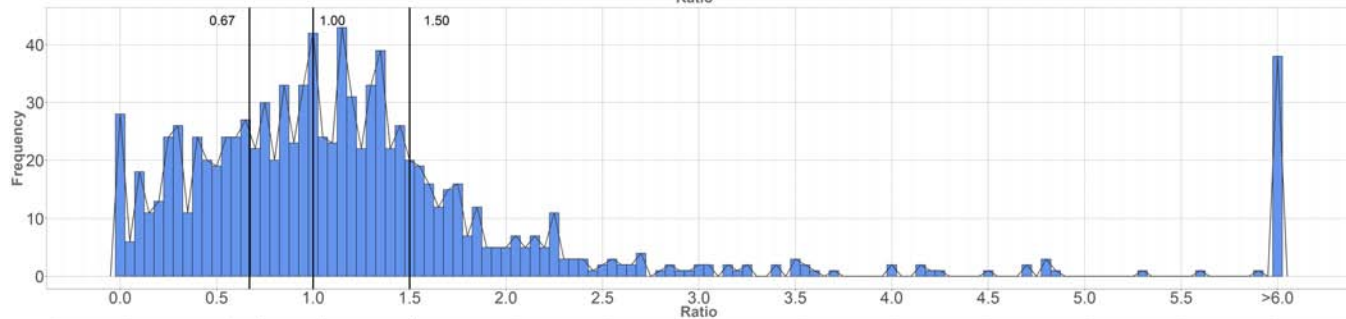

Targeted *trans* genes

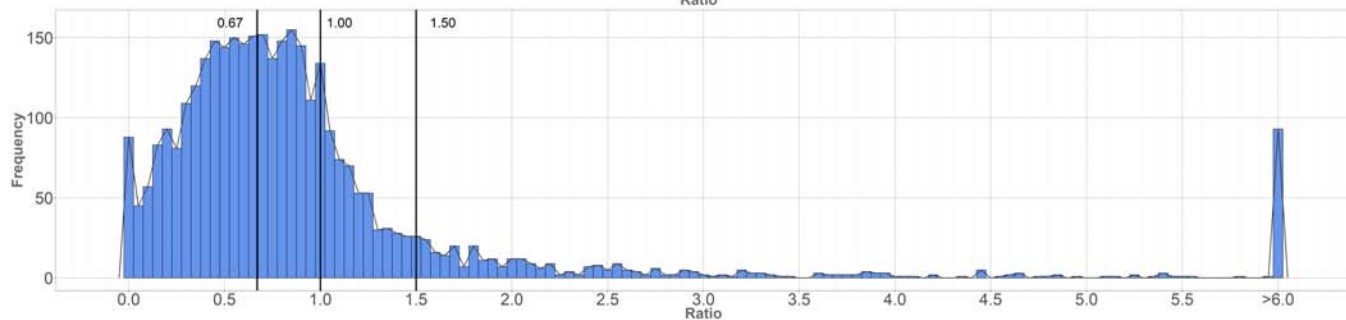

# Trisomy 2

*Cis* transcription factors

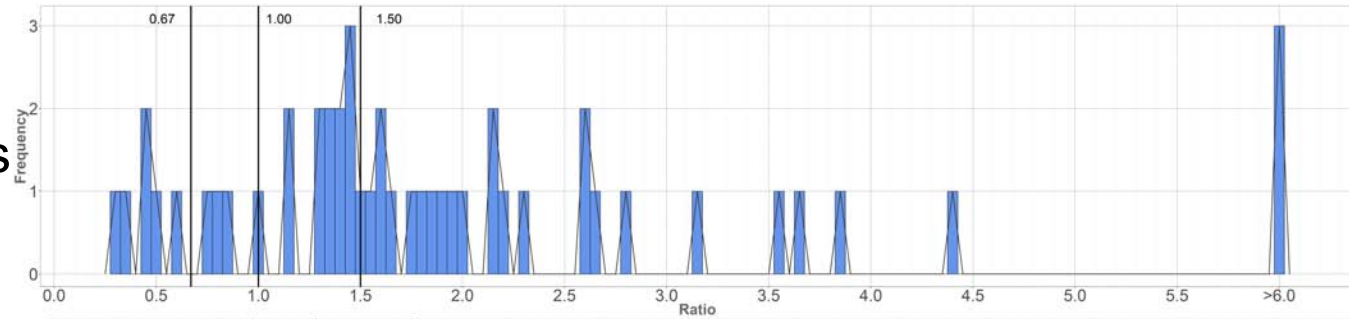

Targeted *cis* genes

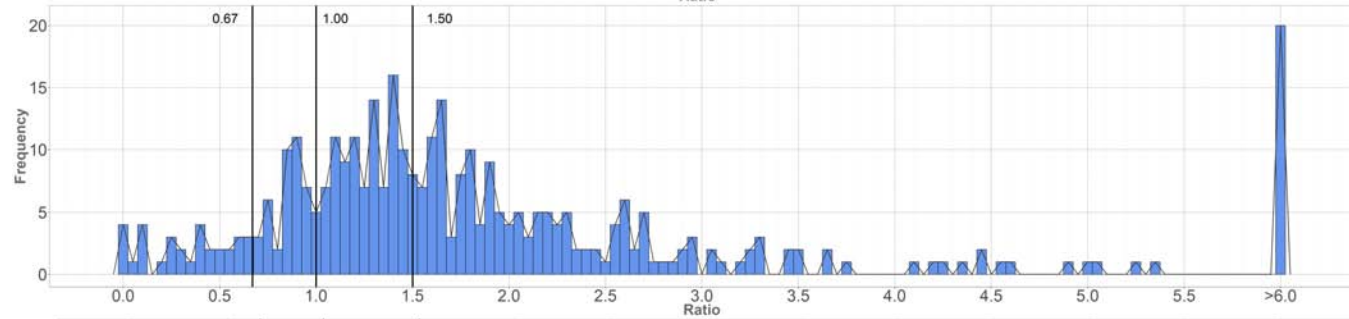

Targeted *trans* genes

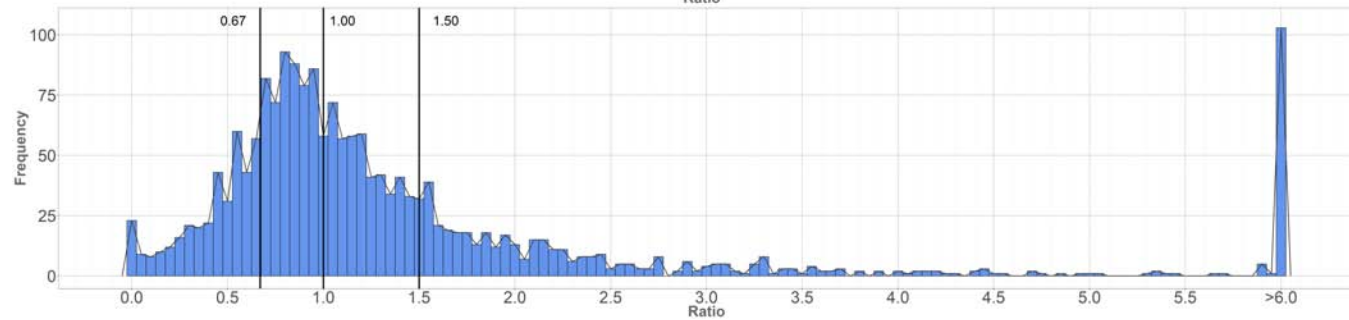

# Trisomy 3

*Cis* transcription factors

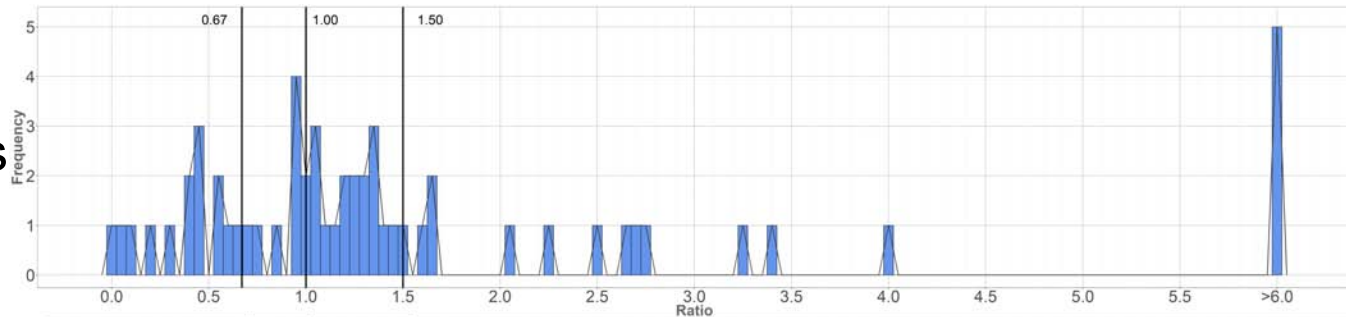

Targeted *cis* genes

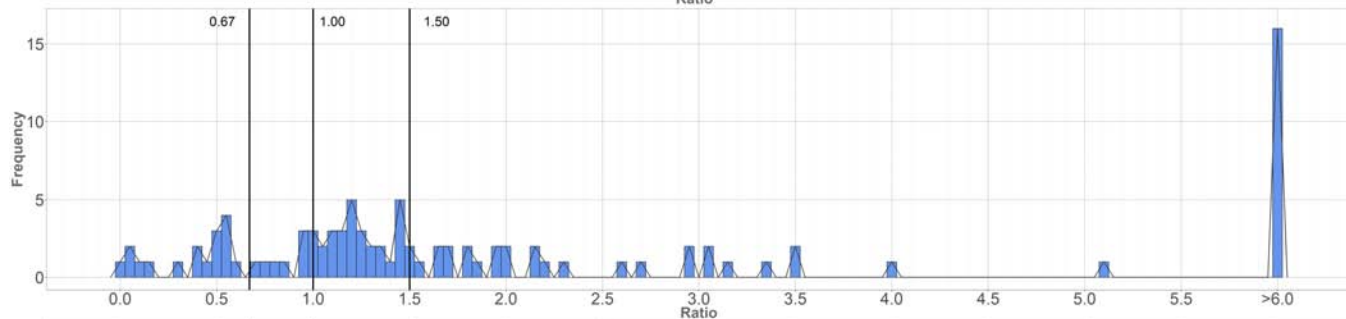

Targeted *trans* genes

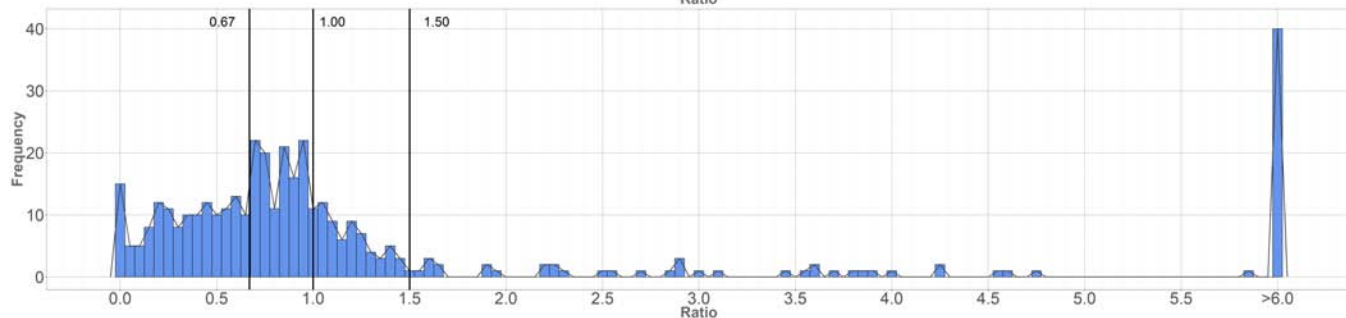



# Trisomy 4

*Cis* transcription factors

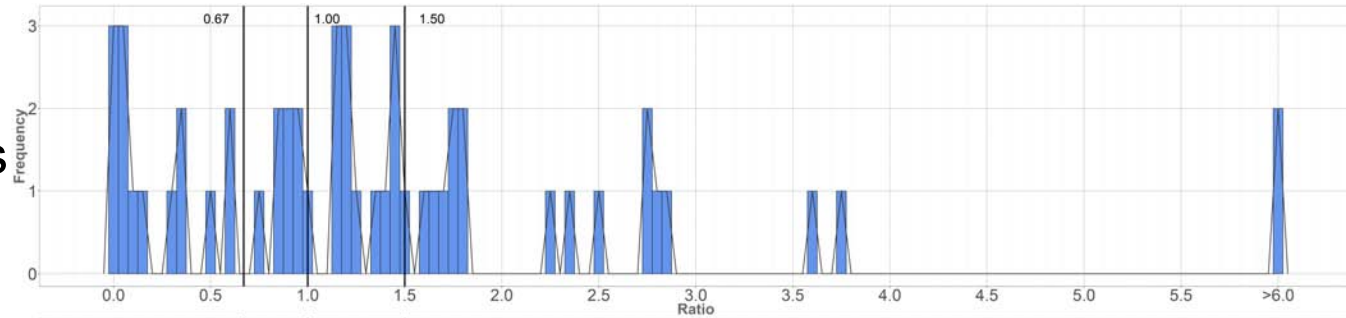

Targeted *cis* genes

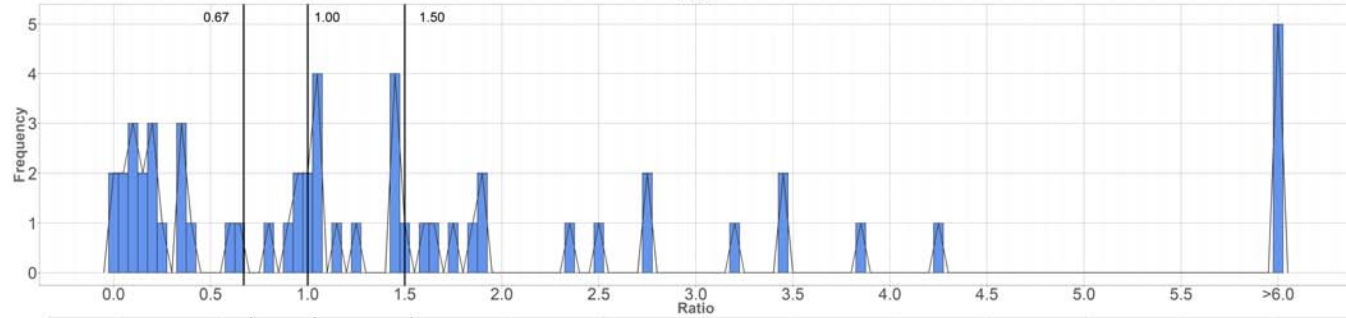

Targeted *trans* genes

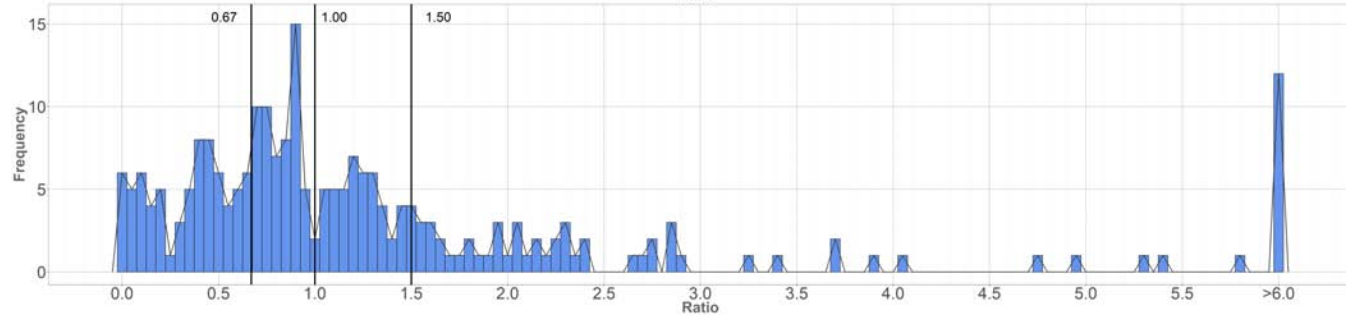

# Trisomy 5

*Cis* transcription factors

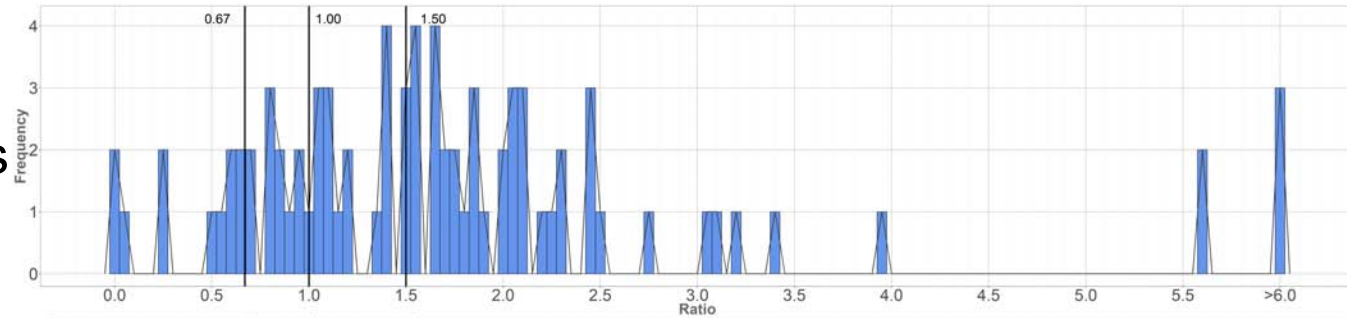

Targeted *cis* genes

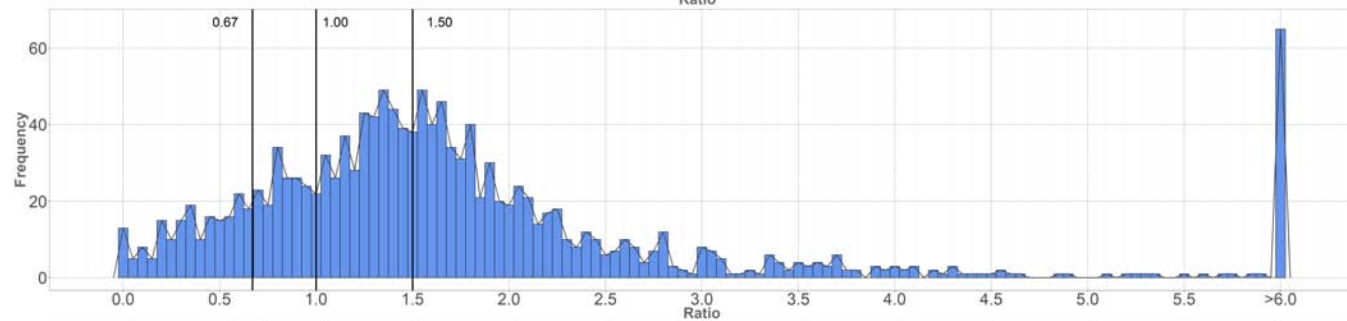

Targeted *trans* genes

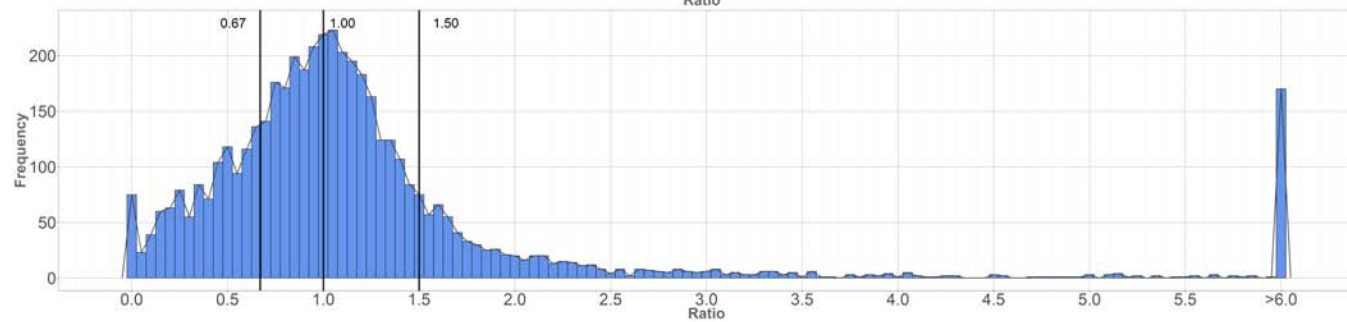

# Trisomy 1

*Trans* affected transcription factors

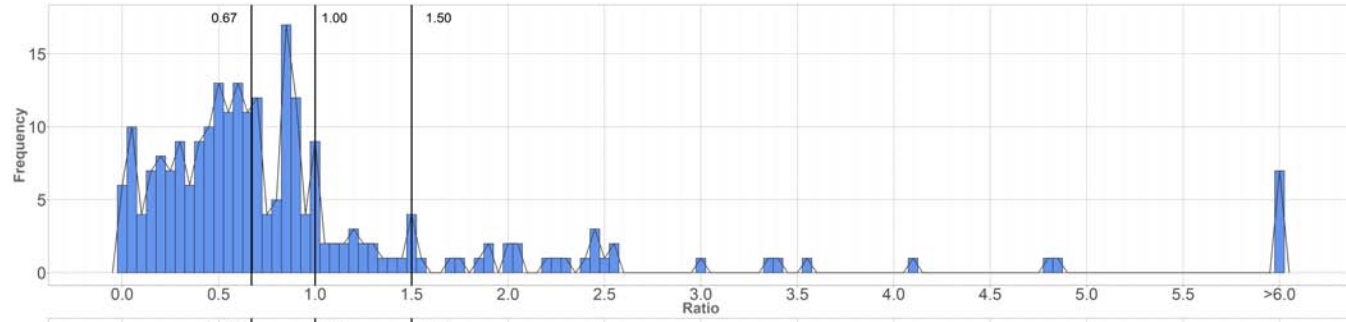

Targeted *cis* genes

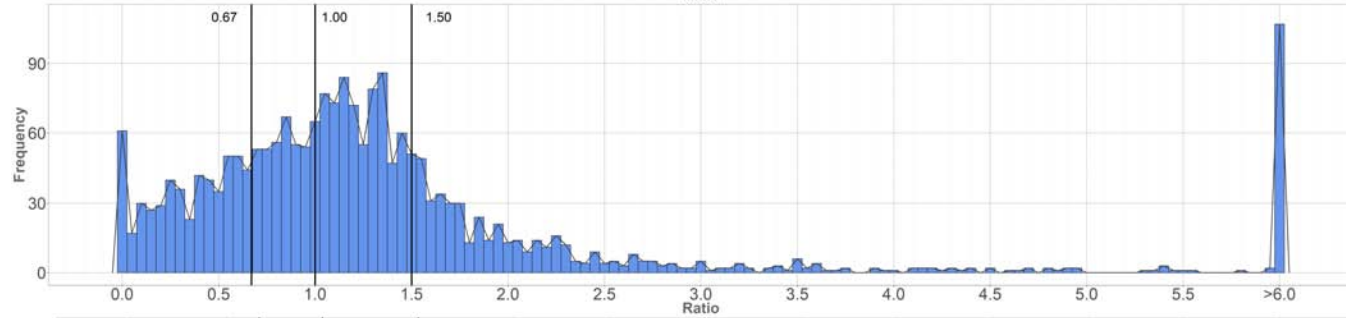

Targeted *trans* genes

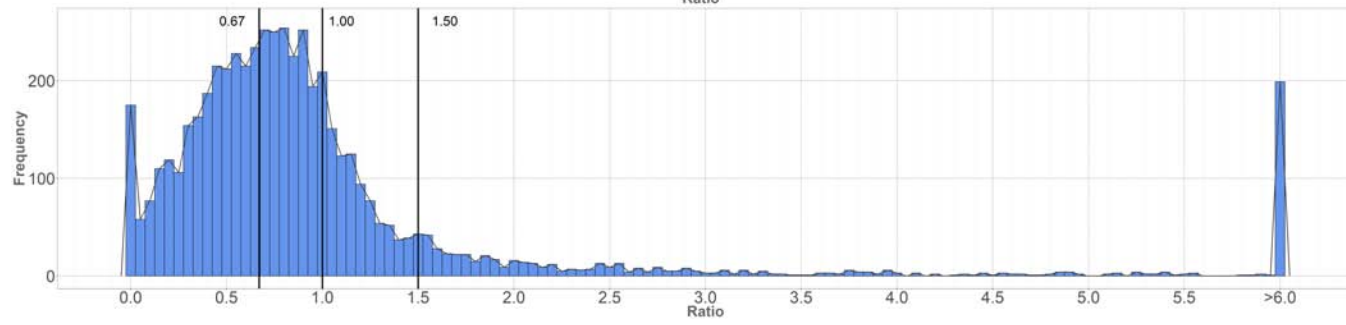

# Trisomy 2

*Trans* affected transcription factors

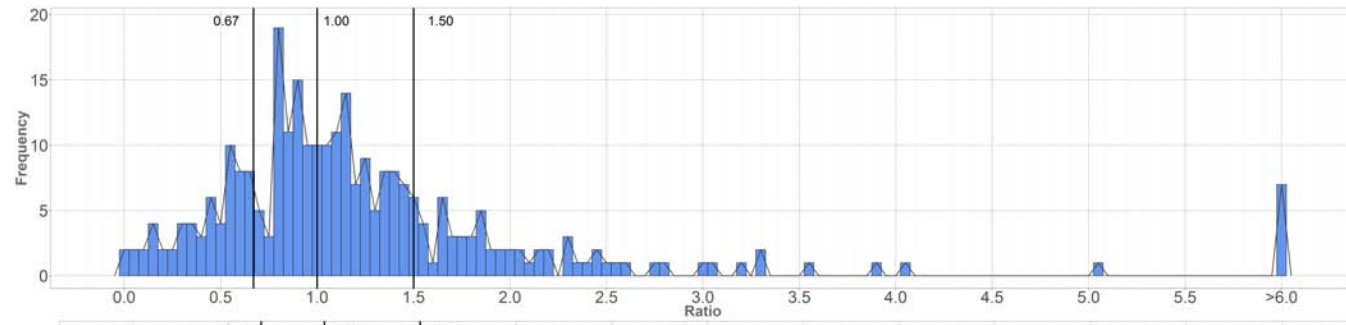

Targeted *cis* genes

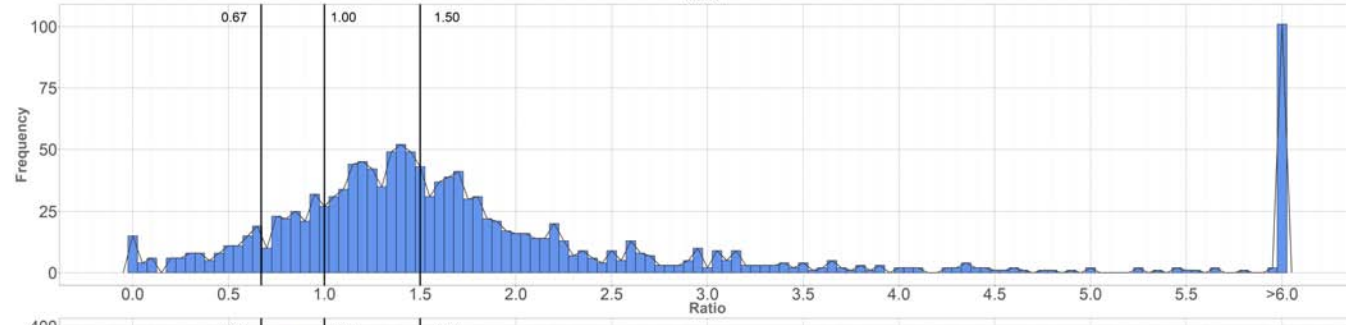

Targeted *trans* genes

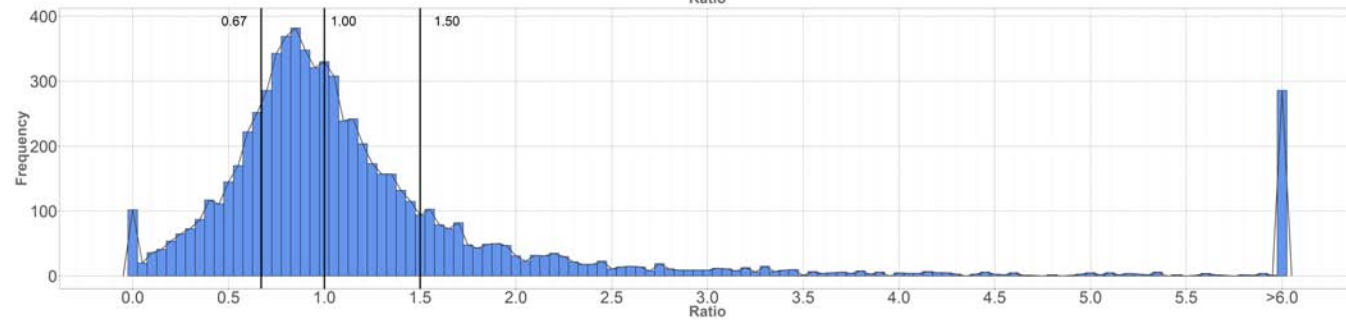

# Trisomy 3

*Trans* affected transcription factors

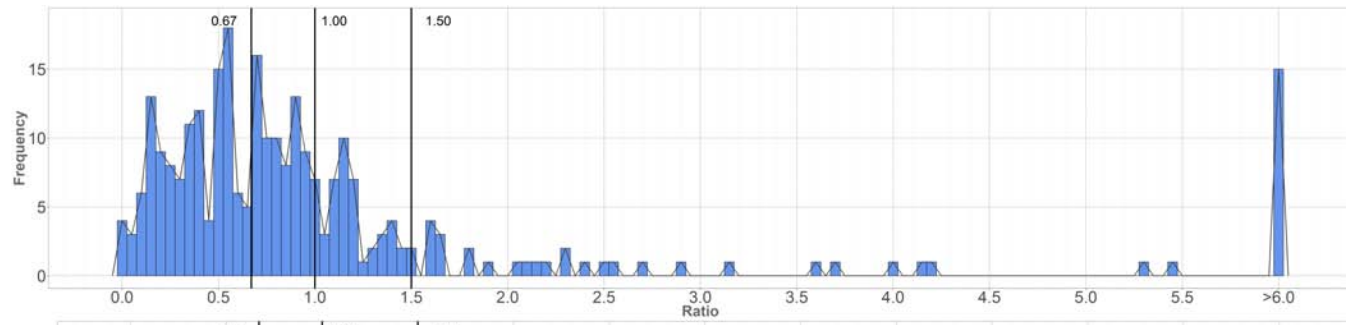

Targeted *cis* genes

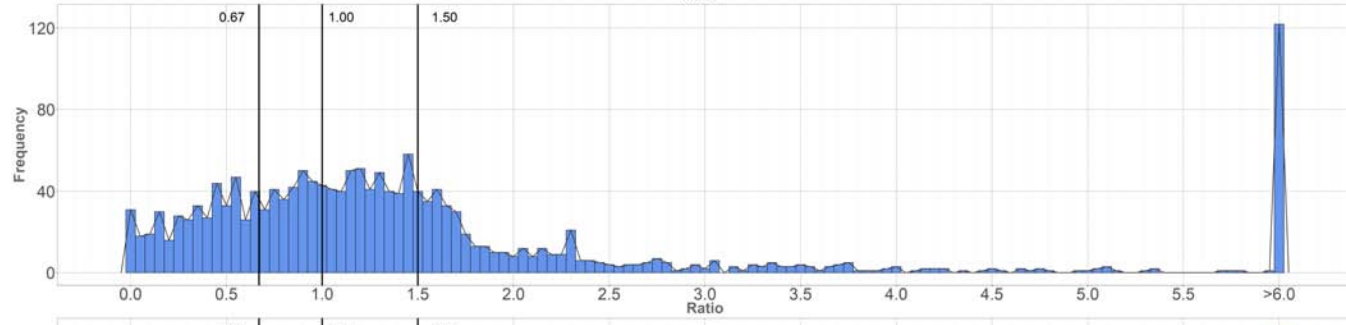

Targeted *trans* genes

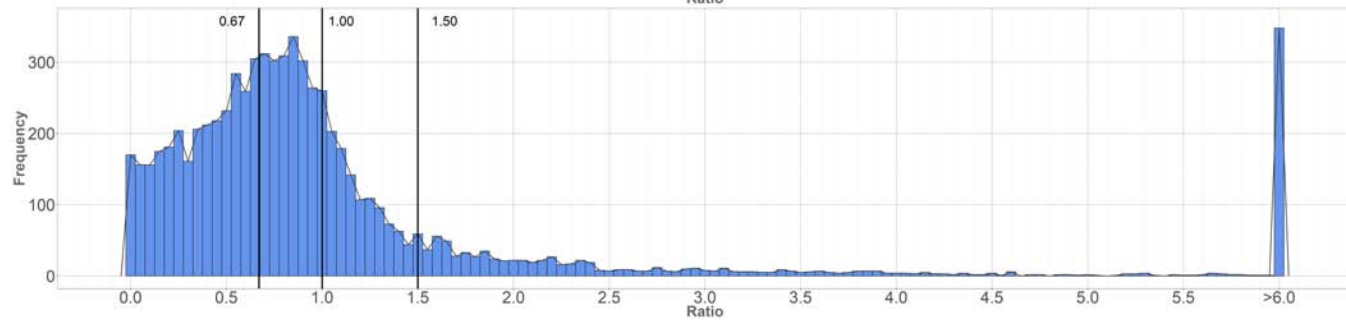

# Trisomy 4

*Trans* affected  
transcription factors

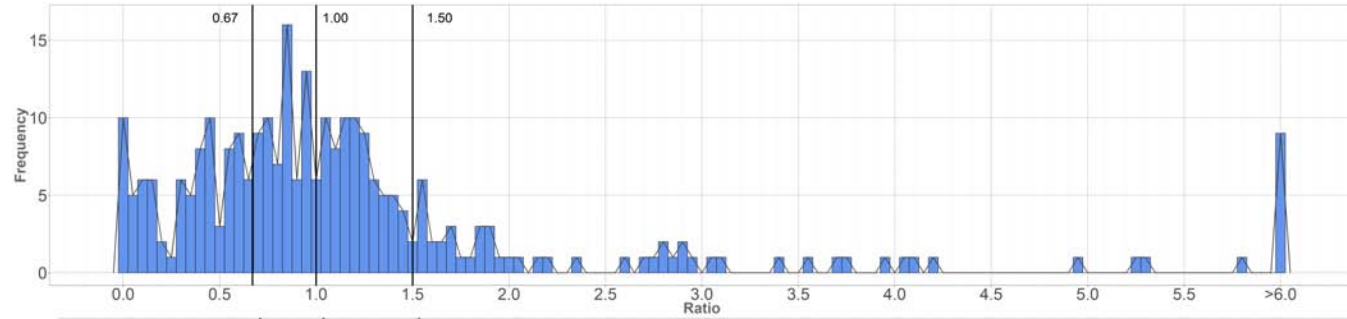

Targeted *cis* genes

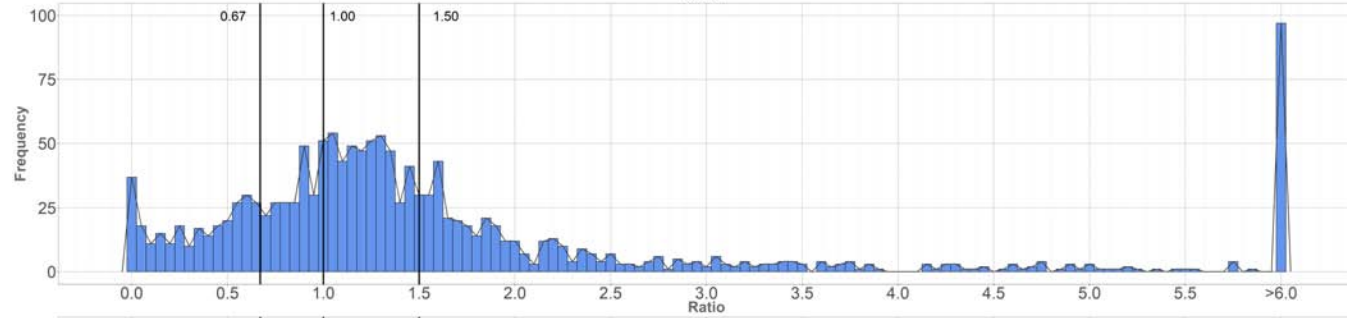

Targeted *trans* genes

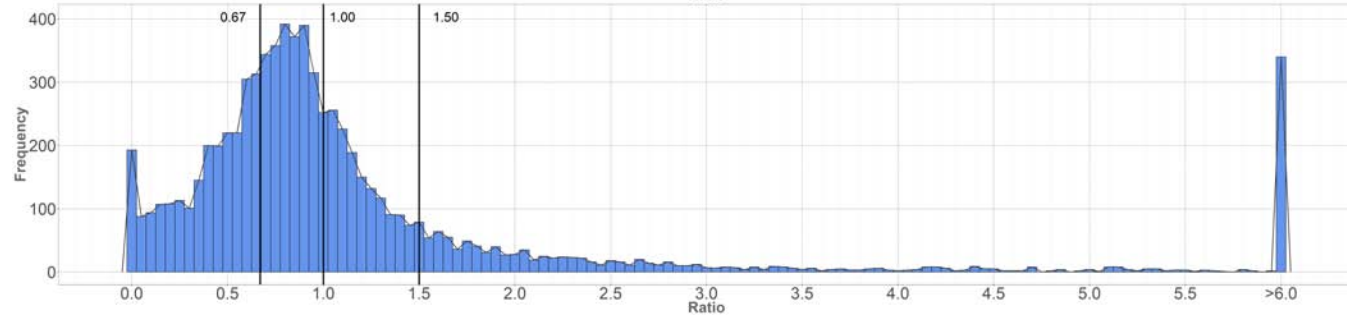

# Trisomy 5

*Trans* affected transcription factors

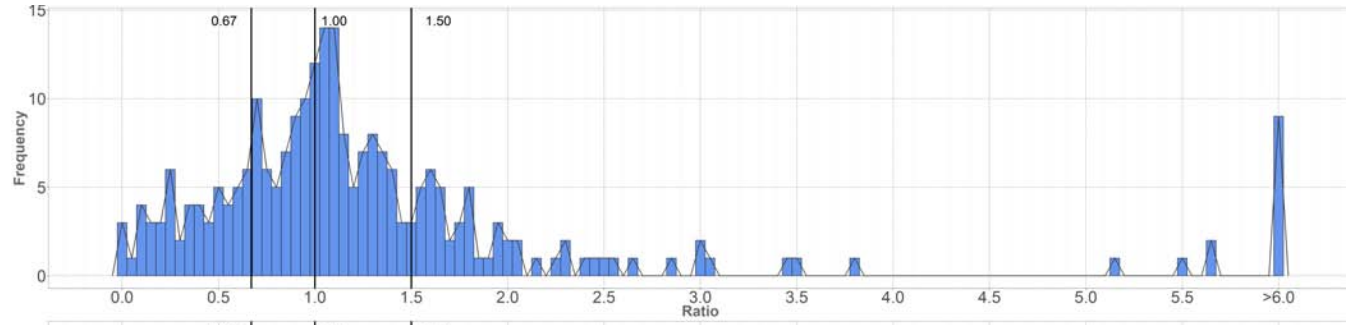

Targeted *cis* genes

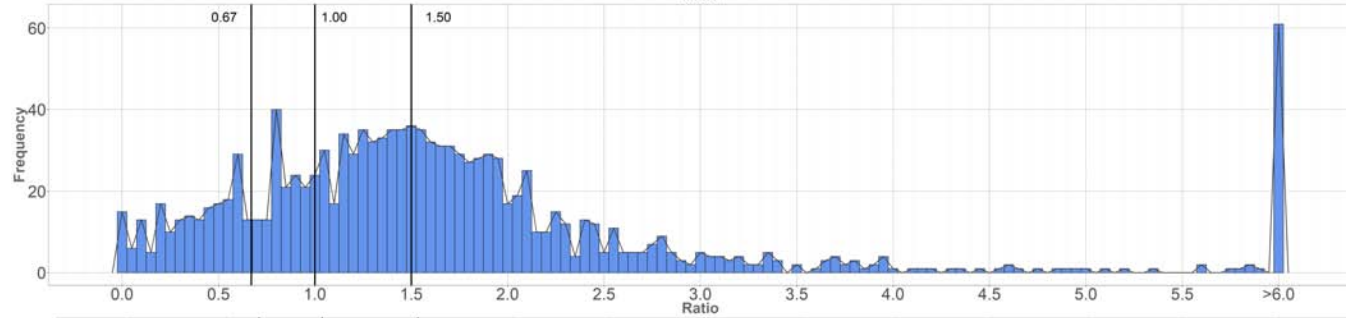

Targeted *trans* genes

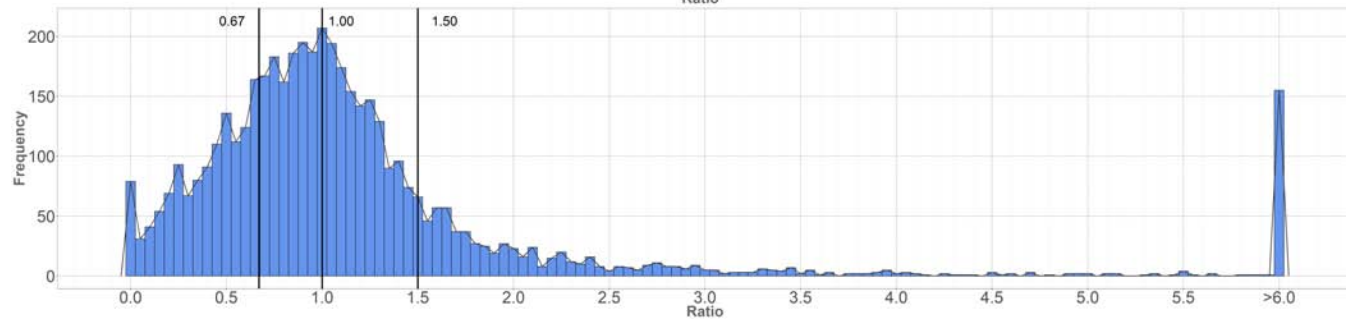

# Triploid

Known transcription factors

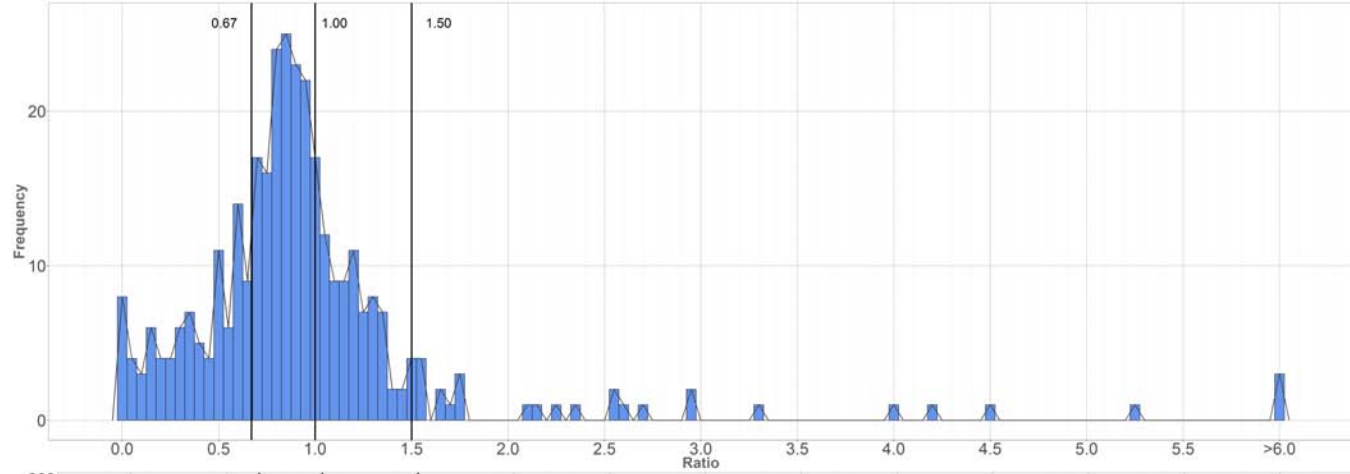

Targeted genes

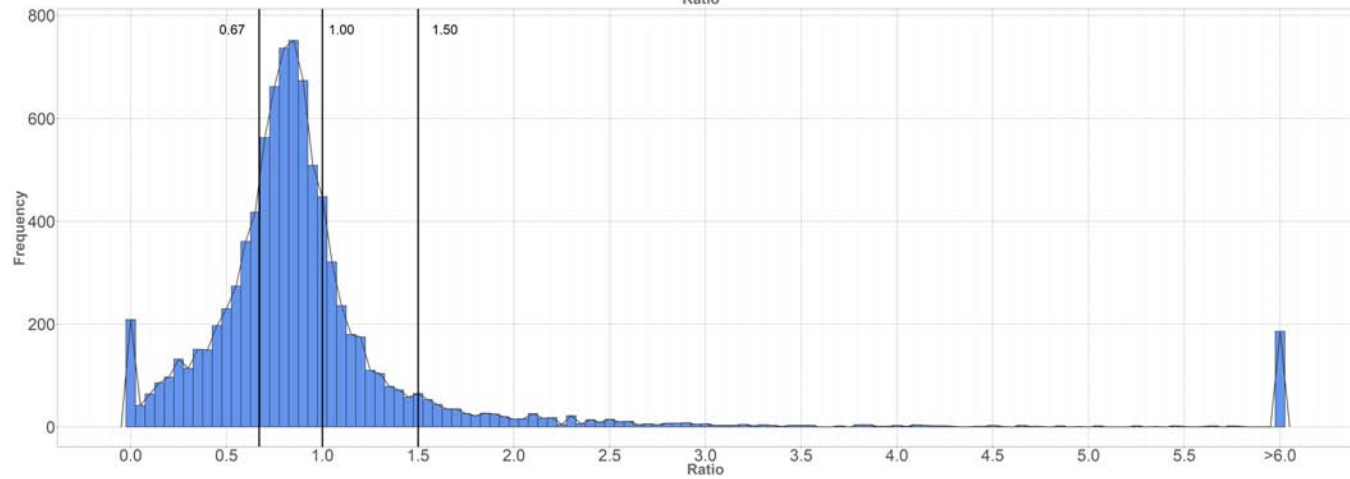



# Tetraploid

Known transcription factors

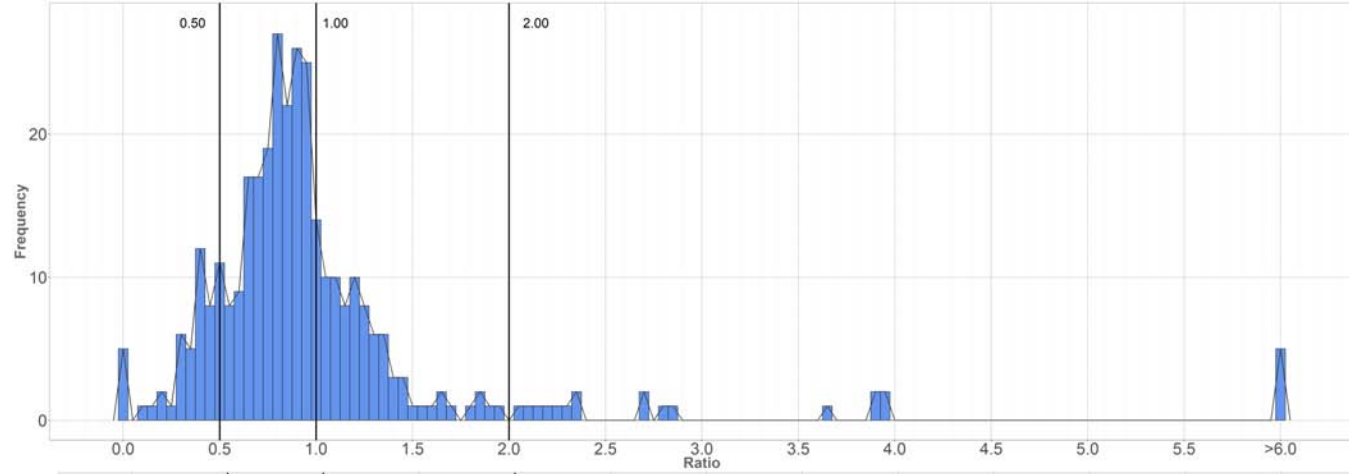

Targeted genes

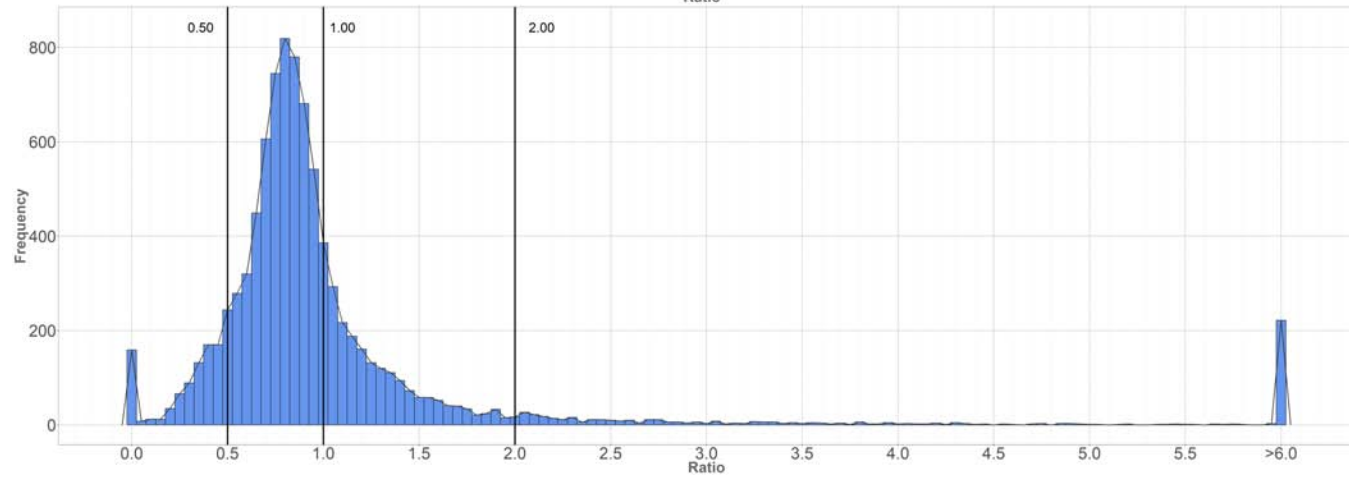

*Cis* transcription factors

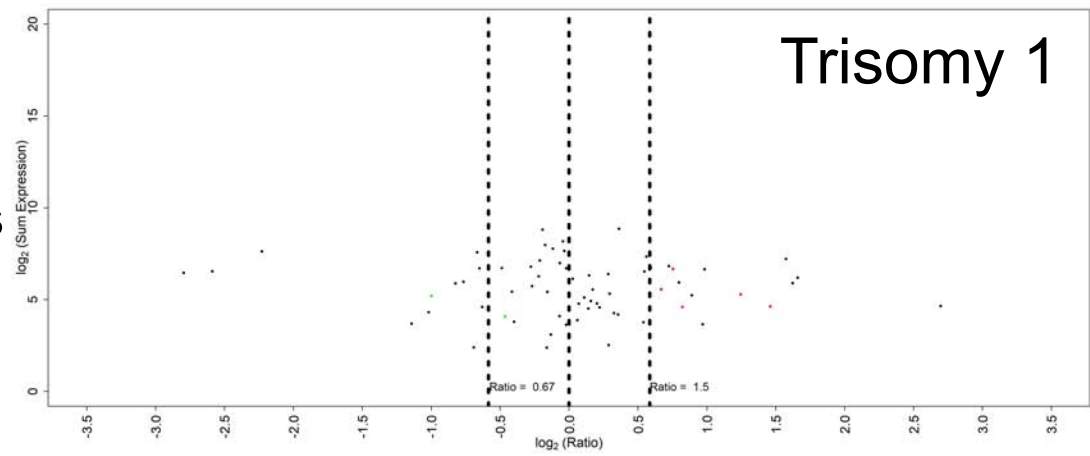

Targeted *cis* genes

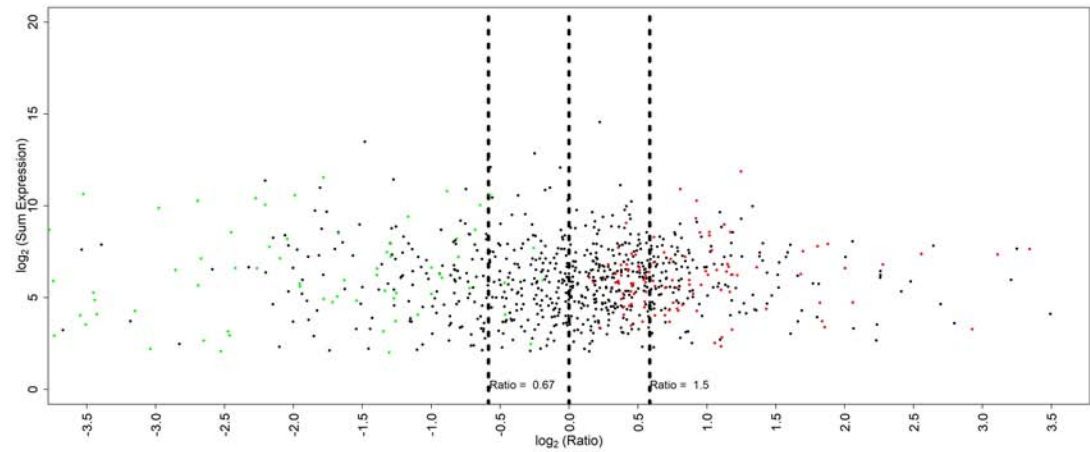

Targeted *trans* genes

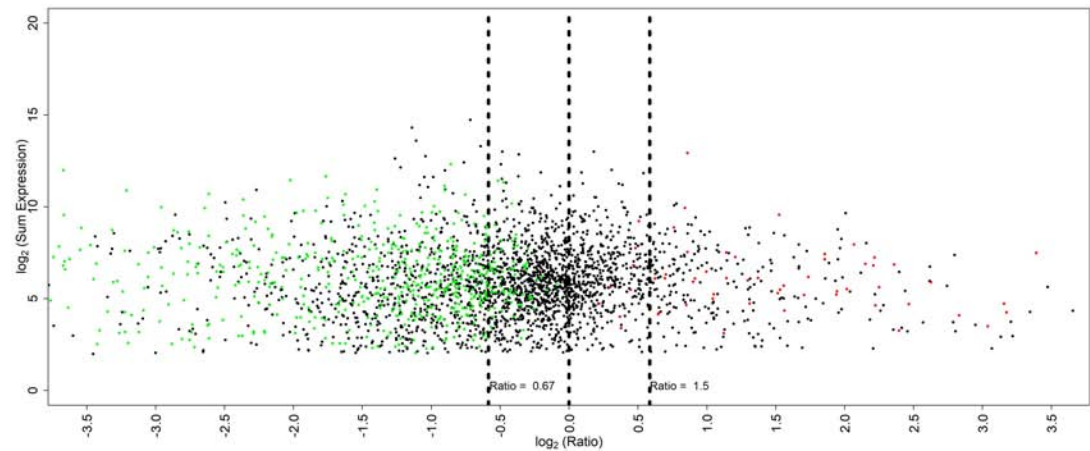

*Cis* transcription factors

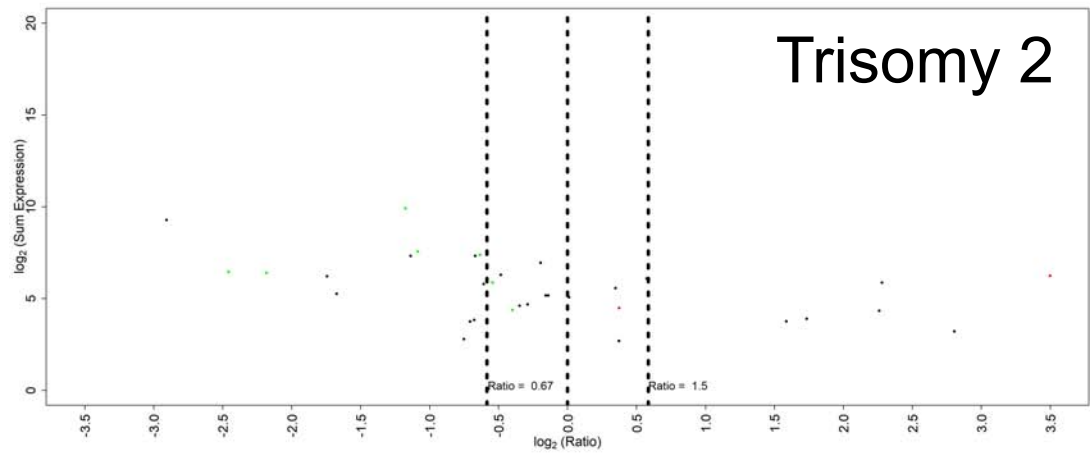

Targeted *cis* genes

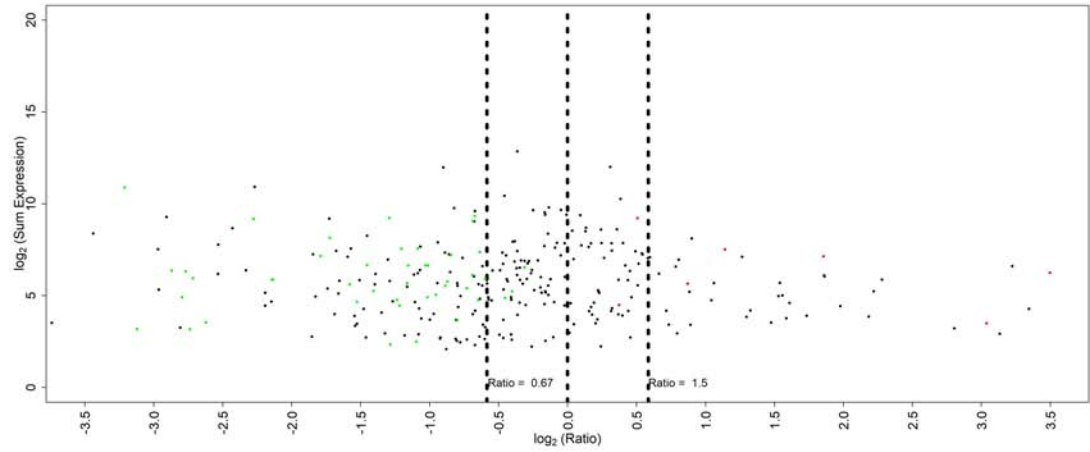

Targeted *trans* genes

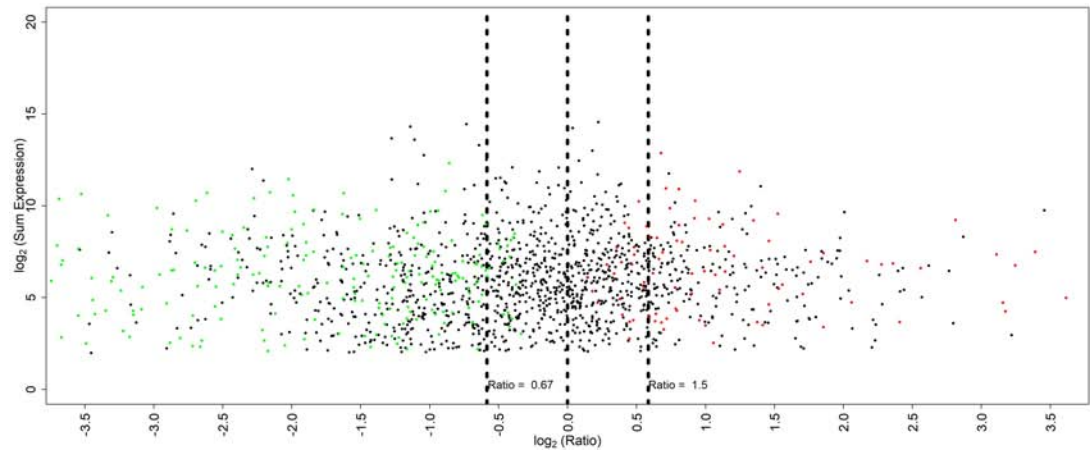

*Cis* transcription factors

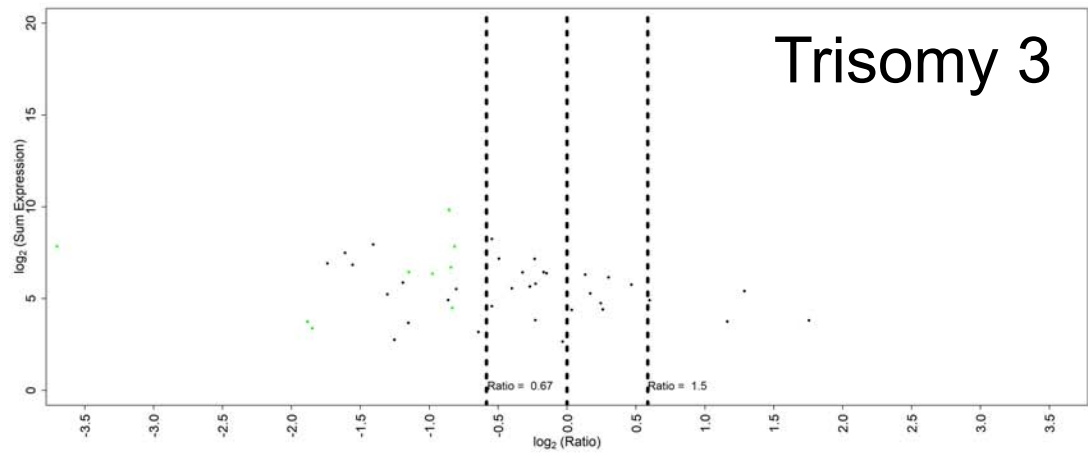

Targeted *cis* genes

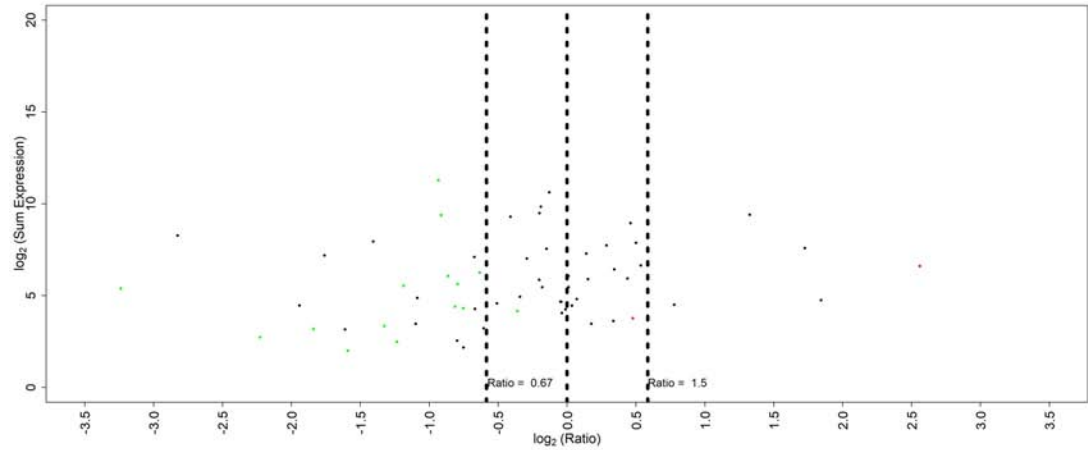

Targeted *trans* genes

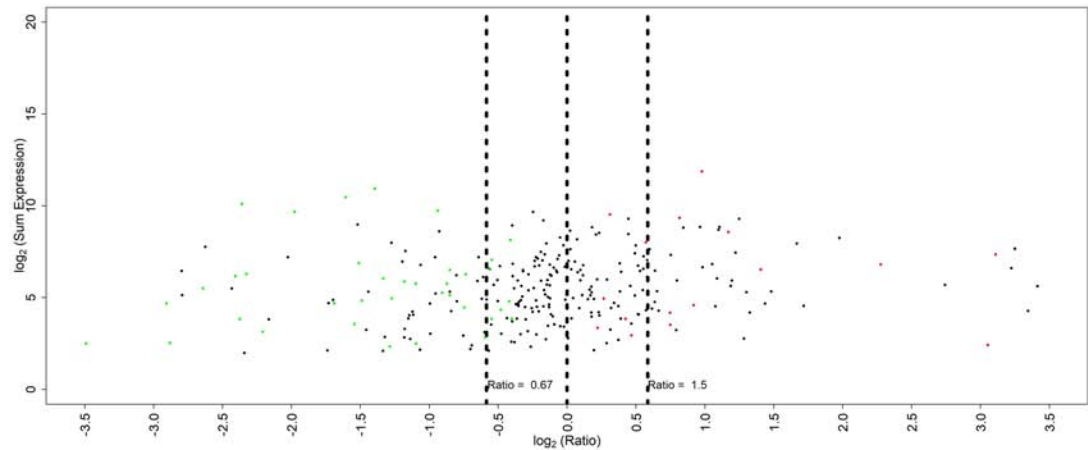

*Cis* transcription factors

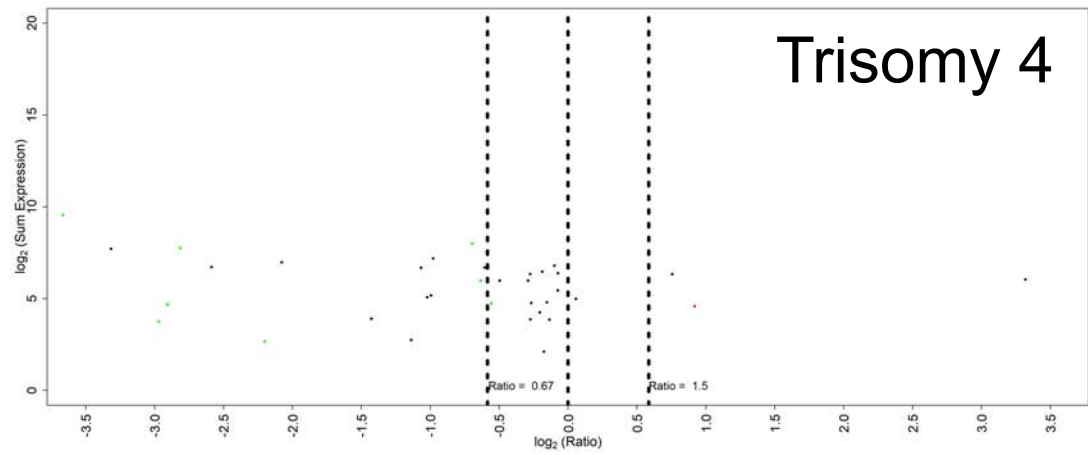

Targeted *cis* genes

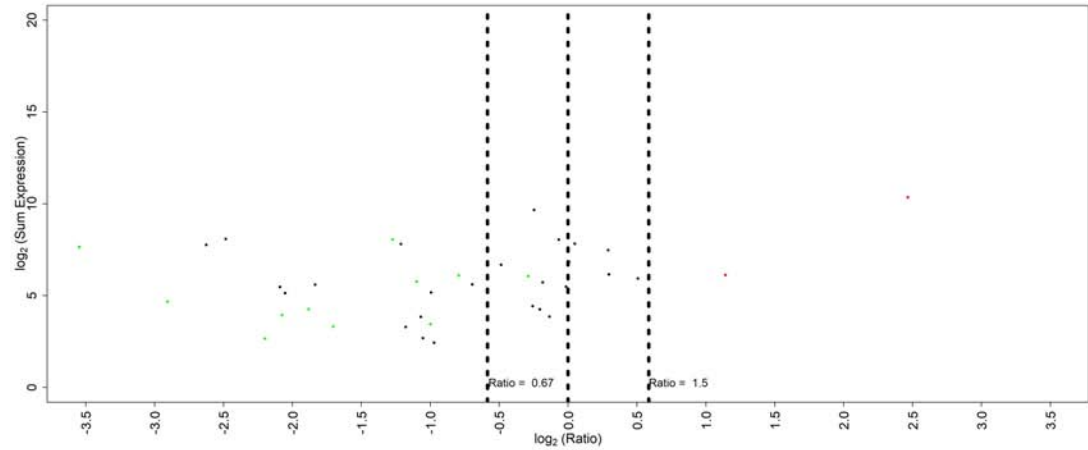

Targeted *trans* genes

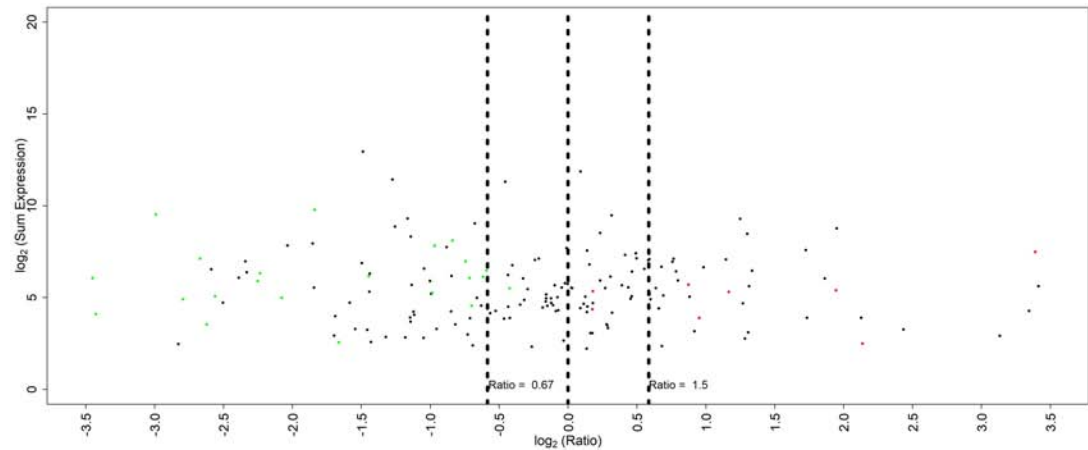

*Cis* transcription factors

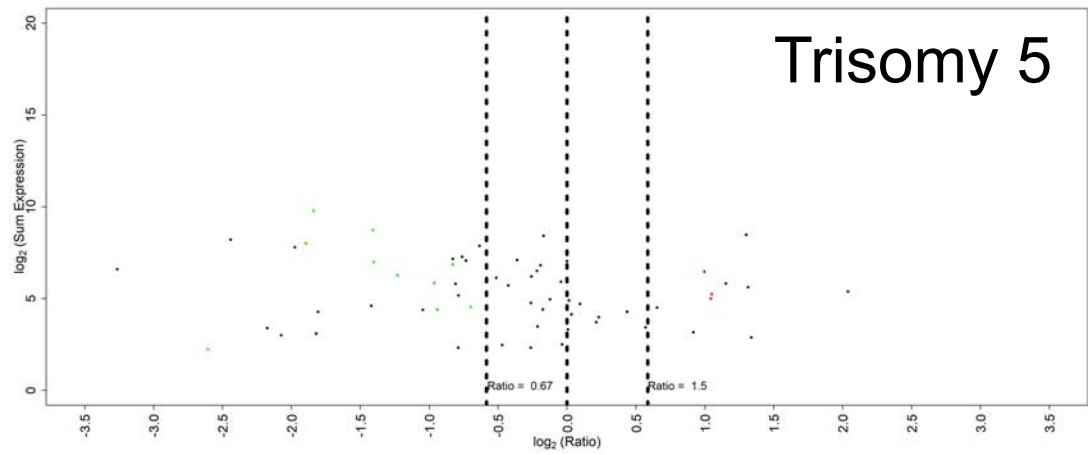

Targeted *cis* genes

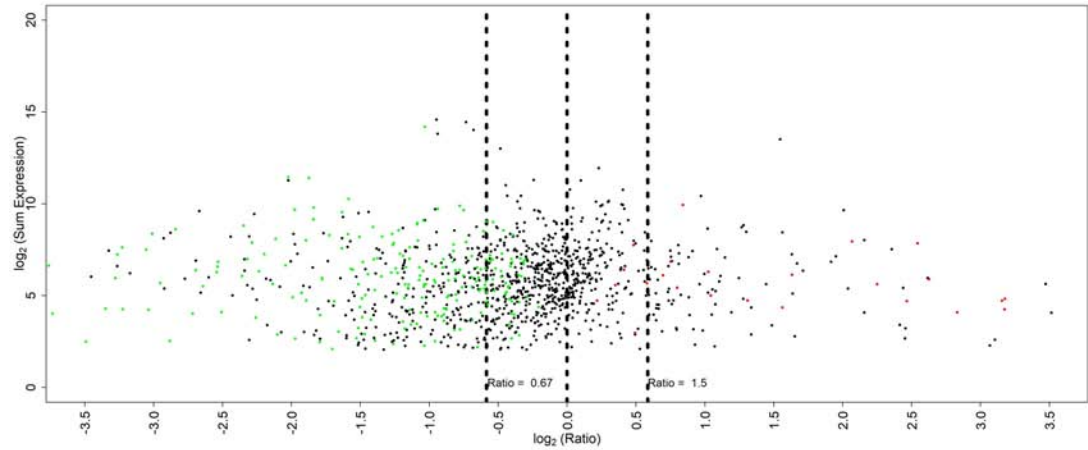

Targeted *trans* genes

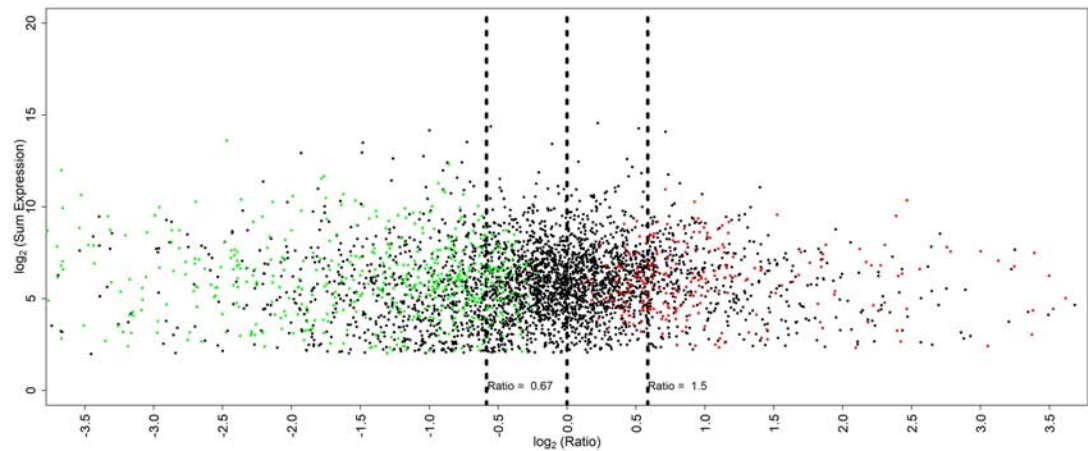

*Trans* affected  
transcription factors

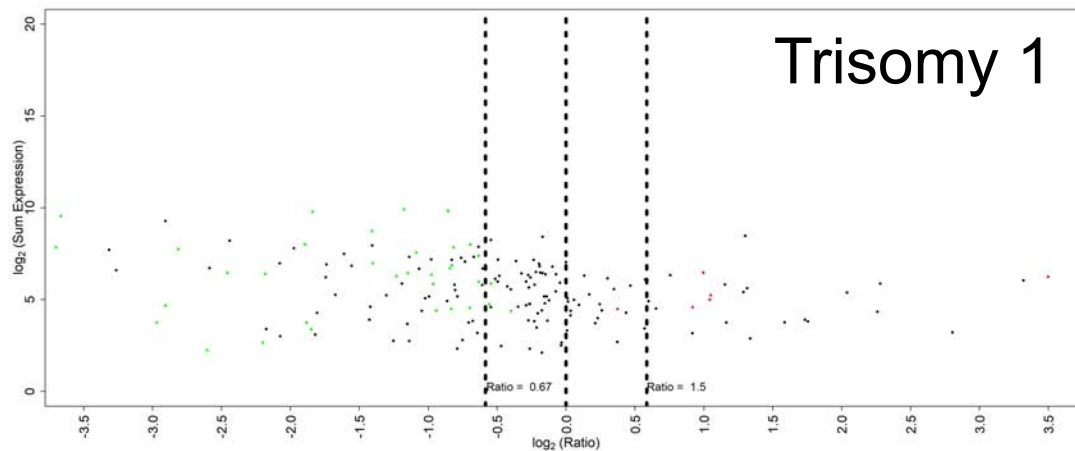

Targeted *cis* genes

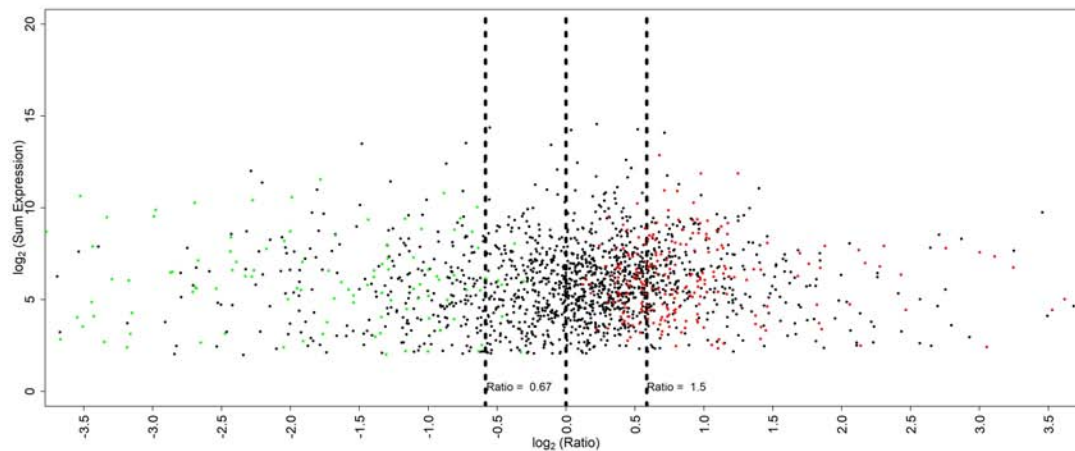

Targeted *trans* genes

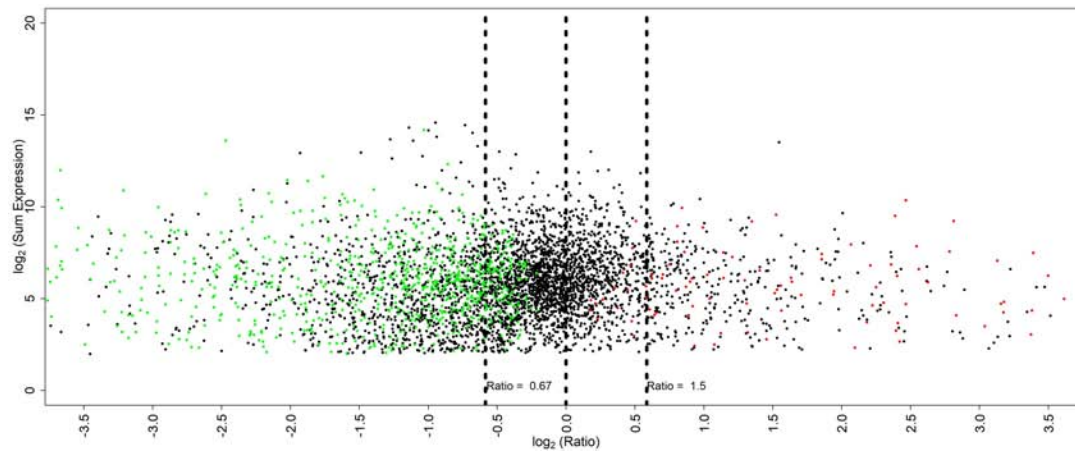

*Trans* affected  
transcription factors

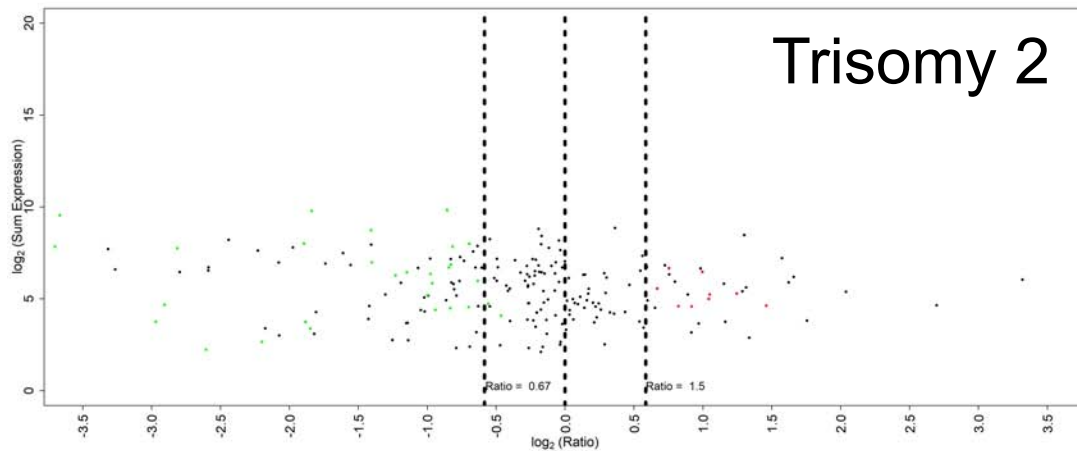

Targeted *cis* genes

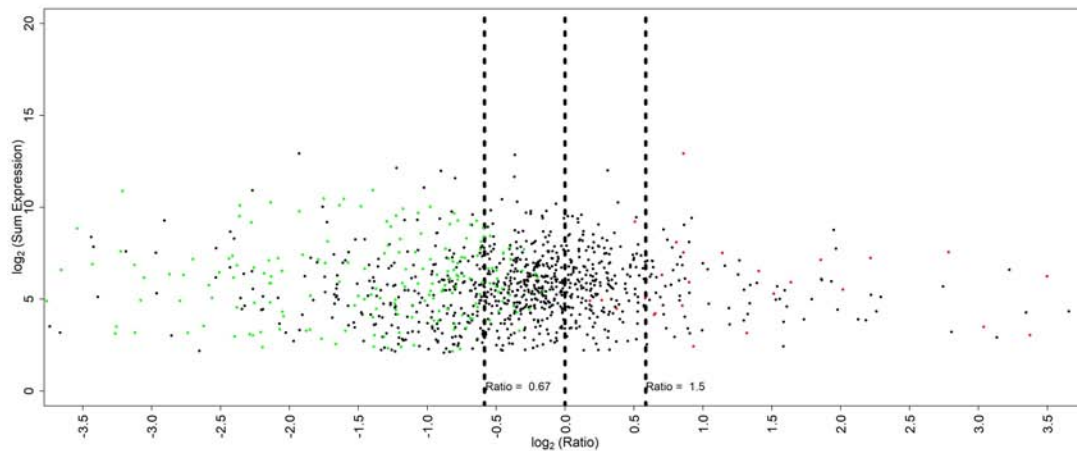

Targeted *trans* genes

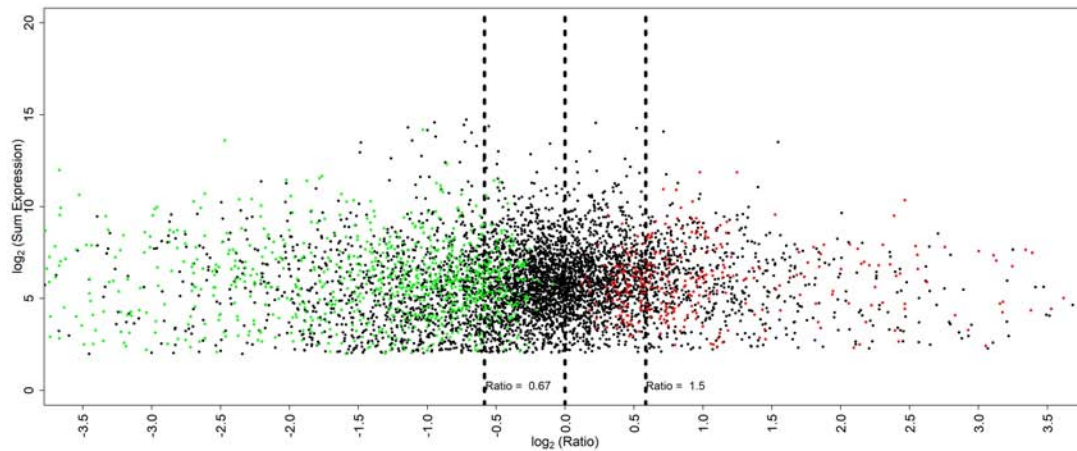



*Trans* affected  
transcription factors

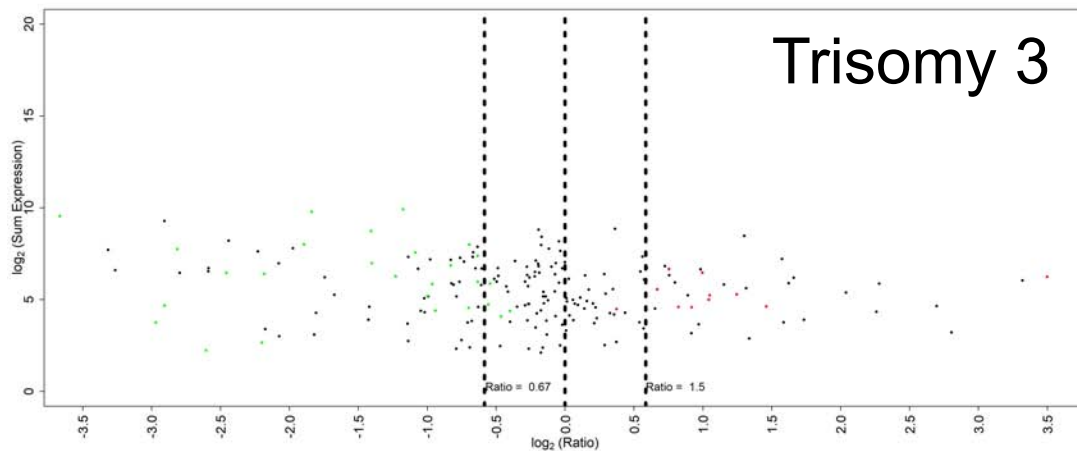

Targeted *cis* genes

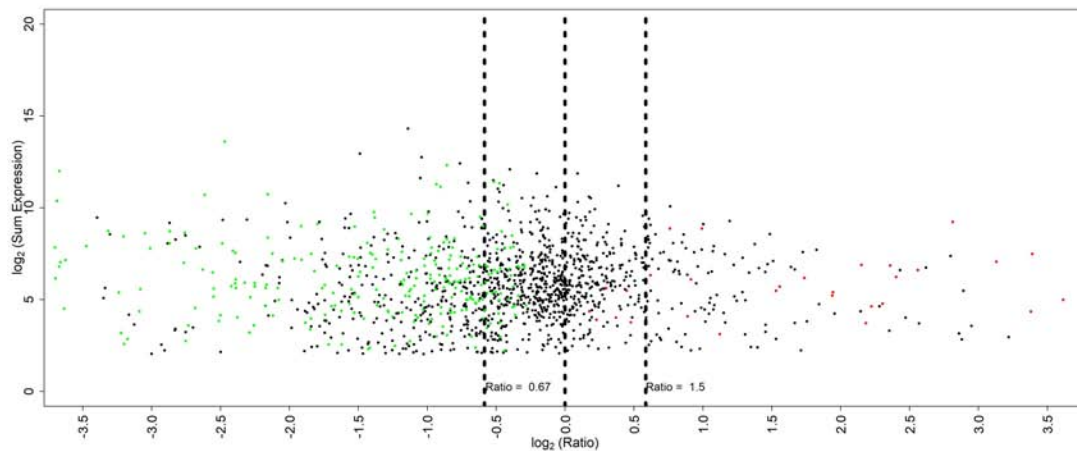

Targeted *trans* genes

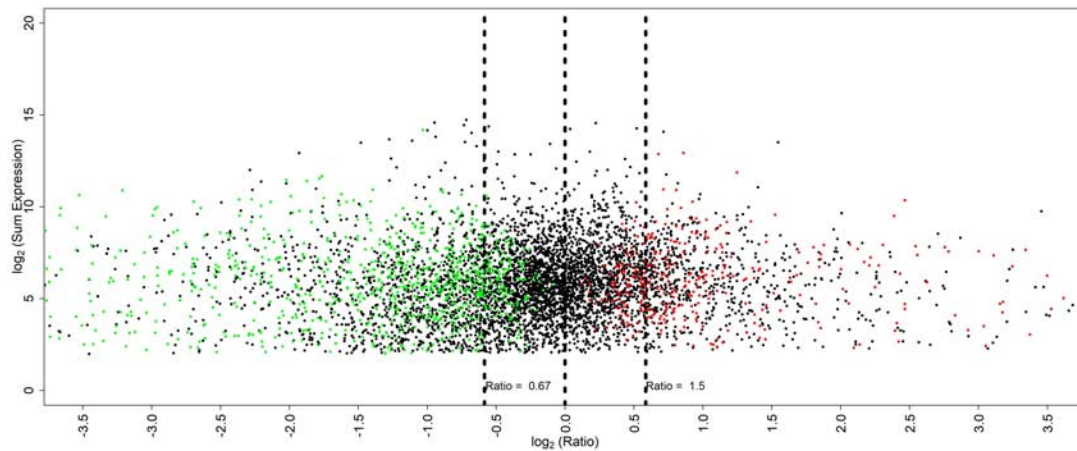

*Trans* affected  
transcription factors

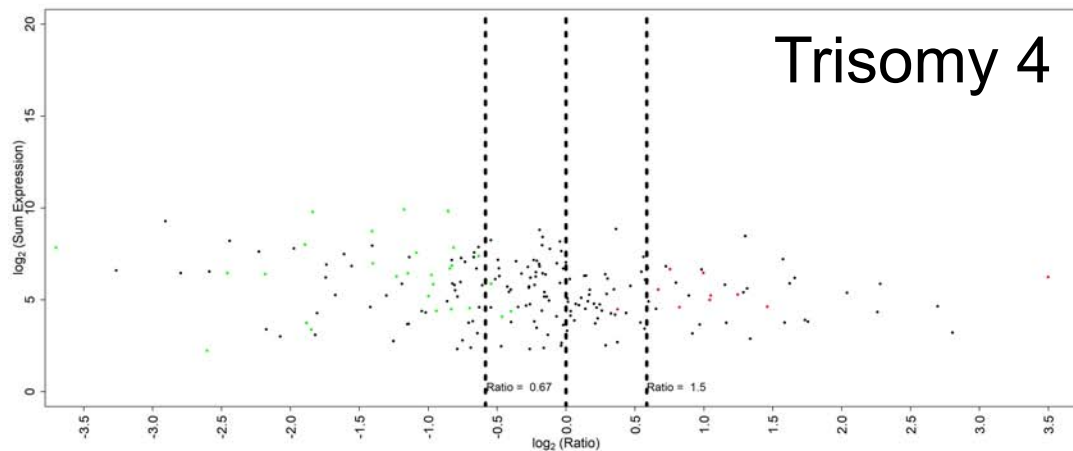

Targeted *cis* genes

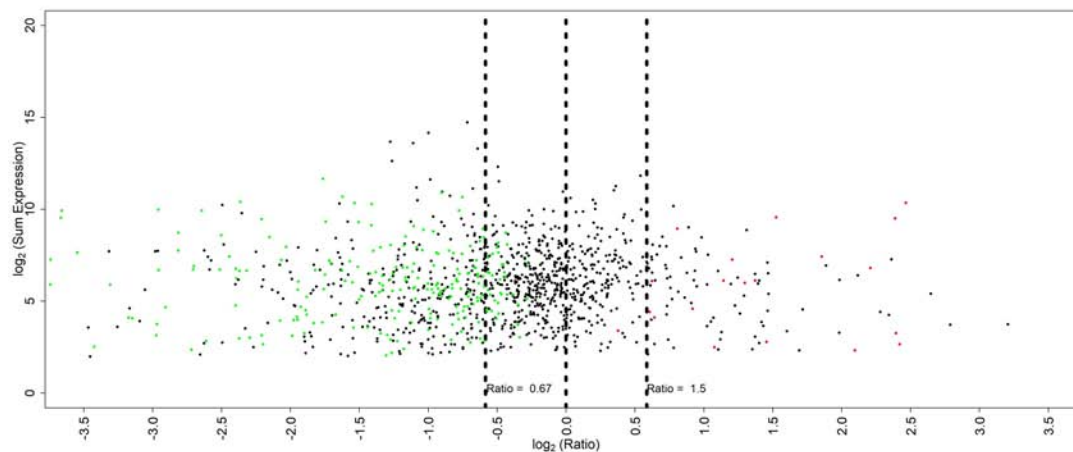

Targeted *trans* genes

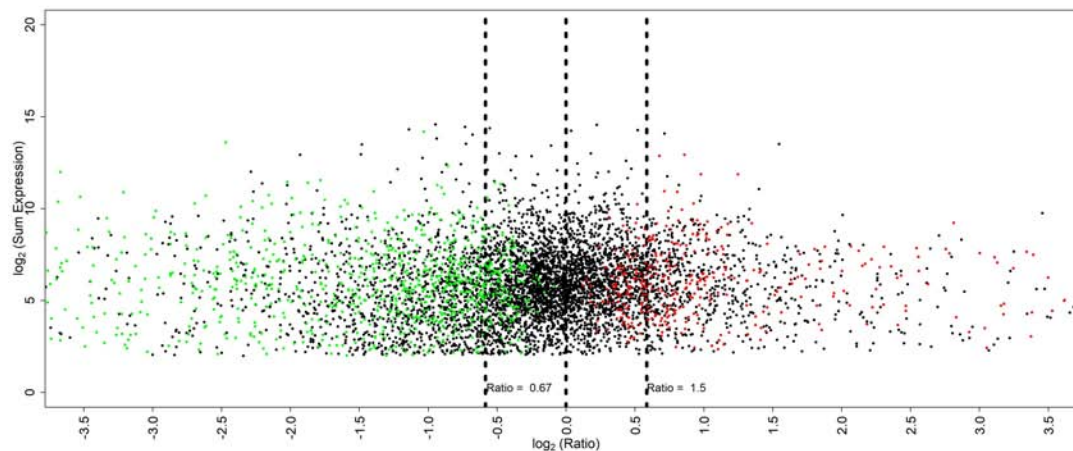

*Trans* affected  
transcription factors

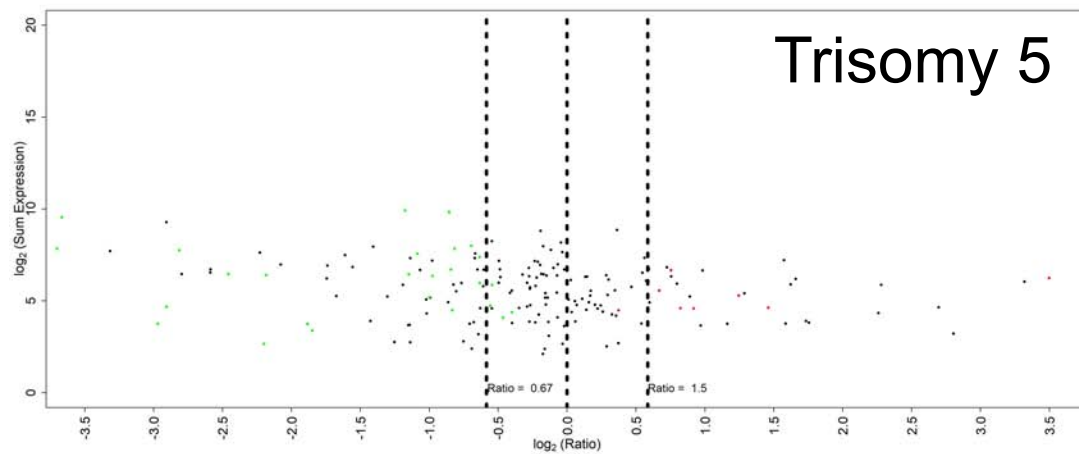

Targeted *cis* genes

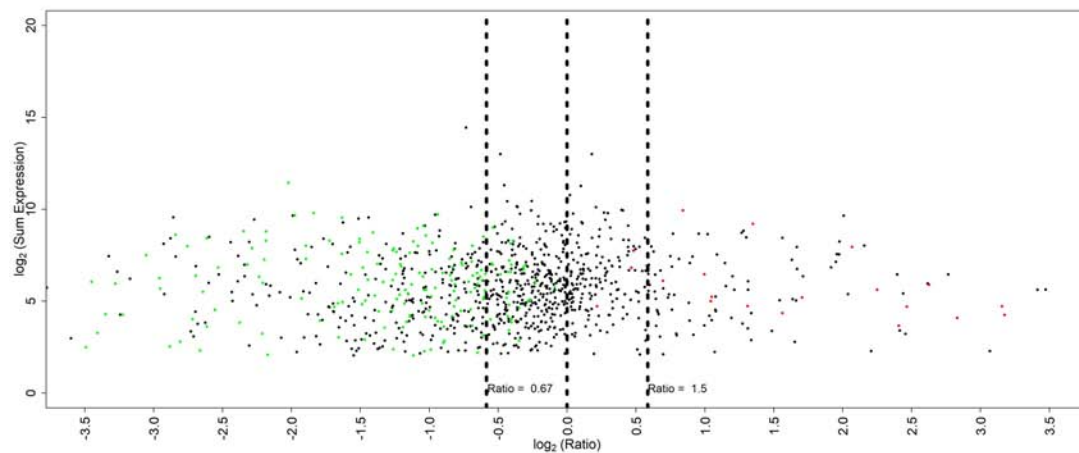

Targeted *trans* genes

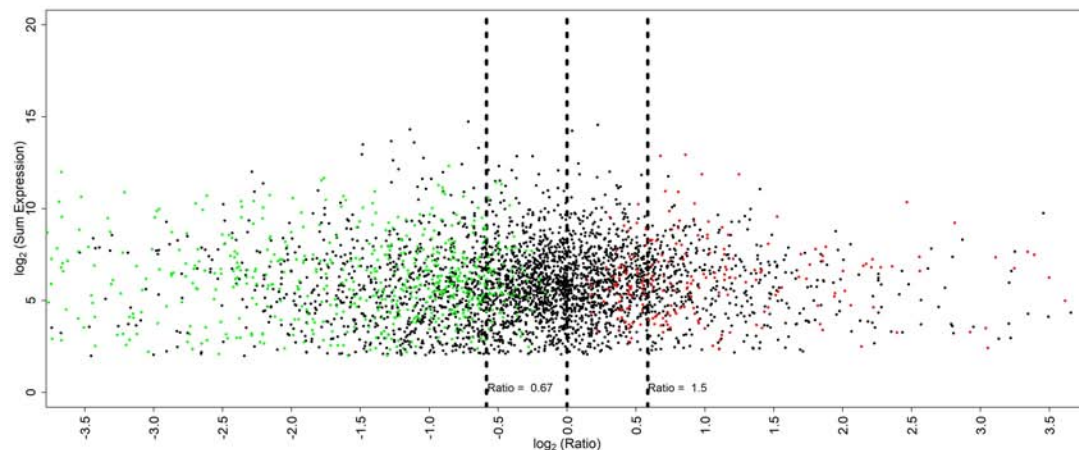

Known transcription factors

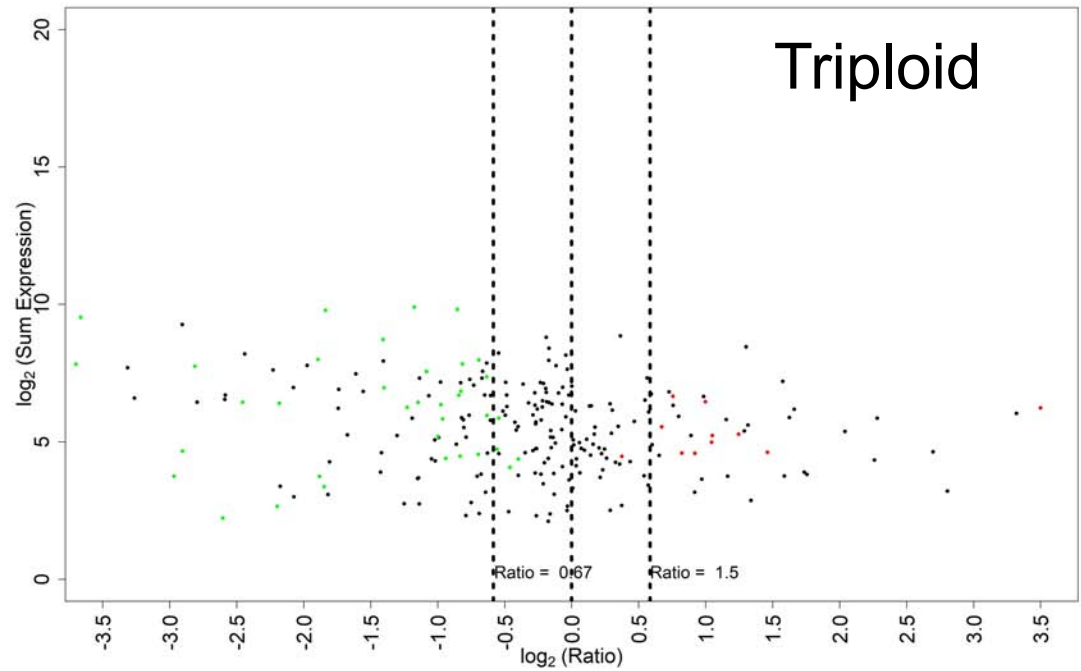

Targeted genes

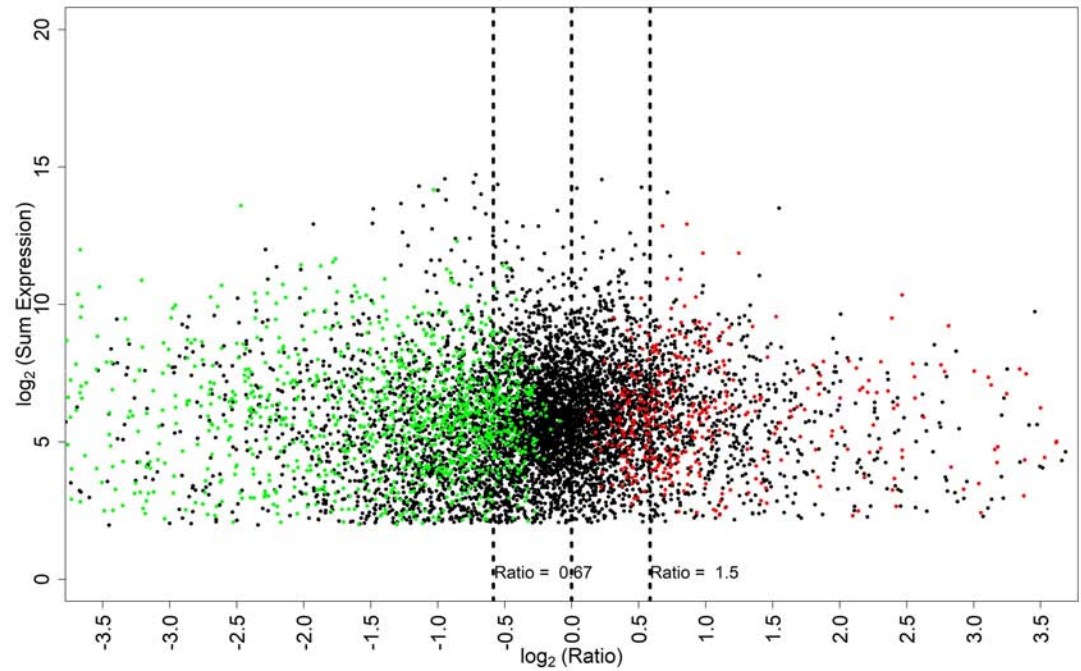

Known transcription factors

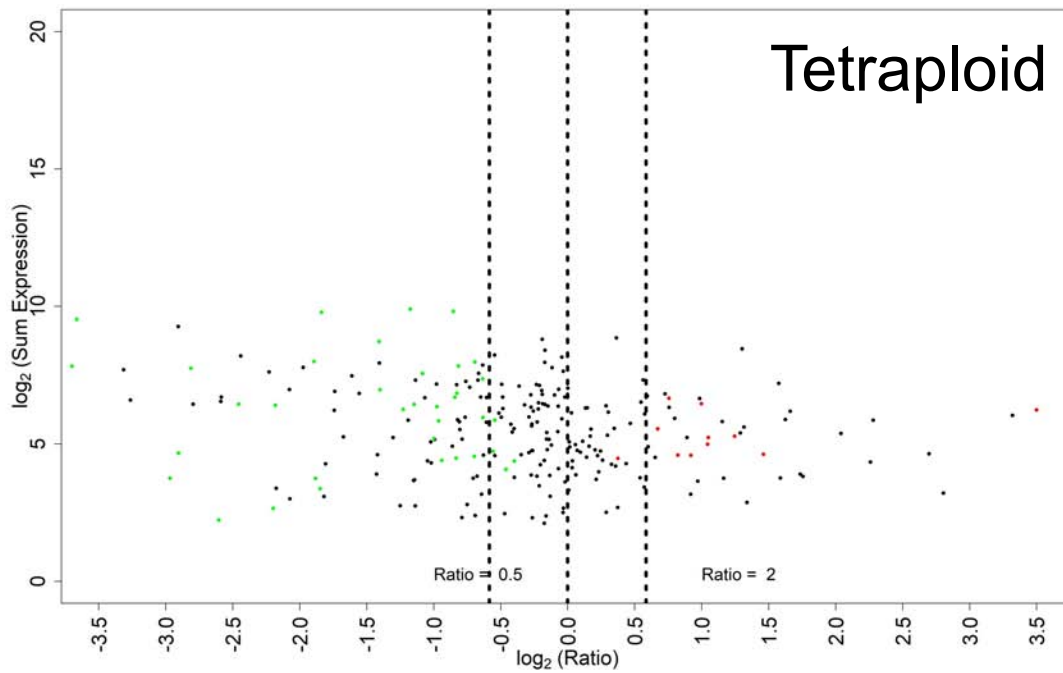

Targeted genes

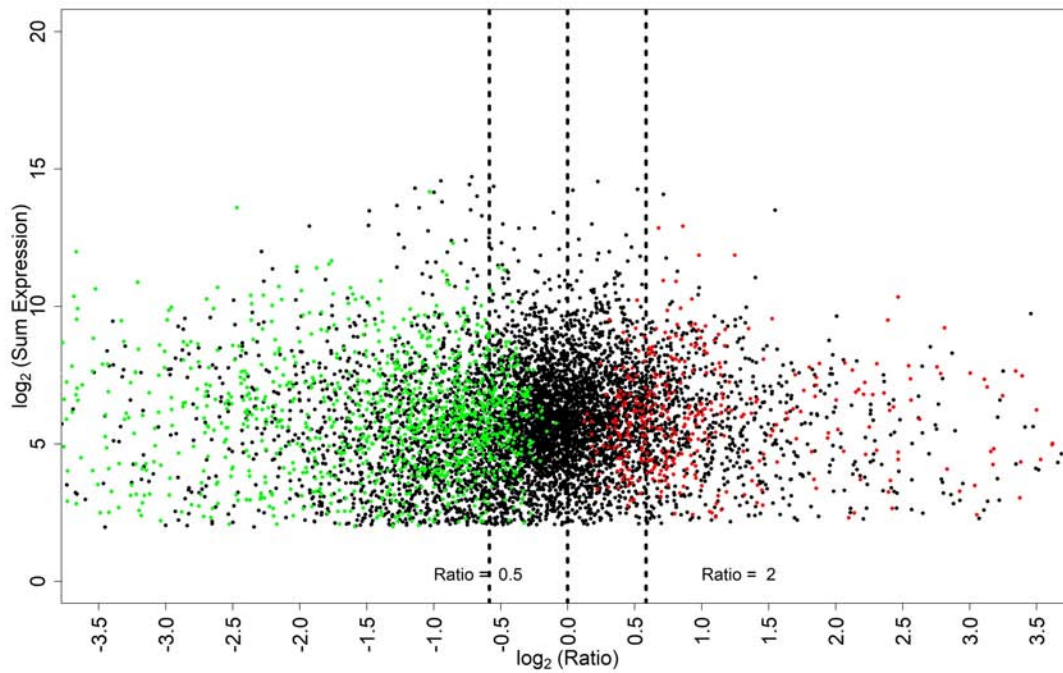

Fig. S16. Ratio distributions for gene expression in yeast disomic haploid versus normal haploid partitioned into cis and trans. Distributions were generated as described in Fig. 1.

# Expression of wild-type biological replicates (All pairs, pooled pair 1 to pair 6)

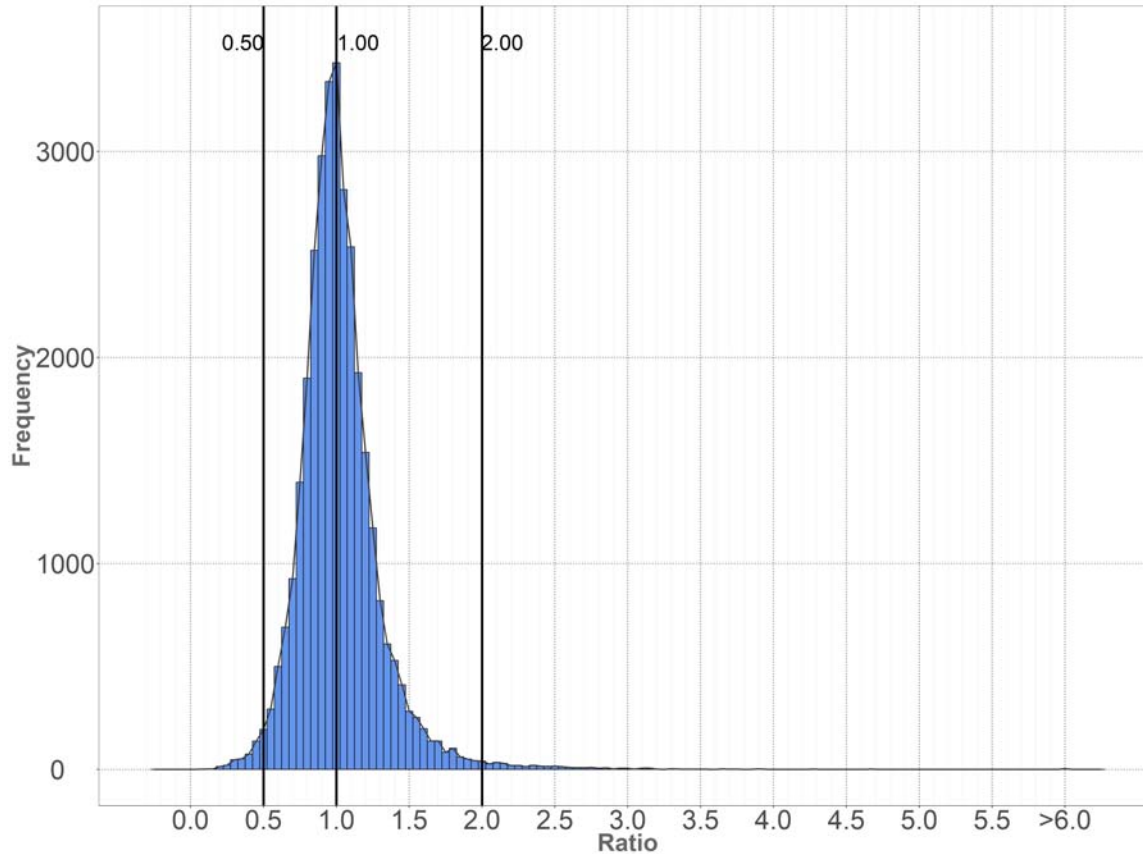

# Expression of wild-type biological replicates (Pair 1 to pair 6)

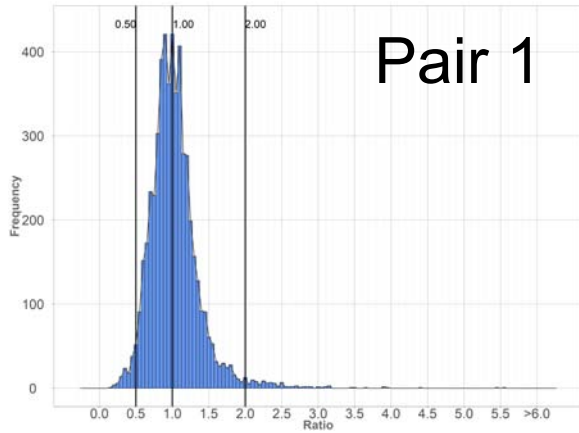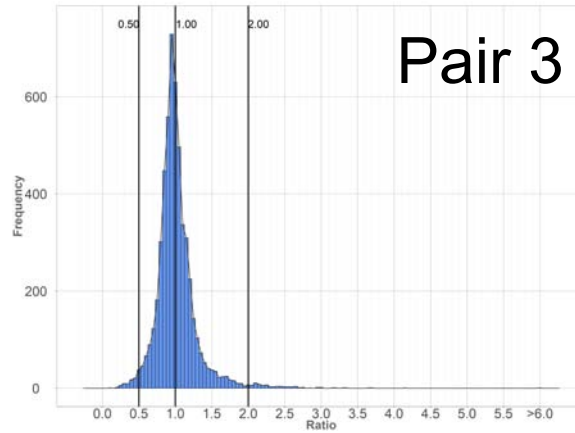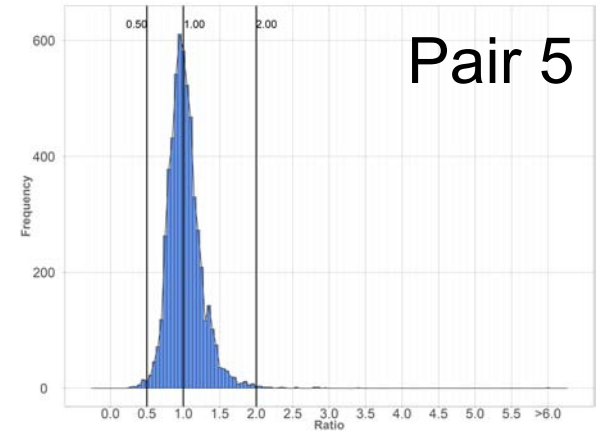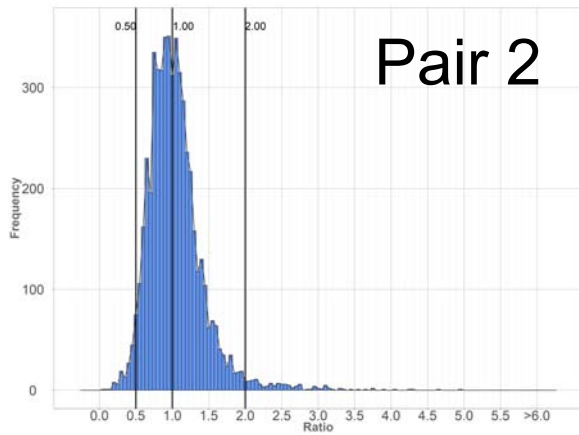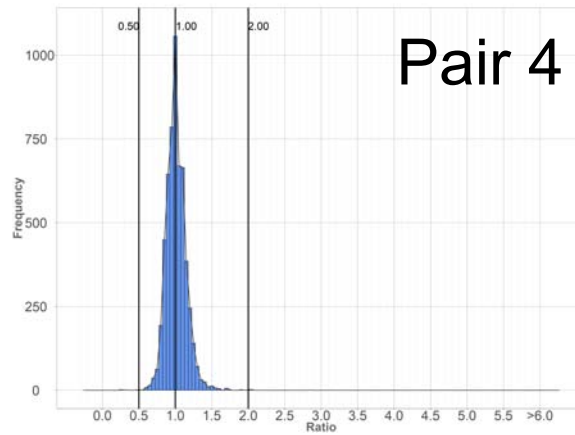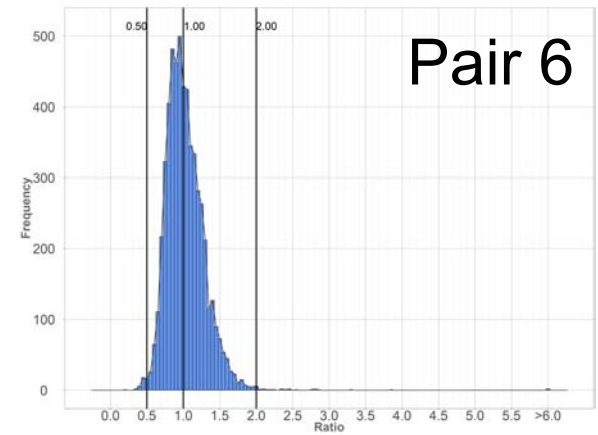



# Disomy I

*cis*

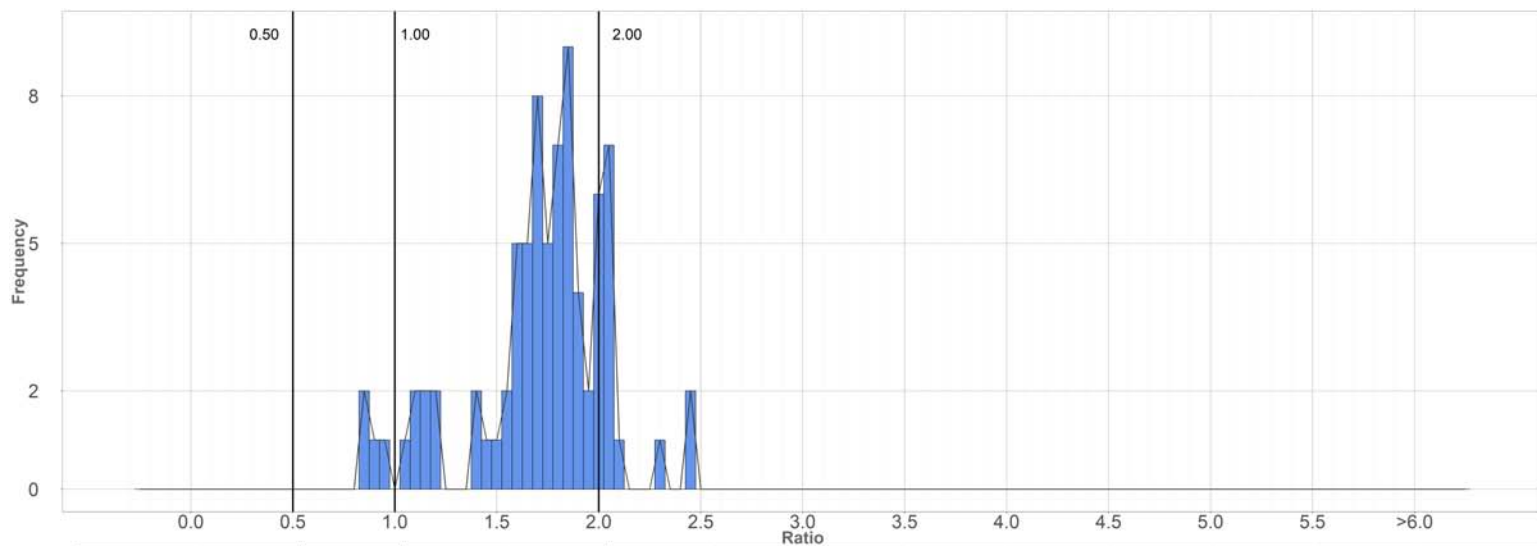

*trans*

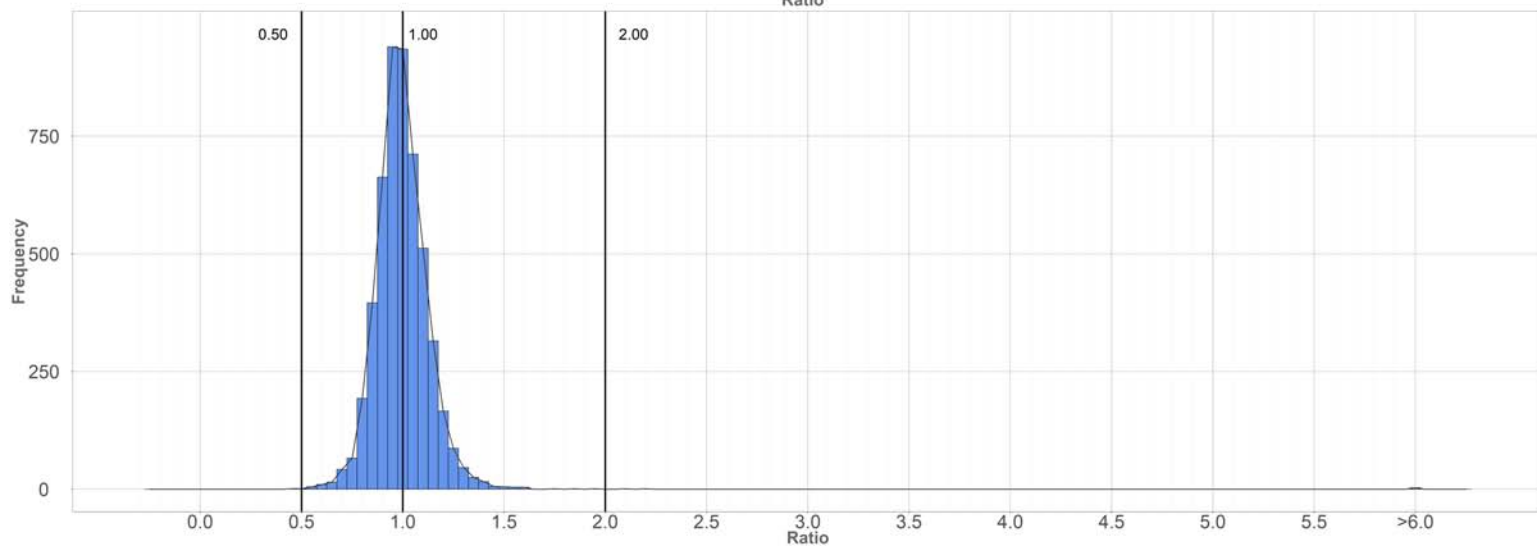

# Disomy II

*cis*

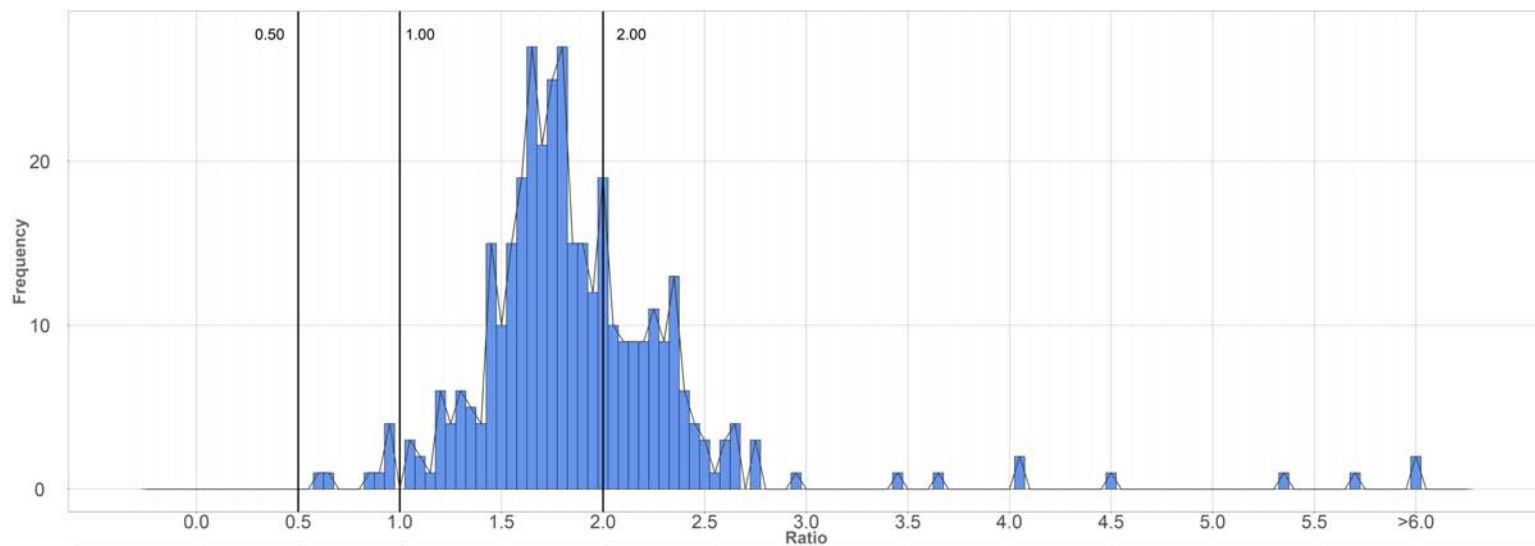

*trans*

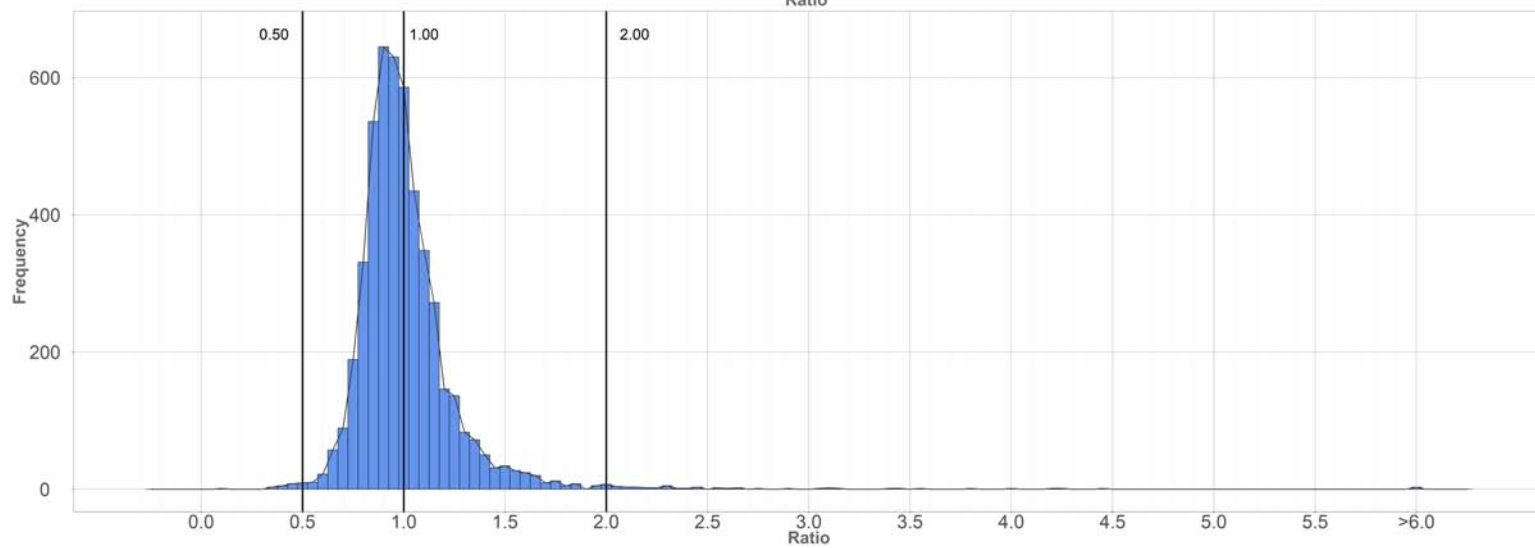

# Disomy IV

*cis*

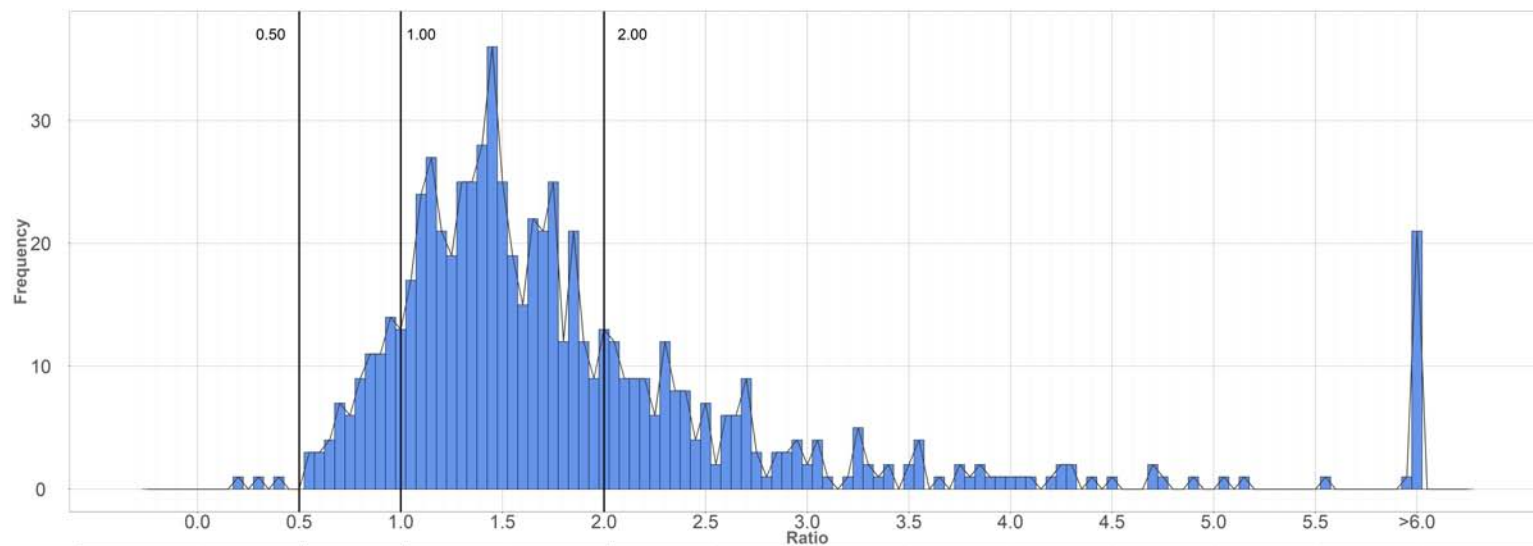

*trans*

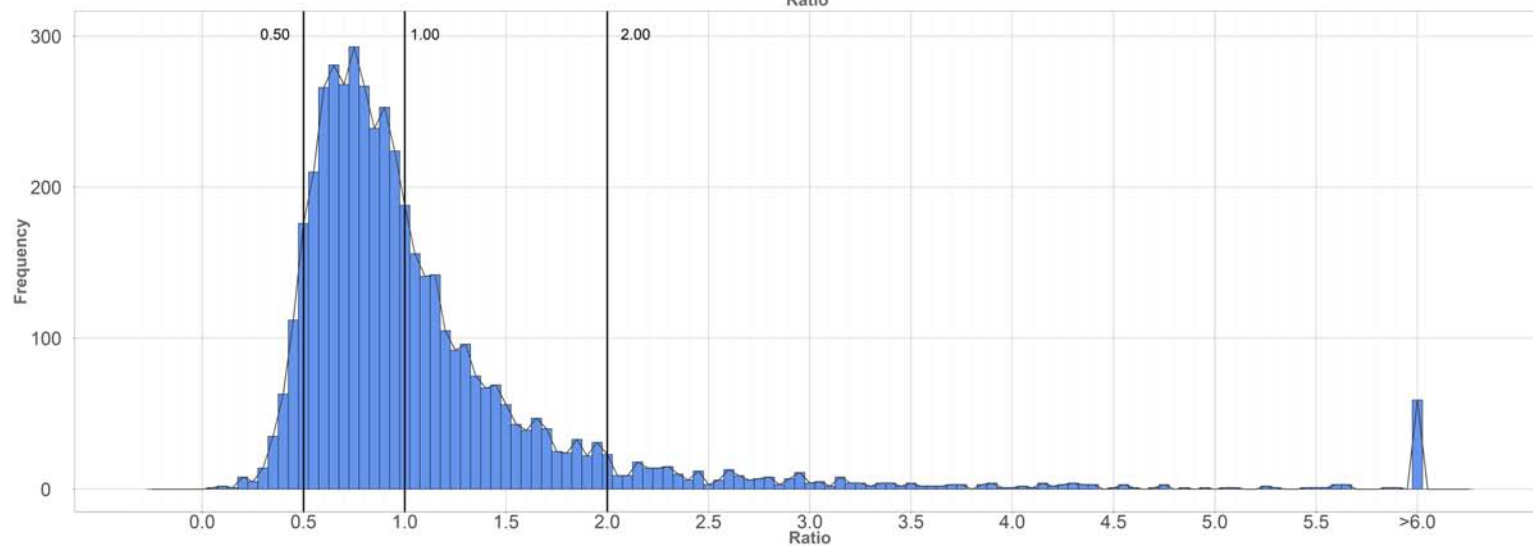

# Disomy V

*cis*

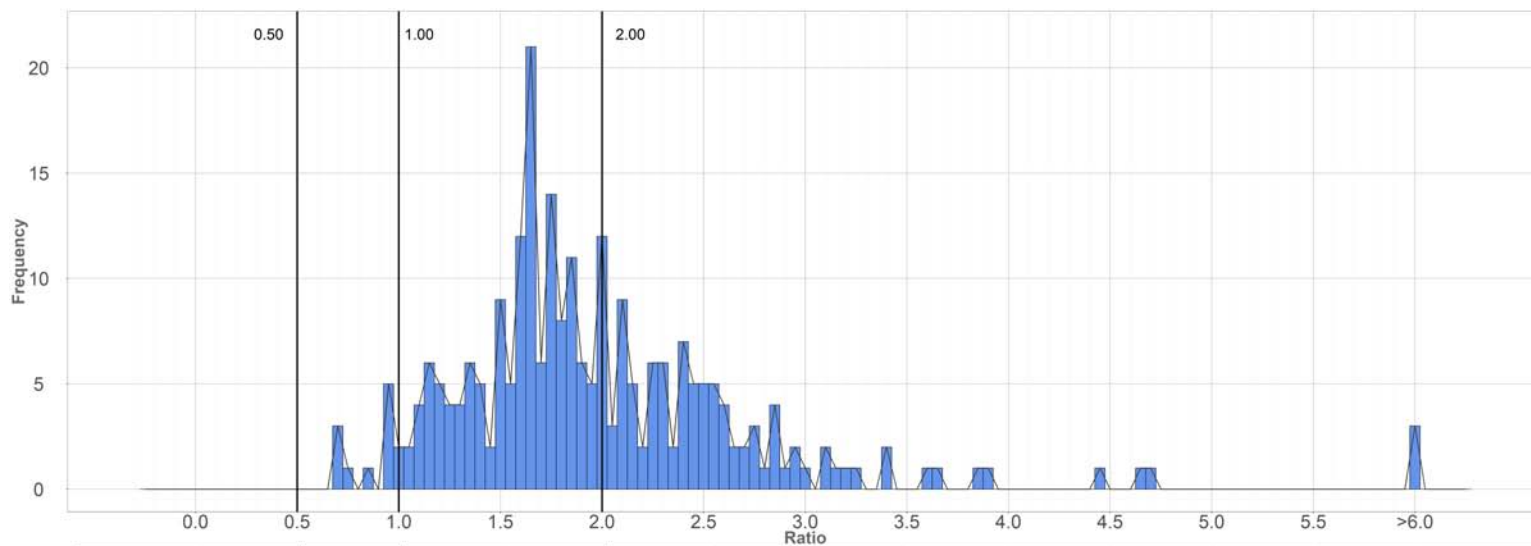

*trans*

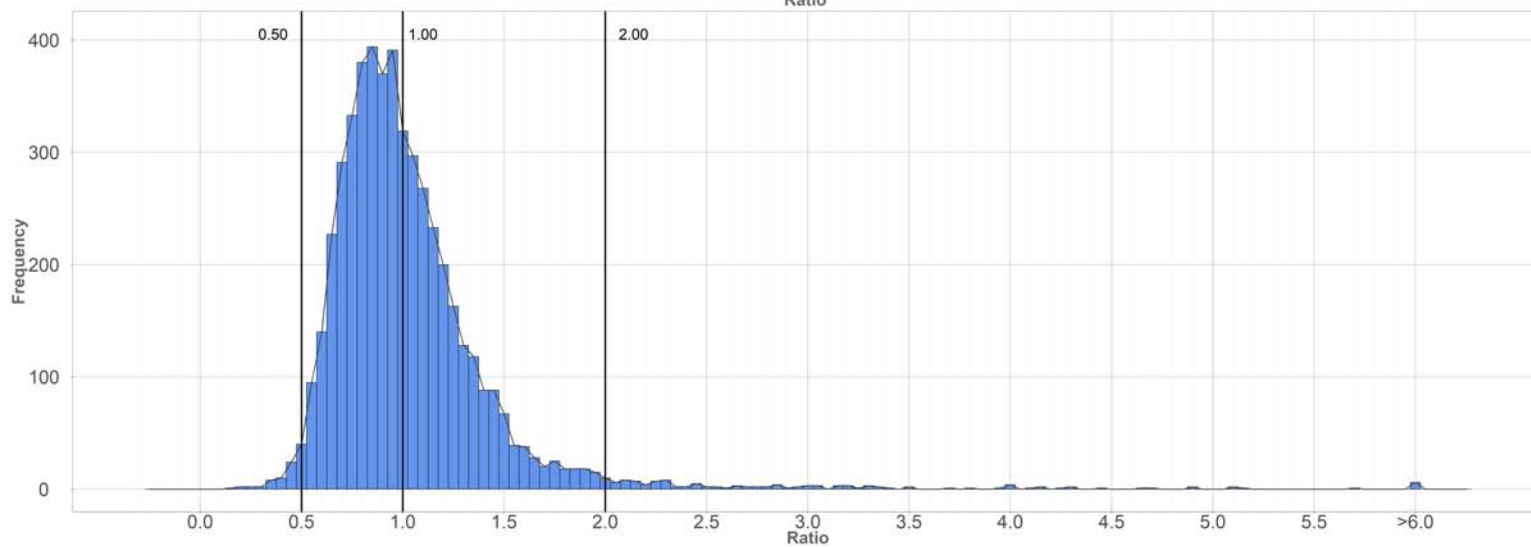

# Disomy VIII

*cis*

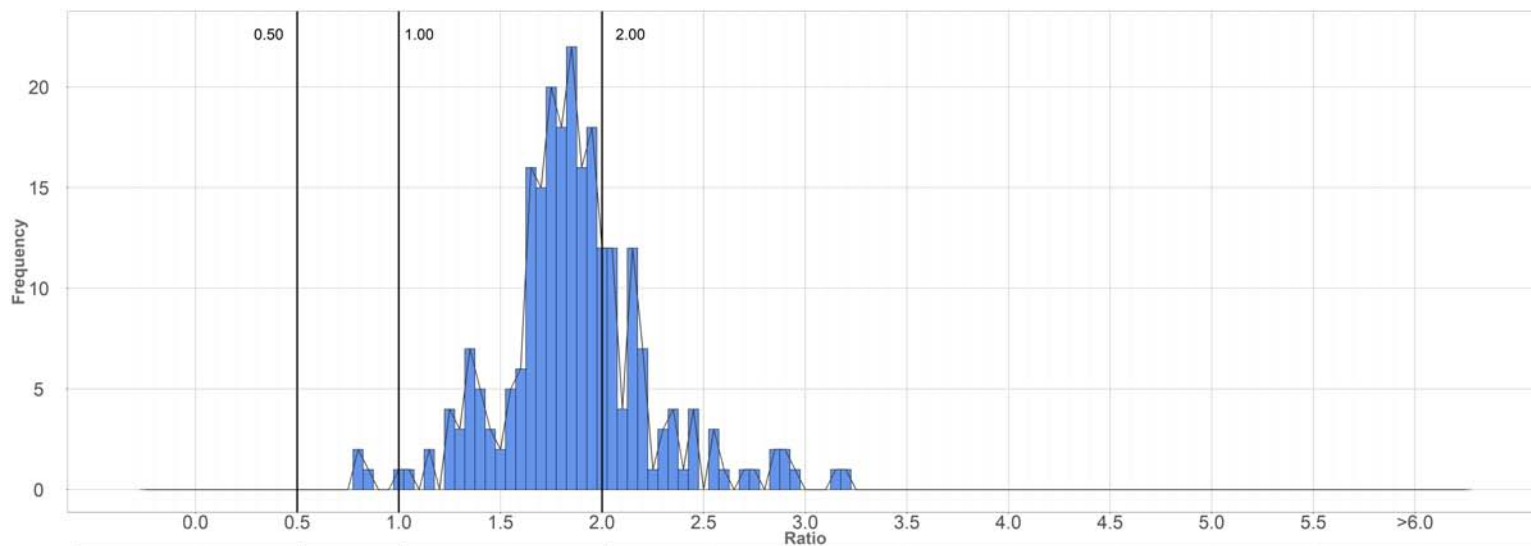

*trans*

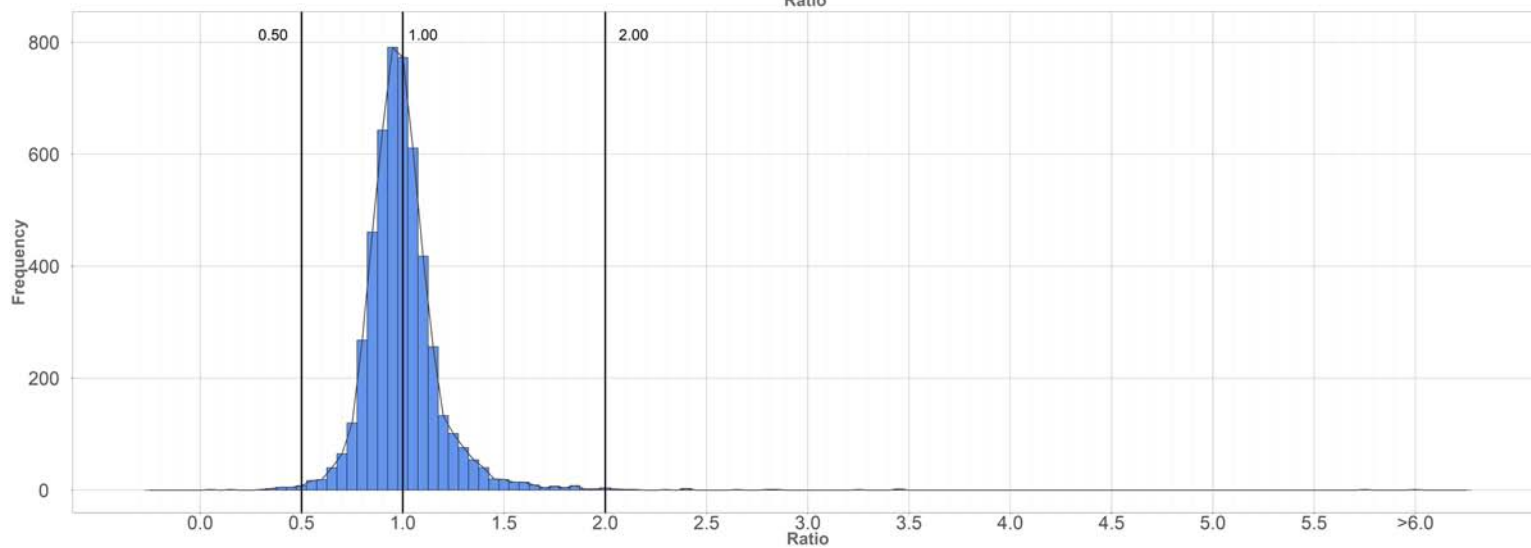

# Disomy IX

*cis*

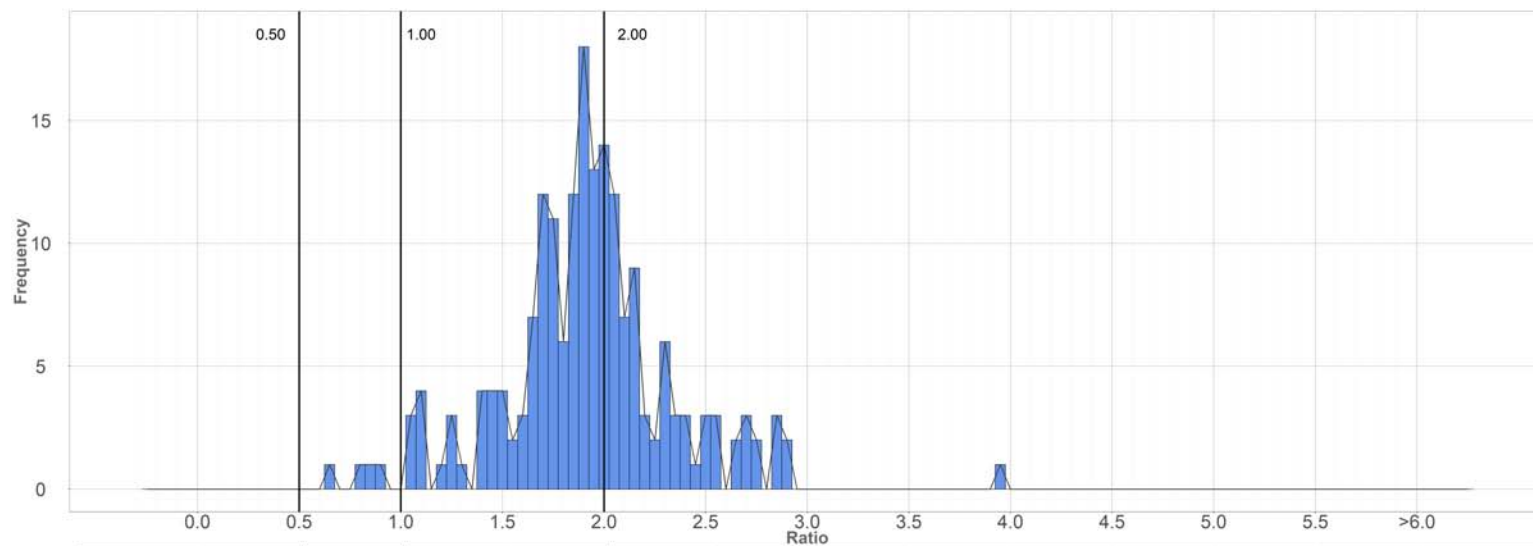

*trans*

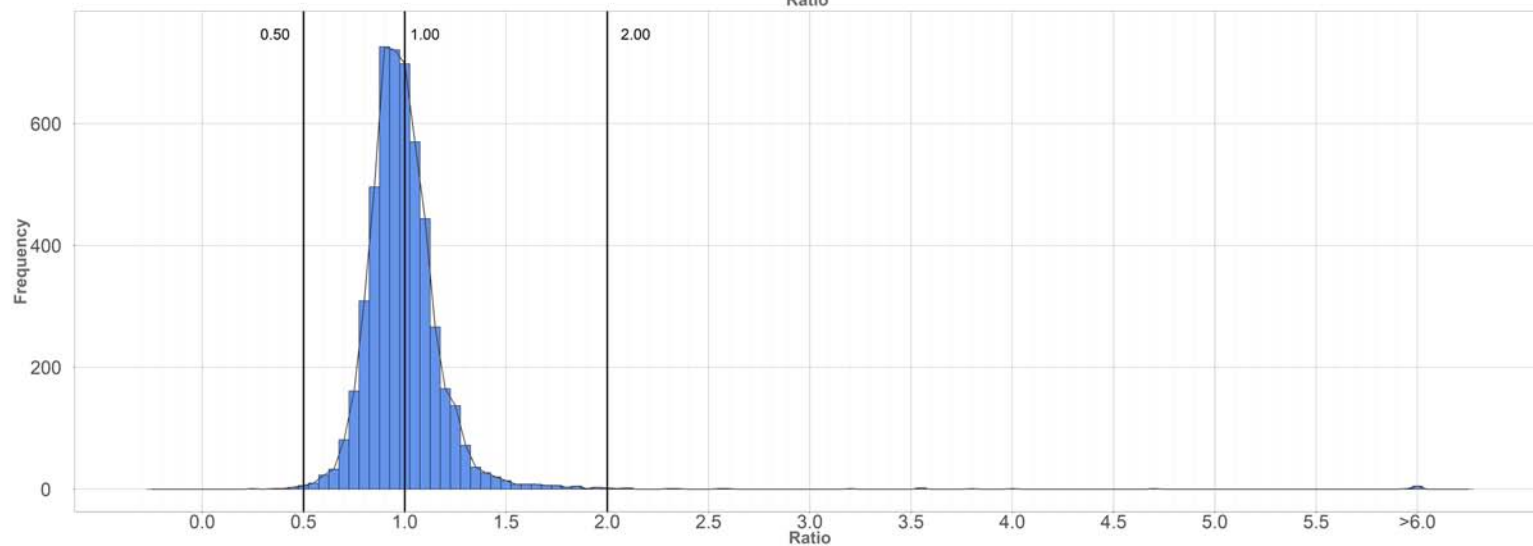

# Disomy X

*cis*

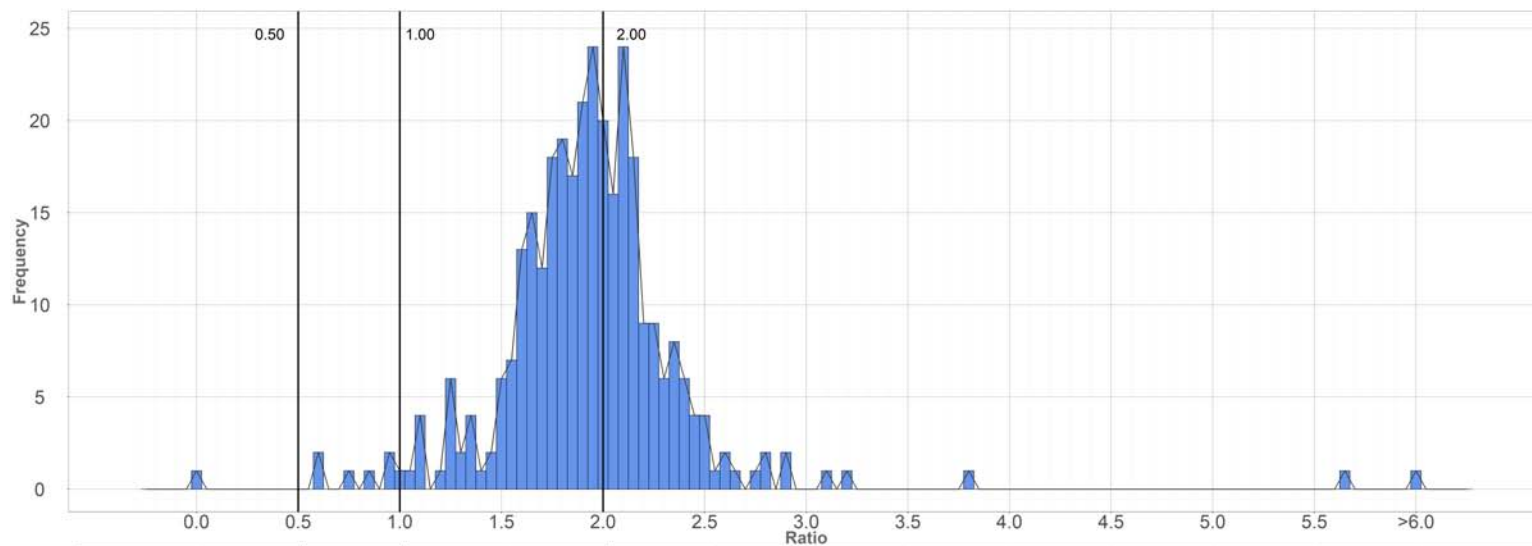

*trans*

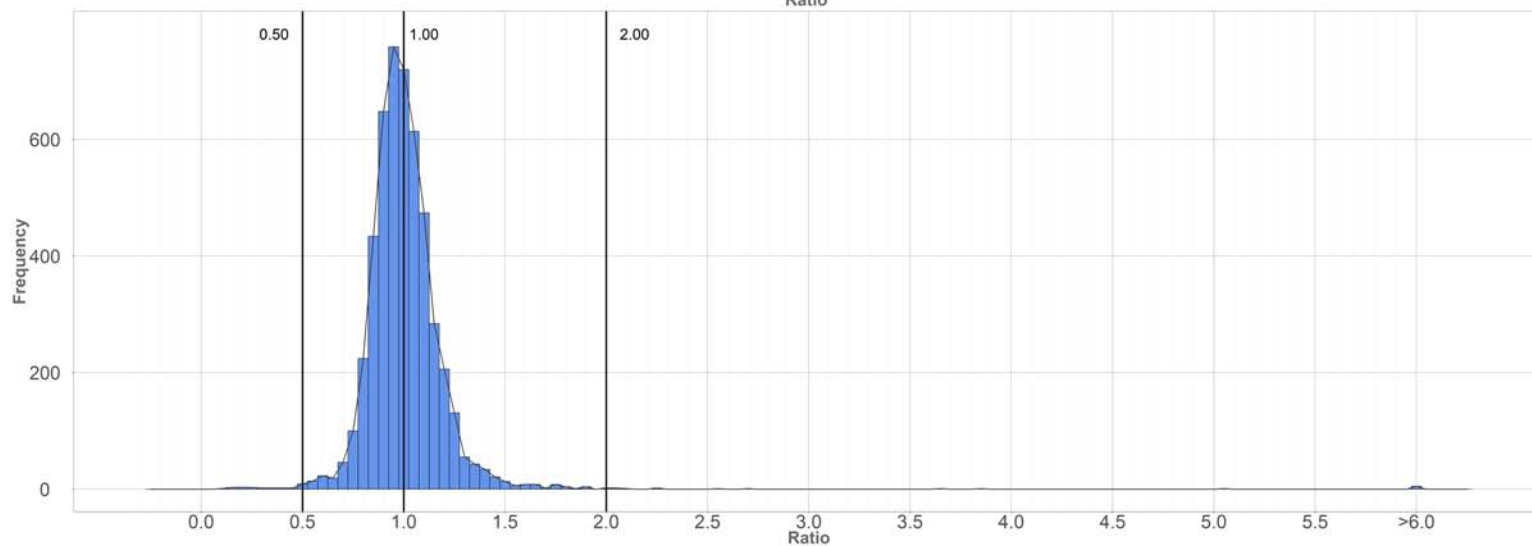

# Disomy XI

*cis*

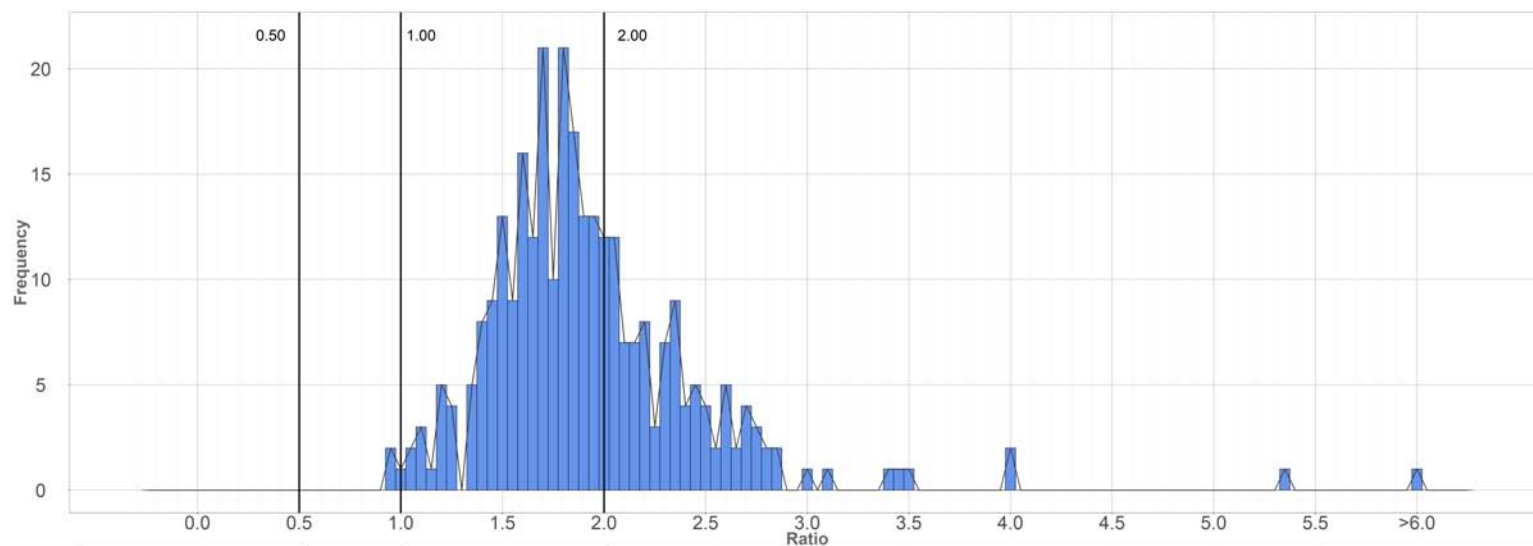

*trans*

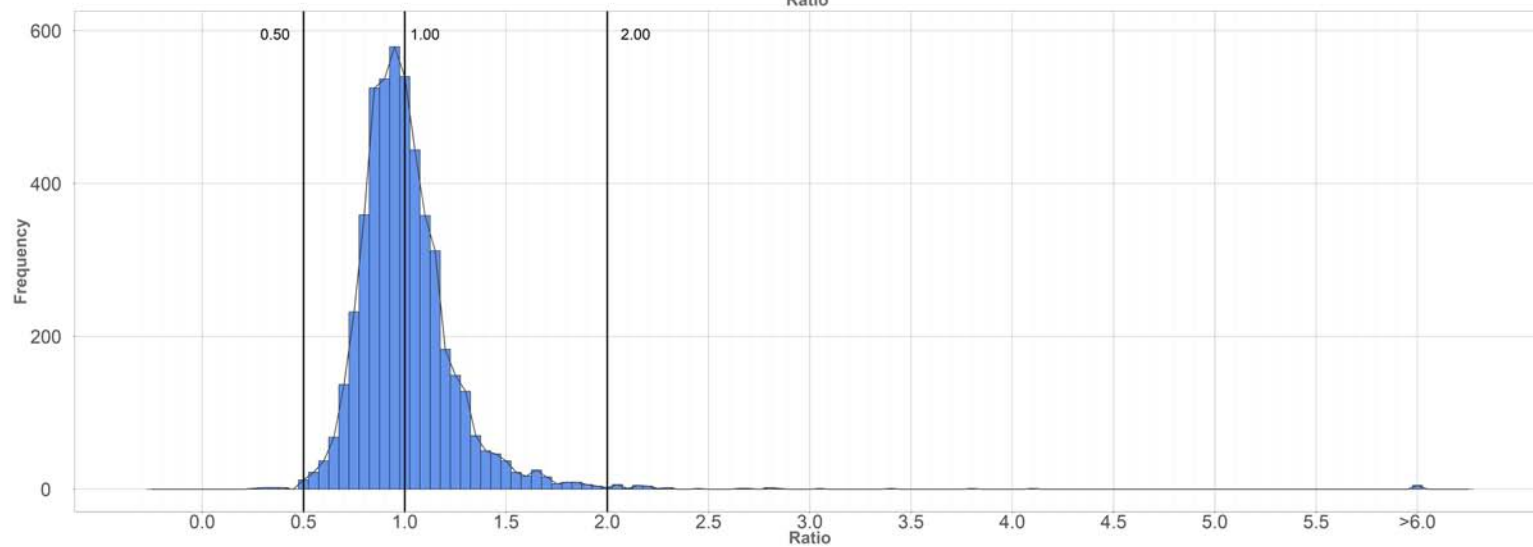



# Disomy XII

*cis*

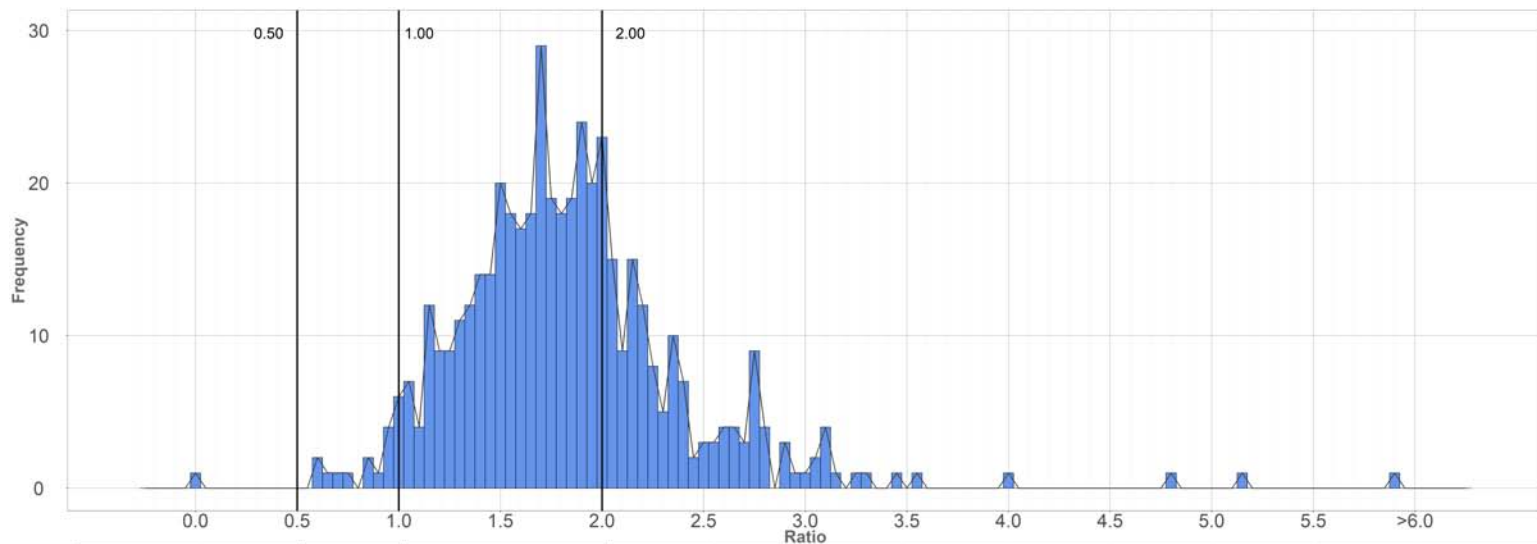

*trans*

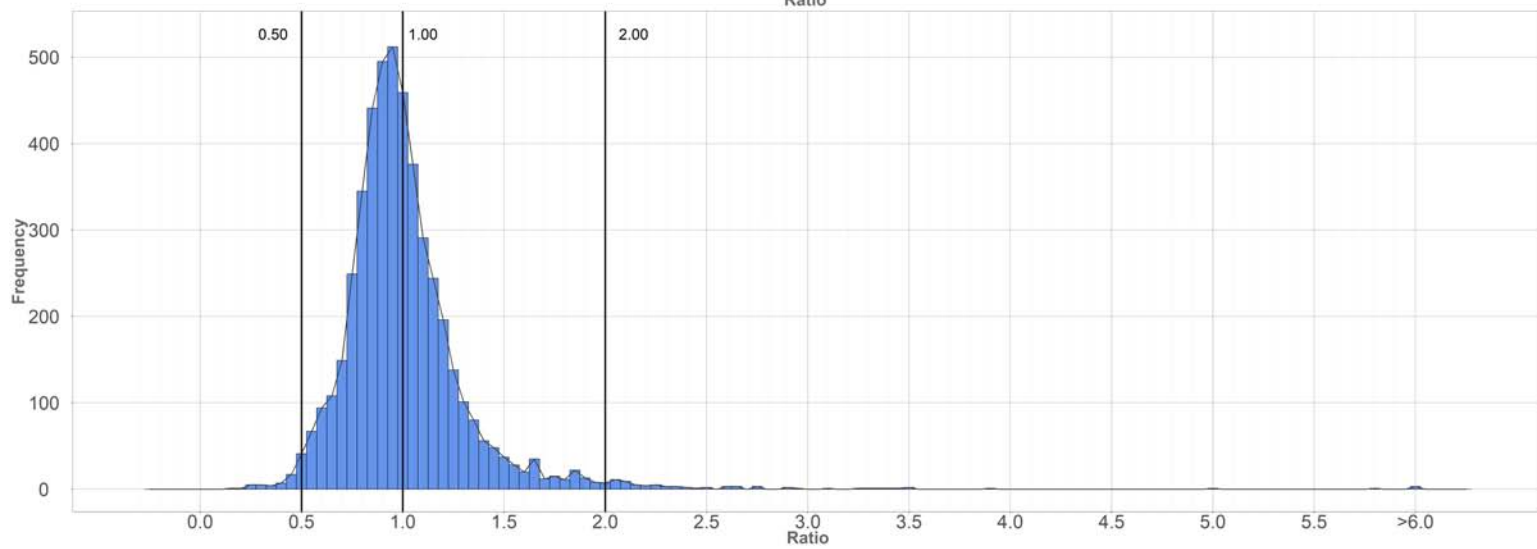

# Disomy XIII

*cis*

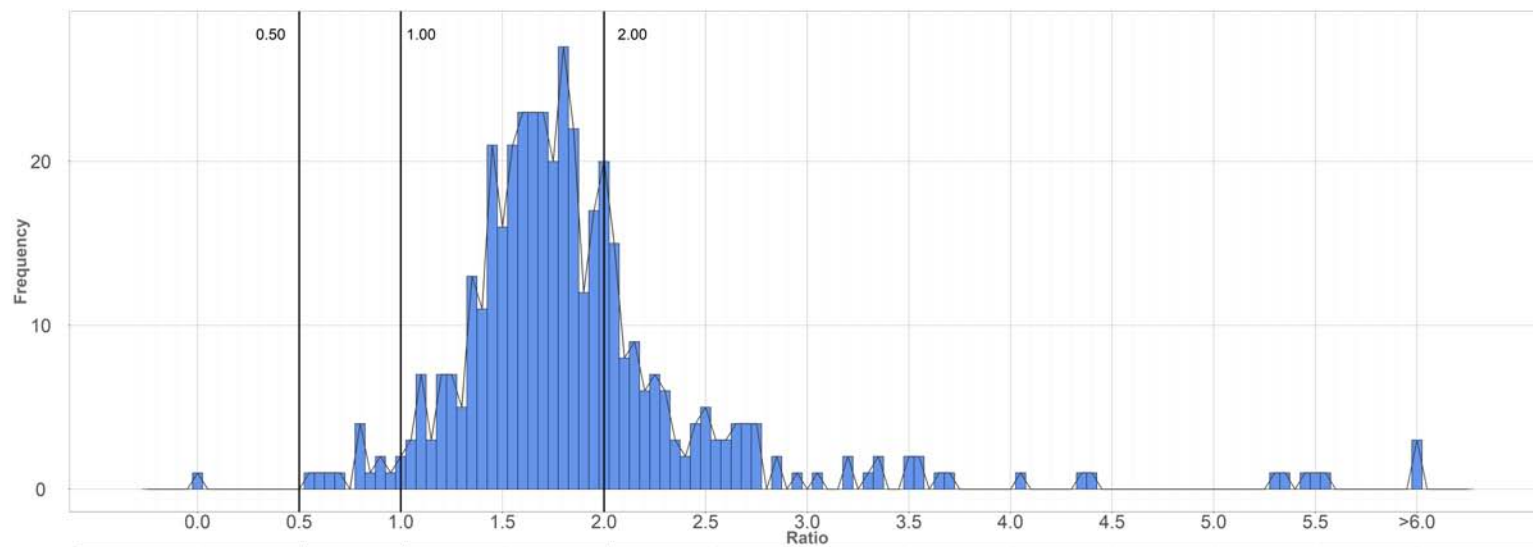

*trans*

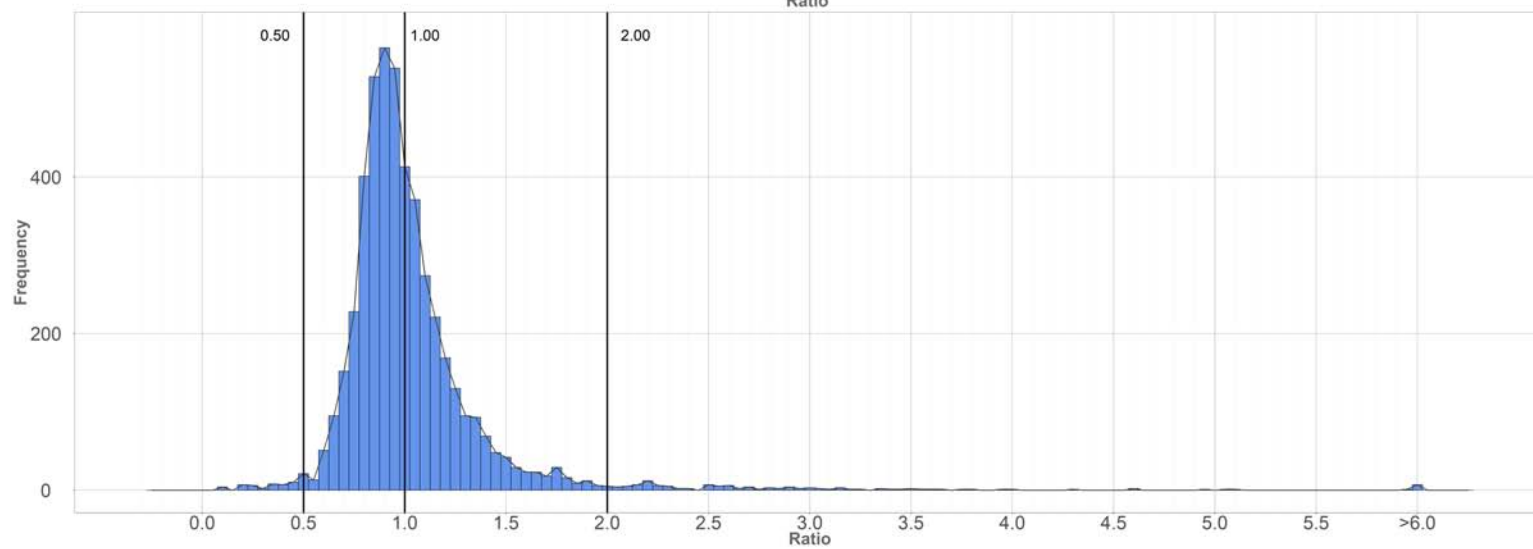

# Disomy XIV

*cis*

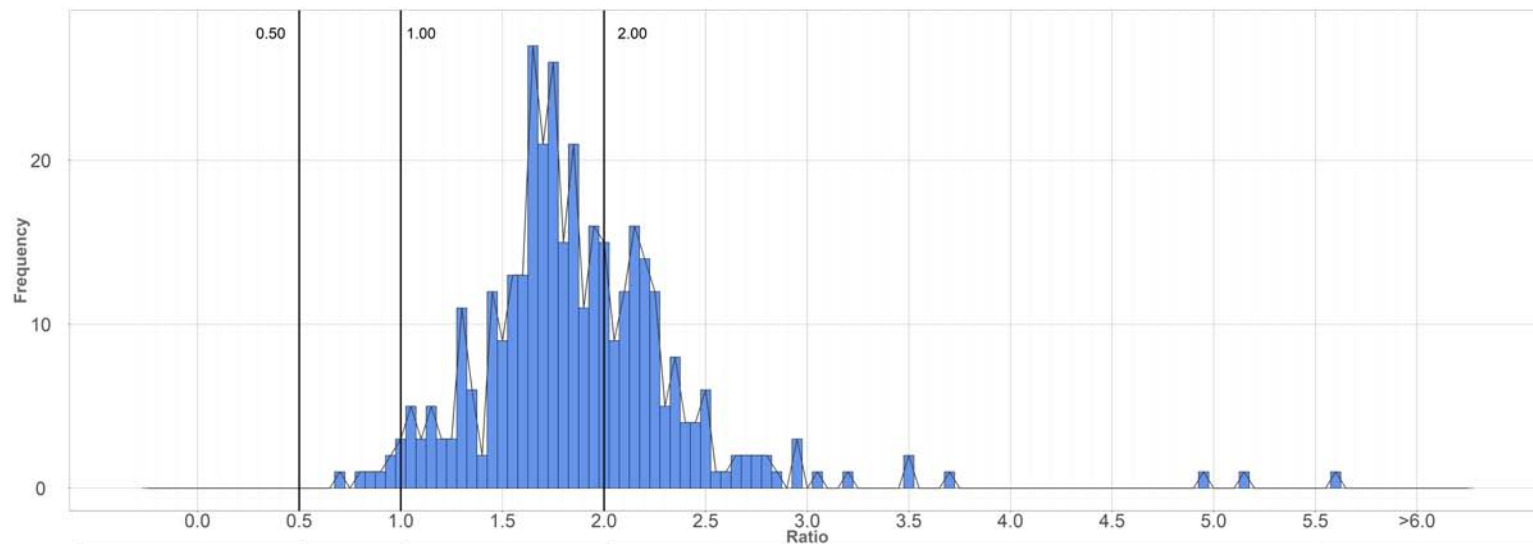

*trans*

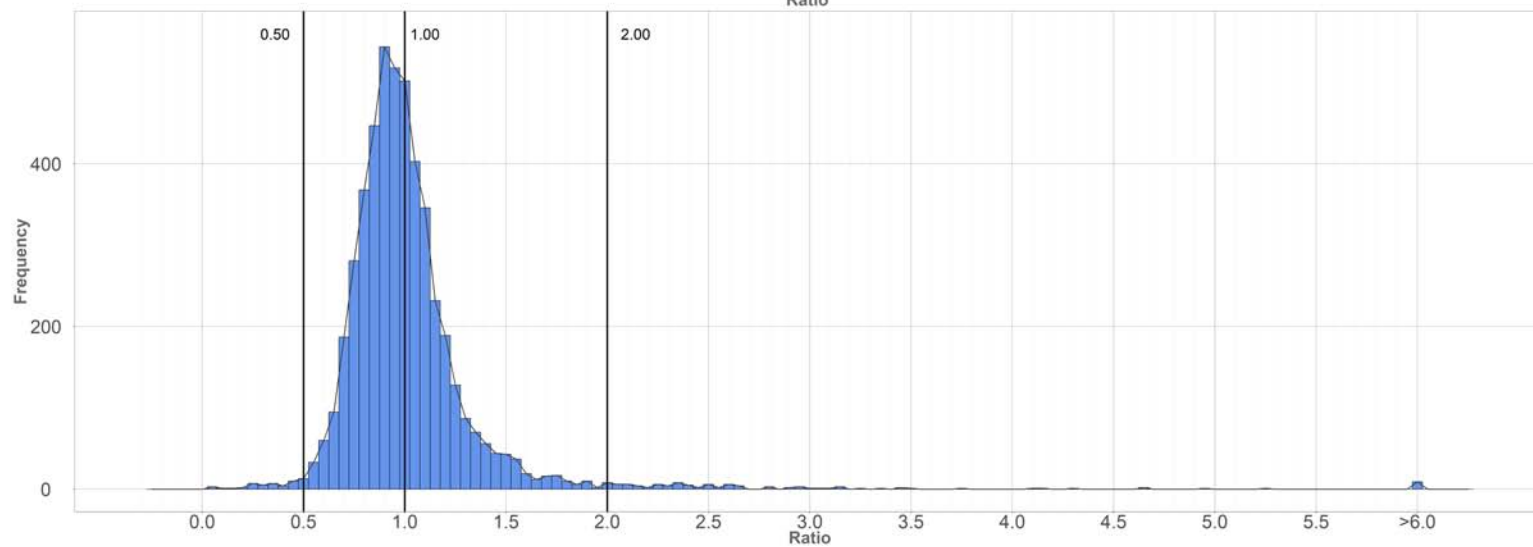

# Disomy XV

*cis*

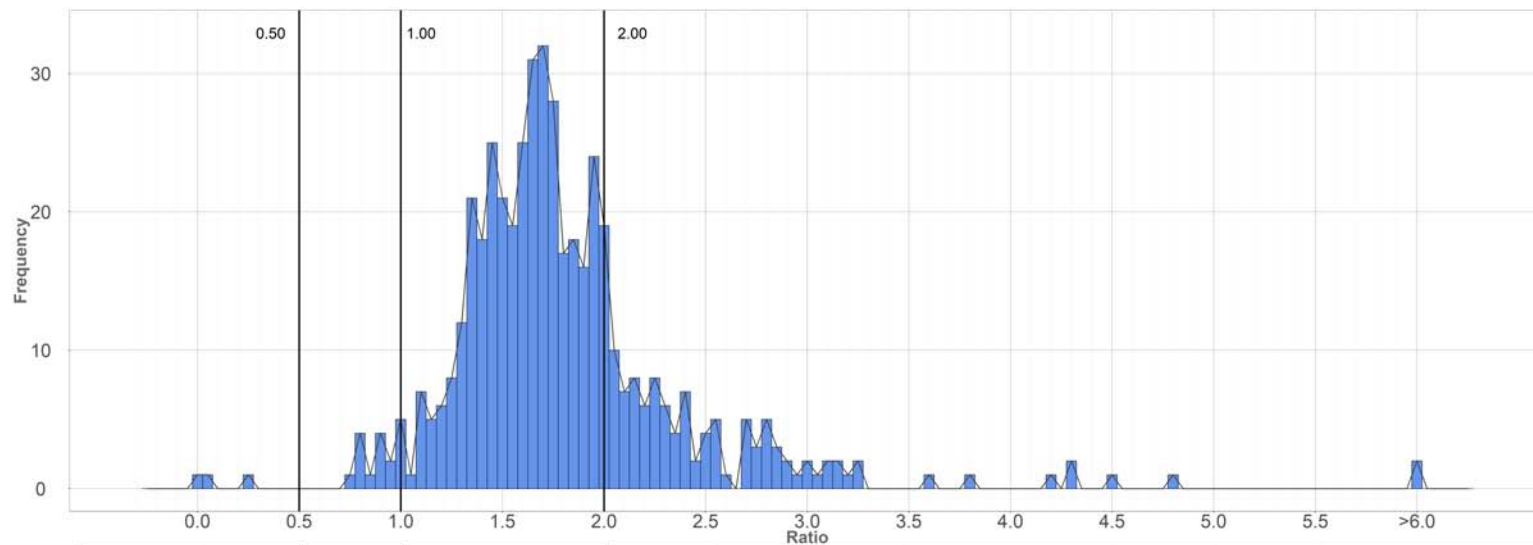

*trans*

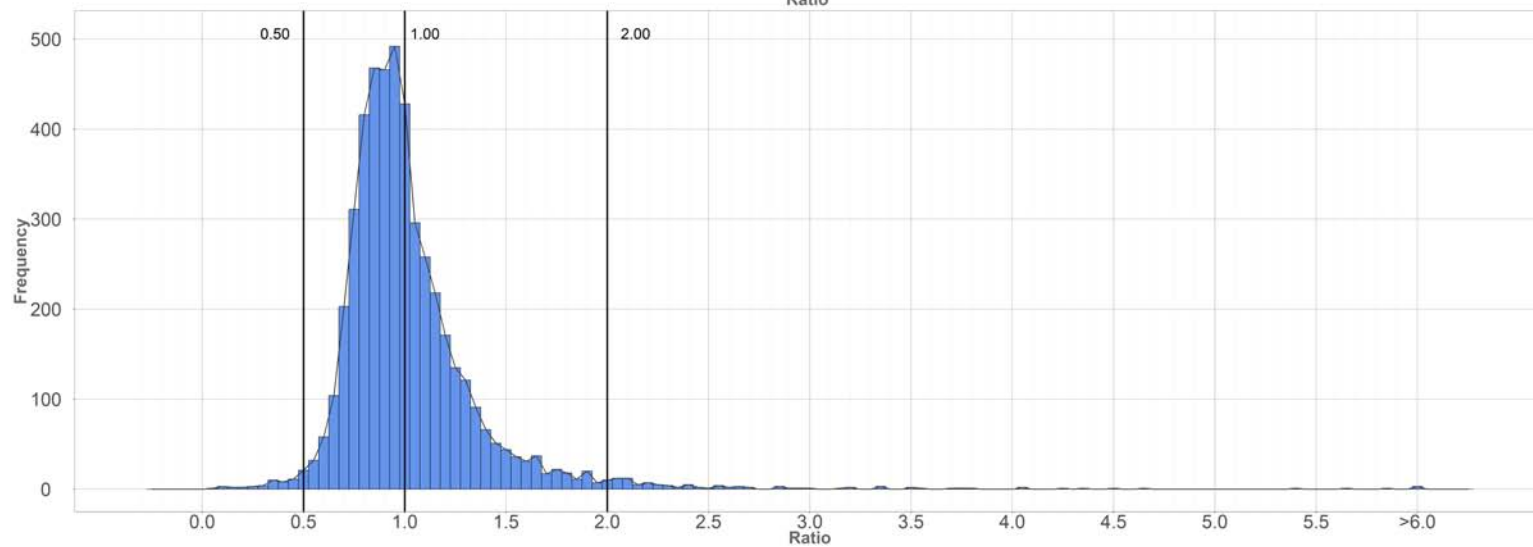

# Disomy XVI

*cis*

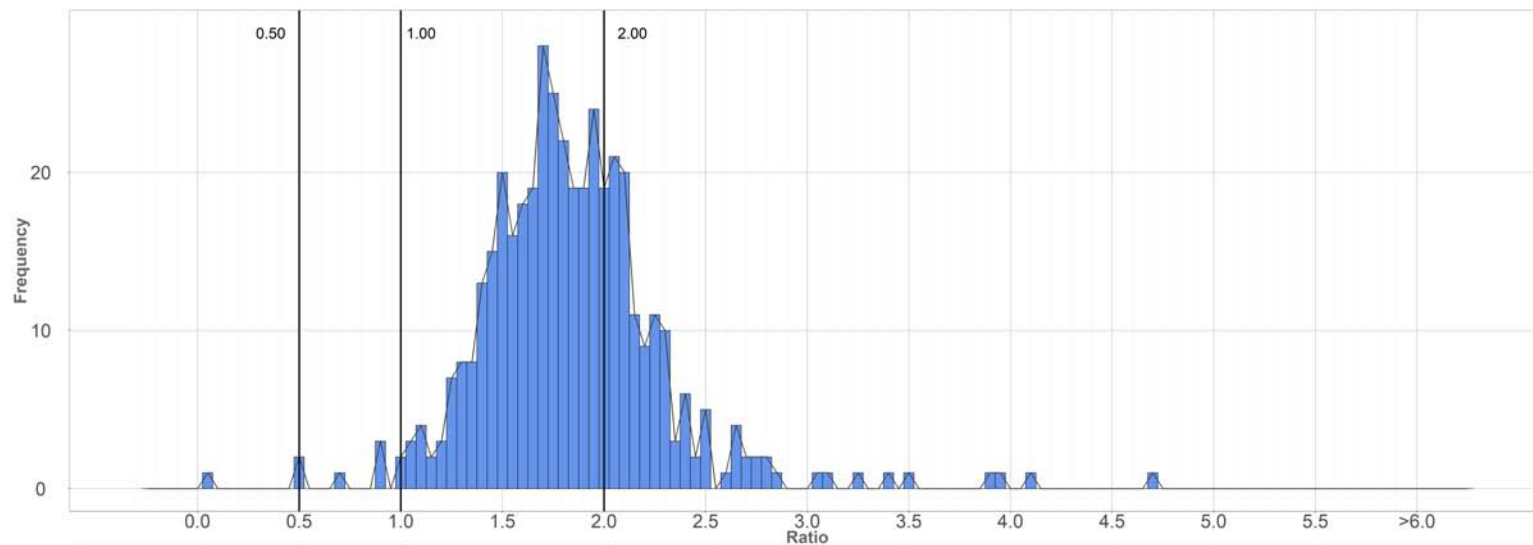

*trans*

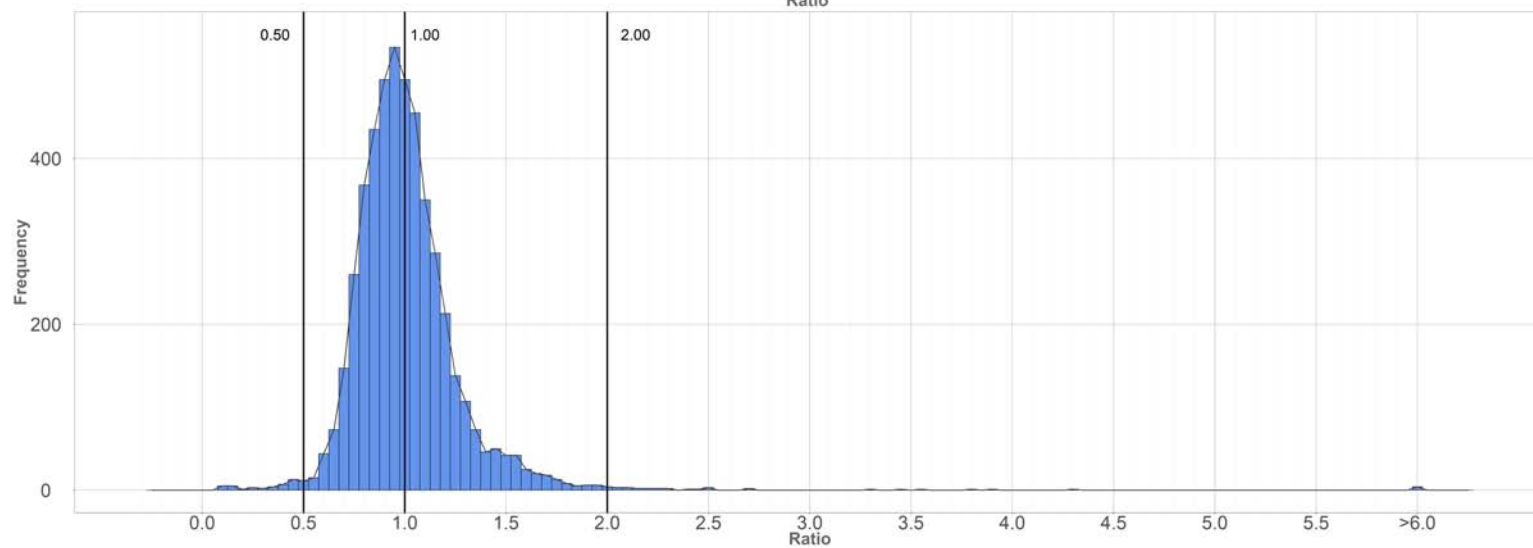

Fig. S17. Ratio distributions for gene expression in mouse trisomic cells versus normal diploids partitioned into cis and trans. Distributions were generated as described in Fig. 1.

# Trisomy 1

*cis*

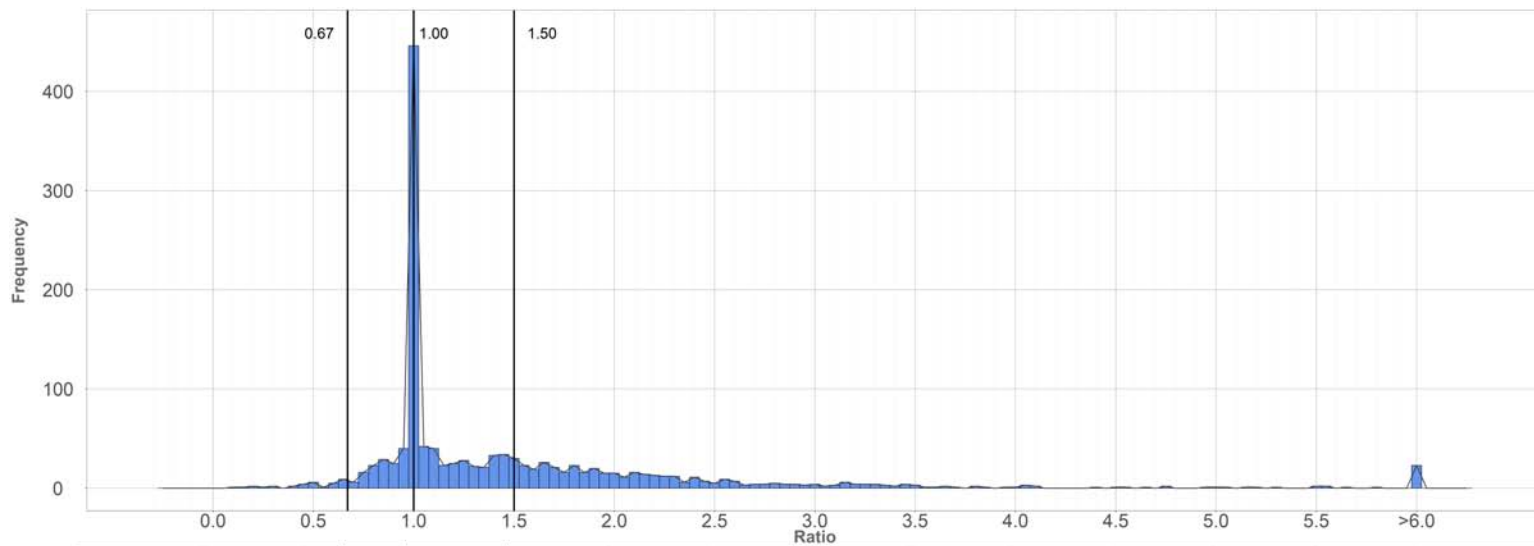

*trans*

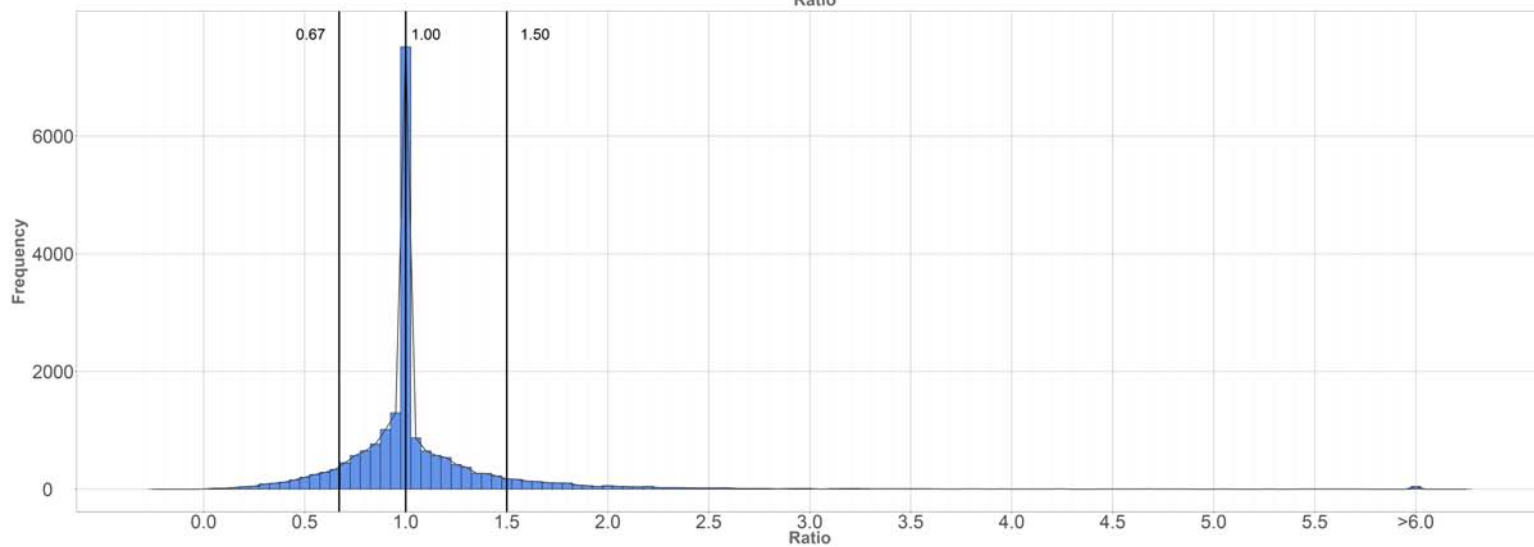

# Trisomy 13

*cis*

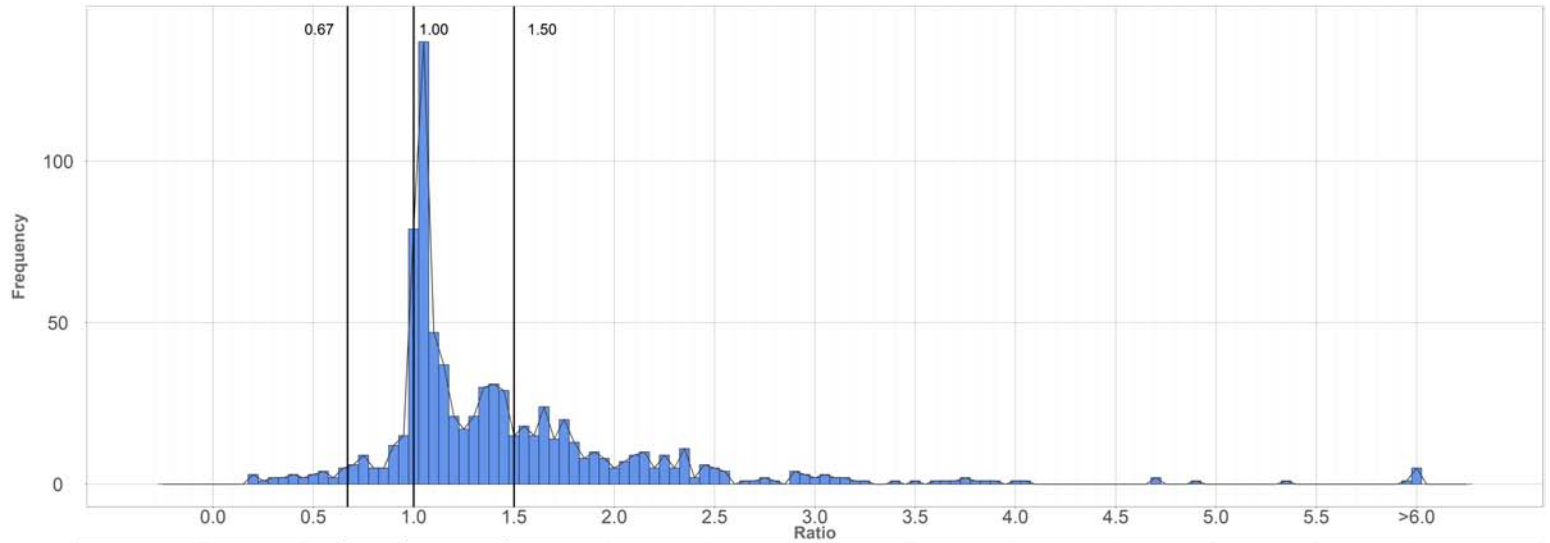

*trans*

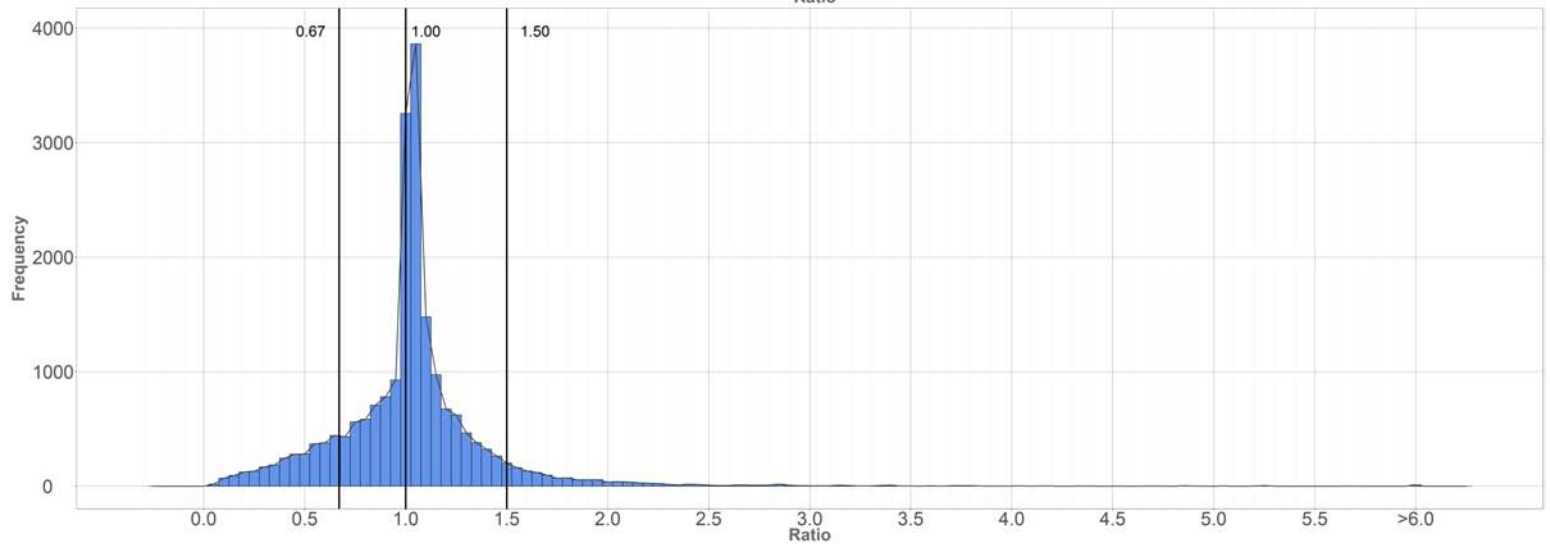



# Trisomy 16

*cis*

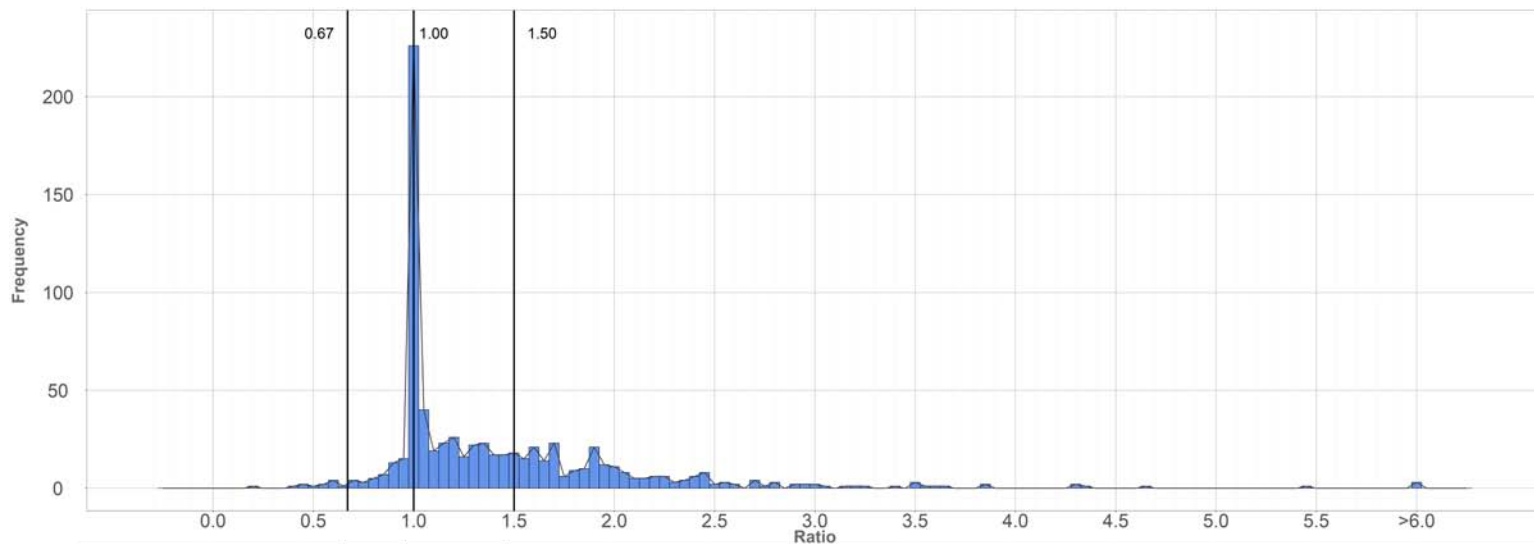

*trans*

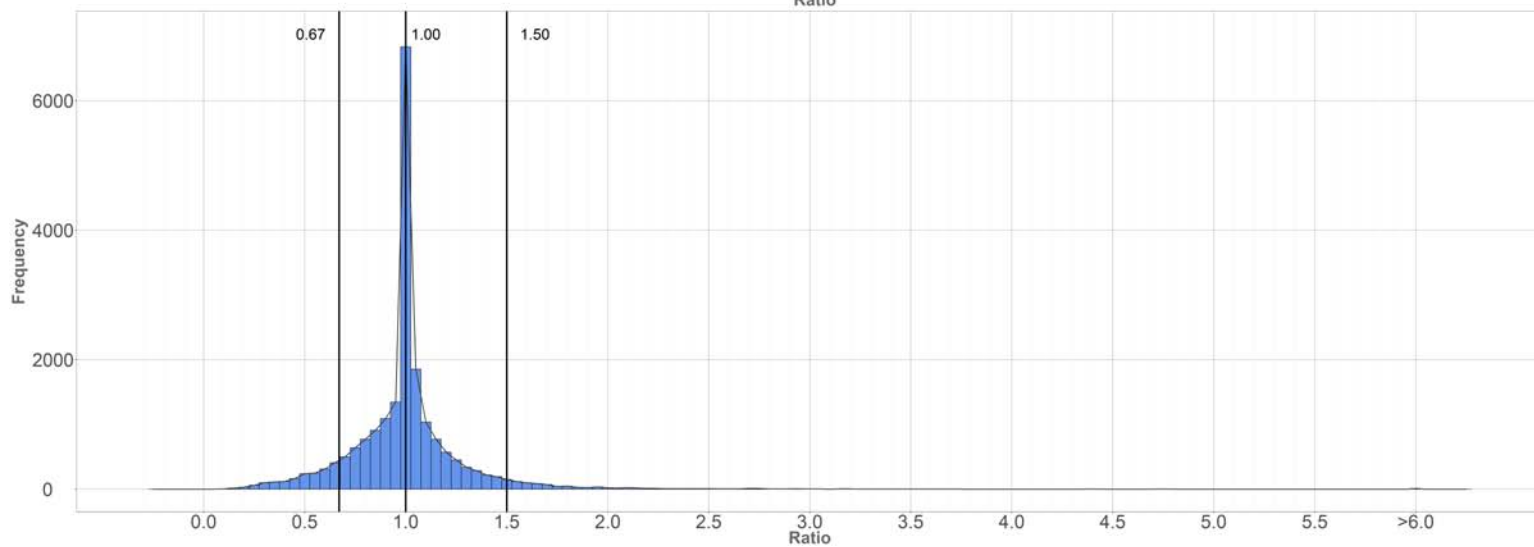

# Trisomy 19

*cis*

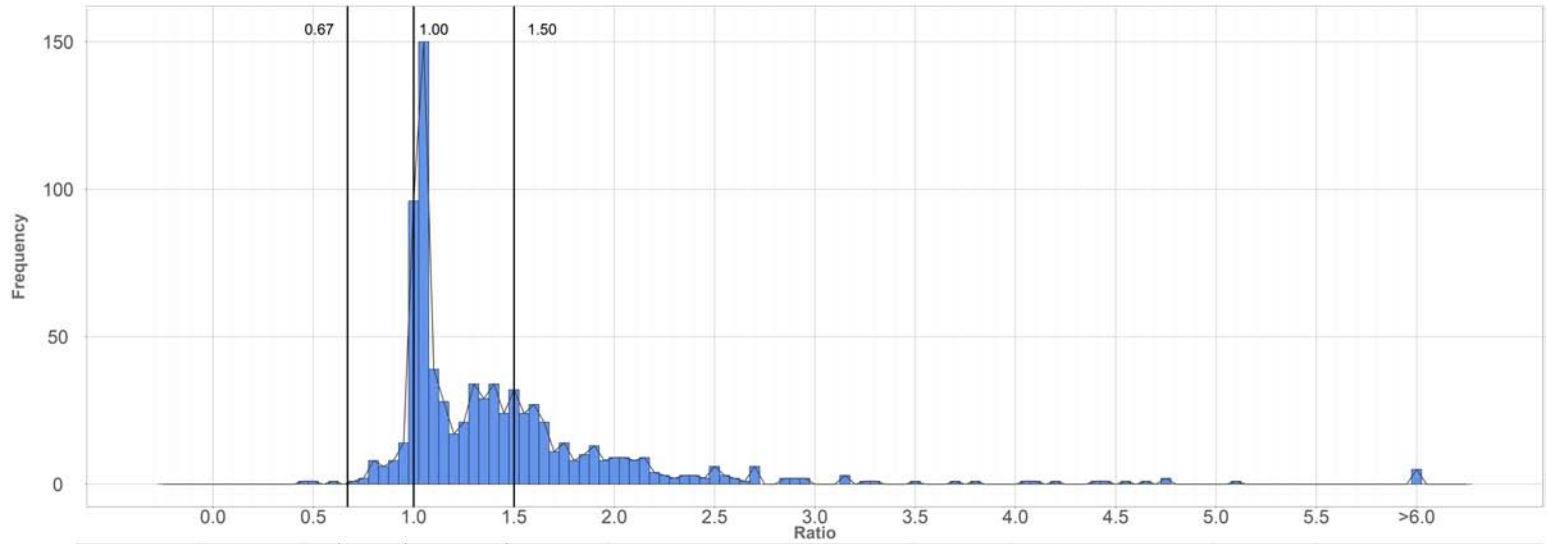

*trans*

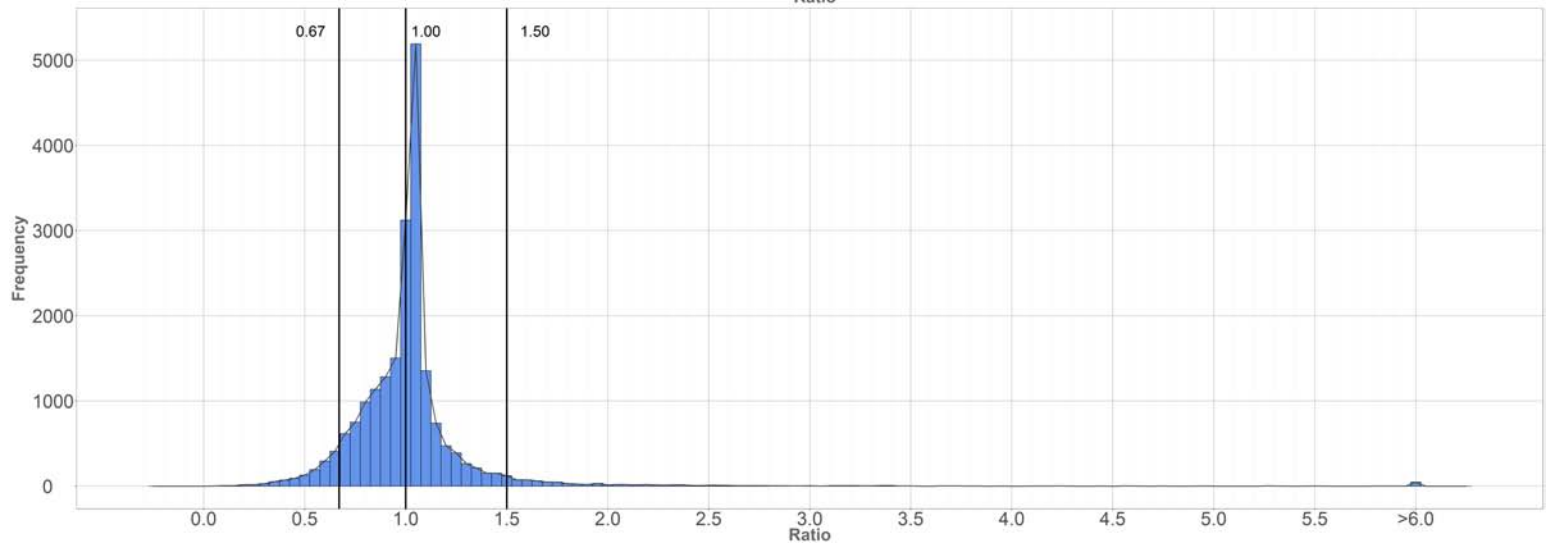

Table S1. Normality Tests. Tests of normal distribution via Anderson-Darling, Cramer-von Mises and Lilliefors (Kolmogorov-Smirnov) tests. Distribution types are listed in the column labeled "Category" and the probabilities that the distributions are normal in the corresponding row. The mean, standard deviation and median of each distribution are listed in the labeled columns. The categories are listed in the order of mention in the text.

| Category                                   | Anderson-Darling | Cramer-von Mises | Lilliefors | Mean     | Median   | S. D.     |
|--------------------------------------------|------------------|------------------|------------|----------|----------|-----------|
| Trisomy_1_cis                              | 3.70E-24         | 7.37E-10         | 3.25E-145  | 1.541206 | 1.193844 | 1.2021026 |
| Trisomy_1_trans                            | 3.70E-24         | 7.37E-10         | 0          | 1.16062  | 0.812377 | 1.2134731 |
| Trisomy_2_cis                              | 3.70E-24         | 7.37E-10         | 1.26E-79   | 1.969185 | 1.442409 | 1.145517  |
| Trisomy_2_trans                            | 3.70E-24         | 7.37E-10         | 0          | 1.397424 | 0.958454 | 1.1182438 |
| Trisomy_3_cis                              | 3.70E-24         | 7.37E-10         | 8.18E-104  | 1.825087 | 1.250025 | 1.3201039 |
| Trisomy_3_trans                            | 3.70E-24         | 7.37E-10         | 0          | 1.339706 | 0.823817 | 1.3330878 |
| Trisomy_4_cis                              | 3.70E-24         | 7.37E-10         | 8.32E-107  | 1.675956 | 1.243021 | 1.2266402 |
| Trisomy_4_trans                            | 3.70E-24         | 7.37E-10         | 0          | 1.27435  | 0.85286  | 1.2067089 |
| Trisomy_5_cis                              | 3.70E-24         | 7.37E-10         | 6.95E-214  | 1.867422 | 1.556418 | 1.1650578 |
| Trisomy_5_trans                            | 3.70E-24         | 7.37E-10         | 0          | 1.401015 | 1.042317 | 1.1742408 |
| Triploid                                   | 3.70E-24         | 7.37E-10         | 0          | 1.089689 | 0.833372 | 1.0114858 |
| Tetraploid                                 | 3.70E-24         | 7.37E-10         | 0          | 1.070478 | 0.813442 | 0.9417895 |
| Tetraploid_vs_Triploid                     | 3.70E-24         | 7.37E-10         | 0          | 1.251267 | 0.976833 | 0.8323096 |
| Trisomy1-Diploid_nonChr1_lowhigh_expr_low  | 3.70E-24         | 7.37E-10         | 2.64E-191  | 1.842411 | 0.770271 | 1.8368307 |
| Trisomy1-Diploid_nonChr1_lowhigh_expr_mod  | 3.70E-24         | 7.37E-10         | 8.62E-279  | 0.890666 | 0.819989 | 0.8148295 |
| Trisomy1-Diploid_nonChr1_lowhigh_expr_high | 3.70E-24         | 7.37E-10         | 2.90E-18   | 0.720685 | 0.699353 | 0.9243663 |
| Trisomy2-Diploid_nonChr2_lowhigh_expr_low  | 3.70E-24         | 7.37E-10         | 7.24E-257  | 2.225611 | 1.208861 | 1.7225188 |
| Trisomy2-Diploid_nonChr2_lowhigh_expr_mod  | 3.70E-24         | 7.37E-10         | 3.38E-172  | 1.063311 | 0.94019  | 0.7011392 |
| Trisomy2-Diploid_nonChr2_lowhigh_expr_high | 2.81E-20         | 7.37E-10         | 6.00E-12   | 0.918518 | 0.821447 | 0.7546879 |
| Trisomy3-Diploid_nonChr3_lowhigh_expr_low  | 3.70E-24         | 7.37E-10         | 0          | 2.250725 | 0.897256 | 1.9472074 |
| Trisomy3-Diploid_nonChr3_lowhigh_expr_mod  | 3.70E-24         | 7.37E-10         |            | 0.93291  | 0.821043 | 0.9004305 |
| Trisomy3-Diploid_nonChr3_lowhigh_expr_high | 3.00E-09         | 7.77E-07         | 6.11E-05   | 0.848349 | 0.744881 | 0.8595247 |
| Trisomy4-Diploid_nonChr4_lowhigh_expr_low  | 3.70E-24         | 7.37E-10         | 1.31E-216  | 2.116592 | 1.099445 | 1.7828325 |
| Trisomy4-Diploid_nonChr4_lowhigh_expr_mod  | 3.70E-24         | 7.37E-10         | 1.45E-279  | 0.946478 | 0.835469 | 0.8138589 |
| Trisomy4-Diploid_nonChr4_lowhigh_expr_high | 3.70E-24         | 7.37E-10         | 4.96E-28   | 0.673333 | 0.636115 | 0.9332617 |
| Trisomy5-Diploid_nonChr5_lowhigh_expr_low  | 3.70E-24         | 7.37E-10         | 1.74E-266  | 2.095586 | 1.013666 | 1.81514   |
| Trisomy5-Diploid_nonChr5_lowhigh_expr_mod  | 3.70E-24         | 7.37E-10         | 0          | 1.113134 | 1.059005 | 0.7412598 |
| Trisomy5-Diploid_nonChr5_lowhigh_expr_high | 4.41E-15         | 1.92E-09         | 9.85E-11   | 0.897011 | 0.830217 | 0.6604507 |
| Transcription_Factor_Trisomy_1_cis         | 1.64E-12         | 2.32E-07         | 0.00010299 | 1.628581 | 1.06875  | 1.4430832 |
| Transcription_Factor_Trisomy_1_trans       | 3.70E-24         | 7.37E-10         | 2.55E-15   | 1.139424 | 0.736166 | 1.3344783 |
| Transcription_Factor_Trisomy_2_cis         | 2.37E-08         | 5.95E-06         | 0.00023847 | 1.897438 | 1.502219 | 1.1327011 |
| Transcription_Factor_Trisomy_2_trans       | 3.70E-24         | 7.37E-10         | 6.65E-17   | 1.509862 | 1.01544  | 1.2438388 |
| Transcription_Factor_Trisomy_3_cis         | 1.55E-07         | 0.000193711      | 3.34E-05   | 1.93714  | 1.270514 | 1.4381132 |
| Transcription_Factor_Trisomy_3_trans       | 3.70E-24         | 7.37E-10         | 4.01E-13   | 1.367095 | 0.835899 | 1.4410182 |

|                                      |             |             |            |          |          |           |
|--------------------------------------|-------------|-------------|------------|----------|----------|-----------|
| Transcription_Factor_Trisomy_4_cis   | 2.42E-09    | 9.98E-07    | 2.84E-08   | 1.885215 | 1.37227  | 1.3938744 |
| Transcription_Factor_Trisomy_4_trans | 3.70E-24    | 7.37E-10    | 4.24E-16   | 1.462612 | 0.967364 | 1.3884492 |
| Transcription_Factor_Trisomy_5_cis   | 2.66E-11    | 1.54E-07    | 6.08E-07   | 1.989832 | 1.531275 | 1.3052282 |
| Transcription_Factor_Trisomy_5_trans | 3.70E-24    | 7.37E-10    | 4.56E-17   | 1.497833 | 1.092566 | 1.2571784 |
| Transcription_Factor_Triploid        | 3.70E-24    | 7.37E-10    | 1.12E-57   | 1.112974 | 0.870602 | 1.1257578 |
| Transcription_Factor_Tetraploid      | 3.70E-24    | 7.37E-10    | 7.32E-58   | 1.152064 | 0.83817  | 1.0488517 |
| Signal_Transduction_Trisomy_1_cis    | 0.002561836 | 0.007499645 | 0.00807779 | 1.695803 | 0.916368 | 1.4254501 |
| Signal_Transduction_Trisomy_1_trans  | 4.45E-08    | 3.88E-06    | 0.00014433 | 1.361759 | 0.799065 | 1.3144903 |
| Signal_Transduction_Trisomy_2_cis    | 0.043170875 | 0.092095278 | 0.34034357 | 2.441382 | 1.777698 | 0.9649001 |
| Signal_Transduction_Trisomy_2_trans  | 2.39E-10    | 2.27E-07    | 7.79E-07   | 1.365149 | 1.05564  | 0.9258905 |
| Signal_Transduction_Trisomy_3_cis    | 0.003910055 | 0.008013397 | 0.0360673  | 1.449054 | 1.106452 | 1.2736708 |
| Signal_Transduction_Trisomy_3_trans  | 9.27E-07    | 4.39E-05    | 0.00013619 | 1.200655 | 0.796655 | 1.2448592 |
| Signal_Transduction_Trisomy_4_cis    | 0.028228909 | 0.05489984  | 0.0563945  | 1.668014 | 1.251559 | 1.2188721 |
| Signal_Transduction_Trisomy_4_trans  | 9.26E-08    | 3.42E-05    | 0.00012912 | 1.552014 | 0.874994 | 1.4192602 |
| Signal_Transduction_Trisomy_5_cis    | 0.008239117 | 0.010946823 | 0.03660419 | 1.805261 | 1.49547  | 1.1242128 |
| Signal_Transduction_Trisomy_5_trans  | 2.05E-05    | 0.000195959 | 0.00105896 | 1.448018 | 1.074501 | 1.1673652 |
| Signal_Transduction_Triploid         | 1.52E-20    | 7.37E-10    | 2.69E-13   | 1.016609 | 0.815033 | 1.0356425 |
| Signal_Transduction_Tetraploid       | 7.72E-22    | 7.37E-10    | 1.98E-08   | 0.991561 | 0.813146 | 0.7811345 |
| Ribosomal_Trisomy_1_cis              | 2.85E-21    | 7.37E-10    | 2.95E-14   | 1.519466 | 1.573277 | 0.8581361 |
| Ribosomal_Trisomy_1_trans            | 3.70E-24    | 7.37E-10    | 8.34E-22   | 1.17758  | 1.120487 | 0.8346377 |
| Ribosomal_Trisomy_2_cis              | 2.93E-07    | 3.08E-06    | 0.00049671 | 1.939697 | 1.8424   | 1.1259415 |
| Ribosomal_Trisomy_2_trans            | 3.70E-24    | 7.37E-10    | 4.53E-14   | 1.181399 | 1.202587 | 0.8197582 |
| Ribosomal_Trisomy_3_cis              | 5.70E-11    | 7.14E-08    | 4.18E-06   | 1.34582  | 1.28549  | 0.7733473 |
| Ribosomal_Trisomy_3_trans            | 3.70E-24    | 7.37E-10    | 9.36E-11   | 0.839257 | 0.797619 | 0.7912084 |
| Ribosomal_Trisomy_4_cis              | 0.000109534 | 0.000340135 | 0.00022785 | 1.295218 | 1.336916 | 0.3895513 |
| Ribosomal_Trisomy_4_trans            | 3.70E-24    | 7.37E-10    | 3.78E-24   | 0.882467 | 0.883625 | 0.8171076 |
| Ribosomal_Trisomy_5_cis              | 4.87E-15    | 8.02E-10    | 1.57E-07   | 1.673607 | 1.681966 | 0.9524536 |
| Ribosomal_Trisomy_5_trans            | 3.70E-24    | 7.37E-10    | 1.22E-20   | 1.188725 | 1.1233   | 0.780881  |
| Ribosomal_Triploid                   | 3.70E-24    | 7.37E-10    | 1.83E-66   | 0.834995 | 0.826989 | 0.6735068 |
| Ribosomal_Tetraploid                 | 3.70E-24    | 7.37E-10    | 2.34E-61   | 0.838168 | 0.859317 | 0.6671859 |
| Proteasome_Trisomy_1_cis             | 0.000685145 | 0.001443091 | 0.01468371 | 1.393474 | 1.493671 | 0.64537   |
| Proteasome_Trisomy_1_trans           | 1.29E-06    | 9.52E-06    | 0.00124919 | 0.943019 | 0.980938 | 0.4888129 |
| Proteasome_Trisomy_2_cis             | 0.902668646 | 0.967619642 | 0.98169615 | 1.360064 | 1.328303 | 0.2760929 |
| Proteasome_Trisomy_2_trans           | 3.39E-10    | 7.94E-08    | 2.46E-05   | 1.046987 | 0.971591 | 0.49138   |
| Proteasome_Trisomy_3_cis             | 0.000265384 | 0.000763636 | 0.00224564 | 1.350292 | 1.383072 | 0.5868045 |

|                                |             |             |            |          |          |           |
|--------------------------------|-------------|-------------|------------|----------|----------|-----------|
| Proteasome_Trisomy_3_trans     | 5.71E-13    | 2.38E-09    | 9.51E-07   | 1.009393 | 0.842825 | 0.6893171 |
| Proteasome_Trisomy_4_cis       | 0.319464832 | 0.312568727 | 0.36342371 | 1.12939  | 1.1596   | 0.4035444 |
| Proteasome_Trisomy_4_trans     | 1.18E-14    | 1.04E-09    | 3.24E-09   | 0.993526 | 0.853462 | 0.6347412 |
| Proteasome_Trisomy_5_cis       | 4.57E-11    | 6.65E-09    | 4.21E-09   | 1.616651 | 1.686124 | 0.7641092 |
| Proteasome_Trisomy_5_trans     | 0.002103932 | 0.00246974  | 0.01768236 | 1.133642 | 1.097159 | 0.3333376 |
| Proteasome_Triploid            | 8.04E-19    | 7.37E-10    | 1.65E-10   | 0.862295 | 0.822717 | 0.4360978 |
| Proteasome_Tetraploid          | 4.09E-16    | 7.37E-10    | 8.34E-10   | 0.854421 | 0.816676 | 0.4095613 |
| Stress_Related_Trisomy_1_cis   | 1.14E-09    | 1.83E-07    | 1.10E-06   | 1.62889  | 1.301325 | 1.2213036 |
| Stress_Related_Trisomy_1_trans | 4.40E-17    | 1.42E-09    | 3.48E-10   | 1.273153 | 0.80088  | 1.3011649 |
| Stress_Related_Trisomy_2_cis   | 6.08E-05    | 0.000423664 | 0.0072484  | 2.045766 | 1.514642 | 1.0184892 |
| Stress_Related_Trisomy_2_trans | 2.69E-21    | 7.37E-10    | 3.68E-11   | 1.39206  | 1.019667 | 1.0495232 |
| Stress_Related_Trisomy_3_cis   | 4.50E-05    | 0.00017449  | 0.0020071  | 1.643466 | 1.2154   | 1.0852578 |
| Stress_Related_Trisomy_3_trans | 5.61E-13    | 1.73E-08    | 1.38E-08   | 1.287487 | 0.872834 | 1.2326544 |
| Stress_Related_Trisomy_4_cis   | 0.000195115 | 0.000646523 | 0.02855321 | 1.508782 | 1.223791 | 1.1242128 |
| Stress_Related_Trisomy_4_trans | 4.16E-20    | 7.37E-10    | 2.87E-15   | 1.370959 | 0.870108 | 1.3335399 |
| Stress_Related_Trisomy_5_cis   | 7.55E-08    | 2.20E-06    | 5.72E-05   | 1.937176 | 1.587439 | 1.1906829 |
| Stress_Related_Trisomy_5_trans | 1.62E-23    | 7.37E-10    | 1.99E-12   | 1.303935 | 1.082336 | 0.9805608 |
| Stress_Related_Triploid        | 3.70E-24    | 7.37E-10    | 9.88E-26   | 0.901884 | 0.795246 | 0.8666066 |
| Stress_Related_Tetraploid      | 3.70E-24    | 7.37E-10    | 4.12E-34   | 1.054861 | 0.826209 | 0.8767624 |
| Plastid_Trisomy_1_cis          | 3.70E-24    | 7.37E-10    | 1.38E-25   | 1.38415  | 1.320678 | 0.8262559 |
| Plastid_Trisomy_1_trans        | 3.70E-24    | 7.37E-10    | 5.85E-48   | 0.979084 | 0.895882 | 0.757285  |
| Plastid_Trisomy_2_cis          | 1.45E-22    | 7.37E-10    | 5.47E-15   | 1.295758 | 1.165316 | 0.7936178 |
| Plastid_Trisomy_2_trans        | 3.70E-24    | 7.37E-10    | 9.36E-27   | 0.881392 | 0.781389 | 0.6477366 |
| Plastid_Trisomy_3_cis          | 1.79E-18    | 7.37E-10    | 5.61E-10   | 1.275116 | 1.153734 | 0.7759409 |
| Plastid_Trisomy_3_trans        | 3.70E-24    | 7.37E-10    | 1.95E-29   | 0.879516 | 0.7587   | 0.7832435 |
| Plastid_Trisomy_4_cis          | 1.90E-15    | 9.24E-10    | 7.35E-07   | 1.235296 | 1.085405 | 0.7487904 |
| Plastid_Trisomy_4_trans        | 3.70E-24    | 7.37E-10    | 1.03E-29   | 0.832394 | 0.708582 | 0.7887316 |
| Plastid_Trisomy_5_cis          | 3.70E-24    | 7.37E-10    | 1.12E-16   | 1.436107 | 1.384937 | 0.6321653 |
| Plastid_Trisomy_5_trans        | 3.70E-24    | 7.37E-10    | 3.78E-34   | 0.981602 | 0.922517 | 0.6226902 |
| Plastid_Triploid               | 3.70E-24    | 7.37E-10    | 4.78E-62   | 0.832968 | 0.803243 | 0.471221  |
| Plastid_Tetraploid             | 3.70E-24    | 7.37E-10    | 1.58E-86   | 0.868164 | 0.791809 | 0.5141355 |
| Mitochondria_Trisomy_1_cis     | 1.77E-21    | 7.37E-10    | 2.44E-13   | 1.40438  | 1.307965 | 0.7427028 |
| Mitochondria_Trisomy_1_trans   | 3.70E-24    | 7.37E-10    | 3.06E-33   | 0.953281 | 0.882474 | 0.7380886 |
| Mitochondria_Trisomy_2_cis     | 7.73E-12    | 4.56E-08    | 4.45E-05   | 1.417459 | 1.257019 | 0.6266607 |
| Mitochondria_Trisomy_2_trans   | 3.70E-24    | 7.37E-10    | 1.17E-19   | 0.977313 | 0.896768 | 0.6388968 |

|                              |             |             |            |          |          |           |
|------------------------------|-------------|-------------|------------|----------|----------|-----------|
| Mitochondria_Trisomy_3_cis   | 5.55E-06    | 2.36E-05    | 0.00164973 | 1.198998 | 1.078392 | 0.6424714 |
| Mitochondria_Trisomy_3_trans | 3.70E-24    | 7.37E-10    | 1.79E-21   | 0.882277 | 0.761363 | 0.7795771 |
| Mitochondria_Trisomy_4_cis   | 2.22E-11    | 1.76E-08    | 2.48E-08   | 1.315437 | 1.158668 | 0.7607053 |
| Mitochondria_Trisomy_4_trans | 3.70E-24    | 7.37E-10    | 4.63E-37   | 0.921586 | 0.782012 | 0.7358782 |
| Mitochondria_Trisomy_5_cis   | 8.75E-10    | 9.85E-07    | 3.00E-05   | 1.693017 | 1.562122 | 0.6563199 |
| Mitochondria_Trisomy_5_trans | 3.70E-24    | 7.37E-10    | 5.46E-13   | 1.100793 | 1.039954 | 0.6240763 |
| Mitochondria_Triploid        | 3.70E-24    | 7.37E-10    | 1.58E-43   | 0.828995 | 0.78894  | 0.4991075 |
| Mitochondria_Tetraploid      | 3.70E-24    | 7.37E-10    | 1.29E-58   | 0.841412 | 0.779162 | 0.5188322 |
| Peroxisome_Trisomy_1_cis     | 2.52E-05    | 2.82E-05    | 0.00066455 | 1.417633 | 1.278669 | 0.9401533 |
| Peroxisome_Trisomy_1_trans   | 2.06E-20    | 7.37E-10    | 3.71E-13   | 1.017684 | 0.843534 | 0.9602071 |
| Peroxisome_Trisomy_2_cis     | 7.45E-06    | 6.04E-05    | 0.00817057 | 1.57395  | 1.392066 | 0.9138212 |
| Peroxisome_Trisomy_2_trans   | 4.88E-19    | 7.37E-10    | 8.25E-10   | 1.130627 | 0.937839 | 0.7430773 |
| Peroxisome_Trisomy_3_cis     | 1.16E-05    | 3.67E-05    | 0.0005993  | 1.451305 | 1.30959  | 0.9495732 |
| Peroxisome_Trisomy_3_trans   | 1.11E-17    | 7.37E-10    | 1.69E-10   | 1.078622 | 0.867201 | 0.9816754 |
| Peroxisome_Trisomy_4_cis     | 3.58E-05    | 0.000216909 | 0.00361307 | 1.661254 | 1.258809 | 0.9745399 |
| Peroxisome_Trisomy_4_trans   | 2.65E-17    | 7.37E-10    | 2.82E-09   | 1.027019 | 0.849237 | 0.9285679 |
| Peroxisome_Trisomy_5_cis     | 4.04E-14    | 1.27E-09    | 2.42E-10   | 1.650581 | 1.586276 | 0.8561987 |
| Peroxisome_Trisomy_5_trans   | 9.04E-23    | 7.37E-10    | 1.63E-11   | 1.155234 | 1.051102 | 0.8026153 |
| Peroxisome_Triploid          | 3.70E-24    | 7.37E-10    | 4.03E-25   | 0.858222 | 0.81953  | 0.5727314 |
| Peroxisome_Tetraploid        | 3.70E-24    | 7.37E-10    | 1.06E-23   | 0.954765 | 0.820782 | 0.635301  |
| gbm_cis_Trisomy_1            | 3.70E-24    | 7.37E-10    | 2.41E-22   | 1.282072 | 1.259802 | 0.5842169 |
| gbm_trans_Trisomy_1          | 3.70E-24    | 7.37E-10    | 7.79E-58   | 0.902483 | 0.84995  | 0.6195949 |
| gbm_cis_Trisomy_2            | 2.24E-15    | 3.40E-09    | 4.18E-08   | 1.399573 | 1.288845 | 0.5331068 |
| gbm_trans_Trisomy_2          | 3.70E-24    | 7.37E-10    | 4.73E-31   | 0.94477  | 0.884565 | 0.5280399 |
| gbm_cis_Trisomy_3            | 3.70E-24    | 7.37E-10    | 4.09E-18   | 1.461322 | 1.357786 | 0.6768003 |
| gbm_trans_Trisomy_3          | 3.70E-24    | 7.37E-10    | 3.49E-69   | 0.92972  | 0.882651 | 0.6792588 |
| gbm_cis_Trisomy_4            | 0.000402399 | 0.000606498 | 0.0008833  | 1.568983 | 1.316347 | 0.7279741 |
| gbm_trans_Trisomy_4          | 3.70E-24    | 7.37E-10    | 3.41E-41   | 0.954995 | 0.874337 | 0.6829143 |
| gbm_cis_Trisomy_5            | 7.84E-20    | 7.37E-10    | 1.69E-10   | 1.661533 | 1.604651 | 0.5164782 |
| gbm_trans_Trisomy_5          | 3.70E-24    | 7.37E-10    | 2.53E-34   | 1.131205 | 1.1097   | 0.5097623 |
| mCHH_cis_Trisomy_1           | 0.006185102 | 0.043855265 | 0.01569947 | 2.520118 | 1.372176 | 1.83758   |
| mCHH_trans_Trisomy_1         | 7.21E-11    | 4.89E-06    | 4.05E-08   | 2.133845 | 1.115217 | 1.9175723 |
| mCHH_cis_Trisomy_2           | 1.25E-07    | 4.72E-05    | 9.53E-07   | 2.547358 | 1.26729  | 1.9040085 |
| mCHH_trans_Trisomy_2         | 1.89E-13    | 1.04E-07    | 1.31E-11   | 2.532559 | 1.337279 | 1.9150008 |
| mCHH_cis_Trisomy_3           | 1.14E-12    | 8.11E-09    | 7.87E-13   | 3.546331 | 5.644327 | 1.9787018 |

|                                                          |             |             |            |          |          |           |
|----------------------------------------------------------|-------------|-------------|------------|----------|----------|-----------|
| mCHH_trans_Trисomy_3                                     | 3.70E-24    | 7.37E-10    | 1.31E-28   | 3.294306 | 2.813201 | 1.8750682 |
| mCHH_cis_Trисomy_4                                       | 4.75E-07    | 0.000134919 | 0.00049028 | 1.918843 | 1.286527 | 1.6052633 |
| mCHH_trans_Trисomy_4                                     | 3.70E-24    | 8.35E-10    | 8.06E-18   | 1.759401 | 0.89935  | 1.6452341 |
| mCHH_cis_Trисomy_5                                       | 9.40E-08    | 1.83E-05    | 6.74E-05   | 2.673977 | 1.398906 | 2.1214135 |
| mCHH_trans_Trисomy_5                                     | 1.21E-12    | 3.90E-07    | 2.51E-06   | 1.872094 | 0.738948 | 1.935012  |
| UM_cis_Trисomy_1                                         | 3.70E-24    | 7.37E-10    | 4.02E-90   | 1.531293 | 1.174942 | 1.226524  |
| UM_trans_Trисomy_1                                       | 3.70E-24    | 7.37E-10    |            | 1.122168 | 0.795941 | 1.2054942 |
| UM_cis_Trисomy_2                                         | 3.70E-24    | 7.37E-10    | 3.11E-51   | 1.933521 | 1.468371 | 1.0914052 |
| UM_trans_Trисomy_2                                       | 3.70E-24    | 7.37E-10    | 0          | 1.371949 | 0.973155 | 1.0923989 |
| UM_cis_Trисomy_3                                         | 3.70E-24    | 7.37E-10    | 1.96E-63   | 1.67788  | 1.186195 | 1.2921859 |
| UM_trans_Trисomy_3                                       | 3.70E-24    | 7.37E-10    | 0          | 1.213117 | 0.788265 | 1.2939871 |
| UM_cis_Trисomy_4                                         | 3.70E-24    | 7.37E-10    | 1.24E-38   | 1.710183 | 1.232673 | 1.2707833 |
| UM_trans_Trисomy_4                                       | 3.70E-24    | 7.37E-10    | 0          | 1.297156 | 0.850898 | 1.2216325 |
| UM_cis_Trисomy_5                                         | 3.70E-24    | 7.37E-10    | 5.47E-143  | 1.829413 | 1.534832 | 1.1473903 |
| UM_trans_Trисomy_5                                       | 3.70E-24    | 7.37E-10    | 0          | 1.339147 | 1.019847 | 1.1435253 |
| Polycomb_cis_Trисomy_1                                   | 3.70E-24    | 3.77E-09    | 8.83E-19   | 1.939985 | 1.042532 | 1.7130369 |
| Polycomb_trans_Trисomy_1                                 | 3.70E-24    | 7.37E-10    | 3.23E-45   | 1.620228 | 0.710313 | 1.6890619 |
| Polycomb_cis_Trисomy_2                                   | 9.18E-20    | 1.09E-08    | 1.08E-13   | 2.611647 | 1.646661 | 1.5245675 |
| Polycomb_trans_Trисomy_2                                 | 3.70E-24    | 7.37E-10    | 3.57E-53   | 1.959357 | 1.095564 | 1.5399983 |
| Polycomb_cis_Trисomy_3                                   | 3.70E-24    | 7.37E-10    | 1.66E-23   | 2.517494 | 1.445542 | 1.729469  |
| Polycomb_trans_Trисomy_3                                 | 3.70E-24    | 7.37E-10    | 1.55E-72   | 1.854556 | 0.783893 | 1.8056203 |
| Polycomb_cis_Trисomy_4                                   | 1.56E-16    | 8.56E-08    | 9.53E-09   | 2.270619 | 1.438065 | 1.5522216 |
| Polycomb_trans_Trисomy_4                                 | 3.70E-24    | 7.37E-10    | 2.72E-64   | 2.0578   | 1.089694 | 1.6570485 |
| Polycomb_cis_Trисomy_5                                   | 2.05E-20    | 2.98E-08    | 3.56E-15   | 2.161518 | 1.336574 | 1.6573816 |
| Polycomb_trans_Trисomy_5                                 | 3.70E-24    | 7.37E-10    | 8.34E-52   | 1.767856 | 0.921154 | 1.6863278 |
| Trисomy_1_Cis_Transcription_Factors_tf_ratio             | 2.27E-05    | 0.000122728 | 0.0011569  | 1.194515 | 0.929341 | 1.2016677 |
| Trисomy_1_Cis_Transcription_Factors_target_ratio_cis     | 3.70E-24    | 7.37E-10    | 1.37E-17   | 1.330574 | 1.08191  | 1.188921  |
| Trисomy_1_Cis_Transcription_Factors_target_ratio_trans   | 3.70E-24    | 7.37E-10    | 2.17E-39   | 0.992833 | 0.729648 | 1.146517  |
| Trисomy_1_Trans_Transcription_Factors_tf_ratio           | 2.00E-05    | 0.000732772 | 0.0007123  | 0.991038 | 0.645359 | 1.2472222 |
| Trисomy_1_Trans_Transcription_Factors_target_ratio_cis   | 3.70E-24    | 7.37E-10    | 1.37E-42   | 1.427413 | 1.132866 | 1.1989477 |
| Trисomy_1_Trans_Transcription_Factors_target_ratio_trans | 3.70E-24    | 7.37E-10    | 1.77E-93   | 1.065427 | 0.75973  | 1.1711662 |
| Trисomy_2_Cis_Transcription_Factors_tf_ratio             | 0.137196994 | 0.110757669 | 0.04464875 | 2.001917 | 1.585726 | 1.0113936 |
| Trисomy_2_Cis_Transcription_Factors_target_ratio_cis     | 4.46E-12    | 4.12E-08    | 2.79E-07   | 1.912806 | 1.545739 | 1.0319194 |
| Trисomy_2_Cis_Transcription_Factors_target_ratio_trans   | 3.70E-24    | 7.37E-10    | 1.21E-24   | 1.479842 | 1.040482 | 1.0781876 |
| Trисomy_2_Trans_Transcription_Factors_tf_ratio           | 6.09E-08    | 2.54E-06    | 5.46E-07   | 1.295955 | 1.073418 | 0.9923722 |



|                                                          |             |             |            |          |          |           |
|----------------------------------------------------------|-------------|-------------|------------|----------|----------|-----------|
| Trisomy_2_Trans_Transcription_Factors_target_ratio_cis   | 3.70E-24    | 7.37E-10    | 1.71E-22   | 1.941644 | 1.503385 | 1.0145577 |
| Trisomy_2_Trans_Transcription_Factors_target_ratio_trans | 3.70E-24    | 7.37E-10    | 4.16E-123  | 1.326828 | 0.983165 | 1.0122359 |
| Trisomy_3_Cis_Transcription_Factors_tf_ratio             | 0.096695263 | 0.097005398 | 0.08260027 | 1.673019 | 1.183509 | 1.2938552 |
| Trisomy_3_Cis_Transcription_Factors_target_ratio_cis     | 0.001584239 | 0.014882533 | 0.01709439 | 2.195189 | 1.441388 | 1.3317289 |
| Trisomy_3_Cis_Transcription_Factors_target_ratio_trans   | 3.27E-19    | 7.37E-10    | 1.67E-13   | 1.447763 | 0.832099 | 1.4162275 |
| Trisomy_3_Trans_Transcription_Factors_tf_ratio           | 1.00E-06    | 0.000398046 | 4.75E-05   | 1.154072 | 0.734427 | 1.3056044 |
| Trisomy_3_Trans_Transcription_Factors_target_ratio_cis   | 3.70E-24    | 7.37E-10    | 1.80E-20   | 1.602917 | 1.186216 | 1.2716418 |
| Trisomy_3_Trans_Transcription_Factors_target_ratio_trans | 3.70E-24    | 7.37E-10    | 9.10E-109  | 1.151511 | 0.788024 | 1.2606385 |
| Trisomy_4_Cis_Transcription_Factors_tf_ratio             | 0.000554832 | 0.001943498 | 0.00958745 | 1.464741 | 1.193575 | 1.409924  |
| Trisomy_4_Cis_Transcription_Factors_target_ratio_cis     | 0.00401383  | 0.016182289 | 0.05707267 | 1.676518 | 1.062848 | 1.6626569 |
| Trisomy_4_Cis_Transcription_Factors_target_ratio_trans   | 0.000234093 | 0.008692551 | 0.02625757 | 1.41521  | 0.912739 | 1.3243262 |
| Trisomy_4_Trans_Transcription_Factors_tf_ratio           | 1.44E-08    | 2.62E-06    | 0.00028658 | 1.28155  | 0.95235  | 1.2432895 |
| Trisomy_4_Trans_Transcription_Factors_target_ratio_cis   | 3.70E-24    | 7.37E-10    | 7.78E-35   | 1.694876 | 1.256501 | 1.2219698 |
| Trisomy_4_Trans_Transcription_Factors_target_ratio_trans | 3.70E-24    | 7.37E-10    | 5.39E-140  | 1.235984 | 0.864183 | 1.1698697 |
| Trisomy_5_Cis_Transcription_Factors_tf_ratio             | 0.001116552 | 0.003211443 | 0.00851841 | 1.7861   | 1.555544 | 1.0808971 |
| Trisomy_5_Cis_Transcription_Factors_target_ratio_cis     | 3.70E-24    | 7.37E-10    | 1.59E-34   | 1.762539 | 1.502752 | 1.0506912 |
| Trisomy_5_Cis_Transcription_Factors_target_ratio_trans   | 3.70E-24    | 7.37E-10    | 2.02E-96   | 1.262223 | 1.016462 | 1.055751  |
| Trisomy_5_Trans_Transcription_Factors_tf_ratio           | 5.18E-11    | 2.96E-08    | 2.10E-06   | 1.369788 | 1.072911 | 1.1091193 |
| Trisomy_5_Trans_Transcription_Factors_target_ratio_cis   | 3.70E-24    | 7.37E-10    | 1.45E-31   | 1.742316 | 1.479534 | 1.1086647 |
| Trisomy_5_Trans_Transcription_Factors_target_ratio_trans | 3.70E-24    | 7.37E-10    | 1.01E-63   | 1.224976 | 0.971893 | 1.0779562 |
| Triploid_Transcription_Factors_tf_ratio                  | 3.70E-24    | 7.37E-10    | 3.83E-15   | 0.977705 | 0.867293 | 0.9448075 |
| Triploid_Transcription_Factors_target_ratio              | 3.70E-24    | 7.37E-10    | 0          | 0.988527 | 0.828387 | 0.9046364 |
| Tetraploid_Transcription_Factors_tf_ratio                | 1.89E-16    | 7.37E-10    | 8.62E-08   | 1.026708 | 0.85996  | 0.8376403 |
| Tetraploid_Transcription_Factors_target_ratio            | 3.70E-24    | 7.37E-10    | 0          | 1.057475 | 0.837248 | 0.8388352 |
| Yeast_Dis_I_cis                                          | 7.21E-10    | 5.74E-08    | 3.77E-07   | 1.712416 | 1.765699 | 0.3254309 |
| Yeast_Dis_I_trans                                        | 3.70E-24    | 7.37E-10    | 5.26E-24   | 0.998886 | 0.987869 | 0.1922454 |
| Yeast_Dis_II_cis                                         | 3.06E-14    | 5.43E-09    | 8.49E-07   | 1.895014 | 1.813204 | 0.388299  |
| Yeast_Dis_II_trans                                       | 3.70E-24    | 7.37E-10    | 1.43E-80   | 1.013353 | 0.967486 | 0.3166677 |
| Yeast_Dis_IV_cis                                         | 7.62E-15    | 2.51E-09    | 4.40E-09   | 1.868072 | 1.56248  | 0.6909974 |
| Yeast_Dis_IV_trans                                       | 3.70E-24    | 7.37E-10    | 5.95E-74   | 1.120435 | 0.884406 | 0.7611396 |
| Yeast_Dis_IX_cis                                         | 9.41E-11    | 1.81E-08    | 6.83E-08   | 1.918413 | 1.916351 | 0.3532452 |
| Yeast_Dis_IX_trans                                       | 3.70E-24    | 7.37E-10    | 9.49E-64   | 0.998315 | 0.972975 | 0.2639725 |
| Yeast_Dis_V_cis                                          | 0.002509259 | 0.003082293 | 0.00549406 | 1.987318 | 1.834892 | 0.5127748 |
| Yeast_Dis_V_trans                                        | 3.70E-24    | 7.37E-10    | 3.74E-30   | 1.0336   | 0.948954 | 0.4836115 |
| Yeast_Dis_VIII_cis                                       | 2.45E-09    | 8.83E-08    | 1.77E-08   | 1.864923 | 1.844914 | 0.2969303 |

|                        |             |             |            |          |          |           |
|------------------------|-------------|-------------|------------|----------|----------|-----------|
| Yeast_Dis_VIII_trans   | 3.70E-24    | 7.37E-10    | 6.37E-85   | 1.000021 | 0.979562 | 0.2648312 |
| Yeast_Dis_X_cis        | 3.70E-24    | 7.37E-10    | 4.64E-18   | 1.934673 | 1.931042 | 0.3970856 |
| Yeast_Dis_X_trans      | 3.70E-24    | 7.37E-10    | 9.51E-98   | 1.007916 | 0.9871   | 0.2735883 |
| Yeast_Dis_XI_cis       | 0.000424262 | 0.000966453 | 0.01899373 | 1.931544 | 1.839575 | 0.3647175 |
| Yeast_Dis_XI_trans     | 3.70E-24    | 7.37E-10    | 7.03E-35   | 1.011658 | 0.972642 | 0.3218835 |
| Yeast_Dis_XII_cis      | 2.31E-08    | 5.67E-07    | 0.00020647 | 1.838036 | 1.788631 | 0.4575377 |
| Yeast_Dis_XII_trans    | 3.70E-24    | 7.37E-10    | 1.18E-51   | 1.011187 | 0.960606 | 0.403115  |
| Yeast_Dis_XIII_cis     | 9.73E-23    | 7.37E-10    | 2.92E-13   | 1.888729 | 1.752125 | 0.4940698 |
| Yeast_Dis_XIII_trans   | 3.70E-24    | 7.37E-10    | 4.11E-118  | 1.037975 | 0.954409 | 0.4303913 |
| Yeast_Dis_XIV_cis      | 6.58E-08    | 2.65E-06    | 8.96E-06   | 1.878717 | 1.806492 | 0.3787014 |
| Yeast_Dis_XIV_trans    | 3.70E-24    | 7.37E-10    | 2.96E-113  | 1.022321 | 0.9619   | 0.4107544 |
| Yeast_Dis_XV_cis       | 4.04E-23    | 7.37E-10    | 2.36E-12   | 1.810885 | 1.706524 | 0.4857881 |
| Yeast_Dis_XV_trans     | 3.70E-24    | 7.37E-10    | 7.75E-68   | 1.026302 | 0.951956 | 0.4295167 |
| Yeast_Dis_XVI_cis      | 1.64E-17    | 7.37E-10    | 9.97E-07   | 1.838875 | 1.804634 | 0.3926011 |
| Yeast_Dis_XVI_trans    | 3.70E-24    | 7.37E-10    | 5.54E-45   | 1.0109   | 0.975308 | 0.3619804 |
| Yeast_WT               | 3.70E-24    | 7.37E-10    | 0          | 0.190691 | 0.166667 | 0.3679739 |
| Yeast_WT_pair_1        | 3.70E-24    | 7.37E-10    | 5.96E-35   | 1.031338 | 0.989359 | 0.4673288 |
| Yeast_WT_pair_2        | 3.70E-24    | 7.37E-10    | 6.17E-20   | 1.043022 | 0.993062 | 0.5107681 |
| Yeast_WT_pair_3        | 3.70E-24    | 7.37E-10    | 7.87E-108  | 1.018893 | 0.981604 | 0.38344   |
| Yeast_WT_pair_4        | 3.70E-24    | 7.37E-10    | 2.29E-25   | 1.01309  | 1.003743 | 0.2021272 |
| Yeast_WT_pair_5        | 3.70E-24    | 7.37E-10    | 3.13E-20   | 1.024936 | 0.992162 | 0.3242208 |
| Yeast_WT_pair_6        | 2.12E-08    | 0.000117802 | 3.69E-05   | 1.028155 | 0.995337 | 0.3568043 |
| Yeast_WT_all_pairs     | 3.70E-24    | 7.37E-10    | 1.71E-289  | 1.026457 | 0.993062 | 0.3857216 |
| Mouse_Trисomy_1_cis    | 3.70E-24    | 7.37E-10    | 3.47E-108  | 1.529357 | 1.092965 | 0.692359  |
| Mouse_Trисomy_1_trans  | 3.70E-24    | 7.37E-10    | 0          | 1.073263 | 1.007499 | 0.5236818 |
| Mouse_Trисomy_13_cis   | 3.70E-24    | 7.37E-10    | 3.07E-43   | 1.461906 | 1.215275 | 0.6161108 |
| Mouse_Trисomy_13_trans | 3.70E-24    | 7.37E-10    | 0          | 1.033302 | 1.026598 | 0.5983622 |
| Mouse_Trисomy_16_cis   | 3.70E-24    | 7.37E-10    | 2.72E-43   | 1.427779 | 1.179404 | 0.5480689 |
| Mouse_Trисomy_16_trans | 3.70E-24    | 7.37E-10    | 0          | 1.010858 | 1.004777 | 0.4385167 |
| Mouse_Trисomy_19_cis   | 3.70E-24    | 7.37E-10    | 1.20E-32   | 1.452217 | 1.264548 | 0.5022294 |
| Mouse_Trисomy_19_trans | 3.70E-24    | 7.37E-10    | 0          | 1.029444 | 1.023246 | 0.4084003 |

Table S2. Distribution comparisons with K-S tests. Ratio distributions were compared between those of various functional classes and all expressed genes or between different classes of methylated genes. The p-values are listed for the probability that the compared distributions are the same. The comparison are listed in the order of mention in the text.

| Comparison                                                                               | K-S p-value |
|------------------------------------------------------------------------------------------|-------------|
| Trans Trisomy 1 vs Triploid                                                              | 0           |
| Trans Trisomy 1 vs Tetraploid                                                            | 0           |
| Trans Trisomy 2 vs Triploid                                                              | 0           |
| Trans Trisomy 2 vs Tetraploid                                                            | 0           |
| Trans Trisomy 3 vs Triploid                                                              | 0           |
| Trans Trisomy 3 vs Tetraploid                                                            | 0           |
| Trans Trisomy 4 vs Triploid                                                              | 0           |
| Trans Trisomy 4 vs Tetraploid                                                            | 0           |
| Trans Trisomy 5 vs Triploid                                                              | 0           |
| Trans Trisomy 5 vs Tetraploid                                                            | 0           |
| Ratio distributions of all trans genes vs TranscriptionFactor trans genes for Trisomy 1  | 8.35E-09    |
| Ratio distributions of all trans genes vs TranscriptionFactor trans genes for Trisomy 2  | 1.70E-05    |
| Ratio distributions of all trans genes vs TranscriptionFactor trans genes for Trisomy 3  | 0.00013084  |
| Ratio distributions of all trans genes vs TranscriptionFactor trans genes for Trisomy 4  | 0           |
| Ratio distributions of all trans genes vs TranscriptionFactor trans genes for Trisomy 5  | 3.75E-06    |
| Ratio distributions of all trans genes vs SignalTransduction trans genes for Trisomy 1   | 0.188489303 |
| Ratio distributions of all trans genes vs SignalTransduction trans genes for Trisomy 2   | 0.002304772 |
| Ratio distributions of all trans genes vs SignalTransduction trans genes for Trisomy 3   | 0.332656055 |
| Ratio distributions of all trans genes vs SignalTransduction trans genes for Trisomy 4   | 0.080735224 |
| Ratio distributions of all trans genes vs SignalTransduction trans genes for Trisomy 5   | 0.247317708 |
| Ratio distributions of all trans genes vs Ribosomal structural trans genes for Trisomy 1 | 0           |
| Ratio distributions of all trans genes vs Ribosomal structural trans genes for Trisomy 2 | 1.26E-10    |
| Ratio distributions of all trans genes vs Ribosomal structural trans genes for Trisomy 3 | 1.69E-14    |
| Ratio distributions of all trans genes vs Ribosomal structural trans genes for Trisomy 4 | 9.51E-09    |
| Ratio distributions of all trans genes vs Ribosomal structural trans genes for Trisomy 5 | 1.94E-12    |
| Ratio distributions of all trans genes vs Proteasome trans genes for Trisomy 1           | 0.00050992  |
| Ratio distributions of all trans genes vs Proteasome trans genes for Trisomy 2           | 0.002833916 |
| Ratio distributions of all trans genes vs Proteasome trans genes for Trisomy 3           | 4.04E-05    |
| Ratio distributions of all trans genes vs Proteasome trans genes for Trisomy 4           | 0.000275721 |
| Ratio distributions of all trans genes vs Proteasome trans genes for Trisomy 5           | 3.63E-05    |
| Ratio distributions of all trans genes vs StressRelated trans genes for Trisomy 1        | 0.237108586 |
| Ratio distributions of all trans genes vs StressRelated trans genes for Trisomy 2        | 0.012383133 |
| Ratio distributions of all trans genes vs StressRelated trans genes for Trisomy 3        | 0.008542152 |
| Ratio distributions of all trans genes vs StressRelated trans genes for Trisomy 4        | 0.006627102 |
| Ratio distributions of all trans genes vs StressRelated trans genes for Trisomy 5        | 0.170974144 |
| Trans Trisomy 1 Plastid vs all trans genes                                               | 0           |
| Trans Trisomy 2 Plastid vs all trans genes                                               | 5.41E-14    |
| Trans Trisomy 3 Plastid vs all trans genes                                               | 0           |
| Trans Trisomy 4 Plastid vs all trans genes                                               | 3.79E-14    |
| Trans Trisomy 5 Plastid vs all trans genes                                               | 0           |
| Trans Trisomy 1 Mitochondria vs all trans genes                                          | 0           |
| Trans Trisomy 2 Mitochondria vs all trans genes                                          | 1.16E-13    |
| Trans Trisomy 3 Mitochondria vs all trans genes                                          | 3.43E-14    |
| Trans Trisomy 4 Mitochondria vs all trans genes                                          | 8.84E-14    |

|                                                 |             |
|-------------------------------------------------|-------------|
| Trans Trisomy 5 Mitochondria vs all trans genes | 0           |
| Trans Trisomy 1 Peroxisome vs all trans genes   | 9.27E-09    |
| Trans Trisomy 2 Peroxisome vs all trans genes   | 1.31E-07    |
| Trans Trisomy 3 Peroxisome vs all trans genes   | 3.92E-10    |
| Trans Trisomy 4 Peroxisome vs all trans genes   | 8.52E-10    |
| Trans Trisomy 5 Peroxisome vs all trans genes   | 2.22E-16    |
| cis_gbm vs um_trisomy1                          | 5.55E-16    |
| trans_gbm vs um_trisomy1                        | 0           |
| cis_gbm vs um_trisomy2                          | 7.58E-09    |
| trans_gbm vs um_trisomy2                        | 0           |
| cis_gbm vs um_trisomy3                          | 0           |
| trans_gbm vs um_trisomy3                        | 0           |
| cis_gbm vs um_trisomy4                          | 0.00296946  |
| trans_gbm vs um_trisomy4                        | 3.77E-15    |
| cis_gbm vs um_trisomy5                          | 1.16E-11    |
| trans_gbm vs um_trisomy5                        | 0           |
| Trisomy1_trans_UM_vs_all trans genes            | 0           |
| Trisomy1_trans_gbM_vs_all trans genes           | 0           |
| Trisomy1_trans_mCHH_vs_all trans genes          | 0.000295846 |
| Trisomy1_trans_mCHG_vs_all trans genes          | 0.425121572 |
| Trisomy2_trans_UM_vs_all trans genes            | 0           |
| Trisomy2_trans_gbM_vs_all trans genes           | 0           |
| Trisomy2_trans_mCHH_vs_all trans genes          | 1.02E-06    |
| Trisomy2_trans_mCHG_vs_all trans genes          | 0.538396078 |
| trisomy3_trans_UM_vs_all trans genes            | 0           |
| Trisomy3_trans_gbM_vs_all trans genes           | 0           |
| Trisomy3_trans_mCHH_vs_all trans genes          | 1.26E-06    |
| Trisomy3_trans_mCHG_vs_all trans genes          | 0.010336338 |
| Trisomy4_trans_UM_vs_all trans genes            | 0           |
| Trisomy4_trans_gbM_vs_all trans genes           | 1.22E-15    |
| Trisomy4_trans_mCHH_vs_all trans genes          | 0           |
| Trisomy4_trans_mCHG_vs_all trans genes          | 0.006196943 |
| trisomy5_trans_UM_vs_all trans genes            | 0           |
| Trisomy5_trans_gbM_vs_all trans genes           | 0           |
| trisomy5_trans_mCHH_vs_all trans genes          | 1.91E-09    |
| Trisomy5_trans_mCHG_vs_all trans genes          | 0.02273897  |

Table S3. Comparisons of distribution variances with Bartlett's test. The variances of ratio distributions were compared between those of various functional classes and all expressed genes or between different classes of methylated genes. The p-values are listed for the probability that the compared variances are the same. The categories are listed in the order of mention in the text.

| Category                                          | Bartlett's p-value |
|---------------------------------------------------|--------------------|
| all trisomies vs triploid                         | 0                  |
| all trisomies vs tetraploid                       | 0                  |
| all trisomies vs all ploidy                       | 0                  |
| all trisomies trans ribosome vs trans all genes   | 1.6058E-156        |
| all trisomies cis ribosome vs cis all genes       | 1.36856E-32        |
| all trisomies trans proteasome vs trans all genes | 5.553E-38          |
| all trisomies cis proteasome vs cis all genes     | 1.77527E-14        |
| all ploidies proteasome vs all genes              | 3.65236E-08        |
| all ploidies ribosome vs all genes                | 3.0444E-204        |
| all trisomies cis gbm vs um                       | 3.6208E-155        |
| all trisomies trans gbm vs um                     | 0                  |
| all yeast disomics cis vs control avg             | 0                  |
| all yeast disomics trans vs control avg           | 0                  |
| all yeast disomics cis vs control pairwise        | 0                  |
| all yeast disomics trans vs control pairwise      | 0                  |

Table S4. GO term enrichment analyses on the outlier genes in ratio distributions of each trisomic and ploidy comparison. Analyses are described in Materials and Methods.



| Analysis Type: PANTHER Overrepresentation Test (Released 2017-12-05)          |                 |             |          |            |                 |             |          |
|-------------------------------------------------------------------------------|-----------------|-------------|----------|------------|-----------------|-------------|----------|
| Annotation Version and Release Date: GO Ontology database Released 2018-05-21 |                 |             |          |            |                 |             |          |
| Analyzed List: Trisomy1_outliers (Arabidopsis thaliana)                       |                 |             |          |            |                 |             |          |
| Reference List: Arabidopsis thaliana (all genes in database)                  |                 |             |          |            |                 |             |          |
| Test Type: FISHER                                                             |                 |             |          |            |                 |             |          |
| GO biological process complete                                                | REFLIST (27502) | Input(2633) | expected | over/under | fold Enrichment | raw P-value | FDR      |
| fruit ripening (GO:0009835)                                                   | 13              | 8           | 1.24     | +          | 6.43            | 2.42E-04    | 1.04E-02 |
| isoprenoid catabolic process (GO:0008300)                                     | 24              | 11          | 2.3      | +          | 4.79            | 1.28E-04    | 6.25E-03 |
| response to chitin (GO:0010200)                                               | 137             | 38          | 13.12    | +          | 2.9             | 1.24E-07    | 1.98E-05 |
| circadian rhythm (GO:0007623)                                                 | 105             | 25          | 10.05    | +          | 2.49            | 2.29E-04    | 1.00E-02 |
| aging (GO:0007568)                                                            | 154             | 35          | 14.74    | +          | 2.37            | 2.24E-05    | 1.57E-03 |
| hydrogen peroxide catabolic process (GO:0042744)                              | 95              | 21          | 9.1      | +          | 2.31            | 1.33E-03    | 4.26E-02 |
| antibiotic catabolic process (GO:0017001)                                     | 100             | 22          | 9.57     | +          | 2.3             | 1.02E-03    | 3.47E-02 |
| rhythmic process (GO:0048511)                                                 | 124             | 27          | 11.87    | +          | 2.27            | 3.86E-04    | 1.49E-02 |
| phenylpropanoid biosynthetic process (GO:0009699)                             | 129             | 27          | 12.35    | +          | 2.19            | 5.38E-04    | 2.00E-02 |
| phenylpropanoid metabolic process (GO:0009698)                                | 168             | 35          | 16.08    | +          | 2.18            | 9.04E-05    | 4.77E-03 |
| ethylene-activated signaling pathway (GO:0009873)                             | 180             | 37          | 17.23    | +          | 2.15            | 8.51E-05    | 4.66E-03 |
| cellular response to ethylene stimulus (GO:0071369)                           | 200             | 40          | 19.15    | +          | 2.09            | 7.39E-05    | 4.20E-03 |
| hormone biosynthetic process (GO:0042446)                                     | 193             | 38          | 18.48    | +          | 2.06            | 1.46E-04    | 6.99E-03 |
| response to organonitrogen compound (GO:0010243)                              | 230             | 44          | 22.02    | +          | 2               | 8.73E-05    | 4.73E-03 |
| response to cold (GO:0009409)                                                 | 411             | 77          | 39.35    | +          | 1.96            | 3.95E-07    | 5.44E-05 |
| secondary metabolic process (GO:0019748)                                      | 521             | 97          | 49.88    | +          | 1.94            | 1.41E-08    | 3.34E-06 |
| response to ethylene (GO:0009723)                                             | 305             | 56          | 29.2     | +          | 1.92            | 2.97E-05    | 1.95E-03 |
| response to salicylic acid (GO:0009751)                                       | 202             | 37          | 19.34    | +          | 1.91            | 7.29E-04    | 2.57E-02 |
| response to drug (GO:0042493)                                                 | 583             | 104         | 55.82    | +          | 1.86            | 3.34E-08    | 6.37E-06 |
| hormone metabolic process (GO:0042445)                                        | 267             | 47          | 25.56    | +          | 1.84            | 2.65E-04    | 1.14E-02 |
| phosphorelay signal transduction system (GO:0000160)                          | 224             | 39          | 21.45    | +          | 1.82            | 1.30E-03    | 4.19E-02 |
| secondary metabolite biosynthetic process (GO:0044550)                        | 337             | 58          | 32.26    | +          | 1.8             | 9.92E-05    | 5.15E-03 |
| response to antibiotic (GO:0046677)                                           | 297             | 49          | 28.43    | +          | 1.72            | 7.47E-04    | 2.61E-02 |
| response to nitrogen compound (GO:1901698)                                    | 348             | 57          | 33.32    | +          | 1.71            | 3.57E-04    | 1.43E-02 |
| regulation of transcription by RNA polymerase II (GO:0006357)                 | 501             | 81          | 47.96    | +          | 1.69            | 2.95E-05    | 1.96E-03 |
| response to oxidative stress (GO:0006979)                                     | 475             | 74          | 45.48    | +          | 1.63            | 1.75E-04    | 7.91E-03 |
| response to temperature stimulus (GO:0009266)                                 | 601             | 93          | 57.54    | +          | 1.62            | 4.05E-05    | 2.58E-03 |
| defense response to fungus (GO:0050832)                                       | 488             | 73          | 46.72    | +          | 1.56            | 6.42E-04    | 2.34E-02 |
| nucleic acid-templated transcription (GO:0097659)                             | 1888            | 268         | 180.75   | +          | 1.48            | 2.00E-09    | 6.97E-07 |

|                                                                             |       |      |        |   |      |          |          |
|-----------------------------------------------------------------------------|-------|------|--------|---|------|----------|----------|
| transcription, DNA-templated (GO:0006351)                                   | 1888  | 268  | 180.75 | + | 1.48 | 2.00E-09 | 6.58E-07 |
| response to fungus (GO:0009620)                                             | 571   | 81   | 54.67  | + | 1.48 | 1.23E-03 | 4.02E-02 |
| RNA biosynthetic process (GO:0032774)                                       | 1893  | 268  | 181.23 | + | 1.48 | 2.65E-09 | 7.82E-07 |
| response to oxygen-containing compound (GO:1901700)                         | 1594  | 219  | 152.61 | + | 1.44 | 7.47E-07 | 9.01E-05 |
| response to acid chemical (GO:0001101)                                      | 1186  | 160  | 113.55 | + | 1.41 | 6.07E-05 | 3.52E-03 |
| regulation of transcription, DNA-templated (GO:0006355)                     | 2491  | 317  | 238.48 | + | 1.33 | 1.22E-06 | 1.34E-04 |
| regulation of RNA biosynthetic process (GO:2001141)                         | 2493  | 317  | 238.68 | + | 1.33 | 1.24E-06 | 1.33E-04 |
| regulation of nucleic acid-templated transcription (GO:1903506)             | 2493  | 317  | 238.68 | + | 1.33 | 1.24E-06 | 1.31E-04 |
| defense response (GO:0006952)                                               | 1583  | 200  | 151.55 | + | 1.32 | 2.32E-04 | 1.01E-02 |
| response to hormone (GO:0009725)                                            | 1815  | 229  | 173.77 | + | 1.32 | 8.08E-05 | 4.46E-03 |
| response to endogenous stimulus (GO:0009719)                                | 1823  | 229  | 174.53 | + | 1.31 | 9.88E-05 | 5.17E-03 |
| nucleobase-containing compound biosynthetic process (GO:0034654)            | 2210  | 273  | 211.58 | + | 1.29 | 5.18E-05 | 3.10E-03 |
| organic cyclic compound biosynthetic process (GO:1901362)                   | 2660  | 327  | 254.66 | + | 1.28 | 1.21E-05 | 9.32E-04 |
| aromatic compound biosynthetic process (GO:0019438)                         | 2531  | 311  | 242.31 | + | 1.28 | 2.34E-05 | 1.61E-03 |
| regulation of RNA metabolic process (GO:0051252)                            | 2619  | 321  | 250.74 | + | 1.28 | 1.96E-05 | 1.40E-03 |
| response to organic substance (GO:0010033)                                  | 2151  | 263  | 205.93 | + | 1.28 | 1.45E-04 | 6.95E-03 |
| heterocycle biosynthetic process (GO:0018130)                               | 2432  | 292  | 232.84 | + | 1.25 | 1.85E-04 | 8.27E-03 |
| regulation of cellular macromolecule biosynthetic process (GO:2000112)      | 2677  | 321  | 256.29 | + | 1.25 | 8.74E-05 | 4.70E-03 |
| regulation of cellular biosynthetic process (GO:0031326)                    | 2773  | 332  | 265.48 | + | 1.25 | 7.38E-05 | 4.24E-03 |
| regulation of macromolecule biosynthetic process (GO:0010556)               | 2687  | 321  | 257.25 | + | 1.25 | 1.18E-04 | 5.93E-03 |
| regulation of nucleobase-containing compound metabolic process (GO:0019219) | 2700  | 322  | 258.49 | + | 1.25 | 1.23E-04 | 6.09E-03 |
| regulation of biosynthetic process (GO:0009889)                             | 2795  | 333  | 267.59 | + | 1.24 | 1.03E-04 | 5.29E-03 |
| response to abiotic stimulus (GO:0009628)                                   | 2082  | 248  | 199.33 | + | 1.24 | 1.01E-03 | 3.47E-02 |
| response to chemical (GO:0042221)                                           | 3014  | 359  | 288.56 | + | 1.24 | 5.15E-05 | 3.14E-03 |
| response to stress (GO:0006950)                                             | 3635  | 429  | 348.01 | + | 1.23 | 1.67E-05 | 1.24E-03 |
| regulation of gene expression (GO:0010468)                                  | 2913  | 335  | 278.89 | + | 1.2  | 9.95E-04 | 3.44E-02 |
| response to stimulus (GO:0050896)                                           | 6446  | 705  | 617.13 | + | 1.14 | 1.51E-04 | 7.01E-03 |
| primary metabolic process (GO:0044238)                                      | 9223  | 797  | 883    | - | 0.9  | 6.73E-04 | 2.38E-02 |
| cellular process (GO:0009987)                                               | 12555 | 1068 | 1202   | - | 0.89 | 5.07E-07 | 6.66E-05 |
| cellular metabolic process (GO:0044237)                                     | 9524  | 807  | 911.81 | - | 0.89 | 3.66E-05 | 2.38E-03 |
| macromolecule metabolic process (GO:0043170)                                | 7271  | 612  | 696.11 | - | 0.88 | 3.49E-04 | 1.41E-02 |

|                                                               |      |     |        |   |      |          |          |
|---------------------------------------------------------------|------|-----|--------|---|------|----------|----------|
| nucleobase-containing compound metabolic process (GO:0006139) | 3878 | 313 | 371.27 | - | 0.84 | 1.60E-03 | 4.93E-02 |
| nitrogen compound metabolic process (GO:0006807)              | 8015 | 634 | 767.34 | - | 0.83 | 2.82E-08 | 5.75E-06 |
| cellular nitrogen compound metabolic process (GO:0034641)     | 4767 | 364 | 456.39 | - | 0.8  | 3.00E-06 | 2.73E-04 |
| transport (GO:0006810)                                        | 2455 | 185 | 235.04 | - | 0.79 | 7.86E-04 | 2.74E-02 |
| establishment of localization (GO:0051234)                    | 2500 | 187 | 239.35 | - | 0.78 | 5.10E-04 | 1.91E-02 |
| localization (GO:0051179)                                     | 2633 | 196 | 252.08 | - | 0.78 | 2.71E-04 | 1.15E-02 |
| protein modification process (GO:0036211)                     | 2360 | 174 | 225.94 | - | 0.77 | 3.61E-04 | 1.42E-02 |
| cellular protein modification process (GO:0006464)            | 2360 | 174 | 225.94 | - | 0.77 | 3.61E-04 | 1.41E-02 |
| organonitrogen compound metabolic process (GO:1901564)        | 4900 | 348 | 469.12 | - | 0.74 | 9.66E-10 | 4.76E-07 |
| protein metabolic process (GO:0019538)                        | 3702 | 257 | 354.42 | - | 0.73 | 3.11E-08 | 6.13E-06 |
| phosphorylation (GO:0016310)                                  | 1283 | 87  | 122.83 | - | 0.71 | 1.02E-03 | 3.48E-02 |
| cellular component organization (GO:0016043)                  | 2799 | 183 | 267.97 | - | 0.68 | 3.58E-08 | 6.61E-06 |
| cellular protein metabolic process (GO:0044267)               | 3337 | 218 | 319.48 | - | 0.68 | 1.16E-09 | 5.29E-07 |
| macromolecule modification (GO:0043412)                       | 2842 | 182 | 272.09 | - | 0.67 | 5.94E-09 | 1.60E-06 |
| phosphorus metabolic process (GO:0006793)                     | 1917 | 122 | 183.53 | - | 0.66 | 1.93E-06 | 1.91E-04 |
| phosphate-containing compound metabolic process (GO:0006796)  | 1844 | 116 | 176.54 | - | 0.66 | 1.87E-06 | 1.87E-04 |
| macromolecule localization (GO:0033036)                       | 1134 | 69  | 108.57 | - | 0.64 | 8.94E-05 | 4.76E-03 |
| cellular component organization or biogenesis (GO:0071840)    | 3161 | 192 | 302.63 | - | 0.63 | 6.62E-12 | 7.83E-09 |
| nitrogen compound transport (GO:0071705)                      | 1052 | 60  | 100.72 | - | 0.6  | 2.31E-05 | 1.61E-03 |
| embryo development ending in seed dormancy (GO:0009793)       | 557  | 28  | 53.33  | - | 0.53 | 3.59E-04 | 1.43E-02 |
| cellular component biogenesis (GO:0044085)                    | 1309 | 65  | 125.32 | - | 0.52 | 8.81E-09 | 2.26E-06 |
| amide transport (GO:0042886)                                  | 837  | 41  | 80.13  | - | 0.51 | 3.63E-06 | 3.21E-04 |
| embryo development (GO:0009790)                               | 574  | 28  | 54.95  | - | 0.51 | 1.40E-04 | 6.79E-03 |
| peptide transport (GO:0015833)                                | 822  | 40  | 78.7   | - | 0.51 | 3.96E-06 | 3.44E-04 |
| vesicle-mediated transport (GO:0016192)                       | 499  | 24  | 47.77  | - | 0.5  | 3.11E-04 | 1.29E-02 |
| ubiquitin-dependent protein catabolic process (GO:0006511)    | 460  | 22  | 44.04  | - | 0.5  | 5.93E-04 | 2.19E-02 |
| organonitrogen compound biosynthetic process (GO:1901566)     | 1571 | 72  | 150.41 | - | 0.48 | 3.34E-12 | 4.94E-09 |
| cell cycle (GO:0007049)                                       | 568  | 26  | 54.38  | - | 0.48 | 4.92E-05 | 3.09E-03 |
| cellular localization (GO:0051641)                            | 918  | 41  | 87.89  | - | 0.47 | 7.45E-08 | 1.30E-05 |
| cellular component assembly (GO:0022607)                      | 788  | 35  | 75.44  | - | 0.46 | 6.45E-07 | 8.11E-05 |
| organelle organization (GO:0006996)                           | 1645 | 73  | 157.49 | - | 0.46 | 1.91E-13 | 5.63E-10 |
| establishment of localization in cell (GO:0051649)            | 740  | 32  | 70.85  | - | 0.45 | 7.75E-07 | 9.17E-05 |
| protein transport (GO:0015031)                                | 763  | 32  | 73.05  | - | 0.44 | 2.10E-07 | 3.10E-05 |

|                                                                                                   |     |    |       |   |      |          |          |
|---------------------------------------------------------------------------------------------------|-----|----|-------|---|------|----------|----------|
| chromatin organization (GO:0006325)                                                               | 361 | 15 | 34.56 | - | 0.43 | 4.43E-04 | 1.69E-02 |
| establishment of protein localization (GO:0045184)                                                | 771 | 32 | 73.81 | - | 0.43 | 1.65E-07 | 2.50E-05 |
| intracellular transport (GO:0046907)                                                              | 699 | 29 | 66.92 | - | 0.43 | 5.33E-07 | 6.85E-05 |
| proteasomal protein catabolic process (GO:0010498)                                                | 296 | 12 | 28.34 | - | 0.42 | 1.52E-03 | 4.70E-02 |
| cellular amide metabolic process (GO:0043603)                                                     | 820 | 33 | 78.51 | - | 0.42 | 2.41E-08 | 5.28E-06 |
| peptide metabolic process (GO:0006518)                                                            | 726 | 29 | 69.51 | - | 0.42 | 1.41E-07 | 2.20E-05 |
| intracellular protein transport (GO:0006886)                                                      | 560 | 22 | 53.61 | - | 0.41 | 3.57E-06 | 3.20E-04 |
| protein localization (GO:0008104)                                                                 | 847 | 33 | 81.09 | - | 0.41 | 4.69E-09 | 1.32E-06 |
| protein-containing complex subunit organization (GO:0043933)                                      | 645 | 25 | 61.75 | - | 0.4  | 3.61E-07 | 5.08E-05 |
| proteasome-mediated ubiquitin-dependent protein catabolic process (GO:0043161)                    | 284 | 11 | 27.19 | - | 0.4  | 1.20E-03 | 3.95E-02 |
| protein-containing complex assembly (GO:0065003)                                                  | 554 | 21 | 53.04 | - | 0.4  | 2.13E-06 | 2.00E-04 |
| cellular macromolecule localization (GO:0070727)                                                  | 688 | 26 | 65.87 | - | 0.39 | 8.98E-08 | 1.52E-05 |
| organophosphate metabolic process (GO:0019637)                                                    | 610 | 23 | 58.4  | - | 0.39 | 5.06E-07 | 6.80E-05 |
| chromosome organization (GO:0051276)                                                              | 544 | 20 | 52.08 | - | 0.38 | 1.21E-06 | 1.35E-04 |
| cellular protein localization (GO:0034613)                                                        | 655 | 24 | 62.71 | - | 0.38 | 9.23E-08 | 1.52E-05 |
| cellular protein-containing complex assembly (GO:0034622)                                         | 508 | 18 | 48.64 | - | 0.37 | 1.63E-06 | 1.66E-04 |
| generation of precursor metabolites and energy (GO:0006091)                                       | 369 | 13 | 35.33 | - | 0.37 | 5.14E-05 | 3.17E-03 |
| mRNA metabolic process (GO:0016071)                                                               | 523 | 18 | 50.07 | - | 0.36 | 6.88E-07 | 8.48E-05 |
| photosynthesis (GO:0015979)                                                                       | 235 | 8  | 22.5  | - | 0.36 | 1.26E-03 | 4.06E-02 |
| coenzyme metabolic process (GO:0006732)                                                           | 324 | 11 | 31.02 | - | 0.35 | 1.25E-04 | 6.16E-03 |
| mitotic cell cycle (GO:0000278)                                                                   | 268 | 9  | 25.66 | - | 0.35 | 3.84E-04 | 1.49E-02 |
| organophosphate biosynthetic process (GO:0090407)                                                 | 402 | 13 | 38.49 | - | 0.34 | 6.56E-06 | 5.39E-04 |
| RNA splicing, via transesterification reactions with bulged adenosine as nucleophile (GO:0000377) | 201 | 6  | 19.24 | - | 0.31 | 1.19E-03 | 3.97E-02 |
| RNA splicing, via transesterification reactions (GO:0000375)                                      | 201 | 6  | 19.24 | - | 0.31 | 1.19E-03 | 3.94E-02 |
| amide biosynthetic process (GO:0043604)                                                           | 687 | 20 | 65.77 | - | 0.3  | 2.18E-10 | 1.17E-07 |
| translation (GO:0006412)                                                                          | 620 | 18 | 59.36 | - | 0.3  | 1.66E-09 | 6.15E-07 |
| peptide biosynthetic process (GO:0043043)                                                         | 625 | 18 | 59.84 | - | 0.3  | 1.22E-09 | 5.16E-07 |
| establishment of protein localization to organelle (GO:0072594)                                   | 246 | 7  | 23.55 | - | 0.3  | 1.93E-04 | 8.58E-03 |
| ribonucleoprotein complex assembly (GO:0022618)                                                   | 212 | 6  | 20.3  | - | 0.3  | 6.43E-04 | 2.33E-02 |
| mRNA processing (GO:0006397)                                                                      | 393 | 11 | 37.63 | - | 0.29 | 1.27E-06 | 1.31E-04 |
| ribonucleoprotein complex subunit organization (GO:0071826)                                       | 221 | 6  | 21.16 | - | 0.28 | 3.39E-04 | 1.37E-02 |

|                                                                        |     |    |       |   |      |          |          |
|------------------------------------------------------------------------|-----|----|-------|---|------|----------|----------|
| protein localization to organelle (GO:0033365)                         | 299 | 8  | 28.63 | - | 0.28 | 2.39E-05 | 1.62E-03 |
| cellular response to DNA damage stimulus (GO:0006974)                  | 351 | 9  | 33.6  | - | 0.27 | 1.96E-06 | 1.90E-04 |
| organelle fission (GO:0048285)                                         | 201 | 5  | 19.24 | - | 0.26 | 4.33E-04 | 1.66E-02 |
| RNA splicing (GO:0008380)                                              | 285 | 7  | 27.29 | - | 0.26 | 1.49E-05 | 1.12E-03 |
| nucleobase-containing small molecule metabolic process (GO:0055086)    | 462 | 11 | 44.23 | - | 0.25 | 1.43E-08 | 3.26E-06 |
| RNA processing (GO:0006396)                                            | 819 | 19 | 78.41 | - | 0.24 | 8.60E-15 | 5.08E-11 |
| organelle assembly (GO:0070925)                                        | 217 | 5  | 20.78 | - | 0.24 | 1.12E-04 | 5.72E-03 |
| DNA metabolic process (GO:0006259)                                     | 537 | 12 | 51.41 | - | 0.23 | 2.17E-10 | 1.29E-07 |
| cofactor biosynthetic process (GO:0051188)                             | 292 | 6  | 27.96 | - | 0.21 | 2.38E-06 | 2.20E-04 |
| nucleobase-containing compound transport (GO:0015931)                  | 147 | 3  | 14.07 | - | 0.21 | 1.22E-03 | 4.00E-02 |
| DNA replication (GO:0006260)                                           | 148 | 3  | 14.17 | - | 0.21 | 1.23E-03 | 4.00E-02 |
| DNA recombination (GO:0006310)                                         | 155 | 3  | 14.84 | - | 0.2  | 6.05E-04 | 2.22E-02 |
| DNA repair (GO:0006281)                                                | 322 | 6  | 30.83 | - | 0.19 | 3.18E-07 | 4.58E-05 |
| coenzyme biosynthetic process (GO:0009108)                             | 230 | 4  | 22.02 | - | 0.18 | 1.18E-05 | 9.18E-04 |
| purine-containing compound biosynthetic process (GO:0072522)           | 175 | 3  | 16.75 | - | 0.18 | 1.50E-04 | 7.02E-03 |
| tRNA metabolic process (GO:0006399)                                    | 176 | 3  | 16.85 | - | 0.18 | 1.52E-04 | 7.01E-03 |
| ribonucleoprotein complex biogenesis (GO:0022613)                      | 532 | 9  | 50.93 | - | 0.18 | 3.27E-12 | 6.45E-09 |
| peptidyl-lysine modification (GO:0018205)                              | 124 | 2  | 11.87 | - | 0.17 | 1.38E-03 | 4.38E-02 |
| pyridine nucleotide metabolic process (GO:0019362)                     | 124 | 2  | 11.87 | - | 0.17 | 1.38E-03 | 4.36E-02 |
| photosynthesis, light reaction (GO:0019684)                            | 125 | 2  | 11.97 | - | 0.17 | 1.38E-03 | 4.35E-02 |
| RNA modification (GO:0009451)                                          | 441 | 7  | 42.22 | - | 0.17 | 1.84E-10 | 1.21E-07 |
| nucleobase-containing small molecule biosynthetic process (GO:0034404) | 126 | 2  | 12.06 | - | 0.17 | 1.40E-03 | 4.38E-02 |
| purine ribonucleoside monophosphate metabolic process (GO:0009167)     | 190 | 3  | 18.19 | - | 0.16 | 5.24E-05 | 3.10E-03 |
| purine nucleoside monophosphate metabolic process (GO:0009126)         | 190 | 3  | 18.19 | - | 0.16 | 5.24E-05 | 3.07E-03 |
| purine-containing compound metabolic process (GO:0072521)              | 261 | 4  | 24.99 | - | 0.16 | 9.66E-07 | 1.12E-04 |
| pyridine-containing compound metabolic process (GO:0072524)            | 133 | 2  | 12.73 | - | 0.16 | 6.69E-04 | 2.40E-02 |
| ribonucleoside monophosphate metabolic process (GO:0009161)            | 207 | 3  | 19.82 | - | 0.15 | 1.22E-05 | 9.22E-04 |
| purine ribonucleoside monophosphate biosynthetic process (GO:0009168)  | 139 | 2  | 13.31 | - | 0.15 | 4.67E-04 | 1.77E-02 |
| purine nucleoside monophosphate biosynthetic process (GO:0009127)      | 139 | 2  | 13.31 | - | 0.15 | 4.67E-04 | 1.76E-02 |
| nucleoside monophosphate metabolic process (GO:0009123)                | 214 | 3  | 20.49 | - | 0.15 | 8.87E-06 | 7.09E-04 |
| oxidoreduction coenzyme metabolic process (GO:0006733)                 | 144 | 2  | 13.79 | - | 0.15 | 3.26E-04 | 1.34E-02 |
| nucleotide biosynthetic process (GO:0009165)                           | 219 | 3  | 20.97 | - | 0.14 | 6.25E-06 | 5.21E-04 |
| ribosome biogenesis (GO:0042254)                                       | 440 | 6  | 42.12 | - | 0.14 | 2.83E-11 | 2.39E-08 |

|                                                                      |     |   |       |   |      |          |          |
|----------------------------------------------------------------------|-----|---|-------|---|------|----------|----------|
| nucleoside phosphate biosynthetic process (GO:1901293)               | 221 | 3 | 21.16 | - | 0.14 | 4.10E-06 | 3.51E-04 |
| purine ribonucleotide metabolic process (GO:0009150)                 | 221 | 3 | 21.16 | - | 0.14 | 4.10E-06 | 3.46E-04 |
| purine nucleotide metabolic process (GO:0006163)                     | 230 | 3 | 22.02 | - | 0.14 | 1.97E-06 | 1.88E-04 |
| ribonucleoside monophosphate biosynthetic process (GO:0009156)       | 155 | 2 | 14.84 | - | 0.13 | 1.63E-04 | 7.40E-03 |
| purine ribonucleotide biosynthetic process (GO:0009152)              | 160 | 2 | 15.32 | - | 0.13 | 1.14E-04 | 5.77E-03 |
| ribonucleotide metabolic process (GO:0009259)                        | 241 | 3 | 23.07 | - | 0.13 | 9.78E-07 | 1.11E-04 |
| nucleoside monophosphate biosynthetic process (GO:0009124)           | 162 | 2 | 15.51 | - | 0.13 | 7.46E-05 | 4.20E-03 |
| ATP metabolic process (GO:0046034)                                   | 163 | 2 | 15.61 | - | 0.13 | 7.57E-05 | 4.22E-03 |
| purine nucleotide biosynthetic process (GO:0006164)                  | 166 | 2 | 15.89 | - | 0.13 | 5.13E-05 | 3.20E-03 |
| macromolecule methylation (GO:0043414)                               | 167 | 2 | 15.99 | - | 0.13 | 5.18E-05 | 3.13E-03 |
| ncRNA metabolic process (GO:0034660)                                 | 421 | 5 | 40.31 | - | 0.12 | 1.77E-11 | 1.75E-08 |
| nucleotide metabolic process (GO:0009117)                            | 342 | 4 | 32.74 | - | 0.12 | 2.08E-09 | 6.47E-07 |
| nucleoside phosphate metabolic process (GO:0006753)                  | 346 | 4 | 33.13 | - | 0.12 | 1.41E-09 | 5.55E-07 |
| purine ribonucleoside triphosphate metabolic process (GO:0009205)    | 173 | 2 | 16.56 | - | 0.12 | 3.68E-05 | 2.37E-03 |
| purine nucleoside triphosphate metabolic process (GO:0009144)        | 176 | 2 | 16.85 | - | 0.12 | 2.46E-05 | 1.65E-03 |
| ribonucleotide biosynthetic process (GO:0009260)                     | 179 | 2 | 17.14 | - | 0.12 | 1.68E-05 | 1.23E-03 |
| ribonucleoside triphosphate metabolic process (GO:0009199)           | 181 | 2 | 17.33 | - | 0.12 | 1.71E-05 | 1.23E-03 |
| ribose phosphate metabolic process (GO:0019693)                      | 275 | 3 | 26.33 | - | 0.11 | 4.86E-08 | 8.71E-06 |
| ribose phosphate biosynthetic process (GO:0046390)                   | 184 | 2 | 17.62 | - | 0.11 | 1.16E-05 | 9.13E-04 |
| nucleoside triphosphate metabolic process (GO:0009141)               | 191 | 2 | 18.29 | - | 0.11 | 8.24E-06 | 6.68E-04 |
| tRNA processing (GO:0008033)                                         | 104 | 1 | 9.96  | - | 0.1  | 1.44E-03 | 4.47E-02 |
| ATP biosynthetic process (GO:0006754)                                | 112 | 1 | 10.72 | - | 0.09 | 6.61E-04 | 2.38E-02 |
| double-strand break repair (GO:0006302)                              | 113 | 1 | 10.82 | - | 0.09 | 6.70E-04 | 2.38E-02 |
| ncRNA processing (GO:0034470)                                        | 343 | 3 | 32.84 | - | 0.09 | 1.70E-10 | 1.26E-07 |
| purine ribonucleoside triphosphate biosynthetic process (GO:0009206) | 120 | 1 | 11.49 | - | 0.09 | 3.07E-04 | 1.30E-02 |
| purine nucleoside triphosphate biosynthetic process (GO:0009145)     | 120 | 1 | 11.49 | - | 0.09 | 3.07E-04 | 1.29E-02 |
| nicotinamide nucleotide metabolic process (GO:0046496)               | 122 | 1 | 11.68 | - | 0.09 | 3.11E-04 | 1.29E-02 |
| chromosome segregation (GO:0007059)                                  | 124 | 1 | 11.87 | - | 0.08 | 3.29E-04 | 1.34E-02 |
| ribonucleoside triphosphate biosynthetic process (GO:0009201)        | 128 | 1 | 12.25 | - | 0.08 | 2.20E-04 | 9.71E-03 |

|                                                           |     |   |       |   |        |          |          |
|-----------------------------------------------------------|-----|---|-------|---|--------|----------|----------|
| nucleoside triphosphate biosynthetic process (GO:0009142) | 132 | 1 | 12.64 | - | 0.08   | 1.47E-04 | 6.98E-03 |
| rRNA processing (GO:0006364)                              | 228 | 1 | 21.83 | - | 0.05   | 2.69E-08 | 5.68E-06 |
| rRNA metabolic process (GO:0016072)                       | 241 | 1 | 23.07 | - | 0.04   | 1.35E-08 | 3.32E-06 |
| ribosomal large subunit biogenesis (GO:0042273)           | 104 | 0 | 9.96  | - | < 0.01 | 1.52E-04 | 6.99E-03 |
| cellular aldehyde metabolic process (GO:0006081)          | 79  | 0 | 7.56  | - | < 0.01 | 1.12E-03 | 3.80E-02 |
| recombinational repair (GO:0000725)                       | 82  | 0 | 7.85  | - | < 0.01 | 1.18E-03 | 3.97E-02 |

| Analysis Type: PANTHER Overrepresentation Test (Released 2017-12-05)          |                    |                 |          |                |                    |                 |          |
|-------------------------------------------------------------------------------|--------------------|-----------------|----------|----------------|--------------------|-----------------|----------|
| Annotation Version and Release Date: GO Ontology database Released 2018-05-21 |                    |                 |          |                |                    |                 |          |
| Analyzed List: Trisomy2_outliers (Arabidopsis thaliana)                       |                    |                 |          |                |                    |                 |          |
| Reference List: Arabidopsis thaliana (all genes in database)                  |                    |                 |          |                |                    |                 |          |
| Test Type: FISHER                                                             |                    |                 |          |                |                    |                 |          |
| GO biological process complete                                                | REFLIST<br>(27502) | Input<br>(2043) | expected | over/<br>under | fold<br>Enrichment | raw P-<br>value | FDR      |
| secondary metabolic process (GO:0019748)                                      | 521                | 76              | 38.7     | +              | 1.96               | 3.07E-07        | 4.13E-05 |
| secondary metabolite biosynthetic process (GO:0044550)                        | 337                | 49              | 25.03    | +              | 1.96               | 4.26E-05        | 3.70E-03 |
| metabolic process (GO:0008152)                                                | 11121              | 736             | 826.13   | -              | 0.89               | 8.44E-05        | 6.65E-03 |
| organic substance metabolic process (GO:0071704)                              | 9935               | 635             | 738.03   | -              | 0.86               | 3.85E-06        | 4.14E-04 |
| cellular metabolic process (GO:0044237)                                       | 9524               | 587             | 707.5    | -              | 0.83               | 4.56E-08        | 8.99E-06 |
| cellular macromolecule metabolic process (GO:0044260)                         | 5910               | 363             | 439.03   | -              | 0.83               | 6.01E-05        | 4.93E-03 |
| organic cyclic compound metabolic process (GO:1901360)                        | 4493               | 274             | 333.76   | -              | 0.82               | 4.26E-04        | 2.83E-02 |
| cellular process (GO:0009987)                                                 | 12555              | 763             | 932.65   | -              | 0.82               | 2.53E-13        | 2.14E-10 |
| primary metabolic process (GO:0044238)                                        | 9223               | 558             | 685.14   | -              | 0.81               | 5.52E-09        | 1.26E-06 |
| heterocycle metabolic process (GO:0046483)                                    | 4196               | 250             | 311.7    | -              | 0.8                | 1.74E-04        | 1.24E-02 |
| nucleic acid metabolic process (GO:0090304)                                   | 3438               | 202             | 255.39   | -              | 0.79               | 4.21E-04        | 2.83E-02 |
| nucleobase-containing compound metabolic process (GO:0006139)                 | 3878               | 221             | 288.08   | -              | 0.77               | 2.14E-05        | 2.08E-03 |
| macromolecule metabolic process (GO:0043170)                                  | 7271               | 411             | 540.13   | -              | 0.76               | 1.40E-10        | 4.36E-08 |
| nitrogen compound metabolic process (GO:0006807)                              | 8015               | 452             | 595.4    | -              | 0.76               | 4.83E-12        | 2.59E-09 |
| cellular nitrogen compound metabolic process (GO:0034641)                     | 4767               | 266             | 354.12   | -              | 0.75               | 2.87E-07        | 3.95E-05 |
| transport (GO:0006810)                                                        | 2455               | 133             | 182.37   | -              | 0.73               | 1.34E-04        | 1.00E-02 |
| localization (GO:0051179)                                                     | 2633               | 142             | 195.59   | -              | 0.73               | 5.92E-05        | 5.00E-03 |
| establishment of localization (GO:0051234)                                    | 2500               | 134             | 185.71   | -              | 0.72               | 6.63E-05        | 5.37E-03 |
| organonitrogen compound metabolic process (GO:1901564)                        | 4900               | 258             | 364      | -              | 0.71               | 7.97E-10        | 1.96E-07 |
| phosphorus metabolic process (GO:0006793)                                     | 1917               | 98              | 142.41   | -              | 0.69               | 1.07E-04        | 8.21E-03 |
| phosphate-containing compound metabolic process (GO:0006796)                  | 1844               | 94              | 136.98   | -              | 0.69               | 1.41E-04        | 1.04E-02 |
| protein modification process (GO:0036211)                                     | 2360               | 110             | 175.31   | -              | 0.63               | 1.31E-07        | 2.28E-05 |
| cellular protein modification process (GO:0006464)                            | 2360               | 110             | 175.31   | -              | 0.63               | 1.31E-07        | 2.21E-05 |
| protein metabolic process (GO:0019538)                                        | 3702               | 170             | 275      | -              | 0.62               | 2.76E-12        | 1.81E-09 |
| cellular protein metabolic process (GO:0044267)                               | 3337               | 150             | 247.89   | -              | 0.61               | 9.45E-12        | 4.66E-09 |
| organic substance transport (GO:0071702)                                      | 1370               | 61              | 101.77   | -              | 0.6                | 2.29E-05        | 2.18E-03 |



|                                                               |      |     |        |   |      |          |          |
|---------------------------------------------------------------|------|-----|--------|---|------|----------|----------|
| macromolecule modification<br>(GO:0043412)                    | 2842 | 117 | 211.12 | - | 0.55 | 9.51E-13 | 7.03E-10 |
| cellular component organization<br>(GO:0016043)               | 2799 | 110 | 207.93 | - | 0.53 | 6.01E-14 | 5.92E-11 |
| cellular amide metabolic process<br>(GO:0043603)              | 820  | 32  | 60.91  | - | 0.53 | 8.81E-05 | 6.85E-03 |
| negative regulation of cellular process<br>(GO:0048523)       | 675  | 26  | 50.14  | - | 0.52 | 3.71E-04 | 2.55E-02 |
| cellular component organization or<br>biogenesis (GO:0071840) | 3161 | 120 | 234.82 | - | 0.51 | 4.29E-17 | 2.54E-13 |
| macromolecule localization<br>(GO:0033036)                    | 1134 | 43  | 84.24  | - | 0.51 | 1.37E-06 | 1.61E-04 |
| peptide metabolic process (GO:0006518)                        | 726  | 26  | 53.93  | - | 0.48 | 5.59E-05 | 4.79E-03 |
| chromosome organization (GO:0051276)                          | 544  | 19  | 40.41  | - | 0.47 | 3.93E-04 | 2.67E-02 |
| organonitrogen compound biosynthetic<br>process (GO:1901566)  | 1571 | 54  | 116.7  | - | 0.46 | 1.77E-10 | 5.22E-08 |
| cell cycle (GO:0007049)                                       | 568  | 19  | 42.19  | - | 0.45 | 1.42E-04 | 1.04E-02 |
| nitrogen compound transport<br>(GO:0071705)                   | 1052 | 35  | 78.15  | - | 0.45 | 9.68E-08 | 1.79E-05 |
| amide transport (GO:0042886)                                  | 837  | 25  | 62.18  | - | 0.4  | 2.54E-07 | 3.75E-05 |
| peptide transport (GO:0015833)                                | 822  | 24  | 61.06  | - | 0.39 | 1.96E-07 | 3.22E-05 |
| amide biosynthetic process<br>(GO:0043604)                    | 687  | 20  | 51.03  | - | 0.39 | 1.90E-06 | 2.20E-04 |
| mRNA metabolic process (GO:0016071)                           | 523  | 15  | 38.85  | - | 0.39 | 3.30E-05 | 2.96E-03 |
| peptidyl-amino acid modification<br>(GO:0018193)              | 354  | 10  | 26.3   | - | 0.38 | 7.81E-04 | 4.86E-02 |
| cellular localization (GO:0051641)                            | 918  | 25  | 68.19  | - | 0.37 | 6.66E-09 | 1.46E-06 |
| intracellular transport (GO:0046907)                          | 699  | 19  | 51.93  | - | 0.37 | 4.71E-07 | 5.80E-05 |
| establishment of localization in cell<br>(GO:0051649)         | 740  | 20  | 54.97  | - | 0.36 | 2.04E-07 | 3.26E-05 |
| organelle organization (GO:0006996)                           | 1645 | 43  | 122.2  | - | 0.35 | 2.74E-16 | 8.09E-13 |
| ubiquitin-dependent protein catabolic<br>process (GO:0006511) | 460  | 12  | 34.17  | - | 0.35 | 3.27E-05 | 2.98E-03 |
| regulation of cellular component<br>organization (GO:0051128) | 445  | 11  | 33.06  | - | 0.33 | 2.37E-05 | 2.22E-03 |
| cellular component biogenesis<br>(GO:0044085)                 | 1309 | 32  | 97.24  | - | 0.33 | 5.23E-14 | 6.19E-11 |
| translation (GO:0006412)                                      | 620  | 15  | 46.06  | - | 0.33 | 3.15E-07 | 4.14E-05 |
| vesicle-mediated transport (GO:0016192)                       | 499  | 12  | 37.07  | - | 0.32 | 5.66E-06 | 5.98E-04 |
| peptide biosynthetic process<br>(GO:0043043)                  | 625  | 15  | 46.43  | - | 0.32 | 2.32E-07 | 3.61E-05 |
| cellular macromolecule localization<br>(GO:0070727)           | 688  | 15  | 51.11  | - | 0.29 | 1.09E-08 | 2.30E-06 |
| intracellular protein transport<br>(GO:0006886)               | 560  | 12  | 41.6   | - | 0.29 | 2.67E-07 | 3.85E-05 |
| cellular protein localization (GO:0034613)                    | 655  | 14  | 48.66  | - | 0.29 | 1.87E-08 | 3.81E-06 |
| protein transport (GO:0015031)                                | 763  | 16  | 56.68  | - | 0.28 | 7.03E-10 | 1.89E-07 |
| establishment of protein localization<br>(GO:0045184)         | 771  | 16  | 57.27  | - | 0.28 | 5.27E-10 | 1.48E-07 |
| DNA metabolic process (GO:0006259)                            | 537  | 11  | 39.89  | - | 0.28 | 2.35E-07 | 3.57E-05 |
| protein localization (GO:0008104)                             | 847  | 17  | 62.92  | - | 0.27 | 2.30E-11 | 9.71E-09 |

|                                                                                                   |     |    |       |   |        |          |          |
|---------------------------------------------------------------------------------------------------|-----|----|-------|---|--------|----------|----------|
| cellular component assembly (GO:0022607)                                                          | 788 | 15 | 58.54 | - | 0.26   | 4.68E-11 | 1.73E-08 |
| mitotic cell cycle (GO:0000278)                                                                   | 268 | 5  | 19.91 | - | 0.25   | 2.60E-04 | 1.83E-02 |
| regulation of organelle organization (GO:0033043)                                                 | 278 | 5  | 20.65 | - | 0.24   | 1.31E-04 | 9.93E-03 |
| cytoskeleton organization (GO:0007010)                                                            | 247 | 4  | 18.35 | - | 0.22   | 1.51E-04 | 1.09E-02 |
| mRNA processing (GO:0006397)                                                                      | 393 | 6  | 29.19 | - | 0.21   | 7.41E-07 | 8.94E-05 |
| mitotic cell cycle process (GO:1903047)                                                           | 199 | 3  | 14.78 | - | 0.2    | 6.87E-04 | 4.41E-02 |
| RNA splicing, via transesterification reactions with bulged adenosine as nucleophile (GO:0000377) | 201 | 3  | 14.93 | - | 0.2    | 7.10E-04 | 4.51E-02 |
| RNA splicing, via transesterification reactions (GO:0000375)                                      | 201 | 3  | 14.93 | - | 0.2    | 7.10E-04 | 4.46E-02 |
| protein targeting (GO:0006605)                                                                    | 210 | 3  | 15.6  | - | 0.19   | 3.42E-04 | 2.38E-02 |
| proteasomal protein catabolic process (GO:0010498)                                                | 296 | 4  | 21.99 | - | 0.18   | 9.77E-06 | 9.79E-04 |
| protein localization to organelle (GO:0033365)                                                    | 299 | 4  | 22.21 | - | 0.18   | 1.02E-05 | 1.01E-03 |
| protein-containing complex subunit organization (GO:0043933)                                      | 645 | 8  | 47.91 | - | 0.17   | 4.71E-12 | 2.78E-09 |
| RNA processing (GO:0006396)                                                                       | 819 | 10 | 60.84 | - | 0.16   | 3.69E-15 | 7.28E-12 |
| plastid organization (GO:0009657)                                                                 | 253 | 3  | 18.79 | - | 0.16   | 3.05E-05 | 2.82E-03 |
| cellular response to DNA damage stimulus (GO:0006974)                                             | 351 | 4  | 26.07 | - | 0.15   | 4.30E-07 | 5.40E-05 |
| tRNA metabolic process (GO:0006399)                                                               | 176 | 2  | 13.07 | - | 0.15   | 5.25E-04 | 3.41E-02 |
| protein-containing complex assembly (GO:0065003)                                                  | 554 | 6  | 41.15 | - | 0.15   | 3.88E-11 | 1.53E-08 |
| proteasome-mediated ubiquitin-dependent protein catabolic process (GO:0043161)                    | 284 | 3  | 21.1  | - | 0.14   | 3.42E-06 | 3.89E-04 |
| RNA splicing (GO:0008380)                                                                         | 285 | 3  | 21.17 | - | 0.14   | 3.44E-06 | 3.83E-04 |
| cellular protein-containing complex assembly (GO:0034622)                                         | 508 | 5  | 37.74 | - | 0.13   | 1.07E-10 | 3.52E-08 |
| membrane organization (GO:0061024)                                                                | 210 | 2  | 15.6  | - | 0.13   | 5.96E-05 | 4.96E-03 |
| DNA repair (GO:0006281)                                                                           | 322 | 3  | 23.92 | - | 0.13   | 4.06E-07 | 5.21E-05 |
| organelle assembly (GO:0070925)                                                                   | 217 | 2  | 16.12 | - | 0.12   | 4.18E-05 | 3.69E-03 |
| RNA modification (GO:0009451)                                                                     | 441 | 4  | 32.76 | - | 0.12   | 1.26E-09 | 2.98E-07 |
| establishment of protein localization to organelle (GO:0072594)                                   | 246 | 2  | 18.27 | - | 0.11   | 6.68E-06 | 6.93E-04 |
| regulation of cellular component biogenesis (GO:0044087)                                          | 149 | 1  | 11.07 | - | 0.09   | 5.18E-04 | 3.40E-02 |
| ncRNA metabolic process (GO:0034660)                                                              | 421 | 2  | 31.27 | - | 0.06   | 5.37E-11 | 1.87E-08 |
| ribonucleoprotein complex assembly (GO:0022618)                                                   | 212 | 1  | 15.75 | - | 0.06   | 8.02E-06 | 8.17E-04 |
| ribosome biogenesis (GO:0042254)                                                                  | 440 | 2  | 32.69 | - | 0.06   | 1.76E-11 | 8.01E-09 |
| ribonucleoprotein complex subunit organization (GO:0071826)                                       | 221 | 1  | 16.42 | - | 0.06   | 3.59E-06 | 3.93E-04 |
| ribonucleoprotein complex biogenesis (GO:0022613)                                                 | 532 | 2  | 39.52 | - | 0.05   | 2.29E-14 | 3.39E-11 |
| ncRNA processing (GO:0034470)                                                                     | 343 | 1  | 25.48 | - | 0.04   | 7.07E-10 | 1.82E-07 |
| microtubule cytoskeleton organization (GO:0000226)                                                | 141 | 0  | 10.47 | - | < 0.01 | 7.61E-05 | 6.08E-03 |
| microtubule-based process (GO:0007017)                                                            | 216 | 0  | 16.05 | - | < 0.01 | 2.74E-07 | 3.85E-05 |

|                                     |     |   |       |   |        |          |          |
|-------------------------------------|-----|---|-------|---|--------|----------|----------|
| rRNA processing (GO:0006364)        | 228 | 0 | 16.94 | - | < 0.01 | 1.23E-07 | 2.20E-05 |
| rRNA metabolic process (GO:0016072) | 241 | 0 | 17.9  | - | < 0.01 | 5.65E-08 | 1.08E-05 |

| Analysis Type: PANTHER Overrepresentation Test (Released 2017-12-05)                 |                    |                 |              |                    |                        |                 |          |
|--------------------------------------------------------------------------------------|--------------------|-----------------|--------------|--------------------|------------------------|-----------------|----------|
| Annotation Version and Release Date: GO Ontology database Released 2018-05-21        |                    |                 |              |                    |                        |                 |          |
| Analyzed List: Trisomy3_outliers (Arabidopsis thaliana)                              |                    |                 |              |                    |                        |                 |          |
| Reference List: Arabidopsis thaliana (all genes in database)                         |                    |                 |              |                    |                        |                 |          |
| Test Type: FISHER                                                                    |                    |                 |              |                    |                        |                 |          |
| GO biological process complete                                                       | REFLIST<br>(27502) | Input(<br>3176) | expecte<br>d | over/<br>unde<br>r | fold<br>Enrich<br>ment | raw P-<br>value | FDR      |
| DNA replication initiation (GO:0006270)                                              | 24                 | 15              | 2.77         | +                  | 5.41                   | 3.63E-06        | 3.15E-04 |
| cellulose catabolic process (GO:0030245)                                             | 25                 | 14              | 2.89         | +                  | 4.85                   | 1.93E-05        | 1.30E-03 |
| beta-glucan catabolic process (GO:0051275)                                           | 25                 | 14              | 2.89         | +                  | 4.85                   | 1.93E-05        | 1.28E-03 |
| regulation of cyclin-dependent protein serine/threonine kinase activity (GO:0000079) | 66                 | 23              | 7.62         | +                  | 3.02                   | 2.69E-05        | 1.73E-03 |
| regulation of cyclin-dependent protein kinase activity (GO:1904029)                  | 66                 | 23              | 7.62         | +                  | 3.02                   | 2.69E-05        | 1.71E-03 |
| positive regulation of cell proliferation (GO:0008284)                               | 64                 | 21              | 7.39         | +                  | 2.84                   | 1.20E-04        | 6.15E-03 |
| pectin catabolic process (GO:0045490)                                                | 97                 | 31              | 11.2         | +                  | 2.77                   | 5.94E-06        | 4.50E-04 |
| regulation of protein serine/threonine kinase activity (GO:0071900)                  | 84                 | 24              | 9.7          | +                  | 2.47                   | 3.37E-04        | 1.44E-02 |
| regulation of cell proliferation (GO:0042127)                                        | 103                | 29              | 11.89        | +                  | 2.44                   | 7.92E-05        | 4.26E-03 |
| regulation of mitotic nuclear division (GO:0007088)                                  | 76                 | 21              | 8.78         | +                  | 2.39                   | 1.11E-03        | 4.02E-02 |
| polysaccharide catabolic process (GO:0000272)                                        | 185                | 51              | 21.36        | +                  | 2.39                   | 4.36E-07        | 4.86E-05 |
| DNA-dependent DNA replication (GO:0006261)                                           | 117                | 28              | 13.51        | +                  | 2.07                   | 1.39E-03        | 4.84E-02 |
| regulation of protein kinase activity (GO:0045859)                                   | 140                | 33              | 16.17        | +                  | 2.04                   | 5.98E-04        | 2.36E-02 |
| cell wall modification (GO:0042545)                                                  | 162                | 38              | 18.71        | +                  | 2.03                   | 2.48E-04        | 1.14E-02 |
| regulation of kinase activity (GO:0043549)                                           | 141                | 33              | 16.28        | +                  | 2.03                   | 6.28E-04        | 2.43E-02 |
| regulation of transferase activity (GO:0051338)                                      | 166                | 38              | 19.17        | +                  | 1.98                   | 3.12E-04        | 1.38E-02 |
| drug catabolic process (GO:0042737)                                                  | 253                | 56              | 29.22        | +                  | 1.92                   | 3.07E-05        | 1.89E-03 |
| cell wall organization (GO:0071555)                                                  | 546                | 115             | 63.05        | +                  | 1.82                   | 3.07E-08        | 4.54E-06 |
| external encapsulating structure organization (GO:0045229)                           | 582                | 119             | 67.21        | +                  | 1.77                   | 5.64E-08        | 7.76E-06 |
| carbohydrate catabolic process (GO:0016052)                                          | 293                | 55              | 33.84        | +                  | 1.63                   | 1.40E-03        | 4.83E-02 |
| cell wall organization or biogenesis (GO:0071554)                                    | 735                | 136             | 84.88        | +                  | 1.6                    | 1.08E-06        | 1.10E-04 |
| secondary metabolite biosynthetic process (GO:0044550)                               | 337                | 62              | 38.92        | +                  | 1.59                   | 1.19E-03        | 4.24E-02 |
| polysaccharide metabolic process (GO:0005976)                                        | 474                | 83              | 54.74        | +                  | 1.52                   | 7.19E-04        | 2.73E-02 |
| RNA biosynthetic process (GO:0032774)                                                | 1893               | 280             | 218.61       | +                  | 1.28                   | 9.13E-05        | 4.82E-03 |
| nucleic acid-templated transcription (GO:0097659)                                    | 1888               | 278             | 218.03       | +                  | 1.28                   | 1.39E-04        | 7.03E-03 |
| transcription, DNA-templated (GO:0006351)                                            | 1888               | 278             | 218.03       | +                  | 1.28                   | 1.39E-04        | 6.97E-03 |

|                                                                 |       |      |         |   |      |          |          |
|-----------------------------------------------------------------|-------|------|---------|---|------|----------|----------|
| regulation of transcription, DNA-templated (GO:0006355)         | 2491  | 351  | 287.67  | + | 1.22 | 3.30E-04 | 1.45E-02 |
| regulation of RNA biosynthetic process (GO:2001141)             | 2493  | 351  | 287.9   | + | 1.22 | 3.33E-04 | 1.45E-02 |
| regulation of nucleic acid-templated transcription (GO:1903506) | 2493  | 351  | 287.9   | + | 1.22 | 3.33E-04 | 1.44E-02 |
| metabolic process (GO:0008152)                                  | 11121 | 1180 | 1284.28 | - | 0.92 | 3.49E-04 | 1.47E-02 |
| organic substance metabolic process (GO:0071704)                | 9935  | 1029 | 1147.32 | - | 0.9  | 3.10E-05 | 1.87E-03 |
| cellular process (GO:0009987)                                   | 12555 | 1290 | 1449.88 | - | 0.89 | 6.40E-08 | 8.41E-06 |
| primary metabolic process (GO:0044238)                          | 9223  | 940  | 1065.1  | - | 0.88 | 7.41E-06 | 5.41E-04 |
| macromolecule metabolic process (GO:0043170)                    | 7271  | 737  | 839.67  | - | 0.88 | 7.86E-05 | 4.26E-03 |
| cellular metabolic process (GO:0044237)                         | 9524  | 947  | 1099.86 | - | 0.86 | 4.82E-08 | 6.95E-06 |
| cellular aromatic compound metabolic process (GO:0006725)       | 4370  | 434  | 504.66  | - | 0.86 | 9.63E-04 | 3.54E-02 |
| heterocycle metabolic process (GO:0046483)                      | 4196  | 402  | 484.56  | - | 0.83 | 8.15E-05 | 4.34E-03 |
| nucleobase-containing compound metabolic process (GO:0006139)   | 3878  | 371  | 447.84  | - | 0.83 | 1.61E-04 | 7.94E-03 |
| cellular component organization or biogenesis (GO:0071840)      | 3161  | 300  | 365.04  | - | 0.82 | 4.70E-04 | 1.90E-02 |
| gene expression (GO:0010467)                                    | 3289  | 312  | 379.82  | - | 0.82 | 3.39E-04 | 1.44E-02 |
| localization (GO:0051179)                                       | 2633  | 244  | 304.07  | - | 0.8  | 4.54E-04 | 1.86E-02 |
| establishment of localization (GO:0051234)                      | 2500  | 231  | 288.71  | - | 0.8  | 5.45E-04 | 2.19E-02 |
| protein modification process (GO:0036211)                       | 2360  | 218  | 272.54  | - | 0.8  | 8.18E-04 | 3.06E-02 |
| cellular protein modification process (GO:0006464)              | 2360  | 218  | 272.54  | - | 0.8  | 8.18E-04 | 3.04E-02 |
| nitrogen compound metabolic process (GO:0006807)                | 8015  | 731  | 925.59  | - | 0.79 | 1.87E-13 | 1.10E-10 |
| transport (GO:0006810)                                          | 2455  | 223  | 283.51  | - | 0.79 | 2.57E-04 | 1.18E-02 |
| cellular nitrogen compound metabolic process (GO:0034641)       | 4767  | 420  | 550.51  | - | 0.76 | 2.19E-09 | 4.04E-07 |
| organic substance transport (GO:0071702)                        | 1370  | 115  | 158.21  | - | 0.73 | 5.51E-04 | 2.20E-02 |
| protein metabolic process (GO:0019538)                          | 3702  | 310  | 427.52  | - | 0.73 | 1.53E-09 | 3.13E-07 |
| small molecule metabolic process (GO:0044281)                   | 1751  | 143  | 202.21  | - | 0.71 | 2.12E-05 | 1.39E-03 |
| cellular protein metabolic process (GO:0044267)                 | 3337  | 270  | 385.37  | - | 0.7  | 4.46E-10 | 9.76E-08 |
| organonitrogen compound metabolic process (GO:1901564)          | 4900  | 388  | 565.86  | - | 0.69 | 2.27E-16 | 3.36E-13 |
| macromolecule modification (GO:0043412)                         | 2842  | 225  | 328.2   | - | 0.69 | 1.86E-09 | 3.55E-07 |
| organelle organization (GO:0006996)                             | 1645  | 125  | 189.97  | - | 0.66 | 1.09E-06 | 1.09E-04 |
| small molecule biosynthetic process (GO:0044283)                | 757   | 57   | 87.42   | - | 0.65 | 1.06E-03 | 3.88E-02 |
| cellular macromolecule catabolic process (GO:0044265)           | 770   | 57   | 88.92   | - | 0.64 | 6.21E-04 | 2.42E-02 |
| cellular component assembly (GO:0022607)                        | 788   | 58   | 91      | - | 0.64 | 4.65E-04 | 1.90E-02 |

|                                                                     |      |    |        |   |      |          |          |
|---------------------------------------------------------------------|------|----|--------|---|------|----------|----------|
| carbohydrate derivative metabolic process (GO:1901135)              | 867  | 63 | 100.12 | - | 0.63 | 1.56E-04 | 7.75E-03 |
| cellular component biogenesis (GO:0044085)                          | 1309 | 95 | 151.17 | - | 0.63 | 2.34E-06 | 2.16E-04 |
| macromolecule localization (GO:0033036)                             | 1134 | 80 | 130.96 | - | 0.61 | 4.60E-06 | 3.83E-04 |
| carbohydrate derivative biosynthetic process (GO:1901137)           | 536  | 36 | 61.9   | - | 0.58 | 8.45E-04 | 3.12E-02 |
| negative regulation of gene expression (GO:0010629)                 | 484  | 32 | 55.89  | - | 0.57 | 1.28E-03 | 4.54E-02 |
| response to metal ion (GO:0010038)                                  | 483  | 29 | 55.78  | - | 0.52 | 2.35E-04 | 1.10E-02 |
| modification-dependent protein catabolic process (GO:0019941)       | 526  | 31 | 60.74  | - | 0.51 | 7.75E-05 | 4.24E-03 |
| modification-dependent macromolecule catabolic process (GO:0043632) | 537  | 31 | 62.01  | - | 0.5  | 3.78E-05 | 2.21E-03 |
| cellular amino acid metabolic process (GO:0006520)                  | 427  | 24 | 49.31  | - | 0.49 | 1.72E-04 | 8.43E-03 |
| protein-containing complex assembly (GO:0065003)                    | 554  | 31 | 63.98  | - | 0.48 | 1.43E-05 | 9.97E-04 |
| protein-containing complex subunit organization (GO:0043933)        | 645  | 35 | 74.49  | - | 0.47 | 1.16E-06 | 1.14E-04 |
| nitrogen compound transport (GO:0071705)                            | 1052 | 56 | 121.49 | - | 0.46 | 1.85E-10 | 4.37E-08 |
| cellular localization (GO:0051641)                                  | 918  | 47 | 106.01 | - | 0.44 | 6.98E-10 | 1.47E-07 |
| cellular protein-containing complex assembly (GO:0034622)           | 508  | 26 | 58.67  | - | 0.44 | 5.60E-06 | 4.30E-04 |
| organonitrogen compound biosynthetic process (GO:1901566)           | 1571 | 80 | 181.42 | - | 0.44 | 1.67E-16 | 3.29E-13 |
| peptidyl-amino acid modification (GO:0018193)                       | 354  | 18 | 40.88  | - | 0.44 | 2.06E-04 | 9.76E-03 |
| organophosphate metabolic process (GO:0019637)                      | 610  | 31 | 70.44  | - | 0.44 | 5.30E-07 | 5.80E-05 |
| ubiquitin-dependent protein catabolic process (GO:0006511)          | 460  | 22 | 53.12  | - | 0.41 | 5.18E-06 | 4.03E-04 |
| response to cadmium ion (GO:0046686)                                | 342  | 16 | 39.5   | - | 0.41 | 7.53E-05 | 4.16E-03 |
| generation of precursor metabolites and energy (GO:0006091)         | 369  | 17 | 42.61  | - | 0.4  | 3.22E-05 | 1.90E-03 |
| establishment of localization in cell (GO:0051649)                  | 740  | 34 | 85.46  | - | 0.4  | 1.63E-09 | 3.21E-07 |
| vesicle-mediated transport (GO:0016192)                             | 499  | 22 | 57.63  | - | 0.38 | 4.33E-07 | 4.93E-05 |
| membrane organization (GO:0061024)                                  | 210  | 9  | 24.25  | - | 0.37 | 1.13E-03 | 4.05E-02 |
| organophosphate biosynthetic process (GO:0090407)                   | 402  | 17 | 46.42  | - | 0.37 | 3.33E-06 | 2.93E-04 |
| amide transport (GO:0042886)                                        | 837  | 34 | 96.66  | - | 0.35 | 1.55E-12 | 5.73E-10 |
| coenzyme metabolic process (GO:0006732)                             | 324  | 13 | 37.42  | - | 0.35 | 1.92E-05 | 1.30E-03 |
| amide biosynthetic process (GO:0043604)                             | 687  | 27 | 79.34  | - | 0.34 | 6.64E-11 | 1.71E-08 |
| cellular macromolecule localization (GO:0070727)                    | 688  | 27 | 79.45  | - | 0.34 | 6.63E-11 | 1.78E-08 |
| peptide transport (GO:0015833)                                      | 822  | 32 | 94.93  | - | 0.34 | 6.03E-13 | 2.74E-10 |
| photosynthesis (GO:0015979)                                         | 235  | 9  | 27.14  | - | 0.33 | 1.90E-04 | 9.20E-03 |
| cellular protein localization (GO:0034613)                          | 655  | 25 | 75.64  | - | 0.33 | 1.18E-10 | 2.90E-08 |

|                                                                                |     |    |       |   |      |          |          |
|--------------------------------------------------------------------------------|-----|----|-------|---|------|----------|----------|
| cellular amide metabolic process (GO:0043603)                                  | 820 | 31 | 94.7  | - | 0.33 | 2.33E-13 | 1.25E-10 |
| protein localization (GO:0008104)                                              | 847 | 32 | 97.81 | - | 0.33 | 9.67E-14 | 8.17E-11 |
| cofactor biosynthetic process (GO:0051188)                                     | 292 | 11 | 33.72 | - | 0.33 | 2.44E-05 | 1.59E-03 |
| protein folding (GO:0006457)                                                   | 266 | 10 | 30.72 | - | 0.33 | 5.87E-05 | 3.37E-03 |
| intracellular transport (GO:0046907)                                           | 699 | 26 | 80.72 | - | 0.32 | 1.03E-11 | 3.38E-09 |
| protein transport (GO:0015031)                                                 | 763 | 28 | 88.11 | - | 0.32 | 7.01E-13 | 2.96E-10 |
| establishment of protein localization (GO:0045184)                             | 771 | 28 | 89.04 | - | 0.31 | 3.76E-13 | 1.85E-10 |
| coenzyme biosynthetic process (GO:0009108)                                     | 230 | 8  | 26.56 | - | 0.3  | 9.86E-05 | 5.11E-03 |
| nucleobase-containing small molecule metabolic process (GO:0055086)            | 462 | 16 | 53.35 | - | 0.3  | 1.39E-08 | 2.42E-06 |
| intracellular protein transport (GO:0006886)                                   | 560 | 19 | 64.67 | - | 0.29 | 2.11E-10 | 4.80E-08 |
| translation (GO:0006412)                                                       | 620 | 21 | 71.6  | - | 0.29 | 1.96E-11 | 5.80E-09 |
| peptide biosynthetic process (GO:0043043)                                      | 625 | 21 | 72.18 | - | 0.29 | 1.46E-11 | 4.54E-09 |
| peptide metabolic process (GO:0006518)                                         | 726 | 24 | 83.84 | - | 0.29 | 1.52E-13 | 1.12E-10 |
| proteasome-mediated ubiquitin-dependent protein catabolic process (GO:0043161) | 284 | 9  | 32.8  | - | 0.27 | 4.39E-06 | 3.76E-04 |
| nucleoside triphosphate metabolic process (GO:0009141)                         | 191 | 6  | 22.06 | - | 0.27 | 2.24E-04 | 1.05E-02 |
| proteasomal protein catabolic process (GO:0010498)                             | 296 | 9  | 34.18 | - | 0.26 | 1.65E-06 | 1.57E-04 |
| macromolecule methylation (GO:0043414)                                         | 167 | 5  | 19.29 | - | 0.26 | 3.78E-04 | 1.59E-02 |
| mitochondrion organization (GO:0007005)                                        | 171 | 5  | 19.75 | - | 0.25 | 2.71E-04 | 1.23E-02 |
| nucleobase-containing compound transport (GO:0015931)                          | 147 | 4  | 16.98 | - | 0.24 | 6.68E-04 | 2.56E-02 |
| Golgi vesicle transport (GO:0048193)                                           | 187 | 5  | 21.6  | - | 0.23 | 7.05E-05 | 3.93E-03 |
| nucleotide metabolic process (GO:0009117)                                      | 342 | 9  | 39.5  | - | 0.23 | 2.97E-08 | 4.62E-06 |
| nucleoside phosphate metabolic process (GO:0006753)                            | 346 | 9  | 39.96 | - | 0.23 | 2.11E-08 | 3.37E-06 |
| pyridine nucleotide metabolic process (GO:0019362)                             | 124 | 3  | 14.32 | - | 0.21 | 1.11E-03 | 4.03E-02 |
| protein targeting (GO:0006605)                                                 | 210 | 5  | 24.25 | - | 0.21 | 8.94E-06 | 6.44E-04 |
| ribonucleoside triphosphate biosynthetic process (GO:0009201)                  | 128 | 3  | 14.78 | - | 0.2  | 7.83E-04 | 2.95E-02 |
| protein localization to organelle (GO:0033365)                                 | 299 | 7  | 34.53 | - | 0.2  | 7.70E-08 | 9.90E-06 |
| nucleotide biosynthetic process (GO:0009165)                                   | 219 | 5  | 25.29 | - | 0.2  | 4.45E-06 | 3.76E-04 |
| tRNA metabolic process (GO:0006399)                                            | 176 | 4  | 20.32 | - | 0.2  | 4.09E-05 | 2.37E-03 |
| nucleoside phosphate biosynthetic process (GO:1901293)                         | 221 | 5  | 25.52 | - | 0.2  | 4.62E-06 | 3.79E-04 |
| pyridine-containing compound metabolic process (GO:0072524)                    | 133 | 3  | 15.36 | - | 0.2  | 5.62E-04 | 2.23E-02 |
| ribonucleoside triphosphate metabolic process (GO:0009199)                     | 181 | 4  | 20.9  | - | 0.19 | 2.87E-05 | 1.79E-03 |
| mRNA metabolic process (GO:0016071)                                            | 523 | 11 | 60.4  | - | 0.18 | 8.54E-14 | 8.42E-11 |

|                                                                                                   |     |    |       |   |      |          |          |
|---------------------------------------------------------------------------------------------------|-----|----|-------|---|------|----------|----------|
| oxidoreduction coenzyme metabolic process (GO:0006733)                                            | 144 | 3  | 16.63 | - | 0.18 | 1.90E-04 | 9.14E-03 |
| nucleoside monophosphate metabolic process (GO:0009123)                                           | 214 | 4  | 24.71 | - | 0.16 | 1.69E-06 | 1.58E-04 |
| nucleoside monophosphate biosynthetic process (GO:0009124)                                        | 162 | 3  | 18.71 | - | 0.16 | 3.09E-05 | 1.88E-03 |
| ATP metabolic process (GO:0046034)                                                                | 163 | 3  | 18.82 | - | 0.16 | 3.10E-05 | 1.85E-03 |
| RNA processing (GO:0006396)                                                                       | 819 | 15 | 94.58 | - | 0.16 | 7.58E-23 | 4.48E-19 |
| ribose phosphate metabolic process (GO:0019693)                                                   | 275 | 5  | 31.76 | - | 0.16 | 3.04E-08 | 4.61E-06 |
| ATP biosynthetic process (GO:0006754)                                                             | 112 | 2  | 12.93 | - | 0.15 | 6.04E-04 | 2.37E-02 |
| RNA splicing (GO:0008380)                                                                         | 285 | 5  | 32.91 | - | 0.15 | 1.00E-08 | 1.79E-06 |
| purine ribonucleoside triphosphate metabolic process (GO:0009205)                                 | 173 | 3  | 19.98 | - | 0.15 | 1.58E-05 | 1.09E-03 |
| purine nucleoside triphosphate metabolic process (GO:0009144)                                     | 176 | 3  | 20.32 | - | 0.15 | 1.06E-05 | 7.48E-04 |
| electron transport chain (GO:0022900)                                                             | 118 | 2  | 13.63 | - | 0.15 | 4.24E-04 | 1.77E-02 |
| ribosome assembly (GO:0042255)                                                                    | 118 | 2  | 13.63 | - | 0.15 | 4.24E-04 | 1.75E-02 |
| ribonucleotide biosynthetic process (GO:0009260)                                                  | 179 | 3  | 20.67 | - | 0.15 | 7.22E-06 | 5.34E-04 |
| purine ribonucleoside triphosphate biosynthetic process (GO:0009206)                              | 120 | 2  | 13.86 | - | 0.14 | 2.89E-04 | 1.29E-02 |
| purine nucleoside triphosphate biosynthetic process (GO:0009145)                                  | 120 | 2  | 13.86 | - | 0.14 | 2.89E-04 | 1.28E-02 |
| ncRNA metabolic process (GO:0034660)                                                              | 421 | 7  | 48.62 | - | 0.14 | 1.12E-12 | 4.40E-10 |
| ribonucleotide metabolic process (GO:0009259)                                                     | 241 | 4  | 27.83 | - | 0.14 | 1.30E-07 | 1.54E-05 |
| ribose phosphate biosynthetic process (GO:0046390)                                                | 184 | 3  | 21.25 | - | 0.14 | 5.12E-06 | 4.09E-04 |
| mRNA splicing, via spliceosome (GO:0000398)                                                       | 184 | 3  | 21.25 | - | 0.14 | 5.12E-06 | 4.04E-04 |
| establishment of protein localization to organelle (GO:0072594)                                   | 246 | 4  | 28.41 | - | 0.14 | 9.33E-08 | 1.17E-05 |
| ribosome biogenesis (GO:0042254)                                                                  | 440 | 7  | 50.81 | - | 0.14 | 1.74E-13 | 1.15E-10 |
| purine ribonucleoside monophosphate metabolic process (GO:0009167)                                | 190 | 3  | 21.94 | - | 0.14 | 2.37E-06 | 2.15E-04 |
| purine nucleoside monophosphate metabolic process (GO:0009126)                                    | 190 | 3  | 21.94 | - | 0.14 | 2.37E-06 | 2.12E-04 |
| mitochondrial transport (GO:0006839)                                                              | 128 | 2  | 14.78 | - | 0.14 | 1.37E-04 | 6.99E-03 |
| purine-containing compound metabolic process (GO:0072521)                                         | 261 | 4  | 30.14 | - | 0.13 | 2.09E-08 | 3.43E-06 |
| mRNA processing (GO:0006397)                                                                      | 393 | 6  | 45.38 | - | 0.13 | 2.17E-12 | 7.54E-10 |
| protein import (GO:0017038)                                                                       | 133 | 2  | 15.36 | - | 0.13 | 9.50E-05 | 4.97E-03 |
| ribonucleoprotein complex biogenesis (GO:0022613)                                                 | 532 | 8  | 61.44 | - | 0.13 | 1.58E-16 | 4.67E-13 |
| RNA splicing, via transesterification reactions with bulged adenosine as nucleophile (GO:0000377) | 201 | 3  | 23.21 | - | 0.13 | 7.75E-07 | 8.18E-05 |
| RNA splicing, via transesterification reactions (GO:0000375)                                      | 201 | 3  | 23.21 | - | 0.13 | 7.75E-07 | 8.04E-05 |
| ncRNA processing (GO:0034470)                                                                     | 343 | 5  | 39.61 | - | 0.13 | 3.90E-11 | 1.10E-08 |
| ribonucleoside monophosphate metabolic process (GO:0009161)                                       | 207 | 3  | 23.9  | - | 0.13 | 5.48E-07 | 5.89E-05 |
| purine ribonucleoside monophosphate biosynthetic process (GO:0009168)                             | 139 | 2  | 16.05 | - | 0.12 | 6.93E-05 | 3.94E-03 |



|                                                                   |     |   |       |   |        |          |          |
|-------------------------------------------------------------------|-----|---|-------|---|--------|----------|----------|
| purine nucleoside monophosphate biosynthetic process (GO:0009127) | 139 | 2 | 16.05 | - | 0.12   | 6.93E-05 | 3.90E-03 |
| ribonucleoprotein complex assembly (GO:0022618)                   | 212 | 3 | 24.48 | - | 0.12   | 3.93E-07 | 4.55E-05 |
| RNA modification (GO:0009451)                                     | 441 | 6 | 50.93 | - | 0.12   | 2.42E-14 | 2.86E-11 |
| ribonucleoprotein complex subunit organization (GO:0071826)       | 221 | 3 | 25.52 | - | 0.12   | 1.19E-07 | 1.47E-05 |
| purine ribonucleotide metabolic process (GO:0009150)              | 221 | 3 | 25.52 | - | 0.12   | 1.19E-07 | 1.44E-05 |
| rRNA processing (GO:0006364)                                      | 228 | 3 | 26.33 | - | 0.11   | 5.60E-08 | 7.89E-06 |
| purine nucleotide metabolic process (GO:0006163)                  | 230 | 3 | 26.56 | - | 0.11   | 5.72E-08 | 7.69E-06 |
| ribonucleoside monophosphate biosynthetic process (GO:0009156)    | 155 | 2 | 17.9  | - | 0.11   | 9.86E-06 | 7.03E-04 |
| purine ribonucleotide biosynthetic process (GO:0009152)           | 160 | 2 | 18.48 | - | 0.11   | 6.78E-06 | 5.07E-04 |
| rRNA metabolic process (GO:0016072)                               | 241 | 3 | 27.83 | - | 0.11   | 1.82E-08 | 3.07E-06 |
| purine nucleotide biosynthetic process (GO:0006164)               | 166 | 2 | 19.17 | - | 0.1    | 4.93E-06 | 3.99E-04 |
| nucleic acid phosphodiester bond hydrolysis (GO:0090305)          | 86  | 1 | 9.93  | - | 0.1    | 1.29E-03 | 4.54E-02 |
| purine-containing compound biosynthetic process (GO:0072522)      | 175 | 2 | 20.21 | - | 0.1    | 1.47E-06 | 1.42E-04 |
| protein transmembrane transport (GO:0071806)                      | 88  | 1 | 10.16 | - | 0.1    | 1.32E-03 | 4.61E-02 |
| tRNA processing (GO:0008033)                                      | 104 | 1 | 12.01 | - | 0.08   | 2.85E-04 | 1.29E-02 |
| regulation of mRNA metabolic process (GO:1903311)                 | 72  | 0 | 8.31  | - | < 0.01 | 6.84E-04 | 2.61E-02 |
| response to endoplasmic reticulum stress (GO:0034976)             | 83  | 0 | 9.59  | - | < 0.01 | 1.96E-04 | 9.36E-03 |
| ribosomal large subunit biogenesis (GO:0042273)                   | 104 | 0 | 12.01 | - | < 0.01 | 2.71E-05 | 1.70E-03 |

| Analysis Type: PANTHER Overrepresentation Test (Released 2017-12-05)          |                 |              |          |             |                 |             |          |
|-------------------------------------------------------------------------------|-----------------|--------------|----------|-------------|-----------------|-------------|----------|
| Annotation Version and Release Date: GO Ontology database Released 2018-05-21 |                 |              |          |             |                 |             |          |
| Analyzed List: Trisomy4 outliers (Arabidopsis thaliana)                       |                 |              |          |             |                 |             |          |
| Reference List: Arabidopsis thaliana (all genes in database)                  |                 |              |          |             |                 |             |          |
| Test Type: FISHER                                                             |                 |              |          |             |                 |             |          |
| GO biological process complete                                                | REFLIST (27502) | Input( 2029) | expected | over/ under | fold Enrichment | raw P-value | FDR      |
| regulation of anthocyanin biosynthetic process (GO:0031540)                   | 14              | 8            | 1.34     | +           | 5.98            | 3.48E-04    | 1.53E-02 |
| anthocyanin-containing compound biosynthetic process (GO:0009718)             | 17              | 9            | 1.63     | +           | 5.54            | 2.29E-04    | 1.12E-02 |
| regulation of flavonoid biosynthetic process (GO:0009962)                     | 25              | 11           | 2.39     | +           | 4.6             | 1.68E-04    | 9.02E-03 |
| anthocyanin-containing compound metabolic process (GO:0046283)                | 23              | 10           | 2.2      | +           | 4.55            | 3.56E-04    | 1.56E-02 |
| cellular response to hypoxia (GO:0071456)                                     | 29              | 12           | 2.77     | +           | 4.33            | 1.36E-04    | 7.71E-03 |
| cellular response to oxygen levels (GO:0071453)                               | 31              | 12           | 2.96     | +           | 4.05            | 2.23E-04    | 1.12E-02 |
| cellular response to decreased oxygen levels (GO:0036294)                     | 31              | 12           | 2.96     | +           | 4.05            | 2.23E-04    | 1.11E-02 |
| cytokinin metabolic process (GO:0009690)                                      | 41              | 13           | 3.92     | +           | 3.32            | 6.04E-04    | 2.38E-02 |
| response to chitin (GO:0010200)                                               | 137             | 40           | 13.1     | +           | 3.05            | 1.75E-08    | 5.74E-06 |
| pectin catabolic process (GO:0045490)                                         | 97              | 28           | 9.27     | +           | 3.02            | 2.76E-06    | 3.55E-04 |
| flavonoid biosynthetic process (GO:0009813)                                   | 66              | 19           | 6.31     | +           | 3.01            | 1.08E-04    | 6.60E-03 |
| glucan catabolic process (GO:0009251)                                         | 53              | 15           | 5.07     | +           | 2.96            | 6.45E-04    | 2.48E-02 |
| circadian rhythm (GO:0007623)                                                 | 105             | 29           | 10.04    | +           | 2.89            | 3.84E-06    | 4.64E-04 |
| polysaccharide catabolic process (GO:0000272)                                 | 185             | 50           | 17.68    | +           | 2.83            | 3.17E-09    | 1.34E-06 |
| response to hydrogen peroxide (GO:0042542)                                    | 71              | 19           | 6.79     | +           | 2.8             | 2.40E-04    | 1.16E-02 |
| flavonoid metabolic process (GO:0009812)                                      | 76              | 20           | 7.27     | +           | 2.75            | 2.01E-04    | 1.04E-02 |
| cellular hormone metabolic process (GO:0034754)                               | 62              | 16           | 5.93     | +           | 2.7             | 1.00E-03    | 3.53E-02 |
| rhythmic process (GO:0048511)                                                 | 124             | 30           | 11.85    | +           | 2.53            | 3.56E-05    | 2.81E-03 |
| drug catabolic process (GO:0042737)                                           | 253             | 56           | 24.19    | +           | 2.32            | 1.41E-07    | 3.20E-05 |
| carbohydrate catabolic process (GO:0016052)                                   | 293             | 61           | 28.01    | +           | 2.18            | 3.17E-07    | 6.24E-05 |
| response to organonitrogen compound (GO:0010243)                              | 230             | 47           | 21.99    | +           | 2.14            | 9.07E-06    | 8.65E-04 |
| cell wall modification (GO:0042545)                                           | 162             | 33           | 15.49    | +           | 2.13            | 2.83E-04    | 1.31E-02 |
| response to heat (GO:0009408)                                                 | 213             | 43           | 20.36    | +           | 2.11            | 2.98E-05    | 2.42E-03 |
| response to antibiotic (GO:0046677)                                           | 297             | 59           | 28.39    | +           | 2.08            | 1.66E-06    | 2.52E-04 |
| response to salicylic acid (GO:0009751)                                       | 202             | 40           | 19.31    | +           | 2.07            | 8.15E-05    | 5.29E-03 |
| response to jasmonic acid (GO:0009753)                                        | 214             | 42           | 20.46    | +           | 2.05            | 7.67E-05    | 5.15E-03 |
| response to drug (GO:0042493)                                                 | 583             | 109          | 55.73    | +           | 1.96            | 1.34E-09    | 6.11E-07 |
| response to cold (GO:0009409)                                                 | 411             | 72           | 39.29    | +           | 1.83            | 6.74E-06    | 6.99E-04 |
| response to wounding (GO:0009611)                                             | 217             | 38           | 20.74    | +           | 1.83            | 1.11E-03    | 3.82E-02 |
| response to oxidative stress (GO:0006979)                                     | 475             | 78           | 45.41    | +           | 1.72            | 2.52E-05    | 2.16E-03 |
| response to ethylene (GO:0009723)                                             | 305             | 50           | 29.16    | +           | 1.71            | 8.42E-04    | 3.09E-02 |

|                                                                 |       |      |        |   |      |          |          |
|-----------------------------------------------------------------|-------|------|--------|---|------|----------|----------|
| response to temperature stimulus (GO:0009266)                   | 601   | 98   | 57.45  | + | 1.71 | 3.40E-06 | 4.19E-04 |
| regulation of reproductive process (GO:2000241)                 | 358   | 58   | 34.22  | + | 1.69 | 4.22E-04 | 1.81E-02 |
| response to nitrogen compound (GO:1901698)                      | 348   | 56   | 33.27  | + | 1.68 | 5.10E-04 | 2.05E-02 |
| secondary metabolic process (GO:0019748)                        | 521   | 82   | 49.8   | + | 1.65 | 5.60E-05 | 4.03E-03 |
| response to water deprivation (GO:0009414)                      | 338   | 53   | 32.31  | + | 1.64 | 1.48E-03 | 4.89E-02 |
| polysaccharide metabolic process (GO:0005976)                   | 474   | 73   | 45.31  | + | 1.61 | 3.00E-04 | 1.36E-02 |
| cell wall organization (GO:0071555)                             | 546   | 84   | 52.19  | + | 1.61 | 1.07E-04 | 6.56E-03 |
| external encapsulating structure organization (GO:0045229)      | 582   | 89   | 55.64  | + | 1.6  | 7.37E-05 | 5.01E-03 |
| response to oxygen-containing compound (GO:1901700)             | 1594  | 230  | 152.38 | + | 1.51 | 8.54E-09 | 3.16E-06 |
| response to acid chemical (GO:0001101)                          | 1186  | 165  | 113.37 | + | 1.46 | 8.62E-06 | 8.35E-04 |
| cell wall organization or biogenesis (GO:0071554)               | 735   | 101  | 70.26  | + | 1.44 | 9.50E-04 | 3.36E-02 |
| carbohydrate metabolic process (GO:0005975)                     | 1067  | 141  | 102    | + | 1.38 | 3.89E-04 | 1.68E-02 |
| defense response (GO:0006952)                                   | 1583  | 203  | 151.32 | + | 1.34 | 8.15E-05 | 5.35E-03 |
| nucleic acid-templated transcription (GO:0097659)               | 1888  | 238  | 180.48 | + | 1.32 | 5.50E-05 | 4.07E-03 |
| transcription, DNA-templated (GO:0006351)                       | 1888  | 238  | 180.48 | + | 1.32 | 5.50E-05 | 4.02E-03 |
| RNA biosynthetic process (GO:0032774)                           | 1893  | 238  | 180.96 | + | 1.32 | 6.64E-05 | 4.57E-03 |
| response to hormone (GO:0009725)                                | 1815  | 223  | 173.5  | + | 1.29 | 3.44E-04 | 1.53E-02 |
| response to endogenous stimulus (GO:0009719)                    | 1823  | 223  | 174.27 | + | 1.28 | 4.75E-04 | 1.94E-02 |
| regulation of transcription, DNA-templated (GO:0006355)         | 2491  | 300  | 238.12 | + | 1.26 | 1.06E-04 | 6.59E-03 |
| regulation of RNA biosynthetic process (GO:2001141)             | 2493  | 300  | 238.31 | + | 1.26 | 1.22E-04 | 7.16E-03 |
| regulation of nucleic acid-templated transcription (GO:1903506) | 2493  | 300  | 238.31 | + | 1.26 | 1.22E-04 | 7.09E-03 |
| response to organic substance (GO:0010033)                      | 2151  | 257  | 205.62 | + | 1.25 | 6.05E-04 | 2.37E-02 |
| response to abiotic stimulus (GO:0009628)                       | 2082  | 248  | 199.02 | + | 1.25 | 8.75E-04 | 3.15E-02 |
| response to chemical (GO:0042221)                               | 3014  | 359  | 288.12 | + | 1.25 | 4.44E-05 | 3.41E-03 |
| regulation of RNA metabolic process (GO:0051252)                | 2619  | 305  | 250.36 | + | 1.22 | 8.14E-04 | 3.05E-02 |
| response to stress (GO:0006950)                                 | 3635  | 420  | 347.48 | + | 1.21 | 1.13E-04 | 6.72E-03 |
| response to stimulus (GO:0050896)                               | 6446  | 702  | 616.19 | + | 1.14 | 1.99E-04 | 1.04E-02 |
| cellular process (GO:0009987)                                   | 12555 | 1091 | 1200.2 | - | 0.91 | 4.46E-05 | 3.38E-03 |
| primary metabolic process (GO:0044238)                          | 9223  | 788  | 881.65 | - | 0.89 | 2.10E-04 | 1.08E-02 |
| cellular metabolic process (GO:0044237)                         | 9524  | 802  | 910.43 | - | 0.88 | 1.86E-05 | 1.69E-03 |
| macromolecule metabolic process (GO:0043170)                    | 7271  | 605  | 695.06 | - | 0.87 | 1.26E-04 | 7.21E-03 |

|                                                               |      |     |        |   |      |          |          |
|---------------------------------------------------------------|------|-----|--------|---|------|----------|----------|
| cellular aromatic compound metabolic process (GO:0006725)     | 4370 | 345 | 417.74 | - | 0.83 | 1.65E-04 | 8.94E-03 |
| nitrogen compound metabolic process (GO:0006807)              | 8015 | 627 | 766.18 | - | 0.82 | 6.39E-09 | 2.52E-06 |
| nucleic acid metabolic process (GO:0090304)                   | 3438 | 263 | 328.65 | - | 0.8  | 1.47E-04 | 8.27E-03 |
| organic cyclic compound metabolic process (GO:1901360)        | 4493 | 343 | 429.5  | - | 0.8  | 7.46E-06 | 7.60E-04 |
| organonitrogen compound metabolic process (GO:1901564)        | 4900 | 373 | 468.41 | - | 0.8  | 1.94E-06 | 2.80E-04 |
| heterocycle metabolic process (GO:0046483)                    | 4196 | 318 | 401.11 | - | 0.79 | 1.04E-05 | 9.74E-04 |
| localization (GO:0051179)                                     | 2633 | 198 | 251.7  | - | 0.79 | 4.65E-04 | 1.92E-02 |
| protein metabolic process (GO:0019538)                        | 3702 | 276 | 353.89 | - | 0.78 | 1.20E-05 | 1.11E-03 |
| cellular protein metabolic process (GO:0044267)               | 3337 | 240 | 318.99 | - | 0.75 | 2.93E-06 | 3.69E-04 |
| nucleobase-containing compound metabolic process (GO:0006139) | 3878 | 278 | 370.71 | - | 0.75 | 2.92E-07 | 6.16E-05 |
| cellular nitrogen compound metabolic process (GO:0034641)     | 4767 | 335 | 455.69 | - | 0.74 | 7.19E-10 | 3.86E-07 |
| macromolecule modification (GO:0043412)                       | 2842 | 197 | 271.68 | - | 0.73 | 2.00E-06 | 2.75E-04 |
| cellular component organization (GO:0016043)                  | 2799 | 191 | 267.56 | - | 0.71 | 8.44E-07 | 1.43E-04 |
| small molecule metabolic process (GO:0044281)                 | 1751 | 117 | 167.38 | - | 0.7  | 5.65E-05 | 4.02E-03 |
| macromolecule localization (GO:0033036)                       | 1134 | 74  | 108.4  | - | 0.68 | 8.44E-04 | 3.08E-02 |
| cellular component organization or biogenesis (GO:0071840)    | 3161 | 201 | 302.17 | - | 0.67 | 4.36E-10 | 2.58E-07 |
| amide transport (GO:0042886)                                  | 837  | 52  | 80.01  | - | 0.65 | 1.37E-03 | 4.60E-02 |
| carboxylic acid metabolic process (GO:0019752)                | 999  | 60  | 95.5   | - | 0.63 | 1.95E-04 | 1.03E-02 |
| peptide transport (GO:0015833)                                | 822  | 49  | 78.58  | - | 0.62 | 6.26E-04 | 2.42E-02 |
| embryo development (GO:0009790)                               | 574  | 31  | 54.87  | - | 0.56 | 1.01E-03 | 3.52E-02 |
| embryo development ending in seed dormancy (GO:0009793)       | 557  | 30  | 53.25  | - | 0.56 | 1.10E-03 | 3.82E-02 |
| organic acid biosynthetic process (GO:0016053)                | 580  | 31  | 55.44  | - | 0.56 | 8.17E-04 | 3.04E-02 |
| carboxylic acid biosynthetic process (GO:0046394)             | 580  | 31  | 55.44  | - | 0.56 | 8.17E-04 | 3.02E-02 |
| cellular localization (GO:0051641)                            | 918  | 47  | 87.75  | - | 0.54 | 4.28E-06 | 4.86E-04 |
| cellular macromolecule localization (GO:0070727)              | 688  | 35  | 65.77  | - | 0.53 | 7.68E-05 | 5.10E-03 |
| cellular protein localization (GO:0034613)                    | 655  | 33  | 62.61  | - | 0.53 | 9.14E-05 | 5.81E-03 |
| small molecule biosynthetic process (GO:0044283)              | 757  | 38  | 72.36  | - | 0.53 | 2.39E-05 | 2.11E-03 |
| intracellular protein transport (GO:0006886)                  | 560  | 28  | 53.53  | - | 0.52 | 2.81E-04 | 1.31E-02 |
| regulation of cellular component organization (GO:0051128)    | 445  | 22  | 42.54  | - | 0.52 | 1.20E-03 | 4.05E-02 |
| carbohydrate derivative biosynthetic process (GO:1901137)     | 536  | 26  | 51.24  | - | 0.51 | 2.69E-04 | 1.27E-02 |
| protein transport (GO:0015031)                                | 763  | 37  | 72.94  | - | 0.51 | 8.09E-06 | 7.97E-04 |

|                                                                     |      |    |        |   |      |          |          |
|---------------------------------------------------------------------|------|----|--------|---|------|----------|----------|
| protein localization (GO:0008104)                                   | 847  | 41 | 80.97  | - | 0.51 | 2.27E-06 | 2.99E-04 |
| establishment of protein localization (GO:0045184)                  | 771  | 37 | 73.7   | - | 0.5  | 6.43E-06 | 6.79E-04 |
| ubiquitin-dependent protein catabolic process (GO:0006511)          | 460  | 22 | 43.97  | - | 0.5  | 5.91E-04 | 2.34E-02 |
| cellular amide metabolic process (GO:0043603)                       | 820  | 39 | 78.39  | - | 0.5  | 2.10E-06 | 2.83E-04 |
| establishment of localization in cell (GO:0051649)                  | 740  | 35 | 70.74  | - | 0.49 | 7.60E-06 | 7.61E-04 |
| organonitrogen compound biosynthetic process (GO:1901566)           | 1571 | 74 | 150.18 | - | 0.49 | 1.63E-11 | 1.93E-08 |
| organophosphate metabolic process (GO:0019637)                      | 610  | 28 | 58.31  | - | 0.48 | 2.61E-05 | 2.17E-03 |
| intracellular transport (GO:0046907)                                | 699  | 32 | 66.82  | - | 0.48 | 5.74E-06 | 6.18E-04 |
| cellular component assembly (GO:0022607)                            | 788  | 36 | 75.33  | - | 0.48 | 1.27E-06 | 2.02E-04 |
| cellular component biogenesis (GO:0044085)                          | 1309 | 58 | 125.13 | - | 0.46 | 7.08E-11 | 4.65E-08 |
| vesicle-mediated transport (GO:0016192)                             | 499  | 22 | 47.7   | - | 0.46 | 8.22E-05 | 5.28E-03 |
| peptide metabolic process (GO:0006518)                              | 726  | 32 | 69.4   | - | 0.46 | 1.66E-06 | 2.46E-04 |
| cellular amino acid metabolic process (GO:0006520)                  | 427  | 18 | 40.82  | - | 0.44 | 1.76E-04 | 9.36E-03 |
| organelle organization (GO:0006996)                                 | 1645 | 67 | 157.25 | - | 0.43 | 1.74E-15 | 5.13E-12 |
| organophosphate biosynthetic process (GO:0090407)                   | 402  | 16 | 38.43  | - | 0.42 | 1.11E-04 | 6.71E-03 |
| alpha-amino acid metabolic process (GO:1901605)                     | 303  | 12 | 28.96  | - | 0.41 | 8.63E-04 | 3.13E-02 |
| peptidyl-amino acid modification (GO:0018193)                       | 354  | 14 | 33.84  | - | 0.41 | 2.70E-04 | 1.27E-02 |
| mRNA metabolic process (GO:0016071)                                 | 523  | 20 | 50     | - | 0.4  | 4.95E-06 | 5.42E-04 |
| amide biosynthetic process (GO:0043604)                             | 687  | 25 | 65.67  | - | 0.38 | 3.92E-08 | 1.10E-05 |
| translation (GO:0006412)                                            | 620  | 21 | 59.27  | - | 0.35 | 3.85E-08 | 1.14E-05 |
| proteasomal protein catabolic process (GO:0010498)                  | 296  | 10 | 28.3   | - | 0.35 | 2.16E-04 | 1.09E-02 |
| peptide biosynthetic process (GO:0043043)                           | 625  | 21 | 59.75  | - | 0.35 | 2.87E-08 | 8.93E-06 |
| cellular protein-containing complex assembly (GO:0034622)           | 508  | 17 | 48.56  | - | 0.35 | 6.83E-07 | 1.19E-04 |
| protein-containing complex subunit organization (GO:0043933)        | 645  | 21 | 61.66  | - | 0.34 | 8.79E-09 | 3.06E-06 |
| establishment of protein localization to organelle (GO:0072594)     | 246  | 8  | 23.52  | - | 0.34 | 7.04E-04 | 2.67E-02 |
| protein-containing complex assembly (GO:0065003)                    | 554  | 18 | 52.96  | - | 0.34 | 1.19E-07 | 2.94E-05 |
| nucleobase-containing small molecule metabolic process (GO:0055086) | 462  | 15 | 44.16  | - | 0.34 | 1.61E-06 | 2.50E-04 |
| regulation of organelle organization (GO:0033043)                   | 278  | 9  | 26.57  | - | 0.34 | 2.12E-04 | 1.08E-02 |
| nucleotide metabolic process (GO:0009117)                           | 342  | 11 | 32.69  | - | 0.34 | 3.75E-05 | 2.91E-03 |
| nucleoside phosphate metabolic process (GO:0006753)                 | 346  | 11 | 33.08  | - | 0.33 | 2.76E-05 | 2.27E-03 |

|                                                                                                   |     |    |       |   |      |          |          |
|---------------------------------------------------------------------------------------------------|-----|----|-------|---|------|----------|----------|
| proteasome-mediated ubiquitin-dependent protein catabolic process (GO:0043161)                    | 284 | 9  | 27.15 | - | 0.33 | 1.57E-04 | 8.59E-03 |
| cell cycle (GO:0007049)                                                                           | 568 | 18 | 54.3  | - | 0.33 | 4.84E-08 | 1.30E-05 |
| purine ribonucleotide metabolic process (GO:0009150)                                              | 221 | 7  | 21.13 | - | 0.33 | 9.06E-04 | 3.23E-02 |
| chromosome organization (GO:0051276)                                                              | 544 | 17 | 52    | - | 0.33 | 6.22E-08 | 1.60E-05 |
| purine-containing compound metabolic process (GO:0072521)                                         | 261 | 8  | 24.95 | - | 0.32 | 2.88E-04 | 1.32E-02 |
| purine nucleotide metabolic process (GO:0006163)                                                  | 230 | 7  | 21.99 | - | 0.32 | 6.90E-04 | 2.63E-02 |
| protein localization to organelle (GO:0033365)                                                    | 299 | 9  | 28.58 | - | 0.31 | 6.31E-05 | 4.44E-03 |
| cell cycle process (GO:0022402)                                                                   | 374 | 11 | 35.75 | - | 0.31 | 4.41E-06 | 4.92E-04 |
| ribose phosphate metabolic process (GO:0019693)                                                   | 275 | 8  | 26.29 | - | 0.3  | 1.14E-04 | 6.72E-03 |
| ribonucleotide metabolic process (GO:0009259)                                                     | 241 | 7  | 23.04 | - | 0.3  | 2.64E-04 | 1.26E-02 |
| microtubule-based process (GO:0007017)                                                            | 216 | 6  | 20.65 | - | 0.29 | 4.64E-04 | 1.93E-02 |
| chromatin organization (GO:0006325)                                                               | 361 | 10 | 34.51 | - | 0.29 | 4.26E-06 | 4.93E-04 |
| organelle assembly (GO:0070925)                                                                   | 217 | 6  | 20.74 | - | 0.29 | 4.69E-04 | 1.93E-02 |
| nucleotide biosynthetic process (GO:0009165)                                                      | 219 | 6  | 20.93 | - | 0.29 | 3.37E-04 | 1.52E-02 |
| mRNA splicing, via spliceosome (GO:0000398)                                                       | 184 | 5  | 17.59 | - | 0.28 | 1.11E-03 | 3.81E-02 |
| nucleoside phosphate biosynthetic process (GO:1901293)                                            | 221 | 6  | 21.13 | - | 0.28 | 3.38E-04 | 1.52E-02 |
| alpha-amino acid biosynthetic process (GO:1901607)                                                | 188 | 5  | 17.97 | - | 0.28 | 1.17E-03 | 3.97E-02 |
| cellular response to DNA damage stimulus (GO:0006974)                                             | 351 | 9  | 33.55 | - | 0.27 | 1.96E-06 | 2.76E-04 |
| mRNA processing (GO:0006397)                                                                      | 393 | 10 | 37.57 | - | 0.27 | 4.46E-07 | 8.25E-05 |
| RNA splicing, via transesterification reactions with bulged adenosine as nucleophile (GO:0000377) | 201 | 5  | 19.21 | - | 0.26 | 4.32E-04 | 1.84E-02 |
| RNA splicing, via transesterification reactions (GO:0000375)                                      | 201 | 5  | 19.21 | - | 0.26 | 4.32E-04 | 1.82E-02 |
| purine nucleotide biosynthetic process (GO:0006164)                                               | 166 | 4  | 15.87 | - | 0.25 | 1.45E-03 | 4.82E-02 |
| cellular amino acid biosynthetic process (GO:0008652)                                             | 212 | 5  | 20.27 | - | 0.25 | 1.57E-04 | 8.67E-03 |
| histone modification (GO:0016570)                                                                 | 171 | 4  | 16.35 | - | 0.24 | 1.05E-03 | 3.65E-02 |
| covalent chromatin modification (GO:0016569)                                                      | 176 | 4  | 16.82 | - | 0.24 | 7.57E-04 | 2.85E-02 |
| ribonucleotide biosynthetic process (GO:0009260)                                                  | 179 | 4  | 17.11 | - | 0.23 | 5.23E-04 | 2.09E-02 |
| ribose phosphate biosynthetic process (GO:0046390)                                                | 184 | 4  | 17.59 | - | 0.23 | 3.75E-04 | 1.63E-02 |
| Golgi vesicle transport (GO:0048193)                                                              | 187 | 4  | 17.88 | - | 0.22 | 2.62E-04 | 1.26E-02 |
| DNA metabolic process (GO:0006259)                                                                | 537 | 11 | 51.33 | - | 0.21 | 6.54E-11 | 4.83E-08 |
| methylation (GO:0032259)                                                                          | 342 | 7  | 32.69 | - | 0.21 | 2.71E-07 | 5.94E-05 |
| organelle fission (GO:0048285)                                                                    | 201 | 4  | 19.21 | - | 0.21 | 9.40E-05 | 5.91E-03 |
| regulation of cell cycle process (GO:0010564)                                                     | 154 | 3  | 14.72 | - | 0.2  | 8.94E-04 | 3.20E-02 |

|                                                                     |     |    |       |   |        |          |          |
|---------------------------------------------------------------------|-----|----|-------|---|--------|----------|----------|
| nuclear division (GO:0000280)                                       | 156 | 3  | 14.91 | - | 0.2    | 6.07E-04 | 2.36E-02 |
| ribonucleoprotein complex assembly (GO:0022618)                     | 212 | 4  | 20.27 | - | 0.2    | 4.80E-05 | 3.59E-03 |
| mitotic cell cycle (GO:0000278)                                     | 268 | 5  | 25.62 | - | 0.2    | 3.96E-06 | 4.68E-04 |
| DNA repair (GO:0006281)                                             | 322 | 6  | 30.78 | - | 0.19   | 3.14E-07 | 6.40E-05 |
| ribosome biogenesis (GO:0042254)                                    | 440 | 8  | 42.06 | - | 0.19   | 1.01E-09 | 4.99E-07 |
| ribonucleoprotein complex subunit organization (GO:0071826)         | 221 | 4  | 21.13 | - | 0.19   | 2.38E-05 | 2.13E-03 |
| RNA splicing (GO:0008380)                                           | 285 | 5  | 27.24 | - | 0.18   | 9.44E-07 | 1.55E-04 |
| ribonucleoprotein complex biogenesis (GO:0022613)                   | 532 | 9  | 50.86 | - | 0.18   | 4.92E-12 | 7.28E-09 |
| RNA processing (GO:0006396)                                         | 819 | 13 | 78.29 | - | 0.17   | 8.70E-19 | 5.15E-15 |
| mitotic cell cycle process (GO:1903047)                             | 199 | 3  | 19.02 | - | 0.16   | 2.53E-05 | 2.14E-03 |
| RNA modification (GO:0009451)                                       | 441 | 6  | 42.16 | - | 0.14   | 2.86E-11 | 2.42E-08 |
| nucleobase-containing compound transport (GO:0015931)               | 147 | 2  | 14.05 | - | 0.14   | 2.24E-04 | 1.11E-02 |
| tRNA metabolic process (GO:0006399)                                 | 176 | 2  | 16.82 | - | 0.12   | 2.46E-05 | 2.14E-03 |
| RNA localization (GO:0006403)                                       | 104 | 1  | 9.94  | - | 0.1    | 1.43E-03 | 4.79E-02 |
| ncRNA metabolic process (GO:0034660)                                | 421 | 4  | 40.24 | - | 0.1    | 2.29E-12 | 4.50E-09 |
| rRNA processing (GO:0006364)                                        | 228 | 2  | 21.8  | - | 0.09   | 4.09E-07 | 7.81E-05 |
| DNA-dependent DNA replication (GO:0006261)                          | 117 | 1  | 11.18 | - | 0.09   | 4.53E-04 | 1.90E-02 |
| rRNA metabolic process (GO:0016072)                                 | 241 | 2  | 23.04 | - | 0.09   | 1.29E-07 | 3.04E-05 |
| DNA replication (GO:0006260)                                        | 148 | 1  | 14.15 | - | 0.07   | 3.04E-05 | 2.43E-03 |
| ncRNA processing (GO:0034470)                                       | 343 | 2  | 32.79 | - | 0.06   | 1.75E-11 | 1.73E-08 |
| positive regulation of organelle organization (GO:0010638)          | 88  | 0  | 8.41  | - | < 0.01 | 4.96E-04 | 2.01E-02 |
| tRNA processing (GO:0008033)                                        | 104 | 0  | 9.94  | - | < 0.01 | 1.52E-04 | 8.47E-03 |
| positive regulation of cellular component organization (GO:0051130) | 112 | 0  | 10.71 | - | < 0.01 | 6.57E-05 | 4.57E-03 |
| macromolecule methylation (GO:0043414)                              | 167 | 0  | 15.96 | - | < 0.01 | 5.36E-07 | 9.60E-05 |

| Analysis Type: PANTHER Overrepresentation Test (Released 2017-12-05)          |                 |             |          |            |                 |             |          |
|-------------------------------------------------------------------------------|-----------------|-------------|----------|------------|-----------------|-------------|----------|
| Annotation Version and Release Date: GO Ontology database Released 2018-05-21 |                 |             |          |            |                 |             |          |
| Analyzed List: Trisomy5_outliers (Arabidopsis thaliana)                       |                 |             |          |            |                 |             |          |
| Reference List: Arabidopsis thaliana (all genes in database)                  |                 |             |          |            |                 |             |          |
| Test Type: FISHER                                                             |                 |             |          |            |                 |             |          |
| GO biological process complete                                                | REFLIST (27502) | Input(2217) | expected | over/under | fold Enrichment | raw P-value | FDR      |
| response to herbivore (GO:0080027)                                            | 14              | 7           | 1.13     | +          | 6.2             | 5.82E-04    | 3.07E-02 |
| vernalization response (GO:0010048)                                           | 36              | 11          | 2.9      | +          | 3.79            | 5.49E-04    | 2.93E-02 |
| pectin catabolic process (GO:0045490)                                         | 97              | 27          | 7.82     | +          | 3.45            | 3.65E-07    | 5.68E-05 |
| flavonoid biosynthetic process (GO:0009813)                                   | 66              | 15          | 5.32     | +          | 2.82            | 8.72E-04    | 4.44E-02 |
| drug catabolic process (GO:0042737)                                           | 253             | 48          | 20.39    | +          | 2.35            | 6.67E-07    | 9.18E-05 |
| polysaccharide catabolic process (GO:0000272)                                 | 185             | 34          | 14.91    | +          | 2.28            | 4.47E-05    | 3.67E-03 |
| positive regulation of transcription by RNA polymerase II (GO:0045944)        | 203             | 33          | 16.36    | +          | 2.02            | 4.37E-04    | 2.46E-02 |
| regulation of transcription by RNA polymerase II (GO:0006357)                 | 501             | 75          | 40.39    | +          | 1.86            | 2.68E-06    | 3.05E-04 |
| secondary metabolic process (GO:0019748)                                      | 521             | 72          | 42       | +          | 1.71            | 4.95E-05    | 3.96E-03 |
| external encapsulating structure organization (GO:0045229)                    | 582             | 78          | 46.92    | +          | 1.66            | 6.38E-05    | 4.84E-03 |
| cell wall organization (GO:0071555)                                           | 546             | 72          | 44.01    | +          | 1.64            | 1.86E-04    | 1.14E-02 |
| metabolic process (GO:0008152)                                                | 11121           | 807         | 896.49   | -          | 0.9             | 1.84E-04    | 1.15E-02 |
| organic substance metabolic process (GO:0071704)                              | 9935            | 692         | 800.88   | -          | 0.86            | 2.90E-06    | 3.24E-04 |
| primary metabolic process (GO:0044238)                                        | 9223            | 626         | 743.49   | -          | 0.84            | 2.74E-07    | 4.50E-05 |
| cellular process (GO:0009987)                                                 | 12555           | 838         | 1012.09  | -          | 0.83            | 7.10E-13    | 8.39E-10 |
| cellular metabolic process (GO:0044237)                                       | 9524            | 626         | 767.75   | -          | 0.82            | 6.55E-10    | 2.15E-07 |
| RNA metabolic process (GO:0016070)                                            | 3039            | 194         | 244.98   | -          | 0.79            | 6.59E-04    | 3.42E-02 |
| cellular macromolecule metabolic process (GO:0044260)                         | 5910            | 375         | 476.42   | -          | 0.79            | 2.35E-07    | 4.08E-05 |
| gene expression (GO:0010467)                                                  | 3289            | 206         | 265.13   | -          | 0.78            | 1.40E-04    | 8.90E-03 |
| macromolecule metabolic process (GO:0043170)                                  | 7271            | 450         | 586.13   | -          | 0.77            | 9.20E-11    | 4.53E-08 |
| organic cyclic compound metabolic process (GO:1901360)                        | 4493            | 270         | 362.19   | -          | 0.75            | 1.33E-07    | 2.55E-05 |
| localization (GO:0051179)                                                     | 2633            | 157         | 212.25   | -          | 0.74            | 6.92E-05    | 5.18E-03 |
| establishment of localization (GO:0051234)                                    | 2500            | 149         | 201.53   | -          | 0.74            | 1.05E-04    | 7.16E-03 |
| cellular aromatic compound metabolic process (GO:0006725)                     | 4370            | 260         | 352.28   | -          | 0.74            | 9.50E-08    | 1.87E-05 |
| transport (GO:0006810)                                                        | 2455            | 146         | 197.9    | -          | 0.74            | 1.26E-04    | 8.37E-03 |
| nucleic acid metabolic process (GO:0090304)                                   | 3438            | 203         | 277.15   | -          | 0.73            | 1.99E-06    | 2.40E-04 |
| small molecule metabolic process (GO:0044281)                                 | 1751            | 101         | 141.15   | -          | 0.72            | 5.08E-04    | 2.78E-02 |



|                                                               |      |     |        |   |      |          |          |
|---------------------------------------------------------------|------|-----|--------|---|------|----------|----------|
| nitrogen compound metabolic process (GO:0006807)              | 8015 | 460 | 646.11 | - | 0.71 | 4.94E-18 | 2.92E-14 |
| heterocycle metabolic process (GO:0046483)                    | 4196 | 237 | 338.25 | - | 0.7  | 1.71E-09 | 5.34E-07 |
| nucleobase-containing compound metabolic process (GO:0006139) | 3878 | 217 | 312.61 | - | 0.69 | 4.26E-09 | 1.14E-06 |
| phosphate-containing compound metabolic process (GO:0006796)  | 1844 | 101 | 148.65 | - | 0.68 | 4.68E-05 | 3.79E-03 |
| phosphorus metabolic process (GO:0006793)                     | 1917 | 104 | 154.53 | - | 0.67 | 2.03E-05 | 1.84E-03 |
| cellular nitrogen compound metabolic process (GO:0034641)     | 4767 | 258 | 384.28 | - | 0.67 | 8.81E-13 | 7.44E-10 |
| organonitrogen compound metabolic process (GO:1901564)        | 4900 | 262 | 395    | - | 0.66 | 7.44E-14 | 1.10E-10 |
| protein metabolic process (GO:0019538)                        | 3702 | 197 | 298.43 | - | 0.66 | 1.61E-10 | 5.96E-08 |
| protein modification process (GO:0036211)                     | 2360 | 125 | 190.25 | - | 0.66 | 4.77E-07 | 7.05E-05 |
| cellular protein modification process (GO:0006464)            | 2360 | 125 | 190.25 | - | 0.66 | 4.77E-07 | 6.88E-05 |
| cellular component organization (GO:0016043)                  | 2799 | 146 | 225.63 | - | 0.65 | 1.17E-08 | 2.88E-06 |
| cellular protein metabolic process (GO:0044267)               | 3337 | 171 | 269    | - | 0.64 | 8.71E-11 | 5.15E-08 |
| cellular response to stress (GO:0033554)                      | 967  | 49  | 77.95  | - | 0.63 | 8.02E-04 | 4.12E-02 |
| cellular component organization or biogenesis (GO:0071840)    | 3161 | 158 | 254.82 | - | 0.62 | 3.84E-11 | 2.52E-08 |
| macromolecule localization (GO:0033036)                       | 1134 | 55  | 91.41  | - | 0.6  | 7.58E-05 | 5.47E-03 |
| carbohydrate derivative metabolic process (GO:1901135)        | 867  | 42  | 69.89  | - | 0.6  | 5.23E-04 | 2.84E-02 |
| nitrogen compound transport (GO:0071705)                      | 1052 | 50  | 84.8   | - | 0.59 | 8.52E-05 | 6.07E-03 |
| macromolecule modification (GO:0043412)                       | 2842 | 130 | 229.1  | - | 0.57 | 7.46E-13 | 7.35E-10 |
| negative regulation of biological process (GO:0048519)        | 1036 | 46  | 83.51  | - | 0.55 | 1.55E-05 | 1.45E-03 |
| regulation of response to stimulus (GO:0048583)               | 656  | 28  | 52.88  | - | 0.53 | 3.82E-04 | 2.19E-02 |
| peptide metabolic process (GO:0006518)                        | 726  | 29  | 58.52  | - | 0.5  | 4.30E-05 | 3.58E-03 |
| cellular component biogenesis (GO:0044085)                    | 1309 | 52  | 105.52 | - | 0.49 | 1.79E-08 | 4.08E-06 |
| amide transport (GO:0042886)                                  | 837  | 33  | 67.47  | - | 0.49 | 7.53E-06 | 7.30E-04 |
| organophosphate metabolic process (GO:0019637)                | 610  | 24  | 49.17  | - | 0.49 | 1.65E-04 | 1.04E-02 |
| organonitrogen compound biosynthetic process (GO:1901566)     | 1571 | 60  | 126.64 | - | 0.47 | 8.73E-11 | 4.70E-08 |
| cellular localization (GO:0051641)                            | 918  | 35  | 74     | - | 0.47 | 1.19E-06 | 1.57E-04 |
| vesicle-mediated transport (GO:0016192)                       | 499  | 19  | 40.23  | - | 0.47 | 4.96E-04 | 2.77E-02 |
| cellular amide metabolic process (GO:0043603)                 | 820  | 31  | 66.1   | - | 0.47 | 3.22E-06 | 3.53E-04 |
| peptide transport (GO:0015833)                                | 822  | 31  | 66.26  | - | 0.47 | 3.23E-06 | 3.47E-04 |
| cell cycle (GO:0007049)                                       | 568  | 21  | 45.79  | - | 0.46 | 9.50E-05 | 6.61E-03 |

|                                                                                 |      |    |        |   |      |          |          |
|---------------------------------------------------------------------------------|------|----|--------|---|------|----------|----------|
| negative regulation of cellular process (GO:0048523)                            | 675  | 24 | 54.41  | - | 0.44 | 1.06E-05 | 1.01E-03 |
| cellular component assembly (GO:0022607)                                        | 788  | 28 | 63.52  | - | 0.44 | 1.38E-06 | 1.74E-04 |
| translation (GO:0006412)                                                        | 620  | 22 | 49.98  | - | 0.44 | 2.57E-05 | 2.26E-03 |
| negative regulation of macromolecule metabolic process (GO:0010605)             | 592  | 21 | 47.72  | - | 0.44 | 3.41E-05 | 2.92E-03 |
| peptide biosynthetic process (GO:0043043)                                       | 625  | 22 | 50.38  | - | 0.44 | 1.96E-05 | 1.81E-03 |
| establishment of localization in cell (GO:0051649)                              | 740  | 25 | 59.65  | - | 0.42 | 1.23E-06 | 1.59E-04 |
| amide biosynthetic process (GO:0043604)                                         | 687  | 23 | 55.38  | - | 0.42 | 2.22E-06 | 2.62E-04 |
| negative regulation of gene expression (GO:0010629)                             | 484  | 16 | 39.02  | - | 0.41 | 7.07E-05 | 5.22E-03 |
| negative regulation of metabolic process (GO:0009892)                           | 637  | 21 | 51.35  | - | 0.41 | 4.05E-06 | 4.27E-04 |
| protein transport (GO:0015031)                                                  | 763  | 25 | 61.51  | - | 0.41 | 4.20E-07 | 6.36E-05 |
| establishment of protein localization (GO:0045184)                              | 771  | 25 | 62.15  | - | 0.4  | 2.37E-07 | 4.01E-05 |
| protein localization (GO:0008104)                                               | 847  | 27 | 68.28  | - | 0.4  | 4.43E-08 | 9.36E-06 |
| intracellular transport (GO:0046907)                                            | 699  | 22 | 56.35  | - | 0.39 | 5.86E-07 | 8.25E-05 |
| cellular protein localization (GO:0034613)                                      | 655  | 20 | 52.8   | - | 0.38 | 7.94E-07 | 1.07E-04 |
| cellular macromolecule localization (GO:0070727)                                | 688  | 21 | 55.46  | - | 0.38 | 3.33E-07 | 5.31E-05 |
| chromatin organization (GO:0006325)                                             | 361  | 11 | 29.1   | - | 0.38 | 3.14E-04 | 1.82E-02 |
| organelle organization (GO:0006996)                                             | 1645 | 50 | 132.61 | - | 0.38 | 6.53E-16 | 1.93E-12 |
| intracellular protein transport (GO:0006886)                                    | 560  | 17 | 45.14  | - | 0.38 | 4.32E-06 | 4.48E-04 |
| nucleobase-containing small molecule metabolic process (GO:0055086)             | 462  | 14 | 37.24  | - | 0.38 | 3.18E-05 | 2.76E-03 |
| negative regulation of cellular metabolic process (GO:0031324)                  | 436  | 13 | 35.15  | - | 0.37 | 5.77E-05 | 4.43E-03 |
| negative regulation of nitrogen compound metabolic process (GO:0051172)         | 404  | 12 | 32.57  | - | 0.37 | 1.01E-04 | 6.92E-03 |
| DNA repair (GO:0006281)                                                         | 322  | 9  | 25.96  | - | 0.35 | 3.10E-04 | 1.82E-02 |
| purine-containing compound metabolic process (GO:0072521)                       | 261  | 7  | 21.04  | - | 0.33 | 9.74E-04 | 4.88E-02 |
| protein localization to organelle (GO:0033365)                                  | 299  | 8  | 24.1   | - | 0.33 | 4.12E-04 | 2.35E-02 |
| cell cycle process (GO:0022402)                                                 | 374  | 10 | 30.15  | - | 0.33 | 5.35E-05 | 4.16E-03 |
| nucleotide metabolic process (GO:0009117)                                       | 342  | 9  | 27.57  | - | 0.33 | 1.30E-04 | 8.56E-03 |
| response to cadmium ion (GO:0046686)                                            | 342  | 9  | 27.57  | - | 0.33 | 1.30E-04 | 8.47E-03 |
| methylation (GO:0032259)                                                        | 342  | 9  | 27.57  | - | 0.33 | 1.30E-04 | 8.38E-03 |
| negative regulation of cellular macromolecule biosynthetic process (GO:2000113) | 307  | 8  | 24.75  | - | 0.32 | 2.23E-04 | 1.34E-02 |
| nucleoside phosphate metabolic process (GO:0006753)                             | 346  | 9  | 27.89  | - | 0.32 | 9.47E-05 | 6.67E-03 |

|                                                                                      |     |    |       |   |        |          |          |
|--------------------------------------------------------------------------------------|-----|----|-------|---|--------|----------|----------|
| peptidyl-amino acid modification (GO:0018193)                                        | 354 | 9  | 28.54 | - | 0.32   | 7.21E-05 | 5.26E-03 |
| negative regulation of macromolecule biosynthetic process (GO:0010558)               | 323 | 8  | 26.04 | - | 0.31   | 1.25E-04 | 8.41E-03 |
| negative regulation of nucleobase-containing compound metabolic process (GO:0045934) | 292 | 7  | 23.54 | - | 0.3    | 2.17E-04 | 1.32E-02 |
| chromosome organization (GO:0051276)                                                 | 544 | 13 | 43.85 | - | 0.3    | 1.41E-07 | 2.61E-05 |
| plastid organization (GO:0009657)                                                    | 253 | 6  | 20.39 | - | 0.29   | 5.01E-04 | 2.77E-02 |
| negative regulation of cellular biosynthetic process (GO:0031327)                    | 343 | 8  | 27.65 | - | 0.29   | 3.52E-05 | 2.97E-03 |
| negative regulation of biosynthetic process (GO:0009890)                             | 348 | 8  | 28.05 | - | 0.29   | 2.56E-05 | 2.29E-03 |
| mRNA metabolic process (GO:0016071)                                                  | 523 | 12 | 42.16 | - | 0.28   | 1.81E-07 | 3.24E-05 |
| DNA metabolic process (GO:0006259)                                                   | 537 | 12 | 43.29 | - | 0.28   | 6.83E-08 | 1.39E-05 |
| protein-containing complex subunit organization (GO:0043933)                         | 645 | 14 | 51.99 | - | 0.27   | 1.88E-09 | 5.57E-07 |
| mRNA processing (GO:0006397)                                                         | 393 | 8  | 31.68 | - | 0.25   | 1.98E-06 | 2.44E-04 |
| ribonucleoprotein complex assembly (GO:0022618)                                      | 212 | 4  | 17.09 | - | 0.23   | 5.88E-04 | 3.08E-02 |
| ribonucleoprotein complex subunit organization (GO:0071826)                          | 221 | 4  | 17.82 | - | 0.22   | 2.91E-04 | 1.72E-02 |
| protein-containing complex assembly (GO:0065003)                                     | 554 | 10 | 44.66 | - | 0.22   | 1.92E-09 | 5.41E-07 |
| cellular protein-containing complex assembly (GO:0034622)                            | 508 | 9  | 40.95 | - | 0.22   | 8.61E-09 | 2.21E-06 |
| tRNA metabolic process (GO:0006399)                                                  | 176 | 3  | 14.19 | - | 0.21   | 9.23E-04 | 4.66E-02 |
| organelle fission (GO:0048285)                                                       | 201 | 3  | 16.2  | - | 0.19   | 2.36E-04 | 1.41E-02 |
| RNA processing (GO:0006396)                                                          | 819 | 12 | 66.02 | - | 0.18   | 2.27E-15 | 4.47E-12 |
| proteasome-mediated ubiquitin-dependent protein catabolic process (GO:0043161)       | 284 | 4  | 22.89 | - | 0.17   | 4.58E-06 | 4.59E-04 |
| RNA splicing (GO:0008380)                                                            | 285 | 4  | 22.97 | - | 0.17   | 4.61E-06 | 4.54E-04 |
| proteasomal protein catabolic process (GO:0010498)                                   | 296 | 4  | 23.86 | - | 0.17   | 2.28E-06 | 2.65E-04 |
| ribonucleoprotein complex biogenesis (GO:0022613)                                    | 532 | 6  | 42.89 | - | 0.14   | 1.22E-11 | 9.01E-09 |
| ncRNA metabolic process (GO:0034660)                                                 | 421 | 4  | 33.94 | - | 0.12   | 5.73E-10 | 1.99E-07 |
| ribosome biogenesis (GO:0042254)                                                     | 440 | 4  | 35.47 | - | 0.11   | 1.25E-10 | 5.69E-08 |
| RNA modification (GO:0009451)                                                        | 441 | 4  | 35.55 | - | 0.11   | 1.27E-10 | 5.35E-08 |
| mitochondrion organization (GO:0007005)                                              | 171 | 1  | 13.78 | - | 0.07   | 5.27E-05 | 4.15E-03 |
| ncRNA processing (GO:0034470)                                                        | 343 | 1  | 27.65 | - | 0.04   | 1.42E-10 | 5.62E-08 |
| rRNA processing (GO:0006364)                                                         | 228 | 0  | 18.38 | - | < 0.01 | 3.46E-08 | 7.58E-06 |
| rRNA metabolic process (GO:0016072)                                                  | 241 | 0  | 19.43 | - | < 0.01 | 1.67E-08 | 3.96E-06 |
| ribosomal large subunit biogenesis (GO:0042273)                                      | 104 | 0  | 8.38  | - | < 0.01 | 5.40E-04 | 2.90E-02 |
| macromolecule methylation (GO:0043414)                                               | 167 | 0  | 13.46 | - | < 0.01 | 4.37E-06 | 4.45E-04 |

| Analysis Type: PANTHER Overrepresentation Test (Released 2017-12-05)          |                 |             |          |            |                 |             |          |
|-------------------------------------------------------------------------------|-----------------|-------------|----------|------------|-----------------|-------------|----------|
| Annotation Version and Release Date: GO Ontology database Released 2018-05-21 |                 |             |          |            |                 |             |          |
| Analyzed List: Triploid_outliers (Arabidopsis thaliana)                       |                 |             |          |            |                 |             |          |
| Reference List: Arabidopsis thaliana (all genes in database)                  |                 |             |          |            |                 |             |          |
| Test Type: FISHER                                                             |                 |             |          |            |                 |             |          |
| GO biological process complete                                                | REFLIST (27502) | Input(1663) | expected | over/under | fold Enrichment | raw P-value | FDR      |
| vernalization response (GO:0010048)                                           | 36              | 10          | 2.18     | +          | 4.59            | 2.18E-04    | 1.82E-02 |
| hydrogen peroxide catabolic process (GO:0042744)                              | 95              | 16          | 5.74     | +          | 2.79            | 5.57E-04    | 3.62E-02 |
| response to chitin (GO:0010200)                                               | 137             | 21          | 8.28     | +          | 2.53            | 3.55E-04    | 2.69E-02 |
| positive regulation of transcription by RNA polymerase II (GO:0045944)        | 203             | 29          | 12.28    | +          | 2.36            | 7.99E-05    | 8.29E-03 |
| drug catabolic process (GO:0042737)                                           | 253             | 33          | 15.3     | +          | 2.16            | 1.49E-04    | 1.31E-02 |
| regulation of transcription by RNA polymerase II (GO:0006357)                 | 501             | 57          | 30.29    | +          | 1.88            | 2.71E-05    | 3.64E-03 |
| nucleic acid-templated transcription (GO:0097659)                             | 1888            | 153         | 114.16   | +          | 1.34            | 5.16E-04    | 3.59E-02 |
| transcription, DNA-templated (GO:0006351)                                     | 1888            | 153         | 114.16   | +          | 1.34            | 5.16E-04    | 3.55E-02 |
| RNA biosynthetic process (GO:0032774)                                         | 1893            | 153         | 114.47   | +          | 1.34            | 5.27E-04    | 3.58E-02 |
| regulation of transcription, DNA-templated (GO:0006355)                       | 2491            | 194         | 150.63   | +          | 1.29            | 5.49E-04    | 3.69E-02 |
| regulation of RNA biosynthetic process (GO:2001141)                           | 2493            | 194         | 150.75   | +          | 1.29            | 5.53E-04    | 3.67E-02 |
| regulation of nucleic acid-templated transcription (GO:1903506)               | 2493            | 194         | 150.75   | +          | 1.29            | 5.53E-04    | 3.63E-02 |
| metabolic process (GO:0008152)                                                | 11121           | 569         | 672.47   | -          | 0.85            | 4.30E-07    | 1.16E-04 |
| organic substance metabolic process (GO:0071704)                              | 9935            | 498         | 600.75   | -          | 0.83            | 2.71E-07    | 8.42E-05 |
| primary metabolic process (GO:0044238)                                        | 9223            | 455         | 557.7    | -          | 0.82            | 1.43E-07    | 6.04E-05 |
| macromolecule metabolic process (GO:0043170)                                  | 7271            | 358         | 439.67   | -          | 0.81            | 7.25E-06    | 1.43E-03 |
| cellular process (GO:0009987)                                                 | 12555           | 617         | 759.18   | -          | 0.81            | 8.02E-12    | 1.58E-08 |
| organic cyclic compound metabolic process (GO:1901360)                        | 4493            | 220         | 271.68   | -          | 0.81            | 6.79E-04    | 4.14E-02 |
| cellular metabolic process (GO:0044237)                                       | 9524            | 466         | 575.9    | -          | 0.81            | 2.56E-08    | 2.16E-05 |
| heterocycle metabolic process (GO:0046483)                                    | 4196            | 202         | 253.73   | -          | 0.8             | 4.72E-04    | 3.32E-02 |

|                                                               |      |     |        |   |      |          |          |
|---------------------------------------------------------------|------|-----|--------|---|------|----------|----------|
| nucleobase-containing compound metabolic process (GO:0006139) | 3878 | 183 | 234.5  | - | 0.78 | 3.02E-04 | 2.38E-02 |
| nitrogen compound metabolic process (GO:0006807)              | 8015 | 367 | 484.65 | - | 0.76 | 2.64E-10 | 3.91E-07 |
| cellular nitrogen compound metabolic process (GO:0034641)     | 4767 | 216 | 288.25 | - | 0.75 | 3.00E-06 | 6.57E-04 |
| protein modification process (GO:0036211)                     | 2360 | 103 | 142.71 | - | 0.72 | 4.64E-04 | 3.35E-02 |
| cellular protein modification process (GO:0006464)            | 2360 | 103 | 142.71 | - | 0.72 | 4.64E-04 | 3.31E-02 |
| organonitrogen compound metabolic process (GO:1901564)        | 4900 | 204 | 296.29 | - | 0.69 | 2.02E-09 | 1.99E-06 |
| transport (GO:0006810)                                        | 2455 | 101 | 148.45 | - | 0.68 | 3.82E-05 | 4.91E-03 |
| protein metabolic process (GO:0019538)                        | 3702 | 152 | 223.85 | - | 0.68 | 1.66E-07 | 6.14E-05 |
| establishment of localization (GO:0051234)                    | 2500 | 101 | 151.17 | - | 0.67 | 1.35E-05 | 2.34E-03 |
| cellular protein metabolic process (GO:0044267)               | 3337 | 133 | 201.78 | - | 0.66 | 1.30E-07 | 5.92E-05 |
| localization (GO:0051179)                                     | 2633 | 102 | 159.21 | - | 0.64 | 1.14E-06 | 2.80E-04 |
| cellular component organization (GO:0016043)                  | 2799 | 108 | 169.25 | - | 0.64 | 3.18E-07 | 9.41E-05 |
| macromolecule modification (GO:0043412)                       | 2842 | 109 | 171.85 | - | 0.63 | 1.93E-07 | 6.70E-05 |
| phosphorus metabolic process (GO:0006793)                     | 1917 | 73  | 115.92 | - | 0.63 | 2.44E-05 | 3.44E-03 |
| small molecule metabolic process (GO:0044281)                 | 1751 | 66  | 105.88 | - | 0.62 | 4.35E-05 | 5.24E-03 |
| phosphate-containing compound metabolic process (GO:0006796)  | 1844 | 69  | 111.5  | - | 0.62 | 1.75E-05 | 2.72E-03 |
| cellular component organization or biogenesis (GO:0071840)    | 3161 | 112 | 191.14 | - | 0.59 | 2.83E-10 | 3.35E-07 |
| macromolecule localization (GO:0033036)                       | 1134 | 38  | 68.57  | - | 0.55 | 8.36E-05 | 8.52E-03 |
| cellular response to stress (GO:0033554)                      | 967  | 31  | 58.47  | - | 0.53 | 1.27E-04 | 1.15E-02 |
| cellular component biogenesis (GO:0044085)                    | 1309 | 41  | 79.15  | - | 0.52 | 4.38E-06 | 9.24E-04 |
| carboxylic acid metabolic process (GO:0019752)                | 999  | 30  | 60.41  | - | 0.5  | 2.70E-05 | 3.71E-03 |
| organonitrogen compound biosynthetic process (GO:1901566)     | 1571 | 46  | 95     | - | 0.48 | 3.86E-08 | 2.86E-05 |
| intracellular transport (GO:0046907)                          | 699  | 20  | 42.27  | - | 0.47 | 3.09E-04 | 2.40E-02 |
| cellular localization (GO:0051641)                            | 918  | 26  | 55.51  | - | 0.47 | 2.25E-05 | 3.24E-03 |
| cellular amide metabolic process (GO:0043603)                 | 820  | 23  | 49.58  | - | 0.46 | 4.36E-05 | 5.15E-03 |
| amide biosynthetic process (GO:0043604)                       | 687  | 19  | 41.54  | - | 0.46 | 1.97E-04 | 1.66E-02 |

|                                                                     |      |    |       |   |      |          |          |
|---------------------------------------------------------------------|------|----|-------|---|------|----------|----------|
| organic acid biosynthetic process (GO:0016053)                      | 580  | 16 | 35.07 | - | 0.46 | 6.42E-04 | 4.04E-02 |
| carboxylic acid biosynthetic process (GO:0046394)                   | 580  | 16 | 35.07 | - | 0.46 | 6.42E-04 | 3.99E-02 |
| nitrogen compound transport (GO:0071705)                            | 1052 | 29 | 63.61 | - | 0.46 | 2.46E-06 | 5.60E-04 |
| peptide metabolic process (GO:0006518)                              | 726  | 20 | 43.9  | - | 0.46 | 1.11E-04 | 1.06E-02 |
| translation (GO:0006412)                                            | 620  | 17 | 37.49 | - | 0.45 | 3.64E-04 | 2.73E-02 |
| peptide biosynthetic process (GO:0043043)                           | 625  | 17 | 37.79 | - | 0.45 | 2.81E-04 | 2.27E-02 |
| protein-containing complex assembly (GO:0065003)                    | 554  | 15 | 33.5  | - | 0.45 | 6.76E-04 | 4.17E-02 |
| establishment of localization in cell (GO:0051649)                  | 740  | 20 | 44.75 | - | 0.45 | 6.66E-05 | 7.03E-03 |
| peptide transport (GO:0015833)                                      | 822  | 22 | 49.7  | - | 0.44 | 2.16E-05 | 3.19E-03 |
| negative regulation of cellular process (GO:0048523)                | 675  | 18 | 40.82 | - | 0.44 | 1.24E-04 | 1.14E-02 |
| small molecule biosynthetic process (GO:0044283)                    | 757  | 20 | 45.77 | - | 0.44 | 4.00E-05 | 4.93E-03 |
| protein-containing complex subunit organization (GO:0043933)        | 645  | 17 | 39    | - | 0.44 | 1.70E-04 | 1.48E-02 |
| amide transport (GO:0042886)                                        | 837  | 22 | 50.61 | - | 0.43 | 1.28E-05 | 2.30E-03 |
| intracellular protein transport (GO:0006886)                        | 560  | 14 | 33.86 | - | 0.41 | 2.48E-04 | 2.03E-02 |
| protein transport (GO:0015031)                                      | 763  | 19 | 46.14 | - | 0.41 | 1.45E-05 | 2.46E-03 |
| cellular macromolecule localization (GO:0070727)                    | 688  | 17 | 41.6  | - | 0.41 | 3.42E-05 | 4.50E-03 |
| establishment of protein localization (GO:0045184)                  | 771  | 19 | 46.62 | - | 0.41 | 1.12E-05 | 2.06E-03 |
| organophosphate metabolic process (GO:0019637)                      | 610  | 15 | 36.89 | - | 0.41 | 1.09E-04 | 1.05E-02 |
| cellular protein localization (GO:0034613)                          | 655  | 16 | 39.61 | - | 0.4  | 4.61E-05 | 5.24E-03 |
| nucleobase-containing small molecule metabolic process (GO:0055086) | 462  | 11 | 27.94 | - | 0.39 | 6.08E-04 | 3.87E-02 |
| protein localization (GO:0008104)                                   | 847  | 20 | 51.22 | - | 0.39 | 1.58E-06 | 3.74E-04 |
| cell cycle (GO:0007049)                                             | 568  | 13 | 34.35 | - | 0.38 | 6.31E-05 | 6.78E-03 |
| organophosphate biosynthetic process (GO:0090407)                   | 402  | 9  | 24.31 | - | 0.37 | 8.17E-04 | 4.93E-02 |
| cellular protein-containing complex assembly (GO:0034622)           | 508  | 11 | 30.72 | - | 0.36 | 1.13E-04 | 1.06E-02 |
| cellular amino acid metabolic process (GO:0006520)                  | 427  | 9  | 25.82 | - | 0.35 | 3.50E-04 | 2.69E-02 |
| organelle organization (GO:0006996)                                 | 1645 | 30 | 99.47 | - | 0.3  | 6.22E-16 | 3.68E-12 |
| chromosome organization (GO:0051276)                                | 544  | 8  | 32.89 | - | 0.24 | 6.32E-07 | 1.62E-04 |

|                                                                                |     |   |       |   |        |          |          |
|--------------------------------------------------------------------------------|-----|---|-------|---|--------|----------|----------|
| chromatin organization (GO:0006325)                                            | 361 | 5 | 21.83 | - | 0.23   | 5.43E-05 | 6.05E-03 |
| mRNA metabolic process (GO:0016071)                                            | 523 | 7 | 31.62 | - | 0.22   | 3.75E-07 | 1.06E-04 |
| DNA repair (GO:0006281)                                                        | 322 | 4 | 19.47 | - | 0.21   | 5.95E-05 | 6.51E-03 |
| plastid organization (GO:0009657)                                              | 253 | 3 | 15.3  | - | 0.2    | 3.65E-04 | 2.70E-02 |
| cellular response to DNA damage stimulus (GO:0006974)                          | 351 | 4 | 21.22 | - | 0.19   | 1.52E-05 | 2.50E-03 |
| ribonucleoprotein complex biogenesis (GO:0022613)                              | 532 | 6 | 32.17 | - | 0.19   | 5.37E-08 | 3.18E-05 |
| DNA metabolic process (GO:0006259)                                             | 537 | 6 | 32.47 | - | 0.18   | 5.67E-08 | 3.05E-05 |
| RNA processing (GO:0006396)                                                    | 819 | 9 | 49.52 | - | 0.18   | 5.48E-12 | 1.62E-08 |
| regulation of organelle organization (GO:0033043)                              | 278 | 3 | 16.81 | - | 0.18   | 1.34E-04 | 1.20E-02 |
| proteasome-mediated ubiquitin-dependent protein catabolic process (GO:0043161) | 284 | 3 | 17.17 | - | 0.17   | 9.32E-05 | 9.35E-03 |
| proteasomal protein catabolic process (GO:0010498)                             | 296 | 3 | 17.9  | - | 0.17   | 4.57E-05 | 5.30E-03 |
| microtubule-based process (GO:0007017)                                         | 216 | 2 | 13.06 | - | 0.15   | 5.79E-04 | 3.72E-02 |
| ribosome biogenesis (GO:0042254)                                               | 440 | 4 | 26.61 | - | 0.15   | 2.41E-07 | 7.92E-05 |
| RNA modification (GO:0009451)                                                  | 441 | 4 | 26.67 | - | 0.15   | 1.60E-07 | 6.29E-05 |
| ncRNA processing (GO:0034470)                                                  | 343 | 3 | 20.74 | - | 0.14   | 5.85E-06 | 1.19E-03 |
| coenzyme biosynthetic process (GO:0009108)                                     | 230 | 2 | 13.91 | - | 0.14   | 2.84E-04 | 2.27E-02 |
| cytoskeleton organization (GO:0007010)                                         | 247 | 2 | 14.94 | - | 0.13   | 9.34E-05 | 9.21E-03 |
| ncRNA metabolic process (GO:0034660)                                           | 421 | 3 | 25.46 | - | 0.12   | 7.17E-08 | 3.53E-05 |
| RNA splicing (GO:0008380)                                                      | 285 | 2 | 17.23 | - | 0.12   | 1.56E-05 | 2.50E-03 |
| cofactor biosynthetic process (GO:0051188)                                     | 292 | 2 | 17.66 | - | 0.11   | 1.09E-05 | 2.07E-03 |
| mRNA processing (GO:0006397)                                                   | 393 | 2 | 23.76 | - | 0.08   | 4.07E-08 | 2.67E-05 |
| rRNA processing (GO:0006364)                                                   | 228 | 1 | 13.79 | - | 0.07   | 3.98E-05 | 5.00E-03 |
| rRNA metabolic process (GO:0016072)                                            | 241 | 1 | 14.57 | - | 0.07   | 1.85E-05 | 2.81E-03 |
| microtubule cytoskeleton organization (GO:0000226)                             | 141 | 0 | 8.53  | - | < 0.01 | 4.00E-04 | 2.92E-02 |
| regulation of cell cycle process (GO:0010564)                                  | 154 | 0 | 9.31  | - | < 0.01 | 1.81E-04 | 1.55E-02 |

| Analysis Type: PANTHER Overrepresentation Test (Released 2017-12-05)          |                 |             |          |            |                 |             |          |
|-------------------------------------------------------------------------------|-----------------|-------------|----------|------------|-----------------|-------------|----------|
| Annotation Version and Release Date: GO Ontology database Released 2018-05-21 |                 |             |          |            |                 |             |          |
| Analyzed List: Tetraploid outliers (Arabidopsis thaliana)                     |                 |             |          |            |                 |             |          |
| Reference List: Arabidopsis thaliana (all genes in database)                  |                 |             |          |            |                 |             |          |
| Test Type: FISHER                                                             |                 |             |          |            |                 |             |          |
| GO biological process complete                                                | REFLIST (27502) | Input(1451) | expected | over/under | fold Enrichment | raw P-value | FDR      |
| regulation of pollen tube growth (GO:0080092)                                 | 33              | 9           | 1.74     | +          | 5.17            | 1.93E-04    | 1.97E-02 |
| regulation of cell development (GO:0060284)                                   | 37              | 9           | 1.95     | +          | 4.61            | 3.99E-04    | 3.37E-02 |
| regulation of cell morphogenesis involved in differentiation (GO:0010769)     | 37              | 9           | 1.95     | +          | 4.61            | 3.99E-04    | 3.32E-02 |
| flavonoid biosynthetic process (GO:0009813)                                   | 66              | 13          | 3.48     | +          | 3.73            | 1.43E-04    | 1.66E-02 |
| flavonoid metabolic process (GO:0009812)                                      | 76              | 14          | 4.01     | +          | 3.49            | 1.50E-04    | 1.71E-02 |
| pectin catabolic process (GO:0045490)                                         | 97              | 15          | 5.12     | +          | 2.93            | 4.76E-04    | 3.91E-02 |
| polysaccharide catabolic process (GO:0000272)                                 | 185             | 23          | 9.76     | +          | 2.36            | 3.51E-04    | 3.14E-02 |
| drug catabolic process (GO:0042737)                                           | 253             | 30          | 13.35    | +          | 2.25            | 1.54E-04    | 1.72E-02 |
| secondary metabolite biosynthetic process (GO:0044550)                        | 337             | 37          | 17.78    | +          | 2.08            | 1.02E-04    | 1.33E-02 |
| secondary metabolic process (GO:0019748)                                      | 521             | 54          | 27.49    | +          | 1.96            | 1.07E-05    | 2.05E-03 |
| regulation of reproductive process (GO:2000241)                               | 358             | 37          | 18.89    | +          | 1.96            | 2.69E-04    | 2.53E-02 |
| regulation of transcription by RNA polymerase II (GO:0006357)                 | 501             | 48          | 26.43    | +          | 1.82            | 2.21E-04    | 2.14E-02 |
| metabolic process (GO:0008152)                                                | 11121           | 521         | 586.74   | -          | 0.89            | 5.93E-04    | 4.55E-02 |
| organic substance metabolic process (GO:0071704)                              | 9935            | 453         | 524.17   | -          | 0.86            | 1.33E-04    | 1.57E-02 |
| response to stimulus (GO:0050896)                                             | 6446            | 284         | 340.09   | -          | 0.84            | 6.39E-04    | 4.84E-02 |
| primary metabolic process (GO:0044238)                                        | 9223            | 403         | 486.6    | -          | 0.83            | 4.67E-06    | 1.20E-03 |
| cellular macromolecule metabolic process (GO:0044260)                         | 5910            | 255         | 311.81   | -          | 0.82            | 3.32E-04    | 3.02E-02 |
| cellular process (GO:0009987)                                                 | 12555           | 539         | 662.4    | -          | 0.81            | 1.87E-10    | 5.53E-07 |
| cellular metabolic process (GO:0044237)                                       | 9524            | 407         | 502.48   | -          | 0.81            | 2.00E-07    | 1.48E-04 |
| macromolecule metabolic process (GO:0043170)                                  | 7271            | 304         | 383.62   | -          | 0.79            | 2.32E-06    | 6.85E-04 |
| cellular aromatic compound metabolic process (GO:0006725)                     | 4370            | 182         | 230.56   | -          | 0.79            | 5.01E-04    | 4.06E-02 |
| organic cyclic compound metabolic process (GO:1901360)                        | 4493            | 183         | 237.05   | -          | 0.77            | 1.20E-04    | 1.48E-02 |
| organonitrogen compound metabolic process (GO:1901564)                        | 4900            | 197         | 258.52   | -          | 0.76            | 2.50E-05    | 4.11E-03 |
| protein metabolic process (GO:0019538)                                        | 3702            | 147         | 195.32   | -          | 0.75            | 1.89E-04    | 1.96E-02 |
| nitrogen compound metabolic process (GO:0006807)                              | 8015            | 318         | 422.87   | -          | 0.75            | 1.43E-09    | 2.82E-06 |
| heterocycle metabolic process (GO:0046483)                                    | 4196            | 163         | 221.38   | -          | 0.74            | 1.71E-05    | 3.07E-03 |
| nucleic acid metabolic process (GO:0090304)                                   | 3438            | 133         | 181.39   | -          | 0.73            | 1.15E-04    | 1.48E-02 |
| cellular protein metabolic process (GO:0044267)                               | 3337            | 126         | 176.06   | -          | 0.72            | 4.63E-05    | 7.20E-03 |



|                                                                     |      |     |        |   |      |          |          |
|---------------------------------------------------------------------|------|-----|--------|---|------|----------|----------|
| cellular nitrogen compound metabolic process (GO:0034641)           | 4767 | 175 | 251.51 | - | 0.7  | 7.35E-08 | 6.20E-05 |
| nucleobase-containing compound metabolic process (GO:0006139)       | 3878 | 142 | 204.6  | - | 0.69 | 1.58E-06 | 5.50E-04 |
| macromolecule modification (GO:0043412)                             | 2842 | 99  | 149.94 | - | 0.66 | 7.79E-06 | 1.71E-03 |
| cellular component organization (GO:0016043)                        | 2799 | 94  | 147.67 | - | 0.64 | 1.79E-06 | 5.88E-04 |
| organonitrogen compound biosynthetic process (GO:1901566)           | 1571 | 50  | 82.89  | - | 0.6  | 1.33E-04 | 1.60E-02 |
| cellular component organization or biogenesis (GO:0071840)          | 3161 | 99  | 166.77 | - | 0.59 | 7.64E-09 | 1.13E-05 |
| cellular localization (GO:0051641)                                  | 918  | 24  | 48.43  | - | 0.5  | 1.83E-04 | 1.97E-02 |
| cellular response to stress (GO:0033554)                            | 967  | 24  | 51.02  | - | 0.47 | 4.20E-05 | 6.71E-03 |
| cellular component assembly (GO:0022607)                            | 788  | 19  | 41.57  | - | 0.46 | 1.55E-04 | 1.70E-02 |
| nitrogen compound transport (GO:0071705)                            | 1052 | 25  | 55.5   | - | 0.45 | 8.81E-06 | 1.74E-03 |
| negative regulation of cellular process (GO:0048523)                | 675  | 16  | 35.61  | - | 0.45 | 3.93E-04 | 3.42E-02 |
| cellular component biogenesis (GO:0044085)                          | 1309 | 30  | 69.06  | - | 0.43 | 2.33E-07 | 1.53E-04 |
| establishment of localization in cell (GO:0051649)                  | 740  | 16  | 39.04  | - | 0.41 | 6.28E-05 | 9.52E-03 |
| intracellular transport (GO:0046907)                                | 699  | 15  | 36.88  | - | 0.41 | 8.36E-05 | 1.21E-02 |
| negative regulation of metabolic process (GO:0009892)               | 637  | 13  | 33.61  | - | 0.39 | 1.16E-04 | 1.46E-02 |
| negative regulation of macromolecule metabolic process (GO:0010605) | 592  | 12  | 31.23  | - | 0.38 | 2.07E-04 | 2.04E-02 |
| peptide transport (GO:0015833)                                      | 822  | 16  | 43.37  | - | 0.37 | 3.86E-06 | 1.04E-03 |
| amide transport (GO:0042886)                                        | 837  | 16  | 44.16  | - | 0.36 | 2.17E-06 | 6.76E-04 |
| protein-containing complex assembly (GO:0065003)                    | 554  | 10  | 29.23  | - | 0.34 | 8.44E-05 | 1.19E-02 |
| protein localization (GO:0008104)                                   | 847  | 15  | 44.69  | - | 0.34 | 6.75E-07 | 3.33E-04 |
| organelle organization (GO:0006996)                                 | 1645 | 29  | 86.79  | - | 0.33 | 1.05E-12 | 6.23E-09 |
| cellular macromolecule localization (GO:0070727)                    | 688  | 12  | 36.3   | - | 0.33 | 6.33E-06 | 1.44E-03 |
| mRNA metabolic process (GO:0016071)                                 | 523  | 9   | 27.59  | - | 0.33 | 8.12E-05 | 1.20E-02 |
| protein-containing complex subunit organization (GO:0043933)        | 645  | 11  | 34.03  | - | 0.32 | 1.11E-05 | 2.06E-03 |
| protein transport (GO:0015031)                                      | 763  | 13  | 40.26  | - | 0.32 | 1.52E-06 | 5.61E-04 |
| establishment of protein localization (GO:0045184)                  | 771  | 13  | 40.68  | - | 0.32 | 1.12E-06 | 4.73E-04 |
| cellular protein localization (GO:0034613)                          | 655  | 11  | 34.56  | - | 0.32 | 8.38E-06 | 1.77E-03 |
| intracellular protein transport (GO:0006886)                        | 560  | 9   | 29.55  | - | 0.3  | 2.44E-05 | 4.12E-03 |
| negative regulation of cellular metabolic process (GO:0031324)      | 436  | 7   | 23     | - | 0.3  | 2.48E-04 | 2.36E-02 |
| cell cycle (GO:0007049)                                             | 568  | 9   | 29.97  | - | 0.3  | 1.79E-05 | 3.12E-03 |
| RNA processing (GO:0006396)                                         | 819  | 12  | 43.21  | - | 0.28 | 4.58E-08 | 4.51E-05 |
| cellular response to DNA damage stimulus (GO:0006974)               | 351  | 5   | 18.52  | - | 0.27 | 5.30E-04 | 4.23E-02 |
| cell cycle process (GO:0022402)                                     | 374  | 5   | 19.73  | - | 0.25 | 2.01E-04 | 2.01E-02 |
| cellular protein-containing complex assembly (GO:0034622)           | 508  | 6   | 26.8   | - | 0.22 | 3.34E-06 | 9.40E-04 |
| DNA metabolic process (GO:0006259)                                  | 537  | 6   | 28.33  | - | 0.21 | 1.26E-06 | 4.95E-04 |

|                                                                                |     |   |       |   |        |          |          |
|--------------------------------------------------------------------------------|-----|---|-------|---|--------|----------|----------|
| RNA splicing (GO:0008380)                                                      | 285 | 3 | 15.04 | - | 0.2    | 5.52E-04 | 4.36E-02 |
| ncRNA metabolic process (GO:0034660)                                           | 421 | 4 | 22.21 | - | 0.18   | 8.45E-06 | 1.72E-03 |
| DNA repair (GO:0006281)                                                        | 322 | 3 | 16.99 | - | 0.18   | 9.66E-05 | 1.30E-02 |
| ribosome biogenesis (GO:0042254)                                               | 440 | 3 | 23.21 | - | 0.13   | 4.73E-07 | 2.80E-04 |
| RNA modification (GO:0009451)                                                  | 441 | 3 | 23.27 | - | 0.13   | 4.75E-07 | 2.56E-04 |
| ncRNA processing (GO:0034470)                                                  | 343 | 2 | 18.1  | - | 0.11   | 5.38E-06 | 1.32E-03 |
| ribonucleoprotein complex biogenesis (GO:0022613)                              | 532 | 3 | 28.07 | - | 0.11   | 9.18E-09 | 1.09E-05 |
| organelle fission (GO:0048285)                                                 | 201 | 1 | 10.6  | - | 0.09   | 5.64E-04 | 4.39E-02 |
| membrane organization (GO:0061024)                                             | 210 | 1 | 11.08 | - | 0.09   | 3.89E-04 | 3.43E-02 |
| ribonucleoprotein complex assembly (GO:0022618)                                | 212 | 1 | 11.19 | - | 0.09   | 3.93E-04 | 3.37E-02 |
| ribonucleoprotein complex subunit organization (GO:0071826)                    | 221 | 1 | 11.66 | - | 0.09   | 2.74E-04 | 2.53E-02 |
| rRNA processing (GO:0006364)                                                   | 228 | 1 | 12.03 | - | 0.08   | 1.87E-04 | 1.98E-02 |
| rRNA metabolic process (GO:0016072)                                            | 241 | 1 | 12.72 | - | 0.08   | 8.72E-05 | 1.20E-02 |
| proteasomal protein catabolic process (GO:0010498)                             | 296 | 1 | 15.62 | - | 0.06   | 6.24E-06 | 1.48E-03 |
| proteasome-mediated ubiquitin-dependent protein catabolic process (GO:0043161) | 284 | 0 | 14.98 | - | < 0.01 | 7.51E-07 | 3.42E-04 |

|                                                                                                                                  |
|----------------------------------------------------------------------------------------------------------------------------------|
| GO terms that are underrepresented significantly (fdr<0.05) in all groups (outliers from all trisomies, triploid and tetraploid) |
| RNA splicing (GO:0008380)                                                                                                        |
| RNA modification (GO:0009451)                                                                                                    |
| ncRNA processing (GO:0034470)                                                                                                    |
| ncRNA metabolic process (GO:0034660)                                                                                             |
| proteasomal protein catabolic process (GO:0010498)                                                                               |
| rRNA processing (GO:0006364)                                                                                                     |
| rRNA metabolic process (GO:0016072)                                                                                              |
| ribonucleoprotein complex biogenesis (GO:0022613)                                                                                |
| ribosome biogenesis (GO:0042254)                                                                                                 |
| cellular protein-containing complex assembly (GO:0034622)                                                                        |
| RNA processing (GO:0006396)                                                                                                      |
| intracellular protein transport (GO:0006886)                                                                                     |
| cellular protein localization (GO:0034613)                                                                                       |
| establishment of protein localization (GO:0045184)                                                                               |
| protein transport (GO:0015031)                                                                                                   |
| protein-containing complex subunit organization (GO:0043933)                                                                     |
| mRNA metabolic process (GO:0016071)                                                                                              |
| cellular macromolecule localization (GO:0070727)                                                                                 |
| organelle organization (GO:0006996)                                                                                              |
| protein localization (GO:0008104)                                                                                                |
| protein-containing complex assembly (GO:0065003)                                                                                 |
| amide transport (GO:0042886)                                                                                                     |
| peptide transport (GO:0015833)                                                                                                   |
| intracellular transport (GO:0046907)                                                                                             |
| establishment of localization in cell (GO:0051649)                                                                               |
| cellular component biogenesis (GO:0044085)                                                                                       |
| cellular localization (GO:0051641)                                                                                               |
| cellular component organization or biogenesis (GO:0071840)                                                                       |
| organonitrogen compound biosynthetic process (GO:1901566)                                                                        |
| macromolecule modification (GO:0043412)                                                                                          |
| nucleobase-containing compound metabolic process (GO:0006139)                                                                    |
| cellular nitrogen compound metabolic process (GO:0034641)                                                                        |
| cellular protein metabolic process (GO:0044267)                                                                                  |
| nitrogen compound metabolic process (GO:0006807)                                                                                 |
| protein metabolic process (GO:0019538)                                                                                           |
| organonitrogen compound metabolic process (GO:1901564)                                                                           |
| macromolecule metabolic process (GO:0043170)                                                                                     |
| cellular metabolic process (GO:0044237)                                                                                          |
| cellular process (GO:0009987)                                                                                                    |
| primary metabolic process (GO:0044238)                                                                                           |

Table S5. Matrix of methylation status of genes in the trisomic and ploidy series. The number of genes for the types of methylation are listed on the left for the diploid control. The same order of status is listed for the experimental genotypes from left to right. The diagonal from top left to bottom right indicates those for which there is no difference between the compared genotypes. Values off of the diagonal note the number of genes in the column that differ from the diploid.

|                              | Number of genes |           |             |              |          | Percent of genes |              |              |              |              | Percent of overlap |
|------------------------------|-----------------|-----------|-------------|--------------|----------|------------------|--------------|--------------|--------------|--------------|--------------------|
| <b>Tetraploid</b><br>Diploid | gbM             | mCHG      | mCHH        | UM           | unknown  | gbM              | mCHG         | mCHH         | UM           | unknown      | 93.19%             |
| gbM                          | <b>2564</b>     | 41        | 521         | 121          | 0        | <b>84.9%</b>     | 25.6%        | 20.2%        | 0.6%         | 0.0%         |                    |
| mCHG                         | 10              | <b>49</b> | 67          | 13           | 0        | 0.3%             | <b>30.6%</b> | 2.6%         | 0.1%         | 0.0%         |                    |
| mCHH                         | 34              | 28        | <b>1540</b> | 95           | 0        | 1.1%             | 17.5%        | <b>59.8%</b> | 0.4%         | 0.0%         |                    |
| UM                           | 413             | 42        | 449         | <b>21189</b> | 13       | 13.7%            | 26.3%        | 17.4%        | <b>98.9%</b> | 76.5%        |                    |
| unknown                      | 0               | 0         | 0           | 6            | <b>4</b> | 0.0%             | 0.0%         | 0.0%         | 0.0%         | <b>23.5%</b> |                    |
| <b>Triploid</b><br>Diploid   | gbM             | mCHG      | mCHH        | UM           | unknown  | gbM              | mCHG         | mCHH         | UM           | unknown      | 96.19%             |
| gbM                          | <b>2840</b>     | 2         | 23          | 382          | 0        | <b>92.1%</b>     | 1.5%         | 1.6%         | 1.7%         | 0.0%         |                    |
| mCHG                         | 25              | <b>54</b> | 23          | 37           | 0        | 0.8%             | <b>41.5%</b> | 1.6%         | 0.2%         | 0.0%         |                    |
| mCHH                         | 94              | 51        | <b>1377</b> | 175          | 0        | 3.1%             | 39.2%        | <b>93.3%</b> | 0.8%         | 0.0%         |                    |
| UM                           | 125             | 23        | 53          | <b>21886</b> | 19       | 4.1%             | 17.7%        | 3.6%         | <b>97.3%</b> | 79.2%        |                    |
| unknown                      | 0               | 0         | 0           | 5            | <b>5</b> | 0.0%             | 0.0%         | 0.0%         | 0.0%         | <b>20.8%</b> |                    |
| <b>Trisomy 1</b><br>Diploid  | gbM             | mCHG      | mCHH        | UM           | unknown  | gbM              | mCHG         | mCHH         | UM           | unknown      | 92.49%             |
| gbM                          | <b>2396</b>     | 3         | 0           | 844          | 4        | <b>89.6%</b>     | 0.9%         | 0.0%         | 3.6%         | 4.1%         |                    |
| mCHG                         | 35              | <b>24</b> | 1           | 76           | 3        | 1.3%             | <b>7.0%</b>  | 0.1%         | 0.3%         | 3.1%         |                    |
| mCHH                         | 150             | 313       | <b>801</b>  | 433          | 0        | 5.6%             | 91.3%        | <b>99.5%</b> | 1.9%         | 0.0%         |                    |
| UM                           | 93              | 3         | 3           | <b>21925</b> | 82       | 3.5%             | 0.9%         | 0.4%         | <b>94.2%</b> | 83.7%        |                    |
| unknown                      | 0               | 0         | 0           | 1            | <b>9</b> | 0.0%             | 0.0%         | 0.0%         | 0.0%         | <b>9.2%</b>  |                    |
| <b>Trisomy 2</b><br>Diploid  | gbM             | mCHG      | mCHH        | UM           | unknown  | gbM              | mCHG         | mCHH         | UM           | unknown      | 92.61%             |
| gbM                          | <b>2331</b>     | 1         | 0           | 910          | 5        | <b>89.0%</b>     | 0.4%         | 0.0%         | 3.9%         | 4.8%         |                    |
| mCHG                         | 34              | <b>18</b> | 0           | 85           | 2        | 1.3%             | <b>8.0%</b>  | 0.0%         | 0.4%         | 1.9%         |                    |
| mCHH                         | 156             | 202       | <b>919</b>  | 416          | 4        | 6.0%             | 89.8%        | <b>99.4%</b> | 1.8%         | 3.8%         |                    |
| UM                           | 98              | 4         | 6           | <b>21913</b> | 85       | 3.7%             | 1.8%         | 0.7%         | <b>94.0%</b> | 81.0%        |                    |
| unknown                      | 0               | 0         | 0           | 1            | <b>9</b> | 0.0%             | 0.0%         | 0.0%         | 0.0%         | <b>8.6%</b>  |                    |
| <b>Trisomy 3</b><br>Diploid  | gbM             | mCHG      | mCHH        | UM           | unknown  | gbM              | mCHG         | mCHH         | UM           | unknown      | 92.84%             |
| gbM                          | <b>2349</b>     | 1         | 0           | 895          | 2        | <b>90.7%</b>     | 0.4%         | 0.0%         | 3.8%         | 2.2%         |                    |
| mCHG                         | 33              | <b>27</b> | 2           | 75           | 2        | 1.3%             | <b>10.6%</b> | 0.2%         | 0.3%         | 2.2%         |                    |
| mCHH                         | 135             | 220       | <b>925</b>  | 417          | 0        | 5.2%             | 86.6%        | <b>99.3%</b> | 1.8%         | 0.0%         |                    |
| UM                           | 73              | 6         | 5           | <b>21943</b> | 79       | 2.8%             | 2.4%         | 0.5%         | <b>94.1%</b> | 86.8%        |                    |
| unknown                      | 0               | 0         | 0           | 2            | <b>8</b> | 0.0%             | 0.0%         | 0.0%         | 0.0%         | <b>8.8%</b>  |                    |
| <b>Trisomy 4</b><br>Diploid  | gbM             | mCHG      | mCHH        | UM           | unknown  | gbM              | mCHG         | mCHH         | UM           | unknown      | 82.41%             |
| gbM                          | <b>1774</b>     | 45        | 1334        | 94           | 0        | <b>83.8%</b>     | 32.6%        | 23.0%        | 0.5%         | 0.0%         |                    |
| mCHG                         | 4               | <b>26</b> | 102         | 7            | 0        | 0.2%             | <b>18.8%</b> | 1.8%         | 0.0%         | 0.0%         |                    |

|                      |             |           |             |              |           |              |              |              |              |              |        |
|----------------------|-------------|-----------|-------------|--------------|-----------|--------------|--------------|--------------|--------------|--------------|--------|
| mCHH                 | 5           | 9         | <b>1628</b> | 55           | 0         | 0.2%         | 6.5%         | <b>28.1%</b> | 0.3%         | 0.0%         |        |
| UM                   | 333         | 58        | 2725        | <b>18984</b> | 6         | 15.7%        | 42.0%        | 47.1%        | <b>99.1%</b> | 75.0%        |        |
| unknown              | 0           | 0         | 0           | 8            | <b>2</b>  | 0.0%         | 0.0%         | 0.0%         | 0.0%         | <b>25.0%</b> |        |
| Trisomy 5<br>Diploid | gbM         | mCHG      | mCHH        | UM           | unknown   | gbM          | mCHG         | mCHH         | UM           | unknown      | 92.14% |
| gbM                  | <b>2255</b> | 5         | 0           | 981          | 6         | <b>90.1%</b> | 1.5%         | 0.0%         | 4.2%         | 5.1%         |        |
| mCHG                 | 28          | <b>35</b> | 3           | 66           | 7         | 1.1%         | <b>10.1%</b> | 0.4%         | 0.3%         | 6.0%         |        |
| mCHH                 | 140         | 297       | <b>845</b>  | 412          | 3         | 5.6%         | 86.1%        | <b>98.1%</b> | 1.8%         | 2.6%         |        |
| UM                   | 79          | 8         | 13          | <b>21915</b> | 91        | 3.2%         | 2.3%         | 1.5%         | <b>93.8%</b> | 77.8%        |        |
| unknown              | 0           | 0         | 0           | 0            | <b>10</b> | 0.0%         | 0.0%         | 0.0%         | 0.0%         | <b>8.6%</b>  |        |

Table S6. Comparison of regulatory network interactions between transcription factors and their targets in the trisomics and ploidy series compared to the AtRegNet reference interactions. Using only significant genes, the relationship of a TF and its targets in the trisomic or ploidy data was compared to the relationship in the regulatory network reference data. If the relationship is similar, it is noted as “Similarity” but if the relationship differs between the two data sets, it is listed as “Dissimilarity”.

|            | Data       | Reference  | No. of interactions | %      | % similarity vs dissimilarity |
|------------|------------|------------|---------------------|--------|-------------------------------|
| Trisomy 1  | Activation | Activation | 304                 | 44.64% | Similarity: 57.56%            |
|            | Repression | Repression | 88                  | 12.92% |                               |
|            | Activation | Repression | 117                 | 17.18% | Dissimilarity: 42.44%         |
|            | Repression | Activation | 172                 | 25.26% |                               |
| Trisomy 2  | Activation | Activation | 160                 | 44.69% | Similarity: 56.70%            |
|            | Repression | Repression | 43                  | 12.01% |                               |
|            | Activation | Repression | 95                  | 26.54% | Dissimilarity: 43.30%         |
|            | Repression | Activation | 60                  | 16.76% |                               |
| Trisomy 3  | Activation | Activation | 92                  | 42.59% | Similarity: 52.78%            |
|            | Repression | Repression | 22                  | 10.19% |                               |
|            | Activation | Repression | 35                  | 16.20% | Dissimilarity: 47.22%         |
|            | Repression | Activation | 67                  | 31.02% |                               |
| Trisomy 4  | Activation | Activation | 57                  | 20.28% | Similarity: 41.28%            |
|            | Repression | Repression | 59                  | 21.00% |                               |
|            | Activation | Repression | 46                  | 16.37% | Dissimilarity: 58.72%         |
|            | Repression | Activation | 119                 | 42.35% |                               |
| Trisomy 5  | Activation | Activation | 23                  | 33.82% | Similarity: 38.24%            |
|            | Repression | Repression | 3                   | 4.41%  |                               |
|            | Activation | Repression | 20                  | 29.41% | Dissimilarity: 61.76%         |
|            | Repression | Activation | 22                  | 32.35% |                               |
| Triploid   | Activation | Activation | 5                   | 71.43% | Similarity: 100%              |
|            | Repression | Repression | 2                   | 28.57% |                               |
|            | Activation | Repression | 0                   | 0.00%  | Dissimilarity: 0.00%          |
|            | Repression | Activation | 0                   | 0.00%  |                               |
| Tetraploid | Activation | Activation | 5                   | 35.71% | Similarity: 57.14%            |
|            | Repression | Repression | 3                   | 21.43% |                               |
|            | Activation | Repression | 2                   | 14.29% | Dissimilarity: 42.86%         |
|            | Repression | Activation | 4                   | 28.57% |                               |



Table S7. qRT-PCR primer list. Primers used in the qPCR validation experiments are listed by gene with a listing of sequences and the genotype for which it corresponds.

| Name         | Sequence (5' to 3')    | Usage                     |
|--------------|------------------------|---------------------------|
| AT1G25440_F  | GAACGAGACATGGACATCAG   | qRT-PCR: Trisomy 1        |
| AT1G25440_R  | AAACTCTAGCTTCTCTACCT   | qRT-PCR: Trisomy 1        |
| AT1G64510_F  | GAGACCAGACATGTCTGAAG   | qRT-PCR: Trisomy 1        |
| AT1G64510_R  | CCAACGGAATCACTCCTCTG   | qRT-PCR: Trisomy 1        |
| AT2G42220_F  | GGTGGTGGATGTAAGAGACAAG | qRT-PCR: Trisomy 1        |
| AT2G42220_R  | AGCCCTGAGAAATTGTTGTG   | qRT-PCR: Trisomy 1        |
| AT5G25980_F  | CCTTTCGTTACACTCTTTCA   | qRT-PCR: Trisomy 1        |
| AT5G25980_R  | ACTCTATCACCAAATCTCTC   | qRT-PCR: Trisomy 1        |
| AT4G38970_F  | TCGATACGCTGCCATTTACAC  | qRT-PCR: Trisomy 1        |
| AT4G38970_R  | TCGTATGTTCTGTCAATGTC   | qRT-PCR: Trisomy 1        |
| AT2G41250_F  | TGGTGAGATCACTCATAAGG   | qRT-PCR: Trisomy 1        |
| AT2G41250_R  | TAAGTATCTCAGCCTCCGAG   | qRT-PCR: Trisomy 1        |
| AT3G56290_F1 | AGGAGAAAAATCGGAGGAAC   | qRT-PCR: Trisomy 1        |
| AT3G56290_R1 | AGGGAGGATTTGAAGACAAG   | qRT-PCR: Trisomy 1        |
| AT2G26500_F  | GCTTCACTTCTCTTGCATCC   | qRT-PCR: Trisomy 2        |
| AT2G26500_R  | CCACCATATGAGTTAAGTCC   | qRT-PCR: Trisomy 2        |
| AT2G31570_F  | CAACAACTGTCTGCACCAG    | qRT-PCR: Trisomy 2        |
| AT2G31570_R  | TAAGACCTTGCCATCAGGAG   | qRT-PCR: Trisomy 2        |
| AT4G21280_F  | CGTTTGTTCAAGGCTGTCCTC  | qRT-PCR: Trisomy 2        |
| AT4G21280_R  | CTTGGTCTGAGTTATCTGTC   | qRT-PCR: Trisomy 2        |
| AT1G31812_F  | ACGAGGATTTGCTCATTCTC   | qRT-PCR: Trisomy 2        |
| AT1G31812_R  | TCAACAGCCTTCCAAGCATC   | qRT-PCR: Trisomy 2        |
| AT5G20290_F  | TTCAAGCAGTGGTACCTCTC   | qRT-PCR: Trisomy 2        |
| AT5G20290_R  | TGCAACAGCTGCCTCTTACAC  | qRT-PCR: Trisomy 2        |
| AT4G02380_F  | TGGCTCGTTCTATCTCTAAC   | qRT-PCR: Trisomy 2        |
| AT4G02380_R  | TTCATCACAGCCGAAGCAAC   | qRT-PCR: Trisomy 2        |
| AT1G15125_F  | GTCTTCTTCAACGACGTCTC   | qRT-PCR: Trisomy 2        |
| AT1G15125_R  | TGAGATGTGCCTTTGGA AAC  | qRT-PCR: Trisomy 2        |
| AT5G42270_R  | GTTGTCACATTCTCGTCTCC   | qRT-PCR: Trisomy 5        |
| AT5G42270_F  | GATTGTATAGCAGAAGCTAC   | qRT-PCR: Trisomy 5        |
| AT5G20700_F  | GACTCGATCGACACTCTGTG   | qRT-PCR: Trisomy 5        |
| AT5G20700_R  | CTCCAGAGAATTCGCCAGAG   | qRT-PCR: Trisomy 5        |
| AT1G15980_F  | TGCCATCTGAAATAGACCTC   | qRT-PCR: Trisomy 5        |
| AT1G15980_R  | AGCATCTCCTAGGTGTAACC   | qRT-PCR: Trisomy 5        |
| AT2G39730_F  | ACAAGATCAAGGACGAAGAC   | qRT-PCR: Trisomy 5        |
| AT2G39730_R  | CTTCCGATCTTCTCAACTC    | qRT-PCR: Trisomy 5        |
| AT1G56280_F  | ACACGATCACAGAGTTCTCC   | qRT-PCR: Trisomy 5        |
| AT1G56280_R  | TCTGATTTGTGCCTCCTCTC   | qRT-PCR: Trisomy 5        |
| AT1G80130_F  | CAGGAAACTCGCTTTTGACC   | qRT-PCR: Trisomy 5        |
| AT1G80130_R  | AGAGATAGAACGTTTCCATC   | qRT-PCR: Trisomy 5        |
| ERCC00042_F1 | GCAGCAGTTCCAATATAGACA  | qRT-PCR: internal control |
| ERCC00042_R1 | AAAGATTGAGAGAGGAAGGT   | qRT-PCR: internal control |
| ERCC00053_F1 | CCCTGTCCATCAATACCTTC   | qRT-PCR: internal control |
| ERCC00053_R1 | TTCCAATTCCTTCCAGCA     | qRT-PCR: internal control |

Table S8. Chi square goodness-of-fit tests to examine if the number of genes with one category of methylation (e.g. gbM) in the diploid is significantly different from that in tetraploid, triploid or trisomies. Probabilities for the respective comparisons are given.

| Category | Tetraploid | Triploid    | Trisomy1 | Trisomy2 | Trisomy3 | Trisomy4  | Trisomy5 |
|----------|------------|-------------|----------|----------|----------|-----------|----------|
| UM       | 2.83E-13   | 2.49E-05    | 1.27E-41 | 5.43E-45 | 1.62E-45 | 8.94E-193 | 9.58E-49 |
| gbM      | 0.00251647 | 0.030315622 | 3.42E-15 | 4.43E-18 | 1.01E-19 | 2.15E-59  | 3.19E-25 |
| mCHH     | 1.42E-44   | 5.70E-05    | 2.61E-74 | 9.74E-54 | 1.14E-52 | 0         | 3.67E-64 |
| mCHG     | 0.24612139 | 0.624856482 | 1.58E-20 | 7.81E-06 | 7.86E-09 | 1         | 7.98E-21 |

Table S9. Gene list noting the methylation status determined in the study.



|           |      |      |      |     |      |     |      |     |
|-----------|------|------|------|-----|------|-----|------|-----|
| AT1G01450 | UM   | UM   | UM   | UM  | UM   | UM  | UM   | UM  |
| AT1G01453 | UM   | UM   | UM   | UM  | UM   | UM  | UM   | UM  |
| AT1G01460 | UM   | UM   | UM   | UM  | UM   | UM  | UM   | UM  |
| AT1G01470 | UM   | UM   | UM   | UM  | UM   | UM  | UM   | UM  |
| AT1G01471 | UM   | UM   | UM   | UM  | UM   | UM  | UM   | UM  |
| AT1G01480 | UM   | UM   | UM   | UM  | UM   | UM  | UM   | UM  |
| AT1G01490 | mCHH | mCHH | UM   | UM  | UM   | UM  | mCHH | UM  |
| AT1G01500 | UM   | UM   | UM   | UM  | UM   | UM  | UM   | UM  |
| AT1G01510 | UM   | UM   | UM   | UM  | UM   | UM  | UM   | UM  |
| AT1G01520 | UM   | UM   | UM   | UM  | UM   | UM  | UM   | UM  |
| AT1G01530 | mCHH | mCHH | mCHH | gbM | mCHH | gbM | mCHH | gbM |
| AT1G01540 | UM   | UM   | UM   | UM  | UM   | UM  | UM   | UM  |
| AT1G01550 | UM   | mCHH | UM   | UM  | UM   | UM  | UM   | UM  |
| AT1G01560 | UM   | UM   | UM   | UM  | UM   | UM  | UM   | UM  |
| AT1G01570 | UM   | UM   | UM   | UM  | UM   | UM  | UM   | UM  |
| AT1G01580 | UM   | UM   | UM   | UM  | UM   | UM  | UM   | UM  |
| AT1G01590 | UM   | UM   | UM   | UM  | UM   | UM  | UM   | UM  |
| AT1G01600 | UM   | UM   | UM   | UM  | UM   | UM  | UM   | UM  |
| AT1G01610 | UM   | UM   | UM   | UM  | UM   | UM  | UM   | UM  |
| AT1G01620 | UM   | UM   | UM   | UM  | UM   | UM  | UM   | UM  |
| AT1G01630 | UM   | UM   | UM   | UM  | UM   | UM  | mCHH | UM  |
| AT1G01640 | UM   | UM   | UM   | UM  | UM   | UM  | UM   | UM  |
| AT1G01650 | UM   | gbM  | UM   | UM  | UM   | UM  | UM   | UM  |
| AT1G01660 | UM   | gbM  | UM   | UM  | UM   | UM  | mCHH | UM  |
| AT1G01670 | UM   | gbM  | gbM  | gbM | UM   | UM  | gbM  | gbM |
| AT1G01680 | UM   | UM   | UM   | UM  | UM   | UM  | UM   | UM  |
| AT1G01690 | UM   | UM   | UM   | UM  | UM   | UM  | UM   | UM  |
| AT1G01695 | UM   | UM   | UM   | UM  | UM   | UM  | mCHH | UM  |
| AT1G01700 | UM   | UM   | UM   | UM  | UM   | UM  | UM   | UM  |
| AT1G01710 | UM   | UM   | UM   | UM  | UM   | UM  | mCHH | UM  |
| AT1G01720 | UM   | UM   | UM   | UM  | UM   | UM  | UM   | UM  |
| AT1G01725 | UM   | UM   | UM   | UM  | UM   | UM  | UM   | UM  |
| AT1G01730 | UM   | UM   | UM   | UM  | UM   | UM  | UM   | UM  |
| AT1G01740 | UM   | UM   | UM   | UM  | UM   | UM  | mCHH | UM  |
| AT1G01750 | UM   | UM   | UM   | UM  | UM   | UM  | UM   | UM  |
| AT1G01760 | UM   | UM   | UM   | UM  | UM   | UM  | UM   | UM  |
| AT1G01770 | UM   | UM   | UM   | UM  | UM   | UM  | UM   | UM  |
| AT1G01780 | UM   | UM   | UM   | UM  | UM   | UM  | UM   | UM  |
| AT1G01790 | UM   | UM   | UM   | UM  | UM   | UM  | mCHH | UM  |
| AT1G01800 | UM   | UM   | UM   | UM  | UM   | UM  | UM   | UM  |
| AT1G01810 | UM   | UM   | UM   | UM  | UM   | UM  | UM   | UM  |
| AT1G01820 | UM   | UM   | UM   | UM  | UM   | UM  | UM   | UM  |
| AT1G01830 | UM   | UM   | UM   | UM  | UM   | UM  | UM   | UM  |
| AT1G01840 | UM   | UM   | UM   | UM  | UM   | UM  | UM   | UM  |
| AT1G01860 | UM   | UM   | UM   | UM  | UM   | UM  | UM   | UM  |
| AT1G01880 | UM   | UM   | UM   | UM  | UM   | UM  | UM   | UM  |
| AT1G01900 | UM   | UM   | UM   | UM  | UM   | UM  | UM   | UM  |
| AT1G01910 | UM   | UM   | UM   | UM  | UM   | UM  | UM   | UM  |

|           |      |      |     |     |     |     |      |     |
|-----------|------|------|-----|-----|-----|-----|------|-----|
| AT1G01920 | UM   | UM   | UM  | UM  | UM  | UM  | UM   | UM  |
| AT1G01930 | UM   | UM   | UM  | UM  | UM  | UM  | UM   | UM  |
| AT1G01940 | UM   | UM   | UM  | UM  | UM  | UM  | UM   | UM  |
| AT1G01950 | gbM  | gbM  | gbM | gbM | UM  | gbM | mCHH | UM  |
| AT1G01960 | gbM  | mCHH | UM  | gbM | UM  | UM  | mCHH | UM  |
| AT1G01970 | UM   | UM   | UM  | UM  | UM  | UM  | UM   | UM  |
| AT1G01980 | UM   | UM   | UM  | UM  | UM  | UM  | UM   | UM  |
| AT1G01990 | UM   | UM   | UM  | UM  | UM  | UM  | UM   | UM  |
| AT1G02000 | UM   | UM   | UM  | UM  | UM  | UM  | UM   | UM  |
| AT1G02010 | gbM  | gbM  | gbM | gbM | gbM | UM  | gbM  | gbM |
| AT1G02020 | UM   | UM   | UM  | UM  | UM  | UM  | UM   | UM  |
| AT1G02030 | UM   | UM   | UM  | UM  | UM  | UM  | UM   | UM  |
| AT1G02040 | UM   | UM   | UM  | UM  | UM  | UM  | UM   | UM  |
| AT1G02050 | gbM  | gbM  | gbM | gbM | gbM | gbM | gbM  | gbM |
| AT1G02060 | UM   | UM   | UM  | UM  | UM  | UM  | UM   | UM  |
| AT1G02065 | UM   | UM   | UM  | UM  | UM  | UM  | UM   | UM  |
| AT1G02070 | UM   | UM   | UM  | UM  | UM  | UM  | UM   | UM  |
| AT1G02074 | UM   | UM   | UM  | UM  | UM  | UM  | UM   | UM  |
| AT1G02080 | gbM  | mCHH | gbM | gbM | gbM | gbM | mCHH | gbM |
| AT1G02090 | UM   | UM   | UM  | UM  | UM  | UM  | UM   | UM  |
| AT1G02100 | UM   | UM   | UM  | UM  | UM  | UM  | UM   | UM  |
| AT1G02110 | UM   | UM   | UM  | UM  | UM  | UM  | UM   | UM  |
| AT1G02120 | UM   | UM   | UM  | UM  | UM  | UM  | UM   | UM  |
| AT1G02130 | UM   | UM   | UM  | UM  | UM  | UM  | UM   | UM  |
| AT1G02140 | UM   | UM   | UM  | UM  | UM  | UM  | UM   | UM  |
| AT1G02145 | gbM  | UM   | gbM | UM  | UM  | UM  | gbM  | UM  |
| AT1G02150 | UM   | UM   | UM  | UM  | UM  | UM  | UM   | UM  |
| AT1G02160 | UM   | UM   | UM  | UM  | UM  | UM  | UM   | UM  |
| AT1G02170 | UM   | UM   | UM  | UM  | UM  | UM  | UM   | UM  |
| AT1G02180 | UM   | UM   | UM  | UM  | UM  | UM  | UM   | UM  |
| AT1G02190 | UM   | UM   | UM  | UM  | UM  | UM  | UM   | UM  |
| AT1G02205 | UM   | UM   | UM  | UM  | UM  | UM  | UM   | UM  |
| AT1G02210 | UM   | UM   | UM  | UM  | UM  | UM  | UM   | UM  |
| AT1G02220 | UM   | UM   | UM  | UM  | UM  | UM  | UM   | UM  |
| AT1G02230 | UM   | UM   | UM  | UM  | UM  | UM  | UM   | UM  |
| AT1G02250 | UM   | UM   | UM  | UM  | UM  | UM  | UM   | UM  |
| AT1G02260 | UM   | UM   | UM  | UM  | UM  | UM  | UM   | UM  |
| AT1G02270 | mCHH | UM   | UM  | UM  | UM  | UM  | mCHH | UM  |
| AT1G02280 | UM   | UM   | UM  | UM  | UM  | UM  | UM   | UM  |
| AT1G02290 | UM   | UM   | UM  | UM  | UM  | UM  | UM   | UM  |
| AT1G02300 | UM   | UM   | UM  | UM  | UM  | UM  | mCHH | UM  |
| AT1G02305 | UM   | UM   | UM  | UM  | UM  | UM  | UM   | UM  |
| AT1G02310 | UM   | UM   | UM  | UM  | UM  | UM  | UM   | UM  |
| AT1G02320 | UM   | UM   | UM  | UM  | UM  | UM  | UM   | UM  |
| AT1G02330 | UM   | UM   | UM  | UM  | UM  | UM  | UM   | UM  |
| AT1G02335 | UM   | UM   | UM  | UM  | UM  | UM  | UM   | UM  |
| AT1G02340 | UM   | UM   | UM  | UM  | UM  | UM  | UM   | UM  |
| AT1G02350 | UM   | UM   | UM  | UM  | UM  | UM  | UM   | UM  |





|           |      |      |      |     |     |     |      |     |
|-----------|------|------|------|-----|-----|-----|------|-----|
| AT1G02816 | UM   | UM   | UM   | UM  | UM  | UM  | UM   | UM  |
| AT1G02820 | UM   | UM   | UM   | UM  | UM  | UM  | UM   | UM  |
| AT1G02830 | UM   | UM   | UM   | UM  | UM  | UM  | UM   | UM  |
| AT1G02840 | gbM  | gbM  | UM   | UM  | gbM | gbM | gbM  | gbM |
| AT1G02850 | UM   | UM   | UM   | UM  | UM  | UM  | UM   | UM  |
| AT1G02860 | UM   | UM   | UM   | UM  | UM  | UM  | UM   | UM  |
| AT1G02870 | UM   | UM   | UM   | UM  | UM  | UM  | UM   | UM  |
| AT1G02880 | UM   | UM   | UM   | UM  | UM  | UM  | UM   | UM  |
| AT1G02890 | gbM  | mCHH | gbM  | gbM | gbM | gbM | mCHH | gbM |
| AT1G02900 | UM   | UM   | UM   | UM  | UM  | UM  | UM   | UM  |
| AT1G02910 | gbM  | gbM  | gbM  | gbM | gbM | gbM | gbM  | gbM |
| AT1G02920 | UM   | UM   | UM   | UM  | UM  | UM  | UM   | UM  |
| AT1G02930 | UM   | UM   | UM   | UM  | UM  | UM  | UM   | UM  |
| AT1G02940 | UM   | UM   | UM   | UM  | UM  | UM  | UM   | UM  |
| AT1G02950 | UM   | UM   | UM   | UM  | UM  | UM  | UM   | UM  |
| AT1G02960 | UM   | UM   | UM   | UM  | UM  | UM  | UM   | UM  |
| AT1G02965 | UM   | UM   | UM   | UM  | UM  | UM  | UM   | UM  |
| AT1G02970 | UM   | UM   | UM   | UM  | UM  | UM  | UM   | UM  |
| AT1G02980 | UM   | UM   | UM   | UM  | UM  | UM  | UM   | UM  |
| AT1G02990 | mCHH | mCHH | mCHH | gbM | gbM | gbM | mCHH | gbM |
| AT1G03000 | gbM  | gbM  | gbM  | UM  | UM  | UM  | gbM  | UM  |
| AT1G03010 | UM   | UM   | UM   | UM  | UM  | UM  | UM   | UM  |
| AT1G03020 | UM   | UM   | UM   | UM  | UM  | UM  | UM   | UM  |
| AT1G03022 | UM   | UM   | UM   | UM  | UM  | UM  | UM   | UM  |
| AT1G03030 | UM   | UM   | UM   | UM  | UM  | UM  | UM   | UM  |
| AT1G03040 | UM   | UM   | UM   | UM  | UM  | UM  | UM   | UM  |
| AT1G03050 | UM   | UM   | UM   | UM  | UM  | UM  | UM   | UM  |
| AT1G03055 | UM   | UM   | UM   | UM  | UM  | UM  | UM   | UM  |
| AT1G03060 | gbM  | mCHH | gbM  | gbM | gbM | gbM | mCHH | gbM |
| AT1G03070 | UM   | UM   | UM   | UM  | UM  | UM  | UM   | UM  |
| AT1G03080 | UM   | UM   | UM   | UM  | UM  | UM  | mCHH | UM  |
| AT1G03090 | UM   | UM   | UM   | UM  | UM  | UM  | UM   | UM  |
| AT1G03100 | gbM  | gbM  | gbM  | gbM | gbM | gbM | gbM  | gbM |
| AT1G03103 | UM   | UM   | UM   | UM  | UM  | UM  | UM   | UM  |
| AT1G03106 | UM   | UM   | UM   | UM  | UM  | UM  | UM   | UM  |
| AT1G03110 | UM   | UM   | UM   | UM  | UM  | UM  | UM   | UM  |
| AT1G03120 | UM   | UM   | UM   | UM  | UM  | UM  | UM   | UM  |
| AT1G03130 | UM   | UM   | UM   | UM  | UM  | UM  | UM   | UM  |
| AT1G03140 | UM   | UM   | UM   | UM  | UM  | UM  | UM   | UM  |
| AT1G03150 | UM   | UM   | UM   | UM  | UM  | UM  | UM   | UM  |
| AT1G03160 | UM   | UM   | UM   | UM  | UM  | UM  | UM   | UM  |
| AT1G03170 | UM   | UM   | UM   | UM  | UM  | UM  | UM   | UM  |
| AT1G03180 | UM   | UM   | UM   | UM  | UM  | UM  | UM   | UM  |
| AT1G03190 | gbM  | gbM  | gbM  | UM  | UM  | UM  | gbM  | gbM |
| AT1G03200 | UM   | UM   | UM   | UM  | UM  | UM  | UM   | UM  |
| AT1G03210 | UM   | UM   | UM   | UM  | UM  | UM  | UM   | UM  |
| AT1G03220 | UM   | UM   | UM   | UM  | UM  | UM  | UM   | UM  |
| AT1G03230 | UM   | UM   | UM   | UM  | UM  | UM  | UM   | UM  |

|           |      |      |     |     |     |     |      |     |
|-----------|------|------|-----|-----|-----|-----|------|-----|
| AT1G03240 | mCHH | mCHH | UM  | UM  | UM  | UM  | mCHH | UM  |
| AT1G03250 | UM   | UM   | UM  | UM  | UM  | UM  | UM   | UM  |
| AT1G03260 | UM   | UM   | UM  | UM  | UM  | UM  | UM   | UM  |
| AT1G03270 | UM   | UM   | UM  | UM  | UM  | UM  | mCHH | UM  |
| AT1G03280 | gbM  | gbM  | gbM | gbM | gbM | gbM | mCHH | gbM |
| AT1G03290 | UM   | mCHH | UM  | UM  | UM  | UM  | UM   | UM  |
| AT1G03300 | UM   | mCHH | UM  | UM  | UM  | UM  | UM   | UM  |
| AT1G03310 | UM   | UM   | UM  | UM  | UM  | UM  | mCHH | UM  |
| AT1G03320 | UM   | UM   | UM  | UM  | UM  | UM  | UM   | UM  |
| AT1G03330 | UM   | UM   | UM  | UM  | UM  | UM  | UM   | UM  |
| AT1G03340 | UM   | UM   | UM  | UM  | UM  | UM  | UM   | UM  |
| AT1G03350 | UM   | UM   | UM  | UM  | UM  | UM  | UM   | UM  |
| AT1G03360 | UM   | UM   | UM  | UM  | UM  | UM  | UM   | UM  |
| AT1G03365 | mCHG | mCHH | gbM | gbM | gbM | gbM | mCHH | gbM |
| AT1G03370 | UM   | UM   | UM  | UM  | UM  | UM  | UM   | UM  |
| AT1G03380 | UM   | UM   | UM  | UM  | UM  | UM  | UM   | UM  |
| AT1G03390 | UM   | UM   | UM  | UM  | UM  | UM  | UM   | UM  |
| AT1G03400 | UM   | UM   | UM  | UM  | UM  | UM  | UM   | UM  |
| AT1G03410 | UM   | UM   | UM  | UM  | UM  | UM  | UM   | UM  |
| AT1G03430 | UM   | UM   | UM  | UM  | UM  | UM  | UM   | UM  |
| AT1G03440 | UM   | UM   | UM  | UM  | UM  | UM  | UM   | UM  |
| AT1G03445 | UM   | UM   | UM  | UM  | UM  | UM  | UM   | UM  |
| AT1G03457 | UM   | UM   | UM  | UM  | UM  | UM  | UM   | UM  |
| AT1G03470 | mCHH | UM   | UM  | UM  | UM  | UM  | UM   | UM  |
| AT1G03475 | UM   | UM   | UM  | UM  | UM  | UM  | UM   | UM  |
| AT1G03490 | UM   | UM   | UM  | UM  | UM  | UM  | UM   | UM  |
| AT1G03495 | UM   | UM   | UM  | UM  | UM  | UM  | UM   | UM  |
| AT1G03510 | UM   | mCHG | UM  | UM  | UM  | UM  | UM   | UM  |
| AT1G03520 | UM   | gbM  | UM  | UM  | UM  | UM  | gbM  | UM  |
| AT1G03530 | UM   | UM   | UM  | gbM | UM  | UM  | gbM  | UM  |
| AT1G03540 | UM   | UM   | UM  | UM  | UM  | UM  | UM   | UM  |
| AT1G03550 | UM   | gbM  | gbM | UM  | UM  | gbM | gbM  | UM  |
| AT1G03560 | UM   | UM   | UM  | UM  | UM  | UM  | gbM  | UM  |
| AT1G03590 | UM   | UM   | UM  | UM  | UM  | UM  | UM   | UM  |
| AT1G03600 | UM   | UM   | UM  | UM  | UM  | UM  | UM   | UM  |
| AT1G03610 | UM   | UM   | UM  | UM  | UM  | UM  | UM   | UM  |
| AT1G03620 | UM   | UM   | UM  | UM  | UM  | UM  | UM   | UM  |
| AT1G03630 | UM   | UM   | UM  | UM  | UM  | UM  | mCHH | UM  |
| AT1G03650 | UM   | UM   | UM  | UM  | UM  | UM  | UM   | UM  |
| AT1G03660 | UM   | UM   | UM  | UM  | UM  | UM  | UM   | UM  |
| AT1G03670 | UM   | UM   | UM  | UM  | UM  | UM  | UM   | UM  |
| AT1G03680 | UM   | UM   | UM  | UM  | UM  | UM  | UM   | UM  |
| AT1G03687 | UM   | UM   | UM  | UM  | UM  | UM  | UM   | UM  |
| AT1G03700 | UM   | UM   | UM  | UM  | UM  | UM  | UM   | UM  |
| AT1G03710 | UM   | UM   | UM  | UM  | UM  | UM  | UM   | UM  |
| AT1G03720 | UM   | UM   | UM  | UM  | UM  | UM  | mCHH | UM  |
| AT1G03730 | UM   | UM   | UM  | UM  | UM  | UM  | UM   | UM  |
| AT1G03740 | UM   | UM   | UM  | UM  | UM  | UM  | UM   | UM  |



|           |     |     |     |     |     |     |      |     |
|-----------|-----|-----|-----|-----|-----|-----|------|-----|
| AT1G04210 | gbM  | gbM |
| AT1G04220 | UM   | UM  |
| AT1G04230 | UM   | UM  |
| AT1G04240 | UM   | UM  |
| AT1G04250 | UM   | UM  |
| AT1G04260 | UM   | UM  |
| AT1G04270 | UM   | UM  |
| AT1G04280 | UM   | UM  |
| AT1G04290 | UM   | UM  |
| AT1G04300 | gbM  | gbM |
| AT1G04310 | UM   | UM  |
| AT1G04330 | UM   | UM  |
| AT1G04340 | UM   | UM  |
| AT1G04350 | UM   | UM  |
| AT1G04360 | UM   | UM  |
| AT1G04370 | UM   | UM  |
| AT1G04380 | UM   | UM  |
| AT1G04390 | gbM  | gbM |
| AT1G04400 | gbM  | gbM |
| AT1G04410 | UM   | UM  |
| AT1G04420 | UM   | UM  |
| AT1G04430 | gbM | gbM | gbM | gbM | gbM | gbM | mCHH | gbM |
| AT1G04440 | UM   | UM  |
| AT1G04445 | UM   | UM  |
| AT1G04450 | UM   | UM  |
| AT1G04470 | UM   | UM  |
| AT1G04480 | UM   | UM  |
| AT1G04490 | UM   | UM  |
| AT1G04500 | UM   | UM  |
| AT1G04501 | UM   | UM  |
| AT1G04510 | gbM | gbM | gbM | gbM | UM  | gbM | gbM  | gbM |
| AT1G04520 | UM   | UM  |
| AT1G04530 | UM   | UM  |
| AT1G04540 | UM   | UM  |
| AT1G04550 | UM   | UM  |
| AT1G04555 | UM  | UM  | UM  | UM  | UM  | UM  | mCHH | UM  |
| AT1G04560 | UM   | UM  |
| AT1G04570 | UM   | UM  |
| AT1G04580 | UM   | UM  |
| AT1G04590 | UM  | UM  | UM  | UM  | UM  | UM  | mCHH | UM  |
| AT1G04600 | UM  | UM  | UM  | UM  | UM  | UM  | mCHH | UM  |
| AT1G04610 | UM   | UM  |
| AT1G04620 | UM   | UM  |
| AT1G04625 | UM   | UM  |
| AT1G04630 | UM   | UM  |
| AT1G04635 | UM   | UM  |
| AT1G04640 | UM   | UM  |
| AT1G04645 | UM   | UM  |

|           |     |     |     |     |     |     |      |     |
|-----------|-----|-----|-----|-----|-----|-----|------|-----|
| AT1G04650 | UM   | UM  |
| AT1G04660 | UM   | UM  |
| AT1G04670 | UM   | UM  |
| AT1G04680 | UM   | UM  |
| AT1G04684 | UM   | UM  |
| AT1G04690 | UM   | UM  |
| AT1G04700 | gbM | gbM | gbM | gbM | gbM | gbM | mCHH | gbM |
| AT1G04710 | gbM | gbM | gbM | UM  | UM  | UM  | gbM  | UM  |
| AT1G04730 | gbM | gbM | gbM | gbM | UM  | UM  | mCHH | UM  |
| AT1G04750 | UM   | UM  |
| AT1G04760 | UM   | UM  |
| AT1G04770 | UM   | UM  |
| AT1G04778 | UM   | UM  |
| AT1G04780 | UM   | UM  |
| AT1G04790 | gbM | gbM | gbM | gbM | gbM | gbM | mCHG | gbM |
| AT1G04800 | UM   | UM  |
| AT1G04810 | gbM | gbM | gbM | gbM | gbM | gbM | mCHH | gbM |
| AT1G04820 | UM   | UM  |
| AT1G04830 | UM   | UM  |
| AT1G04840 | UM   | UM  |
| AT1G04850 | UM  | gbM | gbM | gbM | UM  | UM  | gbM  | UM  |
| AT1G04860 | gbM  | gbM |
| AT1G04870 | UM   | UM  |
| AT1G04880 | UM   | UM  |
| AT1G04890 | UM   | UM  |
| AT1G04900 | UM   | UM  |
| AT1G04910 | gbM  | gbM |
| AT1G04920 | UM   | UM  |
| AT1G04930 | UM   | UM  |
| AT1G04945 | UM   | UM  |
| AT1G04950 | UM   | UM  |
| AT1G04960 | UM  | UM  | UM  | UM  | UM  | UM  | mCHH | UM  |
| AT1G04970 | UM   | UM  |
| AT1G04980 | UM   | UM  |
| AT1G04985 | UM   | UM  |
| AT1G04990 | UM   | UM  |
| AT1G05000 | UM   | UM  |
| AT1G05010 | UM   | UM  |
| AT1G05020 | UM   | UM  |
| AT1G05030 | UM   | UM  |
| AT1G05040 | UM   | UM  |
| AT1G05055 | UM   | UM  |
| AT1G05060 | UM   | UM  |
| AT1G05065 | UM   | UM  |
| AT1G05070 | UM   | UM  |
| AT1G05080 | UM   | UM  |
| AT1G05085 | UM   | UM  |
| AT1G05090 | UM   | UM  |

|           |      |      |     |         |         |         |      |         |
|-----------|------|------|-----|---------|---------|---------|------|---------|
| AT1G05100 | UM   | UM   | UM  | UM      | UM      | UM      | UM   | UM      |
| AT1G05120 | UM   | mCHH | UM  | UM      | UM      | UM      | UM   | UM      |
| AT1G05136 | UM   | UM   | UM  | UM      | UM      | UM      | UM   | UM      |
| AT1G05140 | UM   | UM   | UM  | UM      | UM      | UM      | UM   | UM      |
| AT1G05150 | gbM  | gbM  | gbM | gbM     | UM      | UM      | gbM  | UM      |
| AT1G05160 | gbM  | gbM  | gbM | gbM     | UM      | gbM     | UM   | gbM     |
| AT1G05170 | UM   | UM   | UM  | UM      | UM      | UM      | UM   | UM      |
| AT1G05180 | UM   | UM   | UM  | UM      | UM      | UM      | UM   | UM      |
| AT1G05190 | UM   | UM   | UM  | UM      | UM      | UM      | UM   | UM      |
| AT1G05200 | gbM  | gbM  | gbM | gbM     | gbM     | gbM     | gbM  | gbM     |
| AT1G05205 | UM   | UM   | UM  | UM      | UM      | UM      | UM   | UM      |
| AT1G05210 | UM   | UM   | UM  | UM      | UM      | UM      | UM   | UM      |
| AT1G05220 | UM   | UM   | UM  | UM      | UM      | UM      | UM   | UM      |
| AT1G05230 | UM   | UM   | UM  | UM      | UM      | UM      | UM   | UM      |
| AT1G05240 | UM   | UM   | UM  | unknown | unknown | unknown | UM   | UM      |
| AT1G05250 | UM   | UM   | UM  | unknown | unknown | unknown | UM   | unknown |
| AT1G05260 | UM   | UM   | UM  | UM      | UM      | UM      | UM   | UM      |
| AT1G05270 | UM   | UM   | UM  | UM      | UM      | UM      | UM   | UM      |
| AT1G05280 | UM   | UM   | UM  | UM      | UM      | UM      | UM   | UM      |
| AT1G05290 | UM   | UM   | UM  | UM      | UM      | UM      | mCHH | UM      |
| AT1G05291 | UM   | UM   | UM  | UM      | UM      | UM      | UM   | UM      |
| AT1G05300 | UM   | UM   | UM  | UM      | UM      | UM      | UM   | UM      |
| AT1G05310 | UM   | UM   | UM  | UM      | UM      | UM      | UM   | UM      |
| AT1G05320 | mCHH | mCHH | UM  | UM      | UM      | UM      | mCHH | UM      |
| AT1G05330 | UM   | UM   | UM  | UM      | UM      | UM      | UM   | UM      |
| AT1G05340 | UM   | UM   | UM  | UM      | UM      | UM      | UM   | UM      |
| AT1G05350 | UM   | UM   | UM  | UM      | UM      | UM      | UM   | UM      |
| AT1G05360 | UM   | UM   | UM  | UM      | UM      | UM      | UM   | UM      |
| AT1G05370 | UM   | UM   | UM  | UM      | UM      | UM      | UM   | UM      |
| AT1G05380 | gbM  | gbM  | gbM | gbM     | gbM     | gbM     | mCHH | gbM     |
| AT1G05385 | UM   | UM   | UM  | UM      | UM      | UM      | UM   | UM      |
| AT1G05400 | UM   | UM   | UM  | UM      | UM      | UM      | UM   | UM      |
| AT1G05410 | gbM  | gbM  | gbM | gbM     | gbM     | UM      | mCHH | gbM     |
| AT1G05420 | UM   | UM   | UM  | UM      | UM      | UM      | UM   | UM      |
| AT1G05430 | UM   | UM   | UM  | UM      | UM      | UM      | UM   | UM      |
| AT1G05440 | UM   | UM   | UM  | UM      | UM      | UM      | UM   | UM      |
| AT1G05450 | UM   | UM   | UM  | UM      | UM      | UM      | UM   | UM      |
| AT1G05460 | gbM  | mCHH | gbM | gbM     | gbM     | gbM     | mCHH | UM      |
| AT1G05470 | gbM  | gbM  | gbM | gbM     | gbM     | UM      | mCHH | gbM     |
| AT1G05490 | UM   | UM   | UM  | UM      | UM      | UM      | mCHH | UM      |
| AT1G05500 | UM   | UM   | UM  | UM      | UM      | UM      | UM   | UM      |
| AT1G05510 | UM   | UM   | UM  | UM      | UM      | UM      | UM   | UM      |
| AT1G05520 | UM   | UM   | UM  | UM      | UM      | UM      | UM   | UM      |
| AT1G05530 | UM   | UM   | UM  | UM      | UM      | UM      | UM   | UM      |
| AT1G05540 | UM   | UM   | UM  | UM      | UM      | UM      | UM   | UM      |
| AT1G05550 | UM   | UM   | UM  | UM      | UM      | UM      | UM   | UM      |
| AT1G05560 | UM   | UM   | UM  | UM      | UM      | UM      | UM   | UM      |
| AT1G05570 | gbM  | mCHH | gbM | gbM     | gbM     | gbM     | mCHH | gbM     |

|           |     |      |     |     |     |     |      |     |
|-----------|-----|------|-----|-----|-----|-----|------|-----|
| AT1G05575 | UM  | UM   | UM  | UM  | UM  | UM  | UM   | UM  |
| AT1G05577 | UM  | UM   | UM  | UM  | UM  | UM  | UM   | UM  |
| AT1G05580 | UM  | UM   | UM  | UM  | UM  | UM  | UM   | UM  |
| AT1G05590 | UM  | UM   | UM  | UM  | UM  | UM  | UM   | UM  |
| AT1G05600 | UM  | UM   | UM  | UM  | UM  | UM  | UM   | UM  |
| AT1G05610 | UM  | UM   | UM  | UM  | UM  | UM  | UM   | UM  |
| AT1G05615 | UM  | UM   | UM  | UM  | UM  | UM  | UM   | UM  |
| AT1G05620 | UM  | UM   | UM  | UM  | UM  | UM  | UM   | UM  |
| AT1G05630 | gbM | gbM  | gbM | gbM | gbM | gbM | gbM  | gbM |
| AT1G05640 | gbM | gbM  | gbM | gbM | gbM | gbM | gbM  | gbM |
| AT1G05650 | UM  | UM   | UM  | UM  | UM  | UM  | UM   | UM  |
| AT1G05660 | UM  | UM   | UM  | UM  | UM  | UM  | UM   | UM  |
| AT1G05670 | UM  | gbM  | UM  | UM  | UM  | UM  | gbM  | UM  |
| AT1G05675 | UM  | UM   | UM  | UM  | UM  | UM  | UM   | UM  |
| AT1G05680 | UM  | UM   | UM  | UM  | UM  | UM  | UM   | UM  |
| AT1G05690 | UM  | UM   | UM  | UM  | UM  | UM  | UM   | UM  |
| AT1G05700 | UM  | UM   | UM  | UM  | UM  | UM  | UM   | UM  |
| AT1G05710 | UM  | UM   | UM  | UM  | UM  | UM  | UM   | UM  |
| AT1G05720 | UM  | UM   | UM  | UM  | UM  | UM  | UM   | UM  |
| AT1G05730 | UM  | UM   | UM  | UM  | UM  | UM  | UM   | UM  |
| AT1G05740 | UM  | UM   | UM  | UM  | UM  | UM  | UM   | UM  |
| AT1G05750 | UM  | UM   | UM  | UM  | UM  | UM  | mCHH | UM  |
| AT1G05760 | gbM | gbM  | UM  | UM  | UM  | UM  | UM   | UM  |
| AT1G05770 | UM  | UM   | UM  | UM  | UM  | UM  | UM   | UM  |
| AT1G05780 | UM  | UM   | UM  | UM  | UM  | UM  | UM   | UM  |
| AT1G05785 | UM  | UM   | UM  | UM  | UM  | UM  | UM   | UM  |
| AT1G05790 | gbM | UM   | UM  | UM  | UM  | UM  | mCHH | UM  |
| AT1G05800 | UM  | UM   | UM  | UM  | UM  | UM  | UM   | UM  |
| AT1G05805 | UM  | UM   | UM  | UM  | UM  | UM  | UM   | UM  |
| AT1G05810 | UM  | UM   | UM  | UM  | UM  | UM  | UM   | UM  |
| AT1G05820 | UM  | UM   | UM  | UM  | UM  | UM  | UM   | UM  |
| AT1G05830 | gbM | gbM  | gbM | gbM | gbM | gbM | gbM  | gbM |
| AT1G05835 | UM  | UM   | UM  | UM  | UM  | UM  | UM   | UM  |
| AT1G05840 | UM  | UM   | UM  | UM  | UM  | UM  | UM   | UM  |
| AT1G05850 | UM  | UM   | UM  | UM  | UM  | UM  | UM   | UM  |
| AT1G05860 | UM  | UM   | UM  | UM  | UM  | UM  | UM   | UM  |
| AT1G05870 | UM  | UM   | UM  | UM  | UM  | UM  | UM   | UM  |
| AT1G05880 | UM  | UM   | UM  | UM  | UM  | UM  | UM   | UM  |
| AT1G05890 | UM  | UM   | UM  | UM  | UM  | UM  | UM   | UM  |
| AT1G05894 | UM  | UM   | UM  | UM  | UM  | UM  | mCHH | UM  |
| AT1G05900 | UM  | UM   | UM  | UM  | UM  | UM  | UM   | UM  |
| AT1G05910 | gbM | gbM  | gbM | gbM | gbM | gbM | gbM  | gbM |
| AT1G05920 | UM  | UM   | UM  | UM  | UM  | UM  | mCHH | UM  |
| AT1G05925 | UM  | UM   | UM  | UM  | UM  | UM  | UM   | UM  |
| AT1G05930 | UM  | UM   | UM  | UM  | UM  | UM  | UM   | UM  |
| AT1G05940 | UM  | UM   | UM  | UM  | UM  | UM  | mCHH | UM  |
| AT1G05950 | UM  | UM   | UM  | UM  | UM  | UM  | UM   | UM  |
| AT1G05960 | gbM | mCHH | gbM | gbM | gbM | UM  | mCHH | gbM |



|           |      |      |     |     |     |     |      |     |
|-----------|------|------|-----|-----|-----|-----|------|-----|
| AT1G05970 | UM   | UM   | UM  | UM  | UM  | UM  | UM   | UM  |
| AT1G05990 | mCHH | UM   | UM  | UM  | UM  | UM  | UM   | UM  |
| AT1G06000 | UM   | UM   | UM  | UM  | UM  | UM  | UM   | UM  |
| AT1G06010 | UM   | UM   | UM  | UM  | UM  | UM  | UM   | UM  |
| AT1G06020 | UM   | UM   | UM  | UM  | UM  | UM  | UM   | UM  |
| AT1G06030 | UM   | UM   | UM  | UM  | UM  | UM  | UM   | UM  |
| AT1G06040 | UM   | UM   | UM  | UM  | UM  | UM  | UM   | UM  |
| AT1G06050 | UM   | UM   | UM  | UM  | UM  | UM  | UM   | UM  |
| AT1G06060 | UM   | UM   | UM  | UM  | UM  | UM  | UM   | UM  |
| AT1G06070 | UM   | UM   | UM  | UM  | UM  | UM  | UM   | UM  |
| AT1G06080 | UM   | UM   | UM  | UM  | UM  | UM  | UM   | UM  |
| AT1G06090 | UM   | UM   | UM  | UM  | UM  | UM  | UM   | UM  |
| AT1G06100 | UM   | UM   | UM  | UM  | UM  | UM  | UM   | UM  |
| AT1G06110 | UM   | UM   | UM  | UM  | UM  | UM  | UM   | UM  |
| AT1G06120 | UM   | UM   | UM  | UM  | UM  | UM  | UM   | UM  |
| AT1G06130 | UM   | UM   | UM  | UM  | UM  | UM  | UM   | UM  |
| AT1G06135 | UM   | UM   | UM  | UM  | UM  | UM  | UM   | UM  |
| AT1G06137 | UM   | UM   | UM  | UM  | UM  | UM  | UM   | UM  |
| AT1G06140 | UM   | UM   | UM  | UM  | UM  | UM  | UM   | UM  |
| AT1G06148 | UM   | UM   | UM  | UM  | UM  | UM  | UM   | UM  |
| AT1G06149 | UM   | UM   | UM  | UM  | UM  | UM  | UM   | UM  |
| AT1G06150 | UM   | UM   | UM  | UM  | UM  | UM  | mCHG | UM  |
| AT1G06160 | UM   | UM   | UM  | UM  | UM  | UM  | UM   | UM  |
| AT1G06170 | UM   | UM   | UM  | UM  | UM  | UM  | UM   | UM  |
| AT1G06180 | UM   | UM   | UM  | UM  | UM  | UM  | UM   | UM  |
| AT1G06190 | UM   | UM   | UM  | UM  | UM  | UM  | UM   | UM  |
| AT1G06200 | UM   | UM   | UM  | UM  | UM  | UM  | UM   | UM  |
| AT1G06210 | gbM  | gbM  | gbM | UM  | UM  | UM  | gbM  | UM  |
| AT1G06220 | UM   | UM   | UM  | UM  | UM  | UM  | UM   | UM  |
| AT1G06225 | UM   | UM   | UM  | UM  | UM  | UM  | UM   | UM  |
| AT1G06230 | UM   | UM   | UM  | UM  | UM  | UM  | UM   | UM  |
| AT1G06240 | UM   | UM   | UM  | UM  | UM  | UM  | mCHH | UM  |
| AT1G06250 | UM   | UM   | UM  | UM  | UM  | UM  | UM   | UM  |
| AT1G06260 | UM   | UM   | UM  | UM  | UM  | UM  | UM   | UM  |
| AT1G06270 | UM   | UM   | UM  | UM  | UM  | UM  | UM   | UM  |
| AT1G06280 | UM   | UM   | UM  | UM  | UM  | UM  | UM   | UM  |
| AT1G06290 | UM   | UM   | UM  | UM  | UM  | UM  | UM   | UM  |
| AT1G06310 | UM   | UM   | UM  | UM  | UM  | UM  | UM   | UM  |
| AT1G06320 | UM   | UM   | UM  | UM  | UM  | UM  | UM   | UM  |
| AT1G06330 | UM   | UM   | UM  | UM  | UM  | UM  | UM   | UM  |
| AT1G06340 | UM   | UM   | UM  | UM  | UM  | UM  | UM   | UM  |
| AT1G06350 | UM   | UM   | UM  | UM  | UM  | UM  | UM   | UM  |
| AT1G06360 | UM   | UM   | UM  | UM  | UM  | UM  | UM   | UM  |
| AT1G06380 | UM   | UM   | UM  | UM  | UM  | UM  | UM   | UM  |
| AT1G06390 | UM   | UM   | UM  | UM  | UM  | UM  | UM   | UM  |
| AT1G06400 | UM   | UM   | UM  | UM  | UM  | UM  | UM   | UM  |
| AT1G06410 | gbM  | gbM  | gbM | gbM | gbM | gbM | gbM  | gbM |
| AT1G06420 | UM   | mCHH | UM  | UM  | UM  | UM  | UM   | UM  |

|           |      |      |     |     |      |     |      |      |
|-----------|------|------|-----|-----|------|-----|------|------|
| AT1G06430 | UM   | UM   | UM  | UM  | UM   | UM  | UM   | UM   |
| AT1G06440 | UM   | UM   | UM  | UM  | UM   | UM  | UM   | UM   |
| AT1G06450 | UM   | UM   | UM  | UM  | UM   | UM  | UM   | UM   |
| AT1G06460 | UM   | mCHG | UM  | UM  | mCHG | UM  | UM   | mCHG |
| AT1G06470 | UM   | UM   | UM  | UM  | UM   | UM  | mCHH | UM   |
| AT1G06475 | UM   | UM   | UM  | UM  | UM   | UM  | UM   | UM   |
| AT1G06490 | mCHH | mCHH | gbM | gbM | gbM  | gbM | mCHH | gbM  |
| AT1G06500 | UM   | UM   | UM  | UM  | UM   | UM  | UM   | UM   |
| AT1G06510 | UM   | UM   | UM  | UM  | UM   | UM  | UM   | UM   |
| AT1G06515 | UM   | UM   | UM  | UM  | UM   | UM  | UM   | UM   |
| AT1G06520 | UM   | UM   | UM  | UM  | UM   | UM  | UM   | UM   |
| AT1G06530 | UM   | UM   | UM  | UM  | UM   | UM  | UM   | UM   |
| AT1G06540 | UM   | UM   | UM  | UM  | UM   | UM  | UM   | UM   |
| AT1G06550 | UM   | UM   | UM  | UM  | UM   | UM  | UM   | UM   |
| AT1G06560 | UM   | UM   | UM  | gbM | gbM  | UM  | UM   | UM   |
| AT1G06570 | UM   | UM   | UM  | UM  | UM   | UM  | UM   | UM   |
| AT1G06580 | UM   | UM   | UM  | UM  | UM   | UM  | UM   | UM   |
| AT1G06590 | gbM  | mCHH | gbM | UM  | UM   | UM  | gbM  | UM   |
| AT1G06620 | UM   | UM   | UM  | UM  | UM   | UM  | UM   | UM   |
| AT1G06630 | mCHH | UM   | UM  | UM  | UM   | UM  | UM   | UM   |
| AT1G06640 | UM   | UM   | UM  | UM  | UM   | UM  | UM   | UM   |
| AT1G06645 | UM   | UM   | UM  | UM  | UM   | UM  | UM   | UM   |
| AT1G06650 | UM   | UM   | UM  | UM  | UM   | UM  | UM   | UM   |
| AT1G06660 | UM   | UM   | UM  | UM  | UM   | UM  | UM   | UM   |
| AT1G06670 | gbM  | mCHH | gbM | gbM | gbM  | gbM | mCHH | gbM  |
| AT1G06680 | UM   | UM   | UM  | UM  | UM   | UM  | UM   | UM   |
| AT1G06690 | UM   | UM   | UM  | UM  | UM   | UM  | UM   | UM   |
| AT1G06700 | UM   | UM   | UM  | UM  | UM   | UM  | UM   | UM   |
| AT1G06710 | UM   | UM   | UM  | UM  | UM   | UM  | UM   | UM   |
| AT1G06720 | gbM  | gbM  | gbM | gbM | gbM  | UM  | mCHH | UM   |
| AT1G06730 | UM   | UM   | UM  | UM  | UM   | UM  | UM   | UM   |
| AT1G06750 | UM   | UM   | UM  | UM  | UM   | UM  | UM   | UM   |
| AT1G06760 | UM   | UM   | UM  | UM  | UM   | UM  | UM   | UM   |
| AT1G06770 | UM   | UM   | UM  | UM  | UM   | UM  | UM   | UM   |
| AT1G06780 | UM   | UM   | UM  | UM  | UM   | UM  | UM   | UM   |
| AT1G06790 | UM   | UM   | UM  | UM  | UM   | UM  | UM   | UM   |
| AT1G06800 | UM   | UM   | UM  | UM  | UM   | UM  | UM   | UM   |
| AT1G06810 | UM   | UM   | UM  | UM  | UM   | UM  | UM   | UM   |
| AT1G06820 | UM   | UM   | UM  | UM  | UM   | UM  | UM   | UM   |
| AT1G06830 | UM   | UM   | UM  | UM  | UM   | UM  | UM   | UM   |
| AT1G06840 | gbM  | gbM  | gbM | gbM | gbM  | gbM | mCHH | gbM  |
| AT1G06850 | UM   | UM   | UM  | UM  | UM   | UM  | UM   | UM   |
| AT1G06870 | UM   | UM   | UM  | UM  | UM   | UM  | UM   | UM   |
| AT1G06890 | UM   | UM   | UM  | UM  | UM   | UM  | UM   | UM   |
| AT1G06900 | gbM  | gbM  | gbM | gbM | gbM  | gbM | mCHH | gbM  |
| AT1G06910 | UM   | UM   | UM  | UM  | UM   | UM  | UM   | UM   |
| AT1G06920 | UM   | UM   | UM  | UM  | UM   | UM  | UM   | UM   |
| AT1G06923 | UM   | UM   | UM  | UM  | UM   | UM  | UM   | UM   |



|           |     |      |     |     |     |     |      |     |
|-----------|-----|------|-----|-----|-----|-----|------|-----|
| AT1G07390 | gbM | mCHH | gbM | UM  | gbM | UM  | mCHH | gbM |
| AT1G07400 | UM  | UM   | UM  | UM  | UM  | UM  | UM   | UM  |
| AT1G07410 | UM  | UM   | UM  | UM  | UM  | UM  | UM   | UM  |
| AT1G07420 | UM  | UM   | UM  | UM  | UM  | UM  | UM   | UM  |
| AT1G07430 | UM  | UM   | UM  | UM  | UM  | UM  | UM   | UM  |
| AT1G07440 | UM  | UM   | UM  | UM  | UM  | UM  | UM   | UM  |
| AT1G07450 | UM  | UM   | UM  | UM  | UM  | UM  | UM   | UM  |
| AT1G07460 | UM  | UM   | UM  | UM  | UM  | UM  | UM   | UM  |
| AT1G07470 | UM  | gbM  | UM  | UM  | UM  | UM  | gbM  | UM  |
| AT1G07473 | UM  | UM   | UM  | UM  | UM  | UM  | UM   | UM  |
| AT1G07476 | UM  | UM   | gbM | UM  | UM  | UM  | mCHH | UM  |
| AT1G07480 | gbM | gbM  | UM  | UM  | UM  | gbM | gbM  | UM  |
| AT1G07485 | UM  | UM   | UM  | UM  | UM  | UM  | UM   | UM  |
| AT1G07490 | UM  | UM   | UM  | UM  | UM  | UM  | UM   | UM  |
| AT1G07500 | UM  | UM   | UM  | UM  | UM  | UM  | UM   | UM  |
| AT1G07510 | gbM | gbM  | gbM | gbM | gbM | gbM | mCHH | gbM |
| AT1G07520 | UM  | UM   | UM  | UM  | UM  | UM  | UM   | UM  |
| AT1G07530 | gbM | gbM  | gbM | gbM | gbM | gbM | gbM  | gbM |
| AT1G07540 | UM  | UM   | UM  | UM  | UM  | UM  | UM   | UM  |
| AT1G07550 | UM  | UM   | UM  | UM  | UM  | UM  | UM   | UM  |
| AT1G07560 | UM  | UM   | UM  | UM  | UM  | UM  | UM   | UM  |
| AT1G07570 | UM  | UM   | UM  | UM  | UM  | UM  | UM   | UM  |
| AT1G07590 | UM  | mCHH | UM  | UM  | UM  | UM  | UM   | UM  |
| AT1G07600 | UM  | UM   | UM  | UM  | UM  | UM  | UM   | UM  |
| AT1G07610 | UM  | UM   | UM  | UM  | UM  | UM  | UM   | UM  |
| AT1G07615 | gbM | gbM  | gbM | gbM | gbM | gbM | gbM  | gbM |
| AT1G07620 | UM  | mCHH | UM  | UM  | UM  | UM  | mCHH | UM  |
| AT1G07630 | UM  | UM   | UM  | UM  | UM  | UM  | UM   | UM  |
| AT1G07640 | UM  | UM   | UM  | UM  | UM  | UM  | UM   | UM  |
| AT1G07645 | UM  | UM   | UM  | UM  | UM  | UM  | UM   | UM  |
| AT1G07650 | gbM | mCHH | gbM | gbM | UM  | UM  | mCHH | UM  |
| AT1G07660 | UM  | UM   | UM  | UM  | UM  | UM  | UM   | UM  |
| AT1G07670 | gbM | gbM  | gbM | gbM | gbM | gbM | gbM  | gbM |
| AT1G07680 | UM  | UM   | UM  | UM  | UM  | UM  | UM   | UM  |
| AT1G07690 | UM  | UM   | UM  | UM  | UM  | UM  | UM   | UM  |
| AT1G07700 | UM  | UM   | UM  | UM  | UM  | UM  | UM   | UM  |
| AT1G07705 | gbM | gbM  | gbM | gbM | gbM | gbM | mCHH | gbM |
| AT1G07710 | gbM | mCHG | gbM | gbM | gbM | gbM | gbM  | gbM |
| AT1G07720 | UM  | UM   | UM  | UM  | UM  | UM  | UM   | UM  |
| AT1G07725 | UM  | UM   | UM  | UM  | UM  | UM  | UM   | UM  |
| AT1G07730 | gbM | gbM  | gbM | gbM | gbM | gbM | gbM  | gbM |
| AT1G07740 | UM  | UM   | UM  | UM  | UM  | UM  | UM   | UM  |
| AT1G07745 | UM  | UM   | UM  | UM  | UM  | UM  | UM   | UM  |
| AT1G07747 | UM  | UM   | UM  | UM  | UM  | UM  | UM   | UM  |
| AT1G07750 | UM  | UM   | UM  | UM  | UM  | UM  | UM   | UM  |
| AT1G07770 | UM  | UM   | UM  | UM  | UM  | UM  | UM   | UM  |
| AT1G07780 | gbM | gbM  | gbM | gbM | UM  | gbM | gbM  | gbM |
| AT1G07790 | UM  | UM   | UM  | UM  | UM  | UM  | UM   | UM  |

|           |      |      |     |     |     |     |      |     |
|-----------|------|------|-----|-----|-----|-----|------|-----|
| AT1G07795 | UM   | UM   | UM  | UM  | UM  | UM  | UM   | UM  |
| AT1G07810 | gbM  | gbM  | gbM | gbM | gbM | gbM | gbM  | gbM |
| AT1G07820 | UM   | UM   | UM  | UM  | UM  | UM  | UM   | UM  |
| AT1G07830 | UM   | UM   | UM  | UM  | UM  | UM  | UM   | UM  |
| AT1G07840 | UM   | UM   | UM  | UM  | UM  | UM  | UM   | UM  |
| AT1G07850 | UM   | UM   | UM  | UM  | UM  | UM  | UM   | UM  |
| AT1G07860 | UM   | UM   | UM  | UM  | UM  | UM  | UM   | UM  |
| AT1G07870 | UM   | UM   | UM  | UM  | UM  | UM  | UM   | UM  |
| AT1G07880 | UM   | UM   | UM  | UM  | UM  | UM  | UM   | UM  |
| AT1G07885 | UM   | UM   | UM  | UM  | UM  | UM  | UM   | UM  |
| AT1G07890 | UM   | UM   | UM  | UM  | UM  | UM  | UM   | UM  |
| AT1G07900 | UM   | UM   | UM  | UM  | UM  | UM  | UM   | UM  |
| AT1G07901 | UM   | UM   | UM  | UM  | UM  | UM  | UM   | UM  |
| AT1G07910 | gbM  | gbM  | gbM | gbM | gbM | gbM | mCHH | gbM |
| AT1G07920 | UM   | UM   | UM  | UM  | UM  | UM  | UM   | UM  |
| AT1G07930 | UM   | UM   | UM  | UM  | UM  | UM  | UM   | UM  |
| AT1G07940 | UM   | UM   | UM  | UM  | UM  | UM  | UM   | UM  |
| AT1G07950 | UM   | UM   | UM  | UM  | UM  | UM  | UM   | UM  |
| AT1G07960 | UM   | UM   | UM  | UM  | UM  | UM  | UM   | UM  |
| AT1G07970 | gbM  | gbM  | gbM | gbM | gbM | gbM | gbM  | gbM |
| AT1G07980 | UM   | UM   | UM  | UM  | UM  | UM  | UM   | UM  |
| AT1G07985 | UM   | UM   | UM  | UM  | UM  | UM  | UM   | UM  |
| AT1G07990 | gbM  | mCHH | gbM | gbM | gbM | gbM | mCHH | gbM |
| AT1G08000 | UM   | UM   | UM  | UM  | UM  | UM  | UM   | UM  |
| AT1G08005 | UM   | UM   | UM  | UM  | UM  | UM  | UM   | UM  |
| AT1G08010 | gbM  | gbM  | gbM | gbM | UM  | gbM | gbM  | gbM |
| AT1G08030 | UM   | UM   | UM  | UM  | UM  | UM  | mCHH | UM  |
| AT1G08032 | UM   | UM   | UM  | UM  | UM  | UM  | UM   | UM  |
| AT1G08035 | UM   | UM   | UM  | UM  | UM  | UM  | UM   | UM  |
| AT1G08040 | UM   | UM   | gbM | UM  | UM  | gbM | UM   | UM  |
| AT1G08050 | UM   | UM   | UM  | UM  | UM  | UM  | UM   | UM  |
| AT1G08060 | mCHH | mCHH | gbM | gbM | gbM | gbM | mCHH | gbM |
| AT1G08065 | UM   | UM   | UM  | UM  | UM  | UM  | UM   | UM  |
| AT1G08070 | UM   | UM   | UM  | UM  | UM  | UM  | UM   | UM  |
| AT1G08080 | UM   | UM   | UM  | UM  | UM  | UM  | UM   | UM  |
| AT1G08090 | UM   | UM   | UM  | UM  | UM  | UM  | UM   | UM  |
| AT1G08100 | UM   | UM   | UM  | UM  | UM  | UM  | UM   | UM  |
| AT1G08110 | UM   | UM   | UM  | UM  | UM  | UM  | UM   | UM  |
| AT1G08120 | UM   | UM   | UM  | UM  | UM  | UM  | UM   | UM  |
| AT1G08125 | gbM  | gbM  | gbM | gbM | gbM | gbM | gbM  | gbM |
| AT1G08130 | UM   | UM   | UM  | UM  | UM  | UM  | gbM  | UM  |
| AT1G08135 | UM   | UM   | UM  | UM  | UM  | UM  | UM   | UM  |
| AT1G08140 | UM   | UM   | UM  | UM  | UM  | UM  | mCHH | UM  |
| AT1G08150 | UM   | UM   | UM  | UM  | UM  | UM  | UM   | UM  |
| AT1G08160 | UM   | UM   | UM  | UM  | UM  | UM  | UM   | UM  |
| AT1G08165 | UM   | UM   | UM  | UM  | UM  | UM  | UM   | UM  |
| AT1G08170 | UM   | UM   | UM  | UM  | UM  | UM  | UM   | UM  |
| AT1G08180 | UM   | UM   | UM  | UM  | UM  | UM  | UM   | UM  |

|           |     |      |     |     |     |     |      |     |
|-----------|-----|------|-----|-----|-----|-----|------|-----|
| AT1G08190 | gbM | gbM  | UM  | UM  | UM  | UM  | mCHH | UM  |
| AT1G08200 | UM  | UM   | UM  | UM  | UM  | UM  | UM   | UM  |
| AT1G08210 | UM  | UM   | UM  | UM  | UM  | UM  | UM   | UM  |
| AT1G08220 | UM  | UM   | UM  | UM  | UM  | UM  | UM   | UM  |
| AT1G08230 | UM  | UM   | UM  | UM  | UM  | UM  | mCHH | UM  |
| AT1G08250 | UM  | UM   | UM  | UM  | UM  | UM  | UM   | UM  |
| AT1G08260 | gbM | mCHH | gbM | gbM | gbM | gbM | mCHH | gbM |
| AT1G08270 | UM  | UM   | UM  | UM  | UM  | UM  | UM   | UM  |
| AT1G08280 | UM  | UM   | UM  | UM  | UM  | UM  | UM   | UM  |
| AT1G08290 | UM  | UM   | UM  | UM  | UM  | UM  | UM   | UM  |
| AT1G08300 | UM  | UM   | UM  | UM  | UM  | UM  | UM   | UM  |
| AT1G08310 | UM  | UM   | UM  | UM  | gbM | UM  | UM   | UM  |
| AT1G08315 | UM  | UM   | UM  | UM  | UM  | UM  | UM   | UM  |
| AT1G08320 | UM  | UM   | UM  | UM  | UM  | UM  | UM   | UM  |
| AT1G08340 | UM  | UM   | UM  | UM  | UM  | UM  | UM   | UM  |
| AT1G08350 | gbM | gbM  | gbM | UM  | UM  | UM  | mCHH | UM  |
| AT1G08360 | UM  | UM   | UM  | UM  | UM  | UM  | UM   | UM  |
| AT1G08370 | UM  | UM   | UM  | UM  | UM  | UM  | UM   | UM  |
| AT1G08380 | UM  | UM   | UM  | UM  | UM  | UM  | UM   | UM  |
| AT1G08390 | UM  | UM   | UM  | UM  | UM  | UM  | UM   | UM  |
| AT1G08400 | UM  | UM   | UM  | UM  | UM  | UM  | UM   | UM  |
| AT1G08410 | gbM | mCHH | gbM | gbM | gbM | gbM | mCHH | UM  |
| AT1G08420 | gbM | gbM  | gbM | gbM | gbM | gbM | gbM  | gbM |
| AT1G08430 | UM  | UM   | UM  | UM  | UM  | UM  | mCHH | UM  |
| AT1G08440 | UM  | UM   | UM  | UM  | UM  | UM  | UM   | UM  |
| AT1G08450 | gbM | gbM  | gbM | gbM | gbM | gbM | gbM  | gbM |
| AT1G08460 | UM  | UM   | UM  | UM  | UM  | UM  | UM   | UM  |
| AT1G08465 | UM  | UM   | UM  | UM  | UM  | UM  | UM   | UM  |
| AT1G08470 | UM  | UM   | UM  | UM  | UM  | UM  | UM   | UM  |
| AT1G08480 | UM  | UM   | UM  | UM  | UM  | UM  | UM   | UM  |
| AT1G08490 | UM  | UM   | UM  | UM  | UM  | UM  | mCHH | UM  |
| AT1G08500 | UM  | UM   | UM  | UM  | UM  | UM  | UM   | UM  |
| AT1G08510 | UM  | UM   | UM  | UM  | UM  | UM  | UM   | UM  |
| AT1G08520 | UM  | UM   | UM  | UM  | UM  | UM  | mCHH | UM  |
| AT1G08530 | UM  | UM   | UM  | UM  | UM  | UM  | UM   | UM  |
| AT1G08540 | gbM | gbM  | gbM | gbM | gbM | gbM | gbM  | gbM |
| AT1G08550 | gbM | gbM  | gbM | gbM | gbM | gbM | gbM  | gbM |
| AT1G08560 | UM  | UM   | UM  | UM  | UM  | UM  | UM   | UM  |
| AT1G08570 | UM  | UM   | UM  | UM  | UM  | UM  | UM   | UM  |
| AT1G08580 | UM  | UM   | UM  | UM  | UM  | UM  | UM   | UM  |
| AT1G08590 | UM  | UM   | UM  | UM  | UM  | UM  | UM   | UM  |
| AT1G08600 | gbM | gbM  | gbM | gbM | gbM | gbM | mCHH | gbM |
| AT1G08610 | UM  | UM   | UM  | UM  | UM  | gbM | UM   | UM  |
| AT1G08620 | gbM | gbM  | gbM | gbM | gbM | gbM | gbM  | gbM |
| AT1G08630 | UM  | UM   | UM  | UM  | UM  | UM  | UM   | UM  |
| AT1G08640 | UM  | UM   | UM  | UM  | UM  | UM  | UM   | UM  |
| AT1G08650 | UM  | UM   | UM  | UM  | UM  | UM  | UM   | UM  |
| AT1G08660 | UM  | UM   | UM  | UM  | UM  | UM  | UM   | UM  |

|           |      |      |      |      |     |      |      |      |
|-----------|------|------|------|------|-----|------|------|------|
| AT1G08670 | UM   | UM   | UM   | UM   | UM  | UM   | UM   | UM   |
| AT1G08680 | gbM  | gbM  | gbM  | gbM  | gbM | gbM  | gbM  | gbM  |
| AT1G08695 | UM   | UM   | UM   | UM   | UM  | UM   | UM   | UM   |
| AT1G08700 | UM   | UM   | UM   | UM   | UM  | UM   | UM   | UM   |
| AT1G08710 | UM   | UM   | UM   | UM   | UM  | UM   | UM   | UM   |
| AT1G08720 | gbM  | gbM  | gbM  | gbM  | gbM | UM   | gbM  | UM   |
| AT1G08730 | UM   | mCHH | UM   | UM   | UM  | UM   | mCHH | UM   |
| AT1G08750 | UM   | UM   | UM   | UM   | UM  | UM   | UM   | UM   |
| AT1G08760 | UM   | UM   | UM   | UM   | UM  | UM   | gbM  | UM   |
| AT1G08770 | UM   | UM   | UM   | UM   | UM  | UM   | UM   | UM   |
| AT1G08780 | UM   | UM   | UM   | UM   | UM  | UM   | UM   | UM   |
| AT1G08790 | UM   | UM   | UM   | UM   | UM  | UM   | UM   | UM   |
| AT1G08800 | UM   | UM   | UM   | UM   | UM  | UM   | UM   | UM   |
| AT1G08810 | UM   | UM   | UM   | UM   | UM  | UM   | UM   | UM   |
| AT1G08820 | gbM  | gbM  | gbM  | gbM  | gbM | gbM  | gbM  | UM   |
| AT1G08830 | UM   | UM   | UM   | UM   | UM  | UM   | UM   | UM   |
| AT1G08840 | gbM  | gbM  | gbM  | gbM  | gbM | gbM  | mCHH | gbM  |
| AT1G08845 | UM   | UM   | UM   | UM   | UM  | UM   | UM   | UM   |
| AT1G08860 | UM   | UM   | UM   | UM   | UM  | UM   | UM   | UM   |
| AT1G08880 | UM   | UM   | UM   | UM   | UM  | UM   | UM   | UM   |
| AT1G08890 | UM   | UM   | UM   | UM   | UM  | UM   | UM   | UM   |
| AT1G08900 | UM   | UM   | UM   | UM   | UM  | UM   | UM   | UM   |
| AT1G08910 | gbM  | gbM  | UM   | UM   | UM  | UM   | gbM  | UM   |
| AT1G08920 | UM   | UM   | UM   | UM   | UM  | UM   | UM   | UM   |
| AT1G08930 | UM   | UM   | UM   | UM   | UM  | UM   | mCHH | UM   |
| AT1G08940 | UM   | UM   | UM   | UM   | UM  | UM   | gbM  | UM   |
| AT1G08960 | UM   | UM   | UM   | UM   | UM  | UM   | UM   | UM   |
| AT1G08970 | gbM  | gbM  | gbM  | gbM  | UM  | UM   | gbM  | gbM  |
| AT1G08980 | UM   | UM   | UM   | UM   | UM  | UM   | UM   | UM   |
| AT1G08985 | UM   | UM   | UM   | UM   | UM  | UM   | UM   | UM   |
| AT1G08990 | UM   | UM   | UM   | UM   | UM  | UM   | UM   | UM   |
| AT1G09000 | UM   | UM   | UM   | UM   | UM  | UM   | UM   | UM   |
| AT1G09010 | UM   | gbM  | UM   | UM   | UM  | UM   | UM   | UM   |
| AT1G09020 | gbM  | gbM  | gbM  | gbM  | gbM | gbM  | gbM  | gbM  |
| AT1G09026 | mCHH | mCHH | mCHH | mCHG | gbM | mCHG | mCHH | mCHG |
| AT1G09030 | UM   | UM   | UM   | UM   | UM  | UM   | UM   | UM   |
| AT1G09040 | UM   | mCHH | UM   | UM   | UM  | UM   | UM   | UM   |
| AT1G09050 | gbM  | mCHH | gbM  | gbM  | gbM | gbM  | gbM  | gbM  |
| AT1G09060 | gbM  | gbM  | gbM  | gbM  | gbM | gbM  | mCHH | gbM  |
| AT1G09070 | UM   | UM   | UM   | UM   | UM  | UM   | UM   | UM   |
| AT1G09080 | UM   | UM   | UM   | UM   | UM  | UM   | UM   | UM   |
| AT1G09090 | UM   | UM   | UM   | UM   | UM  | UM   | mCHH | UM   |
| AT1G09100 | gbM  | gbM  | gbM  | UM   | UM  | UM   | gbM  | UM   |
| AT1G09130 | UM   | UM   | UM   | UM   | UM  | UM   | UM   | UM   |
| AT1G09140 | UM   | UM   | UM   | UM   | UM  | UM   | UM   | UM   |
| AT1G09150 | UM   | UM   | UM   | UM   | UM  | UM   | UM   | UM   |
| AT1G09155 | UM   | UM   | UM   | UM   | UM  | UM   | UM   | UM   |
| AT1G09157 | UM   | UM   | UM   | UM   | UM  | UM   | UM   | UM   |

|           |     |      |     |      |     |      |      |      |
|-----------|-----|------|-----|------|-----|------|------|------|
| AT1G09160 | UM  | UM   | UM  | UM   | UM  | UM   | UM   | UM   |
| AT1G09170 | UM  | mCHH | UM  | UM   | UM  | UM   | mCHH | UM   |
| AT1G09176 | UM  | UM   | UM  | UM   | UM  | UM   | UM   | UM   |
| AT1G09180 | UM  | UM   | UM  | UM   | UM  | UM   | UM   | UM   |
| AT1G09190 | UM  | UM   | UM  | UM   | UM  | UM   | UM   | UM   |
| AT1G09195 | UM  | UM   | UM  | UM   | UM  | UM   | UM   | UM   |
| AT1G09200 | UM  | UM   | UM  | UM   | UM  | UM   | UM   | UM   |
| AT1G09210 | UM  | UM   | UM  | UM   | UM  | UM   | UM   | UM   |
| AT1G09220 | UM  | UM   | UM  | UM   | UM  | UM   | UM   | UM   |
| AT1G09230 | UM  | UM   | UM  | UM   | UM  | UM   | UM   | UM   |
| AT1G09240 | UM  | UM   | UM  | UM   | UM  | UM   | UM   | UM   |
| AT1G09245 | UM  | UM   | UM  | UM   | UM  | UM   | UM   | UM   |
| AT1G09250 | UM  | UM   | UM  | UM   | UM  | UM   | UM   | UM   |
| AT1G09260 | UM  | UM   | UM  | mCHH | UM  | mCHH | UM   | mCHH |
| AT1G09270 | UM  | UM   | UM  | UM   | UM  | UM   | UM   | UM   |
| AT1G09280 | gbM | gbM  | gbM | gbM  | gbM | gbM  | gbM  | gbM  |
| AT1G09290 | UM  | UM   | UM  | UM   | UM  | UM   | UM   | UM   |
| AT1G09300 | gbM | gbM  | UM  | UM   | UM  | UM   | UM   | UM   |
| AT1G09310 | UM  | UM   | UM  | UM   | UM  | UM   | UM   | UM   |
| AT1G09320 | UM  | UM   | UM  | UM   | UM  | UM   | UM   | UM   |
| AT1G09330 | UM  | UM   | UM  | UM   | UM  | UM   | UM   | UM   |
| AT1G09340 | UM  | UM   | UM  | UM   | UM  | UM   | UM   | UM   |
| AT1G09350 | UM  | UM   | UM  | UM   | UM  | UM   | UM   | UM   |
| AT1G09360 | UM  | UM   | UM  | UM   | UM  | UM   | UM   | UM   |
| AT1G09370 | UM  | UM   | UM  | UM   | UM  | UM   | UM   | UM   |
| AT1G09380 | UM  | UM   | UM  | UM   | UM  | UM   | UM   | UM   |
| AT1G09390 | UM  | UM   | UM  | UM   | UM  | UM   | UM   | UM   |
| AT1G09400 | UM  | UM   | UM  | UM   | UM  | UM   | UM   | UM   |
| AT1G09410 | UM  | UM   | UM  | UM   | UM  | UM   | UM   | UM   |
| AT1G09415 | UM  | UM   | UM  | UM   | UM  | UM   | UM   | UM   |
| AT1G09420 | UM  | UM   | UM  | UM   | UM  | UM   | UM   | UM   |
| AT1G09430 | UM  | UM   | UM  | UM   | UM  | UM   | UM   | UM   |
| AT1G09440 | UM  | UM   | UM  | UM   | UM  | UM   | UM   | UM   |
| AT1G09450 | UM  | UM   | UM  | UM   | UM  | UM   | UM   | UM   |
| AT1G09460 | UM  | UM   | UM  | UM   | UM  | UM   | UM   | UM   |
| AT1G09470 | UM  | UM   | UM  | UM   | UM  | UM   | UM   | UM   |
| AT1G09480 | UM  | UM   | UM  | UM   | UM  | UM   | UM   | UM   |
| AT1G09483 | UM  | UM   | UM  | UM   | UM  | UM   | UM   | UM   |
| AT1G09490 | UM  | UM   | UM  | UM   | UM  | UM   | UM   | UM   |
| AT1G09500 | UM  | UM   | UM  | UM   | UM  | UM   | UM   | UM   |
| AT1G09510 | UM  | UM   | UM  | UM   | UM  | UM   | UM   | UM   |
| AT1G09520 | UM  | UM   | UM  | UM   | UM  | UM   | UM   | UM   |
| AT1G09530 | UM  | UM   | UM  | UM   | UM  | UM   | UM   | UM   |
| AT1G09540 | UM  | UM   | UM  | UM   | UM  | UM   | UM   | UM   |
| AT1G09550 | UM  | UM   | UM  | UM   | UM  | UM   | UM   | UM   |
| AT1G09560 | UM  | UM   | UM  | UM   | UM  | UM   | UM   | UM   |
| AT1G09570 | gbM | gbM  | gbM | gbM  | gbM | gbM  | gbM  | gbM  |
| AT1G09575 | UM  | UM   | UM  | UM   | UM  | UM   | UM   | UM   |







|           |      |      |      |     |      |     |      |     |
|-----------|------|------|------|-----|------|-----|------|-----|
| AT1G10460 | UM   | UM   | UM   | UM  | UM   | UM  | UM   | UM  |
| AT1G10470 | UM   | UM   | UM   | UM  | UM   | UM  | UM   | UM  |
| AT1G10480 | UM   | UM   | UM   | UM  | UM   | UM  | UM   | UM  |
| AT1G10490 | gbM  | gbM  | gbM  | gbM | gbM  | gbM | gbM  | gbM |
| AT1G10500 | UM   | UM   | UM   | UM  | UM   | UM  | UM   | UM  |
| AT1G10510 | UM   | UM   | UM   | UM  | UM   | UM  | UM   | UM  |
| AT1G10520 | UM   | UM   | UM   | UM  | UM   | UM  | UM   | UM  |
| AT1G10522 | UM   | UM   | UM   | UM  | UM   | UM  | UM   | UM  |
| AT1G10530 | UM   | UM   | UM   | UM  | UM   | UM  | UM   | UM  |
| AT1G10540 | UM   | UM   | UM   | UM  | UM   | UM  | mCHH | UM  |
| AT1G10550 | UM   | UM   | UM   | UM  | UM   | UM  | UM   | UM  |
| AT1G10560 | UM   | UM   | UM   | UM  | UM   | UM  | UM   | UM  |
| AT1G10570 | UM   | UM   | UM   | UM  | UM   | UM  | UM   | UM  |
| AT1G10580 | UM   | UM   | UM   | UM  | UM   | UM  | UM   | UM  |
| AT1G10585 | UM   | UM   | UM   | UM  | UM   | UM  | UM   | UM  |
| AT1G10586 | UM   | UM   | UM   | UM  | UM   | UM  | UM   | UM  |
| AT1G10588 | UM   | UM   | UM   | UM  | UM   | UM  | UM   | UM  |
| AT1G10590 | UM   | UM   | UM   | UM  | UM   | UM  | UM   | UM  |
| AT1G10600 | UM   | UM   | UM   | UM  | UM   | UM  | UM   | UM  |
| AT1G10610 | UM   | UM   | UM   | UM  | UM   | UM  | UM   | UM  |
| AT1G10620 | UM   | UM   | UM   | UM  | UM   | UM  | mCHH | UM  |
| AT1G10630 | UM   | UM   | UM   | UM  | UM   | UM  | UM   | UM  |
| AT1G10640 | UM   | UM   | UM   | UM  | UM   | UM  | UM   | UM  |
| AT1G10650 | UM   | UM   | UM   | UM  | UM   | UM  | UM   | UM  |
| AT1G10652 | UM   | UM   | UM   | UM  | UM   | UM  | UM   | UM  |
| AT1G10657 | UM   | UM   | UM   | UM  | UM   | UM  | UM   | UM  |
| AT1G10660 | gbM  | mCHH | UM   | UM  | UM   | UM  | mCHH | UM  |
| AT1G10670 | UM   | UM   | UM   | UM  | UM   | UM  | UM   | UM  |
| AT1G10680 | UM   | UM   | UM   | UM  | UM   | UM  | UM   | UM  |
| AT1G10690 | UM   | UM   | UM   | UM  | UM   | UM  | UM   | UM  |
| AT1G10700 | UM   | UM   | UM   | UM  | UM   | UM  | UM   | UM  |
| AT1G10710 | UM   | UM   | UM   | UM  | UM   | UM  | UM   | UM  |
| AT1G10717 | UM   | UM   | UM   | UM  | UM   | UM  | UM   | UM  |
| AT1G10720 | UM   | UM   | UM   | UM  | UM   | UM  | UM   | UM  |
| AT1G10730 | UM   | UM   | UM   | UM  | UM   | UM  | UM   | UM  |
| AT1G10740 | UM   | UM   | UM   | UM  | UM   | UM  | UM   | UM  |
| AT1G10745 | mCHH | mCHH | mCHH | UM  | mCHH | UM  | mCHH | UM  |
| AT1G10747 | UM   | UM   | UM   | UM  | UM   | UM  | UM   | UM  |
| AT1G10750 | UM   | UM   | UM   | UM  | UM   | UM  | UM   | UM  |
| AT1G10760 | gbM  | gbM  | gbM  | gbM | UM   | UM  | mCHH | UM  |
| AT1G10770 | UM   | UM   | UM   | UM  | UM   | UM  | UM   | UM  |
| AT1G10780 | gbM  | gbM  | gbM  | UM  | UM   | UM  | gbM  | UM  |
| AT1G10790 | UM   | UM   | UM   | UM  | UM   | UM  | UM   | UM  |
| AT1G10800 | UM   | UM   | UM   | UM  | UM   | UM  | UM   | UM  |
| AT1G10810 | UM   | UM   | UM   | UM  | UM   | UM  | UM   | UM  |
| AT1G10820 | UM   | UM   | UM   | UM  | UM   | UM  | UM   | UM  |
| AT1G10830 | UM   | UM   | UM   | UM  | UM   | UM  | UM   | UM  |
| AT1G10840 | UM   | UM   | UM   | UM  | UM   | UM  | UM   | UM  |



|           |      |      |      |      |      |      |      |      |
|-----------|------|------|------|------|------|------|------|------|
| AT1G11340 | UM   |
| AT1G11350 | gbM  |
| AT1G11360 | UM   |
| AT1G11362 | UM   |
| AT1G11370 | UM   |
| AT1G11380 | UM   |
| AT1G11390 | gbM  |
| AT1G11400 | UM   |
| AT1G11410 | gbM  |
| AT1G11420 | UM   | UM   | UM   | UM   | UM   | UM   | mCHH | UM   |
| AT1G11430 | UM   |
| AT1G11440 | UM   |
| AT1G11450 | UM   |
| AT1G11460 | UM   |
| AT1G11470 | UM   |
| AT1G11475 | UM   |
| AT1G11480 | UM   |
| AT1G11490 | UM   |
| AT1G11500 | UM   |
| AT1G11510 | UM   |
| AT1G11520 | UM   |
| AT1G11530 | UM   |
| AT1G11540 | UM   |
| AT1G11545 | UM   |
| AT1G11560 | UM   |
| AT1G11570 | UM   |
| AT1G11572 | UM   |
| AT1G11580 | UM   |
| AT1G11590 | mCHH |
| AT1G11593 | mCHH |
| AT1G11600 | UM   |
| AT1G11608 | UM   |
| AT1G11610 | UM   |
| AT1G11620 | UM   |
| AT1G11630 | UM   |
| AT1G11650 | UM   |
| AT1G11655 | UM   |
| AT1G11660 | gbM  |
| AT1G11670 | UM   |
| AT1G11680 | gbM  | gbM  | gbM  | UM   | UM   | gbM  | gbM  | gbM  |
| AT1G11684 | UM   |
| AT1G11690 | UM   |
| AT1G11700 | UM   |
| AT1G11710 | UM   |
| AT1G11720 | gbM  | mCHH | mCHH | gbM  | gbM  | gbM  | mCHH | gbM  |
| AT1G11730 | UM   |
| AT1G11740 | UM   |
| AT1G11750 | UM   |

|           |      |      |      |      |      |     |      |      |
|-----------|------|------|------|------|------|-----|------|------|
| AT1G11755 | UM   | UM   | UM   | UM   | UM   | UM  | UM   | UM   |
| AT1G11760 | UM   | UM   | UM   | UM   | UM   | gbM | UM   | UM   |
| AT1G11765 | UM   | UM   | UM   | UM   | UM   | UM  | UM   | UM   |
| AT1G11770 | UM   | UM   | UM   | UM   | UM   | UM  | UM   | UM   |
| AT1G11780 | UM   | mCHH | UM   | UM   | UM   | UM  | UM   | UM   |
| AT1G11785 | mCHH | mCHG | mCHG | mCHH | mCHH | UM  | mCHH | mCHH |
| AT1G11790 | gbM  | gbM  | gbM  | gbM  | gbM  | gbM | mCHH | UM   |
| AT1G11800 | UM   | UM   | UM   | UM   | UM   | UM  | UM   | UM   |
| AT1G11810 | UM   | UM   | UM   | UM   | UM   | UM  | UM   | UM   |
| AT1G11820 | UM   | UM   | UM   | UM   | UM   | UM  | UM   | UM   |
| AT1G11840 | UM   | UM   | UM   | UM   | UM   | UM  | UM   | UM   |
| AT1G11850 | UM   | UM   | UM   | UM   | UM   | UM  | UM   | UM   |
| AT1G11860 | UM   | UM   | UM   | UM   | UM   | UM  | UM   | UM   |
| AT1G11870 | gbM  | gbM  | gbM  | gbM  | gbM  | gbM | gbM  | gbM  |
| AT1G11880 | UM   | UM   | UM   | UM   | UM   | UM  | UM   | UM   |
| AT1G11890 | UM   | UM   | UM   | UM   | UM   | UM  | UM   | UM   |
| AT1G11900 | UM   | UM   | UM   | UM   | UM   | UM  | UM   | UM   |
| AT1G11905 | UM   | UM   | UM   | UM   | UM   | UM  | UM   | UM   |
| AT1G11910 | UM   | UM   | UM   | UM   | UM   | UM  | UM   | UM   |
| AT1G11915 | UM   | UM   | UM   | UM   | UM   | UM  | UM   | UM   |
| AT1G11920 | UM   | UM   | UM   | UM   | UM   | UM  | UM   | UM   |
| AT1G11925 | UM   | UM   | UM   | UM   | UM   | UM  | UM   | UM   |
| AT1G11930 | UM   | UM   | UM   | UM   | UM   | UM  | UM   | UM   |
| AT1G11940 | UM   | UM   | UM   | UM   | UM   | UM  | UM   | UM   |
| AT1G11950 | gbM  | gbM  | gbM  | gbM  | gbM  | gbM | gbM  | gbM  |
| AT1G11960 | gbM  | gbM  | gbM  | UM   | UM   | UM  | mCHH | UM   |
| AT1G11970 | UM   | UM   | UM   | UM   | UM   | UM  | UM   | UM   |
| AT1G11980 | UM   | UM   | UM   | UM   | UM   | UM  | UM   | UM   |
| AT1G11990 | UM   | UM   | UM   | UM   | UM   | UM  | UM   | UM   |
| AT1G12000 | UM   | UM   | UM   | UM   | UM   | UM  | UM   | UM   |
| AT1G12010 | UM   | UM   | UM   | UM   | UM   | UM  | UM   | UM   |
| AT1G12020 | UM   | UM   | UM   | UM   | UM   | UM  | UM   | UM   |
| AT1G12030 | UM   | UM   | UM   | UM   | UM   | UM  | UM   | UM   |
| AT1G12040 | UM   | UM   | UM   | UM   | UM   | UM  | UM   | UM   |
| AT1G12050 | UM   | UM   | UM   | UM   | UM   | UM  | UM   | UM   |
| AT1G12060 | UM   | UM   | UM   | UM   | UM   | UM  | UM   | UM   |
| AT1G12064 | UM   | UM   | UM   | UM   | UM   | UM  | UM   | UM   |
| AT1G12070 | UM   | UM   | UM   | UM   | UM   | UM  | UM   | UM   |
| AT1G12080 | UM   | UM   | UM   | UM   | UM   | UM  | mCHH | UM   |
| AT1G12090 | UM   | UM   | UM   | UM   | UM   | UM  | UM   | UM   |
| AT1G12100 | UM   | UM   | UM   | UM   | UM   | UM  | UM   | UM   |
| AT1G12110 | UM   | UM   | UM   | UM   | UM   | UM  | UM   | UM   |
| AT1G12120 | gbM  | gbM  | gbM  | gbM  | gbM  | gbM | gbM  | gbM  |
| AT1G12130 | UM   | UM   | UM   | UM   | UM   | UM  | UM   | UM   |
| AT1G12140 | UM   | UM   | UM   | UM   | UM   | UM  | UM   | UM   |
| AT1G12150 | UM   | UM   | UM   | UM   | UM   | UM  | mCHH | UM   |
| AT1G12160 | UM   | UM   | UM   | UM   | UM   | UM  | UM   | UM   |
| AT1G12170 | UM   | UM   | UM   | UM   | UM   | UM  | UM   | UM   |

|           |     |      |     |     |     |     |      |     |
|-----------|-----|------|-----|-----|-----|-----|------|-----|
| AT1G12180 | UM  | UM   | UM  | UM  | UM  | UM  | UM   | UM  |
| AT1G12190 | UM  | UM   | UM  | UM  | UM  | UM  | UM   | UM  |
| AT1G12200 | UM  | UM   | UM  | UM  | UM  | UM  | UM   | UM  |
| AT1G12210 | UM  | UM   | UM  | UM  | UM  | UM  | UM   | UM  |
| AT1G12211 | UM  | UM   | UM  | UM  | UM  | UM  | UM   | UM  |
| AT1G12220 | UM  | UM   | UM  | UM  | UM  | UM  | UM   | UM  |
| AT1G12230 | UM  | UM   | UM  | UM  | UM  | UM  | gbM  | UM  |
| AT1G12240 | UM  | UM   | UM  | UM  | UM  | UM  | UM   | UM  |
| AT1G12244 | UM  | UM   | UM  | UM  | UM  | UM  | UM   | UM  |
| AT1G12250 | UM  | UM   | UM  | UM  | UM  | UM  | UM   | UM  |
| AT1G12260 | UM  | UM   | UM  | UM  | UM  | UM  | UM   | UM  |
| AT1G12270 | UM  | UM   | UM  | UM  | UM  | UM  | UM   | UM  |
| AT1G12280 | gbM | gbM  | UM  | gbM | gbM | gbM | mCHH | UM  |
| AT1G12290 | gbM | gbM  | gbM | gbM | gbM | gbM | gbM  | gbM |
| AT1G12300 | UM  | UM   | UM  | UM  | UM  | UM  | UM   | UM  |
| AT1G12310 | UM  | UM   | UM  | UM  | UM  | UM  | UM   | UM  |
| AT1G12320 | UM  | UM   | UM  | UM  | UM  | UM  | UM   | UM  |
| AT1G12330 | UM  | UM   | UM  | UM  | UM  | UM  | UM   | UM  |
| AT1G12340 | UM  | UM   | UM  | UM  | UM  | UM  | UM   | UM  |
| AT1G12350 | UM  | UM   | UM  | UM  | UM  | UM  | UM   | UM  |
| AT1G12360 | gbM | mCHH | gbM | gbM | gbM | gbM | gbM  | gbM |
| AT1G12370 | UM  | UM   | UM  | UM  | UM  | UM  | UM   | UM  |
| AT1G12380 | UM  | UM   | UM  | UM  | UM  | UM  | UM   | UM  |
| AT1G12390 | UM  | UM   | UM  | UM  | UM  | UM  | UM   | UM  |
| AT1G12400 | UM  | UM   | UM  | UM  | UM  | UM  | UM   | UM  |
| AT1G12410 | UM  | UM   | UM  | UM  | UM  | UM  | UM   | UM  |
| AT1G12411 | UM  | UM   | UM  | UM  | UM  | UM  | UM   | UM  |
| AT1G12420 | UM  | UM   | UM  | UM  | UM  | UM  | mCHH | UM  |
| AT1G12423 | UM  | UM   | UM  | UM  | UM  | UM  | UM   | UM  |
| AT1G12430 | UM  | UM   | UM  | UM  | UM  | UM  | mCHH | UM  |
| AT1G12440 | UM  | UM   | UM  | UM  | UM  | UM  | UM   | UM  |
| AT1G12450 | UM  | UM   | UM  | UM  | UM  | UM  | UM   | UM  |
| AT1G12451 | UM  | UM   | UM  | UM  | UM  | UM  | UM   | UM  |
| AT1G12460 | gbM | gbM  | gbM | gbM | gbM | gbM | mCHH | gbM |
| AT1G12470 | gbM | mCHH | gbM | gbM | gbM | gbM | mCHH | gbM |
| AT1G12480 | gbM | UM   | gbM | UM  | UM  | UM  | gbM  | UM  |
| AT1G12490 | UM  | UM   | UM  | UM  | UM  | UM  | UM   | UM  |
| AT1G12500 | UM  | UM   | UM  | UM  | UM  | UM  | UM   | UM  |
| AT1G12520 | UM  | UM   | UM  | UM  | UM  | UM  | UM   | UM  |
| AT1G12530 | UM  | UM   | UM  | UM  | UM  | UM  | UM   | UM  |
| AT1G12540 | UM  | UM   | UM  | UM  | UM  | UM  | UM   | UM  |
| AT1G12550 | UM  | UM   | UM  | UM  | UM  | UM  | UM   | UM  |
| AT1G12560 | UM  | UM   | UM  | UM  | UM  | UM  | UM   | UM  |
| AT1G12570 | UM  | UM   | UM  | UM  | UM  | UM  | UM   | UM  |
| AT1G12580 | gbM | gbM  | gbM | gbM | gbM | gbM | gbM  | gbM |
| AT1G12600 | UM  | UM   | UM  | UM  | UM  | UM  | UM   | UM  |
| AT1G12610 | UM  | UM   | UM  | UM  | UM  | UM  | UM   | UM  |
| AT1G12620 | gbM | gbM  | UM  | UM  | UM  | UM  | gbM  | UM  |

|           |     |     |     |     |     |     |      |     |
|-----------|-----|-----|-----|-----|-----|-----|------|-----|
| AT1G12630 | UM   | UM  |
| AT1G12640 | UM   | UM  |
| AT1G12650 | UM   | UM  |
| AT1G12660 | UM   | UM  |
| AT1G12663 | UM   | UM  |
| AT1G12665 | UM   | UM  |
| AT1G12672 | UM   | UM  |
| AT1G12680 | UM   | UM  |
| AT1G12700 | UM  | UM  | UM  | UM  | UM  | UM  | mCHH | UM  |
| AT1G12710 | UM   | UM  |
| AT1G12730 | UM   | UM  |
| AT1G12740 | UM   | UM  |
| AT1G12750 | UM   | UM  |
| AT1G12760 | UM   | UM  |
| AT1G12770 | gbM | gbM | gbM | gbM | gbM | gbM | mCHH | gbM |
| AT1G12775 | UM   | UM  |
| AT1G12780 | UM   | UM  |
| AT1G12790 | UM   | UM  |
| AT1G12800 | gbM | UM  | UM  | UM  | UM  | UM  | UM   | UM  |
| AT1G12805 | UM   | UM  |
| AT1G12810 | UM   | UM  |
| AT1G12820 | gbM | gbM | gbM | UM  | gbM | gbM | gbM  | gbM |
| AT1G12830 | UM   | UM  |
| AT1G12840 | UM   | UM  |
| AT1G12845 | UM   | UM  |
| AT1G12850 | UM   | UM  |
| AT1G12855 | UM   | UM  |
| AT1G12860 | UM   | UM  |
| AT1G12870 | UM   | UM  |
| AT1G12880 | UM   | UM  |
| AT1G12890 | UM   | UM  |
| AT1G12900 | UM   | UM  |
| AT1G12910 | UM   | UM  |
| AT1G12920 | UM   | UM  |
| AT1G12930 | UM  | UM  | gbM | UM  | UM  | UM  | mCHH | UM  |
| AT1G12938 | UM   | UM  |
| AT1G12940 | UM   | UM  |
| AT1G12950 | UM   | UM  |
| AT1G12960 | UM   | UM  |
| AT1G12970 | UM   | UM  |
| AT1G12980 | UM   | UM  |
| AT1G12990 | UM   | UM  |
| AT1G13000 | gbM  | gbM |
| AT1G13020 | UM   | UM  |
| AT1G13030 | UM   | UM  |
| AT1G13040 | UM  | gbM | UM  | UM  | UM  | UM  | gbM  | UM  |
| AT1G13050 | gbM  | UM  |
| AT1G13060 | gbM | gbM | gbM | gbM | gbM | UM  | gbM  | gbM |











|           |      |     |     |     |     |     |      |     |
|-----------|------|-----|-----|-----|-----|-----|------|-----|
| AT1G14840 | gbM  | gbM | UM  | gbM | UM  | UM  | UM   | UM  |
| AT1G14850 | gbM  | gbM | gbM | gbM | gbM | gbM | mCHH | gbM |
| AT1G14860 | UM   | UM  | UM  | UM  | UM  | UM  | UM   | UM  |
| AT1G14870 | UM   | UM  | UM  | UM  | UM  | UM  | UM   | UM  |
| AT1G14880 | UM   | UM  | UM  | UM  | UM  | UM  | UM   | UM  |
| AT1G14890 | UM   | UM  | UM  | UM  | UM  | UM  | UM   | UM  |
| AT1G14900 | UM   | UM  | UM  | UM  | UM  | UM  | UM   | UM  |
| AT1G14910 | UM   | UM  | UM  | UM  | UM  | UM  | UM   | UM  |
| AT1G14920 | UM   | UM  | UM  | UM  | UM  | UM  | UM   | UM  |
| AT1G14930 | UM   | UM  | UM  | UM  | UM  | UM  | UM   | UM  |
| AT1G14940 | UM   | UM  | UM  | UM  | UM  | UM  | UM   | UM  |
| AT1G14950 | UM   | UM  | UM  | UM  | UM  | UM  | UM   | UM  |
| AT1G14960 | UM   | UM  | UM  | UM  | UM  | UM  | UM   | UM  |
| AT1G14970 | UM   | UM  | UM  | UM  | UM  | UM  | UM   | UM  |
| AT1G14980 | UM   | UM  | UM  | UM  | UM  | UM  | UM   | UM  |
| AT1G14990 | UM   | UM  | UM  | UM  | UM  | UM  | UM   | UM  |
| AT1G15000 | UM   | UM  | UM  | UM  | UM  | UM  | UM   | UM  |
| AT1G15010 | UM   | UM  | UM  | UM  | UM  | UM  | UM   | UM  |
| AT1G15015 | UM   | UM  | UM  | UM  | UM  | UM  | UM   | UM  |
| AT1G15020 | gbM  | UM  | UM  | UM  | UM  | UM  | UM   | UM  |
| AT1G15030 | UM   | UM  | UM  | UM  | UM  | UM  | UM   | UM  |
| AT1G15040 | UM   | UM  | UM  | UM  | UM  | UM  | UM   | UM  |
| AT1G15045 | UM   | UM  | UM  | UM  | UM  | UM  | UM   | UM  |
| AT1G15050 | UM   | UM  | UM  | UM  | UM  | UM  | UM   | UM  |
| AT1G15060 | gbM  | gbM | gbM | gbM | gbM | gbM | gbM  | gbM |
| AT1G15080 | UM   | UM  | UM  | UM  | UM  | UM  | UM   | UM  |
| AT1G15100 | UM   | UM  | UM  | UM  | UM  | UM  | UM   | UM  |
| AT1G15110 | UM   | UM  | UM  | UM  | UM  | UM  | UM   | UM  |
| AT1G15120 | UM   | UM  | UM  | UM  | UM  | UM  | UM   | UM  |
| AT1G15125 | UM   | UM  | UM  | UM  | UM  | UM  | UM   | UM  |
| AT1G15130 | UM   | UM  | UM  | UM  | UM  | UM  | UM   | UM  |
| AT1G15140 | UM   | UM  | UM  | UM  | UM  | UM  | UM   | UM  |
| AT1G15150 | UM   | UM  | UM  | UM  | UM  | UM  | UM   | UM  |
| AT1G15160 | UM   | UM  | UM  | UM  | UM  | UM  | UM   | UM  |
| AT1G15165 | UM   | UM  | UM  | UM  | UM  | UM  | UM   | UM  |
| AT1G15170 | UM   | UM  | UM  | UM  | UM  | UM  | UM   | UM  |
| AT1G15180 | UM   | UM  | UM  | UM  | UM  | UM  | UM   | UM  |
| AT1G15190 | UM   | UM  | UM  | UM  | UM  | UM  | UM   | UM  |
| AT1G15200 | UM   | UM  | UM  | UM  | UM  | UM  | UM   | UM  |
| AT1G15210 | UM   | UM  | UM  | UM  | UM  | UM  | UM   | UM  |
| AT1G15215 | gbM  | gbM | gbM | UM  | UM  | UM  | mCHG | UM  |
| AT1G15220 | UM   | UM  | UM  | UM  | UM  | UM  | UM   | UM  |
| AT1G15230 | UM   | UM  | UM  | UM  | UM  | UM  | UM   | UM  |
| AT1G15240 | gbM  | gbM | gbM | gbM | gbM | gbM | mCHH | gbM |
| AT1G15250 | mCHH | UM  | UM  | UM  | UM  | UM  | UM   | UM  |
| AT1G15260 | UM   | UM  | UM  | UM  | UM  | UM  | UM   | UM  |
| AT1G15270 | UM   | UM  | UM  | UM  | UM  | UM  | UM   | UM  |
| AT1G15280 | gbM  | gbM | gbM | gbM | gbM | gbM | gbM  | gbM |

|           |      |     |      |     |     |     |      |     |
|-----------|------|-----|------|-----|-----|-----|------|-----|
| AT1G15290 | UM   | UM  | UM   | UM  | UM  | UM  | UM   | UM  |
| AT1G15310 | UM   | UM  | UM   | UM  | UM  | UM  | UM   | UM  |
| AT1G15320 | UM   | UM  | UM   | UM  | UM  | UM  | UM   | UM  |
| AT1G15330 | UM   | UM  | UM   | UM  | UM  | UM  | UM   | UM  |
| AT1G15340 | mCHG | UM  | mCHG | UM  | UM  | UM  | mCHH | UM  |
| AT1G15350 | UM   | UM  | UM   | UM  | UM  | UM  | UM   | UM  |
| AT1G15360 | UM   | UM  | UM   | UM  | UM  | UM  | UM   | UM  |
| AT1G15370 | UM   | UM  | UM   | UM  | UM  | UM  | UM   | UM  |
| AT1G15380 | UM   | UM  | UM   | UM  | UM  | UM  | UM   | UM  |
| AT1G15385 | UM   | UM  | UM   | UM  | UM  | UM  | UM   | UM  |
| AT1G15390 | UM   | UM  | UM   | UM  | UM  | UM  | UM   | UM  |
| AT1G15400 | UM   | UM  | UM   | UM  | UM  | UM  | UM   | UM  |
| AT1G15410 | UM   | UM  | UM   | UM  | UM  | UM  | UM   | UM  |
| AT1G15415 | UM   | UM  | UM   | UM  | UM  | UM  | UM   | UM  |
| AT1G15420 | UM   | UM  | UM   | UM  | UM  | UM  | UM   | UM  |
| AT1G15430 | gbM  | gbM | gbM  | gbM | UM  | gbM | gbM  | UM  |
| AT1G15440 | gbM  | gbM | gbM  | gbM | gbM | gbM | gbM  | gbM |
| AT1G15460 | UM   | UM  | UM   | UM  | UM  | UM  | mCHH | UM  |
| AT1G15470 | UM   | UM  | UM   | UM  | UM  | UM  | UM   | UM  |
| AT1G15480 | gbM  | UM  | UM   | gbM | UM  | UM  | UM   | UM  |
| AT1G15490 | UM   | UM  | UM   | UM  | UM  | UM  | UM   | UM  |
| AT1G15500 | UM   | UM  | UM   | UM  | UM  | UM  | mCHH | UM  |
| AT1G15510 | UM   | UM  | UM   | UM  | UM  | UM  | UM   | UM  |
| AT1G15520 | UM   | UM  | UM   | UM  | UM  | UM  | mCHH | UM  |
| AT1G15530 | UM   | UM  | UM   | UM  | UM  | UM  | UM   | UM  |
| AT1G15540 | UM   | UM  | UM   | UM  | UM  | UM  | UM   | UM  |
| AT1G15550 | UM   | UM  | UM   | UM  | UM  | UM  | UM   | UM  |
| AT1G15570 | UM   | UM  | UM   | UM  | UM  | UM  | UM   | UM  |
| AT1G15580 | UM   | UM  | UM   | UM  | UM  | UM  | UM   | UM  |
| AT1G15590 | UM   | UM  | UM   | UM  | UM  | UM  | UM   | UM  |
| AT1G15600 | UM   | UM  | UM   | UM  | UM  | UM  | UM   | UM  |
| AT1G15610 | UM   | UM  | UM   | UM  | UM  | UM  | UM   | UM  |
| AT1G15620 | UM   | UM  | UM   | UM  | UM  | UM  | UM   | UM  |
| AT1G15630 | UM   | UM  | UM   | UM  | UM  | UM  | UM   | UM  |
| AT1G15640 | UM   | UM  | UM   | UM  | UM  | UM  | UM   | UM  |
| AT1G15660 | UM   | gbM | UM   | UM  | UM  | UM  | mCHH | UM  |
| AT1G15670 | UM   | UM  | UM   | UM  | UM  | UM  | UM   | UM  |
| AT1G15680 | UM   | UM  | UM   | UM  | UM  | UM  | UM   | UM  |
| AT1G15690 | UM   | UM  | UM   | UM  | UM  | UM  | UM   | UM  |
| AT1G15700 | UM   | UM  | UM   | UM  | UM  | UM  | UM   | UM  |
| AT1G15710 | UM   | UM  | UM   | UM  | UM  | UM  | UM   | UM  |
| AT1G15720 | UM   | UM  | UM   | UM  | UM  | UM  | UM   | UM  |
| AT1G15730 | UM   | UM  | UM   | UM  | UM  | UM  | UM   | UM  |
| AT1G15740 | UM   | UM  | UM   | UM  | UM  | UM  | UM   | UM  |
| AT1G15750 | gbM  | gbM | gbM  | gbM | gbM | gbM | mCHH | gbM |
| AT1G15757 | UM   | UM  | UM   | UM  | UM  | UM  | UM   | UM  |
| AT1G15760 | UM   | UM  | UM   | UM  | UM  | UM  | UM   | UM  |
| AT1G15770 | UM   | UM  | UM   | UM  | UM  | UM  | UM   | UM  |

|           |      |      |      |     |     |     |      |     |
|-----------|------|------|------|-----|-----|-----|------|-----|
| AT1G15772 | UM   | UM   | UM   | UM  | UM  | UM  | UM   | UM  |
| AT1G15780 | gbM  | gbM  | gbM  | gbM | gbM | gbM | gbM  | gbM |
| AT1G15790 | UM   | UM   | UM   | UM  | UM  | UM  | UM   | UM  |
| AT1G15800 | UM   | UM   | UM   | UM  | UM  | UM  | UM   | UM  |
| AT1G15810 | UM   | UM   | UM   | UM  | UM  | UM  | UM   | UM  |
| AT1G15820 | UM   | UM   | UM   | UM  | UM  | UM  | UM   | UM  |
| AT1G15825 | UM   | UM   | UM   | UM  | UM  | UM  | UM   | UM  |
| AT1G15830 | UM   | UM   | UM   | UM  | UM  | UM  | UM   | UM  |
| AT1G15840 | UM   | UM   | UM   | UM  | UM  | UM  | UM   | UM  |
| AT1G15850 | UM   | UM   | UM   | UM  | UM  | UM  | UM   | UM  |
| AT1G15860 | UM   | UM   | UM   | UM  | UM  | UM  | UM   | UM  |
| AT1G15870 | UM   | UM   | UM   | UM  | UM  | UM  | UM   | UM  |
| AT1G15880 | UM   | UM   | UM   | UM  | UM  | UM  | UM   | UM  |
| AT1G15885 | UM   | UM   | UM   | UM  | UM  | UM  | UM   | UM  |
| AT1G15890 | UM   | mCHH | UM   | UM  | UM  | UM  | UM   | UM  |
| AT1G15900 | UM   | UM   | UM   | UM  | UM  | UM  | UM   | UM  |
| AT1G15910 | UM   | mCHH | UM   | UM  | UM  | UM  | UM   | UM  |
| AT1G15920 | UM   | UM   | UM   | UM  | UM  | UM  | UM   | UM  |
| AT1G15930 | UM   | UM   | UM   | UM  | UM  | UM  | UM   | UM  |
| AT1G15940 | mCHH | mCHH | mCHH | gbM | gbM | gbM | mCHH | UM  |
| AT1G15950 | UM   | UM   | UM   | UM  | UM  | UM  | UM   | UM  |
| AT1G15960 | UM   | UM   | UM   | UM  | UM  | UM  | UM   | UM  |
| AT1G15970 | UM   | UM   | UM   | UM  | UM  | UM  | UM   | UM  |
| AT1G15980 | UM   | UM   | UM   | UM  | UM  | UM  | UM   | UM  |
| AT1G15990 | UM   | UM   | UM   | UM  | UM  | UM  | UM   | UM  |
| AT1G16000 | UM   | UM   | UM   | UM  | UM  | UM  | UM   | UM  |
| AT1G16010 | UM   | UM   | UM   | UM  | UM  | UM  | UM   | UM  |
| AT1G16020 | UM   | UM   | UM   | UM  | UM  | UM  | UM   | UM  |
| AT1G16022 | UM   | UM   | UM   | UM  | UM  | UM  | UM   | UM  |
| AT1G16025 | UM   | UM   | UM   | UM  | UM  | UM  | UM   | UM  |
| AT1G16030 | UM   | UM   | UM   | UM  | UM  | UM  | UM   | UM  |
| AT1G16040 | UM   | UM   | UM   | UM  | UM  | UM  | UM   | UM  |
| AT1G16060 | UM   | UM   | UM   | UM  | UM  | UM  | UM   | UM  |
| AT1G16070 | UM   | UM   | UM   | UM  | UM  | UM  | UM   | UM  |
| AT1G16080 | UM   | UM   | UM   | UM  | UM  | UM  | UM   | UM  |
| AT1G16090 | gbM  | gbM  | gbM  | gbM | gbM | gbM | gbM  | gbM |
| AT1G16110 | UM   | UM   | UM   | UM  | UM  | UM  | UM   | UM  |
| AT1G16120 | UM   | UM   | UM   | UM  | UM  | UM  | UM   | UM  |
| AT1G16130 | UM   | UM   | UM   | UM  | UM  | UM  | UM   | UM  |
| AT1G16150 | UM   | UM   | UM   | UM  | UM  | UM  | UM   | UM  |
| AT1G16160 | UM   | UM   | UM   | UM  | UM  | UM  | UM   | UM  |
| AT1G16170 | UM   | UM   | UM   | UM  | UM  | UM  | UM   | UM  |
| AT1G16180 | UM   | UM   | UM   | UM  | UM  | UM  | UM   | UM  |
| AT1G16190 | gbM  | gbM  | UM   | UM  | gbM | gbM | gbM  | UM  |
| AT1G16210 | UM   | UM   | UM   | UM  | UM  | UM  | UM   | UM  |
| AT1G16220 | UM   | UM   | UM   | UM  | UM  | UM  | UM   | UM  |
| AT1G16225 | UM   | UM   | UM   | UM  | UM  | UM  | UM   | UM  |
| AT1G16230 | UM   | UM   | UM   | UM  | UM  | UM  | UM   | UM  |











|           |      |      |     |     |     |     |      |     |
|-----------|------|------|-----|-----|-----|-----|------|-----|
| AT1G18140 | UM   | UM   | UM  | UM  | UM  | UM  | UM   | UM  |
| AT1G18150 | UM   | UM   | UM  | UM  | UM  | UM  | UM   | UM  |
| AT1G18160 | gbM  | gbM  | gbM | gbM | gbM | gbM | gbM  | gbM |
| AT1G18170 | UM   | UM   | UM  | UM  | UM  | UM  | UM   | UM  |
| AT1G18180 | UM   | UM   | UM  | UM  | UM  | UM  | UM   | UM  |
| AT1G18190 | UM   | mCHH | UM  | UM  | UM  | UM  | mCHH | UM  |
| AT1G18200 | UM   | UM   | UM  | UM  | UM  | UM  | UM   | UM  |
| AT1G18210 | UM   | UM   | UM  | UM  | UM  | UM  | UM   | UM  |
| AT1G18220 | UM   | UM   | UM  | UM  | UM  | UM  | UM   | UM  |
| AT1G18250 | UM   | UM   | UM  | UM  | UM  | UM  | UM   | UM  |
| AT1G18260 | UM   | UM   | UM  | UM  | UM  | UM  | UM   | UM  |
| AT1G18265 | UM   | UM   | UM  | UM  | UM  | UM  | UM   | UM  |
| AT1G18270 | gbM  | gbM  | gbM | gbM | UM  | UM  | gbM  | gbM |
| AT1G18280 | UM   | UM   | UM  | UM  | UM  | UM  | UM   | UM  |
| AT1G18290 | UM   | UM   | UM  | UM  | UM  | UM  | UM   | UM  |
| AT1G18300 | UM   | UM   | UM  | UM  | UM  | UM  | UM   | UM  |
| AT1G18310 | mCHG | mCHG | UM  | UM  | UM  | UM  | mCHG | UM  |
| AT1G18320 | UM   | UM   | UM  | UM  | UM  | UM  | UM   | UM  |
| AT1G18330 | UM   | UM   | UM  | UM  | UM  | UM  | UM   | UM  |
| AT1G18335 | UM   | UM   | UM  | UM  | UM  | UM  | UM   | UM  |
| AT1G18340 | UM   | UM   | UM  | UM  | UM  | UM  | UM   | UM  |
| AT1G18350 | UM   | UM   | UM  | UM  | UM  | UM  | UM   | UM  |
| AT1G18360 | UM   | UM   | UM  | UM  | UM  | UM  | UM   | UM  |
| AT1G18370 | UM   | UM   | UM  | UM  | UM  | UM  | mCHH | UM  |
| AT1G18390 | UM   | UM   | UM  | UM  | UM  | UM  | UM   | UM  |
| AT1G18400 | UM   | UM   | UM  | UM  | UM  | UM  | UM   | UM  |
| AT1G18410 | UM   | mCHH | UM  | UM  | UM  | UM  | mCHH | UM  |
| AT1G18420 | UM   | UM   | UM  | UM  | UM  | UM  | UM   | UM  |
| AT1G18440 | UM   | UM   | UM  | UM  | UM  | UM  | UM   | UM  |
| AT1G18450 | UM   | UM   | UM  | UM  | UM  | UM  | UM   | UM  |
| AT1G18460 | gbM  | gbM  | gbM | gbM | gbM | gbM | gbM  | gbM |
| AT1G18470 | gbM  | gbM  | gbM | UM  | gbM | gbM | mCHH | gbM |
| AT1G18480 | UM   | UM   | UM  | UM  | UM  | UM  | UM   | UM  |
| AT1G18485 | UM   | UM   | UM  | UM  | UM  | UM  | mCHH | UM  |
| AT1G18486 | UM   | UM   | UM  | UM  | UM  | UM  | UM   | UM  |
| AT1G18490 | UM   | UM   | UM  | UM  | UM  | UM  | UM   | UM  |
| AT1G18500 | UM   | UM   | UM  | UM  | UM  | UM  | UM   | UM  |
| AT1G18510 | UM   | UM   | UM  | UM  | UM  | UM  | UM   | UM  |
| AT1G18520 | UM   | UM   | UM  | UM  | UM  | UM  | UM   | UM  |
| AT1G18530 | UM   | UM   | UM  | UM  | UM  | UM  | UM   | UM  |
| AT1G18540 | UM   | UM   | UM  | UM  | UM  | UM  | UM   | UM  |
| AT1G18550 | UM   | UM   | UM  | UM  | UM  | UM  | mCHH | UM  |
| AT1G18560 | UM   | UM   | UM  | UM  | UM  | UM  | UM   | UM  |
| AT1G18570 | UM   | UM   | UM  | UM  | UM  | UM  | UM   | UM  |
| AT1G18580 | gbM  | gbM  | UM  | UM  | UM  | UM  | gbM  | UM  |
| AT1G18590 | UM   | UM   | UM  | UM  | UM  | UM  | UM   | UM  |
| AT1G18600 | UM   | UM   | UM  | UM  | UM  | UM  | UM   | UM  |
| AT1G18610 | gbM  | gbM  | gbM | gbM | gbM | gbM | gbM  | UM  |



|           |      |      |      |      |      |      |      |      |
|-----------|------|------|------|------|------|------|------|------|
| AT1G19090 | mCHH |
| AT1G19100 | gbM  |
| AT1G19110 | UM   |
| AT1G19115 | UM   |
| AT1G19120 | UM   |
| AT1G19130 | UM   |
| AT1G19140 | UM   |
| AT1G19150 | UM   |
| AT1G19160 | UM   |
| AT1G19170 | UM   |
| AT1G19180 | UM   |
| AT1G19190 | UM   |
| AT1G19200 | UM   |
| AT1G19210 | UM   |
| AT1G19220 | gbM  | gbM  | gbM  | gbM  | gbM  | gbM  | mCHH | gbM  |
| AT1G19230 | UM   | UM   | UM   | UM   | UM   | UM   | mCHH | UM   |
| AT1G19240 | UM   |
| AT1G19250 | UM   |
| AT1G19260 | mCHH |
| AT1G19270 | UM   |
| AT1G19290 | UM   | gbM  | UM   | UM   | UM   | UM   | gbM  | UM   |
| AT1G19300 | UM   |
| AT1G19310 | UM   |
| AT1G19320 | UM   |
| AT1G19330 | UM   |
| AT1G19340 | UM   |
| AT1G19350 | UM   |
| AT1G19360 | UM   |
| AT1G19370 | gbM  | gbM  | gbM  | gbM  | UM   | gbM  | gbM  | gbM  |
| AT1G19380 | UM   |
| AT1G19390 | UM   |
| AT1G19394 | UM   |
| AT1G19396 | UM   |
| AT1G19397 | UM   |
| AT1G19400 | UM   |
| AT1G19410 | mCHH | mCHH | mCHH | UM   | UM   | UM   | mCHH | UM   |
| AT1G19430 | UM   | UM   | UM   | UM   | UM   | UM   | mCHH | UM   |
| AT1G19440 | gbM  |
| AT1G19450 | UM   |
| AT1G19460 | UM   |
| AT1G19470 | UM   |
| AT1G19480 | UM   |
| AT1G19485 | UM   | mCHH | UM   | UM   | UM   | UM   | gbM  | UM   |
| AT1G19490 | UM   |
| AT1G19500 | UM   |
| AT1G19510 | UM   |
| AT1G19520 | UM   | UM   | UM   | UM   | UM   | UM   | mCHH | UM   |
| AT1G19530 | UM   |

|           |     |      |     |     |     |     |      |     |
|-----------|-----|------|-----|-----|-----|-----|------|-----|
| AT1G19540 | UM  | UM   | UM  | UM  | UM  | UM  | UM   | UM  |
| AT1G19550 | UM  | UM   | UM  | UM  | UM  | UM  | UM   | UM  |
| AT1G19570 | UM  | UM   | UM  | UM  | UM  | UM  | UM   | UM  |
| AT1G19580 | gbM | gbM  | gbM | UM  | UM  | UM  | gbM  | UM  |
| AT1G19600 | UM  | UM   | UM  | UM  | UM  | UM  | UM   | UM  |
| AT1G19610 | UM  | UM   | UM  | UM  | UM  | UM  | UM   | UM  |
| AT1G19620 | UM  | UM   | UM  | UM  | UM  | UM  | UM   | UM  |
| AT1G19630 | UM  | UM   | UM  | UM  | UM  | UM  | UM   | UM  |
| AT1G19640 | UM  | UM   | UM  | UM  | UM  | UM  | UM   | UM  |
| AT1G19650 | UM  | UM   | UM  | UM  | UM  | UM  | UM   | UM  |
| AT1G19660 | UM  | UM   | UM  | UM  | UM  | UM  | UM   | UM  |
| AT1G19670 | UM  | UM   | UM  | UM  | UM  | UM  | UM   | UM  |
| AT1G19680 | UM  | UM   | UM  | UM  | UM  | UM  | UM   | UM  |
| AT1G19690 | UM  | UM   | UM  | UM  | UM  | UM  | UM   | UM  |
| AT1G19700 | UM  | UM   | UM  | UM  | UM  | UM  | UM   | UM  |
| AT1G19710 | UM  | UM   | UM  | UM  | UM  | UM  | UM   | UM  |
| AT1G19715 | gbM | mCHH | gbM | gbM | gbM | gbM | gbM  | gbM |
| AT1G19720 | gbM | gbM  | gbM | gbM | UM  | UM  | gbM  | UM  |
| AT1G19730 | UM  | UM   | UM  | UM  | UM  | UM  | UM   | UM  |
| AT1G19740 | UM  | UM   | UM  | UM  | UM  | UM  | UM   | UM  |
| AT1G19750 | UM  | UM   | UM  | UM  | UM  | UM  | UM   | UM  |
| AT1G19770 | UM  | UM   | UM  | UM  | UM  | UM  | UM   | UM  |
| AT1G19780 | UM  | UM   | UM  | UM  | UM  | UM  | UM   | UM  |
| AT1G19790 | UM  | UM   | UM  | UM  | UM  | UM  | UM   | UM  |
| AT1G19800 | UM  | UM   | UM  | UM  | UM  | UM  | UM   | UM  |
| AT1G19830 | UM  | UM   | UM  | UM  | UM  | UM  | UM   | UM  |
| AT1G19835 | UM  | UM   | UM  | UM  | UM  | UM  | mCHH | UM  |
| AT1G19840 | UM  | UM   | UM  | UM  | UM  | UM  | UM   | UM  |
| AT1G19850 | gbM | gbM  | gbM | gbM | gbM | gbM | gbM  | gbM |
| AT1G19860 | gbM | gbM  | gbM | gbM | gbM | gbM | gbM  | gbM |
| AT1G19870 | gbM | gbM  | gbM | gbM | gbM | gbM | mCHH | UM  |
| AT1G19880 | UM  | gbM  | UM  | UM  | UM  | UM  | UM   | UM  |
| AT1G19890 | UM  | UM   | UM  | UM  | UM  | UM  | UM   | UM  |
| AT1G19900 | UM  | UM   | UM  | UM  | UM  | UM  | UM   | UM  |
| AT1G19910 | UM  | UM   | UM  | UM  | UM  | UM  | UM   | UM  |
| AT1G19920 | UM  | UM   | UM  | UM  | UM  | UM  | UM   | UM  |
| AT1G19930 | UM  | UM   | UM  | UM  | UM  | UM  | UM   | UM  |
| AT1G19940 | UM  | UM   | UM  | UM  | UM  | UM  | UM   | UM  |
| AT1G19950 | UM  | UM   | UM  | UM  | UM  | UM  | UM   | UM  |
| AT1G19960 | UM  | UM   | UM  | UM  | UM  | UM  | UM   | UM  |
| AT1G19970 | UM  | UM   | UM  | UM  | UM  | UM  | UM   | UM  |
| AT1G19980 | UM  | UM   | UM  | UM  | UM  | UM  | mCHH | UM  |
| AT1G19990 | UM  | UM   | UM  | UM  | UM  | UM  | mCHH | UM  |
| AT1G20000 | UM  | UM   | UM  | UM  | UM  | UM  | UM   | UM  |
| AT1G20010 | UM  | UM   | UM  | UM  | UM  | UM  | UM   | UM  |
| AT1G20020 | UM  | UM   | UM  | UM  | UM  | UM  | UM   | UM  |
| AT1G20030 | UM  | UM   | UM  | UM  | UM  | UM  | UM   | UM  |
| AT1G20050 | UM  | UM   | UM  | UM  | UM  | UM  | UM   | UM  |

|           |      |      |      |      |      |      |      |      |
|-----------|------|------|------|------|------|------|------|------|
| AT1G20060 | UM   | mCHH | UM   | UM   | UM   | UM   | mCHH | UM   |
| AT1G20065 | UM   |
| AT1G20070 | UM   |
| AT1G20080 | UM   |
| AT1G20090 | UM   |
| AT1G20100 | UM   |
| AT1G20110 | UM   |
| AT1G20120 | UM   |
| AT1G20130 | UM   |
| AT1G20132 | UM   |
| AT1G20135 | UM   |
| AT1G20140 | UM   |
| AT1G20150 | UM   |
| AT1G20160 | UM   |
| AT1G20180 | UM   | UM   | UM   | UM   | UM   | UM   | mCHH | UM   |
| AT1G20190 | UM   |
| AT1G20200 | gbM  | gbM  | gbM  | gbM  | gbM  | UM   | gbM  | gbM  |
| AT1G20220 | UM   |
| AT1G20225 | UM   |
| AT1G20230 | UM   |
| AT1G20240 | UM   |
| AT1G20260 | UM   |
| AT1G20270 | UM   |
| AT1G20280 | mCHH | mCHG |
| AT1G20290 | UM   |
| AT1G20300 | UM   |
| AT1G20310 | UM   |
| AT1G20320 | UM   |
| AT1G20330 | UM   |
| AT1G20340 | UM   |
| AT1G20350 | UM   |
| AT1G20360 | UM   |
| AT1G20370 | UM   |
| AT1G20380 | UM   | gbM  | UM   | UM   | UM   | UM   | gbM  | UM   |
| AT1G20400 | mCHH |
| AT1G20405 | UM   |
| AT1G20410 | UM   |
| AT1G20430 | UM   |
| AT1G20440 | UM   | UM   | UM   | UM   | UM   | UM   | mCHH | UM   |
| AT1G20450 | mCHH | mCHH | UM   | UM   | UM   | UM   | mCHH | UM   |
| AT1G20460 | UM   |
| AT1G20470 | UM   | UM   | gbM  | UM   | UM   | UM   | UM   | UM   |
| AT1G20480 | UM   |
| AT1G20490 | UM   |
| AT1G20500 | UM   |
| AT1G20510 | UM   |
| AT1G20520 | UM   |
| AT1G20530 | UM   | UM   | UM   | UM   | UM   | UM   | mCHH | UM   |







|           |      |      |      |      |      |      |      |      |
|-----------|------|------|------|------|------|------|------|------|
| AT1G21450 | gbM  | mCHH | gbM  | gbM  | gbM  | gbM  | gbM  | gbM  |
| AT1G21460 | UM   |
| AT1G21470 | UM   |
| AT1G21475 | UM   |
| AT1G21480 | UM   |
| AT1G21500 | UM   |
| AT1G21510 | UM   |
| AT1G21520 | UM   |
| AT1G21528 | UM   |
| AT1G21530 | UM   |
| AT1G21540 | UM   |
| AT1G21550 | UM   |
| AT1G21560 | UM   |
| AT1G21580 | gbM  | gbM  | gbM  | gbM  | gbM  | gbM  | mCHH | gbM  |
| AT1G21590 | gbM  | gbM  | gbM  | gbM  | UM   | UM   | mCHH | UM   |
| AT1G21600 | UM   |
| AT1G21610 | UM   |
| AT1G21620 | UM   |
| AT1G21630 | gbM  |
| AT1G21640 | gbM  | gbM  | gbM  | gbM  | gbM  | gbM  | mCHH | gbM  |
| AT1G21650 | gbM  | gbM  | gbM  | gbM  | gbM  | UM   | gbM  | gbM  |
| AT1G21651 | UM   |
| AT1G21660 | gbM  | gbM  | gbM  | gbM  | UM   | gbM  | gbM  | UM   |
| AT1G21670 | UM   |
| AT1G21680 | UM   |
| AT1G21690 | UM   |
| AT1G21695 | UM   |
| AT1G21700 | gbM  |
| AT1G21710 | UM   |
| AT1G21720 | UM   |
| AT1G21722 | UM   |
| AT1G21730 | gbM  | gbM  | gbM  | gbM  | UM   | UM   | mCHH | UM   |
| AT1G21738 | UM   |
| AT1G21740 | UM   | UM   | UM   | UM   | UM   | UM   | gbM  | UM   |
| AT1G21750 | UM   |
| AT1G21760 | UM   |
| AT1G21770 | UM   |
| AT1G21780 | UM   | UM   | UM   | UM   | UM   | UM   | gbM  | UM   |
| AT1G21790 | UM   |
| AT1G21810 | UM   | UM   | UM   | UM   | UM   | UM   | mCHH | UM   |
| AT1G21830 | UM   |
| AT1G21835 | mCHH |
| AT1G21840 | UM   |
| AT1G21850 | UM   |
| AT1G21860 | UM   |
| AT1G21864 | UM   |
| AT1G21866 | UM   |
| AT1G21870 | UM   |

|           |      |      |      |      |      |      |      |      |
|-----------|------|------|------|------|------|------|------|------|
| AT1G21880 | UM   |
| AT1G21890 | UM   |
| AT1G21900 | UM   |
| AT1G21910 | UM   |
| AT1G21920 | UM   |
| AT1G21925 | mCHH | mCHH | mCHH | mCHH | mCHG | mCHH | mCHH | mCHH |
| AT1G21928 | mCHH |
| AT1G21930 | gbM  | gbM  | UM   | UM   | UM   | UM   | UM   | UM   |
| AT1G21940 | UM   |
| AT1G21950 | UM   |
| AT1G21960 | UM   |
| AT1G21970 | UM   |
| AT1G21975 | UM   |
| AT1G21980 | UM   |
| AT1G21990 | UM   |
| AT1G22000 | mCHH |
| AT1G22010 | UM   |
| AT1G22015 | UM   | UM   | UM   | UM   | UM   | UM   | mCHH | UM   |
| AT1G22020 | UM   |
| AT1G22030 | UM   |
| AT1G22040 | gbM  | gbM  | gbM  | gbM  | UM   | UM   | gbM  | UM   |
| AT1G22050 | UM   |
| AT1G22060 | mCHH | mCHH | mCHH | gbM  | gbM  | gbM  | mCHH | gbM  |
| AT1G22065 | UM   |
| AT1G22067 | mCHH | mCHH | mCHH | UM   | mCHH | UM   | mCHH | mCHH |
| AT1G22070 | gbM  | UM   |
| AT1G22080 | UM   |
| AT1G22090 | UM   |
| AT1G22100 | UM   | mCHH | UM   | UM   | UM   | UM   | mCHH | UM   |
| AT1G22110 | UM   |
| AT1G22120 | UM   |
| AT1G22130 | UM   | UM   | UM   | UM   | UM   | UM   | mCHH | UM   |
| AT1G22140 | UM   |
| AT1G22150 | UM   |
| AT1G22160 | UM   |
| AT1G22170 | UM   |
| AT1G22180 | UM   |
| AT1G22190 | UM   |
| AT1G22200 | UM   | UM   | UM   | UM   | UM   | UM   | mCHH | UM   |
| AT1G22210 | UM   |
| AT1G22220 | UM   |
| AT1G22230 | UM   | UM   | UM   | UM   | UM   | UM   | mCHH | UM   |
| AT1G22240 | UM   |
| AT1G22250 | UM   | UM   | UM   | UM   | UM   | UM   | mCHH | UM   |
| AT1G22260 | UM   | UM   | UM   | UM   | UM   | UM   | mCHH | UM   |
| AT1G22270 | UM   |
| AT1G22275 | UM   | UM   | UM   | UM   | UM   | UM   | mCHH | UM   |
| AT1G22280 | UM   |

|           |     |      |     |     |     |     |      |     |
|-----------|-----|------|-----|-----|-----|-----|------|-----|
| AT1G22290 | UM  | gbM  | UM  | UM  | UM  | UM  | UM   | UM  |
| AT1G22300 | UM  | UM   | UM  | UM  | UM  | UM  | UM   | UM  |
| AT1G22310 | UM  | UM   | UM  | UM  | UM  | UM  | UM   | UM  |
| AT1G22330 | UM  | UM   | UM  | UM  | UM  | UM  | UM   | UM  |
| AT1G22340 | UM  | UM   | UM  | UM  | UM  | UM  | UM   | UM  |
| AT1G22360 | UM  | UM   | UM  | UM  | UM  | UM  | UM   | UM  |
| AT1G22370 | UM  | UM   | UM  | UM  | UM  | UM  | UM   | UM  |
| AT1G22380 | UM  | UM   | UM  | UM  | UM  | UM  | UM   | UM  |
| AT1G22400 | UM  | UM   | UM  | UM  | UM  | UM  | UM   | UM  |
| AT1G22410 | UM  | UM   | UM  | UM  | UM  | UM  | UM   | UM  |
| AT1G22420 | UM  | UM   | UM  | UM  | UM  | UM  | UM   | UM  |
| AT1G22430 | UM  | UM   | UM  | UM  | UM  | UM  | UM   | UM  |
| AT1G22440 | UM  | UM   | UM  | UM  | UM  | UM  | UM   | UM  |
| AT1G22450 | UM  | UM   | UM  | UM  | UM  | UM  | mCHH | UM  |
| AT1G22460 | UM  | UM   | UM  | UM  | UM  | UM  | mCHH | UM  |
| AT1G22470 | UM  | UM   | UM  | UM  | UM  | UM  | UM   | UM  |
| AT1G22480 | UM  | UM   | UM  | UM  | UM  | UM  | UM   | UM  |
| AT1G22490 | UM  | UM   | UM  | UM  | UM  | UM  | UM   | UM  |
| AT1G22500 | UM  | UM   | UM  | UM  | UM  | UM  | UM   | UM  |
| AT1G22510 | UM  | UM   | UM  | UM  | UM  | UM  | UM   | UM  |
| AT1G22520 | UM  | UM   | UM  | UM  | UM  | UM  | UM   | UM  |
| AT1G22530 | UM  | mCHH | UM  | UM  | UM  | UM  | UM   | UM  |
| AT1G22540 | UM  | UM   | UM  | UM  | UM  | UM  | UM   | UM  |
| AT1G22550 | UM  | UM   | UM  | UM  | UM  | UM  | UM   | UM  |
| AT1G22570 | UM  | UM   | UM  | UM  | UM  | UM  | UM   | UM  |
| AT1G22590 | UM  | UM   | UM  | UM  | UM  | UM  | UM   | UM  |
| AT1G22600 | UM  | UM   | UM  | UM  | UM  | UM  | UM   | UM  |
| AT1G22610 | UM  | UM   | UM  | UM  | UM  | UM  | UM   | UM  |
| AT1G22620 | gbM | gbM  | gbM | gbM | gbM | gbM | gbM  | gbM |
| AT1G22630 | UM  | UM   | UM  | UM  | UM  | UM  | UM   | UM  |
| AT1G22640 | UM  | UM   | UM  | UM  | UM  | UM  | UM   | UM  |
| AT1G22650 | UM  | UM   | UM  | UM  | UM  | UM  | UM   | UM  |
| AT1G22651 | UM  | UM   | UM  | UM  | UM  | UM  | UM   | UM  |
| AT1G22660 | UM  | UM   | UM  | UM  | UM  | UM  | UM   | UM  |
| AT1G22670 | UM  | UM   | UM  | UM  | UM  | UM  | UM   | UM  |
| AT1G22680 | UM  | UM   | UM  | UM  | UM  | UM  | UM   | UM  |
| AT1G22690 | UM  | UM   | UM  | UM  | UM  | UM  | UM   | UM  |
| AT1G22700 | UM  | UM   | UM  | UM  | UM  | UM  | UM   | UM  |
| AT1G22710 | UM  | UM   | UM  | UM  | UM  | UM  | UM   | UM  |
| AT1G22720 | UM  | UM   | UM  | UM  | UM  | UM  | UM   | UM  |
| AT1G22730 | gbM | gbM  | gbM | UM  | UM  | UM  | gbM  | UM  |
| AT1G22740 | UM  | UM   | UM  | UM  | UM  | UM  | UM   | UM  |
| AT1G22750 | UM  | UM   | UM  | UM  | UM  | UM  | UM   | UM  |
| AT1G22760 | UM  | UM   | UM  | UM  | UM  | UM  | UM   | UM  |
| AT1G22767 | UM  | UM   | UM  | UM  | UM  | UM  | UM   | UM  |
| AT1G22770 | gbM | gbM  | gbM | gbM | gbM | gbM | gbM  | gbM |
| AT1G22780 | UM  | UM   | UM  | UM  | UM  | UM  | UM   | UM  |
| AT1G22790 | UM  | UM   | gbM | UM  | UM  | UM  | UM   | UM  |

|           |     |      |     |     |      |      |      |      |
|-----------|-----|------|-----|-----|------|------|------|------|
| AT1G22800 | UM  | UM   | UM  | UM  | UM   | UM   | UM   | UM   |
| AT1G22810 | UM  | UM   | UM  | UM  | UM   | UM   | UM   | UM   |
| AT1G22830 | UM  | UM   | UM  | UM  | UM   | UM   | mCHH | UM   |
| AT1G22840 | UM  | UM   | UM  | UM  | UM   | UM   | UM   | UM   |
| AT1G22850 | UM  | UM   | UM  | UM  | UM   | UM   | mCHH | UM   |
| AT1G22860 | UM  | mCHH | gbM | UM  | UM   | UM   | UM   | UM   |
| AT1G22870 | UM  | UM   | UM  | UM  | UM   | UM   | UM   | UM   |
| AT1G22880 | UM  | UM   | UM  | UM  | UM   | UM   | UM   | UM   |
| AT1G22882 | UM  | mCHH | UM  | UM  | UM   | UM   | mCHH | UM   |
| AT1G22885 | UM  | UM   | UM  | UM  | UM   | UM   | UM   | UM   |
| AT1G22890 | UM  | UM   | UM  | UM  | UM   | UM   | UM   | UM   |
| AT1G22900 | UM  | UM   | UM  | UM  | UM   | UM   | UM   | UM   |
| AT1G22910 | UM  | UM   | UM  | UM  | UM   | UM   | UM   | UM   |
| AT1G22920 | UM  | UM   | UM  | UM  | UM   | UM   | UM   | UM   |
| AT1G22930 | gbM | gbM  | gbM | gbM | UM   | UM   | mCHH | gbM  |
| AT1G22940 | UM  | UM   | UM  | UM  | UM   | UM   | UM   | UM   |
| AT1G22950 | UM  | UM   | UM  | UM  | UM   | UM   | UM   | UM   |
| AT1G22960 | gbM | gbM  | gbM | gbM | UM   | gbM  | gbM  | UM   |
| AT1G22970 | UM  | UM   | UM  | UM  | UM   | UM   | UM   | UM   |
| AT1G22980 | UM  | UM   | UM  | UM  | UM   | UM   | UM   | UM   |
| AT1G22985 | UM  | UM   | UM  | UM  | UM   | UM   | UM   | UM   |
| AT1G22990 | UM  | UM   | UM  | UM  | UM   | UM   | UM   | UM   |
| AT1G23000 | UM  | UM   | UM  | UM  | UM   | UM   | UM   | UM   |
| AT1G23010 | UM  | UM   | UM  | UM  | UM   | UM   | UM   | UM   |
| AT1G23020 | UM  | UM   | UM  | UM  | UM   | UM   | UM   | UM   |
| AT1G23030 | gbM | gbM  | gbM | UM  | gbM  | UM   | gbM  | gbM  |
| AT1G23037 | UM  | UM   | UM  | UM  | UM   | UM   | UM   | UM   |
| AT1G23040 | UM  | UM   | UM  | UM  | UM   | UM   | UM   | UM   |
| AT1G23050 | UM  | UM   | UM  | UM  | UM   | UM   | UM   | UM   |
| AT1G23060 | UM  | UM   | UM  | UM  | UM   | UM   | UM   | UM   |
| AT1G23070 | UM  | UM   | UM  | UM  | UM   | UM   | UM   | UM   |
| AT1G23074 | UM  | UM   | UM  | UM  | UM   | UM   | UM   | UM   |
| AT1G23080 | UM  | UM   | UM  | UM  | UM   | UM   | UM   | UM   |
| AT1G23090 | UM  | UM   | UM  | UM  | UM   | UM   | UM   | UM   |
| AT1G23100 | UM  | UM   | UM  | UM  | UM   | UM   | UM   | UM   |
| AT1G23110 | UM  | UM   | UM  | UM  | UM   | UM   | UM   | UM   |
| AT1G23120 | UM  | UM   | UM  | UM  | UM   | UM   | UM   | UM   |
| AT1G23130 | UM  | UM   | UM  | UM  | mCHH | mCHH | UM   | mCHH |
| AT1G23140 | UM  | UM   | UM  | UM  | UM   | UM   | UM   | UM   |
| AT1G23145 | UM  | UM   | UM  | UM  | UM   | UM   | UM   | UM   |
| AT1G23147 | UM  | UM   | UM  | UM  | UM   | UM   | UM   | UM   |
| AT1G23149 | UM  | UM   | UM  | UM  | UM   | UM   | UM   | UM   |
| AT1G23150 | UM  | UM   | UM  | UM  | UM   | UM   | UM   | UM   |
| AT1G23160 | UM  | UM   | UM  | UM  | UM   | UM   | UM   | UM   |
| AT1G23170 | UM  | UM   | UM  | UM  | UM   | UM   | UM   | UM   |
| AT1G23180 | gbM | gbM  | gbM | gbM | gbM  | gbM  | gbM  | gbM  |
| AT1G23190 | gbM | gbM  | gbM | gbM | gbM  | gbM  | gbM  | gbM  |
| AT1G23200 | UM  | UM   | UM  | UM  | UM   | UM   | UM   | UM   |

|           |      |      |      |      |      |      |      |     |
|-----------|------|------|------|------|------|------|------|-----|
| AT1G23201 | UM   | UM  |
| AT1G23205 | UM   | UM  |
| AT1G23210 | UM   | UM  |
| AT1G23220 | UM   | UM  |
| AT1G23230 | gbM  | mCHH | gbM  | gbM  | gbM  | gbM  | mCHH | gbM |
| AT1G23240 | UM   | UM  |
| AT1G23250 | UM   | UM  |
| AT1G23260 | UM   | UM  |
| AT1G23270 | UM   | UM  |
| AT1G23280 | UM   | UM  |
| AT1G23290 | UM   | UM  |
| AT1G23300 | UM   | UM  |
| AT1G23310 | UM   | UM  |
| AT1G23320 | UM   | UM  |
| AT1G23330 | UM   | UM  |
| AT1G23340 | UM   | UM  |
| AT1G23350 | UM   | UM  |
| AT1G23360 | UM   | UM  |
| AT1G23380 | UM   | UM  |
| AT1G23390 | UM   | UM  |
| AT1G23400 | UM   | UM  |
| AT1G23410 | UM   | UM  |
| AT1G23420 | UM   | UM  |
| AT1G23440 | UM   | UM  |
| AT1G23450 | UM   | UM  |
| AT1G23460 | UM   | UM  |
| AT1G23465 | UM   | UM  |
| AT1G23480 | UM   | UM   | mCHG | gbM  | UM   | UM   | mCHH | UM  |
| AT1G23490 | UM   | UM  |
| AT1G23500 | UM   | UM  |
| AT1G23510 | UM   | UM   | UM   | UM   | UM   | UM   | mCHH | UM  |
| AT1G23520 | UM   | UM  |
| AT1G23530 | UM   | UM  |
| AT1G23540 | UM   | UM  |
| AT1G23550 | UM   | UM  |
| AT1G23560 | UM   | UM  |
| AT1G23570 | UM   | UM  |
| AT1G23580 | UM   | UM  |
| AT1G23590 | UM   | UM  |
| AT1G23600 | UM   | UM  |
| AT1G23610 | UM   | UM  |
| AT1G23640 | UM   | UM  |
| AT1G23650 | mCHH | UM  |
| AT1G23660 | UM   | UM  |
| AT1G23670 | UM   | UM  |
| AT1G23680 | UM   | UM  |
| AT1G23690 | UM   | UM  |
| AT1G23700 | UM   | UM  |

|           |      |      |      |      |      |      |      |      |
|-----------|------|------|------|------|------|------|------|------|
| AT1G23710 | UM   |
| AT1G23720 | mCHH |
| AT1G23724 | UM   |
| AT1G23730 | UM   |
| AT1G23740 | UM   |
| AT1G23750 | UM   |
| AT1G23760 | UM   |
| AT1G23770 | UM   |
| AT1G23780 | UM   |
| AT1G23790 | UM   |
| AT1G23800 | UM   |
| AT1G23810 | UM   |
| AT1G23820 | UM   |
| AT1G23830 | UM   | UM   | UM   | UM   | UM   | UM   | mCHH | UM   |
| AT1G23840 | UM   |
| AT1G23850 | UM   |
| AT1G23860 | UM   |
| AT1G23870 | gbM  |
| AT1G23880 | gbM  | UM   |
| AT1G23890 | UM   |
| AT1G23900 | gbM  | gbM  | gbM  | gbM  | gbM  | gbM  | mCHH | gbM  |
| AT1G23910 | UM   |
| AT1G23935 | UM   | UM   | UM   | UM   | UM   | UM   | mCHH | UM   |
| AT1G23940 | UM   |
| AT1G23950 | UM   | UM   | UM   | UM   | UM   | UM   | mCHH | UM   |
| AT1G23960 | UM   |
| AT1G23965 | UM   |
| AT1G23970 | UM   |
| AT1G23980 | UM   |
| AT1G24000 | UM   |
| AT1G24010 | UM   |
| AT1G24020 | UM   |
| AT1G24030 | gbM  |
| AT1G24040 | UM   |
| AT1G24050 | UM   |
| AT1G24060 | UM   |
| AT1G24062 | UM   |
| AT1G24070 | UM   |
| AT1G24090 | UM   |
| AT1G24095 | UM   |
| AT1G24100 | UM   |
| AT1G24110 | UM   |
| AT1G24120 | gbM  | gbM  | gbM  | gbM  | UM   | UM   | mCHH | UM   |
| AT1G24130 | UM   |
| AT1G24140 | UM   |
| AT1G24145 | UM   |
| AT1G24147 | UM   |
| AT1G24148 | UM   |



|           |      |      |      |      |      |      |      |      |
|-----------|------|------|------|------|------|------|------|------|
| AT1G24150 | UM   |
| AT1G24159 | UM   |
| AT1G24160 | gbM  |
| AT1G24170 | UM   |
| AT1G24180 | UM   |
| AT1G24190 | gbM  | mCHH | gbM  | gbM  | gbM  | gbM  | mCHH | gbM  |
| AT1G24200 | UM   |
| AT1G24210 | UM   |
| AT1G24220 | UM   |
| AT1G24230 | UM   |
| AT1G24240 | UM   |
| AT1G24250 | UM   |
| AT1G24256 | UM   |
| AT1G24260 | UM   |
| AT1G24265 | UM   |
| AT1G24267 | UM   |
| AT1G24270 | UM   |
| AT1G24280 | gbM  | gbM  | gbM  | UM   | gbM  | gbM  | gbM  | gbM  |
| AT1G24290 | UM   |
| AT1G24300 | gbM  | gbM  | gbM  | gbM  | gbM  | gbM  | mCHH | gbM  |
| AT1G24310 | UM   |
| AT1G24320 | UM   | mCHH | UM   | UM   | UM   | UM   | UM   | UM   |
| AT1G24330 | UM   |
| AT1G24340 | UM   | gbM  | UM   | UM   | UM   | UM   | gbM  | UM   |
| AT1G24350 | UM   |
| AT1G24360 | UM   |
| AT1G24380 | mCHH |
| AT1G24388 | mCHH |
| AT1G24390 | mCHH |
| AT1G24400 | UM   |
| AT1G24405 | UM   |
| AT1G24420 | UM   |
| AT1G24430 | UM   | UM   | UM   | UM   | UM   | UM   | mCHH | UM   |
| AT1G24440 | UM   | gbM  | UM   | UM   | UM   | UM   | mCHH | UM   |
| AT1G24450 | UM   |
| AT1G24460 | gbM  | mCHH | gbM  | gbM  | gbM  | gbM  | mCHH | gbM  |
| AT1G24470 | UM   |
| AT1G24480 | UM   |
| AT1G24485 | UM   |
| AT1G24490 | UM   |
| AT1G24510 | UM   |
| AT1G24520 | UM   |
| AT1G24530 | UM   |
| AT1G24540 | UM   |
| AT1G24560 | UM   |
| AT1G24570 | UM   |
| AT1G24575 | UM   |
| AT1G24577 | UM   |

|           |      |      |         |         |         |         |      |         |
|-----------|------|------|---------|---------|---------|---------|------|---------|
| AT1G24580 | UM   | mCHH | UM      | UM      | UM      | UM      | mCHH | UM      |
| AT1G24590 | UM   | UM   | UM      | UM      | UM      | UM      | UM   | UM      |
| AT1G24600 | UM   | UM   | UM      | UM      | UM      | UM      | UM   | UM      |
| AT1G24610 | UM   | UM   | UM      | UM      | UM      | UM      | UM   | UM      |
| AT1G24620 | UM   | UM   | UM      | UM      | UM      | UM      | UM   | UM      |
| AT1G24625 | UM   | UM   | UM      | UM      | UM      | UM      | UM   | UM      |
| AT1G24650 | UM   | UM   | UM      | UM      | UM      | UM      | UM   | UM      |
| AT1G24706 | gbM  | mCHH | gbM     | gbM     | gbM     | gbM     | mCHH | gbM     |
| AT1G24735 | UM   | UM   | UM      | UM      | UM      | UM      | UM   | UM      |
| AT1G24764 | UM   | UM   | UM      | UM      | UM      | UM      | gbM  | UM      |
| AT1G24793 | UM   | UM   | UM      | UM      | UM      | unknown | UM   | UM      |
| AT1G24800 | UM   | UM   | UM      | UM      | UM      | UM      | UM   | UM      |
| AT1G24807 | UM   | mCHH | mCHG    | UM      | UM      | unknown | UM   | unknown |
| AT1G24822 | UM   | UM   | UM      | UM      | UM      | unknown | UM   | unknown |
| AT1G24851 | mCHH | mCHH | mCHH    | UM      | UM      | mCHG    | mCHH | mCHG    |
| AT1G24880 | UM   | UM   | UM      | UM      | UM      | UM      | UM   | UM      |
| AT1G24881 | UM   | UM   | UM      | UM      | UM      | UM      | UM   | UM      |
| AT1G24909 | UM   | UM   | mCHH    | UM      | unknown | unknown | mCHG | unknown |
| AT1G24996 | UM   | UM   | UM      | UM      | UM      | UM      | UM   | unknown |
| AT1G25025 | mCHH | mCHH | mCHH    | UM      | mCHG    | mCHG    | mCHH | mCHG    |
| AT1G25054 | UM   | UM   | UM      | UM      | UM      | UM      | UM   | UM      |
| AT1G25055 | UM   | UM   | UM      | UM      | UM      | UM      | UM   | UM      |
| AT1G25083 | UM   | mCHH | mCHH    | UM      | UM      | UM      | mCHG | unknown |
| AT1G25097 | UM   | UM   | UM      | UM      | UM      | UM      | UM   | UM      |
| AT1G25112 | mCHH | mCHH | mCHH    | mCHG    | mCHG    | mCHG    | mCHH | gbM     |
| AT1G25141 | mCHG | mCHG | UM      | unknown | unknown | unknown | UM   | unknown |
| AT1G25145 | UM   | UM   | UM      | UM      | UM      | UM      | UM   | UM      |
| AT1G25150 | UM   | UM   | UM      | UM      | UM      | UM      | UM   | UM      |
| AT1G25155 | UM   | UM   | UM      | UM      | UM      | UM      | mCHH | unknown |
| AT1G25180 | mCHH | mCHH | mCHH    | gbM     | mCHH    | mCHG    | mCHH | UM      |
| AT1G25210 | UM   | UM   | unknown | UM      | UM      | UM      | UM   | UM      |
| AT1G25211 | UM   | UM   | UM      | UM      | UM      | UM      | UM   | UM      |
| AT1G25220 | mCHH | mCHH | mCHH    | mCHG    | mCHG    | mCHG    | mCHH | mCHG    |
| AT1G25230 | UM   | UM   | UM      | UM      | UM      | UM      | UM   | UM      |
| AT1G25240 | UM   | UM   | UM      | UM      | UM      | UM      | UM   | UM      |
| AT1G25250 | UM   | UM   | UM      | UM      | UM      | UM      | UM   | UM      |
| AT1G25260 | UM   | UM   | UM      | UM      | UM      | UM      | UM   | UM      |
| AT1G25270 | UM   | UM   | UM      | UM      | UM      | UM      | UM   | UM      |
| AT1G25275 | UM   | UM   | UM      | UM      | UM      | UM      | UM   | UM      |
| AT1G25280 | gbM  | gbM  | gbM     | gbM     | gbM     | gbM     | gbM  | gbM     |
| AT1G25290 | UM   | UM   | UM      | UM      | UM      | UM      | UM   | UM      |
| AT1G25300 | UM   | UM   | UM      | UM      | UM      | UM      | UM   | UM      |
| AT1G25310 | UM   | UM   | UM      | UM      | UM      | UM      | UM   | UM      |
| AT1G25320 | gbM  | mCHH | UM      | UM      | UM      | UM      | gbM  | UM      |
| AT1G25330 | UM   | UM   | UM      | UM      | UM      | UM      | UM   | UM      |
| AT1G25340 | UM   | UM   | UM      | UM      | UM      | UM      | UM   | UM      |
| AT1G25350 | gbM  | gbM  | gbM     | gbM     | gbM     | gbM     | mCHH | gbM     |
| AT1G25360 | UM   | gbM  | UM      | UM      | UM      | UM      | UM   | UM      |





|           |      |      |      |      |    |    |      |         |
|-----------|------|------|------|------|----|----|------|---------|
| AT1G26762 | mCHH | mCHH | mCHH | mCHH | UM | UM | mCHH | mCHH    |
| AT1G26770 | UM   | UM   | UM   | UM   | UM | UM | UM   | UM      |
| AT1G26771 | UM   | UM   | UM   | UM   | UM | UM | UM   | UM      |
| AT1G26773 | UM   | UM   | UM   | UM   | UM | UM | UM   | UM      |
| AT1G26780 | UM   | UM   | UM   | UM   | UM | UM | UM   | UM      |
| AT1G26790 | UM   | UM   | UM   | UM   | UM | UM | UM   | UM      |
| AT1G26795 | UM   | UM   | UM   | UM   | UM | UM | UM   | UM      |
| AT1G26796 | UM   | UM   | UM   | UM   | UM | UM | UM   | UM      |
| AT1G26797 | UM   | UM   | UM   | UM   | UM | UM | UM   | UM      |
| AT1G26798 | UM   | UM   | UM   | UM   | UM | UM | UM   | UM      |
| AT1G26799 | UM   | UM   | UM   | UM   | UM | UM | UM   | UM      |
| AT1G26800 | UM   | UM   | UM   | UM   | UM | UM | UM   | UM      |
| AT1G26810 | UM   | UM   | UM   | UM   | UM | UM | UM   | UM      |
| AT1G26815 | UM   | UM   | UM   | UM   | UM | UM | mCHH | UM      |
| AT1G26820 | UM   | UM   | UM   | UM   | UM | UM | UM   | UM      |
| AT1G26830 | UM   | UM   | UM   | UM   | UM | UM | UM   | UM      |
| AT1G26840 | UM   | UM   | UM   | UM   | UM | UM | UM   | UM      |
| AT1G26850 | UM   | UM   | UM   | UM   | UM | UM | UM   | UM      |
| AT1G26870 | UM   | UM   | UM   | UM   | UM | UM | UM   | UM      |
| AT1G26880 | UM   | UM   | UM   | UM   | UM | UM | UM   | UM      |
| AT1G26890 | UM   | UM   | UM   | UM   | UM | UM | UM   | UM      |
| AT1G26900 | UM   | UM   | UM   | UM   | UM | UM | UM   | UM      |
| AT1G26910 | UM   | UM   | UM   | UM   | UM | UM | UM   | UM      |
| AT1G26916 | UM   | UM   | UM   | UM   | UM | UM | UM   | unknown |
| AT1G26920 | UM   | UM   | UM   | UM   | UM | UM | UM   | UM      |
| AT1G26921 | UM   | UM   | UM   | UM   | UM | UM | UM   | UM      |
| AT1G26930 | UM   | UM   | UM   | UM   | UM | UM | UM   | UM      |
| AT1G26940 | UM   | UM   | UM   | UM   | UM | UM | UM   | UM      |
| AT1G26945 | UM   | UM   | UM   | UM   | UM | UM | UM   | UM      |
| AT1G26960 | UM   | UM   | UM   | UM   | UM | UM | mCHH | UM      |
| AT1G26970 | UM   | UM   | UM   | UM   | UM | UM | UM   | UM      |
| AT1G26976 | UM   | UM   | UM   | UM   | UM | UM | UM   | UM      |
| AT1G27000 | UM   | mCHG | UM   | UM   | UM | UM | UM   | UM      |
| AT1G27008 | UM   | UM   | UM   | UM   | UM | UM | UM   | UM      |
| AT1G27020 | UM   | UM   | UM   | UM   | UM | UM | UM   | UM      |
| AT1G27030 | UM   | UM   | UM   | UM   | UM | UM | UM   | UM      |
| AT1G27040 | UM   | UM   | UM   | UM   | UM | UM | UM   | UM      |
| AT1G27045 | UM   | UM   | UM   | UM   | UM | UM | UM   | UM      |
| AT1G27050 | UM   | UM   | UM   | UM   | UM | UM | UM   | UM      |
| AT1G27060 | UM   | UM   | UM   | UM   | UM | UM | UM   | UM      |
| AT1G27070 | UM   | UM   | UM   | UM   | UM | UM | UM   | UM      |
| AT1G27080 | UM   | UM   | UM   | UM   | UM | UM | UM   | UM      |
| AT1G27090 | UM   | UM   | UM   | UM   | UM | UM | UM   | UM      |
| AT1G27100 | UM   | UM   | UM   | UM   | UM | UM | UM   | UM      |
| AT1G27110 | UM   | UM   | UM   | UM   | UM | UM | UM   | UM      |
| AT1G27120 | UM   | UM   | UM   | UM   | UM | UM | mCHH | UM      |
| AT1G27130 | UM   | UM   | UM   | UM   | UM | UM | UM   | UM      |
| AT1G27135 | UM   | UM   | UM   | UM   | UM | UM | UM   | UM      |



|           |      |      |      |      |      |      |      |      |
|-----------|------|------|------|------|------|------|------|------|
| AT1G27590 | UM   | UM   | UM   | UM   | UM   | UM   | gbM  | UM   |
| AT1G27595 | gbM  |
| AT1G27600 | UM   |
| AT1G27610 | UM   |
| AT1G27620 | UM   |
| AT1G27630 | UM   |
| AT1G27640 | UM   |
| AT1G27650 | UM   | UM   | UM   | UM   | UM   | UM   | mCHH | UM   |
| AT1G27660 | UM   |
| AT1G27670 | UM   |
| AT1G27680 | UM   | gbM  | UM   | UM   | UM   | UM   | UM   | UM   |
| AT1G27690 | UM   |
| AT1G27695 | UM   |
| AT1G27700 | UM   |
| AT1G27710 | UM   |
| AT1G27720 | UM   |
| AT1G27730 | UM   |
| AT1G27740 | UM   |
| AT1G27750 | gbM  |
| AT1G27752 | UM   | UM   | UM   | UM   | UM   | UM   | mCHH | UM   |
| AT1G27760 | UM   |
| AT1G27770 | UM   | UM   | UM   | UM   | UM   | UM   | mCHH | UM   |
| AT1G27820 | UM   |
| AT1G27840 | UM   | UM   | UM   | UM   | UM   | UM   | gbM  | UM   |
| AT1G27850 | gbM  | gbM  | gbM  | gbM  | gbM  | gbM  | mCHH | gbM  |
| AT1G27860 | UM   |
| AT1G27870 | mCHH |
| AT1G27880 | UM   | gbM  | gbM  | UM   | UM   | UM   | gbM  | UM   |
| AT1G27890 | UM   |
| AT1G27900 | UM   | gbM  | UM   | UM   | UM   | UM   | gbM  | UM   |
| AT1G27910 | UM   | UM   | UM   | UM   | UM   | UM   | mCHH | UM   |
| AT1G27920 | gbM  | gbM  | UM   | gbM  | gbM  | UM   | gbM  | UM   |
| AT1G27930 | UM   |
| AT1G27940 | UM   | UM   | UM   | UM   | UM   | UM   | mCHH | UM   |
| AT1G27950 | UM   |
| AT1G27960 | UM   | gbM  | gbM  | gbM  | UM   | gbM  | gbM  | UM   |
| AT1G27970 | UM   |
| AT1G27980 | UM   |
| AT1G27990 | UM   |
| AT1G28000 | mCHH | mCHH | mCHH | mCHG | UM   | UM   | mCHH | UM   |
| AT1G28007 | UM   |
| AT1G28010 | UM   |
| AT1G28020 | UM   |
| AT1G28030 | UM   |
| AT1G28040 | UM   |
| AT1G28050 | UM   |
| AT1G28060 | UM   | UM   | UM   | UM   | UM   | UM   | mCHH | UM   |
| AT1G28070 | UM   |





|           |      |      |      |     |     |     |      |     |
|-----------|------|------|------|-----|-----|-----|------|-----|
| AT1G28460 | UM   | UM   | UM   | UM  | UM  | UM  | UM   | UM  |
| AT1G28470 | UM   | UM   | UM   | UM  | UM  | UM  | UM   | UM  |
| AT1G28480 | UM   | UM   | UM   | UM  | UM  | UM  | UM   | UM  |
| AT1G28490 | UM   | UM   | UM   | UM  | UM  | UM  | UM   | UM  |
| AT1G28500 | UM   | UM   | UM   | UM  | UM  | UM  | UM   | UM  |
| AT1G28510 | UM   | UM   | UM   | UM  | UM  | UM  | UM   | UM  |
| AT1G28520 | gbM  | UM   | UM   | UM  | UM  | UM  | gbM  | UM  |
| AT1G28530 | UM   | UM   | UM   | UM  | UM  | UM  | UM   | UM  |
| AT1G28540 | UM   | UM   | UM   | UM  | UM  | UM  | UM   | UM  |
| AT1G28550 | UM   | UM   | UM   | UM  | UM  | UM  | UM   | UM  |
| AT1G28560 | UM   | UM   | UM   | UM  | UM  | UM  | UM   | UM  |
| AT1G28570 | UM   | UM   | UM   | UM  | UM  | UM  | UM   | UM  |
| AT1G28580 | UM   | UM   | UM   | UM  | UM  | UM  | UM   | UM  |
| AT1G28590 | UM   | UM   | UM   | UM  | UM  | UM  | UM   | UM  |
| AT1G28600 | UM   | UM   | UM   | UM  | UM  | UM  | UM   | UM  |
| AT1G28610 | UM   | UM   | UM   | UM  | UM  | UM  | UM   | UM  |
| AT1G28630 | UM   | UM   | UM   | UM  | UM  | UM  | UM   | UM  |
| AT1G28640 | UM   | UM   | UM   | UM  | UM  | UM  | UM   | UM  |
| AT1G28650 | UM   | UM   | UM   | UM  | UM  | UM  | UM   | UM  |
| AT1G28660 | UM   | UM   | UM   | UM  | UM  | UM  | UM   | UM  |
| AT1G28670 | UM   | UM   | UM   | UM  | UM  | UM  | UM   | UM  |
| AT1G28680 | UM   | UM   | UM   | UM  | UM  | UM  | UM   | UM  |
| AT1G28690 | UM   | UM   | UM   | UM  | UM  | UM  | UM   | UM  |
| AT1G28695 | UM   | UM   | UM   | UM  | UM  | UM  | UM   | UM  |
| AT1G28700 | UM   | UM   | UM   | UM  | UM  | UM  | UM   | UM  |
| AT1G28710 | UM   | gbM  | UM   | UM  | UM  | UM  | UM   | UM  |
| AT1G28760 | UM   | UM   | UM   | UM  | UM  | UM  | UM   | UM  |
| AT1G28815 | UM   | UM   | UM   | UM  | UM  | UM  | UM   | UM  |
| AT1G28960 | UM   | UM   | UM   | UM  | UM  | UM  | UM   | UM  |
| AT1G29000 | mCHH | mCHH | mCHH | UM  | UM  | UM  | mCHH | UM  |
| AT1G29010 | UM   | UM   | UM   | UM  | UM  | UM  | UM   | UM  |
| AT1G29020 | UM   | UM   | UM   | UM  | UM  | UM  | mCHH | UM  |
| AT1G29025 | UM   | UM   | UM   | UM  | UM  | UM  | UM   | UM  |
| AT1G29030 | UM   | gbM  | UM   | UM  | UM  | UM  | gbM  | UM  |
| AT1G29040 | UM   | UM   | UM   | UM  | UM  | UM  | UM   | UM  |
| AT1G29041 | UM   | UM   | UM   | UM  | UM  | UM  | UM   | UM  |
| AT1G29050 | UM   | UM   | UM   | UM  | UM  | UM  | UM   | UM  |
| AT1G29060 | UM   | UM   | UM   | UM  | UM  | UM  | UM   | UM  |
| AT1G29070 | UM   | UM   | UM   | UM  | UM  | UM  | UM   | UM  |
| AT1G29080 | UM   | UM   | UM   | UM  | UM  | UM  | UM   | UM  |
| AT1G29090 | UM   | UM   | UM   | UM  | UM  | UM  | UM   | UM  |
| AT1G29100 | UM   | UM   | UM   | UM  | UM  | UM  | UM   | UM  |
| AT1G29110 | UM   | UM   | UM   | UM  | UM  | UM  | UM   | UM  |
| AT1G29120 | UM   | UM   | UM   | UM  | UM  | UM  | UM   | UM  |
| AT1G29140 | UM   | UM   | UM   | UM  | UM  | UM  | UM   | UM  |
| AT1G29150 | gbM  | gbM  | gbM  | gbM | gbM | gbM | gbM  | gbM |
| AT1G29160 | UM   | UM   | UM   | UM  | UM  | UM  | UM   | UM  |
| AT1G29170 | gbM  | gbM  | UM   | UM  | UM  | UM  | mCHH | UM  |

|           |      |      |      |      |      |      |      |      |
|-----------|------|------|------|------|------|------|------|------|
| AT1G29179 | UM   |
| AT1G29180 | UM   | gbM  | UM   | UM   | UM   | UM   | mCHH | UM   |
| AT1G29195 | UM   |
| AT1G29200 | UM   | UM   | UM   | UM   | UM   | UM   | mCHH | UM   |
| AT1G29220 | UM   | mCHG | UM   | UM   | UM   | UM   | UM   | UM   |
| AT1G29230 | UM   |
| AT1G29240 | UM   |
| AT1G29250 | UM   |
| AT1G29260 | UM   |
| AT1G29270 | UM   |
| AT1G29280 | UM   |
| AT1G29290 | UM   |
| AT1G29300 | UM   |
| AT1G29310 | UM   | UM   | UM   | UM   | UM   | UM   | mCHH | gbM  |
| AT1G29320 | UM   | UM   | UM   | UM   | UM   | UM   | mCHH | UM   |
| AT1G29330 | UM   |
| AT1G29340 | gbM  |
| AT1G29350 | gbM  |
| AT1G29355 | UM   |
| AT1G29370 | gbM  |
| AT1G29380 | UM   |
| AT1G29390 | UM   | UM   | UM   | UM   | UM   | UM   | mCHH | UM   |
| AT1G29395 | UM   |
| AT1G29400 | gbM  |
| AT1G29410 | UM   | gbM  | UM   | UM   | UM   | UM   | UM   | UM   |
| AT1G29418 | UM   |
| AT1G29420 | UM   |
| AT1G29430 | UM   |
| AT1G29440 | gbM  | gbM  | gbM  | UM   | gbM  | gbM  | gbM  | UM   |
| AT1G29450 | UM   |
| AT1G29460 | UM   |
| AT1G29465 | UM   |
| AT1G29470 | gbM  | mCHH | gbM  | gbM  | gbM  | gbM  | mCHG | gbM  |
| AT1G29480 | UM   |
| AT1G29490 | gbM  | gbM  | gbM  | gbM  | gbM  | gbM  | mCHG | gbM  |
| AT1G29500 | UM   |
| AT1G29510 | UM   |
| AT1G29520 | UM   |
| AT1G29530 | UM   |
| AT1G29540 | gbM  | UM   |
| AT1G29550 | UM   |
| AT1G29560 | UM   | UM   | UM   | UM   | UM   | UM   | mCHH | UM   |
| AT1G29570 | UM   |
| AT1G29580 | UM   |
| AT1G29590 | UM   |
| AT1G29600 | UM   |
| AT1G29620 | mCHH | mCHG |
| AT1G29630 | gbM  | UM   | gbM  | UM   | UM   | UM   | mCHH | UM   |

|           |      |      |      |      |      |      |      |      |
|-----------|------|------|------|------|------|------|------|------|
| AT1G29640 | UM   |
| AT1G29660 | UM   |
| AT1G29670 | UM   |
| AT1G29680 | UM   |
| AT1G29690 | UM   |
| AT1G29700 | gbM  | gbM  | gbM  | UM   | gbM  | gbM  | gbM  | gbM  |
| AT1G29710 | UM   |
| AT1G29720 | UM   | UM   | UM   | UM   | UM   | UM   | mCHH | UM   |
| AT1G29730 | gbM  |
| AT1G29740 | UM   |
| AT1G29750 | gbM  | mCHH | gbM  | gbM  | gbM  | gbM  | mCHH | gbM  |
| AT1G29760 | UM   |
| AT1G29770 | gbM  |
| AT1G29780 | gbM  | UM   |
| AT1G29790 | UM   |
| AT1G29800 | gbM  |
| AT1G29810 | UM   |
| AT1G29820 | gbM  |
| AT1G29830 | UM   |
| AT1G29840 | UM   |
| AT1G29850 | UM   |
| AT1G29860 | UM   | UM   | UM   | UM   | UM   | UM   | mCHH | UM   |
| AT1G29870 | UM   |
| AT1G29880 | UM   |
| AT1G29890 | UM   | UM   | UM   | UM   | UM   | UM   | mCHH | UM   |
| AT1G29900 | gbM  |
| AT1G29910 | gbM  | gbM  | UM   | gbM  | gbM  | gbM  | gbM  | UM   |
| AT1G29920 | UM   |
| AT1G29930 | UM   |
| AT1G29940 | gbM  |
| AT1G29950 | UM   |
| AT1G29951 | UM   |
| AT1G29952 | UM   |
| AT1G29960 | UM   |
| AT1G29962 | UM   |
| AT1G29965 | UM   |
| AT1G29970 | UM   |
| AT1G29980 | UM   |
| AT1G29990 | UM   |
| AT1G30000 | gbM  | gbM  | gbM  | UM   | gbM  | gbM  | gbM  | UM   |
| AT1G30010 | UM   | UM   | UM   | UM   | UM   | UM   | mCHH | UM   |
| AT1G30016 | UM   |
| AT1G30020 | UM   |
| AT1G30040 | UM   |
| AT1G30050 | UM   |
| AT1G30060 | mCHH | mCHH | mCHH | mCHG | mCHH | mCHG | mCHH | mCHH |
| AT1G30070 | UM   |
| AT1G30080 | UM   |

|           |     |      |     |     |     |     |      |     |
|-----------|-----|------|-----|-----|-----|-----|------|-----|
| AT1G30090 | gbM | gbM  | gbM | gbM | gbM | gbM | gbM  | gbM |
| AT1G30100 | UM  | UM   | UM  | UM  | UM  | UM  | UM   | UM  |
| AT1G30110 | UM  | UM   | UM  | UM  | UM  | UM  | UM   | UM  |
| AT1G30120 | UM  | UM   | UM  | UM  | UM  | UM  | UM   | UM  |
| AT1G30130 | UM  | UM   | UM  | UM  | UM  | UM  | UM   | UM  |
| AT1G30135 | UM  | UM   | UM  | UM  | UM  | UM  | UM   | UM  |
| AT1G30140 | UM  | UM   | UM  | UM  | UM  | UM  | UM   | UM  |
| AT1G30160 | UM  | UM   | UM  | UM  | UM  | UM  | UM   | UM  |
| AT1G30170 | UM  | UM   | UM  | UM  | UM  | UM  | UM   | UM  |
| AT1G30190 | UM  | UM   | UM  | UM  | UM  | UM  | UM   | UM  |
| AT1G30200 | UM  | UM   | UM  | UM  | UM  | UM  | UM   | UM  |
| AT1G30210 | UM  | UM   | UM  | UM  | UM  | UM  | UM   | UM  |
| AT1G30220 | UM  | UM   | UM  | UM  | UM  | UM  | UM   | UM  |
| AT1G30230 | UM  | UM   | UM  | UM  | UM  | UM  | UM   | UM  |
| AT1G30240 | gbM | gbM  | gbM | gbM | gbM | gbM | gbM  | gbM |
| AT1G30250 | UM  | UM   | UM  | UM  | UM  | UM  | UM   | UM  |
| AT1G30260 | UM  | UM   | UM  | UM  | UM  | UM  | UM   | UM  |
| AT1G30270 | UM  | UM   | UM  | UM  | UM  | UM  | UM   | UM  |
| AT1G30280 | UM  | UM   | UM  | UM  | UM  | UM  | mCHH | UM  |
| AT1G30290 | UM  | UM   | UM  | UM  | UM  | UM  | gbM  | UM  |
| AT1G30300 | UM  | UM   | UM  | UM  | UM  | UM  | UM   | UM  |
| AT1G30320 | UM  | UM   | UM  | UM  | UM  | UM  | UM   | UM  |
| AT1G30330 | gbM | gbM  | gbM | gbM | gbM | gbM | mCHH | gbM |
| AT1G30350 | UM  | UM   | UM  | UM  | UM  | UM  | UM   | UM  |
| AT1G30360 | gbM | gbM  | gbM | gbM | gbM | UM  | gbM  | gbM |
| AT1G30370 | UM  | UM   | UM  | UM  | UM  | UM  | UM   | UM  |
| AT1G30380 | UM  | UM   | UM  | UM  | UM  | UM  | UM   | UM  |
| AT1G30400 | gbM | gbM  | gbM | UM  | UM  | UM  | mCHH | UM  |
| AT1G30410 | gbM | mCHH | gbM | gbM | gbM | gbM | mCHH | gbM |
| AT1G30420 | gbM | mCHH | gbM | gbM | gbM | gbM | mCHH | gbM |
| AT1G30440 | gbM | gbM  | gbM | gbM | gbM | gbM | gbM  | gbM |
| AT1G30450 | gbM | mCHH | gbM | gbM | gbM | gbM | gbM  | gbM |
| AT1G30455 | UM  | UM   | UM  | UM  | UM  | UM  | UM   | UM  |
| AT1G30460 | gbM | gbM  | UM  | UM  | UM  | UM  | gbM  | UM  |
| AT1G30470 | gbM | gbM  | gbM | gbM | gbM | gbM | mCHH | gbM |
| AT1G30473 | UM  | UM   | UM  | UM  | UM  | UM  | UM   | UM  |
| AT1G30475 | UM  | UM   | UM  | UM  | UM  | UM  | UM   | UM  |
| AT1G30480 | UM  | UM   | UM  | UM  | UM  | UM  | UM   | UM  |
| AT1G30490 | gbM | gbM  | gbM | UM  | UM  | UM  | mCHH | UM  |
| AT1G30500 | UM  | UM   | UM  | UM  | UM  | UM  | UM   | UM  |
| AT1G30510 | gbM | gbM  | UM  | gbM | gbM | gbM | gbM  | gbM |
| AT1G30515 | UM  | UM   | UM  | UM  | UM  | UM  | UM   | UM  |
| AT1G30520 | UM  | UM   | UM  | UM  | UM  | UM  | gbM  | UM  |
| AT1G30530 | UM  | UM   | UM  | UM  | UM  | UM  | UM   | UM  |
| AT1G30540 | UM  | UM   | UM  | UM  | UM  | UM  | UM   | UM  |
| AT1G30550 | UM  | UM   | UM  | UM  | UM  | UM  | UM   | UM  |
| AT1G30560 | UM  | UM   | UM  | UM  | UM  | UM  | UM   | UM  |
| AT1G30570 | gbM | gbM  | gbM | UM  | gbM | UM  | gbM  | UM  |

|           |      |      |      |      |      |      |      |      |
|-----------|------|------|------|------|------|------|------|------|
| AT1G30580 | UM   |
| AT1G30590 | UM   | gbM  | UM   | UM   | UM   | UM   | mCHH | UM   |
| AT1G30600 | gbM  |
| AT1G30610 | UM   | mCHG | UM   | UM   | UM   | UM   | mCHH | UM   |
| AT1G30620 | UM   |
| AT1G30630 | UM   |
| AT1G30640 | gbM  | gbM  | gbM  | UM   | UM   | gbM  | gbM  | UM   |
| AT1G30650 | UM   |
| AT1G30660 | UM   |
| AT1G30670 | UM   |
| AT1G30680 | gbM  |
| AT1G30690 | gbM  | gbM  | gbM  | gbM  | gbM  | gbM  | mCHG | gbM  |
| AT1G30700 | UM   |
| AT1G30710 | UM   |
| AT1G30720 | UM   |
| AT1G30730 | UM   |
| AT1G30740 | UM   |
| AT1G30750 | UM   |
| AT1G30755 | UM   | gbM  | UM   | UM   | UM   | UM   | gbM  | UM   |
| AT1G30757 | UM   |
| AT1G30760 | UM   |
| AT1G30780 | mCHH | mCHG |
| AT1G30790 | UM   |
| AT1G30795 | UM   |
| AT1G30800 | UM   |
| AT1G30810 | gbM  | gbM  | gbM  | gbM  | gbM  | gbM  | mCHH | gbM  |
| AT1G30814 | UM   |
| AT1G30820 | gbM  | gbM  | gbM  | gbM  | gbM  | UM   | mCHH | gbM  |
| AT1G30825 | gbM  | gbM  | gbM  | gbM  | UM   | UM   | gbM  | UM   |
| AT1G30840 | UM   |
| AT1G30845 | UM   |
| AT1G30850 | UM   |
| AT1G30860 | UM   |
| AT1G30870 | gbM  | UM   | UM   | UM   | UM   | UM   | gbM  | UM   |
| AT1G30880 | UM   |
| AT1G30890 | UM   |
| AT1G30900 | UM   |
| AT1G30910 | UM   |
| AT1G30920 | UM   |
| AT1G30925 | UM   |
| AT1G30930 | UM   |
| AT1G30950 | UM   |
| AT1G30960 | UM   |
| AT1G30970 | UM   |
| AT1G30972 | mCHH | mCHH | mCHH | mCHG | mCHG | mCHG | mCHH | mCHG |
| AT1G30974 | mCHH | mCHH | mCHH | mCHH | mCHG | mCHH | mCHH | mCHH |
| AT1G30990 | UM   |
| AT1G31000 | UM   |



|           |      |      |      |      |      |      |      |      |
|-----------|------|------|------|------|------|------|------|------|
| AT1G31500 | UM   | UM   | UM   | gbM  | UM   | UM   | UM   | UM   |
| AT1G31510 | UM   |
| AT1G31520 | UM   |
| AT1G31530 | UM   |
| AT1G31540 | UM   | UM   | UM   | UM   | UM   | UM   | mCHH | UM   |
| AT1G31550 | UM   |
| AT1G31580 | UM   |
| AT1G31600 | gbM  | mCHH | gbM  | gbM  | gbM  | gbM  | mCHH | gbM  |
| AT1G31620 | UM   |
| AT1G31630 | mCHH | mCHH | mCHH | mCHH | mCHG | mCHH | mCHH | mCHG |
| AT1G31640 | mCHH |
| AT1G31650 | gbM  | gbM  | gbM  | gbM  | gbM  | gbM  | mCHH | gbM  |
| AT1G31660 | UM   |
| AT1G31670 | UM   |
| AT1G31690 | UM   |
| AT1G31710 | UM   |
| AT1G31720 | UM   |
| AT1G31730 | gbM  | gbM  | UM   | UM   | gbM  | UM   | UM   | UM   |
| AT1G31740 | mCHH | mCHH | mCHH | mCHG | mCHG | mCHG | mCHH | mCHG |
| AT1G31750 | mCHH | gbM  | gbM  | UM   | UM   | UM   | mCHH | UM   |
| AT1G31760 | UM   |
| AT1G31770 | UM   |
| AT1G31772 | UM   |
| AT1G31780 | UM   | UM   | UM   | UM   | UM   | UM   | gbM  | UM   |
| AT1G31790 | UM   |
| AT1G31800 | UM   | UM   | UM   | UM   | UM   | UM   | mCHH | UM   |
| AT1G31810 | gbM  | gbM  | gbM  | gbM  | gbM  | gbM  | mCHH | gbM  |
| AT1G31812 | UM   |
| AT1G31814 | UM   |
| AT1G31817 | UM   | gbM  | UM   | UM   | UM   | UM   | mCHH | UM   |
| AT1G31820 | UM   |
| AT1G31830 | UM   | gbM  | UM   | UM   | UM   | UM   | gbM  | UM   |
| AT1G31835 | UM   |
| AT1G31840 | UM   |
| AT1G31850 | gbM  |
| AT1G31860 | UM   |
| AT1G31870 | gbM  |
| AT1G31875 | UM   |
| AT1G31880 | UM   |
| AT1G31885 | UM   |
| AT1G31910 | gbM  | gbM  | UM   | gbM  | gbM  | gbM  | gbM  | gbM  |
| AT1G31920 | UM   |
| AT1G31930 | gbM  |
| AT1G31940 | UM   |
| AT1G31950 | UM   |
| AT1G31960 | mCHH |
| AT1G31970 | UM   | mCHH | UM   | UM   | UM   | UM   | UM   | UM   |
| AT1G31990 | UM   | mCHH | UM   | UM   | UM   | UM   | mCHH | UM   |

|           |      |      |      |      |      |      |      |         |
|-----------|------|------|------|------|------|------|------|---------|
| AT1G32000 | mCHH | mCHH | mCHH | mCHG | mCHH | mCHH | mCHH | mCHG    |
| AT1G32010 | mCHH    |
| AT1G32020 | mCHH    |
| AT1G32030 | UM      |
| AT1G32050 | UM      |
| AT1G32060 | UM      |
| AT1G32070 | UM      |
| AT1G32080 | UM   | UM   | UM   | UM   | UM   | UM   | mCHH | UM      |
| AT1G32090 | gbM  | gbM  | gbM  | UM   | gbM  | UM   | gbM  | UM      |
| AT1G32100 | UM      |
| AT1G32120 | UM   | gbM  | UM   | UM   | UM   | UM   | mCHG | UM      |
| AT1G32130 | gbM  | mCHH | gbM  | gbM  | UM   | gbM  | gbM  | gbM     |
| AT1G32140 | UM   | mCHH | mCHH | UM   | UM   | UM   | UM   | UM      |
| AT1G32150 | gbM  | gbM  | gbM  | UM   | UM   | gbM  | gbM  | gbM     |
| AT1G32160 | gbM     |
| AT1G32170 | UM      |
| AT1G32180 | UM      |
| AT1G32190 | UM   | mCHH | UM   | UM   | UM   | UM   | mCHH | UM      |
| AT1G32200 | UM      |
| AT1G32210 | UM      |
| AT1G32220 | UM   | UM   | UM   | UM   | UM   | UM   | gbM  | UM      |
| AT1G32225 | gbM  | mCHG | gbM  | UM   | UM   | gbM  | mCHG | unknown |
| AT1G32230 | gbM     |
| AT1G32240 | UM      |
| AT1G32250 | UM      |
| AT1G32260 | gbM     |
| AT1G32270 | mCHH    |
| AT1G32280 | UM      |
| AT1G32290 | UM      |
| AT1G32300 | UM   | mCHH | UM   | UM   | UM   | UM   | UM   | UM      |
| AT1G32310 | UM      |
| AT1G32320 | UM      |
| AT1G32330 | gbM  | UM      |
| AT1G32337 | mCHH | mCHG    |
| AT1G32340 | UM   | UM   | UM   | UM   | UM   | UM   | mCHH | UM      |
| AT1G32350 | UM      |
| AT1G32360 | UM      |
| AT1G32361 | UM   | gbM  | UM   | UM   | UM   | gbM  | mCHH | UM      |
| AT1G32370 | UM      |
| AT1G32375 | UM      |
| AT1G32380 | UM   | UM   | UM   | UM   | UM   | UM   | mCHH | UM      |
| AT1G32400 | UM      |
| AT1G32410 | UM      |
| AT1G32415 | gbM     |
| AT1G32420 | UM      |
| AT1G32430 | mCHH | mCHH | mCHH | UM   | UM   | UM   | mCHH | mCHG    |
| AT1G32440 | gbM  | UM      |
| AT1G32450 | gbM  | gbM  | gbM  | gbM  | gbM  | gbM  | mCHH | gbM     |







|           |      |      |      |      |      |      |      |      |
|-----------|------|------|------|------|------|------|------|------|
| AT1G33590 | UM   |
| AT1G33600 | UM   |
| AT1G33607 | mCHH | mCHH | mCHH | mCHG | UM   | UM   | mCHH | mCHH |
| AT1G33610 | UM   |
| AT1G33612 | UM   |
| AT1G33640 | UM   |
| AT1G33670 | UM   |
| AT1G33680 | gbM  | gbM  | gbM  | gbM  | UM   | gbM  | gbM  | UM   |
| AT1G33700 | gbM  | mCHG | gbM  | gbM  | gbM  | gbM  | mCHH | gbM  |
| AT1G33709 | UM   |
| AT1G33710 | UM   |
| AT1G33720 | UM   |
| AT1G33730 | UM   |
| AT1G33750 | UM   |
| AT1G33760 | UM   |
| AT1G33770 | gbM  | gbM  | gbM  | gbM  | UM   | UM   | gbM  | UM   |
| AT1G33780 | UM   |
| AT1G33790 | UM   |
| AT1G33800 | UM   |
| AT1G33810 | UM   |
| AT1G33811 | UM   |
| AT1G33820 | mCHH | mCHG | mCHH | UM   | UM   | UM   | mCHH | UM   |
| AT1G33830 | UM   |
| AT1G33840 | UM   |
| AT1G33850 | UM   |
| AT1G33860 | mCHH |
| AT1G33870 | UM   |
| AT1G33880 | UM   |
| AT1G33890 | gbM  | mCHH | UM   | UM   | UM   | UM   | gbM  | UM   |
| AT1G33900 | UM   |
| AT1G33910 | mCHH |
| AT1G33920 | UM   |
| AT1G33925 | UM   |
| AT1G33930 | UM   |
| AT1G33940 | UM   |
| AT1G33950 | mCHH | mCHH | mCHH | mCHH | mCHG | mCHG | mCHH | mCHG |
| AT1G33960 | mCHH | mCHH | mCHG | UM   | UM   | UM   | mCHH | UM   |
| AT1G33970 | UM   |
| AT1G33980 | gbM  |
| AT1G33990 | UM   |
| AT1G34000 | UM   |
| AT1G34010 | UM   |
| AT1G34020 | gbM  | gbM  | gbM  | UM   | UM   | UM   | gbM  | UM   |
| AT1G34030 | UM   |
| AT1G34040 | UM   |
| AT1G34041 | mCHH | mCHH | mCHH | mCHG | mCHH | mCHH | mCHH | mCHH |
| AT1G34042 | mCHH |
| AT1G34046 | UM   |



|           |      |      |      |         |         |      |      |         |
|-----------|------|------|------|---------|---------|------|------|---------|
| AT1G34550 | mCHH | mCHH | mCHH | gbM     | gbM     | gbM  | mCHH | gbM     |
| AT1G34560 | UM   | UM   | UM   | UM      | UM      | UM   | UM   | UM      |
| AT1G34570 | UM   | UM   | UM   | UM      | UM      | UM   | UM   | UM      |
| AT1G34575 | UM   | UM   | UM   | UM      | UM      | UM   | UM   | UM      |
| AT1G34580 | UM   | UM   | UM   | UM      | UM      | UM   | UM   | UM      |
| AT1G34630 | UM   | UM   | UM   | UM      | UM      | UM   | UM   | UM      |
| AT1G34640 | UM   | UM   | UM   | UM      | UM      | UM   | UM   | UM      |
| AT1G34650 | UM   | UM   | UM   | UM      | UM      | UM   | UM   | UM      |
| AT1G34670 | UM   | UM   | UM   | UM      | UM      | UM   | UM   | UM      |
| AT1G34750 | UM   | UM   | UM   | UM      | UM      | UM   | UM   | UM      |
| AT1G34760 | gbM  | gbM  | gbM  | gbM     | UM      | gbM  | gbM  | gbM     |
| AT1G34770 | UM   | UM   | UM   | UM      | UM      | UM   | UM   | UM      |
| AT1G34780 | gbM  | gbM  | UM   | UM      | UM      | UM   | gbM  | UM      |
| AT1G34790 | mCHH | mCHH | mCHH | UM      | UM      | UM   | mCHH | UM      |
| AT1G34792 | mCHH | mCHH | mCHH | mCHH    | mCHH    | gbM  | mCHH | mCHG    |
| AT1G34795 | mCHH | mCHH | mCHH | mCHH    | UM      | mCHG | mCHH | UM      |
| AT1G34800 | mCHH | UM   | UM   | UM      | UM      | UM   | UM   | UM      |
| AT1G34805 | UM   | gbM  | UM   | UM      | UM      | UM   | UM   | UM      |
| AT1G34810 | UM   | gbM  | UM   | UM      | UM      | UM   | UM   | unknown |
| AT1G34815 | UM   | gbM  | UM   | UM      | UM      | UM   | mCHH | UM      |
| AT1G34820 | gbM  | gbM  | gbM  | gbM     | UM      | UM   | gbM  | UM      |
| AT1G34825 | UM   | UM   | UM   | UM      | UM      | UM   | UM   | UM      |
| AT1G34830 | mCHG | mCHG | UM   | UM      | UM      | UM   | mCHH | unknown |
| AT1G34840 | UM   | UM   | UM   | unknown | unknown | UM   | UM   | unknown |
| AT1G34850 | UM   | UM   | UM   | unknown | UM      | UM   | UM   | unknown |
| AT1G34860 | mCHH | mCHH | mCHH | mCHH    | mCHH    | mCHH | mCHH | gbM     |
| AT1G34910 | mCHH | mCHH | mCHH | mCHH    | mCHH    | mCHH | mCHH | mCHH    |
| AT1G34930 | mCHH | mCHH | mCHH | mCHH    | gbM     | mCHH | mCHH | mCHH    |
| AT1G35030 | mCHH | mCHH | mCHH | mCHH    | mCHH    | mCHH | mCHH | mCHH    |
| AT1G35035 | mCHH | mCHH | mCHH | mCHH    | mCHH    | mCHH | mCHH | gbM     |
| AT1G35040 | mCHH | mCHH | mCHH | mCHH    | mCHH    | mCHH | mCHH | mCHG    |
| AT1G35140 | UM   | UM   | UM   | UM      | UM      | UM   | UM   | UM      |
| AT1G35150 | mCHH | mCHH | mCHH | mCHH    | mCHH    | mCHH | mCHH | mCHH    |
| AT1G35160 | UM   | UM   | UM   | UM      | UM      | UM   | UM   | UM      |
| AT1G35170 | UM   | UM   | UM   | UM      | UM      | UM   | UM   | UM      |
| AT1G35180 | UM   | UM   | UM   | UM      | UM      | UM   | UM   | UM      |
| AT1G35181 | UM   | UM   | UM   | UM      | UM      | UM   | UM   | UM      |
| AT1G35183 | UM   | UM   | UM   | UM      | UM      | UM   | UM   | UM      |
| AT1G35190 | UM   | mCHG | mCHG | UM      | UM      | UM   | mCHH | UM      |
| AT1G35210 | UM   | UM   | UM   | UM      | UM      | UM   | UM   | UM      |
| AT1G35220 | gbM  | gbM  | gbM  | gbM     | gbM     | gbM  | mCHH | gbM     |
| AT1G35230 | UM   | UM   | UM   | UM      | UM      | UM   | UM   | UM      |
| AT1G35240 | mCHH | mCHH | mCHH | mCHH    | mCHH    | mCHH | mCHH | mCHH    |
| AT1G35242 | mCHH | UM   | mCHH | UM      | UM      | UM   | mCHH | UM      |
| AT1G35250 | UM   | UM   | UM   | UM      | UM      | UM   | UM   | UM      |
| AT1G35255 | UM   | UM   | UM   | UM      | UM      | UM   | UM   | UM      |
| AT1G35260 | UM   | UM   | UM   | UM      | UM      | UM   | UM   | UM      |
| AT1G35290 | UM   | UM   | UM   | UM      | UM      | UM   | UM   | UM      |



|           |      |      |      |      |      |      |      |      |
|-----------|------|------|------|------|------|------|------|------|
| AT1G35880 | UM   |
| AT1G35890 | gbM  | gbM  | gbM  | gbM  | UM   | UM   | mCHH | UM   |
| AT1G35900 | mCHH | mCHH | mCHG | mCHH | mCHG | mCHG | mCHH | gbM  |
| AT1G35910 | UM   |
| AT1G36000 | mCHH | mCHH | mCHH | mCHH | mCHH | mCHG | mCHH | UM   |
| AT1G36020 | mCHH |
| AT1G36030 | mCHH |
| AT1G36050 | UM   |
| AT1G36060 | UM   |
| AT1G36070 | gbM  |
| AT1G36078 | mCHH |
| AT1G36095 | mCHH |
| AT1G36100 | mCHH |
| AT1G36150 | UM   |
| AT1G36160 | gbM  | mCHH | gbM  | gbM  | gbM  | gbM  | mCHH | gbM  |
| AT1G36180 | gbM  | mCHH | gbM  | gbM  | gbM  | gbM  | mCHH | gbM  |
| AT1G36230 | mCHH |
| AT1G36240 | mCHH |
| AT1G36272 | mCHH | mCHG |
| AT1G36280 | gbM  | gbM  | UM   | UM   | UM   | UM   | gbM  | UM   |
| AT1G36310 | UM   |
| AT1G36320 | gbM  | UM   |
| AT1G36340 | UM   |
| AT1G36370 | UM   |
| AT1G36380 | UM   |
| AT1G36390 | UM   |
| AT1G36510 | mCHH |
| AT1G36580 | mCHH | mCHH | mCHH | UM   | UM   | UM   | mCHH | UM   |
| AT1G36622 | mCHH | mCHH | mCHH | UM   | UM   | UM   | mCHH | UM   |
| AT1G36640 | UM   |
| AT1G36675 | mCHH |
| AT1G36730 | gbM  | UM   |
| AT1G36732 | UM   |
| AT1G36745 | mCHH | mCHG |
| AT1G36756 | mCHH |
| AT1G36920 | mCHH | mCHH | mCHH | mCHH | mCHG | mCHH | mCHH | mCHH |
| AT1G36922 | mCHH | mCHH | mCHH | UM   | UM   | UM   | mCHH | UM   |
| AT1G36925 | mCHH | mCHH | mCHH | mCHH | gbM  | mCHH | mCHH | mCHH |
| AT1G36940 | mCHH | mCHH | mCHH | mCHH | mCHH | UM   | mCHH | UM   |
| AT1G36942 | mCHH | mCHH | mCHH | mCHH | gbM  | mCHH | mCHH | gbM  |
| AT1G36950 | mCHH |
| AT1G36960 | mCHH | mCHH | mCHH | mCHH | mCHG | mCHH | mCHH | mCHG |
| AT1G36970 | mCHH |
| AT1G36980 | UM   |
| AT1G36990 | gbM  |
| AT1G37000 | mCHH |
| AT1G37007 | mCHH | mCHH | mCHH | mCHH | mCHG | mCHH | mCHH | mCHG |
| AT1G37010 | mCHH | mCHH | mCHH | UM   | UM   | UM   | mCHH | UM   |

|           |      |      |      |         |         |         |      |         |         |
|-----------|------|------|------|---------|---------|---------|------|---------|---------|
| AT1G37020 | mCHH | mCHH | mCHH | mCHH    | mCHH    | mCHH    | mCHH | mCHH    | mCHH    |
| AT1G37113 | mCHH | mCHH | mCHH | mCHH    | mCHH    | mCHH    | mCHH | mCHH    | mCHH    |
| AT1G37130 | UM   | UM   | UM   | UM      | UM      | UM      | UM   | UM      | UM      |
| AT1G37140 | UM   | UM   | UM   | UM      | UM      | UM      | UM   | UM      | UM      |
| AT1G37150 | UM   | UM   | UM   | UM      | UM      | UM      | UM   | UM      | UM      |
| AT1G37162 | mCHH | mCHH | mCHH | mCHH    | UM      | mCHH    | mCHH | mCHH    | UM      |
| AT1G38065 | UM   | UM   | UM   | unknown | unknown | unknown | UM   | unknown | unknown |
| AT1G38131 | UM   | UM   | UM   | UM      | UM      | UM      | UM   | UM      | UM      |
| AT1G38630 | mCHH | mCHH | mCHH | mCHH    | mCHH    | mCHH    | mCHH | mCHH    | mCHH    |
| AT1G38790 | mCHH | mCHH | mCHH | mCHH    | mCHH    | mCHH    | mCHH | mCHH    | mCHH    |
| AT1G38950 | mCHH | mCHH | mCHH | mCHH    | mCHH    | mCHH    | mCHH | mCHH    | mCHH    |
| AT1G40083 | mCHH | mCHH | mCHH | mCHH    | mCHH    | mCHH    | mCHH | mCHH    | mCHH    |
| AT1G40087 | mCHH | mCHH | mCHH | mCHH    | mCHH    | mCHH    | mCHH | mCHH    | mCHH    |
| AT1G40104 | mCHH | mCHH | mCHH | mCHH    | mCHH    | mCHH    | mCHH | mCHH    | mCHH    |
| AT1G40129 | UM   | mCHH | mCHG | UM      | UM      | UM      | mCHH | UM      | UM      |
| AT1G40390 | mCHH | mCHH | mCHH | mCHH    | mCHH    | mCHH    | mCHH | mCHH    | mCHH    |
| AT1G41820 | mCHH | mCHH | mCHH | mCHH    | mCHH    | mCHH    | mCHH | mCHH    | mCHH    |
| AT1G41830 | UM   | UM   | UM   | UM      | UM      | UM      | UM   | UM      | UM      |
| AT1G41875 | UM   | UM   | UM   | UM      | UM      | UM      | UM   | UM      | UM      |
| AT1G41880 | UM   | UM   | UM   | UM      | UM      | UM      | UM   | UM      | UM      |
| AT1G41920 | mCHH | mCHH | mCHH | mCHH    | mCHH    | mCHH    | mCHH | mCHH    | mCHH    |
| AT1G42080 | mCHH | mCHH | mCHH | mCHH    | mCHH    | mCHH    | mCHH | mCHH    | mCHH    |
| AT1G42190 | mCHH | mCHH | mCHH | mCHH    | mCHH    | mCHH    | mCHH | mCHH    | mCHG    |
| AT1G42430 | UM   | UM   | UM   | UM      | UM      | UM      | UM   | UM      | UM      |
| AT1G42440 | gbM  | gbM  | gbM  | gbM     | gbM     | gbM     | gbM  | mCHH    | gbM     |
| AT1G42470 | mCHH | mCHH | gbM  | gbM     | gbM     | gbM     | gbM  | mCHH    | gbM     |
| AT1G42480 | UM   | mCHH | UM   | UM      | UM      | UM      | UM   | UM      | UM      |
| AT1G42525 | mCHH | mCHH | mCHH | mCHH    | mCHH    | mCHH    | mCHH | mCHH    | mCHH    |
| AT1G42540 | gbM  | gbM  | gbM  | gbM     | gbM     | gbM     | gbM  | gbM     | gbM     |
| AT1G42550 | gbM  | gbM  | UM   | UM      | UM      | UM      | UM   | gbM     | UM      |
| AT1G42560 | UM   | UM   | UM   | UM      | UM      | UM      | UM   | UM      | UM      |
| AT1G42680 | mCHH | mCHH | mCHH | mCHH    | mCHH    | mCHH    | mCHH | mCHH    | mCHH    |
| AT1G42699 | mCHH | mCHH | mCHH | mCHG    | mCHH    | mCHH    | mCHH | mCHH    | mCHH    |
| AT1G42700 | mCHH | mCHH | mCHH | mCHH    | mCHG    | mCHH    | mCHH | mCHH    | mCHH    |
| AT1G42710 | mCHH | mCHH | mCHH | mCHH    | mCHH    | mCHH    | mCHH | mCHH    | mCHH    |
| AT1G42960 | UM   | UM   | UM   | UM      | UM      | UM      | UM   | UM      | UM      |
| AT1G42970 | UM   | UM   | UM   | UM      | UM      | UM      | UM   | UM      | UM      |
| AT1G42980 | mCHH | mCHH | gbM  | gbM     | gbM     | gbM     | gbM  | mCHH    | gbM     |
| AT1G42990 | UM   | UM   | UM   | UM      | UM      | UM      | UM   | UM      | UM      |
| AT1G43000 | UM   | UM   | UM   | UM      | UM      | UM      | UM   | UM      | UM      |
| AT1G43005 | UM   | UM   | UM   | UM      | UM      | UM      | UM   | UM      | UM      |
| AT1G43010 | UM   | UM   | UM   | UM      | UM      | UM      | UM   | UM      | UM      |
| AT1G43020 | gbM  | mCHH | mCHH | UM      | UM      | UM      | UM   | mCHH    | UM      |
| AT1G43040 | mCHH | mCHH | mCHH | mCHG    | gbM     | mCHG    | mCHH | mCHH    | mCHG    |
| AT1G43080 | mCHH | mCHH | mCHH | mCHH    | mCHH    | mCHH    | mCHH | mCHH    | mCHH    |
| AT1G43090 | mCHH | mCHH | mCHH | mCHG    | mCHG    | mCHH    | mCHH | mCHH    | mCHG    |
| AT1G43100 | mCHH | mCHH | mCHH | mCHG    | mCHG    | mCHG    | mCHH | mCHH    | mCHG    |
| AT1G43130 | gbM  | gbM  | UM   | gbM     | UM      | UM      | mCHH | UM      | UM      |



|           |      |      |      |      |      |      |      |      |
|-----------|------|------|------|------|------|------|------|------|
| AT1G43140 | UM   | UM   | UM   | UM   | UM   | UM   | mCHH | UM   |
| AT1G43145 | mCHH |
| AT1G43160 | UM   |
| AT1G43170 | UM   |
| AT1G43171 | UM   |
| AT1G43190 | UM   | UM   | UM   | UM   | gbM  | UM   | UM   | UM   |
| AT1G43245 | UM   | UM   | UM   | UM   | UM   | UM   | mCHH | UM   |
| AT1G43260 | mCHH |
| AT1G43310 | mCHH | mCHH | mCHH | mCHH | gbM  | mCHH | mCHH | gbM  |
| AT1G43320 | mCHH |
| AT1G43330 | mCHH | mCHH | mCHH | mCHG | UM   | mCHG | mCHH | mCHG |
| AT1G43415 | mCHH |
| AT1G43560 | UM   |
| AT1G43580 | gbM  | UM   | UM   | UM   | UM   | UM   | gbM  | UM   |
| AT1G43600 | UM   |
| AT1G43610 | UM   |
| AT1G43620 | gbM  |
| AT1G43624 | mCHH | gbM  |
| AT1G43630 | gbM  | gbM  | gbM  | UM   | gbM  | UM   | mCHH | UM   |
| AT1G43640 | UM   |
| AT1G43650 | UM   |
| AT1G43665 | mCHH |
| AT1G43666 | UM   |
| AT1G43667 | UM   |
| AT1G43670 | UM   |
| AT1G43680 | UM   |
| AT1G43690 | gbM  |
| AT1G43700 | UM   |
| AT1G43710 | gbM  | mCHH | UM   | UM   | UM   | UM   | gbM  | UM   |
| AT1G43720 | mCHH |
| AT1G43722 | mCHH |
| AT1G43730 | mCHH |
| AT1G43760 | mCHH |
| AT1G43770 | UM   | gbM  | UM   | UM   | UM   | gbM  | mCHH | UM   |
| AT1G43780 | mCHH | mCHH | mCHH | mCHG | mCHG | mCHG | mCHH | mCHG |
| AT1G43790 | UM   |
| AT1G43800 | UM   |
| AT1G43810 | UM   |
| AT1G43850 | gbM  |
| AT1G43860 | UM   | gbM  | UM   | UM   | UM   | UM   | UM   | UM   |
| AT1G43890 | gbM  | gbM  | gbM  | gbM  | UM   | gbM  | gbM  | UM   |
| AT1G43900 | UM   |
| AT1G43910 | UM   |
| AT1G43950 | mCHH |
| AT1G43970 | mCHH |
| AT1G43980 | UM   |
| AT1G44000 | UM   |
| AT1G44010 | UM   |





















|           |     |      |      |     |     |     |      |     |
|-----------|-----|------|------|-----|-----|-----|------|-----|
| AT1G50600 | gbM | UM   | UM   | gbM | UM  | UM  | gbM  | UM  |
| AT1G50603 | UM  | UM   | UM   | UM  | UM  | UM  | UM   | UM  |
| AT1G50610 | UM  | UM   | UM   | UM  | UM  | UM  | UM   | UM  |
| AT1G50620 | UM  | UM   | UM   | UM  | UM  | UM  | UM   | UM  |
| AT1G50630 | UM  | UM   | UM   | UM  | UM  | UM  | mCHH | UM  |
| AT1G50640 | UM  | UM   | UM   | UM  | UM  | UM  | UM   | UM  |
| AT1G50650 | UM  | UM   | UM   | UM  | UM  | UM  | UM   | UM  |
| AT1G50660 | gbM | mCHH | gbM  | gbM | gbM | gbM | mCHH | gbM |
| AT1G50670 | gbM | gbM  | gbM  | gbM | gbM | gbM | mCHH | gbM |
| AT1G50680 | UM  | UM   | UM   | UM  | UM  | UM  | UM   | UM  |
| AT1G50690 | UM  | UM   | UM   | UM  | UM  | UM  | UM   | UM  |
| AT1G50691 | UM  | UM   | UM   | UM  | UM  | UM  | UM   | UM  |
| AT1G50700 | UM  | UM   | UM   | UM  | UM  | UM  | UM   | UM  |
| AT1G50710 | gbM | gbM  | UM   | UM  | UM  | UM  | gbM  | UM  |
| AT1G50720 | UM  | UM   | UM   | UM  | UM  | UM  | UM   | UM  |
| AT1G50730 | gbM | gbM  | gbM  | gbM | gbM | gbM | mCHH | UM  |
| AT1G50732 | UM  | UM   | UM   | UM  | UM  | UM  | UM   | UM  |
| AT1G50740 | UM  | UM   | UM   | UM  | UM  | UM  | UM   | UM  |
| AT1G50750 | gbM | gbM  | gbM  | gbM | gbM | gbM | mCHH | UM  |
| AT1G50760 | UM  | UM   | UM   | UM  | UM  | UM  | UM   | UM  |
| AT1G50770 | UM  | UM   | UM   | UM  | UM  | UM  | mCHH | UM  |
| AT1G50780 | UM  | UM   | UM   | UM  | UM  | UM  | UM   | UM  |
| AT1G50790 | UM  | UM   | UM   | UM  | UM  | UM  | mCHH | UM  |
| AT1G50800 | UM  | UM   | mCHH | UM  | UM  | UM  | UM   | UM  |
| AT1G50820 | UM  | UM   | UM   | UM  | UM  | UM  | UM   | UM  |
| AT1G50830 | UM  | UM   | UM   | UM  | UM  | UM  | UM   | UM  |
| AT1G50840 | gbM | mCHH | gbM  | gbM | gbM | gbM | mCHH | gbM |
| AT1G50870 | UM  | UM   | UM   | UM  | UM  | UM  | mCHH | UM  |
| AT1G50880 | UM  | UM   | UM   | UM  | UM  | UM  | UM   | UM  |
| AT1G50890 | UM  | UM   | UM   | UM  | UM  | UM  | UM   | UM  |
| AT1G50900 | UM  | UM   | UM   | UM  | UM  | UM  | UM   | UM  |
| AT1G50910 | gbM | gbM  | gbM  | UM  | gbM | UM  | mCHH | gbM |
| AT1G50920 | UM  | UM   | UM   | UM  | UM  | UM  | UM   | UM  |
| AT1G50930 | UM  | UM   | UM   | UM  | UM  | UM  | UM   | UM  |
| AT1G50940 | UM  | UM   | UM   | UM  | UM  | UM  | UM   | UM  |
| AT1G50950 | gbM | mCHH | UM   | gbM | UM  | gbM | gbM  | gbM |
| AT1G50954 | UM  | UM   | UM   | UM  | UM  | UM  | UM   | UM  |
| AT1G50960 | UM  | UM   | UM   | UM  | UM  | UM  | mCHH | UM  |
| AT1G50970 | UM  | UM   | UM   | UM  | UM  | UM  | UM   | UM  |
| AT1G50980 | UM  | UM   | UM   | UM  | UM  | UM  | UM   | UM  |
| AT1G50990 | UM  | UM   | UM   | UM  | UM  | UM  | UM   | UM  |
| AT1G51000 | UM  | UM   | UM   | UM  | UM  | UM  | UM   | UM  |
| AT1G51010 | UM  | UM   | UM   | UM  | UM  | UM  | UM   | UM  |
| AT1G51020 | UM  | UM   | UM   | UM  | UM  | UM  | UM   | UM  |
| AT1G51030 | UM  | UM   | UM   | UM  | UM  | UM  | UM   | UM  |
| AT1G51035 | UM  | UM   | UM   | UM  | UM  | UM  | UM   | UM  |
| AT1G51040 | UM  | UM   | UM   | UM  | UM  | UM  | UM   | UM  |
| AT1G51055 | UM  | UM   | UM   | UM  | UM  | UM  | UM   | UM  |

|           |      |      |      |      |      |      |      |      |
|-----------|------|------|------|------|------|------|------|------|
| AT1G51060 | UM   |
| AT1G51070 | UM   |
| AT1G51080 | UM   | UM   | UM   | UM   | UM   | UM   | mCHH | UM   |
| AT1G51090 | UM   |
| AT1G51100 | UM   |
| AT1G51110 | UM   | UM   | UM   | UM   | UM   | UM   | mCHH | UM   |
| AT1G51120 | UM   |
| AT1G51130 | UM   |
| AT1G51140 | UM   |
| AT1G51150 | mCHH | mCHH | mCHH | UM   | UM   | UM   | UM   | UM   |
| AT1G51160 | UM   |
| AT1G51170 | UM   |
| AT1G51172 | mCHH |
| AT1G51190 | UM   |
| AT1G51200 | gbM  |
| AT1G51210 | UM   |
| AT1G51220 | UM   |
| AT1G51230 | UM   |
| AT1G51240 | UM   |
| AT1G51250 | UM   |
| AT1G51260 | UM   | UM   | UM   | UM   | UM   | UM   | mCHH | UM   |
| AT1G51270 | UM   |
| AT1G51290 | UM   |
| AT1G51300 | UM   |
| AT1G51310 | UM   | UM   | gbM  | UM   | UM   | UM   | mCHH | UM   |
| AT1G51320 | UM   |
| AT1G51330 | UM   |
| AT1G51340 | UM   | UM   | UM   | UM   | UM   | UM   | mCHH | UM   |
| AT1G51350 | gbM  | gbM  | UM   | UM   | UM   | UM   | gbM  | gbM  |
| AT1G51355 | UM   |
| AT1G51360 | UM   |
| AT1G51370 | UM   | UM   | UM   | UM   | UM   | UM   | mCHH | UM   |
| AT1G51380 | UM   |
| AT1G51390 | UM   |
| AT1G51400 | UM   |
| AT1G51402 | UM   |
| AT1G51405 | UM   | mCHH | UM   | UM   | UM   | UM   | mCHH | UM   |
| AT1G51410 | UM   |
| AT1G51420 | UM   |
| AT1G51430 | UM   |
| AT1G51440 | UM   |
| AT1G51450 | UM   |
| AT1G51460 | UM   |
| AT1G51470 | UM   |
| AT1G51480 | UM   | mCHH | UM   | UM   | UM   | UM   | mCHH | UM   |
| AT1G51490 | UM   | UM   | UM   | UM   | UM   | UM   | mCHH | UM   |
| AT1G51500 | UM   | UM   | UM   | UM   | UM   | UM   | mCHH | UM   |
| AT1G51510 | UM   |

|           |      |      |      |     |     |     |      |     |
|-----------|------|------|------|-----|-----|-----|------|-----|
| AT1G51520 | UM   | UM   | UM   | UM  | UM  | UM  | mCHH | UM  |
| AT1G51530 | UM   | UM   | UM   | UM  | UM  | UM  | UM   | UM  |
| AT1G51538 | UM   | mCHH | UM   | UM  | UM  | UM  | mCHH | UM  |
| AT1G51540 | UM   | UM   | UM   | UM  | UM  | UM  | UM   | UM  |
| AT1G51550 | gbM  | gbM  | UM   | UM  | UM  | UM  | gbM  | UM  |
| AT1G51560 | UM   | UM   | UM   | UM  | UM  | UM  | UM   | UM  |
| AT1G51570 | gbM  | gbM  | gbM  | gbM | UM  | UM  | gbM  | UM  |
| AT1G51580 | UM   | UM   | UM   | UM  | UM  | UM  | UM   | UM  |
| AT1G51590 | gbM  | gbM  | gbM  | gbM | gbM | gbM | gbM  | gbM |
| AT1G51600 | gbM  | gbM  | gbM  | gbM | gbM | gbM | gbM  | gbM |
| AT1G51610 | UM   | UM   | UM   | UM  | UM  | UM  | UM   | UM  |
| AT1G51620 | gbM  | gbM  | gbM  | gbM | gbM | gbM | mCHH | gbM |
| AT1G51630 | gbM  | UM   | UM   | UM  | UM  | UM  | UM   | UM  |
| AT1G51640 | gbM  | gbM  | gbM  | gbM | gbM | UM  | gbM  | UM  |
| AT1G51650 | UM   | UM   | UM   | UM  | UM  | UM  | UM   | UM  |
| AT1G51660 | UM   | UM   | UM   | UM  | UM  | UM  | UM   | UM  |
| AT1G51670 | UM   | UM   | UM   | UM  | UM  | UM  | UM   | UM  |
| AT1G51680 | UM   | UM   | UM   | UM  | UM  | UM  | UM   | UM  |
| AT1G51690 | gbM  | mCHH | gbM  | UM  | UM  | UM  | gbM  | gbM |
| AT1G51700 | UM   | UM   | UM   | UM  | UM  | UM  | UM   | UM  |
| AT1G51710 | UM   | UM   | UM   | UM  | UM  | UM  | UM   | UM  |
| AT1G51720 | gbM  | gbM  | gbM  | gbM | gbM | gbM | gbM  | gbM |
| AT1G51730 | UM   | UM   | gbM  | UM  | UM  | UM  | UM   | UM  |
| AT1G51740 | UM   | UM   | UM   | UM  | UM  | UM  | UM   | UM  |
| AT1G51745 | gbM  | gbM  | UM   | UM  | UM  | UM  | gbM  | UM  |
| AT1G51760 | UM   | UM   | UM   | UM  | UM  | UM  | UM   | UM  |
| AT1G51770 | UM   | UM   | UM   | UM  | UM  | UM  | UM   | UM  |
| AT1G51780 | UM   | UM   | UM   | UM  | UM  | UM  | UM   | UM  |
| AT1G51790 | UM   | UM   | UM   | UM  | UM  | UM  | UM   | UM  |
| AT1G51800 | UM   | UM   | UM   | UM  | UM  | UM  | UM   | UM  |
| AT1G51805 | UM   | UM   | UM   | UM  | UM  | UM  | mCHH | UM  |
| AT1G51810 | UM   | UM   | UM   | UM  | UM  | UM  | mCHH | UM  |
| AT1G51820 | UM   | UM   | UM   | UM  | UM  | UM  | mCHH | UM  |
| AT1G51823 | UM   | UM   | UM   | UM  | UM  | UM  | UM   | UM  |
| AT1G51830 | UM   | UM   | UM   | UM  | UM  | UM  | UM   | UM  |
| AT1G51840 | UM   | UM   | UM   | UM  | UM  | UM  | UM   | UM  |
| AT1G51850 | UM   | UM   | UM   | UM  | UM  | UM  | UM   | UM  |
| AT1G51860 | UM   | UM   | UM   | UM  | UM  | UM  | UM   | UM  |
| AT1G51870 | UM   | UM   | UM   | UM  | UM  | UM  | UM   | UM  |
| AT1G51880 | UM   | UM   | UM   | UM  | UM  | UM  | mCHH | UM  |
| AT1G51890 | UM   | UM   | UM   | UM  | UM  | UM  | mCHH | UM  |
| AT1G51900 | mCHH | mCHH | mCHH | UM  | UM  | UM  | mCHH | UM  |
| AT1G51910 | UM   | mCHH | UM   | UM  | UM  | UM  | mCHH | UM  |
| AT1G51913 | UM   | UM   | UM   | UM  | UM  | UM  | UM   | UM  |
| AT1G51915 | UM   | UM   | UM   | UM  | UM  | UM  | UM   | UM  |
| AT1G51920 | UM   | UM   | UM   | UM  | UM  | UM  | UM   | UM  |
| AT1G51930 | UM   | UM   | UM   | UM  | UM  | UM  | UM   | UM  |
| AT1G51940 | UM   | UM   | UM   | UM  | UM  | UM  | UM   | UM  |

|           |      |      |      |      |      |      |      |      |
|-----------|------|------|------|------|------|------|------|------|
| AT1G51950 | UM   |
| AT1G51960 | UM   |
| AT1G51965 | gbM  | gbM  | gbM  | UM   | UM   | gbM  | gbM  | UM   |
| AT1G51970 | UM   |
| AT1G51980 | gbM  |
| AT1G51990 | UM   |
| AT1G52000 | UM   | UM   | UM   | UM   | UM   | UM   | mCHH | UM   |
| AT1G52030 | UM   |
| AT1G52040 | UM   |
| AT1G52050 | UM   |
| AT1G52060 | UM   |
| AT1G52070 | UM   |
| AT1G52080 | gbM  |
| AT1G52100 | UM   |
| AT1G52110 | mCHH | mCHH | UM   | UM   | UM   | UM   | mCHH | UM   |
| AT1G52120 | UM   |
| AT1G52130 | UM   | UM   | UM   | UM   | UM   | UM   | mCHH | UM   |
| AT1G52140 | UM   |
| AT1G52150 | gbM  | mCHH | gbM  | gbM  | gbM  | gbM  | mCHH | gbM  |
| AT1G52155 | UM   |
| AT1G52160 | UM   |
| AT1G52180 | mCHH |
| AT1G52190 | UM   |
| AT1G52191 | UM   |
| AT1G52200 | UM   |
| AT1G52220 | UM   |
| AT1G52230 | UM   |
| AT1G52240 | UM   |
| AT1G52260 | UM   |
| AT1G52270 | UM   |
| AT1G52280 | UM   |
| AT1G52290 | UM   |
| AT1G52300 | UM   |
| AT1G52310 | gbM  |
| AT1G52315 | UM   |
| AT1G52320 | gbM  | mCHH | gbM  | UM   | UM   | UM   | mCHH | UM   |
| AT1G52325 | UM   |
| AT1G52330 | UM   |
| AT1G52340 | UM   |
| AT1G52342 | UM   |
| AT1G52343 | UM   |
| AT1G52360 | gbM  | mCHH | gbM  | gbM  | gbM  | gbM  | mCHH | gbM  |
| AT1G52370 | UM   |
| AT1G52380 | UM   | UM   | UM   | UM   | UM   | UM   | mCHH | UM   |
| AT1G52390 | UM   |
| AT1G52400 | UM   | UM   | UM   | UM   | UM   | UM   | mCHH | UM   |
| AT1G52410 | gbM  | gbM  | UM   | UM   | UM   | UM   | mCHH | UM   |
| AT1G52415 | UM   |

|           |     |      |     |     |     |     |      |     |
|-----------|-----|------|-----|-----|-----|-----|------|-----|
| AT1G52420 | gbM | gbM  | gbM | gbM | gbM | gbM | gbM  | gbM |
| AT1G52430 | UM  | UM   | UM  | UM  | UM  | UM  | mCHH | UM  |
| AT1G52440 | UM  | UM   | UM  | UM  | UM  | UM  | UM   | UM  |
| AT1G52450 | gbM | UM   | UM  | UM  | UM  | UM  | mCHH | gbM |
| AT1G52460 | UM  | UM   | UM  | UM  | UM  | UM  | mCHH | UM  |
| AT1G52470 | UM  | UM   | UM  | UM  | UM  | UM  | UM   | UM  |
| AT1G52490 | UM  | UM   | UM  | UM  | UM  | UM  | mCHH | UM  |
| AT1G52500 | UM  | UM   | UM  | UM  | UM  | UM  | UM   | UM  |
| AT1G52510 | UM  | UM   | UM  | UM  | UM  | UM  | UM   | UM  |
| AT1G52520 | gbM | gbM  | gbM | gbM | gbM | gbM | gbM  | gbM |
| AT1G52530 | gbM | gbM  | gbM | gbM | gbM | gbM | gbM  | gbM |
| AT1G52540 | UM  | UM   | UM  | UM  | UM  | UM  | UM   | UM  |
| AT1G52550 | UM  | UM   | UM  | UM  | UM  | UM  | UM   | UM  |
| AT1G52560 | UM  | UM   | UM  | UM  | UM  | UM  | UM   | UM  |
| AT1G52565 | UM  | UM   | UM  | UM  | UM  | UM  | UM   | UM  |
| AT1G52570 | gbM | mCHH | gbM | gbM | gbM | gbM | mCHH | gbM |
| AT1G52580 | gbM | gbM  | gbM | gbM | gbM | gbM | gbM  | gbM |
| AT1G52590 | UM  | UM   | UM  | UM  | UM  | UM  | UM   | UM  |
| AT1G52600 | UM  | UM   | UM  | UM  | UM  | UM  | UM   | UM  |
| AT1G52618 | UM  | UM   | UM  | UM  | UM  | UM  | UM   | UM  |
| AT1G52620 | UM  | UM   | UM  | UM  | UM  | UM  | mCHH | UM  |
| AT1G52630 | UM  | UM   | UM  | UM  | UM  | UM  | UM   | UM  |
| AT1G52640 | UM  | UM   | UM  | UM  | UM  | UM  | UM   | UM  |
| AT1G52650 | UM  | UM   | UM  | UM  | UM  | UM  | mCHH | UM  |
| AT1G52660 | gbM | gbM  | gbM | UM  | UM  | UM  | gbM  | UM  |
| AT1G52670 | UM  | UM   | UM  | UM  | UM  | UM  | UM   | UM  |
| AT1G52680 | UM  | UM   | UM  | UM  | UM  | UM  | UM   | UM  |
| AT1G52690 | UM  | UM   | UM  | UM  | UM  | UM  | UM   | UM  |
| AT1G52695 | UM  | UM   | UM  | UM  | UM  | UM  | UM   | UM  |
| AT1G52700 | UM  | UM   | UM  | UM  | UM  | UM  | UM   | UM  |
| AT1G52710 | UM  | UM   | UM  | UM  | UM  | UM  | UM   | UM  |
| AT1G52720 | UM  | UM   | UM  | UM  | UM  | UM  | UM   | UM  |
| AT1G52730 | UM  | UM   | UM  | UM  | UM  | UM  | UM   | UM  |
| AT1G52740 | UM  | UM   | UM  | UM  | UM  | UM  | UM   | UM  |
| AT1G52750 | UM  | UM   | UM  | UM  | UM  | UM  | UM   | UM  |
| AT1G52760 | UM  | UM   | UM  | UM  | UM  | UM  | UM   | UM  |
| AT1G52770 | UM  | UM   | UM  | UM  | UM  | UM  | UM   | UM  |
| AT1G52780 | gbM | gbM  | gbM | gbM | gbM | gbM | mCHH | gbM |
| AT1G52790 | UM  | UM   | UM  | UM  | UM  | UM  | UM   | UM  |
| AT1G52800 | UM  | UM   | UM  | UM  | UM  | UM  | UM   | UM  |
| AT1G52810 | UM  | UM   | UM  | UM  | UM  | UM  | UM   | UM  |
| AT1G52820 | gbM | gbM  | gbM | UM  | gbM | gbM | gbM  | gbM |
| AT1G52825 | UM  | UM   | UM  | UM  | UM  | UM  | UM   | UM  |
| AT1G52827 | UM  | UM   | UM  | UM  | UM  | UM  | UM   | UM  |
| AT1G52830 | UM  | UM   | UM  | UM  | UM  | UM  | UM   | UM  |
| AT1G52855 | UM  | UM   | UM  | UM  | UM  | UM  | UM   | UM  |
| AT1G52857 | UM  | UM   | UM  | UM  | UM  | UM  | UM   | UM  |
| AT1G52870 | UM  | UM   | UM  | UM  | UM  | UM  | UM   | UM  |

|           |      |      |      |      |      |      |      |      |
|-----------|------|------|------|------|------|------|------|------|
| AT1G52880 | UM   |
| AT1G52890 | UM   |
| AT1G52900 | UM   |
| AT1G52905 | mCHH | mCHH | mCHH | gbM  | UM   | mCHG | mCHH | UM   |
| AT1G52910 | UM   |
| AT1G52920 | UM   |
| AT1G52930 | UM   |
| AT1G52940 | mCHH | mCHH | mCHH | mCHG | mCHG | mCHH | mCHH | mCHG |
| AT1G52950 | mCHH |
| AT1G52970 | UM   |
| AT1G52980 | UM   |
| AT1G52990 | UM   |
| AT1G53000 | UM   |
| AT1G53010 | UM   |
| AT1G53023 | UM   |
| AT1G53025 | gbM  | gbM  | gbM  | gbM  | gbM  | gbM  | mCHH | gbM  |
| AT1G53030 | UM   |
| AT1G53035 | UM   |
| AT1G53039 | UM   |
| AT1G53040 | gbM  | gbM  | UM   | UM   | UM   | gbM  | gbM  | UM   |
| AT1G53050 | gbM  |
| AT1G53060 | UM   |
| AT1G53070 | UM   |
| AT1G53080 | UM   |
| AT1G53090 | UM   | gbM  | UM   | UM   | UM   | UM   | gbM  | UM   |
| AT1G53100 | UM   |
| AT1G53110 | UM   | UM   | UM   | UM   | UM   | UM   | mCHH | UM   |
| AT1G53120 | UM   |
| AT1G53130 | UM   |
| AT1G53140 | UM   |
| AT1G53160 | UM   |
| AT1G53163 | UM   |
| AT1G53165 | gbM  |
| AT1G53170 | UM   |
| AT1G53180 | UM   |
| AT1G53190 | gbM  |
| AT1G53200 | gbM  | gbM  | gbM  | UM   | UM   | gbM  | gbM  | UM   |
| AT1G53210 | UM   |
| AT1G53230 | UM   |
| AT1G53240 | UM   |
| AT1G53250 | mCHH | UM   |
| AT1G53260 | UM   |
| AT1G53265 | mCHH | gbM  |
| AT1G53270 | gbM  | gbM  | UM   | UM   | UM   | UM   | gbM  | UM   |
| AT1G53280 | UM   |
| AT1G53282 | UM   |
| AT1G53285 | UM   |
| AT1G53290 | UM   |



|           |      |      |     |     |     |     |      |     |
|-----------|------|------|-----|-----|-----|-----|------|-----|
| AT1G53300 | UM   | UM   | UM  | UM  | UM  | UM  | UM   | UM  |
| AT1G53310 | gbM  | gbM  | gbM | gbM | gbM | gbM | gbM  | gbM |
| AT1G53320 | UM   | UM   | UM  | UM  | UM  | UM  | UM   | UM  |
| AT1G53325 | UM   | UM   | UM  | UM  | UM  | UM  | UM   | UM  |
| AT1G53330 | UM   | mCHG | UM  | UM  | UM  | UM  | UM   | UM  |
| AT1G53340 | mCHH | mCHH | UM  | UM  | UM  | UM  | mCHH | UM  |
| AT1G53345 | UM   | UM   | UM  | UM  | UM  | UM  | UM   | UM  |
| AT1G53350 | UM   | UM   | UM  | UM  | UM  | UM  | UM   | UM  |
| AT1G53360 | UM   | UM   | UM  | UM  | UM  | UM  | UM   | UM  |
| AT1G53366 | UM   | UM   | UM  | UM  | UM  | UM  | UM   | UM  |
| AT1G53370 | UM   | UM   | UM  | UM  | UM  | UM  | UM   | UM  |
| AT1G53380 | UM   | gbM  | UM  | UM  | UM  | UM  | UM   | UM  |
| AT1G53390 | UM   | mCHH | UM  | UM  | UM  | UM  | mCHH | UM  |
| AT1G53400 | UM   | UM   | UM  | UM  | UM  | UM  | UM   | UM  |
| AT1G53420 | UM   | UM   | UM  | UM  | UM  | UM  | mCHH | UM  |
| AT1G53430 | UM   | UM   | UM  | UM  | UM  | UM  | mCHH | UM  |
| AT1G53440 | gbM  | gbM  | gbM | gbM | gbM | gbM | gbM  | gbM |
| AT1G53450 | UM   | UM   | UM  | UM  | UM  | UM  | mCHH | UM  |
| AT1G53460 | UM   | UM   | UM  | UM  | UM  | UM  | UM   | UM  |
| AT1G53470 | UM   | UM   | UM  | UM  | UM  | UM  | UM   | UM  |
| AT1G53480 | UM   | UM   | UM  | UM  | UM  | UM  | UM   | UM  |
| AT1G53490 | UM   | UM   | UM  | UM  | UM  | UM  | mCHH | UM  |
| AT1G53500 | gbM  | gbM  | gbM | gbM | gbM | gbM | gbM  | gbM |
| AT1G53510 | gbM  | gbM  | gbM | gbM | gbM | gbM | gbM  | gbM |
| AT1G53520 | UM   | UM   | UM  | UM  | UM  | UM  | UM   | UM  |
| AT1G53530 | UM   | UM   | UM  | UM  | UM  | UM  | UM   | UM  |
| AT1G53540 | UM   | UM   | UM  | UM  | UM  | UM  | UM   | UM  |
| AT1G53541 | UM   | UM   | UM  | UM  | UM  | UM  | UM   | UM  |
| AT1G53542 | UM   | UM   | UM  | UM  | UM  | UM  | UM   | UM  |
| AT1G53543 | UM   | UM   | UM  | UM  | UM  | UM  | UM   | UM  |
| AT1G53550 | UM   | UM   | UM  | UM  | UM  | UM  | UM   | UM  |
| AT1G53560 | UM   | UM   | UM  | UM  | UM  | UM  | UM   | UM  |
| AT1G53570 | UM   | UM   | UM  | UM  | UM  | UM  | UM   | UM  |
| AT1G53580 | UM   | UM   | UM  | UM  | UM  | UM  | UM   | UM  |
| AT1G53590 | mCHH | mCHH | gbM | gbM | UM  | UM  | mCHH | UM  |
| AT1G53600 | UM   | UM   | UM  | UM  | UM  | UM  | UM   | UM  |
| AT1G53610 | UM   | UM   | UM  | UM  | UM  | UM  | UM   | UM  |
| AT1G53620 | UM   | UM   | UM  | UM  | UM  | UM  | UM   | UM  |
| AT1G53625 | UM   | UM   | UM  | UM  | UM  | UM  | UM   | UM  |
| AT1G53633 | UM   | UM   | UM  | UM  | UM  | UM  | UM   | UM  |
| AT1G53635 | UM   | UM   | UM  | UM  | UM  | UM  | UM   | UM  |
| AT1G53640 | UM   | UM   | UM  | UM  | UM  | UM  | UM   | UM  |
| AT1G53645 | UM   | UM   | UM  | UM  | UM  | UM  | UM   | UM  |
| AT1G53650 | UM   | gbM  | UM  | UM  | UM  | UM  | UM   | UM  |
| AT1G53660 | UM   | UM   | UM  | UM  | UM  | UM  | UM   | UM  |
| AT1G53670 | UM   | UM   | UM  | UM  | UM  | UM  | UM   | UM  |
| AT1G53680 | UM   | mCHH | UM  | UM  | UM  | UM  | UM   | UM  |
| AT1G53690 | UM   | UM   | UM  | UM  | UM  | UM  | UM   | UM  |





|           |      |      |      |      |      |      |      |      |
|-----------|------|------|------|------|------|------|------|------|
| AT1G54580 | UM   |
| AT1G54590 | UM   |
| AT1G54610 | gbM  |
| AT1G54620 | UM   | UM   | UM   | UM   | UM   | UM   | mCHH | UM   |
| AT1G54630 | UM   |
| AT1G54640 | UM   |
| AT1G54650 | UM   |
| AT1G54680 | UM   |
| AT1G54690 | UM   |
| AT1G54700 | UM   |
| AT1G54710 | gbM  | gbM  | gbM  | gbM  | gbM  | gbM  | mCHH | gbM  |
| AT1G54720 | mCHH |
| AT1G54730 | UM   |
| AT1G54740 | UM   |
| AT1G54760 | mCHH | mCHG |
| AT1G54770 | UM   |
| AT1G54775 | mCHH | mCHG |
| AT1G54780 | UM   |
| AT1G54790 | UM   | UM   | UM   | UM   | UM   | UM   | mCHH | UM   |
| AT1G54820 | UM   |
| AT1G54830 | UM   |
| AT1G54840 | UM   |
| AT1G54850 | UM   | UM   | UM   | UM   | UM   | gbM  | UM   | UM   |
| AT1G54860 | UM   |
| AT1G54870 | UM   |
| AT1G54880 | UM   |
| AT1G54890 | UM   |
| AT1G54920 | UM   |
| AT1G54930 | UM   |
| AT1G54940 | UM   |
| AT1G54950 | UM   |
| AT1G54960 | UM   |
| AT1G54970 | UM   |
| AT1G54980 | UM   |
| AT1G54990 | UM   |
| AT1G55000 | UM   |
| AT1G55010 | UM   |
| AT1G55020 | gbM  | gbM  | UM   | UM   | UM   | UM   | gbM  | UM   |
| AT1G55030 | UM   |
| AT1G55040 | gbM  | gbM  | gbM  | UM   | UM   | gbM  | gbM  | gbM  |
| AT1G55045 | mCHH | mCHH | mCHH | mCHG | mCHH | mCHG | mCHH | mCHG |
| AT1G55050 | UM   | gbM  | UM   | UM   | UM   | UM   | UM   | UM   |
| AT1G55060 | UM   |
| AT1G55070 | UM   |
| AT1G55080 | UM   |
| AT1G55090 | UM   |
| AT1G55110 | UM   |
| AT1G55120 | UM   | mCHH | UM   | UM   | UM   | UM   | mCHH | UM   |

|           |      |      |     |     |     |     |      |     |
|-----------|------|------|-----|-----|-----|-----|------|-----|
| AT1G55130 | gbM  | gbM  | gbM | gbM | gbM | UM  | mCHH | gbM |
| AT1G55140 | UM   | UM   | UM  | UM  | UM  | UM  | UM   | UM  |
| AT1G55150 | gbM  | gbM  | gbM | gbM | gbM | gbM | gbM  | gbM |
| AT1G55152 | UM   | UM   | UM  | UM  | UM  | UM  | UM   | UM  |
| AT1G55160 | UM   | UM   | UM  | UM  | UM  | UM  | UM   | UM  |
| AT1G55170 | gbM  | gbM  | gbM | UM  | UM  | UM  | gbM  | gbM |
| AT1G55175 | gbM  | gbM  | gbM | UM  | gbM | gbM | gbM  | UM  |
| AT1G55180 | gbM  | gbM  | gbM | gbM | gbM | gbM | mCHH | gbM |
| AT1G55190 | UM   | UM   | UM  | UM  | UM  | UM  | UM   | UM  |
| AT1G55200 | UM   | UM   | UM  | UM  | UM  | UM  | UM   | UM  |
| AT1G55205 | UM   | UM   | UM  | UM  | UM  | UM  | UM   | UM  |
| AT1G55207 | UM   | UM   | UM  | UM  | UM  | UM  | UM   | UM  |
| AT1G55210 | UM   | UM   | UM  | UM  | UM  | UM  | UM   | UM  |
| AT1G55220 | UM   | UM   | UM  | UM  | UM  | UM  | UM   | UM  |
| AT1G55230 | UM   | UM   | UM  | UM  | UM  | UM  | UM   | UM  |
| AT1G55240 | UM   | mCHH | UM  | UM  | UM  | UM  | mCHH | UM  |
| AT1G55250 | gbM  | gbM  | gbM | UM  | UM  | gbM | gbM  | gbM |
| AT1G55260 | UM   | UM   | UM  | UM  | UM  | UM  | UM   | UM  |
| AT1G55265 | UM   | UM   | UM  | UM  | UM  | UM  | UM   | UM  |
| AT1G55270 | UM   | UM   | UM  | UM  | UM  | UM  | UM   | UM  |
| AT1G55280 | UM   | UM   | UM  | UM  | UM  | UM  | UM   | UM  |
| AT1G55290 | UM   | UM   | UM  | UM  | UM  | UM  | UM   | UM  |
| AT1G55300 | UM   | UM   | UM  | UM  | UM  | UM  | UM   | UM  |
| AT1G55310 | gbM  | gbM  | gbM | gbM | gbM | gbM | gbM  | gbM |
| AT1G55320 | UM   | UM   | UM  | UM  | UM  | UM  | gbM  | UM  |
| AT1G55325 | gbM  | mCHH | gbM | gbM | gbM | gbM | mCHH | gbM |
| AT1G55330 | UM   | UM   | UM  | UM  | UM  | UM  | UM   | UM  |
| AT1G55340 | UM   | UM   | UM  | UM  | UM  | UM  | UM   | UM  |
| AT1G55350 | gbM  | mCHH | gbM | gbM | gbM | gbM | mCHH | gbM |
| AT1G55360 | UM   | UM   | UM  | UM  | UM  | UM  | UM   | UM  |
| AT1G55365 | UM   | UM   | UM  | UM  | UM  | UM  | UM   | UM  |
| AT1G55370 | UM   | UM   | UM  | UM  | UM  | UM  | UM   | UM  |
| AT1G55380 | UM   | UM   | UM  | UM  | UM  | UM  | UM   | UM  |
| AT1G55390 | UM   | UM   | UM  | UM  | UM  | UM  | UM   | UM  |
| AT1G55420 | UM   | UM   | UM  | UM  | UM  | UM  | UM   | UM  |
| AT1G55430 | UM   | UM   | UM  | UM  | UM  | UM  | UM   | UM  |
| AT1G55440 | UM   | UM   | UM  | UM  | UM  | UM  | UM   | UM  |
| AT1G55450 | UM   | UM   | UM  | UM  | UM  | UM  | UM   | UM  |
| AT1G55460 | UM   | mCHH | UM  | UM  | UM  | UM  | mCHH | UM  |
| AT1G55475 | UM   | UM   | UM  | UM  | UM  | UM  | UM   | UM  |
| AT1G55480 | UM   | UM   | UM  | UM  | UM  | UM  | UM   | UM  |
| AT1G55490 | mCHH | gbM  | gbM | gbM | gbM | gbM | mCHH | gbM |
| AT1G55500 | UM   | UM   | UM  | UM  | UM  | UM  | UM   | UM  |
| AT1G55510 | UM   | UM   | UM  | UM  | UM  | UM  | mCHH | UM  |
| AT1G55520 | UM   | UM   | UM  | UM  | UM  | UM  | UM   | UM  |
| AT1G55530 | UM   | UM   | UM  | UM  | UM  | UM  | UM   | UM  |
| AT1G55535 | UM   | UM   | UM  | UM  | UM  | UM  | UM   | UM  |
| AT1G55540 | gbM  | mCHH | gbM | gbM | gbM | gbM | mCHH | gbM |

|           |      |      |      |      |      |      |      |      |
|-----------|------|------|------|------|------|------|------|------|
| AT1G55546 | UM   |
| AT1G55550 | UM   |
| AT1G55560 | UM   |
| AT1G55570 | UM   |
| AT1G55580 | UM   |
| AT1G55590 | gbM  | gbM  | gbM  | UM   | UM   | UM   | gbM  | gbM  |
| AT1G55600 | UM   |
| AT1G55610 | UM   |
| AT1G55615 | UM   |
| AT1G55620 | UM   | UM   | UM   | UM   | gbM  | UM   | gbM  | UM   |
| AT1G55630 | gbM  | mCHG | gbM  | gbM  | UM   | UM   | gbM  | UM   |
| AT1G55640 | UM   |
| AT1G55650 | mCHH | mCHH | UM   | UM   | UM   | UM   | UM   | UM   |
| AT1G55660 | UM   | UM   | UM   | UM   | UM   | UM   | mCHH | UM   |
| AT1G55670 | UM   |
| AT1G55675 | UM   |
| AT1G55680 | gbM  | gbM  | gbM  | UM   | gbM  | gbM  | gbM  | UM   |
| AT1G55690 | UM   |
| AT1G55700 | UM   |
| AT1G55710 | mCHH | mCHH | mCHH | mCHG | mCHG | mCHG | mCHH | mCHG |
| AT1G55720 | UM   | UM   | UM   | UM   | UM   | UM   | mCHH | UM   |
| AT1G55730 | gbM  | gbM  | gbM  | gbM  | gbM  | gbM  | mCHH | gbM  |
| AT1G55740 | UM   |
| AT1G55750 | gbM  |
| AT1G55760 | UM   |
| AT1G55770 | UM   |
| AT1G55790 | UM   |
| AT1G55800 | UM   |
| AT1G55805 | UM   |
| AT1G55810 | gbM  | UM   |
| AT1G55820 | gbM  | gbM  | gbM  | UM   | UM   | UM   | gbM  | UM   |
| AT1G55830 | UM   |
| AT1G55840 | UM   |
| AT1G55850 | UM   |
| AT1G55860 | gbM  | mCHH | gbM  | gbM  | gbM  | gbM  | mCHH | gbM  |
| AT1G55870 | UM   | mCHH | UM   | UM   | UM   | UM   | UM   | UM   |
| AT1G55880 | UM   |
| AT1G55890 | UM   |
| AT1G55900 | UM   |
| AT1G55910 | UM   |
| AT1G55915 | gbM  | gbM  | UM   | gbM  | UM   | UM   | gbM  | UM   |
| AT1G55920 | UM   |
| AT1G55928 | UM   |
| AT1G55930 | gbM  | gbM  | gbM  | gbM  | gbM  | UM   | mCHH | gbM  |
| AT1G55940 | UM   | UM   | UM   | UM   | UM   | UM   | mCHH | UM   |
| AT1G55950 | mCHH | mCHH | mCHH | mCHG | mCHG | mCHG | mCHH | mCHG |
| AT1G55960 | UM   |
| AT1G55970 | gbM  | mCHH | gbM  | gbM  | gbM  | gbM  | mCHH | gbM  |

















|           |      |      |      |      |      |      |      |      |
|-----------|------|------|------|------|------|------|------|------|
| AT1G60995 | gbM  |
| AT1G61000 | UM   |
| AT1G61010 | gbM  |
| AT1G61030 | gbM  | gbM  | UM   | UM   | UM   | UM   | mCHH | UM   |
| AT1G61040 | UM   | UM   | UM   | UM   | UM   | UM   | gbM  | UM   |
| AT1G61050 | UM   |
| AT1G61060 | UM   |
| AT1G61065 | UM   |
| AT1G61070 | UM   |
| AT1G61080 | UM   |
| AT1G61090 | UM   |
| AT1G61093 | UM   |
| AT1G61095 | UM   |
| AT1G61097 | UM   |
| AT1G61100 | gbM  | mCHH | gbM  | gbM  | gbM  | gbM  | mCHH | gbM  |
| AT1G61105 | UM   |
| AT1G61110 | UM   |
| AT1G61120 | UM   |
| AT1G61130 | UM   |
| AT1G61140 | gbM  | gbM  | gbM  | gbM  | gbM  | gbM  | mCHH | gbM  |
| AT1G61150 | gbM  | gbM  | gbM  | UM   | gbM  | gbM  | gbM  | gbM  |
| AT1G61160 | UM   |
| AT1G61165 | UM   |
| AT1G61170 | UM   |
| AT1G61180 | UM   |
| AT1G61190 | UM   |
| AT1G61200 | mCHH |
| AT1G61210 | gbM  | gbM  | gbM  | gbM  | gbM  | gbM  | mCHH | gbM  |
| AT1G61215 | gbM  |
| AT1G61230 | UM   | UM   | UM   | UM   | UM   | UM   | mCHH | UM   |
| AT1G61240 | UM   |
| AT1G61250 | UM   | gbM  | UM   | UM   | UM   | UM   | mCHH | UM   |
| AT1G61255 | UM   |
| AT1G61260 | UM   |
| AT1G61270 | UM   |
| AT1G61280 | UM   |
| AT1G61290 | UM   |
| AT1G61300 | UM   | UM   | UM   | UM   | UM   | UM   | mCHH | UM   |
| AT1G61310 | UM   |
| AT1G61320 | UM   |
| AT1G61330 | UM   |
| AT1G61340 | UM   |
| AT1G61350 | UM   | gbM  | UM   | UM   | UM   | UM   | UM   | UM   |
| AT1G61353 | UM   |
| AT1G61360 | gbM  | gbM  | gbM  | UM   | UM   | UM   | gbM  | UM   |
| AT1G61370 | gbM  | mCHH | gbM  | gbM  | gbM  | gbM  | gbM  | gbM  |
| AT1G61380 | gbM  |
| AT1G61390 | UM   |

|           |     |      |     |     |     |     |      |     |
|-----------|-----|------|-----|-----|-----|-----|------|-----|
| AT1G61400 | gbM | gbM  | gbM | gbM | gbM | gbM | gbM  | gbM |
| AT1G61410 | UM  | UM   | UM  | UM  | UM  | UM  | UM   | UM  |
| AT1G61415 | UM  | UM   | UM  | UM  | UM  | UM  | UM   | UM  |
| AT1G61420 | gbM | mCHH | gbM | gbM | gbM | gbM | gbM  | UM  |
| AT1G61430 | gbM | gbM  | gbM | gbM | gbM | gbM | gbM  | gbM |
| AT1G61440 | UM  | UM   | UM  | UM  | UM  | UM  | mCHH | UM  |
| AT1G61450 | UM  | UM   | UM  | UM  | UM  | UM  | UM   | UM  |
| AT1G61460 | UM  | UM   | UM  | UM  | UM  | UM  | mCHH | UM  |
| AT1G61470 | UM  | UM   | UM  | UM  | UM  | UM  | UM   | UM  |
| AT1G61475 | UM  | UM   | UM  | UM  | UM  | UM  | UM   | UM  |
| AT1G61480 | UM  | mCHH | UM  | UM  | UM  | UM  | mCHH | UM  |
| AT1G61490 | gbM | mCHH | gbM | gbM | gbM | gbM | mCHH | gbM |
| AT1G61500 | gbM | mCHG | gbM | gbM | gbM | gbM | gbM  | gbM |
| AT1G61520 | UM  | UM   | UM  | UM  | UM  | UM  | UM   | UM  |
| AT1G61540 | UM  | UM   | UM  | UM  | UM  | UM  | UM   | UM  |
| AT1G61550 | UM  | UM   | UM  | UM  | UM  | UM  | UM   | UM  |
| AT1G61560 | UM  | UM   | UM  | UM  | UM  | UM  | UM   | UM  |
| AT1G61563 | UM  | UM   | UM  | UM  | UM  | UM  | UM   | UM  |
| AT1G61566 | UM  | UM   | UM  | UM  | UM  | UM  | UM   | UM  |
| AT1G61570 | UM  | UM   | UM  | UM  | UM  | UM  | UM   | UM  |
| AT1G61575 | UM  | UM   | UM  | UM  | UM  | UM  | UM   | UM  |
| AT1G61580 | UM  | UM   | UM  | UM  | UM  | UM  | UM   | UM  |
| AT1G61590 | UM  | UM   | UM  | UM  | UM  | UM  | UM   | UM  |
| AT1G61600 | UM  | UM   | UM  | UM  | UM  | UM  | UM   | UM  |
| AT1G61610 | UM  | UM   | UM  | UM  | UM  | UM  | UM   | UM  |
| AT1G61620 | UM  | UM   | UM  | UM  | UM  | UM  | UM   | UM  |
| AT1G61630 | UM  | UM   | UM  | UM  | UM  | UM  | UM   | UM  |
| AT1G61640 | gbM | gbM  | gbM | gbM | gbM | gbM | mCHH | gbM |
| AT1G61660 | UM  | UM   | UM  | UM  | UM  | UM  | UM   | UM  |
| AT1G61667 | UM  | UM   | UM  | UM  | UM  | UM  | UM   | UM  |
| AT1G61670 | UM  | UM   | UM  | UM  | UM  | UM  | UM   | UM  |
| AT1G61680 | UM  | UM   | UM  | UM  | UM  | UM  | UM   | UM  |
| AT1G61688 | UM  | UM   | UM  | UM  | UM  | UM  | UM   | UM  |
| AT1G61690 | gbM | mCHH | gbM | gbM | gbM | gbM | mCHH | gbM |
| AT1G61700 | UM  | UM   | UM  | UM  | UM  | UM  | UM   | UM  |
| AT1G61710 | UM  | UM   | UM  | UM  | UM  | UM  | UM   | UM  |
| AT1G61720 | UM  | UM   | UM  | UM  | UM  | UM  | UM   | UM  |
| AT1G61730 | UM  | UM   | UM  | UM  | UM  | UM  | UM   | UM  |
| AT1G61740 | UM  | UM   | UM  | UM  | UM  | UM  | UM   | UM  |
| AT1G61750 | UM  | UM   | UM  | UM  | UM  | UM  | UM   | UM  |
| AT1G61760 | UM  | UM   | UM  | UM  | UM  | UM  | UM   | UM  |
| AT1G61770 | gbM | UM   | UM  | UM  | UM  | UM  | UM   | UM  |
| AT1G61780 | UM  | UM   | UM  | UM  | UM  | UM  | UM   | UM  |
| AT1G61790 | UM  | UM   | UM  | UM  | UM  | UM  | UM   | UM  |
| AT1G61795 | UM  | UM   | UM  | UM  | UM  | UM  | UM   | UM  |
| AT1G61800 | UM  | UM   | UM  | UM  | UM  | UM  | UM   | UM  |
| AT1G61810 | UM  | UM   | UM  | UM  | UM  | UM  | mCHH | UM  |
| AT1G61820 | UM  | UM   | UM  | UM  | UM  | UM  | UM   | UM  |

|           |      |      |      |     |     |     |      |      |
|-----------|------|------|------|-----|-----|-----|------|------|
| AT1G61840 | UM   | UM   | UM   | UM  | UM  | UM  | mCHH | UM   |
| AT1G61850 | gbM  | mCHH | gbM  | gbM | gbM | gbM | mCHH | gbM  |
| AT1G61860 | gbM  | gbM  | gbM  | gbM | gbM | gbM | gbM  | gbM  |
| AT1G61870 | UM   | UM   | UM   | UM  | UM  | UM  | UM   | UM   |
| AT1G61890 | UM   | UM   | UM   | UM  | UM  | UM  | UM   | UM   |
| AT1G61900 | gbM  | gbM  | gbM  | gbM | gbM | gbM | gbM  | gbM  |
| AT1G61920 | UM   | UM   | UM   | UM  | UM  | UM  | UM   | UM   |
| AT1G61930 | UM   | UM   | UM   | UM  | UM  | UM  | UM   | UM   |
| AT1G61940 | UM   | UM   | UM   | UM  | UM  | UM  | UM   | UM   |
| AT1G61950 | UM   | UM   | UM   | UM  | UM  | UM  | UM   | UM   |
| AT1G61960 | UM   | UM   | UM   | UM  | UM  | UM  | UM   | UM   |
| AT1G61970 | UM   | UM   | UM   | UM  | UM  | UM  | UM   | UM   |
| AT1G61980 | UM   | UM   | UM   | UM  | UM  | UM  | UM   | UM   |
| AT1G61990 | gbM  | gbM  | gbM  | gbM | UM  | gbM | gbM  | gbM  |
| AT1G62000 | UM   | UM   | UM   | UM  | UM  | UM  | UM   | UM   |
| AT1G62010 | UM   | UM   | UM   | UM  | UM  | UM  | UM   | UM   |
| AT1G62020 | gbM  | gbM  | gbM  | gbM | gbM | gbM | gbM  | gbM  |
| AT1G62030 | UM   | mCHH | UM   | UM  | UM  | UM  | UM   | UM   |
| AT1G62040 | UM   | UM   | UM   | UM  | UM  | UM  | UM   | UM   |
| AT1G62045 | UM   | UM   | UM   | UM  | UM  | UM  | UM   | UM   |
| AT1G62050 | UM   | UM   | UM   | UM  | UM  | UM  | UM   | UM   |
| AT1G62060 | UM   | UM   | UM   | UM  | UM  | UM  | UM   | UM   |
| AT1G62070 | UM   | UM   | UM   | UM  | UM  | UM  | UM   | UM   |
| AT1G62080 | UM   | UM   | UM   | UM  | UM  | UM  | UM   | UM   |
| AT1G62085 | UM   | UM   | UM   | UM  | UM  | UM  | UM   | UM   |
| AT1G62110 | UM   | UM   | UM   | UM  | UM  | UM  | UM   | UM   |
| AT1G62120 | UM   | UM   | UM   | UM  | UM  | UM  | UM   | UM   |
| AT1G62130 | gbM  | gbM  | gbM  | gbM | gbM | gbM | gbM  | gbM  |
| AT1G62150 | UM   | UM   | UM   | UM  | UM  | UM  | UM   | UM   |
| AT1G62160 | UM   | UM   | UM   | UM  | UM  | UM  | UM   | UM   |
| AT1G62170 | UM   | gbM  | UM   | UM  | UM  | UM  | gbM  | UM   |
| AT1G62180 | UM   | UM   | UM   | UM  | UM  | UM  | UM   | UM   |
| AT1G62181 | UM   | UM   | UM   | UM  | UM  | UM  | UM   | UM   |
| AT1G62190 | UM   | UM   | UM   | UM  | UM  | UM  | UM   | UM   |
| AT1G62200 | gbM  | gbM  | gbM  | gbM | gbM | gbM | gbM  | gbM  |
| AT1G62210 | UM   | UM   | UM   | UM  | UM  | UM  | UM   | UM   |
| AT1G62220 | UM   | UM   | UM   | UM  | UM  | UM  | UM   | UM   |
| AT1G62225 | UM   | UM   | UM   | UM  | UM  | UM  | UM   | UM   |
| AT1G62240 | UM   | UM   | UM   | UM  | UM  | UM  | UM   | UM   |
| AT1G62250 | gbM  | gbM  | gbM  | gbM | gbM | gbM | mCHH | gbM  |
| AT1G62260 | gbM  | gbM  | gbM  | UM  | UM  | UM  | gbM  | UM   |
| AT1G62262 | UM   | UM   | UM   | UM  | UM  | UM  | mCHH | UM   |
| AT1G62270 | mCHH | mCHH | mCHH | UM  | UM  | UM  | mCHH | mCHH |
| AT1G62280 | UM   | UM   | UM   | UM  | gbM | UM  | UM   | UM   |
| AT1G62290 | UM   | gbM  | UM   | UM  | UM  | UM  | mCHH | UM   |
| AT1G62300 | UM   | UM   | UM   | UM  | UM  | UM  | UM   | UM   |
| AT1G62301 | UM   | UM   | UM   | UM  | UM  | UM  | UM   | UM   |
| AT1G62305 | UM   | UM   | UM   | UM  | UM  | UM  | UM   | UM   |



|           |      |      |      |      |      |      |      |      |
|-----------|------|------|------|------|------|------|------|------|
| AT1G62310 | gbM  | mCHH | gbM  | gbM  | UM   | UM   | gbM  | gbM  |
| AT1G62320 | gbM  | mCHH | UM   | UM   | UM   | UM   | mCHH | UM   |
| AT1G62330 | UM   | UM   | UM   | UM   | UM   | UM   | mCHH | UM   |
| AT1G62333 | UM   |
| AT1G62340 | UM   |
| AT1G62350 | UM   |
| AT1G62360 | UM   | UM   | UM   | UM   | UM   | UM   | mCHH | UM   |
| AT1G62370 | UM   |
| AT1G62380 | UM   |
| AT1G62390 | gbM  |
| AT1G62400 | gbM  | gbM  | UM   | mCHG | UM   | UM   | gbM  | UM   |
| AT1G62410 | mCHH | mCHH | UM   | UM   | UM   | UM   | mCHH | UM   |
| AT1G62420 | UM   |
| AT1G62421 | UM   |
| AT1G62422 | UM   |
| AT1G62430 | UM   |
| AT1G62440 | UM   |
| AT1G62450 | UM   |
| AT1G62480 | UM   |
| AT1G62490 | UM   |
| AT1G62500 | UM   |
| AT1G62510 | UM   |
| AT1G62520 | UM   |
| AT1G62530 | UM   | gbM  | UM   | UM   | UM   | UM   | gbM  | UM   |
| AT1G62540 | UM   |
| AT1G62560 | UM   |
| AT1G62570 | UM   |
| AT1G62580 | mCHH | mCHH | mCHH | mCHG | mCHG | mCHG | mCHH | mCHG |
| AT1G62590 | UM   |
| AT1G62600 | UM   |
| AT1G62610 | UM   |
| AT1G62620 | UM   |
| AT1G62630 | UM   |
| AT1G62640 | UM   | gbM  | UM   | UM   | UM   | UM   | UM   | UM   |
| AT1G62660 | UM   |
| AT1G62670 | UM   | gbM  | gbM  | UM   | UM   | UM   | UM   | UM   |
| AT1G62680 | UM   | UM   | UM   | UM   | UM   | UM   | mCHH | UM   |
| AT1G62690 | UM   |
| AT1G62700 | UM   |
| AT1G62710 | UM   |
| AT1G62720 | UM   |
| AT1G62730 | UM   |
| AT1G62740 | UM   |
| AT1G62750 | gbM  | mCHH | gbM  | gbM  | UM   | UM   | mCHH | UM   |
| AT1G62760 | mCHH | mCHH | gbM  | mCHG | gbM  | mCHG | mCHH | mCHG |
| AT1G62770 | UM   |
| AT1G62780 | UM   |
| AT1G62790 | UM   |



|           |      |      |      |      |      |      |      |      |
|-----------|------|------|------|------|------|------|------|------|
| AT1G63205 | UM   |
| AT1G63206 | UM   |
| AT1G63210 | UM   | UM   | UM   | UM   | UM   | UM   | mCHH | UM   |
| AT1G63220 | UM   |
| AT1G63230 | UM   |
| AT1G63240 | UM   | mCHH | UM   | UM   | UM   | UM   | UM   | UM   |
| AT1G63245 | UM   |
| AT1G63250 | mCHH | mCHG | gbM  | gbM  | UM   | UM   | mCHH | UM   |
| AT1G63260 | UM   | gbM  | UM   | UM   | UM   | UM   | UM   | UM   |
| AT1G63270 | UM   | gbM  | gbM  | UM   | UM   | UM   | gbM  | UM   |
| AT1G63280 | UM   |
| AT1G63290 | UM   |
| AT1G63295 | UM   |
| AT1G63300 | mCHH | mCHH | mCHH | UM   | UM   | UM   | mCHH | UM   |
| AT1G63310 | UM   |
| AT1G63320 | UM   |
| AT1G63330 | UM   |
| AT1G63340 | UM   |
| AT1G63350 | UM   |
| AT1G63360 | UM   |
| AT1G63370 | UM   |
| AT1G63380 | UM   |
| AT1G63390 | UM   |
| AT1G63400 | UM   |
| AT1G63410 | UM   | UM   | UM   | UM   | UM   | UM   | mCHH | UM   |
| AT1G63420 | UM   | UM   | UM   | UM   | UM   | UM   | mCHH | UM   |
| AT1G63430 | gbM  | gbM  | UM   | gbM  | gbM  | gbM  | mCHH | gbM  |
| AT1G63440 | UM   |
| AT1G63450 | UM   |
| AT1G63460 | UM   |
| AT1G63470 | UM   |
| AT1G63480 | UM   |
| AT1G63490 | gbM  | gbM  | gbM  | gbM  | gbM  | gbM  | mCHH | gbM  |
| AT1G63500 | gbM  | mCHG | gbM  | gbM  | gbM  | gbM  | mCHH | gbM  |
| AT1G63520 | gbM  |
| AT1G63522 | UM   |
| AT1G63530 | UM   | UM   | UM   | UM   | UM   | UM   | mCHG | UM   |
| AT1G63535 | UM   |
| AT1G63540 | mCHH |
| AT1G63550 | UM   |
| AT1G63560 | UM   |
| AT1G63570 | UM   |
| AT1G63580 | UM   |
| AT1G63590 | UM   |
| AT1G63600 | UM   |
| AT1G63610 | UM   | UM   | UM   | UM   | UM   | UM   | gbM  | UM   |
| AT1G63630 | UM   |
| AT1G63640 | mCHG | mCHH | gbM  | gbM  | gbM  | gbM  | mCHH | gbM  |

|           |      |      |      |      |      |     |      |     |
|-----------|------|------|------|------|------|-----|------|-----|
| AT1G63650 | UM   | UM   | UM   | UM   | UM   | UM  | UM   | UM  |
| AT1G63660 | gbM  | gbM  | UM   | UM   | UM   | gbM | gbM  | gbM |
| AT1G63670 | mCHH | gbM  | gbM  | gbM  | gbM  | gbM | mCHH | UM  |
| AT1G63680 | UM   | UM   | UM   | UM   | UM   | UM  | UM   | UM  |
| AT1G63690 | gbM  | gbM  | gbM  | gbM  | gbM  | UM  | gbM  | UM  |
| AT1G63700 | gbM  | gbM  | gbM  | gbM  | gbM  | gbM | gbM  | gbM |
| AT1G63710 | UM   | UM   | UM   | UM   | UM   | UM  | UM   | UM  |
| AT1G63720 | UM   | UM   | UM   | UM   | UM   | UM  | UM   | UM  |
| AT1G63730 | UM   | UM   | UM   | UM   | UM   | UM  | mCHH | UM  |
| AT1G63740 | gbM  | gbM  | gbM  | gbM  | gbM  | gbM | mCHH | gbM |
| AT1G63750 | UM   | UM   | UM   | UM   | UM   | UM  | mCHH | UM  |
| AT1G63770 | gbM  | mCHH | gbM  | gbM  | gbM  | gbM | gbM  | gbM |
| AT1G63780 | UM   | UM   | UM   | UM   | UM   | UM  | UM   | UM  |
| AT1G63800 | UM   | UM   | UM   | UM   | UM   | UM  | UM   | UM  |
| AT1G63810 | gbM  | mCHH | gbM  | gbM  | gbM  | gbM | mCHH | gbM |
| AT1G63820 | UM   | UM   | UM   | UM   | UM   | UM  | mCHH | UM  |
| AT1G63830 | UM   | UM   | UM   | UM   | UM   | UM  | UM   | UM  |
| AT1G63840 | UM   | UM   | UM   | UM   | UM   | UM  | UM   | UM  |
| AT1G63850 | UM   | UM   | UM   | UM   | UM   | UM  | UM   | UM  |
| AT1G63855 | UM   | UM   | UM   | UM   | UM   | UM  | UM   | UM  |
| AT1G63860 | UM   | UM   | UM   | UM   | UM   | UM  | UM   | UM  |
| AT1G63870 | mCHH | mCHH | UM   | UM   | UM   | UM  | mCHH | UM  |
| AT1G63880 | UM   | UM   | UM   | UM   | UM   | UM  | mCHH | UM  |
| AT1G63900 | UM   | UM   | UM   | UM   | UM   | gbM | UM   | UM  |
| AT1G63910 | UM   | UM   | UM   | UM   | UM   | UM  | UM   | UM  |
| AT1G63930 | UM   | UM   | UM   | UM   | UM   | UM  | UM   | UM  |
| AT1G63940 | UM   | UM   | UM   | UM   | UM   | UM  | UM   | UM  |
| AT1G63950 | mCHH | mCHG | mCHG | mCHG | mCHG | UM  | mCHH | UM  |
| AT1G63960 | UM   | UM   | UM   | UM   | UM   | UM  | UM   | UM  |
| AT1G63970 | UM   | UM   | UM   | UM   | UM   | UM  | UM   | UM  |
| AT1G63980 | UM   | UM   | UM   | UM   | UM   | UM  | UM   | UM  |
| AT1G63990 | UM   | UM   | UM   | UM   | UM   | UM  | UM   | UM  |
| AT1G64000 | UM   | UM   | UM   | UM   | UM   | UM  | mCHH | UM  |
| AT1G64010 | UM   | UM   | UM   | UM   | UM   | UM  | UM   | UM  |
| AT1G64020 | UM   | UM   | UM   | UM   | UM   | UM  | UM   | UM  |
| AT1G64030 | UM   | UM   | UM   | UM   | UM   | UM  | UM   | UM  |
| AT1G64040 | UM   | UM   | UM   | UM   | UM   | UM  | gbM  | UM  |
| AT1G64050 | gbM  | gbM  | gbM  | gbM  | gbM  | gbM | gbM  | gbM |
| AT1G64060 | UM   | UM   | UM   | UM   | UM   | UM  | mCHH | UM  |
| AT1G64065 | UM   | UM   | UM   | UM   | UM   | UM  | UM   | UM  |
| AT1G64070 | UM   | UM   | UM   | UM   | UM   | UM  | UM   | UM  |
| AT1G64080 | UM   | UM   | UM   | UM   | UM   | UM  | UM   | UM  |
| AT1G64090 | UM   | UM   | UM   | UM   | UM   | UM  | UM   | UM  |
| AT1G64100 | UM   | UM   | UM   | UM   | UM   | UM  | UM   | UM  |
| AT1G64105 | UM   | UM   | UM   | UM   | UM   | UM  | UM   | UM  |
| AT1G64107 | UM   | UM   | UM   | UM   | UM   | UM  | UM   | UM  |
| AT1G64110 | UM   | UM   | UM   | UM   | UM   | UM  | mCHH | UM  |
| AT1G64130 | UM   | UM   | UM   | UM   | UM   | UM  | UM   | UM  |

|           |      |      |      |     |     |     |      |     |
|-----------|------|------|------|-----|-----|-----|------|-----|
| AT1G64140 | gbM  | gbM  | gbM  | gbM | gbM | gbM | gbM  | gbM |
| AT1G64142 | UM   | UM   | UM   | UM  | UM  | UM  | UM   | UM  |
| AT1G64150 | UM   | UM   | UM   | UM  | UM  | UM  | UM   | UM  |
| AT1G64160 | UM   | UM   | UM   | UM  | UM  | UM  | UM   | UM  |
| AT1G64170 | UM   | UM   | UM   | UM  | UM  | UM  | UM   | UM  |
| AT1G64180 | UM   | UM   | UM   | UM  | UM  | UM  | UM   | UM  |
| AT1G64185 | UM   | UM   | UM   | UM  | UM  | UM  | UM   | UM  |
| AT1G64190 | UM   | UM   | UM   | UM  | UM  | UM  | UM   | UM  |
| AT1G64195 | UM   | UM   | UM   | UM  | UM  | UM  | UM   | UM  |
| AT1G64200 | UM   | UM   | UM   | UM  | UM  | UM  | UM   | UM  |
| AT1G64210 | UM   | UM   | UM   | UM  | UM  | UM  | mCHH | UM  |
| AT1G64220 | UM   | UM   | UM   | UM  | UM  | UM  | UM   | UM  |
| AT1G64230 | UM   | UM   | UM   | UM  | UM  | UM  | UM   | UM  |
| AT1G64235 | UM   | UM   | UM   | UM  | UM  | UM  | UM   | UM  |
| AT1G64255 | UM   | UM   | UM   | UM  | UM  | UM  | UM   | UM  |
| AT1G64260 | UM   | UM   | UM   | UM  | UM  | UM  | UM   | UM  |
| AT1G64280 | UM   | gbM  | UM   | UM  | UM  | UM  | gbM  | UM  |
| AT1G64290 | UM   | UM   | UM   | UM  | UM  | UM  | mCHG | UM  |
| AT1G64295 | UM   | UM   | UM   | UM  | UM  | UM  | mCHH | UM  |
| AT1G64300 | gbM  | gbM  | gbM  | gbM | gbM | gbM | gbM  | gbM |
| AT1G64310 | UM   | UM   | UM   | UM  | UM  | UM  | UM   | UM  |
| AT1G64320 | mCHH | mCHH | mCHH | gbM | UM  | UM  | mCHH | UM  |
| AT1G64330 | mCHG | mCHH | mCHH | gbM | UM  | UM  | mCHH | UM  |
| AT1G64340 | UM   | UM   | UM   | UM  | UM  | UM  | mCHH | UM  |
| AT1G64350 | UM   | UM   | UM   | UM  | UM  | UM  | UM   | UM  |
| AT1G64355 | UM   | UM   | UM   | UM  | UM  | UM  | UM   | UM  |
| AT1G64360 | UM   | UM   | UM   | UM  | UM  | UM  | UM   | UM  |
| AT1G64370 | UM   | UM   | UM   | UM  | UM  | UM  | UM   | UM  |
| AT1G64380 | UM   | UM   | UM   | UM  | UM  | UM  | UM   | UM  |
| AT1G64385 | gbM  | gbM  | gbM  | gbM | gbM | gbM | gbM  | gbM |
| AT1G64390 | UM   | UM   | UM   | UM  | UM  | UM  | UM   | UM  |
| AT1G64400 | UM   | UM   | UM   | UM  | UM  | UM  | UM   | UM  |
| AT1G64405 | UM   | UM   | UM   | UM  | UM  | UM  | UM   | UM  |
| AT1G64430 | UM   | UM   | UM   | UM  | UM  | UM  | UM   | UM  |
| AT1G64440 | UM   | UM   | UM   | UM  | UM  | UM  | UM   | UM  |
| AT1G64450 | UM   | UM   | UM   | UM  | UM  | UM  | UM   | UM  |
| AT1G64460 | UM   | UM   | UM   | UM  | UM  | UM  | UM   | UM  |
| AT1G64470 | UM   | UM   | UM   | UM  | UM  | UM  | UM   | UM  |
| AT1G64480 | UM   | UM   | UM   | UM  | UM  | UM  | UM   | UM  |
| AT1G64490 | UM   | UM   | UM   | UM  | UM  | UM  | UM   | UM  |
| AT1G64500 | UM   | UM   | UM   | UM  | UM  | UM  | UM   | UM  |
| AT1G64510 | UM   | UM   | UM   | UM  | UM  | UM  | UM   | UM  |
| AT1G64520 | UM   | UM   | UM   | UM  | UM  | UM  | UM   | UM  |
| AT1G64530 | gbM  | gbM  | gbM  | gbM | gbM | UM  | gbM  | UM  |
| AT1G64540 | UM   | UM   | UM   | UM  | UM  | UM  | UM   | UM  |
| AT1G64550 | UM   | UM   | UM   | UM  | UM  | UM  | gbM  | UM  |
| AT1G64561 | UM   | UM   | UM   | UM  | UM  | UM  | UM   | UM  |
| AT1G64570 | gbM  | gbM  | gbM  | gbM | gbM | gbM | gbM  | gbM |

|           |      |      |      |     |     |     |      |     |
|-----------|------|------|------|-----|-----|-----|------|-----|
| AT1G64580 | UM   | UM   | UM   | UM  | UM  | UM  | UM   | UM  |
| AT1G64583 | UM   | gbM  | UM   | UM  | UM  | UM  | gbM  | UM  |
| AT1G64585 | UM   | UM   | UM   | UM  | UM  | UM  | UM   | UM  |
| AT1G64590 | UM   | UM   | UM   | UM  | UM  | UM  | UM   | UM  |
| AT1G64600 | UM   | mCHH | UM   | UM  | UM  | UM  | UM   | UM  |
| AT1G64610 | gbM  | gbM  | UM   | UM  | UM  | UM  | gbM  | UM  |
| AT1G64620 | UM   | UM   | UM   | UM  | UM  | UM  | UM   | UM  |
| AT1G64625 | UM   | UM   | UM   | UM  | UM  | UM  | UM   | UM  |
| AT1G64628 | UM   | UM   | UM   | UM  | UM  | UM  | UM   | UM  |
| AT1G64630 | UM   | UM   | UM   | UM  | UM  | UM  | UM   | UM  |
| AT1G64640 | UM   | UM   | UM   | UM  | UM  | UM  | UM   | UM  |
| AT1G64650 | UM   | mCHH | UM   | UM  | UM  | UM  | UM   | UM  |
| AT1G64660 | UM   | UM   | UM   | UM  | UM  | UM  | UM   | UM  |
| AT1G64670 | UM   | UM   | UM   | UM  | UM  | UM  | UM   | UM  |
| AT1G64680 | UM   | UM   | UM   | UM  | UM  | UM  | UM   | UM  |
| AT1G64690 | UM   | UM   | UM   | UM  | UM  | UM  | UM   | UM  |
| AT1G64700 | UM   | UM   | UM   | UM  | UM  | UM  | UM   | UM  |
| AT1G64710 | UM   | UM   | UM   | UM  | UM  | UM  | UM   | UM  |
| AT1G64720 | UM   | UM   | UM   | UM  | UM  | UM  | UM   | UM  |
| AT1G64740 | gbM  | gbM  | gbM  | UM  | UM  | UM  | gbM  | UM  |
| AT1G64750 | UM   | UM   | UM   | UM  | UM  | UM  | UM   | UM  |
| AT1G64760 | UM   | UM   | UM   | UM  | UM  | UM  | UM   | UM  |
| AT1G64770 | UM   | UM   | UM   | UM  | UM  | UM  | UM   | UM  |
| AT1G64780 | UM   | UM   | UM   | UM  | UM  | UM  | UM   | UM  |
| AT1G64790 | mCHH | mCHH | gbM  | gbM | gbM | gbM | mCHH | gbM |
| AT1G64800 | UM   | UM   | UM   | UM  | UM  | UM  | UM   | UM  |
| AT1G64810 | UM   | UM   | UM   | UM  | UM  | UM  | gbM  | UM  |
| AT1G64820 | UM   | UM   | UM   | UM  | UM  | UM  | UM   | UM  |
| AT1G64830 | UM   | UM   | UM   | UM  | UM  | UM  | UM   | UM  |
| AT1G64840 | gbM  | gbM  | gbM  | UM  | gbM | UM  | gbM  | gbM |
| AT1G64850 | UM   | UM   | UM   | UM  | UM  | UM  | UM   | UM  |
| AT1G64860 | gbM  | gbM  | gbM  | gbM | gbM | gbM | gbM  | gbM |
| AT1G64870 | UM   | UM   | UM   | UM  | UM  | UM  | UM   | UM  |
| AT1G64880 | UM   | UM   | UM   | UM  | UM  | UM  | UM   | UM  |
| AT1G64890 | gbM  | gbM  | UM   | UM  | UM  | UM  | mCHH | UM  |
| AT1G64900 | UM   | UM   | UM   | UM  | UM  | UM  | UM   | UM  |
| AT1G64910 | UM   | UM   | UM   | UM  | UM  | UM  | UM   | UM  |
| AT1G64920 | UM   | UM   | UM   | UM  | UM  | UM  | UM   | UM  |
| AT1G64930 | UM   | mCHH | UM   | UM  | UM  | UM  | mCHH | UM  |
| AT1G64940 | UM   | UM   | UM   | UM  | UM  | UM  | UM   | UM  |
| AT1G64950 | UM   | UM   | UM   | UM  | UM  | UM  | UM   | UM  |
| AT1G64960 | gbM  | mCHH | gbM  | gbM | gbM | gbM | mCHH | gbM |
| AT1G64970 | UM   | UM   | UM   | UM  | UM  | UM  | UM   | UM  |
| AT1G64980 | UM   | UM   | UM   | UM  | UM  | UM  | UM   | UM  |
| AT1G64990 | UM   | UM   | UM   | UM  | UM  | UM  | UM   | UM  |
| AT1G65000 | UM   | UM   | UM   | UM  | UM  | UM  | UM   | UM  |
| AT1G65010 | mCHH | mCHH | mCHH | gbM | gbM | gbM | mCHH | gbM |
| AT1G65020 | UM   | UM   | UM   | UM  | UM  | UM  | mCHH | UM  |



|           |      |      |      |     |     |     |      |     |
|-----------|------|------|------|-----|-----|-----|------|-----|
| AT1G65480 | UM   | UM   | UM   | UM  | UM  | UM  | UM   | UM  |
| AT1G65481 | UM   | UM   | UM   | UM  | UM  | UM  | UM   | UM  |
| AT1G65483 | UM   | UM   | UM   | UM  | UM  | UM  | UM   | UM  |
| AT1G65484 | UM   | UM   | UM   | UM  | UM  | UM  | UM   | UM  |
| AT1G65486 | UM   | UM   | UM   | UM  | UM  | UM  | UM   | UM  |
| AT1G65490 | UM   | UM   | UM   | UM  | UM  | UM  | UM   | UM  |
| AT1G65500 | UM   | UM   | UM   | UM  | UM  | UM  | UM   | UM  |
| AT1G65510 | UM   | UM   | UM   | UM  | UM  | UM  | UM   | UM  |
| AT1G65520 | UM   | UM   | UM   | UM  | UM  | UM  | UM   | UM  |
| AT1G65540 | gbM  | gbM  | gbM  | gbM | gbM | UM  | gbM  | gbM |
| AT1G65541 | UM   | UM   | UM   | UM  | UM  | UM  | UM   | UM  |
| AT1G65550 | mCHH | mCHH | mCHH | UM  | UM  | UM  | mCHH | UM  |
| AT1G65560 | gbM  | gbM  | gbM  | UM  | UM  | UM  | gbM  | UM  |
| AT1G65570 | UM   | UM   | UM   | UM  | UM  | UM  | UM   | UM  |
| AT1G65580 | gbM  | gbM  | gbM  | gbM | gbM | gbM | mCHH | gbM |
| AT1G65590 | UM   | UM   | UM   | UM  | UM  | UM  | UM   | UM  |
| AT1G65610 | UM   | UM   | UM   | UM  | UM  | UM  | UM   | UM  |
| AT1G65620 | UM   | UM   | UM   | UM  | UM  | UM  | UM   | UM  |
| AT1G65630 | UM   | mCHH | UM   | UM  | UM  | UM  | UM   | UM  |
| AT1G65640 | UM   | UM   | UM   | UM  | UM  | UM  | UM   | UM  |
| AT1G65650 | gbM  | gbM  | gbM  | gbM | gbM | gbM | gbM  | gbM |
| AT1G65660 | UM   | UM   | UM   | UM  | UM  | UM  | UM   | UM  |
| AT1G65670 | UM   | UM   | UM   | UM  | UM  | UM  | mCHG | UM  |
| AT1G65680 | UM   | UM   | UM   | UM  | UM  | UM  | UM   | UM  |
| AT1G65681 | mCHH | mCHH | UM   | UM  | UM  | UM  | UM   | UM  |
| AT1G65690 | UM   | UM   | UM   | UM  | UM  | UM  | UM   | UM  |
| AT1G65700 | UM   | UM   | UM   | UM  | UM  | UM  | UM   | UM  |
| AT1G65710 | UM   | UM   | UM   | UM  | UM  | UM  | UM   | UM  |
| AT1G65720 | UM   | UM   | UM   | UM  | UM  | UM  | UM   | UM  |
| AT1G65730 | UM   | UM   | UM   | UM  | UM  | UM  | UM   | UM  |
| AT1G65740 | UM   | UM   | UM   | UM  | UM  | UM  | UM   | UM  |
| AT1G65760 | UM   | UM   | UM   | UM  | UM  | UM  | UM   | UM  |
| AT1G65770 | UM   | UM   | UM   | UM  | UM  | UM  | UM   | UM  |
| AT1G65780 | UM   | UM   | UM   | UM  | UM  | UM  | UM   | UM  |
| AT1G65790 | UM   | UM   | UM   | UM  | UM  | UM  | UM   | UM  |
| AT1G65800 | UM   | UM   | UM   | UM  | UM  | UM  | UM   | UM  |
| AT1G65810 | gbM  | mCHH | gbM  | gbM | gbM | gbM | mCHH | gbM |
| AT1G65820 | UM   | UM   | UM   | UM  | UM  | UM  | UM   | UM  |
| AT1G65840 | gbM  | gbM  | gbM  | gbM | UM  | gbM | gbM  | gbM |
| AT1G65845 | UM   | UM   | UM   | UM  | UM  | UM  | UM   | UM  |
| AT1G65850 | UM   | UM   | UM   | UM  | UM  | UM  | mCHH | UM  |
| AT1G65860 | UM   | UM   | UM   | UM  | UM  | UM  | UM   | UM  |
| AT1G65870 | UM   | UM   | UM   | UM  | UM  | UM  | UM   | UM  |
| AT1G65880 | UM   | UM   | UM   | UM  | UM  | UM  | UM   | UM  |
| AT1G65890 | UM   | UM   | UM   | UM  | UM  | UM  | UM   | UM  |
| AT1G65900 | UM   | UM   | UM   | UM  | UM  | UM  | UM   | UM  |
| AT1G65907 | UM   | UM   | UM   | UM  | UM  | UM  | UM   | UM  |
| AT1G65910 | UM   | UM   | UM   | UM  | UM  | UM  | UM   | UM  |













|           |      |      |     |     |    |    |      |    |
|-----------|------|------|-----|-----|----|----|------|----|
| AT1G68170 | UM   | UM   | UM  | UM  | UM | UM | UM   | UM |
| AT1G68180 | UM   | UM   | UM  | UM  | UM | UM | mCHH | UM |
| AT1G68185 | UM   | UM   | UM  | UM  | UM | UM | UM   | UM |
| AT1G68190 | UM   | UM   | UM  | UM  | UM | UM | UM   | UM |
| AT1G68200 | UM   | UM   | UM  | UM  | UM | UM | UM   | UM |
| AT1G68210 | UM   | UM   | UM  | UM  | UM | UM | mCHH | UM |
| AT1G68220 | UM   | UM   | UM  | UM  | UM | UM | UM   | UM |
| AT1G68230 | UM   | UM   | UM  | UM  | UM | UM | UM   | UM |
| AT1G68238 | UM   | UM   | UM  | UM  | UM | UM | UM   | UM |
| AT1G68240 | UM   | UM   | UM  | UM  | UM | UM | UM   | UM |
| AT1G68250 | UM   | UM   | UM  | UM  | UM | UM | UM   | UM |
| AT1G68260 | UM   | UM   | UM  | UM  | UM | UM | UM   | UM |
| AT1G68270 | UM   | UM   | UM  | UM  | UM | UM | UM   | UM |
| AT1G68280 | UM   | UM   | UM  | UM  | UM | UM | UM   | UM |
| AT1G68290 | UM   | UM   | UM  | UM  | UM | UM | UM   | UM |
| AT1G68300 | UM   | UM   | UM  | UM  | UM | UM | UM   | UM |
| AT1G68310 | UM   | gbM  | gbM | UM  | UM | UM | gbM  | UM |
| AT1G68320 | UM   | UM   | UM  | UM  | UM | UM | UM   | UM |
| AT1G68330 | UM   | UM   | UM  | UM  | UM | UM | UM   | UM |
| AT1G68340 | UM   | UM   | UM  | UM  | UM | UM | UM   | UM |
| AT1G68350 | UM   | UM   | UM  | UM  | UM | UM | UM   | UM |
| AT1G68360 | UM   | UM   | UM  | UM  | UM | UM | UM   | UM |
| AT1G68370 | UM   | UM   | UM  | UM  | UM | UM | UM   | UM |
| AT1G68380 | UM   | UM   | UM  | UM  | UM | UM | UM   | UM |
| AT1G68390 | UM   | UM   | UM  | UM  | UM | UM | UM   | UM |
| AT1G68400 | UM   | UM   | UM  | UM  | UM | UM | UM   | UM |
| AT1G68410 | gbM  | gbM  | UM  | gbM | UM | UM | gbM  | UM |
| AT1G68420 | UM   | UM   | UM  | UM  | UM | UM | UM   | UM |
| AT1G68430 | UM   | UM   | UM  | UM  | UM | UM | UM   | UM |
| AT1G68440 | UM   | UM   | UM  | UM  | UM | UM | UM   | UM |
| AT1G68450 | UM   | UM   | UM  | UM  | UM | UM | UM   | UM |
| AT1G68460 | UM   | UM   | UM  | UM  | UM | UM | UM   | UM |
| AT1G68470 | mCHH | mCHH | UM  | UM  | UM | UM | mCHH | UM |
| AT1G68480 | UM   | UM   | UM  | UM  | UM | UM | UM   | UM |
| AT1G68490 | UM   | UM   | UM  | UM  | UM | UM | UM   | UM |
| AT1G68500 | UM   | UM   | UM  | UM  | UM | UM | UM   | UM |
| AT1G68510 | UM   | UM   | UM  | UM  | UM | UM | UM   | UM |
| AT1G68520 | UM   | UM   | UM  | UM  | UM | UM | UM   | UM |
| AT1G68526 | UM   | UM   | UM  | UM  | UM | UM | UM   | UM |
| AT1G68530 | UM   | UM   | UM  | UM  | UM | UM | UM   | UM |
| AT1G68540 | UM   | UM   | UM  | UM  | UM | UM | UM   | UM |
| AT1G68550 | UM   | UM   | UM  | UM  | UM | UM | UM   | UM |
| AT1G68552 | UM   | UM   | UM  | UM  | UM | UM | UM   | UM |
| AT1G68560 | UM   | UM   | UM  | UM  | UM | UM | UM   | UM |
| AT1G68570 | UM   | UM   | UM  | UM  | UM | UM | UM   | UM |
| AT1G68580 | UM   | UM   | UM  | UM  | UM | UM | UM   | UM |
| AT1G68585 | UM   | UM   | UM  | UM  | UM | UM | UM   | UM |
| AT1G68590 | UM   | UM   | UM  | UM  | UM | UM | UM   | UM |



|           |     |      |     |      |     |     |      |     |
|-----------|-----|------|-----|------|-----|-----|------|-----|
| AT1G69030 | UM  | UM   | UM  | UM   | UM  | UM  | UM   | UM  |
| AT1G69040 | UM  | mCHH | UM  | UM   | UM  | UM  | UM   | UM  |
| AT1G69050 | UM  | UM   | UM  | UM   | UM  | UM  | UM   | UM  |
| AT1G69060 | UM  | UM   | UM  | UM   | UM  | UM  | mCHH | UM  |
| AT1G69070 | UM  | mCHH | UM  | UM   | UM  | UM  | mCHG | UM  |
| AT1G69080 | UM  | UM   | UM  | UM   | UM  | UM  | UM   | UM  |
| AT1G69090 | UM  | UM   | UM  | UM   | UM  | UM  | UM   | UM  |
| AT1G69100 | UM  | UM   | UM  | UM   | UM  | UM  | UM   | UM  |
| AT1G69120 | UM  | UM   | UM  | UM   | UM  | UM  | UM   | UM  |
| AT1G69150 | UM  | UM   | UM  | UM   | UM  | UM  | UM   | UM  |
| AT1G69160 | UM  | UM   | UM  | UM   | UM  | UM  | UM   | UM  |
| AT1G69170 | UM  | gbM  | UM  | gbM  | UM  | UM  | gbM  | gbM |
| AT1G69180 | UM  | UM   | UM  | UM   | UM  | UM  | UM   | UM  |
| AT1G69190 | UM  | mCHG | UM  | UM   | UM  | UM  | UM   | UM  |
| AT1G69200 | UM  | UM   | UM  | UM   | UM  | UM  | mCHH | UM  |
| AT1G69210 | UM  | UM   | UM  | UM   | UM  | UM  | UM   | UM  |
| AT1G69220 | UM  | UM   | UM  | UM   | UM  | UM  | UM   | UM  |
| AT1G69230 | UM  | UM   | UM  | UM   | UM  | UM  | UM   | UM  |
| AT1G69240 | UM  | UM   | UM  | UM   | UM  | UM  | UM   | UM  |
| AT1G69250 | UM  | mCHG | UM  | mCHG | gbM | UM  | UM   | gbM |
| AT1G69260 | UM  | UM   | UM  | UM   | UM  | UM  | UM   | UM  |
| AT1G69270 | UM  | UM   | UM  | UM   | UM  | UM  | UM   | UM  |
| AT1G69280 | UM  | UM   | UM  | UM   | UM  | UM  | UM   | UM  |
| AT1G69290 | UM  | UM   | UM  | UM   | UM  | UM  | UM   | UM  |
| AT1G69295 | UM  | UM   | UM  | UM   | UM  | UM  | UM   | UM  |
| AT1G69310 | UM  | UM   | UM  | UM   | UM  | UM  | UM   | UM  |
| AT1G69320 | UM  | UM   | UM  | UM   | UM  | UM  | UM   | UM  |
| AT1G69325 | UM  | UM   | UM  | UM   | UM  | UM  | UM   | UM  |
| AT1G69330 | UM  | UM   | UM  | UM   | UM  | UM  | mCHH | UM  |
| AT1G69340 | gbM | gbM  | gbM | gbM  | gbM | gbM | gbM  | gbM |
| AT1G69350 | UM  | UM   | UM  | UM   | UM  | UM  | UM   | UM  |
| AT1G69360 | gbM | gbM  | gbM | gbM  | gbM | gbM | gbM  | gbM |
| AT1G69370 | UM  | UM   | UM  | UM   | UM  | UM  | UM   | UM  |
| AT1G69380 | UM  | UM   | UM  | UM   | UM  | UM  | UM   | UM  |
| AT1G69390 | gbM | gbM  | gbM | gbM  | gbM | gbM | gbM  | gbM |
| AT1G69400 | UM  | UM   | UM  | UM   | UM  | UM  | UM   | UM  |
| AT1G69410 | UM  | UM   | UM  | UM   | UM  | UM  | UM   | UM  |
| AT1G69420 | UM  | UM   | gbM | UM   | gbM | UM  | UM   | UM  |
| AT1G69430 | UM  | UM   | UM  | UM   | UM  | UM  | UM   | UM  |
| AT1G69440 | UM  | mCHH | UM  | UM   | UM  | UM  | mCHH | UM  |
| AT1G69450 | UM  | UM   | UM  | UM   | UM  | UM  | mCHH | UM  |
| AT1G69460 | UM  | UM   | UM  | UM   | UM  | UM  | UM   | UM  |
| AT1G69470 | UM  | UM   | UM  | UM   | UM  | UM  | UM   | UM  |
| AT1G69480 | UM  | UM   | UM  | UM   | UM  | UM  | UM   | UM  |
| AT1G69485 | UM  | UM   | UM  | UM   | UM  | UM  | UM   | UM  |
| AT1G69490 | UM  | UM   | UM  | UM   | UM  | UM  | UM   | UM  |
| AT1G69500 | UM  | gbM  | UM  | UM   | UM  | UM  | gbM  | UM  |
| AT1G69510 | UM  | UM   | UM  | UM   | UM  | UM  | UM   | UM  |



|           |      |      |     |     |     |     |      |     |
|-----------|------|------|-----|-----|-----|-----|------|-----|
| AT1G69520 | UM   | UM   | UM  | UM  | UM  | UM  | UM   | UM  |
| AT1G69523 | UM   | UM   | UM  | UM  | UM  | UM  | UM   | UM  |
| AT1G69526 | UM   | UM   | UM  | UM  | UM  | UM  | UM   | UM  |
| AT1G69530 | UM   | UM   | UM  | UM  | UM  | UM  | UM   | UM  |
| AT1G69540 | UM   | UM   | UM  | UM  | UM  | UM  | UM   | UM  |
| AT1G69550 | UM   | mCHH | UM  | UM  | UM  | UM  | mCHH | UM  |
| AT1G69560 | UM   | UM   | UM  | UM  | UM  | UM  | UM   | UM  |
| AT1G69570 | UM   | UM   | UM  | UM  | UM  | UM  | UM   | UM  |
| AT1G69580 | UM   | UM   | UM  | UM  | UM  | UM  | UM   | UM  |
| AT1G69588 | UM   | UM   | UM  | UM  | UM  | UM  | mCHH | UM  |
| AT1G69600 | UM   | UM   | UM  | UM  | UM  | UM  | UM   | UM  |
| AT1G69610 | mCHH | UM   | UM  | UM  | UM  | UM  | mCHG | UM  |
| AT1G69620 | UM   | UM   | UM  | UM  | UM  | UM  | UM   | UM  |
| AT1G69630 | UM   | UM   | UM  | UM  | UM  | UM  | UM   | UM  |
| AT1G69640 | UM   | gbM  | gbM | UM  | UM  | UM  | gbM  | gbM |
| AT1G69650 | UM   | UM   | UM  | UM  | UM  | UM  | UM   | UM  |
| AT1G69660 | UM   | UM   | UM  | UM  | UM  | UM  | UM   | UM  |
| AT1G69670 | gbM  | gbM  | UM  | gbM | gbM | UM  | gbM  | UM  |
| AT1G69680 | UM   | UM   | UM  | UM  | UM  | UM  | UM   | UM  |
| AT1G69690 | UM   | UM   | UM  | UM  | UM  | UM  | UM   | UM  |
| AT1G69700 | UM   | UM   | UM  | UM  | UM  | UM  | UM   | UM  |
| AT1G69710 | UM   | UM   | UM  | UM  | UM  | UM  | mCHH | UM  |
| AT1G69720 | UM   | UM   | UM  | UM  | UM  | UM  | UM   | UM  |
| AT1G69730 | UM   | UM   | UM  | UM  | UM  | UM  | UM   | UM  |
| AT1G69740 | gbM  | gbM  | gbM | UM  | gbM | UM  | gbM  | UM  |
| AT1G69750 | UM   | UM   | UM  | UM  | UM  | UM  | UM   | UM  |
| AT1G69760 | UM   | UM   | UM  | UM  | UM  | UM  | UM   | UM  |
| AT1G69770 | UM   | UM   | UM  | UM  | UM  | UM  | UM   | UM  |
| AT1G69780 | UM   | UM   | UM  | UM  | UM  | UM  | mCHH | UM  |
| AT1G69790 | UM   | UM   | UM  | UM  | UM  | UM  | UM   | UM  |
| AT1G69800 | UM   | UM   | UM  | UM  | UM  | UM  | UM   | UM  |
| AT1G69810 | UM   | UM   | UM  | UM  | UM  | UM  | UM   | UM  |
| AT1G69818 | UM   | UM   | UM  | UM  | UM  | UM  | UM   | UM  |
| AT1G69820 | UM   | UM   | UM  | UM  | UM  | UM  | UM   | UM  |
| AT1G69825 | UM   | UM   | UM  | UM  | UM  | UM  | UM   | UM  |
| AT1G69828 | UM   | UM   | UM  | UM  | UM  | UM  | UM   | UM  |
| AT1G69830 | gbM  | UM   | gbM | gbM | UM  | gbM | gbM  | UM  |
| AT1G69840 | UM   | UM   | UM  | UM  | UM  | UM  | UM   | UM  |
| AT1G69850 | UM   | UM   | UM  | UM  | UM  | UM  | UM   | UM  |
| AT1G69860 | UM   | UM   | UM  | UM  | UM  | UM  | UM   | UM  |
| AT1G69870 | UM   | UM   | UM  | UM  | UM  | UM  | UM   | UM  |
| AT1G69880 | UM   | UM   | UM  | UM  | UM  | UM  | UM   | UM  |
| AT1G69890 | UM   | UM   | UM  | UM  | UM  | UM  | UM   | UM  |
| AT1G69900 | UM   | UM   | UM  | UM  | UM  | UM  | UM   | UM  |
| AT1G69910 | UM   | UM   | UM  | UM  | UM  | UM  | UM   | UM  |
| AT1G69920 | UM   | UM   | UM  | UM  | UM  | UM  | UM   | UM  |
| AT1G69930 | UM   | UM   | UM  | UM  | UM  | UM  | UM   | UM  |
| AT1G69935 | UM   | UM   | UM  | UM  | UM  | UM  | UM   | UM  |

|           |      |      |      |      |      |      |      |      |
|-----------|------|------|------|------|------|------|------|------|
| AT1G69940 | mCHH | mCHG |
| AT1G69960 | UM   |
| AT1G69970 | UM   |
| AT1G69980 | UM   | UM   | UM   | UM   | UM   | UM   | mCHH | UM   |
| AT1G69990 | UM   |
| AT1G70000 | UM   |
| AT1G70020 | UM   |
| AT1G70030 | UM   |
| AT1G70040 | UM   |
| AT1G70060 | mCHH | mCHH | gbM  | gbM  | gbM  | gbM  | mCHH | gbM  |
| AT1G70070 | gbM  | mCHH | gbM  | gbM  | gbM  | gbM  | mCHH | UM   |
| AT1G70080 | UM   |
| AT1G70090 | UM   |
| AT1G70100 | UM   |
| AT1G70110 | UM   |
| AT1G70120 | UM   |
| AT1G70130 | gbM  | gbM  | gbM  | UM   | UM   | UM   | gbM  | UM   |
| AT1G70140 | UM   |
| AT1G70150 | UM   |
| AT1G70160 | gbM  | gbM  | gbM  | UM   | UM   | UM   | gbM  | UM   |
| AT1G70170 | UM   |
| AT1G70180 | UM   | gbM  | gbM  | gbM  | gbM  | UM   | gbM  | gbM  |
| AT1G70190 | UM   |
| AT1G70200 | UM   | mCHH | UM   | UM   | UM   | UM   | mCHH | UM   |
| AT1G70209 | UM   |
| AT1G70210 | UM   |
| AT1G70220 | UM   |
| AT1G70230 | UM   |
| AT1G70250 | UM   |
| AT1G70260 | UM   |
| AT1G70270 | UM   |
| AT1G70280 | gbM  |
| AT1G70290 | UM   |
| AT1G70300 | gbM  | gbM  | gbM  | gbM  | gbM  | gbM  | mCHH | UM   |
| AT1G70310 | UM   |
| AT1G70320 | gbM  | mCHH | gbM  | gbM  | gbM  | gbM  | mCHH | gbM  |
| AT1G70330 | UM   |
| AT1G70340 | UM   |
| AT1G70350 | UM   |
| AT1G70360 | UM   |
| AT1G70370 | UM   |
| AT1G70380 | UM   | UM   | UM   | UM   | UM   | UM   | mCHH | UM   |
| AT1G70390 | UM   |
| AT1G70400 | UM   |
| AT1G70410 | UM   |
| AT1G70420 | UM   |
| AT1G70430 | UM   |
| AT1G70440 | UM   |





|           |     |      |     |     |     |     |      |     |
|-----------|-----|------|-----|-----|-----|-----|------|-----|
| AT1G71340 | UM  | UM   | UM  | UM  | UM  | UM  | UM   | UM  |
| AT1G71350 | UM  | UM   | UM  | UM  | UM  | UM  | UM   | UM  |
| AT1G71360 | gbM | mCHG | gbM | UM  | UM  | UM  | mCHH | UM  |
| AT1G71370 | UM  | UM   | UM  | UM  | UM  | UM  | UM   | UM  |
| AT1G71380 | UM  | UM   | UM  | UM  | UM  | UM  | UM   | UM  |
| AT1G71390 | UM  | UM   | UM  | UM  | UM  | UM  | UM   | UM  |
| AT1G71400 | UM  | UM   | UM  | UM  | UM  | UM  | UM   | UM  |
| AT1G71410 | gbM | gbM  | gbM | gbM | gbM | gbM | gbM  | gbM |
| AT1G71420 | UM  | UM   | UM  | UM  | UM  | UM  | UM   | UM  |
| AT1G71430 | UM  | UM   | UM  | UM  | UM  | UM  | UM   | UM  |
| AT1G71440 | UM  | UM   | UM  | UM  | UM  | UM  | UM   | UM  |
| AT1G71450 | UM  | UM   | UM  | UM  | UM  | UM  | UM   | UM  |
| AT1G71460 | UM  | UM   | UM  | UM  | UM  | UM  | UM   | UM  |
| AT1G71470 | UM  | UM   | UM  | UM  | UM  | UM  | UM   | UM  |
| AT1G71480 | UM  | UM   | UM  | UM  | UM  | UM  | UM   | UM  |
| AT1G71490 | UM  | UM   | UM  | UM  | UM  | UM  | UM   | UM  |
| AT1G71500 | UM  | UM   | UM  | UM  | UM  | UM  | UM   | UM  |
| AT1G71520 | UM  | UM   | UM  | UM  | UM  | UM  | UM   | UM  |
| AT1G71530 | gbM | gbM  | UM  | gbM | UM  | UM  | gbM  | UM  |
| AT1G71680 | UM  | UM   | UM  | UM  | UM  | UM  | UM   | UM  |
| AT1G71690 | UM  | UM   | UM  | UM  | UM  | UM  | UM   | UM  |
| AT1G71691 | UM  | UM   | UM  | UM  | UM  | UM  | UM   | UM  |
| AT1G71692 | UM  | UM   | UM  | UM  | UM  | UM  | mCHH | UM  |
| AT1G71695 | UM  | UM   | UM  | UM  | UM  | UM  | UM   | UM  |
| AT1G71696 | gbM | mCHH | gbM | gbM | UM  | UM  | gbM  | UM  |
| AT1G71697 | UM  | UM   | UM  | UM  | UM  | UM  | UM   | UM  |
| AT1G71710 | gbM | gbM  | gbM | gbM | gbM | gbM | mCHH | UM  |
| AT1G71720 | UM  | UM   | UM  | UM  | UM  | UM  | UM   | UM  |
| AT1G71730 | UM  | UM   | UM  | UM  | UM  | UM  | UM   | UM  |
| AT1G71740 | UM  | UM   | UM  | UM  | UM  | UM  | UM   | UM  |
| AT1G71750 | UM  | UM   | UM  | UM  | UM  | UM  | UM   | UM  |
| AT1G71760 | gbM | gbM  | gbM | gbM | UM  | UM  | gbM  | UM  |
| AT1G71770 | UM  | UM   | UM  | UM  | UM  | UM  | UM   | UM  |
| AT1G71780 | UM  | UM   | UM  | UM  | UM  | UM  | UM   | UM  |
| AT1G71790 | UM  | UM   | UM  | UM  | UM  | UM  | UM   | UM  |
| AT1G71800 | UM  | UM   | UM  | UM  | UM  | UM  | UM   | UM  |
| AT1G71810 | UM  | UM   | UM  | UM  | UM  | UM  | UM   | UM  |
| AT1G71820 | gbM | mCHH | gbM | gbM | gbM | gbM | gbM  | gbM |
| AT1G71830 | gbM | gbM  | gbM | gbM | gbM | gbM | mCHH | gbM |
| AT1G71840 | UM  | UM   | UM  | UM  | UM  | UM  | UM   | UM  |
| AT1G71850 | UM  | UM   | UM  | UM  | UM  | UM  | UM   | UM  |
| AT1G71860 | UM  | UM   | UM  | UM  | UM  | UM  | UM   | UM  |
| AT1G71865 | UM  | UM   | UM  | UM  | UM  | UM  | UM   | UM  |
| AT1G71866 | UM  | UM   | UM  | UM  | UM  | UM  | UM   | UM  |
| AT1G71870 | UM  | UM   | UM  | UM  | UM  | UM  | UM   | UM  |
| AT1G71880 | UM  | UM   | UM  | UM  | UM  | UM  | UM   | UM  |
| AT1G71890 | UM  | UM   | UM  | UM  | UM  | UM  | UM   | UM  |
| AT1G71900 | gbM | gbM  | gbM | UM  | UM  | UM  | mCHH | UM  |

|           |      |      |      |      |      |      |      |      |
|-----------|------|------|------|------|------|------|------|------|
| AT1G71910 | UM   |
| AT1G71920 | mCHH | mCHH | mCHH | mCHH | mCHG | mCHH | mCHH | mCHH |
| AT1G71930 | mCHH | mCHH | mCHH | mCHG | mCHG | mCHG | mCHH | UM   |
| AT1G71940 | UM   |
| AT1G71950 | UM   |
| AT1G71960 | UM   |
| AT1G71970 | UM   | UM   | UM   | UM   | UM   | UM   | mCHH | UM   |
| AT1G71980 | gbM  | gbM  | gbM  | UM   | UM   | UM   | gbM  | UM   |
| AT1G71990 | gbM  |
| AT1G72000 | UM   |
| AT1G72010 | UM   |
| AT1G72020 | UM   |
| AT1G72030 | UM   |
| AT1G72040 | UM   |
| AT1G72050 | UM   |
| AT1G72060 | UM   |
| AT1G72070 | UM   |
| AT1G72080 | gbM  | gbM  | gbM  | gbM  | UM   | gbM  | mCHG | UM   |
| AT1G72090 | UM   |
| AT1G72100 | UM   |
| AT1G72110 | UM   | UM   | UM   | UM   | UM   | UM   | mCHH | UM   |
| AT1G72120 | UM   |
| AT1G72125 | UM   |
| AT1G72130 | UM   |
| AT1G72140 | UM   |
| AT1G72141 | UM   |
| AT1G72150 | UM   |
| AT1G72160 | UM   |
| AT1G72170 | UM   |
| AT1G72175 | UM   |
| AT1G72180 | UM   | UM   | UM   | UM   | UM   | UM   | gbM  | UM   |
| AT1G72190 | UM   | gbM  | gbM  | UM   | gbM  | UM   | gbM  | UM   |
| AT1G72200 | UM   |
| AT1G72210 | UM   |
| AT1G72220 | UM   |
| AT1G72230 | UM   |
| AT1G72240 | UM   |
| AT1G72250 | UM   | mCHH | UM   | UM   | UM   | UM   | mCHH | UM   |
| AT1G72260 | UM   |
| AT1G72270 | UM   | mCHH | UM   | UM   | UM   | UM   | mCHH | UM   |
| AT1G72280 | UM   |
| AT1G72290 | UM   |
| AT1G72300 | UM   |
| AT1G72310 | UM   |
| AT1G72320 | gbM  | mCHH | gbM  | UM   | UM   | UM   | mCHH | UM   |
| AT1G72330 | gbM  | gbM  | gbM  | UM   | UM   | UM   | mCHH | UM   |
| AT1G72340 | UM   |
| AT1G72350 | UM   |

|           |      |      |     |     |     |     |      |     |
|-----------|------|------|-----|-----|-----|-----|------|-----|
| AT1G72360 | UM   | UM   | UM  | UM  | UM  | UM  | UM   | UM  |
| AT1G72370 | UM   | UM   | UM  | UM  | UM  | UM  | UM   | UM  |
| AT1G72390 | gbM  | gbM  | gbM | gbM | gbM | gbM | mCHH | gbM |
| AT1G72410 | gbM  | mCHH | gbM | gbM | gbM | gbM | mCHH | gbM |
| AT1G72416 | UM   | UM   | UM  | UM  | UM  | UM  | mCHH | UM  |
| AT1G72420 | UM   | UM   | UM  | UM  | UM  | UM  | UM   | UM  |
| AT1G72430 | UM   | UM   | UM  | UM  | UM  | UM  | UM   | UM  |
| AT1G72440 | mCHH | mCHH | UM  | UM  | UM  | UM  | mCHG | UM  |
| AT1G72450 | UM   | UM   | UM  | UM  | UM  | UM  | UM   | UM  |
| AT1G72460 | UM   | UM   | UM  | UM  | UM  | UM  | UM   | UM  |
| AT1G72470 | UM   | UM   | UM  | UM  | UM  | UM  | UM   | UM  |
| AT1G72480 | gbM  | gbM  | UM  | UM  | gbM | UM  | gbM  | UM  |
| AT1G72490 | UM   | UM   | UM  | UM  | UM  | UM  | UM   | UM  |
| AT1G72500 | UM   | UM   | UM  | UM  | UM  | UM  | UM   | UM  |
| AT1G72510 | UM   | UM   | UM  | UM  | UM  | UM  | UM   | UM  |
| AT1G72520 | UM   | UM   | UM  | UM  | UM  | UM  | UM   | UM  |
| AT1G72530 | UM   | UM   | UM  | UM  | UM  | UM  | UM   | UM  |
| AT1G72540 | UM   | gbM  | gbM | gbM | gbM | UM  | gbM  | UM  |
| AT1G72550 | UM   | UM   | UM  | UM  | UM  | UM  | mCHH | UM  |
| AT1G72560 | gbM  | gbM  | gbM | gbM | gbM | gbM | mCHH | gbM |
| AT1G72570 | UM   | UM   | UM  | UM  | UM  | UM  | UM   | UM  |
| AT1G72580 | UM   | UM   | UM  | UM  | UM  | UM  | UM   | UM  |
| AT1G72590 | UM   | UM   | UM  | UM  | UM  | UM  | UM   | UM  |
| AT1G72600 | UM   | UM   | UM  | UM  | UM  | UM  | UM   | UM  |
| AT1G72610 | UM   | UM   | UM  | UM  | UM  | UM  | UM   | UM  |
| AT1G72620 | UM   | UM   | UM  | UM  | UM  | UM  | UM   | UM  |
| AT1G72630 | UM   | UM   | UM  | UM  | UM  | UM  | UM   | UM  |
| AT1G72640 | UM   | UM   | UM  | UM  | UM  | UM  | UM   | UM  |
| AT1G72645 | UM   | UM   | UM  | UM  | UM  | UM  | UM   | UM  |
| AT1G72650 | gbM  | gbM  | gbM | gbM | gbM | gbM | gbM  | gbM |
| AT1G72660 | UM   | UM   | UM  | UM  | UM  | UM  | UM   | UM  |
| AT1G72670 | UM   | UM   | UM  | UM  | UM  | UM  | UM   | UM  |
| AT1G72680 | UM   | UM   | UM  | UM  | UM  | UM  | UM   | UM  |
| AT1G72690 | UM   | UM   | UM  | UM  | UM  | UM  | UM   | UM  |
| AT1G72700 | gbM  | gbM  | gbM | gbM | gbM | gbM | mCHH | gbM |
| AT1G72710 | UM   | UM   | UM  | UM  | UM  | UM  | UM   | UM  |
| AT1G72720 | UM   | UM   | UM  | UM  | UM  | UM  | UM   | UM  |
| AT1G72730 | UM   | UM   | UM  | UM  | gbM | UM  | UM   | UM  |
| AT1G72740 | UM   | UM   | UM  | UM  | UM  | UM  | UM   | UM  |
| AT1G72750 | UM   | UM   | UM  | UM  | UM  | UM  | UM   | UM  |
| AT1G72760 | UM   | UM   | UM  | UM  | UM  | UM  | UM   | UM  |
| AT1G72770 | gbM  | gbM  | gbM | gbM | gbM | gbM | gbM  | gbM |
| AT1G72790 | UM   | UM   | UM  | UM  | UM  | UM  | UM   | UM  |
| AT1G72800 | UM   | UM   | UM  | UM  | UM  | UM  | mCHH | UM  |
| AT1G72810 | UM   | UM   | UM  | UM  | UM  | UM  | UM   | UM  |
| AT1G72820 | UM   | UM   | UM  | UM  | UM  | UM  | UM   | UM  |
| AT1G72830 | UM   | UM   | UM  | UM  | UM  | UM  | UM   | UM  |
| AT1G72840 | UM   | UM   | UM  | UM  | UM  | UM  | UM   | UM  |

|           |     |      |     |     |     |     |      |     |
|-----------|-----|------|-----|-----|-----|-----|------|-----|
| AT1G72850 | UM  | UM   | UM  | UM  | UM  | UM  | UM   | UM  |
| AT1G72860 | UM  | mCHH | UM  | UM  | UM  | UM  | UM   | UM  |
| AT1G72870 | UM  | UM   | UM  | UM  | UM  | UM  | UM   | UM  |
| AT1G72880 | UM  | UM   | UM  | UM  | UM  | UM  | UM   | UM  |
| AT1G72890 | UM  | UM   | UM  | UM  | UM  | UM  | UM   | UM  |
| AT1G72900 | UM  | UM   | UM  | UM  | UM  | UM  | UM   | UM  |
| AT1G72910 | UM  | UM   | UM  | UM  | UM  | UM  | UM   | UM  |
| AT1G72920 | UM  | UM   | UM  | UM  | UM  | UM  | UM   | UM  |
| AT1G72930 | UM  | UM   | UM  | UM  | UM  | UM  | UM   | UM  |
| AT1G72940 | UM  | UM   | UM  | UM  | UM  | UM  | UM   | UM  |
| AT1G72950 | UM  | UM   | UM  | UM  | UM  | UM  | UM   | UM  |
| AT1G72960 | UM  | UM   | UM  | UM  | UM  | UM  | UM   | UM  |
| AT1G72970 | UM  | UM   | UM  | UM  | UM  | UM  | UM   | UM  |
| AT1G72980 | UM  | UM   | UM  | UM  | UM  | UM  | UM   | UM  |
| AT1G72990 | UM  | UM   | UM  | UM  | UM  | UM  | UM   | UM  |
| AT1G73000 | UM  | UM   | UM  | UM  | UM  | UM  | UM   | UM  |
| AT1G73010 | UM  | UM   | UM  | UM  | UM  | UM  | mCHH | UM  |
| AT1G73020 | gbM | gbM  | gbM | gbM | gbM | gbM | gbM  | gbM |
| AT1G73030 | UM  | UM   | UM  | UM  | UM  | UM  | UM   | UM  |
| AT1G73040 | UM  | UM   | UM  | UM  | UM  | UM  | UM   | UM  |
| AT1G73050 | UM  | UM   | UM  | UM  | UM  | UM  | UM   | UM  |
| AT1G73060 | UM  | UM   | UM  | UM  | UM  | UM  | UM   | UM  |
| AT1G73066 | UM  | gbM  | UM  | UM  | UM  | UM  | UM   | UM  |
| AT1G73080 | gbM | gbM  | gbM | gbM | gbM | gbM | gbM  | gbM |
| AT1G73090 | UM  | UM   | UM  | UM  | UM  | UM  | UM   | UM  |
| AT1G73100 | UM  | gbM  | UM  | UM  | UM  | UM  | UM   | UM  |
| AT1G73110 | UM  | UM   | UM  | UM  | UM  | UM  | UM   | UM  |
| AT1G73120 | UM  | UM   | UM  | UM  | UM  | UM  | UM   | UM  |
| AT1G73130 | UM  | UM   | UM  | UM  | UM  | UM  | mCHH | UM  |
| AT1G73140 | UM  | UM   | UM  | UM  | UM  | UM  | UM   | UM  |
| AT1G73150 | UM  | UM   | UM  | UM  | UM  | UM  | UM   | UM  |
| AT1G73160 | UM  | UM   | UM  | UM  | UM  | UM  | UM   | UM  |
| AT1G73165 | UM  | UM   | UM  | UM  | UM  | UM  | UM   | UM  |
| AT1G73170 | UM  | UM   | UM  | UM  | UM  | UM  | UM   | UM  |
| AT1G73177 | UM  | UM   | UM  | UM  | UM  | UM  | UM   | UM  |
| AT1G73180 | gbM | gbM  | gbM | gbM | gbM | gbM | gbM  | UM  |
| AT1G73190 | UM  | UM   | UM  | UM  | UM  | UM  | UM   | UM  |
| AT1G73200 | UM  | UM   | UM  | UM  | UM  | UM  | UM   | UM  |
| AT1G73210 | UM  | UM   | UM  | UM  | UM  | UM  | UM   | UM  |
| AT1G73220 | UM  | UM   | UM  | UM  | UM  | UM  | UM   | UM  |
| AT1G73230 | UM  | UM   | UM  | UM  | UM  | UM  | UM   | UM  |
| AT1G73240 | UM  | gbM  | UM  | UM  | UM  | UM  | gbM  | UM  |
| AT1G73250 | UM  | UM   | UM  | UM  | UM  | UM  | UM   | UM  |
| AT1G73260 | UM  | UM   | UM  | UM  | UM  | UM  | UM   | UM  |
| AT1G73270 | UM  | UM   | UM  | UM  | UM  | UM  | UM   | UM  |
| AT1G73280 | UM  | UM   | UM  | UM  | UM  | UM  | UM   | UM  |
| AT1G73290 | UM  | UM   | UM  | UM  | UM  | UM  | UM   | UM  |
| AT1G73300 | UM  | UM   | UM  | UM  | UM  | UM  | UM   | UM  |





|           |      |      |      |     |     |     |      |     |
|-----------|------|------|------|-----|-----|-----|------|-----|
| AT1G73760 | UM   | UM   | UM   | UM  | UM  | UM  | UM   | UM  |
| AT1G73770 | UM   | UM   | UM   | UM  | UM  | UM  | UM   | UM  |
| AT1G73780 | UM   | UM   | UM   | UM  | UM  | UM  | UM   | UM  |
| AT1G73790 | UM   | UM   | UM   | UM  | UM  | UM  | UM   | UM  |
| AT1G73805 | UM   | mCHH | UM   | UM  | UM  | UM  | UM   | UM  |
| AT1G73810 | UM   | UM   | UM   | UM  | UM  | UM  | UM   | UM  |
| AT1G73820 | UM   | UM   | UM   | UM  | UM  | UM  | UM   | UM  |
| AT1G73830 | UM   | UM   | UM   | UM  | UM  | UM  | UM   | UM  |
| AT1G73840 | UM   | UM   | UM   | UM  | UM  | UM  | UM   | UM  |
| AT1G73850 | UM   | UM   | UM   | UM  | UM  | UM  | mCHH | UM  |
| AT1G73860 | UM   | mCHH | mCHH | UM  | UM  | UM  | mCHH | UM  |
| AT1G73870 | UM   | UM   | UM   | UM  | UM  | UM  | UM   | UM  |
| AT1G73875 | UM   | UM   | UM   | UM  | UM  | UM  | UM   | UM  |
| AT1G73880 | UM   | UM   | UM   | UM  | UM  | UM  | UM   | UM  |
| AT1G73885 | UM   | UM   | UM   | UM  | UM  | UM  | UM   | UM  |
| AT1G73890 | UM   | UM   | UM   | UM  | UM  | UM  | UM   | UM  |
| AT1G73910 | UM   | UM   | UM   | UM  | UM  | UM  | UM   | UM  |
| AT1G73920 | UM   | UM   | UM   | UM  | UM  | UM  | UM   | UM  |
| AT1G73930 | UM   | UM   | UM   | UM  | UM  | UM  | UM   | UM  |
| AT1G73940 | UM   | UM   | UM   | UM  | UM  | UM  | UM   | UM  |
| AT1G73950 | gbM  | gbM  | UM   | UM  | UM  | UM  | gbM  | UM  |
| AT1G73960 | mCHH | mCHH | gbM  | gbM | gbM | gbM | mCHH | gbM |
| AT1G73965 | UM   | UM   | UM   | UM  | UM  | UM  | UM   | UM  |
| AT1G73970 | UM   | UM   | UM   | UM  | UM  | UM  | UM   | UM  |
| AT1G73980 | UM   | UM   | UM   | UM  | UM  | UM  | UM   | UM  |
| AT1G73990 | UM   | UM   | UM   | UM  | UM  | UM  | UM   | UM  |
| AT1G74000 | UM   | UM   | UM   | UM  | UM  | UM  | UM   | UM  |
| AT1G74010 | UM   | UM   | UM   | UM  | UM  | UM  | UM   | UM  |
| AT1G74020 | UM   | UM   | UM   | UM  | UM  | UM  | UM   | UM  |
| AT1G74030 | UM   | UM   | UM   | UM  | UM  | UM  | UM   | UM  |
| AT1G74040 | UM   | UM   | UM   | UM  | UM  | UM  | UM   | UM  |
| AT1G74045 | UM   | UM   | UM   | UM  | UM  | UM  | UM   | UM  |
| AT1G74050 | UM   | UM   | UM   | UM  | UM  | UM  | UM   | UM  |
| AT1G74055 | UM   | UM   | UM   | UM  | UM  | UM  | UM   | UM  |
| AT1G74060 | UM   | UM   | UM   | UM  | UM  | UM  | UM   | UM  |
| AT1G74070 | UM   | UM   | UM   | UM  | UM  | UM  | UM   | UM  |
| AT1G74080 | UM   | UM   | UM   | UM  | UM  | UM  | UM   | UM  |
| AT1G74088 | UM   | UM   | UM   | UM  | UM  | UM  | UM   | UM  |
| AT1G74090 | UM   | UM   | UM   | UM  | UM  | UM  | UM   | UM  |
| AT1G74100 | UM   | UM   | UM   | UM  | UM  | UM  | UM   | UM  |
| AT1G74110 | UM   | UM   | UM   | UM  | UM  | UM  | UM   | UM  |
| AT1G74120 | UM   | UM   | UM   | UM  | UM  | UM  | UM   | UM  |
| AT1G74130 | UM   | UM   | UM   | UM  | UM  | UM  | UM   | UM  |
| AT1G74140 | UM   | UM   | UM   | UM  | UM  | UM  | UM   | UM  |
| AT1G74150 | UM   | UM   | UM   | UM  | UM  | UM  | UM   | UM  |
| AT1G74160 | gbM  | gbM  | gbM  | gbM | gbM | gbM | gbM  | gbM |
| AT1G74170 | gbM  | UM   | UM   | gbM | UM  | UM  | mCHH | UM  |
| AT1G74180 | gbM  | mCHH | gbM  | gbM | gbM | gbM | mCHH | gbM |

|           |      |      |      |     |     |     |      |     |
|-----------|------|------|------|-----|-----|-----|------|-----|
| AT1G74190 | UM   | UM   | UM   | UM  | UM  | UM  | mCHH | UM  |
| AT1G74200 | UM   | UM   | UM   | UM  | UM  | UM  | UM   | UM  |
| AT1G74210 | UM   | gbM  | UM   | UM  | UM  | UM  | UM   | UM  |
| AT1G74220 | UM   | UM   | UM   | UM  | UM  | UM  | UM   | UM  |
| AT1G74230 | UM   | gbM  | UM   | UM  | UM  | UM  | gbM  | UM  |
| AT1G74240 | UM   | UM   | UM   | UM  | UM  | UM  | UM   | UM  |
| AT1G74250 | mCHG | mCHG | mCHH | UM  | UM  | UM  | mCHH | UM  |
| AT1G74260 | gbM  | gbM  | gbM  | gbM | gbM | gbM | mCHH | gbM |
| AT1G74270 | UM   | UM   | UM   | UM  | UM  | UM  | UM   | UM  |
| AT1G74280 | UM   | UM   | UM   | UM  | UM  | UM  | UM   | UM  |
| AT1G74290 | UM   | UM   | UM   | UM  | UM  | UM  | UM   | UM  |
| AT1G74300 | UM   | UM   | UM   | UM  | UM  | UM  | UM   | UM  |
| AT1G74310 | UM   | UM   | UM   | UM  | UM  | UM  | UM   | UM  |
| AT1G74320 | UM   | UM   | UM   | UM  | UM  | UM  | UM   | UM  |
| AT1G74330 | UM   | UM   | UM   | UM  | UM  | UM  | UM   | UM  |
| AT1G74340 | UM   | UM   | UM   | UM  | UM  | UM  | UM   | UM  |
| AT1G74350 | gbM  | gbM  | gbM  | gbM | gbM | gbM | gbM  | gbM |
| AT1G74360 | UM   | UM   | UM   | UM  | UM  | UM  | UM   | UM  |
| AT1G74370 | UM   | UM   | UM   | UM  | UM  | UM  | UM   | UM  |
| AT1G74380 | UM   | UM   | UM   | UM  | UM  | UM  | UM   | UM  |
| AT1G74390 | UM   | UM   | UM   | UM  | UM  | UM  | UM   | UM  |
| AT1G74400 | UM   | mCHH | UM   | UM  | UM  | UM  | UM   | UM  |
| AT1G74410 | UM   | UM   | UM   | UM  | UM  | UM  | UM   | UM  |
| AT1G74420 | UM   | UM   | UM   | UM  | UM  | UM  | UM   | UM  |
| AT1G74430 | UM   | UM   | UM   | UM  | UM  | UM  | UM   | UM  |
| AT1G74440 | UM   | UM   | UM   | UM  | UM  | UM  | UM   | UM  |
| AT1G74448 | UM   | UM   | UM   | UM  | UM  | UM  | UM   | UM  |
| AT1G74450 | UM   | UM   | UM   | UM  | UM  | UM  | UM   | UM  |
| AT1G74458 | UM   | UM   | UM   | UM  | UM  | UM  | UM   | UM  |
| AT1G74460 | UM   | UM   | UM   | UM  | UM  | UM  | UM   | UM  |
| AT1G74470 | UM   | UM   | UM   | UM  | UM  | UM  | UM   | UM  |
| AT1G74480 | UM   | UM   | UM   | UM  | UM  | UM  | UM   | UM  |
| AT1G74490 | UM   | UM   | UM   | UM  | UM  | UM  | UM   | UM  |
| AT1G74500 | UM   | UM   | UM   | UM  | UM  | UM  | UM   | UM  |
| AT1G74510 | gbM  | gbM  | gbM  | gbM | gbM | gbM | gbM  | gbM |
| AT1G74520 | UM   | UM   | UM   | UM  | UM  | UM  | UM   | UM  |
| AT1G74530 | UM   | UM   | UM   | UM  | UM  | UM  | mCHH | UM  |
| AT1G74540 | gbM  | gbM  | UM   | UM  | UM  | UM  | gbM  | UM  |
| AT1G74550 | UM   | UM   | UM   | UM  | UM  | UM  | UM   | UM  |
| AT1G74560 | UM   | UM   | UM   | UM  | UM  | UM  | UM   | UM  |
| AT1G74580 | gbM  | gbM  | gbM  | UM  | UM  | UM  | gbM  | UM  |
| AT1G74590 | UM   | UM   | UM   | UM  | UM  | UM  | UM   | UM  |
| AT1G74600 | UM   | gbM  | UM   | UM  | UM  | UM  | UM   | UM  |
| AT1G74620 | UM   | UM   | UM   | UM  | UM  | UM  | UM   | UM  |
| AT1G74630 | UM   | UM   | UM   | UM  | UM  | UM  | UM   | UM  |
| AT1G74640 | UM   | UM   | UM   | UM  | UM  | UM  | UM   | UM  |
| AT1G74650 | UM   | UM   | UM   | UM  | UM  | UM  | UM   | UM  |
| AT1G74660 | UM   | UM   | UM   | UM  | UM  | UM  | UM   | UM  |

|           |     |      |     |     |     |     |      |     |
|-----------|-----|------|-----|-----|-----|-----|------|-----|
| AT1G74670 | UM  | UM   | UM  | UM  | UM  | UM  | UM   | UM  |
| AT1G74680 | UM  | UM   | UM  | UM  | UM  | UM  | UM   | UM  |
| AT1G74690 | gbM | gbM  | gbM | gbM | gbM | gbM | gbM  | gbM |
| AT1G74700 | UM  | UM   | UM  | UM  | UM  | UM  | UM   | UM  |
| AT1G74710 | UM  | UM   | UM  | UM  | UM  | UM  | UM   | UM  |
| AT1G74720 | UM  | UM   | UM  | UM  | UM  | UM  | UM   | UM  |
| AT1G74730 | UM  | UM   | UM  | UM  | UM  | UM  | UM   | UM  |
| AT1G74740 | UM  | UM   | UM  | UM  | UM  | UM  | UM   | UM  |
| AT1G74750 | gbM | gbM  | gbM | gbM | gbM | gbM | gbM  | gbM |
| AT1G74770 | UM  | UM   | UM  | UM  | UM  | UM  | mCHH | UM  |
| AT1G74780 | UM  | gbM  | UM  | UM  | UM  | UM  | UM   | UM  |
| AT1G74790 | UM  | gbM  | gbM | gbM | UM  | UM  | gbM  | UM  |
| AT1G74800 | UM  | UM   | UM  | UM  | UM  | UM  | UM   | UM  |
| AT1G74810 | UM  | UM   | UM  | UM  | UM  | UM  | UM   | UM  |
| AT1G74820 | UM  | UM   | UM  | UM  | UM  | UM  | UM   | UM  |
| AT1G74830 | UM  | UM   | UM  | UM  | UM  | UM  | UM   | UM  |
| AT1G74840 | UM  | UM   | UM  | UM  | UM  | UM  | UM   | UM  |
| AT1G74850 | UM  | UM   | UM  | UM  | UM  | UM  | UM   | UM  |
| AT1G74860 | UM  | UM   | UM  | UM  | UM  | UM  | UM   | UM  |
| AT1G74870 | UM  | UM   | UM  | UM  | UM  | UM  | mCHH | UM  |
| AT1G74875 | UM  | UM   | UM  | UM  | UM  | UM  | UM   | UM  |
| AT1G74880 | UM  | UM   | UM  | UM  | UM  | UM  | UM   | UM  |
| AT1G74890 | UM  | UM   | UM  | UM  | UM  | UM  | UM   | UM  |
| AT1G74900 | UM  | UM   | UM  | UM  | UM  | UM  | UM   | UM  |
| AT1G74910 | UM  | UM   | UM  | UM  | UM  | UM  | UM   | UM  |
| AT1G74920 | UM  | UM   | UM  | UM  | UM  | UM  | UM   | UM  |
| AT1G74929 | UM  | UM   | UM  | UM  | UM  | UM  | UM   | UM  |
| AT1G74930 | UM  | UM   | UM  | UM  | UM  | UM  | UM   | UM  |
| AT1G74940 | UM  | UM   | UM  | UM  | UM  | UM  | UM   | UM  |
| AT1G74950 | UM  | UM   | UM  | UM  | UM  | UM  | UM   | UM  |
| AT1G74960 | UM  | mCHH | UM  | UM  | UM  | UM  | UM   | UM  |
| AT1G74970 | UM  | UM   | UM  | UM  | UM  | UM  | UM   | UM  |
| AT1G74990 | UM  | UM   | UM  | UM  | UM  | UM  | UM   | UM  |
| AT1G75000 | UM  | UM   | UM  | UM  | UM  | UM  | UM   | UM  |
| AT1G75010 | UM  | mCHH | UM  | UM  | UM  | UM  | UM   | UM  |
| AT1G75020 | gbM | gbM  | gbM | UM  | UM  | UM  | gbM  | UM  |
| AT1G75030 | UM  | UM   | UM  | UM  | UM  | UM  | UM   | UM  |
| AT1G75040 | UM  | UM   | UM  | UM  | UM  | UM  | UM   | UM  |
| AT1G75050 | UM  | UM   | UM  | UM  | UM  | UM  | UM   | UM  |
| AT1G75060 | UM  | UM   | UM  | UM  | UM  | UM  | UM   | UM  |
| AT1G75080 | UM  | UM   | UM  | UM  | UM  | UM  | UM   | UM  |
| AT1G75090 | UM  | UM   | UM  | UM  | UM  | UM  | UM   | UM  |
| AT1G75100 | UM  | UM   | UM  | UM  | UM  | UM  | UM   | UM  |
| AT1G75110 | UM  | UM   | UM  | UM  | UM  | UM  | UM   | UM  |
| AT1G75120 | gbM | gbM  | gbM | gbM | gbM | gbM | gbM  | gbM |
| AT1G75130 | UM  | UM   | UM  | UM  | UM  | UM  | UM   | UM  |
| AT1G75140 | UM  | UM   | UM  | UM  | UM  | UM  | UM   | UM  |
| AT1G75150 | UM  | mCHH | UM  | UM  | UM  | UM  | mCHH | UM  |

|           |      |      |      |     |     |     |      |     |
|-----------|------|------|------|-----|-----|-----|------|-----|
| AT1G75160 | UM   | UM   | UM   | UM  | UM  | UM  | UM   | UM  |
| AT1G75170 | UM   | UM   | UM   | UM  | UM  | UM  | UM   | UM  |
| AT1G75180 | UM   | UM   | UM   | UM  | UM  | UM  | UM   | UM  |
| AT1G75190 | UM   | UM   | UM   | UM  | UM  | UM  | mCHH | UM  |
| AT1G75200 | UM   | UM   | UM   | UM  | UM  | UM  | UM   | UM  |
| AT1G75210 | gbM  | gbM  | UM   | UM  | UM  | UM  | mCHH | UM  |
| AT1G75220 | UM   | UM   | UM   | UM  | UM  | UM  | UM   | UM  |
| AT1G75230 | UM   | UM   | UM   | UM  | UM  | UM  | UM   | UM  |
| AT1G75240 | UM   | UM   | UM   | UM  | UM  | UM  | UM   | UM  |
| AT1G75250 | UM   | UM   | UM   | UM  | UM  | UM  | UM   | UM  |
| AT1G75260 | UM   | UM   | UM   | UM  | UM  | UM  | UM   | UM  |
| AT1G75270 | UM   | UM   | UM   | UM  | UM  | UM  | UM   | UM  |
| AT1G75280 | UM   | UM   | UM   | UM  | UM  | UM  | UM   | UM  |
| AT1G75290 | UM   | UM   | UM   | UM  | UM  | UM  | UM   | UM  |
| AT1G75300 | UM   | UM   | UM   | UM  | UM  | UM  | UM   | UM  |
| AT1G75310 | mCHH | mCHH | mCHH | UM  | UM  | UM  | mCHH | UM  |
| AT1G75330 | UM   | UM   | UM   | UM  | UM  | UM  | UM   | UM  |
| AT1G75335 | UM   | UM   | UM   | UM  | UM  | UM  | mCHH | UM  |
| AT1G75340 | UM   | UM   | UM   | UM  | UM  | UM  | mCHH | UM  |
| AT1G75350 | UM   | UM   | UM   | UM  | UM  | UM  | UM   | UM  |
| AT1G75360 | UM   | UM   | UM   | UM  | UM  | UM  | UM   | UM  |
| AT1G75370 | UM   | UM   | UM   | UM  | UM  | UM  | UM   | UM  |
| AT1G75380 | UM   | UM   | UM   | UM  | UM  | UM  | UM   | UM  |
| AT1G75388 | UM   | UM   | UM   | UM  | UM  | UM  | UM   | UM  |
| AT1G75390 | UM   | UM   | UM   | UM  | UM  | UM  | UM   | UM  |
| AT1G75400 | gbM  | gbM  | gbM  | gbM | gbM | gbM | gbM  | gbM |
| AT1G75410 | UM   | UM   | UM   | UM  | UM  | UM  | mCHH | UM  |
| AT1G75420 | UM   | UM   | UM   | UM  | UM  | UM  | UM   | UM  |
| AT1G75430 | UM   | UM   | UM   | UM  | UM  | UM  | UM   | UM  |
| AT1G75440 | UM   | UM   | UM   | UM  | UM  | UM  | UM   | UM  |
| AT1G75450 | UM   | UM   | UM   | UM  | UM  | UM  | UM   | UM  |
| AT1G75460 | UM   | UM   | UM   | UM  | UM  | UM  | UM   | UM  |
| AT1G75470 | UM   | UM   | UM   | UM  | UM  | UM  | UM   | UM  |
| AT1G75490 | UM   | UM   | UM   | UM  | UM  | UM  | UM   | UM  |
| AT1G75500 | UM   | UM   | UM   | UM  | UM  | UM  | UM   | UM  |
| AT1G75510 | UM   | UM   | UM   | UM  | UM  | UM  | UM   | UM  |
| AT1G75520 | UM   | UM   | UM   | UM  | UM  | UM  | UM   | UM  |
| AT1G75530 | UM   | UM   | UM   | UM  | UM  | UM  | UM   | UM  |
| AT1G75540 | UM   | UM   | UM   | UM  | UM  | UM  | UM   | UM  |
| AT1G75550 | UM   | UM   | UM   | UM  | UM  | UM  | UM   | UM  |
| AT1G75560 | gbM  | gbM  | gbM  | gbM | UM  | gbM | gbM  | gbM |
| AT1G75580 | UM   | UM   | UM   | UM  | UM  | UM  | UM   | UM  |
| AT1G75590 | UM   | UM   | UM   | UM  | UM  | UM  | UM   | UM  |
| AT1G75600 | UM   | UM   | UM   | UM  | UM  | UM  | UM   | UM  |
| AT1G75620 | UM   | UM   | UM   | UM  | UM  | UM  | UM   | UM  |
| AT1G75630 | UM   | UM   | UM   | UM  | UM  | UM  | UM   | UM  |
| AT1G75640 | UM   | UM   | UM   | UM  | UM  | UM  | UM   | UM  |
| AT1G75660 | gbM  | mCHH | UM   | UM  | UM  | UM  | mCHH | UM  |

|           |     |      |    |    |    |    |      |    |
|-----------|-----|------|----|----|----|----|------|----|
| AT1G75670 | UM  | UM   | UM | UM | UM | UM | UM   | UM |
| AT1G75680 | UM  | UM   | UM | UM | UM | UM | UM   | UM |
| AT1G75690 | UM  | UM   | UM | UM | UM | UM | UM   | UM |
| AT1G75700 | UM  | UM   | UM | UM | UM | UM | UM   | UM |
| AT1G75710 | UM  | UM   | UM | UM | UM | UM | UM   | UM |
| AT1G75717 | UM  | UM   | UM | UM | UM | UM | UM   | UM |
| AT1G75720 | UM  | UM   | UM | UM | UM | UM | UM   | UM |
| AT1G75730 | UM  | UM   | UM | UM | UM | UM | UM   | UM |
| AT1G75750 | UM  | UM   | UM | UM | UM | UM | UM   | UM |
| AT1G75760 | UM  | UM   | UM | UM | UM | UM | UM   | UM |
| AT1G75770 | UM  | UM   | UM | UM | UM | UM | UM   | UM |
| AT1G75780 | UM  | UM   | UM | UM | UM | UM | UM   | UM |
| AT1G75790 | UM  | UM   | UM | UM | UM | UM | UM   | UM |
| AT1G75800 | UM  | UM   | UM | UM | UM | UM | UM   | UM |
| AT1G75810 | UM  | UM   | UM | UM | UM | UM | UM   | UM |
| AT1G75820 | UM  | UM   | UM | UM | UM | UM | UM   | UM |
| AT1G75830 | UM  | UM   | UM | UM | UM | UM | UM   | UM |
| AT1G75840 | UM  | UM   | UM | UM | UM | UM | UM   | UM |
| AT1G75850 | gbM | mCHH | UM | UM | UM | UM | gbM  | UM |
| AT1G75860 | UM  | UM   | UM | UM | UM | UM | mCHH | UM |
| AT1G75870 | UM  | UM   | UM | UM | UM | UM | UM   | UM |
| AT1G75880 | UM  | UM   | UM | UM | UM | UM | mCHH | UM |
| AT1G75890 | UM  | UM   | UM | UM | UM | UM | mCHH | UM |
| AT1G75900 | UM  | UM   | UM | UM | UM | UM | UM   | UM |
| AT1G75910 | UM  | UM   | UM | UM | UM | UM | UM   | UM |
| AT1G75920 | UM  | UM   | UM | UM | UM | UM | UM   | UM |
| AT1G75930 | UM  | UM   | UM | UM | UM | UM | UM   | UM |
| AT1G75940 | UM  | UM   | UM | UM | UM | UM | UM   | UM |
| AT1G75950 | UM  | UM   | UM | UM | UM | UM | UM   | UM |
| AT1G75960 | UM  | UM   | UM | UM | UM | UM | UM   | UM |
| AT1G75980 | UM  | UM   | UM | UM | UM | UM | UM   | UM |
| AT1G75990 | UM  | UM   | UM | UM | UM | UM | UM   | UM |
| AT1G76010 | UM  | UM   | UM | UM | UM | UM | mCHH | UM |
| AT1G76020 | UM  | UM   | UM | UM | UM | UM | UM   | UM |
| AT1G76030 | UM  | UM   | UM | UM | UM | UM | UM   | UM |
| AT1G76040 | UM  | UM   | UM | UM | UM | UM | UM   | UM |
| AT1G76050 | UM  | UM   | UM | UM | UM | UM | mCHH | UM |
| AT1G76060 | UM  | UM   | UM | UM | UM | UM | UM   | UM |
| AT1G76065 | UM  | UM   | UM | UM | UM | UM | UM   | UM |
| AT1G76070 | UM  | UM   | UM | UM | UM | UM | UM   | UM |
| AT1G76080 | UM  | UM   | UM | UM | UM | UM | UM   | UM |
| AT1G76090 | UM  | UM   | UM | UM | UM | UM | UM   | UM |
| AT1G76100 | UM  | UM   | UM | UM | UM | UM | UM   | UM |
| AT1G76110 | UM  | UM   | UM | UM | UM | UM | UM   | UM |
| AT1G76120 | UM  | UM   | UM | UM | UM | UM | UM   | UM |
| AT1G76130 | UM  | UM   | UM | UM | UM | UM | UM   | UM |
| AT1G76140 | UM  | UM   | UM | UM | UM | UM | mCHH | UM |
| AT1G76150 | UM  | UM   | UM | UM | UM | UM | UM   | UM |



|           |      |      |      |     |     |     |      |     |
|-----------|------|------|------|-----|-----|-----|------|-----|
| AT1G76630 | UM   | UM   | UM   | UM  | UM  | UM  | mCHH | UM  |
| AT1G76640 | UM   | UM   | UM   | UM  | UM  | UM  | UM   | UM  |
| AT1G76650 | UM   | UM   | UM   | UM  | UM  | UM  | UM   | UM  |
| AT1G76660 | UM   | UM   | UM   | UM  | UM  | UM  | UM   | UM  |
| AT1G76670 | UM   | UM   | UM   | UM  | UM  | UM  | UM   | UM  |
| AT1G76680 | UM   | UM   | UM   | UM  | UM  | UM  | UM   | UM  |
| AT1G76690 | UM   | UM   | UM   | UM  | UM  | UM  | UM   | UM  |
| AT1G76700 | UM   | UM   | UM   | UM  | UM  | UM  | UM   | UM  |
| AT1G76705 | UM   | UM   | UM   | UM  | UM  | UM  | UM   | UM  |
| AT1G76710 | gbM  | gbM  | gbM  | gbM | gbM | gbM | gbM  | gbM |
| AT1G76720 | mCHH | mCHH | UM   | UM  | UM  | UM  | mCHH | UM  |
| AT1G76728 | UM   | UM   | UM   | UM  | UM  | UM  | UM   | UM  |
| AT1G76730 | UM   | UM   | UM   | UM  | UM  | UM  | UM   | UM  |
| AT1G76740 | UM   | UM   | UM   | UM  | UM  | UM  | mCHH | UM  |
| AT1G76750 | UM   | UM   | UM   | UM  | UM  | UM  | UM   | UM  |
| AT1G76760 | UM   | UM   | UM   | UM  | UM  | UM  | UM   | UM  |
| AT1G76770 | mCHH | mCHH | mCHH | UM  | UM  | UM  | mCHH | UM  |
| AT1G76780 | mCHH | mCHH | mCHH | UM  | UM  | UM  | mCHH | UM  |
| AT1G76790 | UM   | UM   | UM   | UM  | UM  | UM  | UM   | UM  |
| AT1G76800 | UM   | UM   | UM   | UM  | UM  | UM  | UM   | UM  |
| AT1G76810 | mCHG | mCHH | gbM  | gbM | gbM | gbM | mCHH | gbM |
| AT1G76820 | mCHH | mCHH | mCHG | UM  | UM  | UM  | mCHH | UM  |
| AT1G76830 | UM   | UM   | UM   | UM  | UM  | UM  | UM   | UM  |
| AT1G76840 | UM   | UM   | UM   | UM  | UM  | UM  | UM   | UM  |
| AT1G76850 | UM   | UM   | UM   | UM  | UM  | UM  | mCHH | UM  |
| AT1G76860 | UM   | UM   | UM   | UM  | UM  | UM  | UM   | UM  |
| AT1G76870 | UM   | UM   | UM   | UM  | UM  | UM  | UM   | UM  |
| AT1G76880 | UM   | mCHH | UM   | UM  | UM  | UM  | mCHH | UM  |
| AT1G76890 | UM   | UM   | UM   | UM  | UM  | UM  | UM   | UM  |
| AT1G76900 | gbM  | gbM  | gbM  | gbM | gbM | gbM | gbM  | gbM |
| AT1G76910 | UM   | UM   | UM   | UM  | UM  | UM  | UM   | UM  |
| AT1G76920 | UM   | UM   | UM   | UM  | UM  | UM  | UM   | UM  |
| AT1G76930 | UM   | UM   | UM   | UM  | UM  | UM  | UM   | UM  |
| AT1G76940 | UM   | UM   | UM   | UM  | UM  | UM  | UM   | UM  |
| AT1G76950 | gbM  | gbM  | gbM  | gbM | gbM | gbM | gbM  | gbM |
| AT1G76952 | UM   | UM   | UM   | UM  | UM  | UM  | UM   | UM  |
| AT1G76954 | UM   | UM   | UM   | UM  | UM  | UM  | UM   | UM  |
| AT1G76955 | UM   | UM   | UM   | UM  | UM  | UM  | UM   | UM  |
| AT1G76960 | UM   | UM   | UM   | UM  | UM  | UM  | UM   | UM  |
| AT1G76965 | UM   | UM   | UM   | UM  | UM  | UM  | UM   | UM  |
| AT1G76970 | UM   | UM   | UM   | UM  | UM  | UM  | UM   | UM  |
| AT1G76980 | UM   | UM   | UM   | UM  | UM  | UM  | UM   | UM  |
| AT1G76990 | UM   | UM   | UM   | UM  | UM  | UM  | mCHH | UM  |
| AT1G76994 | UM   | UM   | UM   | UM  | UM  | UM  | UM   | UM  |
| AT1G77000 | UM   | UM   | UM   | UM  | UM  | UM  | UM   | UM  |
| AT1G77010 | UM   | UM   | UM   | UM  | UM  | UM  | UM   | UM  |
| AT1G77020 | UM   | UM   | UM   | UM  | UM  | UM  | UM   | UM  |
| AT1G77030 | gbM  | gbM  | UM   | UM  | UM  | UM  | UM   | UM  |





|           |      |      |      |      |      |      |      |      |
|-----------|------|------|------|------|------|------|------|------|
| AT1G77525 | UM   |
| AT1G77530 | UM   |
| AT1G77540 | UM   |
| AT1G77550 | UM   | UM   | UM   | UM   | UM   | UM   | mCHH | UM   |
| AT1G77570 | UM   |
| AT1G77580 | mCHH | mCHH | mCHH | UM   | UM   | UM   | mCHH | UM   |
| AT1G77590 | gbM  | gbM  | gbM  | gbM  | UM   | UM   | gbM  | UM   |
| AT1G77600 | gbM  | gbM  | gbM  | gbM  | gbM  | gbM  | mCHH | gbM  |
| AT1G77610 | UM   |
| AT1G77620 | UM   | UM   | UM   | UM   | UM   | UM   | mCHH | UM   |
| AT1G77630 | UM   |
| AT1G77640 | UM   |
| AT1G77650 | UM   |
| AT1G77655 | UM   |
| AT1G77660 | UM   |
| AT1G77670 | UM   |
| AT1G77680 | gbM  | mCHH | gbM  | gbM  | gbM  | gbM  | gbM  | gbM  |
| AT1G77682 | UM   |
| AT1G77690 | UM   |
| AT1G77700 | UM   |
| AT1G77710 | UM   |
| AT1G77720 | UM   | UM   | UM   | UM   | UM   | UM   | mCHH | UM   |
| AT1G77730 | UM   |
| AT1G77740 | UM   |
| AT1G77746 | UM   |
| AT1G77750 | UM   |
| AT1G77760 | UM   |
| AT1G77765 | UM   |
| AT1G77770 | UM   |
| AT1G77780 | UM   |
| AT1G77790 | UM   |
| AT1G77800 | gbM  | gbM  | gbM  | gbM  | gbM  | gbM  | mCHH | gbM  |
| AT1G77810 | UM   |
| AT1G77815 | mCHH |
| AT1G77830 | UM   |
| AT1G77840 | UM   |
| AT1G77850 | UM   |
| AT1G77855 | UM   |
| AT1G77860 | UM   |
| AT1G77870 | UM   |
| AT1G77880 | UM   |
| AT1G77885 | UM   |
| AT1G77890 | UM   |
| AT1G77910 | UM   |
| AT1G77920 | UM   | UM   | UM   | UM   | UM   | UM   | mCHH | UM   |
| AT1G77930 | mCHH | mCHH | mCHG | UM   | UM   | UM   | mCHH | UM   |
| AT1G77932 | UM   |
| AT1G77940 | UM   | mCHH | mCHH | UM   | UM   | UM   | mCHH | UM   |

|           |      |      |      |    |    |    |      |     |
|-----------|------|------|------|----|----|----|------|-----|
| AT1G77950 | UM   | UM   | UM   | UM | UM | UM | UM   | UM  |
| AT1G77960 | mCHH | mCHG | mCHH | UM | UM | UM | mCHH | UM  |
| AT1G77980 | mCHH | mCHH | mCHG | UM | UM | UM | mCHH | UM  |
| AT1G77990 | UM   | UM   | UM   | UM | UM | UM | UM   | UM  |
| AT1G78000 | UM   | UM   | UM   | UM | UM | UM | UM   | UM  |
| AT1G78010 | UM   | UM   | UM   | UM | UM | UM | UM   | UM  |
| AT1G78020 | UM   | UM   | UM   | UM | UM | UM | UM   | UM  |
| AT1G78030 | UM   | UM   | UM   | UM | UM | UM | UM   | UM  |
| AT1G78040 | UM   | UM   | UM   | UM | UM | UM | UM   | UM  |
| AT1G78050 | UM   | UM   | UM   | UM | UM | UM | UM   | UM  |
| AT1G78060 | UM   | UM   | UM   | UM | UM | UM | UM   | UM  |
| AT1G78070 | UM   | UM   | UM   | UM | UM | UM | UM   | UM  |
| AT1G78080 | UM   | UM   | UM   | UM | UM | UM | UM   | UM  |
| AT1G78090 | UM   | UM   | UM   | UM | UM | UM | UM   | UM  |
| AT1G78100 | UM   | UM   | UM   | UM | UM | UM | UM   | UM  |
| AT1G78110 | UM   | UM   | UM   | UM | UM | UM | UM   | UM  |
| AT1G78120 | UM   | UM   | UM   | UM | UM | UM | UM   | UM  |
| AT1G78130 | UM   | UM   | UM   | UM | UM | UM | UM   | UM  |
| AT1G78140 | UM   | UM   | UM   | UM | UM | UM | UM   | UM  |
| AT1G78150 | UM   | UM   | UM   | UM | UM | UM | UM   | UM  |
| AT1G78160 | UM   | UM   | UM   | UM | UM | UM | mCHH | UM  |
| AT1G78170 | UM   | UM   | UM   | UM | UM | UM | UM   | UM  |
| AT1G78172 | UM   | UM   | UM   | UM | UM | UM | UM   | UM  |
| AT1G78180 | UM   | UM   | UM   | UM | UM | UM | UM   | UM  |
| AT1G78190 | UM   | UM   | UM   | UM | UM | UM | UM   | UM  |
| AT1G78200 | UM   | UM   | UM   | UM | UM | UM | UM   | UM  |
| AT1G78210 | UM   | UM   | UM   | UM | UM | UM | UM   | UM  |
| AT1G78220 | UM   | UM   | UM   | UM | UM | UM | UM   | UM  |
| AT1G78230 | UM   | UM   | UM   | UM | UM | UM | mCHH | UM  |
| AT1G78240 | UM   | UM   | UM   | UM | UM | UM | UM   | UM  |
| AT1G78260 | UM   | UM   | UM   | UM | UM | UM | UM   | UM  |
| AT1G78270 | UM   | UM   | UM   | UM | UM | UM | UM   | UM  |
| AT1G78280 | gbM  | mCHH | gbM  | UM | UM | UM | mCHH | gbM |
| AT1G78290 | UM   | UM   | UM   | UM | UM | UM | UM   | UM  |
| AT1G78300 | UM   | UM   | UM   | UM | UM | UM | UM   | UM  |
| AT1G78310 | UM   | UM   | UM   | UM | UM | UM | UM   | UM  |
| AT1G78320 | UM   | UM   | UM   | UM | UM | UM | UM   | UM  |
| AT1G78340 | UM   | UM   | UM   | UM | UM | UM | UM   | UM  |
| AT1G78360 | UM   | UM   | UM   | UM | UM | UM | UM   | UM  |
| AT1G78370 | UM   | UM   | UM   | UM | UM | UM | UM   | UM  |
| AT1G78380 | UM   | UM   | UM   | UM | UM | UM | UM   | UM  |
| AT1G78390 | UM   | UM   | UM   | UM | UM | UM | UM   | UM  |
| AT1G78400 | UM   | UM   | UM   | UM | UM | UM | UM   | UM  |
| AT1G78410 | UM   | UM   | UM   | UM | UM | UM | UM   | UM  |
| AT1G78420 | UM   | UM   | UM   | UM | UM | UM | UM   | UM  |
| AT1G78430 | UM   | UM   | UM   | UM | UM | UM | UM   | UM  |
| AT1G78440 | UM   | UM   | UM   | UM | UM | UM | UM   | UM  |
| AT1G78450 | UM   | UM   | UM   | UM | UM | UM | UM   | UM  |





|           |      |      |     |     |     |     |      |     |
|-----------|------|------|-----|-----|-----|-----|------|-----|
| AT1G79380 | gbM  | mCHH | gbM | gbM | UM  | gbM | gbM  | gbM |
| AT1G79390 | UM   | UM   | UM  | UM  | UM  | UM  | UM   | UM  |
| AT1G79400 | UM   | UM   | UM  | UM  | UM  | UM  | UM   | UM  |
| AT1G79410 | UM   | UM   | UM  | UM  | UM  | UM  | UM   | UM  |
| AT1G79420 | UM   | UM   | UM  | UM  | UM  | UM  | UM   | UM  |
| AT1G79430 | UM   | UM   | UM  | UM  | UM  | UM  | UM   | UM  |
| AT1G79440 | UM   | UM   | UM  | UM  | UM  | UM  | UM   | UM  |
| AT1G79450 | UM   | UM   | UM  | UM  | UM  | UM  | UM   | UM  |
| AT1G79460 | UM   | UM   | UM  | UM  | UM  | UM  | mCHH | UM  |
| AT1G79470 | UM   | UM   | UM  | UM  | UM  | UM  | UM   | UM  |
| AT1G79480 | UM   | UM   | UM  | UM  | UM  | UM  | UM   | UM  |
| AT1G79490 | gbM  | gbM  | gbM | gbM | UM  | gbM | gbM  | gbM |
| AT1G79500 | UM   | UM   | UM  | UM  | UM  | UM  | UM   | UM  |
| AT1G79510 | UM   | UM   | UM  | UM  | UM  | UM  | UM   | UM  |
| AT1G79520 | UM   | UM   | UM  | UM  | UM  | UM  | UM   | UM  |
| AT1G79530 | gbM  | gbM  | gbM | UM  | UM  | UM  | mCHH | UM  |
| AT1G79540 | gbM  | gbM  | gbM | UM  | gbM | UM  | gbM  | gbM |
| AT1G79550 | UM   | UM   | UM  | UM  | UM  | UM  | UM   | UM  |
| AT1G79560 | mCHH | gbM  | gbM | gbM | gbM | gbM | gbM  | gbM |
| AT1G79570 | gbM  | gbM  | gbM | gbM | gbM | gbM | mCHH | gbM |
| AT1G79580 | UM   | UM   | UM  | UM  | UM  | UM  | UM   | UM  |
| AT1G79590 | gbM  | gbM  | gbM | gbM | gbM | UM  | gbM  | gbM |
| AT1G79600 | UM   | UM   | UM  | UM  | UM  | UM  | UM   | UM  |
| AT1G79610 | UM   | UM   | UM  | UM  | UM  | UM  | mCHH | UM  |
| AT1G79620 | UM   | UM   | UM  | UM  | UM  | UM  | UM   | UM  |
| AT1G79630 | UM   | UM   | UM  | UM  | UM  | UM  | UM   | UM  |
| AT1G79640 | UM   | UM   | UM  | UM  | UM  | UM  | UM   | UM  |
| AT1G79650 | UM   | UM   | UM  | UM  | UM  | UM  | UM   | UM  |
| AT1G79660 | UM   | UM   | UM  | UM  | UM  | UM  | UM   | UM  |
| AT1G79670 | UM   | UM   | UM  | UM  | UM  | UM  | UM   | UM  |
| AT1G79680 | UM   | UM   | UM  | UM  | UM  | UM  | UM   | UM  |
| AT1G79690 | UM   | UM   | UM  | UM  | UM  | UM  | mCHH | UM  |
| AT1G79700 | UM   | UM   | UM  | UM  | UM  | UM  | UM   | UM  |
| AT1G79710 | UM   | UM   | UM  | UM  | UM  | UM  | UM   | UM  |
| AT1G79720 | UM   | UM   | UM  | UM  | UM  | UM  | UM   | UM  |
| AT1G79730 | UM   | UM   | UM  | UM  | UM  | UM  | UM   | UM  |
| AT1G79740 | UM   | UM   | UM  | UM  | UM  | UM  | UM   | UM  |
| AT1G79750 | UM   | UM   | UM  | UM  | UM  | UM  | UM   | UM  |
| AT1G79760 | UM   | UM   | UM  | UM  | UM  | UM  | UM   | UM  |
| AT1G79770 | UM   | UM   | UM  | UM  | UM  | UM  | UM   | UM  |
| AT1G79780 | UM   | UM   | UM  | UM  | UM  | UM  | UM   | UM  |
| AT1G79790 | UM   | UM   | UM  | UM  | UM  | UM  | UM   | UM  |
| AT1G79800 | UM   | UM   | UM  | UM  | UM  | UM  | UM   | UM  |
| AT1G79810 | UM   | UM   | UM  | UM  | UM  | UM  | UM   | UM  |
| AT1G79820 | UM   | UM   | UM  | UM  | UM  | UM  | UM   | UM  |
| AT1G79830 | gbM  | mCHH | gbM | gbM | gbM | gbM | mCHH | gbM |
| AT1G79840 | UM   | UM   | UM  | UM  | UM  | UM  | UM   | UM  |
| AT1G79850 | UM   | UM   | UM  | UM  | UM  | UM  | UM   | UM  |



|           |      |      |     |     |     |     |      |     |
|-----------|------|------|-----|-----|-----|-----|------|-----|
| AT1G80340 | UM   | UM   | UM  | UM  | UM  | UM  | UM   | UM  |
| AT1G80350 | UM   | gbM  | UM  | UM  | UM  | UM  | gbM  | UM  |
| AT1G80360 | UM   | UM   | UM  | UM  | UM  | UM  | UM   | UM  |
| AT1G80370 | UM   | UM   | UM  | UM  | UM  | UM  | UM   | UM  |
| AT1G80380 | UM   | UM   | UM  | UM  | UM  | UM  | UM   | UM  |
| AT1G80390 | UM   | UM   | UM  | UM  | UM  | UM  | UM   | UM  |
| AT1G80400 | UM   | UM   | UM  | UM  | UM  | UM  | UM   | UM  |
| AT1G80410 | gbM  | mCHH | gbM | gbM | gbM | gbM | mCHH | gbM |
| AT1G80420 | UM   | UM   | UM  | UM  | UM  | UM  | mCHH | UM  |
| AT1G80440 | UM   | UM   | UM  | UM  | UM  | UM  | UM   | UM  |
| AT1G80450 | UM   | UM   | UM  | UM  | UM  | UM  | UM   | UM  |
| AT1G80460 | UM   | UM   | UM  | UM  | UM  | UM  | UM   | UM  |
| AT1G80470 | UM   | UM   | UM  | UM  | UM  | UM  | UM   | UM  |
| AT1G80480 | UM   | UM   | UM  | UM  | UM  | UM  | UM   | UM  |
| AT1G80490 | gbM  | gbM  | gbM | gbM | gbM | gbM | mCHH | gbM |
| AT1G80500 | UM   | UM   | UM  | UM  | UM  | UM  | UM   | UM  |
| AT1G80510 | UM   | UM   | UM  | UM  | UM  | UM  | UM   | UM  |
| AT1G80520 | UM   | UM   | UM  | UM  | UM  | UM  | UM   | UM  |
| AT1G80530 | UM   | UM   | UM  | UM  | UM  | UM  | UM   | UM  |
| AT1G80540 | UM   | UM   | UM  | UM  | UM  | UM  | UM   | UM  |
| AT1G80550 | UM   | UM   | UM  | UM  | UM  | UM  | UM   | UM  |
| AT1G80555 | UM   | UM   | UM  | UM  | UM  | UM  | UM   | UM  |
| AT1G80560 | UM   | UM   | UM  | UM  | UM  | UM  | UM   | UM  |
| AT1G80570 | UM   | UM   | UM  | UM  | UM  | UM  | UM   | UM  |
| AT1G80580 | UM   | UM   | UM  | UM  | UM  | UM  | UM   | UM  |
| AT1G80590 | UM   | UM   | UM  | UM  | UM  | UM  | UM   | UM  |
| AT1G80600 | UM   | UM   | UM  | UM  | UM  | UM  | UM   | UM  |
| AT1G80610 | UM   | UM   | UM  | UM  | UM  | UM  | UM   | UM  |
| AT1G80620 | UM   | UM   | UM  | UM  | UM  | UM  | UM   | UM  |
| AT1G80630 | UM   | UM   | UM  | UM  | UM  | UM  | UM   | UM  |
| AT1G80640 | UM   | UM   | UM  | UM  | UM  | UM  | UM   | UM  |
| AT1G80650 | UM   | UM   | UM  | UM  | UM  | UM  | UM   | UM  |
| AT1G80660 | UM   | UM   | UM  | UM  | UM  | UM  | mCHH | UM  |
| AT1G80670 | UM   | UM   | UM  | UM  | UM  | UM  | gbM  | UM  |
| AT1G80680 | gbM  | gbM  | gbM | gbM | gbM | gbM | gbM  | gbM |
| AT1G80690 | UM   | UM   | UM  | UM  | UM  | UM  | UM   | UM  |
| AT1G80700 | UM   | UM   | UM  | UM  | UM  | UM  | UM   | UM  |
| AT1G80710 | UM   | UM   | UM  | UM  | UM  | UM  | UM   | UM  |
| AT1G80720 | UM   | UM   | UM  | UM  | UM  | UM  | UM   | UM  |
| AT1G80730 | UM   | UM   | UM  | UM  | UM  | UM  | UM   | UM  |
| AT1G80740 | UM   | UM   | UM  | UM  | UM  | UM  | UM   | UM  |
| AT1G80745 | UM   | UM   | UM  | UM  | UM  | UM  | UM   | UM  |
| AT1G80750 | UM   | UM   | UM  | UM  | UM  | UM  | UM   | gbM |
| AT1G80760 | UM   | UM   | UM  | UM  | UM  | UM  | UM   | UM  |
| AT1G80770 | UM   | UM   | UM  | UM  | UM  | UM  | UM   | UM  |
| AT1G80780 | UM   | UM   | UM  | UM  | UM  | UM  | UM   | UM  |
| AT1G80790 | UM   | UM   | UM  | UM  | UM  | UM  | mCHH | UM  |
| AT1G80810 | mCHH | mCHH | UM  | UM  | UM  | UM  | mCHH | UM  |





|           |      |      |      |     |     |     |      |     |
|-----------|------|------|------|-----|-----|-----|------|-----|
| AT2G01300 | UM   | UM   | UM   | UM  | UM  | UM  | UM   | UM  |
| AT2G01310 | mCHH | mCHH | mCHH | UM  | gbM | gbM | mCHH | UM  |
| AT2G01320 | gbM  | gbM  | gbM  | gbM | gbM | gbM | gbM  | gbM |
| AT2G01330 | UM   | UM   | UM   | UM  | UM  | UM  | UM   | UM  |
| AT2G01340 | UM   | UM   | UM   | UM  | UM  | UM  | UM   | UM  |
| AT2G01350 | gbM  | gbM  | UM   | UM  | UM  | UM  | gbM  | UM  |
| AT2G01360 | UM   | UM   | UM   | UM  | UM  | UM  | UM   | UM  |
| AT2G01370 | gbM  | gbM  | gbM  | gbM | UM  | UM  | gbM  | UM  |
| AT2G01390 | UM   | UM   | UM   | UM  | UM  | UM  | UM   | UM  |
| AT2G01400 | UM   | UM   | UM   | UM  | UM  | UM  | UM   | UM  |
| AT2G01410 | UM   | UM   | UM   | UM  | UM  | UM  | UM   | UM  |
| AT2G01420 | UM   | UM   | UM   | UM  | UM  | UM  | UM   | UM  |
| AT2G01430 | UM   | UM   | UM   | UM  | UM  | UM  | UM   | UM  |
| AT2G01440 | gbM  | gbM  | gbM  | gbM | gbM | UM  | gbM  | gbM |
| AT2G01450 | gbM  | mCHH | gbM  | gbM | UM  | UM  | gbM  | UM  |
| AT2G01460 | gbM  | mCHH | gbM  | gbM | gbM | gbM | mCHH | gbM |
| AT2G01470 | UM   | UM   | UM   | UM  | UM  | UM  | UM   | UM  |
| AT2G01480 | gbM  | UM   | gbM  | UM  | UM  | UM  | gbM  | UM  |
| AT2G01490 | UM   | UM   | UM   | UM  | UM  | UM  | mCHH | UM  |
| AT2G01500 | UM   | UM   | UM   | UM  | UM  | UM  | UM   | UM  |
| AT2G01505 | UM   | UM   | UM   | UM  | UM  | UM  | UM   | UM  |
| AT2G01510 | UM   | UM   | UM   | UM  | UM  | UM  | UM   | UM  |
| AT2G01520 | UM   | UM   | UM   | UM  | UM  | UM  | UM   | UM  |
| AT2G01530 | UM   | UM   | UM   | UM  | UM  | UM  | UM   | UM  |
| AT2G01540 | UM   | UM   | UM   | UM  | UM  | UM  | UM   | UM  |
| AT2G01554 | UM   | UM   | UM   | UM  | UM  | UM  | UM   | UM  |
| AT2G01560 | UM   | UM   | UM   | UM  | UM  | UM  | mCHH | UM  |
| AT2G01570 | UM   | UM   | UM   | UM  | UM  | UM  | UM   | UM  |
| AT2G01580 | UM   | UM   | UM   | UM  | UM  | UM  | UM   | UM  |
| AT2G01590 | UM   | UM   | UM   | UM  | UM  | UM  | UM   | UM  |
| AT2G01600 | UM   | gbM  | UM   | UM  | UM  | UM  | UM   | UM  |
| AT2G01610 | UM   | UM   | UM   | UM  | UM  | UM  | UM   | UM  |
| AT2G01620 | UM   | UM   | UM   | UM  | UM  | UM  | UM   | UM  |
| AT2G01630 | gbM  | gbM  | gbM  | gbM | UM  | UM  | gbM  | UM  |
| AT2G01640 | UM   | UM   | UM   | UM  | UM  | UM  | UM   | UM  |
| AT2G01650 | UM   | UM   | UM   | UM  | UM  | UM  | UM   | UM  |
| AT2G01660 | UM   | UM   | UM   | UM  | UM  | UM  | UM   | UM  |
| AT2G01667 | UM   | UM   | UM   | UM  | UM  | UM  | UM   | UM  |
| AT2G01670 | UM   | UM   | UM   | UM  | UM  | UM  | UM   | UM  |
| AT2G01680 | gbM  | gbM  | gbM  | gbM | gbM | gbM | gbM  | gbM |
| AT2G01690 | gbM  | gbM  | gbM  | gbM | gbM | gbM | mCHH | gbM |
| AT2G01710 | UM   | UM   | UM   | UM  | UM  | UM  | UM   | UM  |
| AT2G01720 | UM   | UM   | UM   | UM  | UM  | UM  | UM   | UM  |
| AT2G01730 | UM   | UM   | UM   | UM  | UM  | UM  | UM   | UM  |
| AT2G01735 | UM   | UM   | UM   | UM  | UM  | UM  | UM   | UM  |
| AT2G01740 | gbM  | gbM  | gbM  | UM  | UM  | UM  | gbM  | UM  |
| AT2G01750 | gbM  | gbM  | UM   | gbM | UM  | UM  | gbM  | gbM |
| AT2G01755 | UM   | UM   | UM   | UM  | UM  | UM  | UM   | UM  |

|           |      |      |      |      |      |      |      |      |
|-----------|------|------|------|------|------|------|------|------|
| AT2G01760 | UM   |
| AT2G01770 | UM   |
| AT2G01780 | UM   |
| AT2G01790 | mCHG | UM   |
| AT2G01800 | mCHH | mCHH | mCHG | UM   | UM   | UM   | mCHH | UM   |
| AT2G01810 | UM   |
| AT2G01818 | UM   |
| AT2G01820 | gbM  |
| AT2G01830 | gbM  | gbM  | gbM  | gbM  | gbM  | gbM  | mCHH | gbM  |
| AT2G01850 | UM   |
| AT2G01860 | UM   |
| AT2G01870 | UM   |
| AT2G01880 | UM   |
| AT2G01890 | UM   |
| AT2G01900 | UM   |
| AT2G01905 | UM   | UM   | UM   | UM   | UM   | UM   | mCHH | UM   |
| AT2G01910 | UM   |
| AT2G01913 | UM   |
| AT2G01918 | UM   | UM   | UM   | UM   | UM   | UM   | mCHH | UM   |
| AT2G01920 | UM   | gbM  | UM   | UM   | UM   | UM   | mCHH | UM   |
| AT2G01930 | UM   |
| AT2G01940 | UM   |
| AT2G01950 | gbM  | gbM  | UM   | gbM  | UM   | UM   | mCHH | UM   |
| AT2G01960 | UM   |
| AT2G01970 | gbM  |
| AT2G01980 | gbM  | mCHH | gbM  | gbM  | gbM  | gbM  | mCHH | gbM  |
| AT2G01990 | UM   |
| AT2G02000 | UM   |
| AT2G02010 | UM   |
| AT2G02020 | UM   |
| AT2G02023 | UM   |
| AT2G02026 | UM   |
| AT2G02030 | UM   |
| AT2G02040 | gbM  |
| AT2G02050 | UM   |
| AT2G02060 | UM   |
| AT2G02061 | UM   |
| AT2G02070 | UM   |
| AT2G02080 | UM   |
| AT2G02090 | gbM  | mCHH | gbM  | gbM  | gbM  | gbM  | gbM  | gbM  |
| AT2G02100 | UM   |
| AT2G02103 | mCHH |
| AT2G02120 | UM   |
| AT2G02130 | UM   |
| AT2G02140 | UM   |
| AT2G02147 | UM   |
| AT2G02148 | UM   |
| AT2G02150 | gbM  | mCHH | gbM  | UM   | UM   | UM   | mCHH | UM   |

|           |      |      |      |      |      |      |      |      |
|-----------|------|------|------|------|------|------|------|------|
| AT2G02160 | gbM  | mCHH | gbM  | gbM  | gbM  | gbM  | mCHH | gbM  |
| AT2G02170 | gbM  |
| AT2G02180 | UM   |
| AT2G02220 | gbM  |
| AT2G02230 | UM   |
| AT2G02240 | mCHH | mCHH | UM   | UM   | UM   | UM   | mCHH | UM   |
| AT2G02250 | UM   |
| AT2G02280 | mCHH | mCHH | mCHH | UM   | UM   | UM   | mCHH | mCHH |
| AT2G02290 | UM   |
| AT2G02300 | UM   |
| AT2G02310 | UM   |
| AT2G02320 | UM   |
| AT2G02340 | mCHH | mCHH | mCHH | UM   | UM   | mCHG | mCHH | mCHG |
| AT2G02350 | gbM  | gbM  | UM   | UM   | UM   | UM   | gbM  | UM   |
| AT2G02360 | UM   |
| AT2G02370 | gbM  | gbM  | UM   | gbM  | gbM  | gbM  | gbM  | UM   |
| AT2G02380 | UM   |
| AT2G02390 | UM   |
| AT2G02400 | UM   |
| AT2G02410 | UM   |
| AT2G02440 | mCHG | mCHH | mCHH | mCHG | mCHG | mCHG | mCHH | mCHG |
| AT2G02450 | UM   |
| AT2G02470 | mCHH | UM   |
| AT2G02480 | gbM  | gbM  | gbM  | gbM  | gbM  | gbM  | mCHH | gbM  |
| AT2G02490 | mCHH | mCHH | mCHH | mCHG | mCHG | mCHG | mCHH | mCHG |
| AT2G02498 | mCHG | mCHG | mCHG | UM   | UM   | UM   | mCHH | UM   |
| AT2G02500 | UM   | UM   | UM   | UM   | UM   | UM   | mCHH | UM   |
| AT2G02510 | UM   |
| AT2G02515 | UM   |
| AT2G02520 | mCHH |
| AT2G02540 | UM   |
| AT2G02550 | mCHH | mCHH | mCHH | mCHG | mCHH | mCHH | mCHH | mCHH |
| AT2G02560 | gbM  | gbM  | gbM  | gbM  | gbM  | gbM  | mCHH | gbM  |
| AT2G02570 | gbM  | gbM  | gbM  | gbM  | gbM  | UM   | gbM  | UM   |
| AT2G02580 | UM   | UM   | UM   | UM   | UM   | UM   | mCHH | UM   |
| AT2G02590 | UM   |
| AT2G02610 | UM   |
| AT2G02620 | UM   |
| AT2G02630 | UM   |
| AT2G02640 | UM   |
| AT2G02650 | UM   | UM   | UM   | UM   | UM   | UM   | mCHH | UM   |
| AT2G02660 | UM   |
| AT2G02680 | UM   | UM   | UM   | UM   | UM   | UM   | mCHH | UM   |
| AT2G02690 | UM   |
| AT2G02700 | UM   |
| AT2G02710 | UM   |
| AT2G02720 | gbM  | gbM  | gbM  | gbM  | gbM  | gbM  | mCHH | gbM  |
| AT2G02730 | gbM  | gbM  | gbM  | UM   | UM   | UM   | gbM  | UM   |

|           |      |      |      |      |      |      |      |      |
|-----------|------|------|------|------|------|------|------|------|
| AT2G02740 | UM   |
| AT2G02750 | UM   |
| AT2G02760 | gbM  | gbM  | gbM  | gbM  | gbM  | UM   | gbM  | gbM  |
| AT2G02770 | UM   |
| AT2G02780 | UM   |
| AT2G02790 | gbM  | mCHG | gbM  | gbM  | gbM  | gbM  | mCHH | gbM  |
| AT2G02795 | mCHH | mCHH | mCHH | mCHG | mCHH | mCHG | mCHH | mCHH |
| AT2G02800 | UM   |
| AT2G02810 | UM   |
| AT2G02820 | UM   |
| AT2G02835 | mCHH |
| AT2G02840 | mCHH |
| AT2G02850 | UM   |
| AT2G02860 | gbM  | gbM  | UM   | UM   | UM   | UM   | gbM  | UM   |
| AT2G02870 | gbM  | gbM  | gbM  | gbM  | gbM  | UM   | gbM  | UM   |
| AT2G02880 | UM   | UM   | UM   | UM   | UM   | UM   | mCHH | UM   |
| AT2G02890 | UM   |
| AT2G02910 | UM   |
| AT2G02930 | UM   |
| AT2G02950 | UM   |
| AT2G02955 | UM   |
| AT2G02960 | UM   | UM   | UM   | UM   | gbM  | gbM  | UM   | gbM  |
| AT2G02970 | UM   |
| AT2G02980 | UM   |
| AT2G02990 | UM   |
| AT2G03000 | UM   | UM   | UM   | UM   | UM   | UM   | mCHH | UM   |
| AT2G03010 | UM   |
| AT2G03020 | UM   |
| AT2G03030 | UM   |
| AT2G03040 | UM   |
| AT2G03050 | UM   |
| AT2G03060 | UM   |
| AT2G03070 | UM   |
| AT2G03090 | UM   |
| AT2G03110 | UM   |
| AT2G03120 | UM   | UM   | UM   | UM   | UM   | UM   | mCHH | UM   |
| AT2G03130 | UM   |
| AT2G03140 | gbM  | mCHH | gbM  | gbM  | gbM  | gbM  | mCHH | gbM  |
| AT2G03150 | mCHH | mCHH | mCHH | gbM  | gbM  | gbM  | mCHH | gbM  |
| AT2G03160 | UM   |
| AT2G03170 | UM   |
| AT2G03180 | mCHH | mCHH | mCHH | mCHG | mCHG | mCHG | mCHH | mCHH |
| AT2G03190 | UM   |
| AT2G03200 | UM   |
| AT2G03210 | UM   |
| AT2G03220 | gbM  |
| AT2G03230 | UM   |
| AT2G03240 | gbM  | UM   | UM   | UM   | UM   | UM   | mCHH | UM   |

|           |      |      |      |      |      |      |      |      |
|-----------|------|------|------|------|------|------|------|------|
| AT2G03250 | UM   | mCHH | UM   | UM   | UM   | UM   | mCHH | UM   |
| AT2G03260 | UM   |
| AT2G03270 | gbM  | gbM  | gbM  | gbM  | gbM  | gbM  | mCHH | gbM  |
| AT2G03280 | UM   |
| AT2G03290 | UM   |
| AT2G03300 | UM   |
| AT2G03310 | UM   |
| AT2G03320 | UM   |
| AT2G03330 | UM   |
| AT2G03340 | UM   |
| AT2G03350 | UM   |
| AT2G03360 | UM   |
| AT2G03370 | UM   |
| AT2G03380 | UM   |
| AT2G03390 | UM   |
| AT2G03410 | UM   |
| AT2G03420 | UM   |
| AT2G03430 | UM   |
| AT2G03440 | UM   |
| AT2G03450 | UM   |
| AT2G03460 | UM   |
| AT2G03470 | UM   |
| AT2G03480 | gbM  |
| AT2G03500 | UM   |
| AT2G03505 | UM   |
| AT2G03510 | UM   |
| AT2G03520 | gbM  | gbM  | UM   | UM   | UM   | UM   | gbM  | UM   |
| AT2G03530 | gbM  |
| AT2G03550 | UM   |
| AT2G03560 | UM   |
| AT2G03565 | UM   |
| AT2G03570 | mCHH | mCHG |
| AT2G03580 | UM   |
| AT2G03590 | UM   |
| AT2G03600 | UM   |
| AT2G03610 | UM   |
| AT2G03620 | gbM  |
| AT2G03630 | gbM  | mCHH | gbM  | gbM  | gbM  | gbM  | gbM  | gbM  |
| AT2G03640 | gbM  |
| AT2G03667 | gbM  | gbM  | gbM  | gbM  | gbM  | gbM  | mCHH | gbM  |
| AT2G03670 | gbM  |
| AT2G03680 | UM   | gbM  | UM   | UM   | UM   | UM   | UM   | UM   |
| AT2G03690 | UM   | gbM  | UM   | UM   | UM   | UM   | UM   | UM   |
| AT2G03710 | UM   |
| AT2G03720 | UM   |
| AT2G03730 | gbM  |
| AT2G03740 | UM   |
| AT2G03750 | UM   |



|           |      |      |      |      |      |      |      |      |
|-----------|------|------|------|------|------|------|------|------|
| AT2G04190 | UM   |
| AT2G04220 | UM   |
| AT2G04230 | UM   | UM   | UM   | UM   | UM   | UM   | mCHH | UM   |
| AT2G04235 | gbM  | mCHH | gbM  | gbM  | gbM  | gbM  | mCHH | UM   |
| AT2G04240 | UM   |
| AT2G04270 | gbM  | mCHH | gbM  | gbM  | gbM  | gbM  | gbM  | gbM  |
| AT2G04280 | UM   |
| AT2G04300 | UM   |
| AT2G04305 | gbM  | gbM  | gbM  | UM   | UM   | gbM  | mCHH | UM   |
| AT2G04340 | UM   |
| AT2G04350 | gbM  |
| AT2G04360 | UM   |
| AT2G04370 | mCHH | mCHG | mCHH | mCHG | mCHH | mCHG | mCHH | mCHG |
| AT2G04378 | UM   | gbM  | gbM  | UM   | UM   | UM   | gbM  | UM   |
| AT2G04380 | UM   |
| AT2G04390 | gbM  |
| AT2G04395 | UM   |
| AT2G04400 | UM   |
| AT2G04410 | gbM  | gbM  | gbM  | UM   | UM   | UM   | gbM  | UM   |
| AT2G04420 | UM   |
| AT2G04425 | mCHH | mCHH | mCHH | mCHG | mCHH | mCHG | mCHH | mCHG |
| AT2G04430 | UM   | UM   | UM   | UM   | UM   | gbM  | UM   | UM   |
| AT2G04440 | UM   |
| AT2G04450 | UM   | UM   | UM   | UM   | UM   | UM   | mCHH | UM   |
| AT2G04480 | UM   |
| AT2G04495 | UM   | UM   | UM   | UM   | UM   | UM   | mCHH | UM   |
| AT2G04500 | UM   |
| AT2G04515 | UM   |
| AT2G04520 | UM   |
| AT2G04530 | UM   |
| AT2G04540 | UM   |
| AT2G04550 | UM   |
| AT2G04560 | UM   | UM   | UM   | UM   | gbM  | gbM  | mCHH | gbM  |
| AT2G04570 | UM   |
| AT2G04620 | gbM  | gbM  | gbM  | UM   | UM   | UM   | mCHH | UM   |
| AT2G04622 | gbM  | mCHH | mCHH | gbM  | UM   | gbM  | mCHH | gbM  |
| AT2G04630 | UM   |
| AT2G04650 | mCHH | UM   |
| AT2G04660 | gbM  | gbM  | gbM  | gbM  | gbM  | gbM  | mCHH | gbM  |
| AT2G04675 | UM   |
| AT2G04680 | UM   |
| AT2G04690 | UM   |
| AT2G04700 | UM   |
| AT2G04740 | UM   |
| AT2G04750 | gbM  | mCHH | gbM  | UM   | gbM  | gbM  | mCHH | gbM  |
| AT2G04780 | UM   |
| AT2G04790 | UM   |
| AT2G04795 | UM   |







|           |      |         |      |         |         |         |         |      |         |
|-----------|------|---------|------|---------|---------|---------|---------|------|---------|
| AT2G06420 | mCHH | mCHH    | mCHH | mCHH    | mCHH    | mCHH    | mCHH    | mCHH | mCHH    |
| AT2G06500 | mCHH | mCHH    | mCHH | mCHH    | mCHH    | mCHH    | mCHH    | mCHH | mCHH    |
| AT2G06510 | gbM  | gbM     | gbM  | gbM     | gbM     | gbM     | gbM     | mCHG | gbM     |
| AT2G06520 | UM   | UM      | UM   | UM      | UM      | UM      | UM      | UM   | UM      |
| AT2G06530 | UM   | UM      | UM   | gbM     | gbM     | gbM     | gbM     | mCHG | gbM     |
| AT2G06541 | mCHH | mCHH    | mCHH | mCHH    | mCHH    | mCHH    | mCHH    | mCHH | mCHH    |
| AT2G06555 | mCHH | mCHH    | mCHH | mCHH    | mCHH    | mCHH    | mCHH    | mCHH | mCHH    |
| AT2G06570 | mCHH | mCHH    | mCHH | mCHH    | mCHH    | mCHH    | mCHH    | mCHH | mCHH    |
| AT2G06645 | mCHH | mCHH    | mCHH | mCHH    | mCHH    | mCHH    | mCHH    | mCHH | mCHH    |
| AT2G06667 | mCHH | mCHH    | mCHH | UM      | gbM     | gbM     | gbM     | mCHH | gbM     |
| AT2G06845 | mCHH | mCHH    | mCHH | mCHH    | mCHH    | mCHH    | mCHH    | mCHH | mCHH    |
| AT2G06850 | UM   | UM      | UM   | UM      | UM      | UM      | UM      | UM   | UM      |
| AT2G06904 | mCHH | mCHH    | mCHH | mCHH    | mCHH    | mCHH    | mCHH    | mCHH | mCHH    |
| AT2G06906 | mCHH | mCHH    | mCHH | mCHH    | mCHH    | mCHH    | mCHH    | mCHH | mCHH    |
| AT2G06908 | mCHH | mCHH    | mCHH | mCHH    | mCHH    | mCHH    | mCHH    | mCHH | mCHG    |
| AT2G06925 | UM   | UM      | UM   | UM      | UM      | UM      | UM      | UM   | UM      |
| AT2G06960 | mCHH | mCHH    | mCHH | gbM     | gbM     | mCHG    | mCHH    | mCHH | gbM     |
| AT2G06983 | UM   | UM      | UM   | UM      | UM      | UM      | UM      | UM   | UM      |
| AT2G06990 | gbM  | mCHH    | gbM  | gbM     | gbM     | gbM     | gbM     | mCHH | gbM     |
| AT2G07000 | UM   | UM      | UM   | UM      | UM      | UM      | UM      | UM   | UM      |
| AT2G07020 | mCHH | mCHH    | mCHH | mCHH    | mCHH    | mCHH    | mCHH    | mCHH | mCHH    |
| AT2G07040 | mCHH | mCHH    | mCHH | mCHH    | mCHH    | mCHH    | mCHH    | mCHH | mCHH    |
| AT2G07050 | gbM  | gbM     | gbM  | gbM     | gbM     | gbM     | gbM     | mCHH | gbM     |
| AT2G07110 | mCHH | mCHH    | mCHH | mCHG    | mCHH    | mCHG    | mCHH    | mCHH | mCHH    |
| AT2G07120 | mCHH | mCHH    | mCHH | mCHH    | mCHH    | mCHH    | mCHH    | mCHH | mCHH    |
| AT2G07140 | UM   | gbM     | UM   | UM      | UM      | UM      | UM      | gbM  | UM      |
| AT2G07170 | gbM  | gbM     | gbM  | gbM     | gbM     | gbM     | gbM     | mCHH | gbM     |
| AT2G07180 | UM   | UM      | UM   | UM      | UM      | UM      | UM      | UM   | UM      |
| AT2G07190 | mCHH | mCHH    | mCHH | mCHH    | mCHH    | mCHH    | mCHH    | mCHH | mCHH    |
| AT2G07200 | mCHH | mCHH    | mCHH | mCHH    | mCHH    | mCHH    | mCHH    | mCHH | mCHH    |
| AT2G07215 | mCHH | mCHH    | mCHH | mCHH    | mCHH    | mCHH    | mCHH    | mCHH | mCHH    |
| AT2G07240 | mCHH | mCHH    | mCHH | mCHH    | mCHH    | mCHH    | mCHH    | mCHH | mCHH    |
| AT2G07280 | mCHH | mCHH    | mCHH | mCHH    | mCHH    | mCHH    | mCHH    | mCHH | mCHH    |
| AT2G07290 | mCHH | mCHH    | mCHH | mCHH    | mCHH    | mCHH    | mCHH    | mCHH | mCHH    |
| AT2G07310 | mCHH | mCHH    | mCHH | mCHH    | mCHH    | mCHH    | mCHH    | mCHH | mCHH    |
| AT2G07340 | UM   | UM      | UM   | UM      | UM      | UM      | UM      | UM   | UM      |
| AT2G07360 | gbM  | gbM     | gbM  | gbM     | gbM     | gbM     | gbM     | gbM  | gbM     |
| AT2G07362 | mCHH | mCHH    | mCHH | mCHH    | mCHH    | mCHH    | mCHH    | mCHH | gbM     |
| AT2G07363 | mCHH | mCHH    | mCHH | mCHH    | mCHH    | mCHH    | mCHH    | mCHH | gbM     |
| AT2G07440 | mCHH | mCHH    | mCHH | mCHH    | mCHH    | mCHH    | mCHH    | mCHH | mCHH    |
| AT2G07505 | mCHH | mCHH    | mCHH | mCHH    | mCHH    | mCHH    | mCHH    | mCHH | mCHH    |
| AT2G07521 | mCHH | mCHH    | mCHG | gbM     | gbM     | gbM     | gbM     | mCHH | gbM     |
| AT2G07560 | mCHH | mCHH    | mCHH | mCHH    | mCHH    | mCHH    | mCHH    | mCHH | mCHH    |
| AT2G07599 | mCHH | mCHH    | mCHH | mCHH    | mCHH    | mCHH    | mCHH    | mCHH | mCHH    |
| AT2G07640 | mCHH | mCHH    | mCHG | UM      | gbM     | mCHH    | mCHH    | mCHH | mCHG    |
| AT2G07667 | mCHH | mCHH    | mCHH | mCHH    | mCHH    | mCHH    | mCHH    | mCHH | mCHH    |
| AT2G07669 | mCHH | mCHH    | mCHH | mCHH    | mCHH    | mCHH    | mCHH    | mCHH | mCHH    |
| AT2G07671 | UM   | unknown | UM   | unknown | unknown | unknown | unknown | UM   | unknown |





|           |      |      |      |      |      |      |      |      |      |
|-----------|------|------|------|------|------|------|------|------|------|
| AT2G11623 | mCHH |
| AT2G11626 | mCHH |
| AT2G11651 | mCHH |
| AT2G11773 | mCHH | mCHH | mCHH | UM   | UM   | UM   | mCHH | UM   | UM   |
| AT2G11778 | mCHH | gbM  |
| AT2G11810 | UM   | UM   | UM   | UM   | UM   | UM   | mCHH | UM   | UM   |
| AT2G11851 | mCHH |
| AT2G11890 | UM   |
| AT2G11891 | UM   |
| AT2G11910 | UM   | gbM  | UM   |
| AT2G12170 | UM   |
| AT2G12190 | UM   |
| AT2G12200 | mCHH | mCHH | mCHH | mCHH | gbM  | UM   | mCHH | UM   | UM   |
| AT2G12280 | mCHH | mCHH | mCHH | mCHH | gbM  | UM   | mCHH | mCHH | mCHH |
| AT2G12290 | mCHH |
| AT2G12400 | gbM  |
| AT2G12405 | mCHH | mCHG |
| AT2G12461 | UM   |
| AT2G12462 | UM   |
| AT2G12465 | UM   |
| AT2G12475 | UM   |
| AT2G12480 | UM   |
| AT2G12550 | gbM  |
| AT2G12557 | mCHH |
| AT2G12646 | UM   |
| AT2G12875 | mCHH |
| AT2G12880 | mCHH | mCHH | mCHH | gbM  | gbM  | mCHH | mCHH | mCHH | gbM  |
| AT2G12900 | mCHH |
| AT2G12905 | mCHH | mCHH | mCHH | mCHH | UM   | gbM  | mCHH | mCHH | gbM  |
| AT2G12935 | mCHH |
| AT2G12940 | mCHH |
| AT2G12945 | mCHH |
| AT2G12977 | mCHH | mCHG |
| AT2G13100 | gbM  | UM   |
| AT2G13125 | mCHH | mCHH | mCHG | mCHG | mCHH | mCHH | mCHH | mCHH | UM   |
| AT2G13126 | UM   |
| AT2G13150 | mCHH |
| AT2G13272 | mCHH |
| AT2G13273 | mCHH | UM   |
| AT2G13290 | gbM  | gbM  | gbM  | gbM  | gbM  | gbM  | mCHG | gbM  | gbM  |
| AT2G13295 | UM   |
| AT2G13350 | mCHH | mCHH | mCHH | gbM  | mCHG | mCHH | mCHH | mCHH | gbM  |
| AT2G13360 | UM   |
| AT2G13363 | mCHH | mCHH | mCHH | mCHG | mCHH | mCHH | mCHH | mCHH | mCHG |
| AT2G13370 | mCHH | mCHH | gbM  | gbM  | gbM  | gbM  | mCHH | mCHH | gbM  |
| AT2G13422 | UM   |
| AT2G13430 | mCHH |
| AT2G13440 | gbM  | gbM  | gbM  | gbM  | gbM  | gbM  | mCHG | UM   | UM   |

|           |      |      |      |      |      |      |      |      |
|-----------|------|------|------|------|------|------|------|------|
| AT2G13450 | mCHH |
| AT2G13463 | mCHH | UM   |
| AT2G13500 | mCHH |
| AT2G13510 | mCHH |
| AT2G13540 | gbM  | mCHH | gbM  | gbM  | gbM  | gbM  | gbM  | gbM  |
| AT2G13542 | UM   |
| AT2G13547 | mCHH | mCHH | mCHH | mCHG | mCHG | mCHG | mCHH | mCHG |
| AT2G13550 | UM   |
| AT2G13560 | gbM  |
| AT2G13570 | UM   |
| AT2G13600 | gbM  | gbM  | gbM  | UM   | UM   | UM   | mCHH | UM   |
| AT2G13610 | UM   |
| AT2G13620 | UM   |
| AT2G13623 | UM   |
| AT2G13630 | UM   |
| AT2G13640 | UM   |
| AT2G13650 | UM   |
| AT2G13660 | UM   |
| AT2G13680 | UM   |
| AT2G13690 | UM   |
| AT2G13720 | mCHH |
| AT2G13760 | mCHH | gbM  |
| AT2G13770 | mCHH |
| AT2G13790 | gbM  | gbM  | gbM  | UM   | UM   | UM   | gbM  | UM   |
| AT2G13800 | UM   | gbM  | UM   | UM   | UM   | UM   | UM   | UM   |
| AT2G13810 | UM   |
| AT2G13820 | mCHG | mCHG | mCHG | UM   | UM   | UM   | mCHH | UM   |
| AT2G13840 | gbM  | gbM  | gbM  | UM   | gbM  | gbM  | gbM  | gbM  |
| AT2G13895 | mCHH |
| AT2G13900 | UM   | UM   | UM   | UM   | UM   | UM   | mCHH | UM   |
| AT2G13950 | mCHH | mCHH | mCHH | UM   | UM   | UM   | mCHH | UM   |
| AT2G13960 | UM   |
| AT2G13980 | mCHH |
| AT2G14000 | mCHH |
| AT2G14045 | UM   |
| AT2G14050 | UM   |
| AT2G14060 | UM   |
| AT2G14070 | UM   | mCHH | UM   | UM   | UM   | UM   | mCHH | UM   |
| AT2G14080 | UM   | UM   | UM   | UM   | UM   | UM   | mCHH | UM   |
| AT2G14095 | UM   |
| AT2G14100 | UM   |
| AT2G14110 | UM   |
| AT2G14120 | gbM  | gbM  | gbM  | gbM  | gbM  | gbM  | mCHH | gbM  |
| AT2G14160 | UM   |
| AT2G14170 | gbM  |
| AT2G14206 | mCHH | mCHH | mCHH | mCHG | mCHH | mCHH | mCHH | mCHG |
| AT2G14210 | UM   |
| AT2G14247 | UM   |

|           |      |      |      |      |      |      |      |      |
|-----------|------|------|------|------|------|------|------|------|
| AT2G14255 | gbM  |
| AT2G14260 | gbM  |
| AT2G14270 | mCHH |
| AT2G14282 | UM   |
| AT2G14285 | UM   |
| AT2G14288 | mCHH |
| AT2G14289 | mCHH | mCHH | mCHH | UM   | mCHH | UM   | mCHH | mCHG |
| AT2G14290 | UM   |
| AT2G14365 | UM   |
| AT2G14378 | UM   |
| AT2G14390 | mCHH |
| AT2G14440 | mCHH | mCHH | mCHG | UM   | UM   | UM   | mCHH | mCHG |
| AT2G14460 | UM   |
| AT2G14500 | UM   |
| AT2G14510 | mCHH | mCHH | mCHH | UM   | mCHG | UM   | mCHH | mCHG |
| AT2G14520 | UM   |
| AT2G14530 | UM   | UM   | UM   | UM   | UM   | UM   | gbM  | UM   |
| AT2G14540 | mCHH |
| AT2G14560 | UM   |
| AT2G14580 | UM   |
| AT2G14610 | UM   |
| AT2G14620 | UM   |
| AT2G14635 | UM   |
| AT2G14660 | UM   |
| AT2G14670 | mCHH | mCHH | mCHH | UM   | UM   | UM   | mCHH | UM   |
| AT2G14680 | gbM  |
| AT2G14690 | gbM  | mCHH | gbM  | gbM  | gbM  | gbM  | mCHH | gbM  |
| AT2G14692 | UM   |
| AT2G14700 | mCHH | UM   |
| AT2G14710 | UM   |
| AT2G14720 | gbM  | gbM  | gbM  | gbM  | gbM  | gbM  | mCHG | gbM  |
| AT2G14740 | gbM  | gbM  | UM   | gbM  | gbM  | UM   | gbM  | UM   |
| AT2G14750 | UM   |
| AT2G14760 | UM   |
| AT2G14800 | UM   |
| AT2G14810 | UM   |
| AT2G14820 | gbM  | gbM  | gbM  | UM   | gbM  | UM   | gbM  | UM   |
| AT2G14830 | mCHH | UM   | UM   | UM   | UM   | UM   | mCHH | UM   |
| AT2G14835 | gbM  |
| AT2G14846 | UM   |
| AT2G14850 | gbM  |
| AT2G14860 | UM   |
| AT2G14870 | mCHH | mCHH | mCHH | mCHG | mCHH | mCHG | mCHH | mCHG |
| AT2G14880 | UM   |
| AT2G14890 | UM   |
| AT2G14900 | UM   |
| AT2G14910 | gbM  | gbM  | gbM  | gbM  | gbM  | gbM  | mCHH | gbM  |
| AT2G14920 | UM   |



|           |      |      |      |      |      |      |      |      |
|-----------|------|------|------|------|------|------|------|------|
| AT2G14935 | UM   |
| AT2G14960 | UM   |
| AT2G15000 | UM   |
| AT2G15010 | UM   |
| AT2G15020 | UM   |
| AT2G15025 | UM   |
| AT2G15029 | UM   |
| AT2G15042 | mCHH | mCHH | mCHH | gbM  | gbM  | gbM  | mCHH | gbM  |
| AT2G15050 | UM   |
| AT2G15080 | mCHH | UM   | UM   | UM   | UM   | UM   | mCHH | UM   |
| AT2G15090 | UM   |
| AT2G15110 | mCHH |
| AT2G15130 | UM   |
| AT2G15170 | mCHG | mCHG | UM   | UM   | UM   | UM   | mCHH | UM   |
| AT2G15180 | mCHH |
| AT2G15185 | mCHH | mCHH | mCHH | mCHG | mCHG | mCHG | mCHH | mCHG |
| AT2G15220 | UM   |
| AT2G15230 | gbM  | gbM  | gbM  | UM   | UM   | UM   | gbM  | UM   |
| AT2G15240 | gbM  | UM   |
| AT2G15260 | UM   |
| AT2G15270 | UM   | mCHH | UM   | UM   | UM   | UM   | UM   | UM   |
| AT2G15280 | UM   |
| AT2G15290 | UM   |
| AT2G15300 | UM   |
| AT2G15310 | UM   |
| AT2G15318 | UM   |
| AT2G15320 | UM   |
| AT2G15325 | UM   |
| AT2G15327 | UM   |
| AT2G15340 | mCHH | mCHH | mCHH | UM   | mCHH | UM   | mCHH | UM   |
| AT2G15345 | UM   |
| AT2G15350 | UM   | mCHG |
| AT2G15360 | UM   |
| AT2G15370 | UM   | gbM  | UM   | UM   | UM   | UM   | UM   | gbM  |
| AT2G15390 | UM   |
| AT2G15400 | UM   |
| AT2G15420 | mCHH |
| AT2G15430 | UM   |
| AT2G15440 | UM   |
| AT2G15450 | mCHH | mCHH | mCHH | mCHG | mCHH | mCHH | mCHH | mCHH |
| AT2G15460 | mCHH | mCHH | mCHH | mCHH | mCHG | mCHH | mCHH | mCHG |
| AT2G15470 | mCHH | mCHH | mCHH | mCHG | mCHH | mCHH | mCHH | mCHG |
| AT2G15480 | UM   |
| AT2G15490 | UM   |
| AT2G15500 | UM   |
| AT2G15530 | gbM  | gbM  | gbM  | gbM  | gbM  | gbM  | mCHH | gbM  |
| AT2G15535 | UM   |
| AT2G15560 | UM   | gbM  | UM   | gbM  | gbM  | UM   | gbM  | gbM  |



|           |      |      |      |      |      |      |      |      |
|-----------|------|------|------|------|------|------|------|------|
| AT2G16225 | UM   |
| AT2G16230 | gbM  | gbM  | UM   | UM   | UM   | UM   | gbM  | UM   |
| AT2G16250 | gbM  | gbM  | gbM  | gbM  | gbM  | gbM  | mCHH | gbM  |
| AT2G16270 | UM   |
| AT2G16280 | UM   |
| AT2G16290 | UM   |
| AT2G16300 | UM   |
| AT2G16340 | mCHH | mCHH | mCHH | gbM  | mCHG | UM   | mCHH | UM   |
| AT2G16360 | UM   |
| AT2G16365 | UM   |
| AT2G16370 | UM   |
| AT2G16380 | UM   | mCHH | UM   | UM   | UM   | UM   | UM   | UM   |
| AT2G16385 | UM   |
| AT2G16390 | gbM  |
| AT2G16400 | UM   |
| AT2G16405 | UM   | UM   | UM   | UM   | UM   | UM   | mCHH | UM   |
| AT2G16430 | gbM  |
| AT2G16440 | UM   |
| AT2G16450 | UM   |
| AT2G16460 | UM   |
| AT2G16485 | gbM  | mCHH | gbM  | gbM  | gbM  | gbM  | mCHH | gbM  |
| AT2G16490 | mCHH |
| AT2G16500 | UM   |
| AT2G16505 | UM   |
| AT2G16510 | UM   |
| AT2G16520 | UM   |
| AT2G16530 | gbM  |
| AT2G16535 | UM   |
| AT2G16570 | UM   |
| AT2G16575 | UM   |
| AT2G16580 | UM   |
| AT2G16586 | UM   | mCHH | UM   | UM   | UM   | UM   | UM   | UM   |
| AT2G16592 | UM   |
| AT2G16594 | UM   |
| AT2G16595 | UM   |
| AT2G16600 | UM   |
| AT2G16620 | mCHH | mCHH | mCHH | mCHG | mCHH | mCHH | mCHH | mCHH |
| AT2G16630 | UM   | UM   | UM   | UM   | UM   | UM   | gbM  | UM   |
| AT2G16640 | gbM  | mCHH | gbM  | gbM  | gbM  | gbM  | mCHH | gbM  |
| AT2G16650 | UM   |
| AT2G16660 | UM   |
| AT2G16668 | UM   |
| AT2G16676 | mCHH |
| AT2G16700 | UM   |
| AT2G16710 | UM   |
| AT2G16720 | UM   |
| AT2G16730 | UM   | UM   | UM   | UM   | UM   | UM   | mCHH | UM   |
| AT2G16740 | UM   |

|           |     |      |     |     |     |     |      |     |
|-----------|-----|------|-----|-----|-----|-----|------|-----|
| AT2G16750 | UM  | UM   | UM  | UM  | UM  | UM  | UM   | UM  |
| AT2G16760 | UM  | UM   | UM  | UM  | UM  | UM  | UM   | UM  |
| AT2G16770 | UM  | UM   | UM  | UM  | UM  | UM  | UM   | UM  |
| AT2G16780 | UM  | UM   | UM  | UM  | UM  | UM  | UM   | UM  |
| AT2G16790 | UM  | UM   | UM  | UM  | UM  | UM  | UM   | UM  |
| AT2G16800 | UM  | UM   | UM  | UM  | UM  | UM  | UM   | UM  |
| AT2G16810 | UM  | mCHH | UM  | UM  | UM  | UM  | UM   | UM  |
| AT2G16835 | UM  | UM   | UM  | UM  | UM  | UM  | UM   | UM  |
| AT2G16850 | UM  | UM   | UM  | UM  | UM  | UM  | UM   | UM  |
| AT2G16860 | gbM | gbM  | gbM | gbM | gbM | gbM | gbM  | gbM |
| AT2G16870 | UM  | UM   | UM  | UM  | UM  | UM  | mCHH | UM  |
| AT2G16880 | UM  | UM   | UM  | UM  | UM  | UM  | UM   | UM  |
| AT2G16881 | UM  | UM   | UM  | UM  | UM  | UM  | UM   | UM  |
| AT2G16890 | UM  | UM   | UM  | UM  | UM  | UM  | UM   | UM  |
| AT2G16900 | UM  | UM   | UM  | UM  | UM  | UM  | UM   | UM  |
| AT2G16910 | gbM | gbM  | gbM | UM  | gbM | UM  | gbM  | UM  |
| AT2G16920 | gbM | gbM  | gbM | gbM | gbM | gbM | mCHH | gbM |
| AT2G16930 | UM  | UM   | UM  | UM  | UM  | UM  | UM   | UM  |
| AT2G16940 | gbM | mCHH | gbM | gbM | gbM | gbM | mCHH | gbM |
| AT2G16950 | gbM | gbM  | gbM | gbM | gbM | gbM | gbM  | gbM |
| AT2G16955 | UM  | UM   | UM  | UM  | UM  | UM  | UM   | UM  |
| AT2G16960 | UM  | UM   | UM  | UM  | UM  | UM  | UM   | UM  |
| AT2G16970 | UM  | UM   | UM  | UM  | UM  | UM  | mCHH | UM  |
| AT2G16980 | UM  | UM   | UM  | UM  | UM  | UM  | UM   | UM  |
| AT2G16990 | UM  | UM   | UM  | UM  | UM  | UM  | mCHH | UM  |
| AT2G17000 | UM  | UM   | UM  | UM  | UM  | UM  | UM   | UM  |
| AT2G17010 | UM  | UM   | UM  | UM  | UM  | UM  | UM   | UM  |
| AT2G17020 | gbM | UM   | UM  | UM  | UM  | UM  | UM   | UM  |
| AT2G17030 | UM  | UM   | UM  | UM  | UM  | UM  | UM   | UM  |
| AT2G17033 | UM  | UM   | UM  | UM  | UM  | UM  | mCHG | UM  |
| AT2G17036 | gbM | gbM  | gbM | gbM | gbM | gbM | gbM  | gbM |
| AT2G17040 | UM  | UM   | UM  | UM  | UM  | UM  | UM   | UM  |
| AT2G17043 | UM  | UM   | UM  | UM  | UM  | UM  | UM   | UM  |
| AT2G17050 | UM  | UM   | UM  | UM  | UM  | UM  | mCHH | UM  |
| AT2G17055 | UM  | UM   | UM  | UM  | UM  | UM  | UM   | UM  |
| AT2G17060 | UM  | mCHH | UM  | UM  | UM  | UM  | UM   | UM  |
| AT2G17070 | UM  | UM   | UM  | UM  | UM  | UM  | UM   | UM  |
| AT2G17080 | UM  | UM   | UM  | UM  | UM  | UM  | UM   | UM  |
| AT2G17090 | UM  | UM   | UM  | UM  | UM  | UM  | UM   | UM  |
| AT2G17110 | UM  | UM   | UM  | UM  | UM  | UM  | mCHH | UM  |
| AT2G17120 | UM  | UM   | UM  | UM  | UM  | UM  | UM   | UM  |
| AT2G17130 | UM  | UM   | UM  | UM  | UM  | UM  | UM   | UM  |
| AT2G17140 | UM  | gbM  | UM  | UM  | UM  | UM  | UM   | UM  |
| AT2G17150 | gbM | gbM  | gbM | gbM | gbM | gbM | gbM  | gbM |
| AT2G17160 | UM  | UM   | UM  | UM  | UM  | UM  | UM   | UM  |
| AT2G17170 | UM  | UM   | UM  | UM  | UM  | UM  | UM   | UM  |
| AT2G17180 | UM  | UM   | UM  | UM  | UM  | UM  | UM   | UM  |
| AT2G17190 | gbM | gbM  | gbM | UM  | UM  | UM  | gbM  | UM  |

|           |      |      |      |      |      |      |      |      |
|-----------|------|------|------|------|------|------|------|------|
| AT2G17200 | UM   | gbM  | gbM  | UM   | UM   | UM   | gbM  | UM   |
| AT2G17210 | UM   |
| AT2G17220 | UM   |
| AT2G17230 | UM   |
| AT2G17240 | UM   |
| AT2G17250 | UM   |
| AT2G17260 | UM   |
| AT2G17265 | UM   |
| AT2G17270 | UM   |
| AT2G17280 | UM   |
| AT2G17290 | UM   |
| AT2G17300 | UM   |
| AT2G17305 | mCHH | mCHH | mCHH | mCHG | mCHH | mCHG | mCHH | mCHG |
| AT2G17310 | UM   |
| AT2G17320 | UM   |
| AT2G17340 | UM   |
| AT2G17350 | UM   |
| AT2G17360 | UM   |
| AT2G17370 | UM   |
| AT2G17380 | gbM  |
| AT2G17390 | UM   |
| AT2G17410 | gbM  |
| AT2G17420 | UM   |
| AT2G17430 | UM   |
| AT2G17440 | UM   |
| AT2G17442 | UM   |
| AT2G17450 | UM   |
| AT2G17470 | UM   |
| AT2G17480 | gbM  | gbM  | gbM  | UM   | gbM  | UM   | mCHH | UM   |
| AT2G17500 | UM   |
| AT2G17510 | gbM  | mCHH | gbM  | gbM  | gbM  | gbM  | mCHH | gbM  |
| AT2G17520 | UM   |
| AT2G17525 | UM   |
| AT2G17530 | gbM  | mCHH | UM   | gbM  | gbM  | UM   | UM   | gbM  |
| AT2G17540 | UM   |
| AT2G17550 | UM   | UM   | UM   | UM   | UM   | UM   | mCHH | UM   |
| AT2G17556 | UM   |
| AT2G17560 | UM   |
| AT2G17570 | gbM  |
| AT2G17580 | gbM  | gbM  | gbM  | gbM  | gbM  | gbM  | mCHH | gbM  |
| AT2G17590 | UM   |
| AT2G17600 | UM   | UM   | UM   | UM   | UM   | UM   | mCHH | UM   |
| AT2G17620 | UM   |
| AT2G17630 | UM   |
| AT2G17640 | UM   |
| AT2G17650 | gbM  | gbM  | gbM  | UM   | UM   | UM   | gbM  | UM   |
| AT2G17660 | UM   |
| AT2G17670 | UM   |

|           |      |      |      |      |      |      |      |      |
|-----------|------|------|------|------|------|------|------|------|
| AT2G17680 | UM   |
| AT2G17690 | UM   |
| AT2G17695 | UM   |
| AT2G17700 | UM   |
| AT2G17705 | UM   |
| AT2G17710 | UM   |
| AT2G17720 | UM   |
| AT2G17723 | UM   |
| AT2G17730 | UM   |
| AT2G17740 | UM   |
| AT2G17750 | UM   |
| AT2G17760 | gbM  | gbM  | UM   | UM   | gbM  | UM   | gbM  | UM   |
| AT2G17770 | UM   |
| AT2G17780 | UM   |
| AT2G17785 | UM   |
| AT2G17787 | UM   |
| AT2G17790 | gbM  | gbM  | gbM  | gbM  | gbM  | UM   | gbM  | gbM  |
| AT2G17800 | UM   |
| AT2G17820 | UM   | mCHH | UM   | UM   | UM   | UM   | UM   | UM   |
| AT2G17830 | UM   |
| AT2G17840 | UM   |
| AT2G17845 | UM   |
| AT2G17850 | UM   |
| AT2G17860 | UM   |
| AT2G17870 | UM   |
| AT2G17880 | UM   |
| AT2G17890 | UM   |
| AT2G17900 | UM   |
| AT2G17920 | mCHH |
| AT2G17930 | mCHH | mCHH | gbM  | gbM  | gbM  | gbM  | mCHH | gbM  |
| AT2G17940 | UM   |
| AT2G17950 | UM   |
| AT2G17960 | UM   |
| AT2G17970 | UM   |
| AT2G17972 | UM   |
| AT2G17975 | UM   |
| AT2G17980 | UM   | UM   | UM   | UM   | gbM  | UM   | UM   | gbM  |
| AT2G17990 | UM   |
| AT2G18000 | UM   |
| AT2G18010 | UM   |
| AT2G18020 | UM   |
| AT2G18030 | UM   |
| AT2G18040 | UM   |
| AT2G18050 | UM   |
| AT2G18060 | UM   |
| AT2G18070 | UM   |
| AT2G18080 | UM   |
| AT2G18090 | gbM  | gbM  | UM   | gbM  | gbM  | gbM  | gbM  | gbM  |

|           |      |      |      |      |      |      |      |      |
|-----------|------|------|------|------|------|------|------|------|
| AT2G18100 | gbM  | gbM  | gbM  | UM   | UM   | gbM  | gbM  | gbM  |
| AT2G18110 | UM   |
| AT2G18120 | UM   |
| AT2G18130 | mCHH | mCHH | mCHH | mCHG | mCHH | mCHH | mCHH | mCHG |
| AT2G18140 | UM   |
| AT2G18150 | UM   |
| AT2G18160 | UM   |
| AT2G18162 | UM   |
| AT2G18170 | UM   | gbM  | UM   | UM   | UM   | UM   | UM   | UM   |
| AT2G18180 | UM   | UM   | UM   | UM   | UM   | UM   | mCHH | UM   |
| AT2G18190 | UM   |
| AT2G18193 | UM   |
| AT2G18196 | UM   |
| AT2G18200 | UM   |
| AT2G18210 | UM   |
| AT2G18220 | gbM  | gbM  | gbM  | gbM  | gbM  | gbM  | mCHH | gbM  |
| AT2G18230 | UM   | gbM  | UM   | UM   | UM   | UM   | UM   | UM   |
| AT2G18240 | UM   |
| AT2G18245 | UM   |
| AT2G18250 | UM   |
| AT2G18260 | UM   |
| AT2G18270 | UM   |
| AT2G18280 | UM   |
| AT2G18290 | UM   |
| AT2G18300 | UM   |
| AT2G18320 | mCHH | mCHH | mCHH | UM   | UM   | UM   | mCHH | UM   |
| AT2G18328 | UM   |
| AT2G18330 | gbM  | gbM  | gbM  | UM   | UM   | UM   | gbM  | UM   |
| AT2G18340 | UM   |
| AT2G18350 | UM   |
| AT2G18360 | UM   | UM   | UM   | UM   | UM   | UM   | mCHH | UM   |
| AT2G18370 | UM   |
| AT2G18380 | UM   |
| AT2G18390 | UM   |
| AT2G18400 | UM   |
| AT2G18410 | UM   |
| AT2G18420 | UM   |
| AT2G18450 | UM   |
| AT2G18460 | UM   |
| AT2G18465 | gbM  | UM   | UM   | gbM  | gbM  | UM   | gbM  | UM   |
| AT2G18470 | UM   |
| AT2G18480 | mCHH | mCHH | UM   | UM   | UM   | UM   | mCHH | UM   |
| AT2G18490 | UM   |
| AT2G18500 | UM   |
| AT2G18510 | UM   |
| AT2G18520 | UM   |
| AT2G18530 | mCHH |
| AT2G18540 | mCHH | mCHH | UM   | UM   | UM   | UM   | mCHH | UM   |





|           |      |      |      |      |      |      |      |      |
|-----------|------|------|------|------|------|------|------|------|
| AT2G19000 | UM   |
| AT2G19010 | UM   |
| AT2G19020 | UM   |
| AT2G19030 | gbM  |
| AT2G19040 | gbM  |
| AT2G19045 | gbM  | mCHG |
| AT2G19050 | UM   |
| AT2G19060 | UM   |
| AT2G19070 | UM   |
| AT2G19080 | UM   |
| AT2G19090 | gbM  |
| AT2G19110 | UM   | UM   | UM   | UM   | UM   | UM   | mCHH | UM   |
| AT2G19120 | gbM  |
| AT2G19130 | UM   | UM   | UM   | UM   | UM   | UM   | mCHH | UM   |
| AT2G19146 | mCHH | mCHH | mCHH | gbM  | mCHG | mCHG | mCHH | mCHG |
| AT2G19150 | UM   |
| AT2G19160 | gbM  |
| AT2G19170 | gbM  |
| AT2G19180 | UM   |
| AT2G19190 | UM   | mCHG | UM   | UM   | UM   | UM   | mCHH | UM   |
| AT2G19210 | UM   |
| AT2G19220 | UM   | UM   | UM   | UM   | UM   | UM   | mCHH | UM   |
| AT2G19230 | UM   |
| AT2G19240 | gbM  | gbM  | gbM  | UM   | UM   | UM   | gbM  | UM   |
| AT2G19260 | gbM  |
| AT2G19270 | UM   |
| AT2G19280 | UM   | UM   | UM   | UM   | UM   | UM   | gbM  | UM   |
| AT2G19290 | UM   | mCHH | UM   | UM   | UM   | UM   | UM   | UM   |
| AT2G19300 | mCHH | mCHG | mCHH | mCHG | gbM  | mCHG | mCHH | gbM  |
| AT2G19310 | UM   |
| AT2G19320 | UM   |
| AT2G19330 | gbM  |
| AT2G19340 | UM   |
| AT2G19350 | UM   |
| AT2G19360 | mCHH |
| AT2G19380 | mCHH | mCHH | gbM  | gbM  | gbM  | gbM  | mCHH | gbM  |
| AT2G19385 | UM   |
| AT2G19390 | mCHG | gbM  | gbM  | gbM  | gbM  | gbM  | mCHH | gbM  |
| AT2G19400 | UM   | UM   | UM   | UM   | UM   | UM   | mCHH | UM   |
| AT2G19410 | mCHH | UM   |
| AT2G19420 | mCHH | mCHH | mCHH | mCHG | mCHH | mCHG | mCHH | mCHG |
| AT2G19430 | UM   |
| AT2G19440 | UM   | gbM  | UM   | UM   | gbM  | UM   | gbM  | UM   |
| AT2G19450 | UM   |
| AT2G19460 | UM   |
| AT2G19470 | gbM  |
| AT2G19480 | UM   |
| AT2G19490 | UM   | gbM  | UM   | gbM  | UM   | UM   | mCHH | UM   |

|           |      |      |      |      |      |      |      |      |
|-----------|------|------|------|------|------|------|------|------|
| AT2G19500 | UM   |
| AT2G19510 | mCHH | mCHH | mCHH | mCHH | mCHH | mCHG | mCHH | mCHG |
| AT2G19520 | UM   | mCHH | UM   | UM   | UM   | UM   | mCHH | UM   |
| AT2G19530 | UM   | UM   | UM   | UM   | UM   | UM   | mCHH | UM   |
| AT2G19540 | gbM  | gbM  | UM   | UM   | gbM  | gbM  | UM   | UM   |
| AT2G19550 | UM   |
| AT2G19560 | UM   |
| AT2G19570 | UM   |
| AT2G19580 | UM   |
| AT2G19590 | UM   |
| AT2G19600 | gbM  | mCHH | gbM  | gbM  | UM   | UM   | mCHH | UM   |
| AT2G19610 | UM   |
| AT2G19620 | UM   |
| AT2G19630 | UM   |
| AT2G19640 | UM   |
| AT2G19650 | UM   |
| AT2G19660 | UM   |
| AT2G19670 | UM   |
| AT2G19680 | UM   |
| AT2G19690 | UM   |
| AT2G19700 | UM   |
| AT2G19710 | gbM  |
| AT2G19720 | UM   |
| AT2G19730 | UM   |
| AT2G19740 | UM   |
| AT2G19750 | UM   |
| AT2G19760 | UM   |
| AT2G19770 | UM   |
| AT2G19780 | UM   |
| AT2G19790 | UM   |
| AT2G19800 | UM   | UM   | UM   | UM   | UM   | UM   | mCHH | UM   |
| AT2G19802 | UM   |
| AT2G19810 | UM   |
| AT2G19820 | UM   |
| AT2G19830 | UM   |
| AT2G19850 | mCHH | mCHH | mCHH | mCHG | mCHH | mCHH | mCHH | mCHH |
| AT2G19860 | gbM  | UM   |
| AT2G19870 | gbM  | gbM  | gbM  | UM   | gbM  | UM   | mCHG | UM   |
| AT2G19880 | UM   | gbM  | gbM  | gbM  | gbM  | gbM  | gbM  | UM   |
| AT2G19890 | UM   |
| AT2G19893 | UM   |
| AT2G19900 | UM   |
| AT2G19910 | UM   |
| AT2G19920 | UM   | UM   | UM   | UM   | UM   | UM   | gbM  | UM   |
| AT2G19930 | gbM  | gbM  | UM   | UM   | UM   | UM   | gbM  | UM   |
| AT2G19940 | gbM  | gbM  | gbM  | gbM  | UM   | gbM  | gbM  | gbM  |
| AT2G19950 | gbM  | mCHH | gbM  | gbM  | gbM  | gbM  | mCHH | gbM  |
| AT2G19960 | mCHH | mCHH | mCHH | mCHG | mCHH | mCHG | mCHH | mCHG |

|           |      |      |     |     |     |     |      |     |
|-----------|------|------|-----|-----|-----|-----|------|-----|
| AT2G19970 | UM   | UM   | UM  | UM  | UM  | UM  | UM   | UM  |
| AT2G19980 | UM   | UM   | UM  | UM  | UM  | UM  | UM   | UM  |
| AT2G19990 | UM   | UM   | UM  | UM  | UM  | UM  | UM   | UM  |
| AT2G20000 | gbM  | gbM  | gbM | gbM | gbM | gbM | mCHH | gbM |
| AT2G20010 | gbM  | gbM  | gbM | gbM | gbM | gbM | gbM  | gbM |
| AT2G20020 | UM   | UM   | UM  | UM  | UM  | UM  | UM   | UM  |
| AT2G20030 | UM   | UM   | UM  | UM  | UM  | UM  | UM   | UM  |
| AT2G20050 | gbM  | gbM  | gbM | gbM | gbM | gbM | mCHH | gbM |
| AT2G20060 | gbM  | gbM  | gbM | gbM | gbM | gbM | gbM  | UM  |
| AT2G20070 | UM   | UM   | UM  | UM  | UM  | UM  | UM   | UM  |
| AT2G20080 | UM   | UM   | UM  | UM  | UM  | UM  | UM   | UM  |
| AT2G20100 | UM   | UM   | UM  | UM  | UM  | UM  | mCHH | UM  |
| AT2G20110 | UM   | UM   | UM  | UM  | UM  | UM  | UM   | UM  |
| AT2G20120 | UM   | UM   | UM  | UM  | UM  | UM  | UM   | UM  |
| AT2G20130 | UM   | UM   | UM  | UM  | UM  | UM  | UM   | UM  |
| AT2G20140 | UM   | UM   | UM  | UM  | UM  | UM  | UM   | UM  |
| AT2G20142 | UM   | UM   | UM  | UM  | UM  | UM  | UM   | UM  |
| AT2G20150 | UM   | UM   | UM  | UM  | UM  | UM  | UM   | UM  |
| AT2G20160 | UM   | UM   | UM  | UM  | UM  | UM  | UM   | UM  |
| AT2G20170 | UM   | UM   | UM  | UM  | UM  | UM  | UM   | UM  |
| AT2G20180 | UM   | UM   | UM  | UM  | UM  | UM  | UM   | UM  |
| AT2G20190 | gbM  | mCHH | gbM | gbM | gbM | gbM | mCHH | gbM |
| AT2G20208 | UM   | UM   | UM  | UM  | UM  | UM  | UM   | UM  |
| AT2G20210 | gbM  | gbM  | gbM | gbM | gbM | gbM | gbM  | gbM |
| AT2G20230 | UM   | UM   | UM  | UM  | UM  | UM  | UM   | UM  |
| AT2G20240 | UM   | UM   | UM  | UM  | UM  | UM  | UM   | UM  |
| AT2G20250 | UM   | UM   | UM  | UM  | UM  | UM  | UM   | UM  |
| AT2G20260 | UM   | UM   | UM  | UM  | UM  | UM  | UM   | UM  |
| AT2G20270 | UM   | UM   | UM  | UM  | UM  | UM  | UM   | UM  |
| AT2G20280 | gbM  | gbM  | UM  | gbM | UM  | gbM | mCHH | UM  |
| AT2G20290 | gbM  | mCHH | gbM | gbM | gbM | gbM | mCHH | gbM |
| AT2G20300 | gbM  | gbM  | gbM | gbM | gbM | gbM | gbM  | gbM |
| AT2G20310 | gbM  | gbM  | UM  | gbM | UM  | UM  | UM   | UM  |
| AT2G20320 | mCHH | gbM  | gbM | gbM | gbM | gbM | mCHH | gbM |
| AT2G20330 | UM   | UM   | UM  | UM  | UM  | UM  | UM   | UM  |
| AT2G20340 | UM   | gbM  | UM  | UM  | UM  | UM  | UM   | UM  |
| AT2G20350 | UM   | UM   | UM  | UM  | UM  | UM  | UM   | UM  |
| AT2G20360 | gbM  | UM   | UM  | UM  | UM  | UM  | UM   | UM  |
| AT2G20362 | UM   | UM   | UM  | UM  | UM  | UM  | UM   | UM  |
| AT2G20370 | gbM  | gbM  | gbM | gbM | gbM | gbM | gbM  | gbM |
| AT2G20380 | gbM  | gbM  | gbM | UM  | UM  | UM  | UM   | UM  |
| AT2G20390 | UM   | gbM  | UM  | UM  | UM  | UM  | UM   | UM  |
| AT2G20400 | gbM  | gbM  | gbM | UM  | UM  | UM  | gbM  | UM  |
| AT2G20410 | UM   | UM   | UM  | UM  | UM  | UM  | UM   | UM  |
| AT2G20420 | gbM  | gbM  | gbM | gbM | gbM | UM  | gbM  | UM  |
| AT2G20430 | UM   | UM   | UM  | UM  | UM  | UM  | UM   | UM  |
| AT2G20440 | UM   | UM   | UM  | UM  | UM  | UM  | mCHH | UM  |
| AT2G20450 | UM   | UM   | UM  | UM  | UM  | UM  | UM   | UM  |

|           |     |     |     |     |     |     |      |     |
|-----------|-----|-----|-----|-----|-----|-----|------|-----|
| AT2G20453 | UM  | UM  | UM  | UM  | UM  | UM  | mCHH | UM  |
| AT2G20463 | UM   | UM  |
| AT2G20465 | UM   | UM  |
| AT2G20470 | UM   | UM  |
| AT2G20480 | UM   | UM  |
| AT2G20490 | UM   | UM  |
| AT2G20495 | gbM | gbM | gbM | UM  | UM  | UM  | gbM  | UM  |
| AT2G20500 | UM   | UM  |
| AT2G20510 | UM   | UM  |
| AT2G20515 | UM   | UM  |
| AT2G20520 | UM   | UM  |
| AT2G20530 | gbM | gbM | gbM | gbM | UM  | gbM | gbM  | UM  |
| AT2G20540 | UM   | UM  |
| AT2G20550 | UM   | UM  |
| AT2G20560 | UM   | UM  |
| AT2G20562 | UM   | UM  |
| AT2G20570 | UM   | UM  |
| AT2G20580 | gbM | gbM | gbM | gbM | gbM | gbM | mCHH | gbM |
| AT2G20585 | UM   | UM  |
| AT2G20590 | UM   | UM  |
| AT2G20595 | UM   | UM  |
| AT2G20597 | UM   | UM  |
| AT2G20605 | UM   | UM  |
| AT2G20610 | UM   | UM  |
| AT2G20613 | gbM | UM  | UM  | UM  | UM  | UM  | UM   | UM  |
| AT2G20616 | UM   | UM  |
| AT2G20618 | UM   | UM  |
| AT2G20619 | UM   | UM  |
| AT2G20620 | UM   | UM  |
| AT2G20625 | UM   | UM  |
| AT2G20630 | UM   | UM  |
| AT2G20635 | UM   | UM  |
| AT2G20650 | gbM  | gbM |
| AT2G20660 | UM   | UM  |
| AT2G20670 | UM   | UM  |
| AT2G20680 | UM   | UM  |
| AT2G20690 | UM   | UM  |
| AT2G20700 | UM   | UM  |
| AT2G20710 | UM   | UM  |
| AT2G20720 | UM   | UM  |
| AT2G20725 | UM   | UM  |
| AT2G20740 | UM   | UM  |
| AT2G20750 | UM   | UM  |
| AT2G20760 | UM   | UM  |
| AT2G20770 | UM   | UM  |
| AT2G20780 | gbM  | gbM |
| AT2G20784 | UM   | UM  |
| AT2G20790 | gbM  | gbM |

|           |      |      |      |      |      |     |      |      |
|-----------|------|------|------|------|------|-----|------|------|
| AT2G20800 | UM   | UM   | UM   | UM   | UM   | UM  | UM   | UM   |
| AT2G20805 | mCHH | mCHH | mCHG | mCHH | mCHH | UM  | mCHH | mCHG |
| AT2G20810 | UM   | UM   | UM   | UM   | UM   | UM  | UM   | UM   |
| AT2G20815 | UM   | UM   | gbM  | UM   | gbM  | UM  | mCHH | UM   |
| AT2G20820 | UM   | UM   | UM   | UM   | UM   | UM  | UM   | UM   |
| AT2G20825 | UM   | UM   | UM   | UM   | UM   | UM  | UM   | UM   |
| AT2G20830 | UM   | UM   | UM   | UM   | UM   | UM  | UM   | UM   |
| AT2G20835 | UM   | UM   | UM   | UM   | UM   | UM  | UM   | UM   |
| AT2G20840 | UM   | UM   | UM   | UM   | UM   | UM  | UM   | UM   |
| AT2G20850 | UM   | UM   | UM   | UM   | UM   | UM  | mCHH | UM   |
| AT2G20860 | UM   | UM   | UM   | UM   | UM   | UM  | UM   | UM   |
| AT2G20870 | UM   | UM   | UM   | UM   | UM   | UM  | UM   | UM   |
| AT2G20875 | UM   | UM   | mCHH | UM   | UM   | UM  | UM   | UM   |
| AT2G20880 | UM   | UM   | UM   | UM   | UM   | UM  | UM   | UM   |
| AT2G20890 | UM   | UM   | UM   | UM   | UM   | UM  | UM   | UM   |
| AT2G20900 | UM   | UM   | UM   | UM   | UM   | UM  | UM   | UM   |
| AT2G20920 | UM   | UM   | UM   | UM   | UM   | UM  | UM   | UM   |
| AT2G20921 | UM   | UM   | UM   | UM   | UM   | UM  | UM   | UM   |
| AT2G20930 | UM   | UM   | UM   | UM   | UM   | UM  | UM   | UM   |
| AT2G20940 | UM   | UM   | UM   | UM   | UM   | UM  | UM   | UM   |
| AT2G20950 | UM   | UM   | UM   | UM   | UM   | UM  | UM   | UM   |
| AT2G20960 | UM   | UM   | UM   | UM   | UM   | UM  | UM   | UM   |
| AT2G20970 | gbM  | gbM  | UM   | UM   | UM   | gbM | gbM  | UM   |
| AT2G20980 | UM   | UM   | UM   | UM   | UM   | UM  | UM   | UM   |
| AT2G20990 | UM   | UM   | UM   | UM   | UM   | UM  | UM   | UM   |
| AT2G21010 | UM   | UM   | UM   | UM   | mCHH | UM  | UM   | UM   |
| AT2G21030 | UM   | UM   | UM   | UM   | UM   | UM  | UM   | UM   |
| AT2G21040 | UM   | UM   | UM   | UM   | UM   | UM  | UM   | UM   |
| AT2G21045 | UM   | UM   | UM   | UM   | UM   | UM  | UM   | UM   |
| AT2G21050 | UM   | UM   | UM   | UM   | UM   | UM  | UM   | UM   |
| AT2G21060 | UM   | UM   | UM   | UM   | UM   | UM  | UM   | UM   |
| AT2G21070 | UM   | UM   | UM   | UM   | UM   | UM  | UM   | UM   |
| AT2G21080 | UM   | UM   | UM   | UM   | UM   | UM  | UM   | UM   |
| AT2G21090 | UM   | gbM  | UM   | UM   | UM   | UM  | gbM  | UM   |
| AT2G21100 | UM   | UM   | UM   | UM   | UM   | UM  | UM   | UM   |
| AT2G21110 | UM   | UM   | UM   | UM   | UM   | UM  | UM   | UM   |
| AT2G21120 | UM   | UM   | UM   | UM   | UM   | UM  | UM   | UM   |
| AT2G21130 | UM   | UM   | UM   | UM   | UM   | UM  | UM   | UM   |
| AT2G21140 | UM   | UM   | UM   | UM   | UM   | UM  | UM   | UM   |
| AT2G21150 | UM   | UM   | UM   | UM   | UM   | UM  | UM   | UM   |
| AT2G21160 | UM   | UM   | UM   | UM   | UM   | UM  | UM   | UM   |
| AT2G21170 | gbM  | gbM  | UM   | UM   | UM   | UM  | gbM  | UM   |
| AT2G21180 | UM   | UM   | UM   | UM   | UM   | UM  | UM   | UM   |
| AT2G21185 | UM   | UM   | UM   | UM   | UM   | UM  | UM   | UM   |
| AT2G21190 | UM   | UM   | UM   | UM   | UM   | UM  | UM   | UM   |
| AT2G21195 | UM   | UM   | UM   | UM   | UM   | UM  | UM   | UM   |
| AT2G21200 | UM   | UM   | UM   | UM   | UM   | UM  | UM   | UM   |
| AT2G21210 | UM   | UM   | UM   | UM   | UM   | UM  | UM   | UM   |

|           |      |      |      |     |     |     |      |     |
|-----------|------|------|------|-----|-----|-----|------|-----|
| AT2G21220 | UM   | UM   | UM   | UM  | UM  | UM  | UM   | UM  |
| AT2G21230 | UM   | UM   | UM   | UM  | UM  | UM  | UM   | UM  |
| AT2G21235 | UM   | UM   | UM   | UM  | UM  | UM  | UM   | UM  |
| AT2G21237 | UM   | UM   | UM   | UM  | UM  | UM  | UM   | UM  |
| AT2G21240 | gbM  | gbM  | gbM  | gbM | gbM | gbM | gbM  | gbM |
| AT2G21250 | UM   | UM   | UM   | UM  | UM  | UM  | UM   | UM  |
| AT2G21260 | UM   | UM   | UM   | UM  | UM  | UM  | UM   | UM  |
| AT2G21270 | gbM  | gbM  | gbM  | gbM | gbM | gbM | gbM  | gbM |
| AT2G21280 | UM   | UM   | UM   | UM  | UM  | UM  | UM   | UM  |
| AT2G21290 | UM   | UM   | UM   | UM  | UM  | UM  | UM   | UM  |
| AT2G21300 | gbM  | gbM  | gbM  | gbM | gbM | gbM | gbM  | gbM |
| AT2G21320 | UM   | UM   | UM   | UM  | UM  | UM  | UM   | UM  |
| AT2G21330 | UM   | UM   | UM   | UM  | UM  | UM  | UM   | UM  |
| AT2G21340 | UM   | UM   | UM   | UM  | UM  | UM  | UM   | UM  |
| AT2G21350 | UM   | UM   | UM   | UM  | UM  | UM  | UM   | UM  |
| AT2G21370 | UM   | gbM  | UM   | UM  | gbM | UM  | gbM  | UM  |
| AT2G21380 | gbM  | mCHH | UM   | UM  | UM  | UM  | mCHH | gbM |
| AT2G21385 | UM   | UM   | UM   | UM  | UM  | UM  | UM   | UM  |
| AT2G21390 | gbM  | gbM  | gbM  | gbM | gbM | gbM | gbM  | gbM |
| AT2G21400 | UM   | UM   | UM   | UM  | UM  | UM  | UM   | UM  |
| AT2G21410 | UM   | UM   | UM   | UM  | UM  | gbM | mCHH | UM  |
| AT2G21420 | UM   | UM   | UM   | UM  | UM  | UM  | UM   | UM  |
| AT2G21430 | UM   | UM   | UM   | UM  | UM  | UM  | UM   | UM  |
| AT2G21440 | UM   | mCHH | UM   | UM  | UM  | UM  | mCHH | UM  |
| AT2G21450 | UM   | UM   | UM   | UM  | UM  | UM  | UM   | UM  |
| AT2G21465 | UM   | UM   | UM   | UM  | UM  | UM  | UM   | UM  |
| AT2G21470 | gbM  | gbM  | gbM  | gbM | gbM | gbM | mCHH | gbM |
| AT2G21480 | UM   | UM   | UM   | UM  | UM  | UM  | UM   | UM  |
| AT2G21490 | UM   | UM   | UM   | UM  | UM  | UM  | UM   | UM  |
| AT2G21500 | UM   | UM   | UM   | UM  | UM  | UM  | UM   | UM  |
| AT2G21510 | UM   | UM   | UM   | UM  | UM  | UM  | UM   | UM  |
| AT2G21520 | gbM  | gbM  | UM   | UM  | gbM | UM  | gbM  | gbM |
| AT2G21530 | UM   | UM   | UM   | UM  | UM  | UM  | UM   | UM  |
| AT2G21540 | UM   | UM   | UM   | UM  | UM  | UM  | UM   | UM  |
| AT2G21550 | UM   | UM   | UM   | UM  | UM  | UM  | UM   | UM  |
| AT2G21560 | UM   | UM   | UM   | UM  | UM  | UM  | UM   | UM  |
| AT2G21580 | UM   | UM   | UM   | UM  | UM  | UM  | UM   | UM  |
| AT2G21590 | UM   | UM   | UM   | UM  | UM  | UM  | UM   | UM  |
| AT2G21600 | gbM  | gbM  | gbM  | gbM | gbM | gbM | gbM  | UM  |
| AT2G21610 | UM   | UM   | UM   | UM  | UM  | UM  | UM   | UM  |
| AT2G21620 | UM   | UM   | UM   | UM  | UM  | UM  | UM   | UM  |
| AT2G21630 | UM   | UM   | UM   | UM  | UM  | UM  | UM   | UM  |
| AT2G21640 | UM   | UM   | UM   | UM  | UM  | UM  | UM   | UM  |
| AT2G21650 | UM   | UM   | UM   | UM  | UM  | UM  | UM   | UM  |
| AT2G21655 | mCHH | UM   | mCHH | UM  | UM  | gbM | mCHH | UM  |
| AT2G21660 | UM   | UM   | UM   | UM  | UM  | UM  | UM   | UM  |
| AT2G21680 | UM   | UM   | UM   | UM  | UM  | UM  | UM   | UM  |
| AT2G21690 | UM   | UM   | UM   | UM  | UM  | UM  | UM   | UM  |

|           |      |      |      |     |     |     |      |     |
|-----------|------|------|------|-----|-----|-----|------|-----|
| AT2G21710 | UM   | UM   | UM   | UM  | UM  | UM  | UM   | UM  |
| AT2G21720 | UM   | mCHH | UM   | UM  | UM  | UM  | mCHH | UM  |
| AT2G21725 | UM   | UM   | UM   | UM  | UM  | UM  | UM   | UM  |
| AT2G21727 | mCHH | mCHH | UM   | UM  | gbM | UM  | mCHH | UM  |
| AT2G21730 | UM   | UM   | UM   | UM  | UM  | UM  | UM   | UM  |
| AT2G21740 | UM   | UM   | UM   | UM  | UM  | UM  | UM   | UM  |
| AT2G21750 | UM   | UM   | UM   | UM  | UM  | UM  | UM   | UM  |
| AT2G21770 | gbM  | gbM  | gbM  | UM  | UM  | UM  | mCHH | UM  |
| AT2G21780 | UM   | UM   | UM   | UM  | UM  | UM  | UM   | UM  |
| AT2G21790 | UM   | UM   | UM   | UM  | UM  | UM  | UM   | UM  |
| AT2G21800 | UM   | UM   | UM   | UM  | UM  | UM  | UM   | UM  |
| AT2G21810 | UM   | UM   | UM   | UM  | UM  | UM  | UM   | UM  |
| AT2G21820 | UM   | UM   | UM   | UM  | UM  | UM  | UM   | UM  |
| AT2G21830 | UM   | UM   | UM   | UM  | UM  | UM  | UM   | UM  |
| AT2G21840 | UM   | UM   | UM   | UM  | UM  | UM  | UM   | UM  |
| AT2G21850 | UM   | UM   | UM   | UM  | UM  | UM  | UM   | UM  |
| AT2G21860 | UM   | gbM  | UM   | UM  | UM  | UM  | UM   | UM  |
| AT2G21870 | UM   | UM   | UM   | UM  | UM  | UM  | UM   | UM  |
| AT2G21880 | UM   | UM   | UM   | UM  | UM  | UM  | UM   | UM  |
| AT2G21890 | UM   | UM   | UM   | UM  | UM  | UM  | UM   | UM  |
| AT2G21900 | UM   | UM   | UM   | UM  | UM  | UM  | UM   | UM  |
| AT2G21910 | UM   | UM   | UM   | UM  | UM  | UM  | UM   | UM  |
| AT2G21920 | UM   | mCHH | UM   | UM  | UM  | UM  | mCHH | UM  |
| AT2G21930 | UM   | UM   | UM   | UM  | UM  | UM  | UM   | UM  |
| AT2G21940 | UM   | gbM  | UM   | UM  | UM  | UM  | UM   | UM  |
| AT2G21950 | UM   | UM   | UM   | UM  | UM  | UM  | UM   | UM  |
| AT2G21960 | UM   | UM   | UM   | UM  | UM  | UM  | UM   | UM  |
| AT2G21970 | UM   | UM   | UM   | UM  | UM  | UM  | UM   | UM  |
| AT2G21980 | UM   | UM   | UM   | UM  | UM  | UM  | UM   | UM  |
| AT2G21990 | UM   | UM   | UM   | UM  | UM  | UM  | UM   | UM  |
| AT2G22000 | UM   | UM   | UM   | UM  | UM  | UM  | UM   | UM  |
| AT2G22010 | gbM  | mCHH | gbM  | gbM | gbM | gbM | mCHH | gbM |
| AT2G22030 | UM   | UM   | UM   | UM  | UM  | UM  | UM   | UM  |
| AT2G22040 | UM   | UM   | UM   | UM  | UM  | UM  | mCHH | UM  |
| AT2G22050 | UM   | UM   | UM   | UM  | UM  | UM  | UM   | UM  |
| AT2G22055 | UM   | UM   | UM   | UM  | UM  | UM  | UM   | UM  |
| AT2G22060 | UM   | UM   | UM   | UM  | UM  | UM  | UM   | UM  |
| AT2G22070 | gbM  | mCHH | gbM  | gbM | gbM | gbM | gbM  | gbM |
| AT2G22080 | UM   | mCHG | mCHG | UM  | UM  | UM  | mCHG | UM  |
| AT2G22088 | UM   | UM   | UM   | UM  | UM  | UM  | UM   | UM  |
| AT2G22090 | UM   | UM   | UM   | UM  | UM  | UM  | UM   | UM  |
| AT2G22100 | UM   | UM   | UM   | UM  | UM  | UM  | mCHH | UM  |
| AT2G22120 | gbM  | gbM  | gbM  | UM  | UM  | UM  | mCHH | UM  |
| AT2G22121 | UM   | UM   | UM   | UM  | UM  | UM  | UM   | UM  |
| AT2G22122 | UM   | UM   | UM   | UM  | UM  | UM  | UM   | UM  |
| AT2G22125 | gbM  | gbM  | gbM  | gbM | gbM | gbM | gbM  | gbM |
| AT2G22140 | UM   | UM   | UM   | UM  | UM  | UM  | UM   | UM  |
| AT2G22145 | UM   | UM   | UM   | UM  | UM  | UM  | UM   | UM  |

|           |      |      |      |      |      |      |      |      |
|-----------|------|------|------|------|------|------|------|------|
| AT2G22155 | UM   |
| AT2G22160 | mCHH |
| AT2G22170 | UM   |
| AT2G22180 | UM   |
| AT2G22190 | UM   |
| AT2G22200 | UM   |
| AT2G22201 | UM   |
| AT2G22230 | UM   |
| AT2G22240 | UM   |
| AT2G22241 | UM   |
| AT2G22250 | UM   |
| AT2G22260 | UM   |
| AT2G22270 | UM   |
| AT2G22290 | UM   |
| AT2G22300 | gbM  | gbM  | gbM  | gbM  | gbM  | gbM  | mCHH | gbM  |
| AT2G22310 | UM   |
| AT2G22320 | UM   |
| AT2G22330 | UM   |
| AT2G22340 | mCHH | mCHH | UM   | UM   | UM   | UM   | mCHH | UM   |
| AT2G22345 | UM   |
| AT2G22360 | gbM  |
| AT2G22370 | UM   |
| AT2G22400 | gbM  | gbM  | gbM  | gbM  | gbM  | gbM  | mCHH | gbM  |
| AT2G22410 | UM   | UM   | UM   | UM   | UM   | UM   | gbM  | UM   |
| AT2G22420 | UM   |
| AT2G22425 | UM   |
| AT2G22426 | UM   |
| AT2G22430 | UM   |
| AT2G22440 | mCHH |
| AT2G22450 | UM   |
| AT2G22460 | UM   |
| AT2G22470 | UM   |
| AT2G22475 | UM   |
| AT2G22480 | UM   |
| AT2G22490 | UM   |
| AT2G22500 | UM   |
| AT2G22510 | UM   |
| AT2G22520 | UM   |
| AT2G22530 | UM   |
| AT2G22540 | UM   |
| AT2G22560 | gbM  | gbM  | gbM  | UM   | gbM  | gbM  | mCHH | gbM  |
| AT2G22570 | UM   |
| AT2G22590 | UM   |
| AT2G22600 | UM   |
| AT2G22610 | UM   | mCHH | UM   | UM   | UM   | UM   | mCHH | UM   |
| AT2G22620 | UM   | UM   | UM   | UM   | UM   | UM   | mCHH | UM   |
| AT2G22630 | UM   |
| AT2G22640 | UM   |



|           |      |      |      |      |      |      |      |      |
|-----------|------|------|------|------|------|------|------|------|
| AT2G22650 | UM   |
| AT2G22660 | UM   |
| AT2G22670 | UM   |
| AT2G22680 | UM   |
| AT2G22690 | UM   |
| AT2G22720 | gbM  | gbM  | gbM  | gbM  | gbM  | gbM  | mCHH | gbM  |
| AT2G22730 | UM   |
| AT2G22740 | gbM  | gbM  | gbM  | gbM  | gbM  | UM   | gbM  | gbM  |
| AT2G22750 | UM   |
| AT2G22760 | UM   |
| AT2G22770 | UM   |
| AT2G22780 | gbM  |
| AT2G22790 | UM   |
| AT2G22795 | mCHH | mCHH | mCHH | UM   | UM   | UM   | mCHH | UM   |
| AT2G22800 | UM   |
| AT2G22802 | UM   |
| AT2G22805 | UM   | UM   | UM   | UM   | mCHG | UM   | UM   | UM   |
| AT2G22807 | UM   |
| AT2G22810 | UM   |
| AT2G22820 | UM   |
| AT2G22830 | UM   |
| AT2G22840 | gbM  | gbM  | gbM  | gbM  | gbM  | UM   | gbM  | gbM  |
| AT2G22850 | UM   |
| AT2G22860 | UM   |
| AT2G22870 | UM   |
| AT2G22880 | UM   | UM   | UM   | gbM  | UM   | UM   | UM   | UM   |
| AT2G22890 | UM   | UM   | UM   | UM   | UM   | mCHG | UM   | UM   |
| AT2G22900 | UM   |
| AT2G22905 | UM   |
| AT2G22910 | UM   | gbM  | gbM  | UM   | UM   | UM   | gbM  | UM   |
| AT2G22920 | UM   | UM   | UM   | UM   | UM   | UM   | mCHH | UM   |
| AT2G22930 | UM   | mCHG | UM   | UM   | UM   | UM   | UM   | UM   |
| AT2G22940 | mCHH | mCHH | mCHH | mCHG | mCHG | mCHG | mCHH | mCHG |
| AT2G22941 | mCHG | UM   |
| AT2G22942 | UM   |
| AT2G22950 | UM   |
| AT2G22960 | UM   |
| AT2G22970 | UM   | UM   | UM   | UM   | UM   | UM   | mCHH | UM   |
| AT2G22980 | UM   |
| AT2G22990 | UM   |
| AT2G23000 | UM   |
| AT2G23010 | UM   |
| AT2G23030 | UM   |
| AT2G23040 | UM   |
| AT2G23050 | UM   |
| AT2G23060 | UM   |
| AT2G23067 | UM   |
| AT2G23070 | UM   |



|           |     |      |     |     |     |     |      |     |
|-----------|-----|------|-----|-----|-----|-----|------|-----|
| AT2G23520 | gbM | gbM  | gbM | gbM | gbM | gbM | gbM  | gbM |
| AT2G23530 | UM  | UM   | UM  | UM  | UM  | UM  | mCHH | UM  |
| AT2G23540 | UM  | mCHG | UM  | UM  | UM  | UM  | mCHG | UM  |
| AT2G23550 | UM  | UM   | UM  | UM  | UM  | UM  | UM   | UM  |
| AT2G23560 | UM  | UM   | UM  | UM  | UM  | UM  | UM   | UM  |
| AT2G23570 | UM  | UM   | UM  | UM  | UM  | UM  | UM   | UM  |
| AT2G23580 | UM  | UM   | UM  | UM  | UM  | UM  | UM   | UM  |
| AT2G23590 | UM  | UM   | UM  | UM  | UM  | UM  | UM   | UM  |
| AT2G23600 | UM  | UM   | UM  | UM  | UM  | UM  | UM   | UM  |
| AT2G23610 | UM  | UM   | UM  | UM  | UM  | UM  | UM   | UM  |
| AT2G23620 | UM  | UM   | UM  | UM  | UM  | UM  | UM   | UM  |
| AT2G23630 | UM  | UM   | UM  | UM  | UM  | UM  | UM   | UM  |
| AT2G23640 | UM  | UM   | UM  | UM  | UM  | UM  | UM   | UM  |
| AT2G23660 | UM  | UM   | UM  | UM  | UM  | UM  | UM   | UM  |
| AT2G23670 | UM  | UM   | UM  | UM  | UM  | UM  | UM   | UM  |
| AT2G23680 | UM  | UM   | UM  | UM  | UM  | UM  | UM   | UM  |
| AT2G23690 | UM  | UM   | UM  | UM  | UM  | UM  | UM   | UM  |
| AT2G23700 | gbM | gbM  | gbM | gbM | gbM | gbM | mCHH | gbM |
| AT2G23740 | gbM | gbM  | gbM | gbM | gbM | gbM | mCHH | gbM |
| AT2G23755 | UM  | UM   | UM  | UM  | UM  | UM  | UM   | UM  |
| AT2G23760 | UM  | UM   | UM  | UM  | UM  | UM  | UM   | UM  |
| AT2G23770 | UM  | UM   | UM  | UM  | UM  | UM  | UM   | UM  |
| AT2G23780 | UM  | UM   | UM  | UM  | UM  | UM  | UM   | UM  |
| AT2G23790 | UM  | UM   | UM  | UM  | UM  | UM  | UM   | UM  |
| AT2G23800 | UM  | UM   | UM  | UM  | UM  | UM  | UM   | UM  |
| AT2G23810 | UM  | UM   | UM  | UM  | UM  | UM  | UM   | UM  |
| AT2G23820 | UM  | UM   | UM  | UM  | UM  | UM  | UM   | UM  |
| AT2G23830 | UM  | UM   | UM  | UM  | UM  | UM  | UM   | UM  |
| AT2G23834 | UM  | UM   | UM  | UM  | UM  | UM  | UM   | UM  |
| AT2G23840 | UM  | UM   | UM  | UM  | UM  | UM  | UM   | UM  |
| AT2G23890 | UM  | gbM  | UM  | UM  | UM  | UM  | mCHH | UM  |
| AT2G23900 | UM  | UM   | UM  | UM  | UM  | UM  | UM   | UM  |
| AT2G23910 | UM  | UM   | UM  | UM  | UM  | UM  | UM   | UM  |
| AT2G23920 | UM  | UM   | UM  | UM  | UM  | UM  | UM   | UM  |
| AT2G23930 | UM  | UM   | UM  | UM  | UM  | UM  | UM   | UM  |
| AT2G23940 | UM  | UM   | UM  | UM  | UM  | UM  | UM   | UM  |
| AT2G23945 | gbM | mCHH | gbM | gbM | gbM | gbM | gbM  | gbM |
| AT2G23950 | gbM | UM   | UM  | UM  | UM  | UM  | gbM  | UM  |
| AT2G23960 | UM  | UM   | UM  | UM  | UM  | UM  | UM   | UM  |
| AT2G23970 | UM  | UM   | UM  | UM  | UM  | UM  | UM   | UM  |
| AT2G23980 | gbM | gbM  | gbM | gbM | gbM | gbM | mCHH | gbM |
| AT2G23985 | UM  | UM   | UM  | UM  | UM  | UM  | UM   | UM  |
| AT2G23990 | UM  | UM   | UM  | UM  | UM  | UM  | UM   | UM  |
| AT2G24000 | UM  | UM   | UM  | UM  | UM  | UM  | UM   | UM  |
| AT2G24010 | UM  | UM   | UM  | UM  | UM  | UM  | UM   | UM  |
| AT2G24020 | UM  | UM   | UM  | UM  | UM  | UM  | UM   | UM  |
| AT2G24030 | UM  | UM   | UM  | UM  | UM  | UM  | UM   | UM  |
| AT2G24040 | UM  | UM   | UM  | UM  | UM  | UM  | UM   | UM  |





|           |      |      |      |      |      |      |      |      |
|-----------|------|------|------|------|------|------|------|------|
| AT2G24950 | UM   |
| AT2G24960 | gbM  | mCHH | gbM  | gbM  | gbM  | UM   | gbM  | gbM  |
| AT2G24970 | UM   |
| AT2G24980 | mCHH | mCHH | mCHH | mCHG | mCHG | mCHH | mCHH | mCHG |
| AT2G24990 | gbM  | gbM  | UM   | UM   | UM   | UM   | gbM  | UM   |
| AT2G25000 | UM   |
| AT2G25010 | gbM  |
| AT2G25050 | mCHH | mCHH | mCHH | mCHG | mCHG | mCHG | mCHH | gbM  |
| AT2G25052 | UM   |
| AT2G25060 | UM   |
| AT2G25070 | gbM  |
| AT2G25080 | UM   |
| AT2G25090 | UM   |
| AT2G25100 | UM   |
| AT2G25110 | UM   |
| AT2G25120 | UM   |
| AT2G25130 | UM   |
| AT2G25140 | mCHH | mCHH | gbM  | UM   | UM   | UM   | mCHH | UM   |
| AT2G25150 | UM   |
| AT2G25160 | mCHH | mCHH | mCHH | mCHG | mCHH | mCHH | mCHH | mCHG |
| AT2G25169 | UM   |
| AT2G25170 | gbM  | mCHH | gbM  | gbM  | gbM  | gbM  | mCHH | gbM  |
| AT2G25180 | gbM  | gbM  | UM   | gbM  | gbM  | gbM  | gbM  | gbM  |
| AT2G25185 | UM   |
| AT2G25190 | UM   |
| AT2G25200 | UM   |
| AT2G25210 | UM   |
| AT2G25220 | UM   | UM   | UM   | UM   | UM   | UM   | mCHH | UM   |
| AT2G25230 | UM   |
| AT2G25240 | UM   |
| AT2G25250 | UM   |
| AT2G25260 | UM   |
| AT2G25270 | mCHG | mCHH | mCHG | gbM  | gbM  | gbM  | mCHH | gbM  |
| AT2G25280 | UM   |
| AT2G25290 | UM   | gbM  | UM   | UM   | gbM  | UM   | gbM  | UM   |
| AT2G25295 | UM   |
| AT2G25300 | UM   |
| AT2G25305 | UM   |
| AT2G25310 | UM   |
| AT2G25312 | mCHH | UM   |
| AT2G25320 | UM   | UM   | UM   | UM   | UM   | UM   | gbM  | UM   |
| AT2G25330 | UM   |
| AT2G25340 | UM   |
| AT2G25344 | UM   |
| AT2G25350 | gbM  | gbM  | UM   | UM   | UM   | UM   | gbM  | UM   |
| AT2G25355 | UM   |
| AT2G25360 | UM   |
| AT2G25370 | mCHH | mCHH | mCHH | mCHG | mCHG | mCHG | mCHH | mCHG |







|           |      |      |      |      |      |      |      |      |
|-----------|------|------|------|------|------|------|------|------|
| AT2G26310 | gbM  |
| AT2G26320 | UM   |
| AT2G26330 | gbM  |
| AT2G26340 | UM   | UM   | UM   | UM   | UM   | UM   | mCHH | UM   |
| AT2G26350 | UM   |
| AT2G26360 | UM   |
| AT2G26370 | UM   |
| AT2G26380 | UM   |
| AT2G26390 | UM   |
| AT2G26400 | UM   |
| AT2G26410 | UM   |
| AT2G26420 | UM   |
| AT2G26430 | UM   |
| AT2G26440 | UM   |
| AT2G26450 | UM   |
| AT2G26460 | gbM  | gbM  | gbM  | UM   | gbM  | UM   | gbM  | UM   |
| AT2G26470 | UM   | UM   | UM   | UM   | UM   | UM   | mCHH | UM   |
| AT2G26480 | UM   | UM   | UM   | UM   | UM   | UM   | mCHH | UM   |
| AT2G26490 | UM   |
| AT2G26500 | UM   |
| AT2G26510 | gbM  |
| AT2G26511 | UM   |
| AT2G26520 | UM   |
| AT2G26530 | UM   |
| AT2G26540 | UM   | UM   | UM   | UM   | UM   | UM   | mCHH | UM   |
| AT2G26550 | UM   |
| AT2G26560 | UM   |
| AT2G26570 | UM   | UM   | UM   | UM   | UM   | UM   | mCHH | UM   |
| AT2G26580 | UM   |
| AT2G26590 | UM   |
| AT2G26600 | UM   |
| AT2G26610 | UM   | UM   | UM   | UM   | UM   | UM   | mCHH | UM   |
| AT2G26620 | mCHH |
| AT2G26640 | UM   |
| AT2G26650 | gbM  | gbM  | gbM  | gbM  | gbM  | UM   | gbM  | gbM  |
| AT2G26660 | UM   |
| AT2G26670 | UM   |
| AT2G26680 | UM   | UM   | UM   | UM   | UM   | UM   | mCHH | UM   |
| AT2G26690 | UM   |
| AT2G26695 | UM   |
| AT2G26700 | UM   |
| AT2G26710 | UM   |
| AT2G26720 | UM   |
| AT2G26730 | UM   |
| AT2G26740 | UM   |
| AT2G26750 | UM   |
| AT2G26760 | UM   |
| AT2G26770 | UM   | mCHH | UM   | UM   | UM   | gbM  | gbM  | gbM  |





|           |     |      |     |     |     |     |      |     |
|-----------|-----|------|-----|-----|-----|-----|------|-----|
| AT2G27660 | UM  | UM   | UM  | UM  | UM  | UM  | UM   | UM  |
| AT2G27670 | UM  | UM   | UM  | UM  | UM  | UM  | mCHH | UM  |
| AT2G27680 | UM  | UM   | UM  | UM  | UM  | UM  | UM   | UM  |
| AT2G27690 | UM  | UM   | UM  | UM  | UM  | UM  | UM   | UM  |
| AT2G27700 | UM  | UM   | UM  | UM  | UM  | UM  | UM   | UM  |
| AT2G27710 | UM  | UM   | UM  | UM  | UM  | UM  | UM   | UM  |
| AT2G27720 | UM  | UM   | UM  | UM  | UM  | UM  | UM   | UM  |
| AT2G27730 | UM  | UM   | UM  | UM  | UM  | UM  | UM   | UM  |
| AT2G27740 | UM  | UM   | UM  | UM  | UM  | UM  | UM   | UM  |
| AT2G27750 | UM  | UM   | UM  | UM  | UM  | UM  | UM   | UM  |
| AT2G27760 | UM  | UM   | UM  | UM  | UM  | UM  | UM   | UM  |
| AT2G27770 | UM  | UM   | UM  | UM  | UM  | UM  | UM   | UM  |
| AT2G27775 | UM  | UM   | UM  | UM  | UM  | UM  | UM   | UM  |
| AT2G27780 | UM  | UM   | UM  | UM  | UM  | UM  | UM   | UM  |
| AT2G27790 | UM  | UM   | UM  | UM  | UM  | UM  | UM   | UM  |
| AT2G27800 | gbM | gbM  | gbM | gbM | gbM | UM  | mCHG | UM  |
| AT2G27810 | UM  | UM   | UM  | UM  | UM  | UM  | UM   | UM  |
| AT2G27820 | UM  | UM   | UM  | UM  | UM  | UM  | UM   | UM  |
| AT2G27830 | UM  | UM   | UM  | UM  | UM  | UM  | UM   | UM  |
| AT2G27840 | UM  | UM   | UM  | UM  | UM  | UM  | UM   | UM  |
| AT2G27860 | UM  | UM   | UM  | UM  | UM  | UM  | UM   | UM  |
| AT2G27880 | UM  | UM   | UM  | UM  | UM  | UM  | mCHH | UM  |
| AT2G27900 | UM  | UM   | gbM | UM  | UM  | UM  | mCHH | gbM |
| AT2G27920 | UM  | mCHH | UM  | UM  | UM  | UM  | mCHH | UM  |
| AT2G27930 | UM  | UM   | UM  | UM  | UM  | UM  | UM   | UM  |
| AT2G27940 | UM  | UM   | UM  | UM  | UM  | UM  | UM   | UM  |
| AT2G27950 | gbM | gbM  | gbM | gbM | gbM | gbM | gbM  | gbM |
| AT2G27960 | UM  | gbM  | gbM | UM  | UM  | UM  | UM   | UM  |
| AT2G27970 | UM  | UM   | UM  | UM  | UM  | UM  | UM   | UM  |
| AT2G27980 | gbM | gbM  | gbM | gbM | gbM | gbM | mCHH | gbM |
| AT2G27990 | UM  | UM   | UM  | UM  | UM  | UM  | UM   | UM  |
| AT2G28000 | UM  | UM   | UM  | UM  | UM  | UM  | UM   | UM  |
| AT2G28010 | UM  | UM   | UM  | UM  | UM  | UM  | UM   | UM  |
| AT2G28020 | UM  | UM   | UM  | UM  | UM  | UM  | UM   | UM  |
| AT2G28030 | UM  | UM   | UM  | UM  | UM  | UM  | UM   | UM  |
| AT2G28040 | UM  | UM   | UM  | UM  | UM  | UM  | UM   | UM  |
| AT2G28050 | UM  | UM   | UM  | UM  | UM  | UM  | UM   | UM  |
| AT2G28060 | UM  | UM   | UM  | UM  | UM  | UM  | UM   | UM  |
| AT2G28070 | gbM | gbM  | gbM | gbM | gbM | gbM | mCHH | gbM |
| AT2G28080 | UM  | UM   | UM  | UM  | UM  | UM  | UM   | UM  |
| AT2G28085 | UM  | UM   | UM  | UM  | UM  | UM  | UM   | UM  |
| AT2G28090 | UM  | UM   | UM  | UM  | UM  | UM  | UM   | UM  |
| AT2G28100 | UM  | UM   | UM  | UM  | UM  | UM  | UM   | UM  |
| AT2G28105 | UM  | UM   | UM  | UM  | UM  | UM  | UM   | UM  |
| AT2G28110 | UM  | UM   | UM  | UM  | UM  | UM  | UM   | UM  |
| AT2G28120 | UM  | UM   | UM  | UM  | UM  | UM  | UM   | UM  |
| AT2G28130 | UM  | UM   | UM  | UM  | UM  | UM  | UM   | UM  |
| AT2G28140 | UM  | UM   | UM  | UM  | UM  | UM  | UM   | UM  |

|           |      |      |      |      |      |      |      |      |
|-----------|------|------|------|------|------|------|------|------|
| AT2G28150 | gbM  | gbM  | gbM  | gbM  | gbM  | gbM  | mCHH | gbM  |
| AT2G28160 | UM   |
| AT2G28170 | UM   | mCHG | UM   | UM   | UM   | UM   | mCHH | UM   |
| AT2G28180 | UM   | UM   | UM   | UM   | UM   | UM   | mCHH | UM   |
| AT2G28190 | UM   |
| AT2G28200 | UM   |
| AT2G28210 | UM   |
| AT2G28220 | UM   |
| AT2G28230 | UM   |
| AT2G28240 | gbM  | gbM  | gbM  | UM   | gbM  | UM   | gbM  | gbM  |
| AT2G28250 | gbM  |
| AT2G28260 | gbM  | mCHH | gbM  | gbM  | gbM  | gbM  | gbM  | gbM  |
| AT2G28270 | UM   |
| AT2G28290 | gbM  | mCHH | gbM  | gbM  | gbM  | gbM  | mCHH | gbM  |
| AT2G28305 | UM   |
| AT2G28310 | gbM  | gbM  | gbM  | gbM  | gbM  | gbM  | mCHH | gbM  |
| AT2G28315 | UM   |
| AT2G28320 | gbM  |
| AT2G28330 | UM   |
| AT2G28340 | UM   |
| AT2G28350 | UM   |
| AT2G28355 | UM   |
| AT2G28360 | gbM  | mCHH | gbM  | gbM  | gbM  | gbM  | mCHH | gbM  |
| AT2G28370 | UM   |
| AT2G28380 | gbM  |
| AT2G28390 | UM   |
| AT2G28400 | UM   |
| AT2G28401 | mCHG | mCHH | mCHG | mCHG | mCHG | mCHG | mCHH | mCHG |
| AT2G28405 | UM   |
| AT2G28410 | UM   |
| AT2G28420 | UM   |
| AT2G28426 | UM   |
| AT2G28430 | UM   |
| AT2G28440 | UM   | UM   | UM   | gbM  | UM   | UM   | UM   | UM   |
| AT2G28450 | gbM  | mCHH | gbM  | gbM  | gbM  | gbM  | gbM  | gbM  |
| AT2G28460 | UM   |
| AT2G28470 | gbM  | gbM  | gbM  | gbM  | gbM  | gbM  | mCHH | gbM  |
| AT2G28480 | UM   | UM   | UM   | UM   | UM   | UM   | mCHH | UM   |
| AT2G28490 | UM   | UM   | UM   | UM   | UM   | UM   | mCHH | UM   |
| AT2G28500 | UM   |
| AT2G28507 | UM   |
| AT2G28510 | UM   | UM   | UM   | UM   | UM   | UM   | mCHH | UM   |
| AT2G28520 | gbM  | mCHH | gbM  | gbM  | gbM  | gbM  | mCHH | gbM  |
| AT2G28540 | gbM  | mCHH | gbM  | gbM  | gbM  | gbM  | gbM  | gbM  |
| AT2G28550 | UM   |
| AT2G28560 | UM   | gbM  | UM   | UM   | UM   | UM   | UM   | UM   |
| AT2G28570 | UM   |
| AT2G28580 | UM   |

|           |      |      |      |      |      |      |      |      |
|-----------|------|------|------|------|------|------|------|------|
| AT2G28590 | UM   |
| AT2G28600 | UM   | UM   | UM   | UM   | UM   | UM   | mCHH | UM   |
| AT2G28605 | UM   |
| AT2G28610 | UM   |
| AT2G28620 | UM   | mCHH | UM   | UM   | UM   | UM   | UM   | UM   |
| AT2G28625 | UM   |
| AT2G28630 | UM   |
| AT2G28640 | mCHH |
| AT2G28650 | UM   |
| AT2G28660 | UM   |
| AT2G28670 | UM   |
| AT2G28671 | UM   |
| AT2G28680 | UM   |
| AT2G28690 | UM   |
| AT2G28700 | UM   |
| AT2G28710 | UM   |
| AT2G28720 | UM   |
| AT2G28725 | UM   |
| AT2G28740 | UM   |
| AT2G28755 | UM   |
| AT2G28760 | UM   | UM   | UM   | UM   | UM   | UM   | mCHH | UM   |
| AT2G28780 | UM   |
| AT2G28790 | UM   |
| AT2G28800 | UM   |
| AT2G28810 | UM   |
| AT2G28830 | mCHH | UM   | UM   | UM   | UM   | UM   | mCHH | UM   |
| AT2G28840 | UM   |
| AT2G28850 | UM   |
| AT2G28860 | UM   |
| AT2G28870 | UM   |
| AT2G28880 | gbM  |
| AT2G28890 | UM   |
| AT2G28900 | UM   |
| AT2G28910 | gbM  | mCHG | gbM  | gbM  | UM   | UM   | mCHG | UM   |
| AT2G28920 | UM   |
| AT2G28930 | UM   | gbM  |
| AT2G28940 | gbM  |
| AT2G28950 | UM   |
| AT2G28960 | UM   |
| AT2G28970 | UM   |
| AT2G28990 | UM   | UM   | UM   | UM   | UM   | UM   | mCHH | UM   |
| AT2G29000 | UM   |
| AT2G29020 | UM   |
| AT2G29040 | mCHH | mCHH | mCHG | UM   | mCHG | UM   | mCHH | mCHG |
| AT2G29045 | UM   |
| AT2G29050 | UM   |
| AT2G29060 | UM   |
| AT2G29065 | gbM  | mCHH | gbM  | gbM  | gbM  | gbM  | mCHH | gbM  |

|           |     |     |     |     |     |     |      |     |
|-----------|-----|-----|-----|-----|-----|-----|------|-----|
| AT2G29070 | UM   | UM  |
| AT2G29080 | gbM  | gbM |
| AT2G29090 | UM   | UM  |
| AT2G29100 | UM   | UM  |
| AT2G29110 | UM   | UM  |
| AT2G29120 | UM   | UM  |
| AT2G29125 | UM   | UM  |
| AT2G29130 | UM   | UM  |
| AT2G29140 | gbM  | gbM |
| AT2G29150 | UM   | UM  |
| AT2G29170 | UM   | UM  |
| AT2G29180 | UM   | UM  |
| AT2G29190 | gbM  | gbM |
| AT2G29200 | gbM  | gbM |
| AT2G29210 | gbM | gbM | gbM | gbM | gbM | gbM | mCHH | gbM |
| AT2G29220 | UM   | UM  |
| AT2G29250 | UM   | UM  |
| AT2G29260 | UM   | UM  |
| AT2G29263 | UM   | UM  |
| AT2G29290 | UM   | UM  |
| AT2G29300 | UM   | UM  |
| AT2G29310 | UM   | UM  |
| AT2G29320 | UM   | UM  |
| AT2G29330 | UM   | UM  |
| AT2G29340 | UM   | UM  |
| AT2G29350 | UM   | UM  |
| AT2G29360 | UM   | UM  |
| AT2G29370 | UM   | UM  |
| AT2G29380 | UM   | UM  |
| AT2G29390 | UM   | UM  |
| AT2G29400 | UM   | UM  |
| AT2G29410 | UM   | UM  |
| AT2G29420 | UM   | UM  |
| AT2G29430 | UM   | UM  |
| AT2G29440 | UM   | UM  |
| AT2G29450 | UM   | UM  |
| AT2G29452 | UM   | UM  |
| AT2G29460 | UM   | UM  |
| AT2G29470 | UM   | UM  |
| AT2G29480 | UM   | UM  |
| AT2G29490 | UM   | UM  |
| AT2G29500 | UM   | UM  |
| AT2G29510 | gbM | gbM | UM  | gbM | UM  | UM  | gbM  | UM  |
| AT2G29525 | UM   | UM  |
| AT2G29530 | UM   | UM  |
| AT2G29540 | UM   | UM  |
| AT2G29550 | UM   | UM  |
| AT2G29560 | UM   | UM  |

|           |      |      |      |      |      |      |      |      |
|-----------|------|------|------|------|------|------|------|------|
| AT2G29570 | UM   |
| AT2G29580 | UM   |
| AT2G29590 | UM   |
| AT2G29600 | mCHH | mCHH | UM   | UM   | UM   | UM   | mCHH | UM   |
| AT2G29605 | mCHH |
| AT2G29620 | UM   | mCHH | UM   | UM   | UM   | UM   | UM   | UM   |
| AT2G29628 | UM   |
| AT2G29630 | gbM  |
| AT2G29640 | UM   |
| AT2G29650 | UM   |
| AT2G29654 | UM   |
| AT2G29660 | UM   |
| AT2G29670 | UM   |
| AT2G29679 | UM   |
| AT2G29680 | UM   |
| AT2G29690 | UM   |
| AT2G29700 | UM   |
| AT2G29710 | UM   |
| AT2G29720 | UM   |
| AT2G29730 | UM   |
| AT2G29740 | UM   |
| AT2G29750 | UM   |
| AT2G29760 | UM   |
| AT2G29770 | UM   |
| AT2G29780 | UM   |
| AT2G29790 | UM   |
| AT2G29800 | UM   |
| AT2G29810 | UM   |
| AT2G29820 | UM   |
| AT2G29830 | UM   |
| AT2G29840 | UM   |
| AT2G29850 | mCHH |
| AT2G29860 | UM   |
| AT2G29870 | UM   |
| AT2G29880 | mCHH |
| AT2G29890 | gbM  | mCHH | gbM  | gbM  | gbM  | gbM  | mCHH | UM   |
| AT2G29900 | UM   |
| AT2G29910 | UM   |
| AT2G29920 | mCHH |
| AT2G29930 | UM   |
| AT2G29940 | UM   |
| AT2G29950 | UM   |
| AT2G29960 | UM   |
| AT2G29970 | UM   |
| AT2G29980 | UM   |
| AT2G29990 | gbM  | gbM  | UM   | UM   | UM   | UM   | gbM  | UM   |
| AT2G29995 | UM   |
| AT2G30000 | UM   |



|           |      |      |     |     |     |     |      |     |
|-----------|------|------|-----|-----|-----|-----|------|-----|
| AT2G30010 | UM   | UM   | UM  | UM  | UM  | UM  | UM   | UM  |
| AT2G30020 | mCHG | mCHG | UM  | UM  | UM  | UM  | mCHH | UM  |
| AT2G30032 | UM   | UM   | UM  | UM  | UM  | UM  | UM   | UM  |
| AT2G30040 | UM   | UM   | UM  | UM  | UM  | UM  | UM   | UM  |
| AT2G30050 | gbM  | gbM  | gbM | gbM | gbM | gbM | gbM  | gbM |
| AT2G30060 | UM   | UM   | UM  | UM  | UM  | UM  | UM   | UM  |
| AT2G30070 | gbM  | mCHH | gbM | gbM | gbM | gbM | gbM  | gbM |
| AT2G30080 | UM   | UM   | UM  | UM  | UM  | UM  | UM   | UM  |
| AT2G30090 | UM   | UM   | UM  | UM  | UM  | UM  | UM   | UM  |
| AT2G30100 | UM   | UM   | UM  | UM  | UM  | UM  | UM   | UM  |
| AT2G30105 | UM   | UM   | UM  | UM  | UM  | UM  | UM   | UM  |
| AT2G30110 | gbM  | gbM  | gbM | gbM | gbM | gbM | gbM  | gbM |
| AT2G30120 | UM   | UM   | UM  | UM  | UM  | UM  | UM   | UM  |
| AT2G30130 | UM   | UM   | UM  | UM  | UM  | UM  | UM   | UM  |
| AT2G30140 | UM   | UM   | UM  | UM  | UM  | UM  | UM   | UM  |
| AT2G30150 | UM   | UM   | UM  | UM  | UM  | UM  | UM   | UM  |
| AT2G30160 | UM   | UM   | UM  | UM  | UM  | UM  | UM   | UM  |
| AT2G30170 | UM   | UM   | UM  | UM  | UM  | UM  | UM   | UM  |
| AT2G30200 | UM   | UM   | gbM | UM  | UM  | UM  | gbM  | UM  |
| AT2G30210 | UM   | UM   | UM  | UM  | UM  | UM  | UM   | UM  |
| AT2G30220 | UM   | UM   | UM  | UM  | UM  | UM  | UM   | UM  |
| AT2G30230 | UM   | UM   | UM  | UM  | UM  | UM  | UM   | UM  |
| AT2G30240 | UM   | UM   | UM  | UM  | UM  | UM  | UM   | UM  |
| AT2G30250 | UM   | UM   | UM  | UM  | UM  | UM  | mCHH | UM  |
| AT2G30260 | UM   | UM   | UM  | UM  | UM  | UM  | UM   | UM  |
| AT2G30270 | UM   | UM   | UM  | UM  | UM  | UM  | UM   | UM  |
| AT2G30280 | gbM  | gbM  | gbM | gbM | gbM | UM  | gbM  | UM  |
| AT2G30290 | UM   | gbM  | UM  | UM  | UM  | UM  | mCHH | UM  |
| AT2G30300 | UM   | UM   | UM  | UM  | UM  | UM  | mCHH | UM  |
| AT2G30310 | UM   | UM   | UM  | UM  | UM  | UM  | UM   | UM  |
| AT2G30320 | UM   | UM   | UM  | UM  | UM  | UM  | mCHG | UM  |
| AT2G30330 | UM   | UM   | UM  | UM  | UM  | UM  | UM   | UM  |
| AT2G30340 | UM   | UM   | UM  | UM  | UM  | UM  | UM   | UM  |
| AT2G30350 | UM   | UM   | UM  | UM  | UM  | UM  | UM   | UM  |
| AT2G30360 | UM   | UM   | UM  | UM  | UM  | UM  | UM   | UM  |
| AT2G30370 | UM   | UM   | UM  | UM  | UM  | UM  | UM   | UM  |
| AT2G30380 | UM   | UM   | UM  | UM  | UM  | UM  | UM   | UM  |
| AT2G30390 | UM   | UM   | UM  | UM  | UM  | UM  | UM   | UM  |
| AT2G30395 | UM   | UM   | UM  | UM  | UM  | UM  | UM   | UM  |
| AT2G30400 | UM   | UM   | UM  | UM  | UM  | UM  | UM   | UM  |
| AT2G30410 | UM   | UM   | UM  | UM  | UM  | UM  | UM   | UM  |
| AT2G30420 | UM   | UM   | UM  | UM  | UM  | UM  | UM   | UM  |
| AT2G30424 | UM   | UM   | UM  | UM  | UM  | UM  | UM   | UM  |
| AT2G30430 | UM   | UM   | UM  | UM  | UM  | UM  | UM   | UM  |
| AT2G30432 | UM   | UM   | UM  | UM  | UM  | UM  | UM   | UM  |
| AT2G30440 | UM   | UM   | UM  | UM  | UM  | UM  | UM   | UM  |
| AT2G30460 | UM   | UM   | UM  | UM  | UM  | UM  | UM   | UM  |
| AT2G30470 | gbM  | mCHH | gbM | gbM | gbM | gbM | mCHH | gbM |

|           |      |      |      |      |      |      |      |      |
|-----------|------|------|------|------|------|------|------|------|
| AT2G30480 | UM   |
| AT2G30490 | UM   |
| AT2G30500 | UM   | UM   | UM   | UM   | UM   | UM   | mCHH | UM   |
| AT2G30505 | gbM  |
| AT2G30520 | UM   |
| AT2G30530 | UM   |
| AT2G30540 | UM   |
| AT2G30550 | UM   |
| AT2G30560 | UM   |
| AT2G30570 | UM   |
| AT2G30575 | gbM  |
| AT2G30580 | UM   |
| AT2G30590 | UM   |
| AT2G30600 | UM   |
| AT2G30615 | mCHH | mCHH | mCHH | mCHG | mCHG | mCHG | mCHH | mCHG |
| AT2G30620 | UM   |
| AT2G30630 | UM   |
| AT2G30650 | UM   |
| AT2G30660 | UM   |
| AT2G30670 | UM   |
| AT2G30680 | UM   |
| AT2G30690 | UM   |
| AT2G30695 | UM   |
| AT2G30700 | gbM  |
| AT2G30710 | UM   | gbM  | UM   | UM   | UM   | UM   | gbM  | UM   |
| AT2G30720 | UM   | UM   | UM   | UM   | UM   | UM   | mCHH | UM   |
| AT2G30730 | mCHH |
| AT2G30740 | UM   | UM   | UM   | UM   | UM   | UM   | mCHG | UM   |
| AT2G30750 | UM   |
| AT2G30760 | UM   |
| AT2G30766 | UM   |
| AT2G30770 | UM   |
| AT2G30780 | UM   |
| AT2G30790 | UM   |
| AT2G30800 | gbM  |
| AT2G30810 | UM   |
| AT2G30820 | UM   |
| AT2G30830 | UM   |
| AT2G30840 | UM   |
| AT2G30860 | UM   |
| AT2G30870 | UM   |
| AT2G30880 | UM   | UM   | UM   | UM   | UM   | UM   | mCHH | UM   |
| AT2G30890 | UM   | UM   | UM   | UM   | UM   | UM   | mCHH | UM   |
| AT2G30900 | UM   |
| AT2G30910 | gbM  | UM   | gbM  | UM   | UM   | UM   | UM   | UM   |
| AT2G30920 | UM   |
| AT2G30925 | UM   |
| AT2G30930 | UM   |

|           |      |      |      |      |      |      |      |      |
|-----------|------|------|------|------|------|------|------|------|
| AT2G30933 | UM   |
| AT2G30940 | UM   |
| AT2G30942 | UM   |
| AT2G30950 | gbM  |
| AT2G30960 | mCHH | UM   | UM   | UM   | UM   | UM   | mCHH | UM   |
| AT2G30970 | UM   |
| AT2G30980 | UM   |
| AT2G30985 | UM   |
| AT2G30990 | UM   |
| AT2G31005 | UM   |
| AT2G31010 | gbM  |
| AT2G31018 | UM   |
| AT2G31020 | UM   |
| AT2G31030 | UM   | UM   | UM   | UM   | UM   | UM   | mCHH | UM   |
| AT2G31035 | UM   |
| AT2G31040 | UM   |
| AT2G31050 | UM   |
| AT2G31060 | UM   |
| AT2G31070 | UM   |
| AT2G31081 | UM   |
| AT2G31082 | UM   |
| AT2G31083 | UM   |
| AT2G31085 | UM   |
| AT2G31090 | UM   |
| AT2G31100 | UM   |
| AT2G31110 | UM   |
| AT2G31130 | UM   | mCHH | UM   | UM   | UM   | UM   | mCHH | UM   |
| AT2G31140 | UM   |
| AT2G31141 | UM   |
| AT2G31150 | UM   |
| AT2G31160 | UM   |
| AT2G31170 | gbM  |
| AT2G31180 | UM   |
| AT2G31190 | UM   |
| AT2G31200 | UM   |
| AT2G31210 | UM   |
| AT2G31215 | mCHH |
| AT2G31218 | UM   |
| AT2G31220 | UM   |
| AT2G31230 | UM   |
| AT2G31240 | UM   |
| AT2G31250 | UM   |
| AT2G31260 | gbM  |
| AT2G31270 | UM   | UM   | UM   | UM   | UM   | UM   | mCHH | UM   |
| AT2G31271 | UM   |
| AT2G31280 | UM   |
| AT2G31290 | UM   |
| AT2G31300 | gbM  | gbM  | gbM  | UM   | UM   | UM   | mCHH | UM   |



|           |     |      |     |     |     |     |      |     |
|-----------|-----|------|-----|-----|-----|-----|------|-----|
| AT2G31770 | UM  | UM   | UM  | UM  | UM  | UM  | UM   | UM  |
| AT2G31780 | UM  | UM   | UM  | UM  | UM  | UM  | UM   | UM  |
| AT2G31790 | UM  | UM   | UM  | UM  | UM  | UM  | UM   | UM  |
| AT2G31800 | UM  | UM   | UM  | UM  | UM  | UM  | UM   | UM  |
| AT2G31810 | UM  | UM   | UM  | UM  | UM  | UM  | UM   | UM  |
| AT2G31820 | gbM | gbM  | gbM | gbM | gbM | gbM | gbM  | gbM |
| AT2G31830 | gbM | gbM  | gbM | gbM | gbM | gbM | gbM  | gbM |
| AT2G31840 | UM  | UM   | UM  | UM  | UM  | UM  | UM   | UM  |
| AT2G31850 | UM  | UM   | UM  | UM  | UM  | UM  | UM   | UM  |
| AT2G31862 | UM  | UM   | UM  | UM  | UM  | UM  | UM   | UM  |
| AT2G31865 | UM  | UM   | UM  | UM  | UM  | UM  | UM   | UM  |
| AT2G31870 | UM  | UM   | UM  | UM  | UM  | UM  | UM   | UM  |
| AT2G31880 | UM  | UM   | UM  | UM  | UM  | UM  | UM   | UM  |
| AT2G31890 | gbM | mCHH | gbM | UM  | gbM | UM  | gbM  | UM  |
| AT2G31900 | gbM | gbM  | gbM | gbM | gbM | gbM | mCHH | gbM |
| AT2G31910 | UM  | UM   | UM  | UM  | UM  | UM  | mCHH | UM  |
| AT2G31920 | UM  | UM   | UM  | UM  | UM  | UM  | UM   | UM  |
| AT2G31930 | UM  | UM   | UM  | UM  | UM  | UM  | UM   | UM  |
| AT2G31940 | UM  | UM   | UM  | UM  | UM  | UM  | UM   | UM  |
| AT2G31945 | UM  | UM   | UM  | UM  | UM  | UM  | UM   | UM  |
| AT2G31953 | UM  | UM   | UM  | UM  | UM  | UM  | UM   | UM  |
| AT2G31955 | UM  | gbM  | UM  | UM  | UM  | UM  | gbM  | UM  |
| AT2G31957 | UM  | UM   | UM  | UM  | UM  | UM  | UM   | UM  |
| AT2G31960 | gbM | mCHH | gbM | gbM | gbM | gbM | mCHH | gbM |
| AT2G31970 | gbM | gbM  | gbM | gbM | gbM | gbM | mCHH | gbM |
| AT2G31980 | UM  | UM   | UM  | UM  | UM  | UM  | UM   | UM  |
| AT2G31981 | UM  | UM   | UM  | UM  | UM  | UM  | UM   | UM  |
| AT2G31985 | UM  | UM   | UM  | UM  | UM  | UM  | UM   | UM  |
| AT2G31990 | UM  | UM   | UM  | UM  | UM  | UM  | UM   | UM  |
| AT2G32000 | gbM | gbM  | gbM | gbM | gbM | gbM | gbM  | gbM |
| AT2G32010 | UM  | UM   | UM  | UM  | UM  | UM  | UM   | UM  |
| AT2G32020 | UM  | UM   | UM  | UM  | UM  | UM  | UM   | UM  |
| AT2G32030 | UM  | UM   | UM  | UM  | UM  | UM  | UM   | UM  |
| AT2G32040 | UM  | gbM  | UM  | UM  | UM  | UM  | UM   | UM  |
| AT2G32050 | UM  | UM   | UM  | UM  | UM  | UM  | UM   | UM  |
| AT2G32060 | UM  | UM   | UM  | UM  | UM  | UM  | UM   | UM  |
| AT2G32070 | UM  | UM   | UM  | UM  | UM  | UM  | UM   | UM  |
| AT2G32080 | UM  | UM   | UM  | UM  | UM  | UM  | UM   | UM  |
| AT2G32090 | UM  | UM   | UM  | UM  | UM  | UM  | UM   | UM  |
| AT2G32100 | UM  | UM   | UM  | UM  | UM  | UM  | UM   | UM  |
| AT2G32120 | gbM | gbM  | gbM | gbM | gbM | UM  | gbM  | gbM |
| AT2G32130 | UM  | UM   | UM  | UM  | UM  | UM  | UM   | UM  |
| AT2G32140 | UM  | UM   | UM  | UM  | UM  | UM  | UM   | UM  |
| AT2G32150 | UM  | UM   | UM  | UM  | UM  | UM  | UM   | UM  |
| AT2G32160 | UM  | UM   | UM  | UM  | UM  | UM  | mCHH | UM  |
| AT2G32170 | UM  | UM   | UM  | UM  | UM  | UM  | mCHH | UM  |
| AT2G32180 | UM  | UM   | UM  | UM  | UM  | UM  | UM   | UM  |
| AT2G32190 | UM  | UM   | UM  | UM  | UM  | UM  | UM   | UM  |

|           |      |      |      |     |     |     |      |     |
|-----------|------|------|------|-----|-----|-----|------|-----|
| AT2G32200 | UM   | UM   | UM   | UM  | UM  | UM  | UM   | UM  |
| AT2G32210 | UM   | UM   | UM   | UM  | UM  | UM  | UM   | UM  |
| AT2G32220 | UM   | UM   | UM   | UM  | UM  | UM  | UM   | UM  |
| AT2G32230 | UM   | UM   | UM   | UM  | UM  | UM  | UM   | UM  |
| AT2G32235 | UM   | UM   | UM   | UM  | UM  | UM  | UM   | UM  |
| AT2G32240 | mCHH | mCHH | mCHH | UM  | UM  | UM  | mCHH | UM  |
| AT2G32250 | mCHH | gbM  | gbM  | gbM | gbM | gbM | mCHH | gbM |
| AT2G32260 | UM   | UM   | UM   | UM  | UM  | UM  | UM   | UM  |
| AT2G32270 | UM   | UM   | UM   | UM  | UM  | UM  | UM   | UM  |
| AT2G32275 | UM   | UM   | UM   | UM  | UM  | UM  | UM   | UM  |
| AT2G32280 | UM   | UM   | UM   | UM  | UM  | UM  | UM   | UM  |
| AT2G32290 | UM   | UM   | UM   | UM  | UM  | UM  | UM   | UM  |
| AT2G32295 | UM   | UM   | UM   | UM  | UM  | UM  | mCHH | UM  |
| AT2G32300 | UM   | UM   | UM   | UM  | UM  | UM  | UM   | UM  |
| AT2G32310 | UM   | UM   | UM   | UM  | UM  | UM  | UM   | UM  |
| AT2G32320 | gbM  | gbM  | gbM  | UM  | UM  | UM  | mCHH | UM  |
| AT2G32340 | UM   | UM   | UM   | UM  | UM  | UM  | UM   | UM  |
| AT2G32350 | UM   | UM   | UM   | UM  | UM  | UM  | UM   | UM  |
| AT2G32360 | UM   | UM   | UM   | UM  | UM  | UM  | UM   | UM  |
| AT2G32370 | UM   | UM   | UM   | UM  | UM  | UM  | UM   | UM  |
| AT2G32380 | UM   | UM   | UM   | UM  | UM  | UM  | UM   | UM  |
| AT2G32390 | UM   | UM   | UM   | UM  | UM  | UM  | UM   | UM  |
| AT2G32400 | gbM  | gbM  | gbM  | gbM | gbM | gbM | gbM  | gbM |
| AT2G32410 | UM   | UM   | UM   | UM  | UM  | UM  | UM   | UM  |
| AT2G32415 | gbM  | mCHH | gbM  | gbM | gbM | gbM | mCHH | gbM |
| AT2G32430 | UM   | UM   | UM   | UM  | UM  | UM  | UM   | UM  |
| AT2G32440 | UM   | UM   | UM   | UM  | UM  | UM  | UM   | UM  |
| AT2G32450 | UM   | UM   | UM   | UM  | UM  | UM  | UM   | UM  |
| AT2G32460 | UM   | UM   | UM   | UM  | UM  | UM  | UM   | UM  |
| AT2G32470 | UM   | UM   | UM   | UM  | UM  | UM  | UM   | UM  |
| AT2G32480 | gbM  | UM   | gbM  | UM  | UM  | UM  | gbM  | UM  |
| AT2G32487 | UM   | UM   | UM   | UM  | UM  | UM  | UM   | UM  |
| AT2G32500 | UM   | UM   | UM   | UM  | UM  | UM  | UM   | UM  |
| AT2G32510 | UM   | UM   | UM   | UM  | UM  | UM  | UM   | UM  |
| AT2G32520 | UM   | UM   | UM   | UM  | UM  | UM  | UM   | UM  |
| AT2G32530 | UM   | UM   | UM   | UM  | UM  | UM  | UM   | UM  |
| AT2G32540 | UM   | UM   | UM   | UM  | UM  | UM  | mCHH | UM  |
| AT2G32550 | UM   | UM   | UM   | UM  | UM  | UM  | UM   | UM  |
| AT2G32560 | UM   | UM   | UM   | UM  | UM  | UM  | UM   | UM  |
| AT2G32580 | UM   | UM   | UM   | UM  | UM  | UM  | UM   | UM  |
| AT2G32590 | UM   | UM   | UM   | UM  | UM  | UM  | UM   | UM  |
| AT2G32600 | UM   | UM   | UM   | UM  | UM  | UM  | UM   | UM  |
| AT2G32610 | UM   | UM   | UM   | UM  | UM  | UM  | UM   | UM  |
| AT2G32620 | UM   | UM   | UM   | UM  | UM  | UM  | UM   | UM  |
| AT2G32630 | UM   | UM   | UM   | UM  | UM  | UM  | UM   | UM  |
| AT2G32640 | gbM  | gbM  | gbM  | UM  | UM  | UM  | gbM  | UM  |
| AT2G32645 | UM   | UM   | UM   | UM  | UM  | UM  | UM   | UM  |
| AT2G32650 | UM   | UM   | UM   | UM  | UM  | UM  | UM   | UM  |

|           |      |      |     |     |     |     |      |     |
|-----------|------|------|-----|-----|-----|-----|------|-----|
| AT2G32660 | UM   | UM   | UM  | UM  | UM  | UM  | UM   | UM  |
| AT2G32670 | UM   | UM   | UM  | UM  | UM  | UM  | UM   | UM  |
| AT2G32680 | UM   | UM   | UM  | UM  | UM  | UM  | mCHH | UM  |
| AT2G32690 | UM   | UM   | UM  | UM  | UM  | UM  | UM   | UM  |
| AT2G32700 | gbM  | gbM  | gbM | gbM | gbM | gbM | gbM  | gbM |
| AT2G32710 | UM   | UM   | UM  | UM  | UM  | UM  | UM   | UM  |
| AT2G32720 | UM   | UM   | UM  | UM  | UM  | UM  | UM   | UM  |
| AT2G32730 | gbM  | gbM  | gbM | gbM | gbM | gbM | mCHH | gbM |
| AT2G32740 | UM   | UM   | UM  | UM  | UM  | UM  | UM   | UM  |
| AT2G32750 | UM   | UM   | UM  | UM  | UM  | UM  | UM   | UM  |
| AT2G32760 | UM   | UM   | UM  | UM  | UM  | UM  | UM   | UM  |
| AT2G32765 | UM   | UM   | UM  | UM  | UM  | UM  | UM   | UM  |
| AT2G32770 | UM   | UM   | UM  | UM  | UM  | UM  | UM   | UM  |
| AT2G32780 | UM   | UM   | UM  | UM  | UM  | UM  | UM   | UM  |
| AT2G32785 | UM   | mCHH | UM  | UM  | UM  | UM  | UM   | UM  |
| AT2G32788 | UM   | UM   | UM  | UM  | UM  | UM  | UM   | UM  |
| AT2G32790 | UM   | UM   | UM  | UM  | UM  | UM  | UM   | UM  |
| AT2G32800 | UM   | UM   | UM  | UM  | UM  | UM  | UM   | UM  |
| AT2G32810 | gbM  | gbM  | gbM | gbM | gbM | UM  | mCHH | UM  |
| AT2G32820 | UM   | UM   | UM  | UM  | UM  | UM  | UM   | UM  |
| AT2G32830 | UM   | UM   | UM  | UM  | UM  | UM  | UM   | UM  |
| AT2G32835 | UM   | UM   | UM  | UM  | UM  | UM  | UM   | UM  |
| AT2G32840 | UM   | UM   | UM  | UM  | UM  | UM  | UM   | UM  |
| AT2G32850 | gbM  | gbM  | gbM | gbM | gbM | gbM | mCHH | gbM |
| AT2G32860 | UM   | UM   | UM  | UM  | UM  | UM  | UM   | UM  |
| AT2G32870 | UM   | UM   | UM  | UM  | UM  | UM  | UM   | UM  |
| AT2G32880 | UM   | UM   | UM  | UM  | UM  | UM  | UM   | UM  |
| AT2G32885 | UM   | UM   | UM  | UM  | UM  | UM  | UM   | UM  |
| AT2G32890 | UM   | UM   | UM  | UM  | UM  | UM  | UM   | UM  |
| AT2G32900 | UM   | UM   | UM  | UM  | UM  | UM  | UM   | UM  |
| AT2G32905 | UM   | UM   | UM  | UM  | UM  | UM  | UM   | UM  |
| AT2G32910 | mCHG | gbM  | gbM | gbM | gbM | gbM | mCHH | gbM |
| AT2G32920 | UM   | UM   | UM  | UM  | UM  | UM  | UM   | UM  |
| AT2G32930 | UM   | UM   | UM  | UM  | UM  | UM  | UM   | UM  |
| AT2G32940 | UM   | UM   | UM  | UM  | UM  | UM  | mCHH | UM  |
| AT2G32950 | gbM  | mCHH | gbM | gbM | gbM | gbM | mCHH | gbM |
| AT2G32960 | UM   | UM   | UM  | UM  | UM  | UM  | UM   | UM  |
| AT2G32970 | gbM  | gbM  | gbM | gbM | gbM | gbM | gbM  | UM  |
| AT2G32980 | UM   | UM   | UM  | UM  | UM  | UM  | mCHH | UM  |
| AT2G32990 | UM   | UM   | UM  | UM  | UM  | UM  | UM   | UM  |
| AT2G33000 | UM   | UM   | UM  | UM  | UM  | UM  | UM   | UM  |
| AT2G33006 | mCHG | mCHG | gbM | gbM | gbM | gbM | gbM  | gbM |
| AT2G33010 | UM   | UM   | UM  | UM  | UM  | UM  | UM   | UM  |
| AT2G33020 | UM   | mCHH | UM  | UM  | UM  | UM  | mCHH | UM  |
| AT2G33030 | UM   | UM   | UM  | UM  | UM  | UM  | UM   | UM  |
| AT2G33040 | UM   | UM   | UM  | UM  | UM  | UM  | UM   | UM  |
| AT2G33050 | UM   | UM   | UM  | gbM | UM  | UM  | UM   | UM  |
| AT2G33060 | UM   | UM   | gbM | UM  | UM  | UM  | UM   | UM  |

|           |      |      |      |      |      |      |      |      |
|-----------|------|------|------|------|------|------|------|------|
| AT2G33070 | UM   |
| AT2G33080 | UM   |
| AT2G33090 | UM   |
| AT2G33100 | UM   |
| AT2G33110 | UM   |
| AT2G33120 | UM   |
| AT2G33130 | UM   |
| AT2G33150 | UM   |
| AT2G33160 | UM   |
| AT2G33170 | gbM  | gbM  | gbM  | UM   | gbM  | gbM  | gbM  | UM   |
| AT2G33175 | mCHH |
| AT2G33180 | UM   |
| AT2G33190 | UM   |
| AT2G33200 | UM   |
| AT2G33205 | UM   |
| AT2G33210 | gbM  | gbM  | gbM  | gbM  | UM   | UM   | mCHH | UM   |
| AT2G33220 | UM   |
| AT2G33230 | UM   |
| AT2G33233 | UM   |
| AT2G33240 | gbM  | gbM  | gbM  | gbM  | gbM  | gbM  | mCHH | gbM  |
| AT2G33250 | UM   |
| AT2G33255 | UM   |
| AT2G33260 | UM   |
| AT2G33270 | UM   |
| AT2G33280 | UM   |
| AT2G33290 | UM   |
| AT2G33300 | UM   |
| AT2G33310 | UM   |
| AT2G33320 | UM   |
| AT2G33330 | UM   |
| AT2G33340 | UM   |
| AT2G33350 | UM   |
| AT2G33360 | gbM  | gbM  | gbM  | gbM  | gbM  | gbM  | mCHH | gbM  |
| AT2G33370 | UM   |
| AT2G33380 | UM   | mCHH | UM   | UM   | UM   | UM   | UM   | UM   |
| AT2G33385 | UM   |
| AT2G33390 | UM   |
| AT2G33400 | mCHH | UM   |
| AT2G33410 | UM   |
| AT2G33420 | UM   |
| AT2G33430 | UM   |
| AT2G33435 | mCHH | mCHH | mCHH | gbM  | gbM  | gbM  | mCHH | gbM  |
| AT2G33440 | gbM  | mCHH | gbM  | UM   | UM   | UM   | gbM  | UM   |
| AT2G33450 | UM   |
| AT2G33460 | UM   | UM   | UM   | UM   | UM   | UM   | gbM  | UM   |
| AT2G33470 | UM   |
| AT2G33480 | UM   |
| AT2G33490 | UM   | gbM  | UM   | gbM  | gbM  | UM   | mCHH | UM   |



|           |     |      |     |     |     |     |     |     |
|-----------|-----|------|-----|-----|-----|-----|-----|-----|
| AT2G33500 | UM  | UM   | UM  | UM  | UM  | UM  | UM  | UM  |
| AT2G33509 | UM  | UM   | UM  | UM  | UM  | UM  | UM  | UM  |
| AT2G33510 | UM  | mCHH | UM  | UM  | UM  | UM  | UM  | UM  |
| AT2G33520 | UM  | UM   | UM  | UM  | UM  | UM  | UM  | UM  |
| AT2G33530 | UM  | UM   | UM  | UM  | UM  | UM  | UM  | UM  |
| AT2G33540 | UM  | UM   | UM  | UM  | UM  | UM  | UM  | UM  |
| AT2G33550 | UM  | UM   | UM  | UM  | UM  | UM  | UM  | UM  |
| AT2G33560 | UM  | UM   | UM  | UM  | UM  | UM  | UM  | UM  |
| AT2G33570 | UM  | UM   | UM  | UM  | UM  | UM  | UM  | UM  |
| AT2G33580 | UM  | UM   | UM  | UM  | UM  | UM  | UM  | UM  |
| AT2G33585 | UM  | UM   | UM  | UM  | UM  | UM  | UM  | UM  |
| AT2G33590 | UM  | UM   | UM  | UM  | UM  | UM  | UM  | UM  |
| AT2G33600 | UM  | UM   | UM  | UM  | UM  | UM  | UM  | UM  |
| AT2G33610 | UM  | UM   | UM  | UM  | UM  | UM  | UM  | UM  |
| AT2G33620 | UM  | UM   | UM  | UM  | UM  | UM  | UM  | UM  |
| AT2G33630 | UM  | UM   | UM  | UM  | UM  | UM  | UM  | UM  |
| AT2G33640 | gbM | gbM  | gbM | gbM | gbM | gbM | gbM | UM  |
| AT2G33655 | UM  | UM   | UM  | UM  | UM  | UM  | UM  | UM  |
| AT2G33670 | UM  | UM   | UM  | UM  | UM  | UM  | UM  | UM  |
| AT2G33680 | gbM | gbM  | gbM | gbM | gbM | gbM | gbM | gbM |
| AT2G33690 | UM  | UM   | UM  | UM  | UM  | UM  | UM  | UM  |
| AT2G33700 | UM  | UM   | UM  | UM  | UM  | UM  | UM  | UM  |
| AT2G33705 | UM  | UM   | UM  | UM  | UM  | UM  | UM  | UM  |
| AT2G33710 | UM  | UM   | UM  | UM  | UM  | UM  | UM  | UM  |
| AT2G33720 | UM  | UM   | UM  | UM  | UM  | UM  | UM  | UM  |
| AT2G33730 | UM  | gbM  | UM  | UM  | UM  | UM  | UM  | UM  |
| AT2G33735 | UM  | UM   | UM  | UM  | UM  | UM  | UM  | UM  |
| AT2G33740 | UM  | UM   | UM  | UM  | UM  | UM  | UM  | UM  |
| AT2G33750 | UM  | UM   | UM  | UM  | UM  | UM  | UM  | UM  |
| AT2G33760 | UM  | UM   | UM  | UM  | UM  | UM  | UM  | UM  |
| AT2G33770 | gbM | gbM  | gbM | gbM | gbM | gbM | gbM | gbM |
| AT2G33775 | UM  | UM   | UM  | UM  | UM  | UM  | UM  | UM  |
| AT2G33780 | UM  | UM   | UM  | UM  | UM  | UM  | UM  | UM  |
| AT2G33790 | UM  | UM   | UM  | UM  | UM  | UM  | UM  | UM  |
| AT2G33793 | UM  | UM   | UM  | UM  | UM  | UM  | UM  | UM  |
| AT2G33796 | UM  | UM   | UM  | UM  | UM  | UM  | UM  | UM  |
| AT2G33800 | UM  | UM   | UM  | UM  | UM  | UM  | UM  | UM  |
| AT2G33810 | UM  | UM   | UM  | UM  | UM  | UM  | UM  | UM  |
| AT2G33820 | UM  | UM   | UM  | UM  | UM  | UM  | UM  | UM  |
| AT2G33830 | UM  | UM   | UM  | UM  | UM  | UM  | UM  | UM  |
| AT2G33835 | gbM | gbM  | gbM | gbM | gbM | gbM | gbM | gbM |
| AT2G33840 | UM  | UM   | UM  | UM  | UM  | UM  | UM  | UM  |
| AT2G33845 | UM  | UM   | UM  | UM  | UM  | UM  | UM  | UM  |
| AT2G33847 | UM  | UM   | UM  | UM  | UM  | UM  | UM  | UM  |
| AT2G33850 | UM  | UM   | UM  | UM  | UM  | UM  | UM  | UM  |
| AT2G33855 | UM  | UM   | UM  | UM  | UM  | UM  | UM  | UM  |
| AT2G33860 | UM  | UM   | UM  | UM  | UM  | UM  | UM  | UM  |
| AT2G33870 | UM  | UM   | UM  | UM  | UM  | UM  | UM  | UM  |

|           |      |      |      |      |      |      |      |      |
|-----------|------|------|------|------|------|------|------|------|
| AT2G33880 | UM   |
| AT2G33980 | UM   |
| AT2G33990 | gbM  | UM   | UM   | UM   | UM   | UM   | mCHH | UM   |
| AT2G34000 | UM   |
| AT2G34010 | UM   |
| AT2G34020 | UM   | UM   | UM   | UM   | UM   | UM   | mCHH | UM   |
| AT2G34030 | UM   |
| AT2G34040 | UM   | UM   | UM   | UM   | UM   | UM   | mCHH | UM   |
| AT2G34050 | UM   |
| AT2G34060 | UM   |
| AT2G34070 | UM   |
| AT2G34080 | UM   |
| AT2G34090 | gbM  | gbM  | gbM  | gbM  | gbM  | UM   | gbM  | UM   |
| AT2G34100 | UM   |
| AT2G34110 | mCHH |
| AT2G34120 | mCHH |
| AT2G34123 | UM   |
| AT2G34140 | UM   |
| AT2G34150 | UM   | UM   | UM   | UM   | UM   | UM   | mCHH | UM   |
| AT2G34160 | UM   |
| AT2G34170 | UM   |
| AT2G34180 | UM   |
| AT2G34185 | UM   |
| AT2G34186 | UM   |
| AT2G34190 | UM   |
| AT2G34200 | UM   |
| AT2G34210 | UM   | UM   | UM   | UM   | UM   | UM   | mCHH | UM   |
| AT2G34220 | UM   | UM   | UM   | UM   | UM   | UM   | mCHH | UM   |
| AT2G34224 | UM   |
| AT2G34230 | UM   |
| AT2G34238 | UM   |
| AT2G34240 | UM   |
| AT2G34250 | gbM  |
| AT2G34260 | UM   |
| AT2G34270 | UM   |
| AT2G34280 | UM   |
| AT2G34290 | mCHH | mCHH | mCHH | mCHG | mCHH | mCHG | mCHH | mCHH |
| AT2G34300 | UM   | UM   | UM   | UM   | UM   | UM   | mCHH | UM   |
| AT2G34310 | UM   |
| AT2G34315 | UM   |
| AT2G34320 | UM   |
| AT2G34330 | UM   |
| AT2G34340 | UM   |
| AT2G34350 | UM   |
| AT2G34355 | UM   |
| AT2G34357 | gbM  |
| AT2G34360 | UM   |
| AT2G34370 | UM   |

|           |      |      |      |     |      |     |      |     |
|-----------|------|------|------|-----|------|-----|------|-----|
| AT2G34380 | UM   | UM   | UM   | UM  | UM   | UM  | UM   | UM  |
| AT2G34390 | UM   | UM   | UM   | UM  | UM   | UM  | UM   | UM  |
| AT2G34400 | UM   | UM   | UM   | UM  | UM   | UM  | UM   | UM  |
| AT2G34410 | UM   | UM   | UM   | UM  | UM   | UM  | UM   | UM  |
| AT2G34420 | UM   | UM   | UM   | UM  | UM   | UM  | UM   | UM  |
| AT2G34430 | UM   | UM   | UM   | UM  | UM   | UM  | UM   | UM  |
| AT2G34440 | gbM  | gbM  | gbM  | UM  | gbM  | UM  | gbM  | UM  |
| AT2G34450 | UM   | UM   | UM   | UM  | UM   | UM  | UM   | UM  |
| AT2G34460 | UM   | UM   | UM   | UM  | UM   | UM  | UM   | UM  |
| AT2G34470 | UM   | UM   | UM   | UM  | UM   | UM  | UM   | UM  |
| AT2G34480 | UM   | UM   | UM   | UM  | UM   | UM  | UM   | UM  |
| AT2G34490 | UM   | UM   | UM   | UM  | UM   | UM  | UM   | UM  |
| AT2G34500 | UM   | UM   | UM   | UM  | UM   | UM  | UM   | UM  |
| AT2G34510 | UM   | UM   | UM   | UM  | UM   | UM  | UM   | UM  |
| AT2G34520 | UM   | UM   | UM   | UM  | UM   | UM  | UM   | UM  |
| AT2G34530 | mCHH | UM   | UM   | UM  | UM   | UM  | UM   | UM  |
| AT2G34540 | UM   | UM   | UM   | UM  | UM   | UM  | UM   | UM  |
| AT2G34555 | UM   | UM   | UM   | UM  | UM   | UM  | UM   | UM  |
| AT2G34560 | UM   | UM   | UM   | UM  | UM   | UM  | UM   | UM  |
| AT2G34570 | UM   | UM   | UM   | UM  | UM   | UM  | UM   | UM  |
| AT2G34580 | UM   | UM   | UM   | UM  | UM   | UM  | UM   | UM  |
| AT2G34585 | UM   | UM   | UM   | UM  | UM   | UM  | UM   | UM  |
| AT2G34590 | UM   | mCHH | UM   | UM  | UM   | UM  | UM   | UM  |
| AT2G34600 | UM   | UM   | UM   | UM  | UM   | UM  | UM   | UM  |
| AT2G34610 | UM   | UM   | UM   | UM  | UM   | UM  | UM   | UM  |
| AT2G34620 | UM   | UM   | UM   | UM  | UM   | UM  | UM   | UM  |
| AT2G34630 | gbM  | gbM  | gbM  | gbM | gbM  | gbM | gbM  | gbM |
| AT2G34640 | gbM  | gbM  | gbM  | gbM | gbM  | gbM | gbM  | gbM |
| AT2G34650 | UM   | UM   | UM   | UM  | UM   | UM  | UM   | UM  |
| AT2G34655 | mCHH | mCHH | mCHH | UM  | mCHH | UM  | mCHH | UM  |
| AT2G34660 | gbM  | mCHH | gbM  | gbM | gbM  | gbM | mCHH | gbM |
| AT2G34670 | UM   | UM   | UM   | UM  | UM   | UM  | UM   | UM  |
| AT2G34680 | gbM  | gbM  | gbM  | gbM | gbM  | gbM | gbM  | gbM |
| AT2G34690 | UM   | UM   | UM   | UM  | UM   | UM  | UM   | UM  |
| AT2G34700 | UM   | UM   | UM   | UM  | UM   | UM  | UM   | UM  |
| AT2G34710 | gbM  | gbM  | UM   | UM  | UM   | UM  | mCHH | UM  |
| AT2G34720 | UM   | UM   | UM   | UM  | UM   | UM  | UM   | UM  |
| AT2G34730 | gbM  | mCHH | gbM  | gbM | gbM  | gbM | mCHH | gbM |
| AT2G34740 | UM   | UM   | UM   | UM  | UM   | UM  | UM   | UM  |
| AT2G34750 | UM   | UM   | UM   | UM  | UM   | UM  | UM   | UM  |
| AT2G34770 | UM   | UM   | UM   | UM  | gbM  | UM  | UM   | UM  |
| AT2G34780 | gbM  | mCHH | gbM  | UM  | gbM  | gbM | mCHH | gbM |
| AT2G34790 | UM   | UM   | UM   | UM  | UM   | UM  | UM   | UM  |
| AT2G34800 | UM   | UM   | UM   | UM  | UM   | UM  | UM   | UM  |
| AT2G34810 | UM   | UM   | UM   | UM  | UM   | UM  | UM   | UM  |
| AT2G34820 | UM   | UM   | UM   | UM  | UM   | UM  | UM   | UM  |
| AT2G34825 | UM   | UM   | UM   | UM  | UM   | UM  | UM   | UM  |
| AT2G34830 | UM   | UM   | UM   | UM  | UM   | UM  | UM   | UM  |













|           |      |      |      |      |      |      |      |      |
|-----------|------|------|------|------|------|------|------|------|
| AT2G37025 | UM   |
| AT2G37030 | UM   |
| AT2G37035 | UM   |
| AT2G37040 | UM   |
| AT2G37050 | gbM  | mCHH | gbM  | gbM  | gbM  | gbM  | mCHH | gbM  |
| AT2G37060 | UM   |
| AT2G37070 | UM   | UM   | UM   | UM   | UM   | UM   | gbM  | UM   |
| AT2G37080 | gbM  | mCHH | gbM  | gbM  | gbM  | gbM  | mCHH | gbM  |
| AT2G37090 | UM   |
| AT2G37100 | UM   |
| AT2G37110 | UM   |
| AT2G37120 | UM   |
| AT2G37130 | UM   |
| AT2G37140 | UM   |
| AT2G37150 | UM   |
| AT2G37160 | UM   |
| AT2G37170 | UM   |
| AT2G37180 | UM   |
| AT2G37190 | UM   |
| AT2G37195 | UM   |
| AT2G37200 | UM   |
| AT2G37210 | UM   |
| AT2G37220 | UM   |
| AT2G37230 | gbM  | gbM  | gbM  | UM   | gbM  | UM   | gbM  | UM   |
| AT2G37240 | UM   |
| AT2G37250 | UM   |
| AT2G37260 | UM   |
| AT2G37270 | UM   |
| AT2G37280 | UM   | mCHH | UM   | UM   | UM   | UM   | mCHH | UM   |
| AT2G37290 | UM   | mCHH | UM   | UM   | UM   | UM   | mCHH | UM   |
| AT2G37300 | UM   |
| AT2G37310 | UM   |
| AT2G37320 | UM   |
| AT2G37330 | UM   |
| AT2G37340 | gbM  |
| AT2G37360 | gbM  | UM   |
| AT2G37370 | mCHH |
| AT2G37380 | UM   |
| AT2G37390 | UM   |
| AT2G37400 | UM   |
| AT2G37410 | UM   |
| AT2G37420 | UM   | UM   | UM   | UM   | UM   | UM   | mCHH | UM   |
| AT2G37430 | UM   |
| AT2G37435 | UM   |
| AT2G37440 | UM   |
| AT2G37450 | UM   |
| AT2G37460 | UM   |
| AT2G37470 | UM   |

|           |     |      |     |     |     |     |      |     |
|-----------|-----|------|-----|-----|-----|-----|------|-----|
| AT2G37478 | UM  | UM   | UM  | UM  | UM  | UM  | UM   | UM  |
| AT2G37480 | UM  | UM   | UM  | UM  | UM  | UM  | UM   | UM  |
| AT2G37500 | UM  | UM   | UM  | UM  | UM  | UM  | UM   | UM  |
| AT2G37510 | UM  | UM   | UM  | UM  | UM  | UM  | UM   | UM  |
| AT2G37520 | UM  | UM   | UM  | UM  | UM  | UM  | UM   | UM  |
| AT2G37530 | UM  | UM   | UM  | UM  | UM  | UM  | UM   | UM  |
| AT2G37540 | UM  | UM   | UM  | UM  | UM  | UM  | UM   | UM  |
| AT2G37550 | UM  | UM   | UM  | UM  | UM  | UM  | UM   | UM  |
| AT2G37560 | UM  | UM   | UM  | UM  | UM  | UM  | UM   | UM  |
| AT2G37570 | gbM | gbM  | gbM | gbM | gbM | gbM | gbM  | gbM |
| AT2G37580 | UM  | UM   | UM  | UM  | UM  | UM  | UM   | UM  |
| AT2G37585 | UM  | UM   | UM  | UM  | UM  | UM  | UM   | UM  |
| AT2G37590 | UM  | UM   | UM  | UM  | UM  | UM  | UM   | UM  |
| AT2G37600 | UM  | UM   | UM  | UM  | UM  | UM  | UM   | UM  |
| AT2G37610 | UM  | UM   | UM  | UM  | UM  | UM  | UM   | UM  |
| AT2G37620 | UM  | UM   | UM  | UM  | UM  | UM  | UM   | UM  |
| AT2G37630 | UM  | UM   | UM  | UM  | UM  | UM  | UM   | UM  |
| AT2G37640 | UM  | UM   | UM  | UM  | UM  | UM  | UM   | UM  |
| AT2G37650 | UM  | UM   | UM  | UM  | UM  | UM  | mCHH | UM  |
| AT2G37660 | UM  | UM   | UM  | UM  | UM  | UM  | UM   | UM  |
| AT2G37670 | UM  | mCHH | UM  | UM  | UM  | UM  | UM   | UM  |
| AT2G37678 | UM  | UM   | UM  | UM  | UM  | UM  | UM   | UM  |
| AT2G37680 | UM  | UM   | UM  | UM  | UM  | UM  | UM   | UM  |
| AT2G37690 | UM  | gbM  | UM  | UM  | UM  | UM  | UM   | UM  |
| AT2G37700 | UM  | UM   | UM  | UM  | UM  | UM  | UM   | UM  |
| AT2G37710 | UM  | UM   | UM  | UM  | UM  | UM  | UM   | UM  |
| AT2G37720 | UM  | UM   | UM  | UM  | UM  | UM  | UM   | UM  |
| AT2G37730 | UM  | UM   | UM  | UM  | UM  | UM  | UM   | UM  |
| AT2G37740 | UM  | UM   | UM  | UM  | UM  | UM  | UM   | UM  |
| AT2G37750 | UM  | UM   | UM  | UM  | UM  | UM  | UM   | UM  |
| AT2G37760 | UM  | UM   | UM  | UM  | UM  | UM  | UM   | UM  |
| AT2G37770 | UM  | UM   | UM  | UM  | UM  | UM  | UM   | UM  |
| AT2G37780 | UM  | UM   | UM  | UM  | UM  | UM  | UM   | UM  |
| AT2G37790 | UM  | UM   | UM  | UM  | UM  | UM  | UM   | UM  |
| AT2G37800 | UM  | UM   | UM  | UM  | UM  | UM  | UM   | UM  |
| AT2G37810 | UM  | UM   | UM  | UM  | UM  | UM  | UM   | UM  |
| AT2G37820 | UM  | UM   | UM  | UM  | UM  | UM  | UM   | UM  |
| AT2G37840 | gbM | gbM  | gbM | UM  | UM  | UM  | gbM  | UM  |
| AT2G37860 | UM  | UM   | UM  | UM  | UM  | UM  | UM   | UM  |
| AT2G37870 | UM  | UM   | UM  | UM  | UM  | UM  | UM   | UM  |
| AT2G37880 | UM  | UM   | UM  | UM  | UM  | UM  | UM   | UM  |
| AT2G37890 | UM  | UM   | UM  | UM  | UM  | UM  | UM   | UM  |
| AT2G37900 | UM  | UM   | UM  | UM  | UM  | UM  | UM   | UM  |
| AT2G37910 | UM  | UM   | UM  | UM  | UM  | UM  | UM   | UM  |
| AT2G37920 | UM  | UM   | UM  | UM  | UM  | UM  | UM   | UM  |
| AT2G37925 | UM  | UM   | UM  | UM  | UM  | UM  | UM   | UM  |
| AT2G37930 | UM  | UM   | UM  | UM  | UM  | UM  | UM   | UM  |
| AT2G37940 | UM  | UM   | UM  | UM  | UM  | UM  | UM   | UM  |



|           |      |      |      |      |      |      |      |      |
|-----------|------|------|------|------|------|------|------|------|
| AT2G38390 | UM   |
| AT2G38400 | UM   |
| AT2G38410 | gbM  | gbM  | gbM  | UM   | gbM  | UM   | gbM  | gbM  |
| AT2G38420 | UM   |
| AT2G38430 | UM   |
| AT2G38440 | gbM  | mCHH | gbM  | gbM  | gbM  | gbM  | mCHH | gbM  |
| AT2G38450 | UM   |
| AT2G38460 | UM   |
| AT2G38465 | UM   |
| AT2G38470 | UM   |
| AT2G38480 | UM   |
| AT2G38490 | UM   |
| AT2G38500 | UM   |
| AT2G38510 | UM   |
| AT2G38530 | UM   |
| AT2G38540 | UM   |
| AT2G38544 | UM   |
| AT2G38550 | UM   |
| AT2G38560 | UM   |
| AT2G38570 | UM   |
| AT2G38580 | UM   |
| AT2G38590 | mCHH |
| AT2G38600 | UM   |
| AT2G38610 | UM   |
| AT2G38620 | UM   |
| AT2G38630 | UM   |
| AT2G38640 | UM   |
| AT2G38646 | UM   |
| AT2G38650 | UM   |
| AT2G38660 | gbM  | gbM  | UM   | UM   | UM   | UM   | gbM  | UM   |
| AT2G38670 | UM   |
| AT2G38680 | UM   |
| AT2G38690 | UM   |
| AT2G38695 | UM   |
| AT2G38700 | UM   |
| AT2G38710 | UM   | gbM  | UM   | UM   | UM   | UM   | gbM  | UM   |
| AT2G38720 | UM   |
| AT2G38730 | UM   |
| AT2G38740 | UM   | UM   | UM   | UM   | UM   | UM   | mCHH | UM   |
| AT2G38750 | UM   |
| AT2G38760 | UM   |
| AT2G38770 | gbM  |
| AT2G38780 | UM   |
| AT2G38790 | UM   |
| AT2G38800 | UM   |
| AT2G38810 | UM   |
| AT2G38820 | UM   |
| AT2G38823 | UM   |

|           |      |      |      |      |      |      |      |      |
|-----------|------|------|------|------|------|------|------|------|
| AT2G38830 | UM   |
| AT2G38840 | gbM  | mCHH | gbM  | gbM  | gbM  | gbM  | mCHH | gbM  |
| AT2G38860 | UM   |
| AT2G38870 | UM   |
| AT2G38880 | UM   |
| AT2G38890 | UM   | UM   | UM   | UM   | UM   | UM   | mCHH | UM   |
| AT2G38900 | UM   |
| AT2G38905 | UM   |
| AT2G38910 | UM   | UM   | UM   | UM   | UM   | UM   | mCHG | UM   |
| AT2G38920 | UM   |
| AT2G38940 | UM   | mCHH | UM   | UM   | UM   | UM   | UM   | UM   |
| AT2G38950 | gbM  | gbM  | UM   | UM   | UM   | gbM  | UM   | UM   |
| AT2G38960 | UM   |
| AT2G38970 | UM   |
| AT2G38995 | UM   | UM   | UM   | UM   | UM   | UM   | mCHH | UM   |
| AT2G39000 | UM   |
| AT2G39010 | UM   |
| AT2G39020 | UM   |
| AT2G39030 | UM   |
| AT2G39040 | UM   |
| AT2G39050 | UM   |
| AT2G39060 | UM   |
| AT2G39080 | UM   |
| AT2G39090 | gbM  | gbM  | UM   | UM   | UM   | UM   | mCHH | UM   |
| AT2G39100 | UM   |
| AT2G39110 | UM   |
| AT2G39120 | UM   |
| AT2G39130 | UM   |
| AT2G39140 | UM   |
| AT2G39160 | mCHH | mCHH | mCHH | mCHG | mCHH | mCHG | mCHH | mCHG |
| AT2G39170 | gbM  | gbM  | gbM  | gbM  | gbM  | UM   | gbM  | UM   |
| AT2G39180 | UM   |
| AT2G39190 | gbM  | gbM  | gbM  | UM   | UM   | UM   | gbM  | UM   |
| AT2G39200 | UM   |
| AT2G39210 | UM   |
| AT2G39220 | UM   |
| AT2G39230 | UM   |
| AT2G39240 | UM   |
| AT2G39250 | UM   |
| AT2G39260 | gbM  | mCHH | gbM  | gbM  | gbM  | gbM  | mCHH | gbM  |
| AT2G39270 | UM   | UM   | UM   | UM   | UM   | UM   | mCHH | UM   |
| AT2G39280 | gbM  | gbM  | gbM  | UM   | UM   | UM   | gbM  | UM   |
| AT2G39290 | UM   |
| AT2G39300 | UM   | UM   | UM   | UM   | UM   | UM   | mCHH | UM   |
| AT2G39310 | UM   |
| AT2G39320 | UM   | UM   | UM   | UM   | UM   | UM   | mCHH | UM   |
| AT2G39330 | UM   |
| AT2G39340 | gbM  | mCHH | gbM  | gbM  | gbM  | gbM  | gbM  | gbM  |





|           |      |      |      |      |      |      |      |      |
|-----------|------|------|------|------|------|------|------|------|
| AT2G40170 | UM   |
| AT2G40180 | UM   |
| AT2G40190 | UM   |
| AT2G40200 | UM   |
| AT2G40205 | UM   |
| AT2G40210 | UM   |
| AT2G40220 | UM   |
| AT2G40230 | UM   |
| AT2G40233 | UM   |
| AT2G40240 | UM   |
| AT2G40250 | UM   |
| AT2G40260 | UM   |
| AT2G40270 | UM   | UM   | UM   | UM   | UM   | UM   | mCHH | UM   |
| AT2G40280 | UM   |
| AT2G40290 | UM   |
| AT2G40300 | UM   |
| AT2G40310 | mCHH |
| AT2G40316 | UM   | UM   | UM   | UM   | UM   | UM   | mCHH | UM   |
| AT2G40320 | UM   |
| AT2G40330 | UM   |
| AT2G40340 | UM   |
| AT2G40350 | UM   |
| AT2G40360 | UM   | UM   | UM   | UM   | UM   | UM   | mCHH | UM   |
| AT2G40370 | UM   |
| AT2G40380 | UM   |
| AT2G40390 | UM   |
| AT2G40400 | UM   |
| AT2G40410 | UM   |
| AT2G40420 | UM   | UM   | UM   | UM   | UM   | UM   | mCHH | UM   |
| AT2G40430 | UM   | UM   | UM   | UM   | UM   | UM   | mCHH | UM   |
| AT2G40435 | UM   |
| AT2G40440 | UM   |
| AT2G40450 | UM   |
| AT2G40460 | UM   |
| AT2G40470 | UM   |
| AT2G40475 | UM   |
| AT2G40480 | UM   | mCHH | UM   | UM   | UM   | UM   | UM   | UM   |
| AT2G40490 | UM   |
| AT2G40500 | UM   |
| AT2G40510 | UM   |
| AT2G40520 | UM   |
| AT2G40530 | UM   |
| AT2G40540 | UM   |
| AT2G40550 | UM   |
| AT2G40560 | UM   |
| AT2G40570 | UM   |
| AT2G40580 | UM   |
| AT2G40590 | UM   |











|           |      |      |     |     |     |     |      |     |
|-----------|------|------|-----|-----|-----|-----|------|-----|
| AT2G42360 | UM   | UM   | UM  | UM  | UM  | UM  | UM   | UM  |
| AT2G42370 | UM   | mCHH | UM  | UM  | UM  | UM  | mCHH | UM  |
| AT2G42380 | UM   | UM   | UM  | UM  | UM  | UM  | UM   | UM  |
| AT2G42390 | UM   | UM   | UM  | UM  | UM  | UM  | UM   | UM  |
| AT2G42395 | UM   | UM   | UM  | UM  | UM  | UM  | UM   | UM  |
| AT2G42400 | UM   | UM   | UM  | UM  | UM  | UM  | UM   | UM  |
| AT2G42410 | UM   | UM   | UM  | UM  | UM  | UM  | UM   | UM  |
| AT2G42430 | UM   | UM   | UM  | UM  | UM  | UM  | UM   | UM  |
| AT2G42440 | UM   | UM   | UM  | UM  | UM  | UM  | UM   | UM  |
| AT2G42450 | UM   | UM   | UM  | UM  | UM  | UM  | UM   | UM  |
| AT2G42460 | UM   | UM   | UM  | UM  | UM  | UM  | UM   | UM  |
| AT2G42470 | UM   | UM   | UM  | UM  | UM  | UM  | UM   | UM  |
| AT2G42480 | UM   | UM   | UM  | UM  | UM  | UM  | UM   | UM  |
| AT2G42490 | UM   | UM   | UM  | UM  | UM  | UM  | UM   | UM  |
| AT2G42500 | UM   | gbM  | UM  | UM  | UM  | UM  | UM   | UM  |
| AT2G42510 | UM   | UM   | UM  | UM  | UM  | UM  | UM   | UM  |
| AT2G42520 | gbM  | gbM  | gbM | gbM | gbM | gbM | gbM  | gbM |
| AT2G42530 | UM   | UM   | UM  | UM  | UM  | UM  | UM   | UM  |
| AT2G42540 | UM   | UM   | UM  | UM  | UM  | UM  | UM   | UM  |
| AT2G42550 | UM   | UM   | UM  | UM  | UM  | UM  | UM   | UM  |
| AT2G42560 | mCHH | UM   | UM  | UM  | UM  | UM  | mCHH | UM  |
| AT2G42570 | UM   | UM   | UM  | UM  | UM  | UM  | UM   | UM  |
| AT2G42580 | UM   | UM   | UM  | UM  | UM  | UM  | UM   | UM  |
| AT2G42590 | UM   | UM   | UM  | UM  | UM  | UM  | UM   | UM  |
| AT2G42600 | gbM  | gbM  | gbM | gbM | gbM | gbM | gbM  | gbM |
| AT2G42610 | UM   | UM   | UM  | UM  | UM  | UM  | UM   | UM  |
| AT2G42620 | UM   | UM   | UM  | UM  | UM  | UM  | UM   | UM  |
| AT2G42640 | UM   | UM   | UM  | gbM | UM  | UM  | UM   | UM  |
| AT2G42650 | UM   | UM   | UM  | UM  | UM  | UM  | UM   | UM  |
| AT2G42660 | UM   | UM   | UM  | UM  | UM  | UM  | UM   | UM  |
| AT2G42670 | UM   | UM   | UM  | UM  | UM  | UM  | UM   | UM  |
| AT2G42680 | UM   | UM   | UM  | UM  | UM  | UM  | UM   | UM  |
| AT2G42690 | UM   | UM   | UM  | UM  | UM  | UM  | UM   | UM  |
| AT2G42700 | gbM  | mCHH | gbM | gbM | gbM | gbM | gbM  | gbM |
| AT2G42710 | UM   | UM   | UM  | UM  | UM  | UM  | UM   | UM  |
| AT2G42720 | UM   | UM   | UM  | UM  | UM  | UM  | UM   | UM  |
| AT2G42730 | UM   | UM   | UM  | UM  | UM  | UM  | mCHH | UM  |
| AT2G42740 | UM   | UM   | UM  | UM  | UM  | UM  | UM   | UM  |
| AT2G42750 | UM   | UM   | UM  | UM  | UM  | UM  | UM   | UM  |
| AT2G42760 | UM   | UM   | UM  | UM  | UM  | UM  | mCHH | UM  |
| AT2G42770 | UM   | UM   | UM  | UM  | UM  | UM  | UM   | UM  |
| AT2G42780 | UM   | UM   | UM  | UM  | UM  | UM  | UM   | UM  |
| AT2G42790 | UM   | UM   | UM  | UM  | UM  | UM  | UM   | UM  |
| AT2G42800 | UM   | UM   | UM  | UM  | UM  | UM  | UM   | UM  |
| AT2G42810 | UM   | UM   | UM  | UM  | UM  | UM  | UM   | UM  |
| AT2G42820 | UM   | UM   | UM  | UM  | UM  | UM  | UM   | UM  |
| AT2G42830 | UM   | UM   | UM  | UM  | UM  | UM  | UM   | UM  |
| AT2G42840 | UM   | mCHG | UM  | UM  | UM  | UM  | mCHH | UM  |

|           |     |      |     |     |     |     |      |     |
|-----------|-----|------|-----|-----|-----|-----|------|-----|
| AT2G42850 | UM  | UM   | UM  | UM  | UM  | UM  | UM   | UM  |
| AT2G42860 | UM  | UM   | UM  | UM  | UM  | UM  | UM   | UM  |
| AT2G42870 | UM  | UM   | UM  | UM  | UM  | UM  | UM   | UM  |
| AT2G42880 | UM  | UM   | UM  | UM  | UM  | UM  | UM   | UM  |
| AT2G42885 | UM  | UM   | UM  | UM  | UM  | UM  | UM   | UM  |
| AT2G42890 | UM  | UM   | UM  | UM  | UM  | UM  | UM   | UM  |
| AT2G42900 | UM  | UM   | UM  | UM  | UM  | UM  | UM   | UM  |
| AT2G42910 | UM  | UM   | UM  | UM  | UM  | UM  | UM   | UM  |
| AT2G42920 | UM  | UM   | UM  | UM  | UM  | UM  | UM   | UM  |
| AT2G42930 | UM  | UM   | UM  | UM  | UM  | UM  | UM   | UM  |
| AT2G42940 | gbM | gbM  | gbM | gbM | gbM | UM  | gbM  | gbM |
| AT2G42950 | UM  | UM   | UM  | UM  | UM  | UM  | mCHH | UM  |
| AT2G42955 | UM  | UM   | UM  | UM  | UM  | UM  | UM   | UM  |
| AT2G42960 | UM  | UM   | UM  | UM  | UM  | UM  | UM   | UM  |
| AT2G42975 | UM  | UM   | UM  | UM  | UM  | UM  | UM   | UM  |
| AT2G42980 | gbM | UM   | UM  | UM  | UM  | UM  | UM   | UM  |
| AT2G42990 | UM  | UM   | UM  | UM  | UM  | UM  | UM   | UM  |
| AT2G43000 | UM  | UM   | UM  | UM  | UM  | UM  | UM   | UM  |
| AT2G43010 | UM  | UM   | UM  | UM  | UM  | UM  | UM   | UM  |
| AT2G43018 | UM  | UM   | UM  | UM  | UM  | UM  | UM   | UM  |
| AT2G43020 | UM  | gbM  | gbM | UM  | gbM | gbM | gbM  | UM  |
| AT2G43030 | UM  | UM   | UM  | UM  | UM  | UM  | UM   | UM  |
| AT2G43040 | gbM | gbM  | gbM | gbM | gbM | gbM | mCHH | gbM |
| AT2G43050 | UM  | UM   | UM  | UM  | UM  | UM  | UM   | UM  |
| AT2G43060 | UM  | UM   | UM  | UM  | UM  | UM  | UM   | UM  |
| AT2G43070 | UM  | UM   | UM  | UM  | UM  | UM  | UM   | UM  |
| AT2G43080 | UM  | UM   | UM  | UM  | UM  | UM  | UM   | UM  |
| AT2G43090 | UM  | UM   | UM  | UM  | UM  | UM  | UM   | UM  |
| AT2G43100 | UM  | UM   | UM  | UM  | UM  | UM  | UM   | UM  |
| AT2G43110 | UM  | UM   | UM  | UM  | UM  | UM  | UM   | UM  |
| AT2G43120 | UM  | UM   | UM  | UM  | UM  | UM  | UM   | UM  |
| AT2G43130 | UM  | UM   | UM  | UM  | UM  | UM  | UM   | UM  |
| AT2G43140 | UM  | UM   | UM  | UM  | UM  | UM  | UM   | UM  |
| AT2G43150 | UM  | UM   | UM  | UM  | UM  | UM  | UM   | UM  |
| AT2G43160 | gbM | gbM  | gbM | gbM | gbM | gbM | gbM  | gbM |
| AT2G43180 | UM  | UM   | UM  | UM  | UM  | UM  | UM   | UM  |
| AT2G43190 | UM  | UM   | UM  | UM  | UM  | UM  | UM   | UM  |
| AT2G43200 | UM  | UM   | UM  | UM  | UM  | UM  | UM   | UM  |
| AT2G43210 | UM  | mCHH | UM  | UM  | UM  | UM  | UM   | UM  |
| AT2G43220 | UM  | UM   | UM  | UM  | UM  | UM  | UM   | UM  |
| AT2G43230 | UM  | UM   | UM  | UM  | UM  | UM  | UM   | UM  |
| AT2G43235 | UM  | UM   | UM  | UM  | UM  | UM  | UM   | UM  |
| AT2G43240 | UM  | UM   | UM  | UM  | UM  | UM  | UM   | UM  |
| AT2G43250 | UM  | gbM  | gbM | UM  | UM  | UM  | UM   | UM  |
| AT2G43255 | UM  | UM   | UM  | UM  | UM  | UM  | UM   | UM  |
| AT2G43260 | UM  | UM   | UM  | UM  | UM  | UM  | UM   | UM  |
| AT2G43261 | UM  | UM   | UM  | UM  | UM  | UM  | UM   | UM  |
| AT2G43270 | UM  | UM   | UM  | UM  | UM  | UM  | UM   | UM  |

|           |     |     |     |     |     |     |      |     |
|-----------|-----|-----|-----|-----|-----|-----|------|-----|
| AT2G43280 | UM   | UM  |
| AT2G43290 | UM   | UM  |
| AT2G43310 | UM   | UM  |
| AT2G43320 | UM   | UM  |
| AT2G43330 | UM  | gbM | UM  | UM  | gbM | UM  | UM   | UM  |
| AT2G43340 | UM   | UM  |
| AT2G43350 | UM   | UM  |
| AT2G43360 | UM   | UM  |
| AT2G43370 | UM   | UM  |
| AT2G43371 | UM   | UM  |
| AT2G43386 | UM   | UM  |
| AT2G43390 | UM   | UM  |
| AT2G43400 | UM   | UM  |
| AT2G43410 | gbM | gbM | gbM | UM  | UM  | UM  | gbM  | UM  |
| AT2G43420 | UM  | UM  | UM  | UM  | UM  | UM  | mCHH | UM  |
| AT2G43430 | UM   | UM  |
| AT2G43440 | UM   | UM  |
| AT2G43445 | UM   | UM  |
| AT2G43450 | UM   | UM  |
| AT2G43460 | UM   | UM  |
| AT2G43465 | UM   | UM  |
| AT2G43470 | UM   | UM  |
| AT2G43480 | UM   | UM  |
| AT2G43490 | gbM | gbM | gbM | gbM | gbM | gbM | mCHH | gbM |
| AT2G43500 | UM   | UM  |
| AT2G43510 | UM   | UM  |
| AT2G43520 | UM   | UM  |
| AT2G43530 | UM   | UM  |
| AT2G43535 | UM   | UM  |
| AT2G43540 | UM   | UM  |
| AT2G43550 | UM   | UM  |
| AT2G43560 | UM   | UM  |
| AT2G43570 | UM   | UM  |
| AT2G43580 | UM   | UM  |
| AT2G43590 | UM   | UM  |
| AT2G43600 | UM   | UM  |
| AT2G43610 | UM   | UM  |
| AT2G43620 | UM   | UM  |
| AT2G43630 | UM   | UM  |
| AT2G43640 | UM   | UM  |
| AT2G43650 | UM   | UM  |
| AT2G43660 | UM   | UM  |
| AT2G43670 | UM   | UM  |
| AT2G43680 | UM   | UM  |
| AT2G43690 | UM   | UM  |
| AT2G43700 | UM   | UM  |
| AT2G43710 | gbM | gbM | gbM | gbM | UM  | gbM | gbM  | UM  |
| AT2G43720 | UM   | UM  |

|           |      |      |      |     |      |      |      |     |
|-----------|------|------|------|-----|------|------|------|-----|
| AT2G43730 | UM   | UM   | UM   | UM  | UM   | UM   | UM   | UM  |
| AT2G43740 | UM   | UM   | UM   | UM  | UM   | UM   | UM   | UM  |
| AT2G43745 | UM   | UM   | UM   | UM  | UM   | UM   | UM   | UM  |
| AT2G43750 | UM   | UM   | UM   | UM  | UM   | UM   | UM   | UM  |
| AT2G43760 | UM   | UM   | UM   | UM  | UM   | UM   | UM   | UM  |
| AT2G43770 | UM   | UM   | UM   | UM  | UM   | UM   | UM   | UM  |
| AT2G43780 | UM   | UM   | UM   | UM  | UM   | UM   | UM   | UM  |
| AT2G43790 | UM   | UM   | UM   | UM  | UM   | UM   | UM   | UM  |
| AT2G43795 | UM   | UM   | UM   | UM  | UM   | UM   | UM   | UM  |
| AT2G43800 | UM   | UM   | UM   | UM  | UM   | UM   | mCHH | UM  |
| AT2G43810 | UM   | UM   | UM   | UM  | UM   | UM   | UM   | UM  |
| AT2G43820 | UM   | UM   | UM   | UM  | UM   | UM   | UM   | UM  |
| AT2G43840 | UM   | UM   | UM   | UM  | UM   | UM   | mCHH | UM  |
| AT2G43850 | UM   | UM   | UM   | UM  | UM   | UM   | UM   | UM  |
| AT2G43860 | UM   | UM   | UM   | UM  | UM   | UM   | UM   | UM  |
| AT2G43865 | mCHH | mCHH | mCHH | gbM | mCHH | mCHG | mCHH | gbM |
| AT2G43870 | UM   | UM   | UM   | UM  | UM   | UM   | UM   | UM  |
| AT2G43871 | UM   | UM   | UM   | UM  | UM   | UM   | UM   | UM  |
| AT2G43880 | UM   | UM   | UM   | UM  | UM   | UM   | UM   | UM  |
| AT2G43890 | UM   | UM   | UM   | UM  | UM   | UM   | UM   | UM  |
| AT2G43900 | mCHH | mCHH | gbM  | gbM | gbM  | gbM  | mCHH | gbM |
| AT2G43910 | UM   | UM   | UM   | UM  | UM   | UM   | UM   | UM  |
| AT2G43920 | UM   | UM   | UM   | UM  | UM   | UM   | UM   | UM  |
| AT2G43930 | UM   | UM   | UM   | UM  | UM   | UM   | UM   | UM  |
| AT2G43940 | UM   | UM   | UM   | UM  | UM   | UM   | UM   | UM  |
| AT2G43945 | UM   | UM   | UM   | UM  | UM   | UM   | mCHH | UM  |
| AT2G43950 | UM   | UM   | UM   | UM  | UM   | UM   | UM   | UM  |
| AT2G43960 | UM   | UM   | UM   | UM  | UM   | UM   | UM   | UM  |
| AT2G43970 | UM   | UM   | UM   | UM  | UM   | UM   | UM   | UM  |
| AT2G43980 | UM   | UM   | UM   | UM  | UM   | UM   | UM   | UM  |
| AT2G43990 | UM   | UM   | UM   | UM  | UM   | UM   | UM   | UM  |
| AT2G44000 | UM   | UM   | UM   | UM  | UM   | UM   | UM   | UM  |
| AT2G44010 | UM   | UM   | UM   | UM  | UM   | UM   | UM   | UM  |
| AT2G44020 | UM   | UM   | UM   | UM  | UM   | UM   | UM   | UM  |
| AT2G44030 | UM   | UM   | UM   | UM  | UM   | UM   | UM   | UM  |
| AT2G44040 | UM   | UM   | UM   | UM  | UM   | UM   | mCHH | UM  |
| AT2G44050 | UM   | UM   | UM   | UM  | UM   | UM   | UM   | UM  |
| AT2G44060 | UM   | UM   | UM   | UM  | UM   | UM   | UM   | UM  |
| AT2G44065 | UM   | UM   | UM   | UM  | UM   | UM   | UM   | UM  |
| AT2G44070 | UM   | UM   | UM   | UM  | UM   | UM   | UM   | UM  |
| AT2G44080 | UM   | UM   | UM   | UM  | UM   | UM   | UM   | UM  |
| AT2G44090 | gbM  | gbM  | gbM  | gbM | gbM  | gbM  | gbM  | gbM |
| AT2G44100 | UM   | UM   | UM   | UM  | UM   | UM   | mCHH | UM  |
| AT2G44110 | UM   | UM   | UM   | UM  | UM   | UM   | mCHH | UM  |
| AT2G44120 | UM   | UM   | UM   | UM  | UM   | UM   | UM   | UM  |
| AT2G44130 | UM   | UM   | UM   | UM  | UM   | UM   | UM   | UM  |
| AT2G44140 | UM   | UM   | UM   | UM  | UM   | UM   | UM   | UM  |
| AT2G44150 | UM   | UM   | UM   | UM  | UM   | UM   | UM   | UM  |



|           |      |      |      |      |      |      |      |      |
|-----------|------|------|------|------|------|------|------|------|
| AT2G44160 | UM   |
| AT2G44175 | mCHH | mCHH | mCHH | mCHG | mCHH | mCHG | mCHH | mCHG |
| AT2G44180 | UM   |
| AT2G44190 | UM   |
| AT2G44195 | UM   |
| AT2G44198 | UM   |
| AT2G44200 | mCHH | mCHH | UM   | UM   | UM   | UM   | mCHH | UM   |
| AT2G44210 | UM   |
| AT2G44220 | mCHG | mCHH | UM   | UM   | UM   | UM   | mCHH | UM   |
| AT2G44230 | UM   |
| AT2G44240 | UM   |
| AT2G44250 | UM   |
| AT2G44260 | UM   |
| AT2G44270 | UM   |
| AT2G44280 | UM   | UM   | UM   | UM   | UM   | UM   | mCHH | UM   |
| AT2G44290 | UM   |
| AT2G44300 | UM   |
| AT2G44304 | UM   |
| AT2G44310 | UM   |
| AT2G44330 | UM   |
| AT2G44340 | UM   |
| AT2G44350 | UM   |
| AT2G44360 | UM   |
| AT2G44370 | UM   |
| AT2G44380 | UM   |
| AT2G44390 | UM   |
| AT2G44400 | UM   |
| AT2G44410 | UM   |
| AT2G44420 | UM   |
| AT2G44430 | mCHH | mCHG | UM   | UM   | UM   | UM   | mCHH | UM   |
| AT2G44440 | UM   |
| AT2G44450 | UM   | UM   | UM   | UM   | UM   | UM   | mCHH | UM   |
| AT2G44460 | mCHH | mCHH | UM   | UM   | UM   | UM   | UM   | UM   |
| AT2G44470 | mCHH | mCHH | UM   | UM   | UM   | UM   | mCHH | UM   |
| AT2G44480 | UM   |
| AT2G44490 | UM   |
| AT2G44500 | UM   | UM   | UM   | UM   | UM   | UM   | mCHH | UM   |
| AT2G44510 | UM   |
| AT2G44520 | UM   | UM   | UM   | UM   | UM   | UM   | mCHH | UM   |
| AT2G44525 | UM   |
| AT2G44530 | UM   |
| AT2G44540 | mCHH | mCHH | mCHH | UM   | UM   | UM   | mCHH | UM   |
| AT2G44550 | mCHH | mCHH | mCHH | UM   | mCHH | UM   | mCHH | UM   |
| AT2G44560 | mCHH | mCHH | mCHH | UM   | UM   | UM   | mCHH | UM   |
| AT2G44570 | mCHH | mCHH | mCHH | UM   | UM   | UM   | mCHH | UM   |
| AT2G44578 | UM   |
| AT2G44580 | UM   |
| AT2G44581 | UM   |



|           |      |      |     |     |     |     |      |     |
|-----------|------|------|-----|-----|-----|-----|------|-----|
| AT2G45080 | UM   | UM   | UM  | UM  | UM  | UM  | UM   | UM  |
| AT2G45100 | UM   | mCHH | UM  | UM  | UM  | UM  | mCHH | UM  |
| AT2G45110 | UM   | UM   | UM  | UM  | UM  | UM  | UM   | UM  |
| AT2G45120 | UM   | UM   | UM  | UM  | UM  | UM  | UM   | UM  |
| AT2G45126 | UM   | UM   | UM  | UM  | UM  | UM  | UM   | UM  |
| AT2G45130 | UM   | UM   | UM  | UM  | UM  | UM  | UM   | UM  |
| AT2G45135 | UM   | UM   | UM  | UM  | UM  | UM  | UM   | UM  |
| AT2G45140 | UM   | UM   | UM  | UM  | UM  | UM  | UM   | UM  |
| AT2G45150 | UM   | UM   | UM  | UM  | UM  | UM  | UM   | UM  |
| AT2G45160 | UM   | UM   | UM  | UM  | UM  | UM  | UM   | UM  |
| AT2G45161 | UM   | UM   | UM  | UM  | UM  | UM  | UM   | UM  |
| AT2G45170 | UM   | UM   | UM  | UM  | UM  | UM  | UM   | UM  |
| AT2G45180 | UM   | UM   | UM  | UM  | UM  | UM  | UM   | UM  |
| AT2G45190 | UM   | UM   | UM  | UM  | UM  | UM  | UM   | UM  |
| AT2G45200 | UM   | UM   | UM  | UM  | UM  | UM  | UM   | UM  |
| AT2G45210 | UM   | UM   | UM  | UM  | UM  | UM  | UM   | UM  |
| AT2G45220 | UM   | UM   | UM  | UM  | UM  | UM  | UM   | UM  |
| AT2G45240 | UM   | UM   | UM  | UM  | UM  | UM  | UM   | UM  |
| AT2G45250 | UM   | UM   | UM  | UM  | UM  | UM  | UM   | UM  |
| AT2G45260 | UM   | UM   | UM  | UM  | UM  | UM  | UM   | UM  |
| AT2G45270 | UM   | gbM  | gbM | UM  | UM  | UM  | gbM  | UM  |
| AT2G45280 | UM   | UM   | UM  | UM  | UM  | UM  | UM   | UM  |
| AT2G45290 | UM   | UM   | UM  | UM  | UM  | UM  | UM   | UM  |
| AT2G45300 | UM   | UM   | UM  | UM  | UM  | UM  | UM   | UM  |
| AT2G45310 | UM   | UM   | UM  | UM  | UM  | UM  | UM   | UM  |
| AT2G45320 | UM   | UM   | UM  | UM  | UM  | UM  | UM   | UM  |
| AT2G45330 | UM   | UM   | UM  | UM  | UM  | UM  | mCHH | UM  |
| AT2G45340 | UM   | UM   | UM  | UM  | UM  | UM  | mCHH | UM  |
| AT2G45350 | UM   | UM   | UM  | UM  | UM  | UM  | UM   | UM  |
| AT2G45360 | UM   | UM   | UM  | UM  | UM  | UM  | UM   | UM  |
| AT2G45380 | mCHH | mCHH | UM  | UM  | UM  | UM  | mCHH | UM  |
| AT2G45400 | UM   | UM   | UM  | UM  | UM  | UM  | UM   | UM  |
| AT2G45403 | UM   | UM   | UM  | UM  | UM  | UM  | UM   | UM  |
| AT2G45406 | UM   | UM   | UM  | UM  | UM  | UM  | UM   | UM  |
| AT2G45410 | UM   | UM   | UM  | UM  | UM  | UM  | UM   | UM  |
| AT2G45412 | UM   | UM   | UM  | UM  | UM  | UM  | UM   | UM  |
| AT2G45420 | UM   | UM   | UM  | UM  | UM  | UM  | UM   | UM  |
| AT2G45430 | UM   | UM   | UM  | UM  | UM  | UM  | UM   | UM  |
| AT2G45434 | UM   | UM   | UM  | UM  | UM  | UM  | UM   | UM  |
| AT2G45440 | gbM  | gbM  | gbM | gbM | gbM | gbM | gbM  | gbM |
| AT2G45450 | UM   | UM   | UM  | UM  | UM  | UM  | mCHH | UM  |
| AT2G45460 | UM   | UM   | UM  | UM  | UM  | UM  | mCHH | UM  |
| AT2G45470 | UM   | UM   | UM  | UM  | UM  | UM  | UM   | UM  |
| AT2G45480 | gbM  | gbM  | gbM | gbM | UM  | gbM | gbM  | UM  |
| AT2G45490 | UM   | UM   | UM  | UM  | UM  | UM  | UM   | UM  |
| AT2G45500 | UM   | UM   | UM  | UM  | UM  | UM  | UM   | UM  |
| AT2G45510 | UM   | UM   | UM  | UM  | UM  | UM  | UM   | UM  |
| AT2G45520 | UM   | UM   | UM  | UM  | UM  | UM  | UM   | UM  |

|           |     |      |     |     |     |     |      |     |
|-----------|-----|------|-----|-----|-----|-----|------|-----|
| AT2G45530 | UM  | UM   | UM  | UM  | UM  | UM  | UM   | UM  |
| AT2G45540 | gbM | mCHH | gbM | gbM | gbM | gbM | mCHH | gbM |
| AT2G45550 | UM  | UM   | UM  | UM  | UM  | UM  | mCHH | UM  |
| AT2G45560 | UM  | UM   | UM  | UM  | UM  | UM  | UM   | UM  |
| AT2G45570 | UM  | UM   | UM  | UM  | UM  | UM  | UM   | UM  |
| AT2G45580 | UM  | UM   | UM  | UM  | UM  | UM  | UM   | UM  |
| AT2G45590 | UM  | UM   | UM  | UM  | UM  | UM  | UM   | UM  |
| AT2G45600 | UM  | UM   | UM  | UM  | UM  | UM  | UM   | UM  |
| AT2G45610 | UM  | UM   | UM  | UM  | UM  | UM  | UM   | UM  |
| AT2G45620 | UM  | UM   | UM  | UM  | UM  | UM  | UM   | UM  |
| AT2G45630 | UM  | UM   | UM  | UM  | UM  | UM  | UM   | UM  |
| AT2G45640 | UM  | UM   | UM  | UM  | UM  | UM  | UM   | UM  |
| AT2G45650 | UM  | UM   | UM  | UM  | UM  | UM  | mCHH | UM  |
| AT2G45660 | UM  | UM   | UM  | UM  | UM  | UM  | UM   | UM  |
| AT2G45670 | UM  | UM   | UM  | UM  | UM  | UM  | UM   | UM  |
| AT2G45680 | UM  | UM   | UM  | UM  | UM  | UM  | UM   | UM  |
| AT2G45690 | gbM | gbM  | gbM | UM  | gbM | gbM | gbM  | gbM |
| AT2G45695 | UM  | UM   | UM  | UM  | UM  | UM  | UM   | UM  |
| AT2G45700 | UM  | UM   | UM  | UM  | UM  | UM  | UM   | UM  |
| AT2G45710 | UM  | UM   | UM  | UM  | UM  | UM  | UM   | UM  |
| AT2G45720 | UM  | UM   | UM  | UM  | UM  | UM  | UM   | UM  |
| AT2G45730 | UM  | UM   | UM  | UM  | UM  | UM  | mCHH | UM  |
| AT2G45740 | UM  | UM   | UM  | UM  | UM  | UM  | UM   | UM  |
| AT2G45750 | UM  | UM   | UM  | UM  | UM  | UM  | UM   | UM  |
| AT2G45760 | UM  | UM   | UM  | UM  | UM  | UM  | UM   | UM  |
| AT2G45770 | UM  | UM   | UM  | UM  | UM  | UM  | UM   | UM  |
| AT2G45790 | UM  | UM   | UM  | UM  | UM  | UM  | UM   | UM  |
| AT2G45800 | UM  | UM   | UM  | UM  | UM  | UM  | UM   | UM  |
| AT2G45810 | UM  | UM   | UM  | UM  | UM  | UM  | UM   | UM  |
| AT2G45820 | UM  | UM   | UM  | UM  | UM  | UM  | UM   | UM  |
| AT2G45830 | UM  | UM   | UM  | UM  | UM  | UM  | UM   | UM  |
| AT2G45840 | UM  | UM   | UM  | UM  | UM  | UM  | UM   | UM  |
| AT2G45850 | UM  | UM   | UM  | UM  | UM  | UM  | UM   | UM  |
| AT2G45860 | UM  | UM   | UM  | UM  | UM  | UM  | UM   | UM  |
| AT2G45870 | UM  | UM   | UM  | UM  | UM  | UM  | UM   | UM  |
| AT2G45880 | UM  | UM   | UM  | UM  | UM  | UM  | UM   | UM  |
| AT2G45890 | UM  | UM   | UM  | UM  | UM  | UM  | UM   | UM  |
| AT2G45900 | UM  | UM   | UM  | UM  | UM  | UM  | UM   | UM  |
| AT2G45910 | gbM | gbM  | gbM | gbM | gbM | gbM | gbM  | gbM |
| AT2G45920 | UM  | UM   | UM  | UM  | UM  | UM  | UM   | UM  |
| AT2G45930 | UM  | UM   | UM  | UM  | UM  | UM  | UM   | UM  |
| AT2G45940 | UM  | UM   | UM  | UM  | UM  | UM  | UM   | UM  |
| AT2G45950 | UM  | gbM  | UM  | UM  | gbM | UM  | UM   | UM  |
| AT2G45960 | UM  | UM   | UM  | UM  | UM  | UM  | UM   | UM  |
| AT2G45970 | UM  | UM   | UM  | UM  | UM  | UM  | UM   | UM  |
| AT2G45980 | UM  | UM   | UM  | UM  | UM  | UM  | UM   | UM  |
| AT2G45990 | UM  | UM   | UM  | UM  | UM  | UM  | UM   | UM  |
| AT2G46000 | UM  | UM   | UM  | UM  | UM  | UM  | UM   | UM  |

|           |      |      |      |      |      |      |      |      |
|-----------|------|------|------|------|------|------|------|------|
| AT2G46020 | gbM  | mCHH | gbM  | gbM  | gbM  | gbM  | mCHH | gbM  |
| AT2G46030 | UM   |
| AT2G46040 | UM   |
| AT2G46050 | UM   |
| AT2G46060 | gbM  | mCHH | gbM  | gbM  | gbM  | gbM  | mCHH | UM   |
| AT2G46070 | gbM  |
| AT2G46080 | UM   |
| AT2G46090 | UM   |
| AT2G46100 | UM   |
| AT2G46110 | UM   |
| AT2G46130 | mCHH | UM   | mCHH | UM   | mCHH | UM   | mCHH | UM   |
| AT2G46140 | UM   |
| AT2G46150 | UM   |
| AT2G46160 | UM   |
| AT2G46170 | UM   |
| AT2G46180 | gbM  | gbM  | gbM  | UM   | UM   | UM   | mCHH | UM   |
| AT2G46190 | mCHH |
| AT2G46200 | UM   |
| AT2G46210 | UM   |
| AT2G46220 | UM   |
| AT2G46225 | UM   |
| AT2G46230 | UM   |
| AT2G46240 | mCHG | UM   | UM   | UM   | UM   | UM   | mCHH | UM   |
| AT2G46250 | mCHH | UM   |
| AT2G46260 | UM   |
| AT2G46270 | UM   |
| AT2G46280 | UM   |
| AT2G46290 | UM   |
| AT2G46300 | UM   |
| AT2G46308 | UM   |
| AT2G46310 | UM   |
| AT2G46320 | UM   |
| AT2G46330 | UM   |
| AT2G46340 | gbM  | gbM  | gbM  | UM   | gbM  | gbM  | gbM  | UM   |
| AT2G46360 | UM   |
| AT2G46370 | UM   |
| AT2G46375 | UM   |
| AT2G46380 | UM   |
| AT2G46390 | UM   |
| AT2G46400 | UM   |
| AT2G46410 | UM   |
| AT2G46420 | UM   |
| AT2G46430 | UM   |
| AT2G46440 | UM   |
| AT2G46450 | UM   |
| AT2G46455 | UM   |
| AT2G46460 | mCHH |
| AT2G46470 | UM   |

|           |     |      |     |     |     |     |      |     |
|-----------|-----|------|-----|-----|-----|-----|------|-----|
| AT2G46480 | UM  | UM   | UM  | UM  | UM  | UM  | UM   | UM  |
| AT2G46490 | UM  | UM   | UM  | UM  | UM  | UM  | UM   | UM  |
| AT2G46493 | UM  | UM   | UM  | UM  | UM  | UM  | UM   | UM  |
| AT2G46494 | UM  | UM   | UM  | UM  | UM  | UM  | UM   | UM  |
| AT2G46495 | UM  | UM   | UM  | UM  | UM  | UM  | UM   | UM  |
| AT2G46500 | gbM | gbM  | UM  | UM  | UM  | UM  | mCHH | UM  |
| AT2G46505 | UM  | UM   | UM  | UM  | UM  | UM  | UM   | UM  |
| AT2G46510 | UM  | UM   | UM  | UM  | UM  | UM  | UM   | UM  |
| AT2G46520 | UM  | UM   | UM  | UM  | UM  | UM  | UM   | UM  |
| AT2G46530 | gbM | gbM  | UM  | UM  | gbM | gbM | UM   | gbM |
| AT2G46535 | UM  | UM   | UM  | UM  | UM  | UM  | UM   | UM  |
| AT2G46540 | UM  | UM   | UM  | UM  | UM  | UM  | UM   | UM  |
| AT2G46550 | gbM | gbM  | gbM | gbM | gbM | gbM | gbM  | gbM |
| AT2G46560 | gbM | mCHH | gbM | gbM | gbM | gbM | mCHH | gbM |
| AT2G46567 | UM  | UM   | UM  | UM  | UM  | UM  | UM   | UM  |
| AT2G46570 | gbM | gbM  | gbM | UM  | UM  | UM  | UM   | gbM |
| AT2G46580 | UM  | UM   | UM  | UM  | UM  | UM  | UM   | UM  |
| AT2G46590 | UM  | UM   | UM  | UM  | UM  | UM  | UM   | UM  |
| AT2G46600 | UM  | UM   | UM  | UM  | UM  | UM  | UM   | UM  |
| AT2G46610 | UM  | UM   | UM  | UM  | UM  | UM  | UM   | UM  |
| AT2G46620 | UM  | UM   | UM  | UM  | UM  | UM  | UM   | UM  |
| AT2G46630 | UM  | UM   | UM  | UM  | UM  | UM  | UM   | UM  |
| AT2G46640 | UM  | UM   | UM  | UM  | UM  | UM  | UM   | UM  |
| AT2G46650 | UM  | UM   | UM  | UM  | UM  | UM  | UM   | UM  |
| AT2G46660 | UM  | UM   | UM  | UM  | UM  | UM  | UM   | UM  |
| AT2G46662 | UM  | UM   | UM  | UM  | UM  | UM  | UM   | UM  |
| AT2G46670 | UM  | UM   | UM  | UM  | UM  | UM  | UM   | UM  |
| AT2G46680 | UM  | UM   | UM  | UM  | UM  | UM  | UM   | UM  |
| AT2G46690 | UM  | UM   | UM  | UM  | UM  | UM  | UM   | UM  |
| AT2G46700 | UM  | UM   | UM  | UM  | UM  | UM  | UM   | UM  |
| AT2G46710 | UM  | UM   | UM  | UM  | UM  | UM  | UM   | UM  |
| AT2G46720 | UM  | UM   | UM  | UM  | UM  | UM  | UM   | UM  |
| AT2G46735 | UM  | UM   | UM  | UM  | UM  | UM  | UM   | UM  |
| AT2G46740 | UM  | UM   | UM  | UM  | UM  | UM  | mCHH | UM  |
| AT2G46750 | UM  | UM   | UM  | UM  | UM  | UM  | UM   | UM  |
| AT2G46760 | UM  | UM   | UM  | UM  | UM  | UM  | mCHH | UM  |
| AT2G46770 | UM  | UM   | UM  | UM  | UM  | UM  | UM   | UM  |
| AT2G46780 | UM  | UM   | UM  | UM  | UM  | UM  | UM   | UM  |
| AT2G46787 | UM  | UM   | UM  | UM  | UM  | UM  | UM   | UM  |
| AT2G46790 | UM  | UM   | UM  | UM  | UM  | UM  | UM   | UM  |
| AT2G46800 | UM  | UM   | UM  | UM  | UM  | UM  | UM   | UM  |
| AT2G46810 | UM  | UM   | UM  | UM  | UM  | UM  | UM   | UM  |
| AT2G46820 | UM  | UM   | UM  | UM  | UM  | UM  | UM   | UM  |
| AT2G46830 | UM  | UM   | UM  | UM  | UM  | UM  | UM   | UM  |
| AT2G46840 | UM  | UM   | UM  | UM  | UM  | UM  | UM   | UM  |
| AT2G46850 | UM  | UM   | UM  | UM  | UM  | UM  | mCHH | UM  |
| AT2G46860 | UM  | UM   | UM  | UM  | UM  | UM  | UM   | UM  |
| AT2G46870 | UM  | UM   | UM  | UM  | UM  | UM  | UM   | UM  |

|           |     |      |     |     |     |     |      |     |
|-----------|-----|------|-----|-----|-----|-----|------|-----|
| AT2G46880 | UM  | UM   | UM  | UM  | UM  | UM  | UM   | UM  |
| AT2G46890 | UM  | UM   | UM  | UM  | UM  | UM  | UM   | UM  |
| AT2G46900 | UM  | UM   | gbM | UM  | UM  | UM  | mCHH | UM  |
| AT2G46910 | UM  | UM   | UM  | UM  | UM  | UM  | UM   | UM  |
| AT2G46915 | UM  | UM   | UM  | UM  | UM  | UM  | UM   | UM  |
| AT2G46920 | gbM | gbM  | gbM | UM  | gbM | gbM | gbM  | UM  |
| AT2G46930 | UM  | UM   | UM  | UM  | UM  | UM  | UM   | UM  |
| AT2G46940 | UM  | UM   | UM  | UM  | UM  | UM  | UM   | UM  |
| AT2G46950 | UM  | UM   | UM  | UM  | UM  | UM  | UM   | UM  |
| AT2G46960 | UM  | UM   | UM  | UM  | UM  | UM  | UM   | UM  |
| AT2G46970 | UM  | UM   | UM  | UM  | UM  | UM  | UM   | UM  |
| AT2G46980 | UM  | UM   | UM  | UM  | UM  | UM  | UM   | UM  |
| AT2G46990 | UM  | UM   | UM  | UM  | UM  | UM  | UM   | UM  |
| AT2G46995 | UM  | UM   | UM  | UM  | UM  | UM  | UM   | UM  |
| AT2G47000 | UM  | UM   | UM  | UM  | UM  | UM  | mCHH | UM  |
| AT2G47010 | UM  | UM   | UM  | UM  | UM  | UM  | UM   | UM  |
| AT2G47020 | UM  | UM   | UM  | UM  | UM  | UM  | mCHH | UM  |
| AT2G47030 | UM  | UM   | UM  | UM  | UM  | UM  | UM   | UM  |
| AT2G47040 | UM  | UM   | UM  | UM  | UM  | UM  | UM   | UM  |
| AT2G47050 | UM  | UM   | UM  | UM  | UM  | UM  | UM   | UM  |
| AT2G47060 | UM  | UM   | UM  | UM  | UM  | UM  | mCHH | UM  |
| AT2G47070 | UM  | UM   | UM  | UM  | UM  | UM  | UM   | UM  |
| AT2G47090 | UM  | mCHH | UM  | UM  | UM  | UM  | UM   | UM  |
| AT2G47110 | UM  | UM   | UM  | UM  | UM  | UM  | UM   | UM  |
| AT2G47115 | UM  | UM   | UM  | UM  | UM  | UM  | UM   | UM  |
| AT2G47120 | UM  | UM   | UM  | UM  | UM  | UM  | UM   | UM  |
| AT2G47130 | UM  | UM   | UM  | UM  | UM  | UM  | UM   | UM  |
| AT2G47140 | UM  | UM   | UM  | UM  | UM  | UM  | UM   | UM  |
| AT2G47150 | UM  | UM   | UM  | UM  | UM  | UM  | UM   | UM  |
| AT2G47160 | UM  | UM   | UM  | UM  | UM  | UM  | UM   | UM  |
| AT2G47170 | UM  | UM   | UM  | UM  | UM  | UM  | UM   | UM  |
| AT2G47180 | UM  | UM   | UM  | UM  | UM  | UM  | UM   | UM  |
| AT2G47190 | UM  | UM   | UM  | UM  | UM  | UM  | UM   | UM  |
| AT2G47200 | UM  | UM   | UM  | UM  | UM  | UM  | UM   | UM  |
| AT2G47210 | gbM | gbM  | gbM | gbM | gbM | gbM | gbM  | UM  |
| AT2G47220 | UM  | gbM  | UM  | UM  | UM  | UM  | UM   | UM  |
| AT2G47230 | UM  | UM   | UM  | UM  | UM  | UM  | UM   | UM  |
| AT2G47240 | UM  | UM   | UM  | UM  | UM  | UM  | UM   | UM  |
| AT2G47250 | UM  | UM   | UM  | UM  | UM  | UM  | UM   | UM  |
| AT2G47260 | UM  | UM   | UM  | UM  | UM  | UM  | UM   | UM  |
| AT2G47270 | UM  | UM   | UM  | UM  | UM  | UM  | UM   | UM  |
| AT2G47280 | UM  | UM   | UM  | UM  | UM  | UM  | UM   | UM  |
| AT2G47300 | UM  | gbM  | UM  | UM  | UM  | UM  | mCHH | UM  |
| AT2G47310 | UM  | UM   | UM  | UM  | UM  | UM  | UM   | UM  |
| AT2G47320 | UM  | UM   | UM  | UM  | UM  | UM  | UM   | UM  |
| AT2G47330 | UM  | UM   | UM  | UM  | UM  | UM  | UM   | UM  |
| AT2G47340 | UM  | UM   | UM  | UM  | UM  | UM  | UM   | UM  |
| AT2G47350 | gbM | gbM  | gbM | UM  | UM  | UM  | gbM  | gbM |

|           |     |      |     |     |     |     |      |     |
|-----------|-----|------|-----|-----|-----|-----|------|-----|
| AT2G47360 | UM  | UM   | UM  | UM  | UM  | UM  | UM   | UM  |
| AT2G47370 | UM  | UM   | UM  | UM  | UM  | UM  | mCHH | UM  |
| AT2G47380 | UM  | UM   | UM  | UM  | UM  | UM  | UM   | UM  |
| AT2G47390 | gbM | gbM  | gbM | gbM | gbM | gbM | gbM  | gbM |
| AT2G47400 | UM  | UM   | UM  | UM  | UM  | UM  | UM   | UM  |
| AT2G47410 | gbM | gbM  | gbM | gbM | gbM | gbM | mCHH | gbM |
| AT2G47420 | UM  | UM   | UM  | UM  | UM  | UM  | UM   | UM  |
| AT2G47430 | UM  | UM   | UM  | UM  | UM  | UM  | UM   | UM  |
| AT2G47440 | UM  | UM   | UM  | UM  | UM  | UM  | UM   | UM  |
| AT2G47450 | UM  | UM   | UM  | UM  | UM  | UM  | UM   | UM  |
| AT2G47460 | UM  | UM   | UM  | UM  | UM  | UM  | UM   | UM  |
| AT2G47470 | UM  | UM   | UM  | UM  | UM  | UM  | UM   | UM  |
| AT2G47480 | UM  | UM   | UM  | UM  | UM  | UM  | UM   | UM  |
| AT2G47485 | UM  | UM   | UM  | UM  | UM  | UM  | UM   | UM  |
| AT2G47490 | UM  | UM   | UM  | UM  | UM  | UM  | UM   | UM  |
| AT2G47500 | UM  | UM   | UM  | UM  | UM  | UM  | UM   | UM  |
| AT2G47510 | UM  | mCHH | UM  | UM  | UM  | UM  | UM   | UM  |
| AT2G47520 | UM  | UM   | UM  | UM  | UM  | UM  | UM   | UM  |
| AT2G47530 | UM  | UM   | UM  | UM  | UM  | UM  | UM   | UM  |
| AT2G47540 | UM  | UM   | UM  | UM  | UM  | UM  | UM   | UM  |
| AT2G47550 | UM  | UM   | UM  | UM  | UM  | UM  | UM   | UM  |
| AT2G47560 | UM  | UM   | UM  | UM  | UM  | UM  | UM   | UM  |
| AT2G47570 | UM  | UM   | UM  | UM  | UM  | UM  | UM   | UM  |
| AT2G47580 | UM  | UM   | UM  | UM  | UM  | UM  | UM   | UM  |
| AT2G47590 | UM  | UM   | UM  | UM  | UM  | UM  | mCHH | UM  |
| AT2G47600 | UM  | UM   | UM  | UM  | UM  | UM  | mCHH | UM  |
| AT2G47610 | UM  | UM   | UM  | UM  | UM  | UM  | UM   | UM  |
| AT2G47620 | UM  | mCHG | UM  | UM  | UM  | UM  | UM   | UM  |
| AT2G47630 | UM  | UM   | UM  | UM  | UM  | UM  | UM   | UM  |
| AT2G47640 | UM  | UM   | UM  | UM  | UM  | UM  | UM   | UM  |
| AT2G47650 | UM  | UM   | UM  | UM  | UM  | UM  | UM   | UM  |
| AT2G47660 | UM  | UM   | UM  | UM  | UM  | UM  | UM   | UM  |
| AT2G47670 | UM  | UM   | UM  | UM  | UM  | UM  | UM   | UM  |
| AT2G47680 | UM  | UM   | UM  | UM  | UM  | UM  | UM   | UM  |
| AT2G47690 | UM  | UM   | UM  | UM  | UM  | UM  | UM   | UM  |
| AT2G47700 | UM  | UM   | UM  | UM  | UM  | UM  | UM   | UM  |
| AT2G47710 | UM  | UM   | UM  | UM  | UM  | UM  | UM   | UM  |
| AT2G47720 | UM  | UM   | UM  | UM  | UM  | UM  | UM   | UM  |
| AT2G47730 | UM  | UM   | UM  | UM  | UM  | UM  | UM   | UM  |
| AT2G47750 | UM  | UM   | UM  | UM  | UM  | UM  | UM   | UM  |
| AT2G47760 | UM  | UM   | UM  | UM  | UM  | UM  | UM   | UM  |
| AT2G47770 | UM  | UM   | UM  | UM  | UM  | UM  | UM   | UM  |
| AT2G47780 | UM  | UM   | UM  | UM  | UM  | UM  | UM   | UM  |
| AT2G47790 | UM  | UM   | UM  | UM  | UM  | UM  | UM   | UM  |
| AT2G47800 | UM  | UM   | UM  | UM  | UM  | UM  | UM   | UM  |
| AT2G47810 | UM  | UM   | UM  | UM  | UM  | UM  | UM   | UM  |
| AT2G47820 | UM  | UM   | UM  | UM  | UM  | UM  | UM   | UM  |
| AT2G47830 | UM  | UM   | UM  | UM  | UM  | UM  | UM   | UM  |





|           |      |      |      |      |      |      |      |      |
|-----------|------|------|------|------|------|------|------|------|
| AT3G01140 | UM   |
| AT3G01150 | UM   |
| AT3G01160 | mCHH | mCHH | mCHH | UM   | UM   | UM   | mCHH | UM   |
| AT3G01170 | UM   |
| AT3G01175 | UM   | mCHH | UM   | UM   | UM   | UM   | mCHH | UM   |
| AT3G01180 | UM   |
| AT3G01185 | UM   |
| AT3G01190 | UM   |
| AT3G01200 | UM   |
| AT3G01210 | UM   |
| AT3G01220 | UM   |
| AT3G01230 | UM   |
| AT3G01240 | UM   |
| AT3G01250 | UM   |
| AT3G01260 | UM   |
| AT3G01270 | UM   |
| AT3G01280 | UM   | gbM  | UM   | UM   | UM   | UM   | mCHH | UM   |
| AT3G01290 | UM   |
| AT3G01300 | UM   |
| AT3G01310 | gbM  | gbM  | gbM  | gbM  | gbM  | gbM  | mCHH | gbM  |
| AT3G01311 | UM   |
| AT3G01319 | UM   |
| AT3G01320 | gbM  | mCHH | gbM  | gbM  | gbM  | gbM  | mCHH | gbM  |
| AT3G01322 | UM   |
| AT3G01323 | UM   |
| AT3G01324 | UM   |
| AT3G01325 | UM   |
| AT3G01326 | UM   |
| AT3G01327 | UM   |
| AT3G01328 | UM   |
| AT3G01329 | UM   |
| AT3G01330 | UM   |
| AT3G01331 | UM   |
| AT3G01340 | gbM  | gbM  | UM   | UM   | gbM  | gbM  | gbM  | gbM  |
| AT3G01345 | UM   | gbM  | UM   | mCHH | mCHH | mCHH | gbM  | mCHH |
| AT3G01350 | gbM  |
| AT3G01360 | UM   |
| AT3G01370 | UM   | mCHH | UM   | UM   | UM   | UM   | UM   | UM   |
| AT3G01380 | UM   |
| AT3G01390 | UM   |
| AT3G01400 | UM   |
| AT3G01410 | UM   |
| AT3G01420 | UM   |
| AT3G01430 | UM   |
| AT3G01435 | UM   |
| AT3G01440 | UM   |
| AT3G01450 | UM   |
| AT3G01460 | gbM  | mCHH | gbM  | gbM  | gbM  | gbM  | mCHH | gbM  |

|           |     |     |     |     |     |     |      |     |
|-----------|-----|-----|-----|-----|-----|-----|------|-----|
| AT3G01470 | UM   | UM  |
| AT3G01472 | UM   | UM  |
| AT3G01480 | UM   | UM  |
| AT3G01490 | UM   | UM  |
| AT3G01500 | UM   | UM  |
| AT3G01510 | UM  | UM  | UM  | UM  | UM  | UM  | mCHH | UM  |
| AT3G01513 | UM   | UM  |
| AT3G01516 | UM   | UM  |
| AT3G01520 | UM   | UM  |
| AT3G01530 | UM   | UM  |
| AT3G01540 | gbM | gbM | gbM | gbM | UM  | gbM | gbM  | gbM |
| AT3G01550 | UM   | UM  |
| AT3G01560 | UM   | UM  |
| AT3G01570 | UM   | UM  |
| AT3G01572 | UM   | UM  |
| AT3G01580 | UM   | UM  |
| AT3G01590 | UM   | UM  |
| AT3G01600 | UM   | UM  |
| AT3G01610 | UM  | gbM | UM  | UM  | UM  | UM  | UM   | UM  |
| AT3G01620 | gbM | gbM | gbM | gbM | gbM | gbM | mCHH | gbM |
| AT3G01630 | UM   | UM  |
| AT3G01640 | UM   | UM  |
| AT3G01650 | UM  | gbM | UM  | UM  | UM  | UM  | gbM  | UM  |
| AT3G01660 | UM   | UM  |
| AT3G01670 | UM   | UM  |
| AT3G01680 | UM   | UM  |
| AT3G01690 | UM   | UM  |
| AT3G01700 | UM   | UM  |
| AT3G01710 | UM   | UM  |
| AT3G01720 | gbM | gbM | UM  | UM  | UM  | UM  | gbM  | UM  |
| AT3G01730 | UM   | UM  |
| AT3G01740 | UM   | UM  |
| AT3G01750 | UM   | UM  |
| AT3G01760 | UM   | UM  |
| AT3G01770 | UM   | UM  |
| AT3G01780 | UM   | UM  |
| AT3G01790 | UM   | UM  |
| AT3G01800 | UM   | UM  |
| AT3G01810 | gbM  | gbM |
| AT3G01820 | UM   | UM  |
| AT3G01830 | UM   | UM  |
| AT3G01840 | UM   | UM  |
| AT3G01850 | UM   | UM  |
| AT3G01860 | UM   | UM  |
| AT3G01870 | UM   | UM  |
| AT3G01880 | UM   | UM  |
| AT3G01890 | UM   | UM  |
| AT3G01900 | UM   | UM  |



|           |      |      |      |     |     |     |      |     |
|-----------|------|------|------|-----|-----|-----|------|-----|
| AT3G02350 | UM   | UM   | UM   | UM  | UM  | UM  | mCHH | UM  |
| AT3G02360 | gbM  | gbM  | gbM  | gbM | gbM | UM  | gbM  | UM  |
| AT3G02370 | UM   | UM   | UM   | UM  | UM  | UM  | UM   | UM  |
| AT3G02380 | UM   | UM   | UM   | UM  | UM  | UM  | UM   | UM  |
| AT3G02390 | UM   | UM   | UM   | UM  | UM  | UM  | UM   | UM  |
| AT3G02400 | mCHH | mCHH | mCHG | UM  | UM  | UM  | mCHH | UM  |
| AT3G02410 | UM   | UM   | UM   | UM  | UM  | UM  | UM   | UM  |
| AT3G02420 | UM   | UM   | UM   | UM  | UM  | UM  | UM   | UM  |
| AT3G02430 | UM   | UM   | UM   | UM  | UM  | UM  | UM   | UM  |
| AT3G02440 | UM   | UM   | UM   | UM  | UM  | UM  | UM   | UM  |
| AT3G02450 | gbM  | gbM  | gbM  | gbM | gbM | gbM | gbM  | gbM |
| AT3G02460 | UM   | UM   | UM   | UM  | UM  | UM  | mCHH | UM  |
| AT3G02468 | UM   | UM   | UM   | UM  | UM  | UM  | UM   | UM  |
| AT3G02470 | UM   | UM   | UM   | UM  | UM  | UM  | UM   | UM  |
| AT3G02480 | UM   | UM   | UM   | UM  | UM  | UM  | UM   | UM  |
| AT3G02490 | UM   | UM   | UM   | UM  | UM  | UM  | UM   | UM  |
| AT3G02493 | UM   | UM   | UM   | UM  | UM  | UM  | UM   | UM  |
| AT3G02500 | UM   | UM   | UM   | UM  | UM  | UM  | UM   | UM  |
| AT3G02510 | gbM  | UM   | UM   | UM  | UM  | UM  | UM   | UM  |
| AT3G02520 | UM   | UM   | UM   | UM  | UM  | UM  | UM   | UM  |
| AT3G02530 | gbM  | gbM  | gbM  | UM  | UM  | gbM | gbM  | UM  |
| AT3G02540 | UM   | UM   | UM   | UM  | UM  | UM  | UM   | UM  |
| AT3G02550 | UM   | UM   | UM   | UM  | UM  | UM  | UM   | UM  |
| AT3G02555 | UM   | UM   | UM   | UM  | UM  | UM  | UM   | UM  |
| AT3G02560 | UM   | UM   | UM   | UM  | UM  | UM  | UM   | UM  |
| AT3G02570 | UM   | UM   | UM   | UM  | UM  | UM  | UM   | UM  |
| AT3G02580 | UM   | UM   | UM   | UM  | UM  | UM  | UM   | UM  |
| AT3G02590 | UM   | UM   | UM   | UM  | UM  | UM  | UM   | UM  |
| AT3G02600 | UM   | UM   | UM   | UM  | UM  | UM  | UM   | UM  |
| AT3G02610 | UM   | UM   | UM   | UM  | UM  | UM  | UM   | UM  |
| AT3G02620 | UM   | UM   | UM   | UM  | UM  | UM  | UM   | UM  |
| AT3G02630 | UM   | UM   | UM   | UM  | UM  | UM  | UM   | UM  |
| AT3G02640 | UM   | UM   | UM   | UM  | UM  | UM  | UM   | UM  |
| AT3G02645 | UM   | UM   | UM   | UM  | UM  | UM  | UM   | UM  |
| AT3G02650 | UM   | UM   | UM   | UM  | UM  | UM  | UM   | UM  |
| AT3G02660 | gbM  | gbM  | gbM  | gbM | gbM | gbM | gbM  | gbM |
| AT3G02670 | UM   | UM   | UM   | UM  | UM  | UM  | UM   | UM  |
| AT3G02680 | UM   | gbM  | UM   | UM  | gbM | UM  | UM   | UM  |
| AT3G02690 | UM   | UM   | UM   | UM  | UM  | UM  | UM   | UM  |
| AT3G02700 | UM   | UM   | UM   | UM  | UM  | UM  | UM   | UM  |
| AT3G02710 | UM   | UM   | UM   | UM  | UM  | UM  | UM   | UM  |
| AT3G02720 | UM   | UM   | UM   | UM  | UM  | UM  | UM   | UM  |
| AT3G02730 | UM   | UM   | UM   | UM  | UM  | UM  | UM   | UM  |
| AT3G02740 | UM   | UM   | UM   | UM  | UM  | UM  | UM   | UM  |
| AT3G02750 | UM   | mCHH | UM   | UM  | UM  | UM  | gbM  | UM  |
| AT3G02760 | mCHG | UM   | UM   | UM  | UM  | UM  | mCHH | UM  |
| AT3G02770 | UM   | UM   | UM   | UM  | UM  | UM  | UM   | UM  |
| AT3G02780 | UM   | UM   | UM   | UM  | UM  | UM  | UM   | UM  |

|           |      |      |      |     |     |     |      |     |
|-----------|------|------|------|-----|-----|-----|------|-----|
| AT3G02790 | UM   | UM   | UM   | UM  | UM  | UM  | UM   | UM  |
| AT3G02800 | UM   | UM   | UM   | UM  | UM  | UM  | UM   | UM  |
| AT3G02810 | UM   | UM   | UM   | UM  | UM  | UM  | UM   | UM  |
| AT3G02820 | UM   | UM   | UM   | UM  | UM  | UM  | UM   | UM  |
| AT3G02830 | UM   | UM   | UM   | UM  | UM  | UM  | UM   | UM  |
| AT3G02840 | UM   | UM   | UM   | UM  | UM  | UM  | UM   | UM  |
| AT3G02850 | UM   | UM   | UM   | UM  | UM  | UM  | gbM  | UM  |
| AT3G02860 | UM   | UM   | UM   | UM  | UM  | UM  | UM   | UM  |
| AT3G02870 | UM   | UM   | UM   | UM  | UM  | UM  | UM   | UM  |
| AT3G02875 | UM   | UM   | UM   | UM  | UM  | UM  | UM   | UM  |
| AT3G02880 | UM   | UM   | UM   | UM  | UM  | UM  | UM   | UM  |
| AT3G02885 | UM   | UM   | UM   | UM  | UM  | UM  | UM   | UM  |
| AT3G02890 | gbM  | gbM  | gbM  | gbM | gbM | gbM | mCHH | gbM |
| AT3G02900 | UM   | UM   | UM   | UM  | UM  | UM  | UM   | UM  |
| AT3G02910 | UM   | UM   | UM   | UM  | UM  | UM  | UM   | UM  |
| AT3G02920 | UM   | UM   | UM   | UM  | UM  | UM  | UM   | UM  |
| AT3G02930 | mCHH | mCHH | mCHH | UM  | UM  | UM  | mCHH | UM  |
| AT3G02940 | UM   | UM   | UM   | UM  | UM  | UM  | UM   | UM  |
| AT3G02950 | UM   | UM   | UM   | UM  | UM  | UM  | UM   | UM  |
| AT3G02960 | UM   | UM   | UM   | UM  | UM  | UM  | UM   | UM  |
| AT3G02970 | UM   | UM   | UM   | UM  | UM  | UM  | UM   | UM  |
| AT3G02980 | UM   | UM   | UM   | UM  | UM  | UM  | UM   | UM  |
| AT3G02990 | UM   | UM   | UM   | UM  | UM  | UM  | UM   | UM  |
| AT3G03000 | UM   | UM   | UM   | UM  | UM  | UM  | UM   | UM  |
| AT3G03010 | UM   | UM   | UM   | UM  | UM  | UM  | UM   | UM  |
| AT3G03020 | UM   | UM   | UM   | UM  | UM  | UM  | UM   | UM  |
| AT3G03030 | UM   | UM   | UM   | UM  | UM  | UM  | UM   | UM  |
| AT3G03040 | UM   | UM   | UM   | UM  | UM  | UM  | UM   | UM  |
| AT3G03050 | gbM  | gbM  | gbM  | gbM | gbM | gbM | mCHH | gbM |
| AT3G03060 | gbM  | gbM  | gbM  | gbM | gbM | gbM | gbM  | gbM |
| AT3G03070 | UM   | UM   | UM   | UM  | UM  | UM  | UM   | UM  |
| AT3G03080 | UM   | UM   | UM   | UM  | UM  | UM  | UM   | UM  |
| AT3G03090 | gbM  | gbM  | UM   | UM  | UM  | UM  | gbM  | gbM |
| AT3G03100 | UM   | UM   | UM   | UM  | UM  | UM  | UM   | UM  |
| AT3G03110 | gbM  | gbM  | gbM  | UM  | UM  | gbM | mCHH | UM  |
| AT3G03120 | UM   | UM   | UM   | UM  | UM  | UM  | UM   | UM  |
| AT3G03130 | UM   | UM   | UM   | UM  | UM  | UM  | UM   | UM  |
| AT3G03140 | gbM  | gbM  | gbM  | gbM | gbM | gbM | gbM  | gbM |
| AT3G03150 | UM   | UM   | UM   | UM  | UM  | UM  | UM   | UM  |
| AT3G03160 | UM   | UM   | UM   | UM  | UM  | UM  | UM   | UM  |
| AT3G03170 | UM   | UM   | UM   | UM  | UM  | UM  | UM   | UM  |
| AT3G03180 | UM   | UM   | UM   | UM  | UM  | UM  | UM   | UM  |
| AT3G03190 | UM   | UM   | UM   | UM  | UM  | UM  | UM   | UM  |
| AT3G03200 | UM   | UM   | UM   | UM  | UM  | UM  | UM   | UM  |
| AT3G03210 | UM   | UM   | UM   | UM  | UM  | UM  | UM   | UM  |
| AT3G03220 | UM   | UM   | UM   | UM  | UM  | UM  | UM   | UM  |
| AT3G03230 | UM   | UM   | UM   | UM  | UM  | UM  | UM   | UM  |
| AT3G03240 | UM   | UM   | UM   | UM  | UM  | UM  | UM   | UM  |

|           |      |      |      |      |      |      |      |      |
|-----------|------|------|------|------|------|------|------|------|
| AT3G03250 | UM   | mCHH | UM   | UM   | UM   | UM   | mCHH | UM   |
| AT3G03260 | UM   |
| AT3G03270 | UM   |
| AT3G03272 | UM   |
| AT3G03280 | UM   |
| AT3G03290 | UM   |
| AT3G03300 | gbM  | gbM  | gbM  | gbM  | UM   | gbM  | mCHH | gbM  |
| AT3G03305 | UM   | gbM  | UM   | UM   | UM   | UM   | mCHH | UM   |
| AT3G03310 | UM   |
| AT3G03320 | UM   |
| AT3G03330 | UM   |
| AT3G03340 | gbM  | UM   |
| AT3G03341 | UM   |
| AT3G03350 | UM   | UM   | UM   | UM   | UM   | UM   | mCHH | UM   |
| AT3G03360 | gbM  |
| AT3G03370 | UM   |
| AT3G03380 | gbM  | gbM  | gbM  | gbM  | gbM  | gbM  | mCHH | UM   |
| AT3G03400 | UM   |
| AT3G03405 | mCHH | mCHH | mCHH | mCHG | mCHH | mCHH | mCHH | mCHG |
| AT3G03410 | UM   |
| AT3G03420 | UM   | UM   | UM   | UM   | UM   | UM   | mCHH | UM   |
| AT3G03430 | UM   |
| AT3G03440 | UM   |
| AT3G03450 | UM   |
| AT3G03456 | UM   |
| AT3G03460 | UM   |
| AT3G03470 | UM   |
| AT3G03480 | UM   |
| AT3G03490 | UM   |
| AT3G03500 | UM   |
| AT3G03510 | UM   |
| AT3G03520 | UM   |
| AT3G03530 | UM   |
| AT3G03540 | UM   |
| AT3G03550 | UM   |
| AT3G03560 | UM   |
| AT3G03570 | UM   | gbM  | UM   | UM   | UM   | UM   | mCHH | UM   |
| AT3G03580 | UM   | mCHH | UM   | UM   | UM   | UM   | UM   | UM   |
| AT3G03590 | UM   |
| AT3G03600 | UM   |
| AT3G03610 | UM   |
| AT3G03620 | mCHH | mCHH | mCHG | UM   | UM   | UM   | mCHH | mCHG |
| AT3G03626 | UM   |
| AT3G03630 | UM   |
| AT3G03640 | UM   |
| AT3G03650 | UM   |
| AT3G03660 | UM   |
| AT3G03670 | UM   |

|           |      |      |     |     |     |     |      |     |
|-----------|------|------|-----|-----|-----|-----|------|-----|
| AT3G03680 | UM   | UM   | UM  | UM  | UM  | UM  | UM   | UM  |
| AT3G03690 | UM   | UM   | UM  | UM  | UM  | UM  | UM   | UM  |
| AT3G03700 | UM   | UM   | UM  | UM  | UM  | UM  | UM   | UM  |
| AT3G03710 | gbM  | gbM  | gbM | UM  | UM  | UM  | mCHH | UM  |
| AT3G03720 | UM   | UM   | UM  | UM  | UM  | UM  | UM   | UM  |
| AT3G03726 | mCHH | mCHH | UM  | UM  | UM  | UM  | mCHH | UM  |
| AT3G03730 | UM   | mCHH | UM  | UM  | UM  | UM  | mCHH | UM  |
| AT3G03740 | gbM  | gbM  | gbM | UM  | UM  | UM  | gbM  | UM  |
| AT3G03750 | UM   | UM   | UM  | UM  | UM  | UM  | UM   | UM  |
| AT3G03760 | UM   | UM   | UM  | UM  | UM  | UM  | UM   | UM  |
| AT3G03770 | UM   | UM   | UM  | UM  | UM  | UM  | mCHH | UM  |
| AT3G03773 | UM   | UM   | UM  | UM  | UM  | UM  | UM   | UM  |
| AT3G03776 | UM   | UM   | UM  | UM  | UM  | UM  | UM   | UM  |
| AT3G03780 | UM   | UM   | UM  | UM  | UM  | UM  | UM   | UM  |
| AT3G03790 | gbM  | mCHH | gbM | gbM | gbM | gbM | mCHH | gbM |
| AT3G03800 | UM   | UM   | UM  | UM  | UM  | UM  | UM   | UM  |
| AT3G03810 | gbM  | gbM  | gbM | gbM | gbM | gbM | gbM  | gbM |
| AT3G03820 | UM   | UM   | UM  | UM  | UM  | UM  | UM   | UM  |
| AT3G03826 | UM   | UM   | UM  | UM  | UM  | UM  | UM   | UM  |
| AT3G03828 | UM   | UM   | UM  | UM  | UM  | UM  | UM   | UM  |
| AT3G03830 | UM   | UM   | UM  | UM  | UM  | UM  | UM   | UM  |
| AT3G03840 | UM   | UM   | UM  | UM  | UM  | UM  | UM   | UM  |
| AT3G03847 | UM   | UM   | UM  | UM  | UM  | UM  | UM   | UM  |
| AT3G03850 | UM   | UM   | UM  | UM  | UM  | UM  | UM   | UM  |
| AT3G03860 | UM   | UM   | UM  | UM  | UM  | UM  | UM   | UM  |
| AT3G03870 | UM   | UM   | UM  | UM  | UM  | UM  | UM   | UM  |
| AT3G03880 | UM   | UM   | UM  | UM  | UM  | UM  | UM   | UM  |
| AT3G03890 | UM   | UM   | UM  | UM  | UM  | UM  | UM   | UM  |
| AT3G03900 | UM   | UM   | UM  | UM  | UM  | UM  | UM   | UM  |
| AT3G03910 | UM   | mCHH | UM  | UM  | UM  | UM  | UM   | UM  |
| AT3G03920 | UM   | UM   | UM  | UM  | UM  | UM  | UM   | UM  |
| AT3G03930 | UM   | UM   | UM  | UM  | UM  | UM  | UM   | UM  |
| AT3G03940 | gbM  | gbM  | gbM | gbM | gbM | gbM | gbM  | gbM |
| AT3G03950 | UM   | UM   | UM  | UM  | UM  | UM  | UM   | UM  |
| AT3G03960 | UM   | UM   | UM  | UM  | UM  | UM  | UM   | UM  |
| AT3G03970 | UM   | UM   | UM  | UM  | UM  | UM  | UM   | UM  |
| AT3G03980 | UM   | UM   | UM  | UM  | UM  | UM  | UM   | UM  |
| AT3G03990 | UM   | UM   | UM  | UM  | UM  | UM  | UM   | UM  |
| AT3G04000 | UM   | UM   | UM  | UM  | UM  | UM  | UM   | UM  |
| AT3G04010 | UM   | UM   | UM  | UM  | UM  | UM  | UM   | UM  |
| AT3G04020 | UM   | UM   | UM  | UM  | UM  | UM  | UM   | UM  |
| AT3G04030 | UM   | UM   | UM  | UM  | UM  | UM  | UM   | UM  |
| AT3G04040 | UM   | UM   | UM  | UM  | UM  | UM  | UM   | UM  |
| AT3G04050 | UM   | UM   | UM  | UM  | UM  | UM  | UM   | UM  |
| AT3G04060 | UM   | UM   | UM  | UM  | UM  | UM  | UM   | UM  |
| AT3G04070 | UM   | UM   | UM  | UM  | UM  | UM  | UM   | UM  |
| AT3G04080 | UM   | UM   | UM  | UM  | UM  | UM  | UM   | UM  |
| AT3G04090 | UM   | UM   | UM  | UM  | UM  | UM  | UM   | UM  |



|           |      |      |      |      |      |      |      |      |
|-----------|------|------|------|------|------|------|------|------|
| AT3G04100 | mCHH | mCHH | mCHH | mCHG | mCHG | mCHH | mCHH | mCHG |
| AT3G04110 | UM   |
| AT3G04120 | UM   |
| AT3G04130 | gbM  |
| AT3G04140 | UM   |
| AT3G04150 | UM   |
| AT3G04160 | UM   | mCHH | UM   | UM   | UM   | UM   | mCHH | UM   |
| AT3G04170 | UM   |
| AT3G04180 | UM   |
| AT3G04181 | UM   |
| AT3G04184 | UM   |
| AT3G04190 | UM   |
| AT3G04200 | UM   |
| AT3G04210 | UM   |
| AT3G04220 | UM   | UM   | UM   | UM   | UM   | UM   | mCHH | UM   |
| AT3G04230 | UM   |
| AT3G04240 | gbM  | mCHH | gbM  | gbM  | gbM  | gbM  | mCHH | gbM  |
| AT3G04250 | mCHH | mCHH | gbM  | gbM  | mCHH | mCHH | mCHH | gbM  |
| AT3G04260 | UM   | gbM  | UM   | UM   | UM   | UM   | mCHH | UM   |
| AT3G04270 | UM   |
| AT3G04280 | UM   |
| AT3G04290 | UM   |
| AT3G04300 | UM   |
| AT3G04310 | UM   |
| AT3G04320 | UM   |
| AT3G04330 | UM   |
| AT3G04340 | gbM  | mCHH | mCHH | gbM  | gbM  | gbM  | mCHH | gbM  |
| AT3G04350 | gbM  |
| AT3G04360 | UM   |
| AT3G04370 | UM   | UM   | UM   | UM   | UM   | UM   | mCHH | UM   |
| AT3G04380 | UM   |
| AT3G04390 | UM   |
| AT3G04400 | UM   |
| AT3G04410 | UM   |
| AT3G04420 | UM   |
| AT3G04430 | UM   |
| AT3G04440 | UM   |
| AT3G04450 | UM   |
| AT3G04460 | UM   |
| AT3G04470 | gbM  | mCHH | gbM  | gbM  | gbM  | gbM  | gbM  | gbM  |
| AT3G04480 | gbM  |
| AT3G04490 | gbM  | gbM  | gbM  | gbM  | UM   | gbM  | mCHH | gbM  |
| AT3G04500 | UM   |
| AT3G04510 | UM   |
| AT3G04520 | UM   |
| AT3G04530 | UM   |
| AT3G04540 | UM   |
| AT3G04545 | UM   |

|           |     |     |     |     |     |     |      |     |
|-----------|-----|-----|-----|-----|-----|-----|------|-----|
| AT3G04550 | UM   | UM  |
| AT3G04560 | UM   | UM  |
| AT3G04570 | UM   | UM  |
| AT3G04580 | gbM  | gbM |
| AT3G04590 | UM   | UM  |
| AT3G04600 | UM   | UM  |
| AT3G04610 | gbM  | gbM |
| AT3G04620 | UM   | UM  |
| AT3G04630 | UM   | UM  |
| AT3G04640 | UM   | UM  |
| AT3G04650 | UM   | UM  |
| AT3G04660 | UM   | UM  |
| AT3G04670 | UM   | UM  |
| AT3G04680 | gbM  | gbM |
| AT3G04690 | UM   | UM  |
| AT3G04700 | UM   | UM  |
| AT3G04710 | gbM  | gbM |
| AT3G04720 | UM   | UM  |
| AT3G04721 | UM   | UM  |
| AT3G04730 | UM   | UM  |
| AT3G04732 | UM   | UM  |
| AT3G04735 | UM   | UM  |
| AT3G04740 | gbM | gbM | gbM | gbM | gbM | gbM | mCHH | gbM |
| AT3G04750 | UM   | UM  |
| AT3G04760 | UM   | UM  |
| AT3G04770 | UM   | UM  |
| AT3G04780 | UM   | UM  |
| AT3G04790 | UM   | UM  |
| AT3G04800 | UM   | UM  |
| AT3G04810 | gbM  | gbM |
| AT3G04820 | UM   | UM  |
| AT3G04830 | UM   | UM  |
| AT3G04840 | UM   | UM  |
| AT3G04850 | UM   | UM  |
| AT3G04854 | UM   | UM  |
| AT3G04855 | UM   | UM  |
| AT3G04860 | UM   | UM  |
| AT3G04870 | gbM | gbM | gbM | gbM | gbM | UM  | gbM  | gbM |
| AT3G04880 | UM   | UM  |
| AT3G04890 | UM   | UM  |
| AT3G04900 | UM   | UM  |
| AT3G04903 | UM   | UM  |
| AT3G04910 | UM  | UM  | UM  | UM  | UM  | UM  | gbM  | UM  |
| AT3G04920 | UM   | UM  |
| AT3G04930 | UM   | UM  |
| AT3G04940 | UM   | UM  |
| AT3G04943 | UM   | UM  |
| AT3G04945 | UM   | UM  |



|           |      |      |      |      |      |      |      |      |
|-----------|------|------|------|------|------|------|------|------|
| AT3G05370 | UM   |
| AT3G05380 | gbM  | mCHH | gbM  | gbM  | gbM  | gbM  | mCHH | gbM  |
| AT3G05390 | UM   |
| AT3G05400 | UM   |
| AT3G05410 | UM   |
| AT3G05420 | gbM  | gbM  | gbM  | UM   | UM   | gbM  | gbM  | gbM  |
| AT3G05425 | UM   |
| AT3G05430 | UM   |
| AT3G05440 | UM   |
| AT3G05450 | UM   |
| AT3G05460 | UM   | UM   | UM   | UM   | UM   | UM   | mCHH | UM   |
| AT3G05470 | UM   |
| AT3G05480 | UM   |
| AT3G05490 | UM   |
| AT3G05500 | UM   |
| AT3G05510 | UM   |
| AT3G05520 | UM   |
| AT3G05530 | UM   |
| AT3G05540 | UM   | mCHH | mCHH | UM   | UM   | UM   | mCHH | UM   |
| AT3G05545 | gbM  |
| AT3G05550 | UM   |
| AT3G05560 | UM   |
| AT3G05570 | UM   |
| AT3G05580 | UM   |
| AT3G05590 | UM   |
| AT3G05600 | UM   |
| AT3G05602 | UM   |
| AT3G05610 | UM   | UM   | UM   | UM   | UM   | UM   | mCHH | UM   |
| AT3G05620 | UM   |
| AT3G05625 | UM   |
| AT3G05630 | gbM  | gbM  | gbM  | gbM  | gbM  | gbM  | mCHH | gbM  |
| AT3G05640 | UM   |
| AT3G05650 | UM   |
| AT3G05660 | UM   | mCHH | UM   | UM   | UM   | UM   | mCHH | UM   |
| AT3G05670 | gbM  | mCHH | gbM  | gbM  | gbM  | gbM  | gbM  | gbM  |
| AT3G05675 | UM   | gbM  | gbM  | UM   | gbM  | UM   | mCHH | UM   |
| AT3G05680 | gbM  | mCHH | gbM  | gbM  | gbM  | gbM  | mCHH | gbM  |
| AT3G05685 | UM   |
| AT3G05690 | UM   |
| AT3G05700 | UM   |
| AT3G05710 | UM   |
| AT3G05720 | UM   |
| AT3G05725 | mCHH | mCHH | mCHH | mCHG | mCHH | mCHG | mCHH | mCHH |
| AT3G05727 | UM   |
| AT3G05730 | UM   |
| AT3G05740 | UM   |
| AT3G05741 | UM   |
| AT3G05746 | UM   |

|           |      |      |      |     |     |     |      |     |
|-----------|------|------|------|-----|-----|-----|------|-----|
| AT3G05750 | gbM  | gbM  | gbM  | UM  | gbM | UM  | gbM  | gbM |
| AT3G05760 | UM   | gbM  | UM   | UM  | UM  | UM  | UM   | UM  |
| AT3G05770 | UM   | UM   | UM   | UM  | UM  | UM  | UM   | UM  |
| AT3G05780 | UM   | UM   | UM   | UM  | UM  | UM  | UM   | UM  |
| AT3G05790 | UM   | UM   | UM   | UM  | UM  | UM  | UM   | UM  |
| AT3G05800 | UM   | UM   | UM   | UM  | UM  | UM  | UM   | UM  |
| AT3G05810 | UM   | UM   | UM   | UM  | UM  | UM  | UM   | UM  |
| AT3G05820 | UM   | UM   | UM   | UM  | UM  | UM  | UM   | UM  |
| AT3G05830 | UM   | UM   | UM   | UM  | UM  | UM  | UM   | UM  |
| AT3G05840 | gbM  | gbM  | gbM  | gbM | gbM | gbM | gbM  | gbM |
| AT3G05858 | UM   | UM   | UM   | UM  | UM  | UM  | UM   | UM  |
| AT3G05860 | UM   | UM   | UM   | UM  | UM  | UM  | mCHH | UM  |
| AT3G05870 | UM   | UM   | UM   | UM  | UM  | UM  | UM   | UM  |
| AT3G05880 | UM   | UM   | UM   | UM  | UM  | UM  | UM   | UM  |
| AT3G05890 | UM   | UM   | UM   | UM  | UM  | UM  | UM   | UM  |
| AT3G05900 | mCHH | UM   | mCHG | UM  | UM  | UM  | mCHH | UM  |
| AT3G05910 | UM   | UM   | UM   | UM  | UM  | UM  | UM   | UM  |
| AT3G05920 | UM   | UM   | UM   | UM  | UM  | UM  | UM   | UM  |
| AT3G05930 | gbM  | gbM  | UM   | UM  | UM  | UM  | gbM  | UM  |
| AT3G05935 | UM   | UM   | UM   | UM  | UM  | UM  | UM   | UM  |
| AT3G05936 | UM   | UM   | UM   | UM  | UM  | UM  | UM   | UM  |
| AT3G05937 | UM   | UM   | UM   | UM  | UM  | UM  | UM   | UM  |
| AT3G05940 | UM   | UM   | UM   | UM  | UM  | UM  | UM   | UM  |
| AT3G05950 | UM   | UM   | UM   | UM  | UM  | UM  | UM   | UM  |
| AT3G05960 | UM   | UM   | UM   | UM  | UM  | UM  | UM   | UM  |
| AT3G05970 | UM   | UM   | UM   | UM  | UM  | UM  | mCHH | UM  |
| AT3G05975 | UM   | UM   | UM   | UM  | UM  | UM  | UM   | UM  |
| AT3G05980 | mCHH | mCHH | UM   | UM  | UM  | UM  | UM   | UM  |
| AT3G05990 | UM   | UM   | UM   | UM  | UM  | UM  | UM   | UM  |
| AT3G06000 | UM   | UM   | UM   | UM  | UM  | UM  | UM   | UM  |
| AT3G06010 | mCHH | gbM  | mCHH | gbM | gbM | gbM | mCHH | gbM |
| AT3G06019 | UM   | UM   | UM   | UM  | UM  | UM  | UM   | UM  |
| AT3G06020 | UM   | UM   | UM   | UM  | UM  | UM  | mCHH | UM  |
| AT3G06030 | UM   | UM   | UM   | UM  | UM  | UM  | UM   | UM  |
| AT3G06035 | UM   | UM   | UM   | UM  | UM  | UM  | UM   | UM  |
| AT3G06040 | UM   | UM   | UM   | UM  | UM  | UM  | UM   | UM  |
| AT3G06050 | UM   | UM   | UM   | UM  | UM  | UM  | UM   | UM  |
| AT3G06060 | UM   | UM   | UM   | UM  | UM  | UM  | UM   | UM  |
| AT3G06070 | UM   | UM   | UM   | UM  | UM  | UM  | UM   | UM  |
| AT3G06080 | UM   | UM   | UM   | UM  | UM  | UM  | UM   | UM  |
| AT3G06090 | UM   | UM   | UM   | UM  | UM  | UM  | UM   | UM  |
| AT3G06100 | UM   | UM   | UM   | UM  | UM  | UM  | UM   | UM  |
| AT3G06110 | UM   | UM   | UM   | UM  | UM  | UM  | UM   | UM  |
| AT3G06120 | UM   | UM   | UM   | UM  | UM  | UM  | UM   | UM  |
| AT3G06130 | UM   | UM   | UM   | UM  | UM  | UM  | UM   | UM  |
| AT3G06140 | UM   | UM   | UM   | UM  | UM  | UM  | UM   | UM  |
| AT3G06142 | UM   | UM   | UM   | UM  | UM  | UM  | UM   | UM  |
| AT3G06145 | UM   | UM   | UM   | UM  | UM  | UM  | UM   | UM  |

|           |      |      |      |      |      |     |      |      |
|-----------|------|------|------|------|------|-----|------|------|
| AT3G06150 | UM   | UM   | UM   | UM   | UM   | UM  | UM   | UM   |
| AT3G06160 | UM   | UM   | UM   | UM   | UM   | UM  | UM   | UM   |
| AT3G06170 | UM   | gbM  | UM   | UM   | UM   | UM  | mCHH | UM   |
| AT3G06180 | mCHH | UM   | UM   | UM   | UM   | UM  | mCHH | UM   |
| AT3G06190 | UM   | UM   | UM   | UM   | UM   | UM  | UM   | UM   |
| AT3G06200 | UM   | UM   | UM   | UM   | UM   | UM  | UM   | UM   |
| AT3G06210 | UM   | UM   | UM   | UM   | UM   | UM  | UM   | UM   |
| AT3G06220 | UM   | UM   | UM   | UM   | UM   | UM  | UM   | UM   |
| AT3G06230 | UM   | UM   | UM   | UM   | UM   | UM  | UM   | UM   |
| AT3G06240 | UM   | UM   | UM   | UM   | UM   | UM  | UM   | UM   |
| AT3G06250 | gbM  | gbM  | gbM  | gbM  | gbM  | gbM | gbM  | gbM  |
| AT3G06260 | UM   | UM   | UM   | UM   | UM   | UM  | UM   | UM   |
| AT3G06270 | UM   | UM   | UM   | UM   | UM   | UM  | UM   | UM   |
| AT3G06280 | UM   | UM   | UM   | UM   | UM   | UM  | UM   | UM   |
| AT3G06290 | gbM  | gbM  | gbM  | gbM  | gbM  | gbM | gbM  | gbM  |
| AT3G06300 | UM   | UM   | UM   | UM   | UM   | UM  | UM   | UM   |
| AT3G06310 | UM   | UM   | UM   | UM   | UM   | UM  | UM   | UM   |
| AT3G06320 | UM   | UM   | UM   | UM   | UM   | UM  | UM   | UM   |
| AT3G06330 | UM   | UM   | UM   | UM   | UM   | UM  | UM   | UM   |
| AT3G06340 | gbM  | gbM  | gbM  | UM   | UM   | UM  | mCHH | UM   |
| AT3G06350 | UM   | UM   | UM   | UM   | UM   | UM  | UM   | UM   |
| AT3G06360 | UM   | UM   | UM   | UM   | UM   | UM  | UM   | UM   |
| AT3G06370 | UM   | UM   | UM   | UM   | UM   | UM  | UM   | UM   |
| AT3G06380 | UM   | UM   | UM   | UM   | UM   | UM  | UM   | UM   |
| AT3G06390 | UM   | UM   | UM   | UM   | UM   | UM  | UM   | UM   |
| AT3G06400 | gbM  | mCHH | gbM  | gbM  | gbM  | gbM | mCHH | gbM  |
| AT3G06410 | UM   | UM   | UM   | UM   | UM   | UM  | UM   | UM   |
| AT3G06420 | UM   | UM   | UM   | UM   | UM   | UM  | UM   | UM   |
| AT3G06430 | UM   | UM   | UM   | UM   | UM   | UM  | UM   | UM   |
| AT3G06435 | mCHH | mCHH | mCHH | mCHH | mCHH | UM  | mCHH | mCHH |
| AT3G06440 | UM   | UM   | gbM  | gbM  | gbM  | gbM | mCHH | gbM  |
| AT3G06450 | UM   | gbM  | UM   | UM   | UM   | UM  | gbM  | UM   |
| AT3G06455 | UM   | UM   | UM   | UM   | UM   | UM  | UM   | UM   |
| AT3G06460 | UM   | UM   | UM   | UM   | UM   | UM  | UM   | UM   |
| AT3G06470 | UM   | UM   | UM   | UM   | UM   | UM  | UM   | UM   |
| AT3G06480 | gbM  | gbM  | gbM  | gbM  | gbM  | gbM | gbM  | gbM  |
| AT3G06483 | UM   | UM   | UM   | UM   | UM   | UM  | UM   | UM   |
| AT3G06490 | UM   | UM   | UM   | UM   | UM   | UM  | UM   | UM   |
| AT3G06500 | UM   | mCHG | UM   | UM   | UM   | UM  | gbM  | UM   |
| AT3G06510 | gbM  | gbM  | gbM  | gbM  | UM   | gbM | gbM  | gbM  |
| AT3G06520 | UM   | UM   | UM   | UM   | UM   | UM  | UM   | UM   |
| AT3G06530 | gbM  | mCHH | gbM  | gbM  | gbM  | gbM | mCHH | gbM  |
| AT3G06540 | UM   | UM   | UM   | UM   | UM   | UM  | UM   | UM   |
| AT3G06545 | UM   | UM   | UM   | UM   | UM   | UM  | UM   | UM   |
| AT3G06550 | UM   | UM   | UM   | UM   | UM   | UM  | mCHH | UM   |
| AT3G06560 | UM   | UM   | UM   | UM   | UM   | UM  | UM   | UM   |
| AT3G06570 | UM   | UM   | UM   | UM   | UM   | UM  | UM   | UM   |
| AT3G06580 | mCHG | mCHG | UM   | UM   | UM   | UM  | mCHH | UM   |



|           |      |      |      |      |      |      |      |      |
|-----------|------|------|------|------|------|------|------|------|
| AT3G07060 | UM   | UM   | UM   | UM   | UM   | UM   | mCHH | UM   |
| AT3G07070 | UM   |
| AT3G07080 | UM   |
| AT3G07090 | UM   |
| AT3G07100 | gbM  | mCHH | gbM  | gbM  | gbM  | gbM  | gbM  | gbM  |
| AT3G07110 | UM   |
| AT3G07120 | UM   |
| AT3G07130 | UM   |
| AT3G07140 | UM   |
| AT3G07150 | UM   |
| AT3G07160 | gbM  | mCHH | gbM  | gbM  | gbM  | gbM  | mCHH | gbM  |
| AT3G07170 | UM   | UM   | UM   | UM   | gbM  | UM   | UM   | UM   |
| AT3G07180 | UM   |
| AT3G07190 | UM   |
| AT3G07195 | UM   |
| AT3G07200 | UM   |
| AT3G07210 | gbM  | gbM  | gbM  | UM   | UM   | UM   | gbM  | UM   |
| AT3G07220 | UM   |
| AT3G07230 | UM   |
| AT3G07250 | UM   |
| AT3G07260 | UM   |
| AT3G07270 | gbM  | gbM  | gbM  | UM   | UM   | gbM  | gbM  | gbM  |
| AT3G07273 | UM   |
| AT3G07290 | UM   |
| AT3G07300 | UM   |
| AT3G07310 | UM   |
| AT3G07320 | UM   |
| AT3G07330 | UM   |
| AT3G07340 | UM   |
| AT3G07350 | UM   |
| AT3G07360 | UM   |
| AT3G07370 | UM   |
| AT3G07380 | mCHH | mCHH | mCHH | mCHG | mCHG | mCHG | mCHH | mCHG |
| AT3G07390 | UM   |
| AT3G07400 | gbM  | gbM  | gbM  | gbM  | UM   | gbM  | gbM  | gbM  |
| AT3G07410 | UM   |
| AT3G07420 | UM   |
| AT3G07425 | UM   |
| AT3G07430 | UM   |
| AT3G07440 | UM   |
| AT3G07450 | UM   |
| AT3G07460 | mCHH | UM   |
| AT3G07470 | UM   |
| AT3G07480 | UM   |
| AT3G07490 | UM   |
| AT3G07500 | UM   |
| AT3G07510 | UM   |
| AT3G07520 | UM   |



|           |     |      |     |     |     |     |      |     |
|-----------|-----|------|-----|-----|-----|-----|------|-----|
| AT3G07522 | UM  | gbM  | gbM | gbM | gbM | gbM | UM   | gbM |
| AT3G07525 | UM  | UM   | UM  | UM  | UM  | UM  | UM   | UM  |
| AT3G07530 | UM  | UM   | UM  | UM  | UM  | UM  | UM   | UM  |
| AT3G07540 | UM  | UM   | UM  | UM  | UM  | UM  | UM   | UM  |
| AT3G07550 | UM  | UM   | UM  | UM  | UM  | UM  | UM   | UM  |
| AT3G07560 | UM  | UM   | UM  | UM  | UM  | UM  | UM   | UM  |
| AT3G07565 | UM  | UM   | UM  | UM  | UM  | UM  | UM   | UM  |
| AT3G07568 | UM  | UM   | UM  | UM  | UM  | UM  | UM   | UM  |
| AT3G07570 | UM  | UM   | UM  | UM  | UM  | UM  | UM   | UM  |
| AT3G07580 | UM  | UM   | UM  | UM  | UM  | UM  | UM   | UM  |
| AT3G07590 | gbM | gbM  | gbM | UM  | UM  | UM  | gbM  | UM  |
| AT3G07600 | UM  | UM   | UM  | UM  | UM  | UM  | UM   | UM  |
| AT3G07610 | gbM | gbM  | gbM | UM  | UM  | UM  | mCHH | UM  |
| AT3G07620 | UM  | UM   | UM  | UM  | UM  | UM  | UM   | UM  |
| AT3G07630 | UM  | UM   | UM  | UM  | UM  | UM  | UM   | UM  |
| AT3G07640 | UM  | UM   | UM  | UM  | UM  | UM  | UM   | UM  |
| AT3G07650 | UM  | UM   | UM  | UM  | UM  | UM  | UM   | UM  |
| AT3G07660 | gbM | gbM  | gbM | gbM | gbM | gbM | gbM  | gbM |
| AT3G07670 | UM  | UM   | UM  | UM  | UM  | UM  | mCHH | UM  |
| AT3G07680 | UM  | UM   | UM  | UM  | UM  | UM  | UM   | UM  |
| AT3G07690 | UM  | UM   | UM  | UM  | UM  | UM  | UM   | UM  |
| AT3G07700 | gbM | mCHH | gbM | gbM | gbM | gbM | gbM  | gbM |
| AT3G07710 | UM  | UM   | UM  | UM  | UM  | UM  | mCHH | UM  |
| AT3G07720 | UM  | UM   | UM  | UM  | UM  | UM  | UM   | UM  |
| AT3G07730 | UM  | mCHH | UM  | UM  | UM  | UM  | mCHH | UM  |
| AT3G07740 | UM  | UM   | UM  | UM  | UM  | UM  | UM   | UM  |
| AT3G07750 | UM  | UM   | UM  | UM  | UM  | UM  | UM   | UM  |
| AT3G07760 | UM  | UM   | UM  | UM  | UM  | UM  | UM   | UM  |
| AT3G07770 | UM  | UM   | UM  | UM  | UM  | UM  | UM   | UM  |
| AT3G07780 | UM  | UM   | UM  | UM  | UM  | UM  | mCHH | UM  |
| AT3G07790 | UM  | gbM  | UM  | UM  | UM  | UM  | UM   | UM  |
| AT3G07800 | UM  | UM   | UM  | UM  | UM  | UM  | UM   | UM  |
| AT3G07810 | gbM | gbM  | gbM | gbM | UM  | UM  | gbM  | UM  |
| AT3G07820 | UM  | UM   | UM  | UM  | UM  | UM  | UM   | UM  |
| AT3G07830 | UM  | UM   | UM  | UM  | UM  | UM  | UM   | UM  |
| AT3G07840 | UM  | UM   | UM  | UM  | UM  | UM  | UM   | UM  |
| AT3G07850 | UM  | UM   | UM  | UM  | UM  | UM  | UM   | UM  |
| AT3G07860 | UM  | UM   | UM  | UM  | UM  | UM  | UM   | UM  |
| AT3G07870 | UM  | UM   | UM  | UM  | UM  | UM  | UM   | UM  |
| AT3G07880 | UM  | UM   | UM  | UM  | UM  | UM  | UM   | UM  |
| AT3G07890 | UM  | UM   | UM  | UM  | UM  | UM  | UM   | UM  |
| AT3G07900 | UM  | UM   | UM  | UM  | UM  | UM  | UM   | UM  |
| AT3G07910 | UM  | UM   | UM  | UM  | UM  | UM  | UM   | UM  |
| AT3G07920 | UM  | UM   | UM  | UM  | UM  | UM  | UM   | UM  |
| AT3G07930 | UM  | UM   | UM  | UM  | UM  | UM  | UM   | UM  |
| AT3G07940 | UM  | UM   | UM  | UM  | UM  | UM  | UM   | UM  |
| AT3G07950 | UM  | UM   | UM  | UM  | UM  | UM  | UM   | UM  |
| AT3G07960 | UM  | UM   | UM  | UM  | UM  | UM  | UM   | UM  |

|           |     |      |     |     |     |     |      |     |
|-----------|-----|------|-----|-----|-----|-----|------|-----|
| AT3G07970 | UM  | UM   | UM  | UM  | UM  | UM  | UM   | UM  |
| AT3G07980 | gbM | gbM  | gbM | gbM | gbM | gbM | mCHH | gbM |
| AT3G07990 | UM  | UM   | UM  | UM  | UM  | UM  | UM   | UM  |
| AT3G08000 | UM  | UM   | UM  | UM  | UM  | UM  | UM   | UM  |
| AT3G08010 | UM  | UM   | UM  | UM  | UM  | UM  | UM   | UM  |
| AT3G08020 | UM  | UM   | UM  | UM  | UM  | UM  | UM   | UM  |
| AT3G08030 | UM  | UM   | UM  | UM  | UM  | UM  | UM   | UM  |
| AT3G08040 | UM  | UM   | UM  | UM  | UM  | UM  | UM   | UM  |
| AT3G08490 | UM  | UM   | UM  | UM  | UM  | UM  | UM   | UM  |
| AT3G08500 | UM  | mCHG | UM  | UM  | UM  | UM  | UM   | UM  |
| AT3G08505 | UM  | UM   | UM  | UM  | UM  | UM  | UM   | UM  |
| AT3G08510 | UM  | UM   | UM  | UM  | UM  | UM  | UM   | UM  |
| AT3G08520 | UM  | UM   | UM  | UM  | UM  | UM  | UM   | UM  |
| AT3G08530 | gbM | mCHH | gbM | gbM | gbM | gbM | gbM  | gbM |
| AT3G08550 | UM  | UM   | UM  | UM  | UM  | UM  | mCHH | UM  |
| AT3G08560 | UM  | UM   | UM  | UM  | UM  | UM  | UM   | UM  |
| AT3G08570 | UM  | UM   | UM  | UM  | UM  | UM  | UM   | UM  |
| AT3G08580 | UM  | UM   | UM  | UM  | UM  | UM  | UM   | UM  |
| AT3G08590 | UM  | UM   | UM  | UM  | UM  | UM  | UM   | UM  |
| AT3G08600 | UM  | UM   | UM  | UM  | UM  | UM  | UM   | UM  |
| AT3G08610 | UM  | UM   | UM  | UM  | UM  | UM  | UM   | UM  |
| AT3G08620 | UM  | UM   | UM  | UM  | UM  | UM  | UM   | UM  |
| AT3G08630 | UM  | UM   | UM  | UM  | UM  | UM  | UM   | UM  |
| AT3G08636 | UM  | UM   | UM  | UM  | UM  | UM  | UM   | UM  |
| AT3G08640 | UM  | UM   | UM  | UM  | UM  | UM  | UM   | UM  |
| AT3G08650 | gbM | gbM  | gbM | gbM | gbM | gbM | gbM  | gbM |
| AT3G08660 | UM  | UM   | UM  | UM  | UM  | UM  | UM   | UM  |
| AT3G08670 | UM  | UM   | UM  | UM  | UM  | UM  | UM   | UM  |
| AT3G08680 | UM  | UM   | UM  | UM  | UM  | UM  | UM   | UM  |
| AT3G08690 | UM  | UM   | UM  | UM  | UM  | UM  | UM   | UM  |
| AT3G08700 | UM  | UM   | UM  | UM  | UM  | UM  | UM   | UM  |
| AT3G08710 | UM  | UM   | UM  | UM  | UM  | UM  | UM   | UM  |
| AT3G08720 | UM  | UM   | UM  | UM  | UM  | UM  | UM   | UM  |
| AT3G08730 | gbM | gbM  | UM  | UM  | UM  | UM  | mCHH | UM  |
| AT3G08740 | UM  | UM   | UM  | UM  | UM  | UM  | UM   | UM  |
| AT3G08750 | UM  | UM   | UM  | UM  | UM  | UM  | UM   | UM  |
| AT3G08760 | UM  | gbM  | UM  | UM  | UM  | UM  | gbM  | UM  |
| AT3G08762 | UM  | UM   | UM  | UM  | UM  | UM  | UM   | UM  |
| AT3G08770 | UM  | UM   | UM  | UM  | UM  | UM  | UM   | UM  |
| AT3G08780 | UM  | UM   | UM  | UM  | UM  | UM  | UM   | UM  |
| AT3G08790 | UM  | UM   | UM  | UM  | UM  | UM  | UM   | UM  |
| AT3G08800 | UM  | UM   | UM  | UM  | UM  | UM  | UM   | UM  |
| AT3G08810 | UM  | UM   | UM  | UM  | UM  | UM  | UM   | UM  |
| AT3G08820 | UM  | UM   | UM  | UM  | UM  | UM  | UM   | UM  |
| AT3G08840 | UM  | UM   | UM  | UM  | UM  | UM  | UM   | UM  |
| AT3G08850 | gbM | mCHH | gbM | gbM | gbM | gbM | mCHH | gbM |
| AT3G08860 | UM  | UM   | UM  | UM  | UM  | UM  | UM   | UM  |
| AT3G08870 | UM  | UM   | UM  | UM  | UM  | UM  | UM   | UM  |

|           |     |      |     |     |     |     |      |     |
|-----------|-----|------|-----|-----|-----|-----|------|-----|
| AT3G08880 | UM  | UM   | UM  | UM  | UM  | UM  | UM   | UM  |
| AT3G08890 | UM  | UM   | UM  | UM  | UM  | UM  | UM   | UM  |
| AT3G08900 | UM  | UM   | UM  | UM  | UM  | UM  | UM   | UM  |
| AT3G08910 | UM  | UM   | UM  | UM  | UM  | UM  | mCHH | UM  |
| AT3G08920 | UM  | UM   | UM  | UM  | UM  | UM  | UM   | UM  |
| AT3G08930 | UM  | UM   | UM  | UM  | UM  | UM  | UM   | UM  |
| AT3G08940 | UM  | UM   | UM  | UM  | UM  | UM  | UM   | UM  |
| AT3G08943 | gbM | gbM  | gbM | gbM | gbM | gbM | gbM  | gbM |
| AT3G08947 | gbM | gbM  | gbM | gbM | gbM | gbM | gbM  | gbM |
| AT3G08950 | UM  | UM   | UM  | UM  | UM  | UM  | UM   | UM  |
| AT3G08960 | gbM | mCHH | gbM | gbM | gbM | gbM | mCHH | gbM |
| AT3G08970 | UM  | UM   | UM  | UM  | UM  | UM  | UM   | UM  |
| AT3G08980 | UM  | UM   | UM  | UM  | UM  | UM  | UM   | UM  |
| AT3G08990 | UM  | UM   | UM  | UM  | UM  | UM  | UM   | UM  |
| AT3G09000 | UM  | UM   | UM  | UM  | UM  | UM  | UM   | UM  |
| AT3G09010 | UM  | UM   | UM  | UM  | UM  | UM  | UM   | UM  |
| AT3G09020 | UM  | UM   | UM  | UM  | UM  | UM  | UM   | UM  |
| AT3G09030 | UM  | UM   | UM  | UM  | UM  | UM  | UM   | UM  |
| AT3G09032 | UM  | UM   | UM  | UM  | UM  | UM  | UM   | UM  |
| AT3G09035 | UM  | UM   | UM  | UM  | UM  | UM  | UM   | UM  |
| AT3G09040 | UM  | gbM  | UM  | UM  | UM  | UM  | UM   | UM  |
| AT3G09050 | UM  | UM   | UM  | UM  | UM  | UM  | UM   | UM  |
| AT3G09060 | UM  | UM   | UM  | UM  | UM  | UM  | UM   | UM  |
| AT3G09070 | UM  | UM   | UM  | UM  | UM  | UM  | UM   | UM  |
| AT3G09080 | UM  | UM   | UM  | UM  | UM  | UM  | UM   | UM  |
| AT3G09085 | UM  | UM   | UM  | UM  | UM  | UM  | UM   | UM  |
| AT3G09090 | gbM | mCHH | gbM | gbM | gbM | gbM | mCHH | gbM |
| AT3G09100 | gbM | gbM  | gbM | gbM | UM  | gbM | mCHH | UM  |
| AT3G09110 | UM  | UM   | UM  | UM  | UM  | UM  | UM   | UM  |
| AT3G09120 | UM  | UM   | UM  | UM  | UM  | UM  | UM   | UM  |
| AT3G09130 | UM  | UM   | UM  | UM  | UM  | UM  | UM   | UM  |
| AT3G09140 | UM  | UM   | UM  | UM  | UM  | UM  | mCHH | UM  |
| AT3G09150 | UM  | UM   | UM  | UM  | UM  | UM  | UM   | UM  |
| AT3G09160 | UM  | UM   | UM  | UM  | UM  | UM  | UM   | UM  |
| AT3G09162 | UM  | UM   | UM  | UM  | UM  | UM  | UM   | UM  |
| AT3G09180 | UM  | UM   | UM  | UM  | UM  | UM  | UM   | UM  |
| AT3G09190 | UM  | UM   | UM  | UM  | UM  | UM  | UM   | UM  |
| AT3G09200 | UM  | UM   | UM  | UM  | UM  | UM  | UM   | UM  |
| AT3G09210 | UM  | UM   | UM  | UM  | UM  | UM  | UM   | UM  |
| AT3G09220 | UM  | UM   | UM  | UM  | UM  | UM  | UM   | UM  |
| AT3G09230 | UM  | UM   | UM  | UM  | UM  | UM  | UM   | UM  |
| AT3G09240 | UM  | UM   | UM  | UM  | UM  | UM  | UM   | UM  |
| AT3G09250 | UM  | UM   | UM  | UM  | UM  | UM  | UM   | UM  |
| AT3G09260 | UM  | UM   | UM  | UM  | UM  | UM  | UM   | UM  |
| AT3G09270 | UM  | UM   | UM  | UM  | UM  | UM  | UM   | UM  |
| AT3G09280 | UM  | UM   | UM  | UM  | UM  | UM  | UM   | UM  |
| AT3G09290 | UM  | UM   | UM  | UM  | UM  | UM  | UM   | UM  |
| AT3G09300 | gbM | gbM  | gbM | gbM | UM  | gbM | gbM  | UM  |

|           |      |      |      |      |      |      |      |      |
|-----------|------|------|------|------|------|------|------|------|
| AT3G09310 | UM   |
| AT3G09320 | UM   |
| AT3G09330 | UM   |
| AT3G09340 | UM   |
| AT3G09350 | UM   |
| AT3G09360 | gbM  | gbM  | gbM  | gbM  | UM   | gbM  | mCHG | UM   |
| AT3G09370 | gbM  | gbM  | gbM  | UM   | gbM  | gbM  | gbM  | UM   |
| AT3G09380 | UM   |
| AT3G09390 | UM   |
| AT3G09400 | UM   |
| AT3G09405 | UM   | UM   | UM   | UM   | UM   | UM   | mCHH | UM   |
| AT3G09410 | UM   | UM   | UM   | UM   | UM   | UM   | mCHH | UM   |
| AT3G09430 | UM   |
| AT3G09440 | UM   | UM   | UM   | UM   | UM   | UM   | mCHH | UM   |
| AT3G09450 | UM   |
| AT3G09470 | UM   | UM   | UM   | UM   | UM   | UM   | mCHH | UM   |
| AT3G09480 | UM   |
| AT3G09490 | UM   |
| AT3G09500 | UM   |
| AT3G09510 | mCHH | mCHH | mCHH | mCHG | mCHH | mCHH | mCHH | mCHH |
| AT3G09520 | UM   |
| AT3G09530 | UM   |
| AT3G09540 | UM   |
| AT3G09550 | UM   |
| AT3G09560 | gbM  | gbM  | gbM  | gbM  | gbM  | gbM  | mCHH | gbM  |
| AT3G09570 | UM   |
| AT3G09580 | UM   |
| AT3G09590 | UM   |
| AT3G09600 | UM   |
| AT3G09620 | UM   | UM   | UM   | UM   | UM   | UM   | mCHG | UM   |
| AT3G09630 | UM   |
| AT3G09640 | UM   |
| AT3G09650 | UM   |
| AT3G09660 | UM   |
| AT3G09670 | UM   |
| AT3G09680 | UM   |
| AT3G09690 | UM   |
| AT3G09700 | UM   |
| AT3G09710 | UM   | gbM  | UM   | UM   | UM   | UM   | gbM  | UM   |
| AT3G09720 | gbM  |
| AT3G09730 | UM   |
| AT3G09735 | UM   |
| AT3G09740 | UM   |
| AT3G09750 | UM   |
| AT3G09760 | UM   |
| AT3G09770 | UM   |
| AT3G09780 | UM   |
| AT3G09790 | UM   | gbM  | UM   | UM   | UM   | UM   | UM   | UM   |

|           |      |      |     |     |     |     |      |     |
|-----------|------|------|-----|-----|-----|-----|------|-----|
| AT3G09800 | UM   | UM   | UM  | UM  | UM  | UM  | UM   | UM  |
| AT3G09810 | UM   | UM   | UM  | UM  | UM  | UM  | UM   | UM  |
| AT3G09820 | UM   | UM   | UM  | UM  | UM  | UM  | UM   | UM  |
| AT3G09830 | UM   | UM   | UM  | UM  | UM  | UM  | UM   | UM  |
| AT3G09840 | gbM  | gbM  | gbM | UM  | UM  | gbM | gbM  | UM  |
| AT3G09850 | UM   | gbM  | UM  | UM  | UM  | UM  | gbM  | UM  |
| AT3G09860 | UM   | UM   | UM  | UM  | UM  | UM  | UM   | UM  |
| AT3G09863 | UM   | UM   | UM  | UM  | UM  | UM  | UM   | UM  |
| AT3G09870 | UM   | UM   | UM  | UM  | UM  | UM  | UM   | UM  |
| AT3G09880 | UM   | UM   | UM  | UM  | UM  | UM  | mCHH | UM  |
| AT3G09890 | UM   | UM   | UM  | UM  | UM  | UM  | UM   | UM  |
| AT3G09900 | UM   | UM   | UM  | UM  | UM  | UM  | UM   | UM  |
| AT3G09910 | UM   | gbM  | UM  | UM  | UM  | UM  | UM   | UM  |
| AT3G09920 | gbM  | gbM  | gbM | gbM | gbM | gbM | gbM  | gbM |
| AT3G09922 | UM   | UM   | UM  | UM  | UM  | UM  | UM   | UM  |
| AT3G09925 | UM   | UM   | UM  | UM  | UM  | UM  | UM   | UM  |
| AT3G09930 | UM   | UM   | UM  | UM  | UM  | UM  | UM   | UM  |
| AT3G09940 | UM   | UM   | UM  | UM  | UM  | UM  | UM   | UM  |
| AT3G09950 | UM   | UM   | UM  | UM  | UM  | UM  | UM   | UM  |
| AT3G09960 | UM   | UM   | UM  | UM  | UM  | UM  | UM   | UM  |
| AT3G09970 | UM   | UM   | UM  | UM  | UM  | UM  | UM   | UM  |
| AT3G09975 | UM   | UM   | UM  | UM  | UM  | UM  | UM   | UM  |
| AT3G09980 | UM   | UM   | UM  | UM  | UM  | UM  | UM   | UM  |
| AT3G09990 | UM   | UM   | UM  | UM  | UM  | UM  | mCHH | UM  |
| AT3G10000 | UM   | UM   | UM  | UM  | UM  | UM  | mCHH | UM  |
| AT3G10010 | mCHH | mCHH | UM  | UM  | UM  | UM  | mCHH | UM  |
| AT3G10020 | UM   | UM   | UM  | UM  | UM  | UM  | UM   | UM  |
| AT3G10030 | UM   | UM   | UM  | UM  | UM  | UM  | UM   | UM  |
| AT3G10040 | UM   | UM   | UM  | UM  | UM  | UM  | UM   | UM  |
| AT3G10050 | UM   | UM   | UM  | UM  | UM  | UM  | UM   | UM  |
| AT3G10060 | UM   | UM   | UM  | UM  | UM  | UM  | UM   | UM  |
| AT3G10070 | UM   | UM   | UM  | UM  | UM  | UM  | UM   | UM  |
| AT3G10080 | UM   | UM   | UM  | UM  | UM  | UM  | UM   | UM  |
| AT3G10090 | UM   | UM   | UM  | UM  | UM  | UM  | UM   | UM  |
| AT3G10110 | UM   | UM   | UM  | UM  | UM  | UM  | UM   | UM  |
| AT3G10113 | UM   | UM   | UM  | UM  | UM  | UM  | UM   | UM  |
| AT3G10116 | UM   | UM   | UM  | UM  | UM  | UM  | UM   | UM  |
| AT3G10120 | UM   | UM   | UM  | UM  | UM  | UM  | UM   | UM  |
| AT3G10130 | UM   | UM   | UM  | UM  | UM  | UM  | UM   | UM  |
| AT3G10140 | UM   | UM   | UM  | UM  | UM  | UM  | UM   | UM  |
| AT3G10150 | UM   | UM   | UM  | UM  | UM  | UM  | UM   | UM  |
| AT3G10160 | gbM  | gbM  | gbM | gbM | gbM | gbM | mCHH | gbM |
| AT3G10180 | gbM  | mCHH | gbM | gbM | gbM | gbM | mCHH | gbM |
| AT3G10185 | UM   | UM   | UM  | UM  | UM  | UM  | UM   | UM  |
| AT3G10190 | UM   | UM   | UM  | UM  | UM  | UM  | UM   | UM  |
| AT3G10195 | UM   | UM   | UM  | UM  | UM  | UM  | UM   | UM  |
| AT3G10200 | UM   | UM   | UM  | UM  | UM  | UM  | UM   | UM  |
| AT3G10210 | UM   | UM   | UM  | UM  | UM  | UM  | UM   | UM  |

|           |     |     |     |     |     |     |      |     |
|-----------|-----|-----|-----|-----|-----|-----|------|-----|
| AT3G10220 | UM   | UM  |
| AT3G10230 | UM  | gbM | gbM | UM  | UM  | gbM | UM   | gbM |
| AT3G10240 | UM   | UM  |
| AT3G10250 | UM  | gbM | UM  | UM  | UM  | UM  | UM   | UM  |
| AT3G10260 | UM   | UM  |
| AT3G10270 | gbM | gbM | gbM | gbM | gbM | gbM | mCHH | gbM |
| AT3G10280 | UM   | UM  |
| AT3G10290 | UM   | UM  |
| AT3G10300 | UM   | UM  |
| AT3G10310 | UM   | UM  |
| AT3G10320 | UM   | UM  |
| AT3G10330 | UM   | UM  |
| AT3G10340 | UM   | UM  |
| AT3G10350 | UM   | UM  |
| AT3G10360 | UM   | UM  |
| AT3G10370 | gbM  | gbM |
| AT3G10380 | gbM  | gbM |
| AT3G10390 | gbM  | gbM |
| AT3G10400 | UM   | UM  |
| AT3G10405 | UM   | UM  |
| AT3G10410 | UM   | UM  |
| AT3G10420 | UM   | UM  |
| AT3G10430 | UM   | UM  |
| AT3G10439 | UM   | UM  |
| AT3G10440 | UM   | UM  |
| AT3G10450 | UM  | UM  | UM  | UM  | UM  | UM  | mCHH | UM  |
| AT3G10460 | UM   | UM  |
| AT3G10470 | UM   | UM  |
| AT3G10480 | UM   | UM  |
| AT3G10490 | UM  | gbM | gbM | UM  | UM  | UM  | gbM  | UM  |
| AT3G10500 | UM   | UM  |
| AT3G10510 | UM   | UM  |
| AT3G10520 | UM   | UM  |
| AT3G10525 | UM   | UM  |
| AT3G10526 | UM   | UM  |
| AT3G10530 | gbM | gbM | gbM | gbM | gbM | gbM | mCHH | gbM |
| AT3G10540 | UM   | UM  |
| AT3G10550 | UM   | UM  |
| AT3G10560 | UM   | UM  |
| AT3G10570 | UM   | UM  |
| AT3G10572 | UM   | UM  |
| AT3G10580 | UM   | UM  |
| AT3G10585 | UM   | UM  |
| AT3G10590 | UM   | UM  |
| AT3G10595 | UM   | UM  |
| AT3G10600 | UM   | UM  |
| AT3G10610 | UM   | UM  |
| AT3G10620 | UM   | UM  |







|           |      |      |      |     |     |      |      |      |
|-----------|------|------|------|-----|-----|------|------|------|
| AT3G11500 | UM   | UM   | UM   | UM  | UM  | UM   | UM   | UM   |
| AT3G11510 | UM   | UM   | UM   | UM  | UM  | UM   | UM   | UM   |
| AT3G11520 | UM   | UM   | UM   | UM  | UM  | UM   | UM   | UM   |
| AT3G11530 | UM   | gbM  | UM   | gbM | gbM | gbM  | gbM  | UM   |
| AT3G11540 | UM   | UM   | UM   | UM  | UM  | UM   | UM   | UM   |
| AT3G11550 | UM   | UM   | UM   | UM  | UM  | UM   | UM   | UM   |
| AT3G11560 | gbM  | gbM  | gbM  | UM  | UM  | UM   | mCHH | UM   |
| AT3G11570 | UM   | UM   | UM   | UM  | UM  | UM   | UM   | UM   |
| AT3G11580 | UM   | UM   | UM   | UM  | UM  | UM   | UM   | UM   |
| AT3G11590 | UM   | mCHH | UM   | UM  | UM  | UM   | mCHG | UM   |
| AT3G11591 | UM   | UM   | UM   | UM  | UM  | UM   | UM   | UM   |
| AT3G11600 | UM   | UM   | UM   | UM  | UM  | UM   | UM   | UM   |
| AT3G11620 | UM   | UM   | UM   | UM  | UM  | UM   | UM   | UM   |
| AT3G11630 | UM   | UM   | UM   | UM  | UM  | UM   | UM   | UM   |
| AT3G11640 | UM   | UM   | UM   | UM  | UM  | UM   | UM   | UM   |
| AT3G11650 | UM   | UM   | UM   | UM  | UM  | UM   | UM   | UM   |
| AT3G11660 | UM   | UM   | UM   | UM  | UM  | UM   | UM   | UM   |
| AT3G11670 | UM   | UM   | UM   | UM  | UM  | UM   | UM   | UM   |
| AT3G11680 | mCHG | mCHH | mCHH | gbM | UM  | mCHH | mCHH | mCHG |
| AT3G11690 | UM   | UM   | UM   | UM  | UM  | UM   | UM   | UM   |
| AT3G11700 | UM   | UM   | UM   | UM  | UM  | UM   | UM   | UM   |
| AT3G11710 | gbM  | gbM  | gbM  | UM  | UM  | UM   | gbM  | UM   |
| AT3G11720 | UM   | UM   | UM   | UM  | UM  | UM   | UM   | UM   |
| AT3G11730 | UM   | UM   | UM   | UM  | UM  | UM   | UM   | UM   |
| AT3G11740 | UM   | UM   | UM   | UM  | UM  | UM   | UM   | UM   |
| AT3G11745 | UM   | UM   | UM   | UM  | UM  | UM   | UM   | UM   |
| AT3G11750 | UM   | UM   | UM   | UM  | UM  | UM   | UM   | UM   |
| AT3G11760 | gbM  | gbM  | gbM  | gbM | gbM | gbM  | gbM  | gbM  |
| AT3G11770 | UM   | UM   | UM   | UM  | UM  | UM   | UM   | UM   |
| AT3G11773 | UM   | UM   | UM   | UM  | UM  | UM   | UM   | UM   |
| AT3G11780 | UM   | UM   | UM   | UM  | UM  | UM   | UM   | UM   |
| AT3G11800 | UM   | UM   | UM   | UM  | UM  | UM   | UM   | UM   |
| AT3G11810 | UM   | UM   | UM   | UM  | UM  | UM   | UM   | UM   |
| AT3G11820 | UM   | UM   | UM   | UM  | UM  | UM   | UM   | UM   |
| AT3G11825 | UM   | UM   | UM   | UM  | UM  | UM   | UM   | UM   |
| AT3G11830 | UM   | gbM  | UM   | UM  | UM  | UM   | gbM  | UM   |
| AT3G11840 | UM   | UM   | UM   | UM  | UM  | UM   | UM   | UM   |
| AT3G11850 | UM   | UM   | UM   | UM  | UM  | UM   | mCHH | UM   |
| AT3G11860 | UM   | UM   | UM   | UM  | UM  | UM   | UM   | UM   |
| AT3G11870 | UM   | UM   | UM   | UM  | UM  | UM   | UM   | UM   |
| AT3G11880 | UM   | UM   | UM   | UM  | UM  | UM   | UM   | UM   |
| AT3G11890 | gbM  | gbM  | gbM  | UM  | UM  | UM   | gbM  | UM   |
| AT3G11900 | UM   | UM   | UM   | UM  | UM  | UM   | UM   | UM   |
| AT3G11910 | UM   | gbM  | UM   | UM  | UM  | UM   | mCHH | UM   |
| AT3G11920 | UM   | UM   | UM   | UM  | UM  | UM   | UM   | UM   |
| AT3G11930 | UM   | UM   | UM   | UM  | UM  | UM   | UM   | UM   |
| AT3G11940 | UM   | UM   | UM   | UM  | UM  | UM   | UM   | UM   |
| AT3G11945 | mCHH | mCHH | mCHH | UM  | UM  | UM   | mCHH | UM   |

|           |      |      |      |      |      |      |      |      |
|-----------|------|------|------|------|------|------|------|------|
| AT3G11950 | gbM  | mCHH | mCHH | gbM  | gbM  | gbM  | mCHH | gbM  |
| AT3G11960 | gbM  | gbM  | gbM  | gbM  | gbM  | gbM  | mCHH | gbM  |
| AT3G11964 | gbM  | gbM  | gbM  | gbM  | gbM  | gbM  | mCHH | gbM  |
| AT3G11980 | UM   |
| AT3G11990 | mCHH | mCHH | mCHH | mCHG | mCHH | mCHH | mCHH | mCHG |
| AT3G12000 | UM   |
| AT3G12010 | gbM  | mCHH | gbM  | gbM  | gbM  | gbM  | mCHH | gbM  |
| AT3G12012 | UM   |
| AT3G12020 | UM   | gbM  | UM   | UM   | UM   | UM   | mCHH | UM   |
| AT3G12030 | UM   |
| AT3G12040 | UM   |
| AT3G12050 | UM   |
| AT3G12060 | UM   |
| AT3G12070 | UM   |
| AT3G12080 | gbM  | gbM  | gbM  | gbM  | UM   | UM   | gbM  | UM   |
| AT3G12090 | UM   |
| AT3G12100 | UM   |
| AT3G12110 | UM   |
| AT3G12120 | UM   |
| AT3G12130 | UM   |
| AT3G12140 | UM   | UM   | gbM  | UM   | UM   | UM   | mCHH | UM   |
| AT3G12145 | UM   |
| AT3G12150 | UM   |
| AT3G12160 | UM   |
| AT3G12170 | UM   |
| AT3G12180 | UM   |
| AT3G12190 | UM   | mCHH | mCHG | UM   | UM   | UM   | mCHH | UM   |
| AT3G12200 | UM   | UM   | UM   | UM   | gbM  | UM   | gbM  | UM   |
| AT3G12203 | UM   | UM   | UM   | UM   | UM   | UM   | mCHH | UM   |
| AT3G12210 | UM   |
| AT3G12220 | UM   |
| AT3G12230 | UM   |
| AT3G12240 | UM   |
| AT3G12250 | gbM  |
| AT3G12260 | UM   |
| AT3G12270 | UM   |
| AT3G12280 | gbM  |
| AT3G12290 | UM   |
| AT3G12300 | UM   |
| AT3G12320 | UM   |
| AT3G12340 | gbM  | gbM  | gbM  | gbM  | gbM  | gbM  | mCHH | UM   |
| AT3G12345 | UM   |
| AT3G12350 | UM   |
| AT3G12360 | gbM  |
| AT3G12370 | UM   |
| AT3G12380 | gbM  | gbM  | gbM  | gbM  | gbM  | gbM  | mCHH | gbM  |
| AT3G12390 | UM   |
| AT3G12400 | UM   |

|           |     |      |     |     |     |     |      |     |
|-----------|-----|------|-----|-----|-----|-----|------|-----|
| AT3G12410 | UM  | UM   | UM  | UM  | UM  | UM  | UM   | UM  |
| AT3G12420 | UM  | UM   | UM  | UM  | UM  | UM  | UM   | UM  |
| AT3G12430 | UM  | UM   | UM  | UM  | UM  | UM  | UM   | UM  |
| AT3G12440 | UM  | UM   | UM  | UM  | UM  | UM  | UM   | UM  |
| AT3G12460 | UM  | UM   | UM  | UM  | UM  | UM  | UM   | UM  |
| AT3G12470 | UM  | UM   | UM  | UM  | UM  | UM  | UM   | UM  |
| AT3G12480 | gbM | gbM  | gbM | gbM | gbM | gbM | gbM  | gbM |
| AT3G12490 | UM  | UM   | UM  | UM  | UM  | UM  | UM   | UM  |
| AT3G12500 | UM  | UM   | UM  | UM  | UM  | UM  | UM   | UM  |
| AT3G12510 | UM  | UM   | UM  | UM  | UM  | UM  | UM   | UM  |
| AT3G12520 | UM  | UM   | UM  | UM  | UM  | UM  | mCHH | UM  |
| AT3G12530 | UM  | UM   | UM  | UM  | UM  | UM  | UM   | UM  |
| AT3G12540 | UM  | UM   | UM  | UM  | UM  | UM  | UM   | UM  |
| AT3G12545 | UM  | UM   | UM  | UM  | UM  | UM  | UM   | UM  |
| AT3G12550 | UM  | UM   | UM  | UM  | UM  | UM  | UM   | UM  |
| AT3G12560 | UM  | UM   | UM  | UM  | UM  | UM  | UM   | UM  |
| AT3G12570 | gbM | gbM  | gbM | gbM | gbM | gbM | gbM  | gbM |
| AT3G12580 | UM  | UM   | UM  | UM  | UM  | UM  | UM   | UM  |
| AT3G12587 | UM  | UM   | UM  | UM  | UM  | UM  | UM   | UM  |
| AT3G12590 | gbM | gbM  | gbM | gbM | gbM | gbM | gbM  | gbM |
| AT3G12600 | UM  | UM   | UM  | UM  | UM  | UM  | UM   | UM  |
| AT3G12610 | UM  | UM   | UM  | UM  | UM  | UM  | UM   | UM  |
| AT3G12620 | UM  | UM   | UM  | UM  | UM  | UM  | UM   | UM  |
| AT3G12630 | UM  | UM   | UM  | UM  | UM  | UM  | UM   | UM  |
| AT3G12640 | UM  | UM   | UM  | gbM | gbM | UM  | UM   | UM  |
| AT3G12650 | UM  | UM   | UM  | UM  | UM  | UM  | UM   | UM  |
| AT3G12660 | UM  | UM   | UM  | UM  | UM  | UM  | UM   | UM  |
| AT3G12670 | UM  | mCHH | UM  | UM  | UM  | UM  | UM   | UM  |
| AT3G12680 | UM  | UM   | UM  | UM  | UM  | UM  | UM   | UM  |
| AT3G12685 | UM  | UM   | UM  | UM  | UM  | UM  | UM   | UM  |
| AT3G12690 | gbM | gbM  | gbM | gbM | gbM | gbM | gbM  | gbM |
| AT3G12700 | UM  | UM   | UM  | UM  | UM  | UM  | UM   | UM  |
| AT3G12710 | UM  | UM   | UM  | UM  | UM  | UM  | UM   | UM  |
| AT3G12720 | UM  | UM   | UM  | UM  | UM  | UM  | UM   | UM  |
| AT3G12730 | UM  | UM   | UM  | UM  | UM  | UM  | UM   | UM  |
| AT3G12740 | UM  | mCHH | UM  | UM  | UM  | UM  | UM   | UM  |
| AT3G12750 | UM  | UM   | UM  | UM  | UM  | UM  | UM   | UM  |
| AT3G12760 | UM  | UM   | UM  | UM  | UM  | UM  | UM   | UM  |
| AT3G12770 | UM  | UM   | UM  | UM  | UM  | UM  | UM   | UM  |
| AT3G12775 | UM  | UM   | UM  | UM  | UM  | UM  | UM   | UM  |
| AT3G12780 | UM  | UM   | UM  | UM  | UM  | UM  | UM   | UM  |
| AT3G12800 | UM  | UM   | UM  | UM  | UM  | UM  | mCHH | UM  |
| AT3G12810 | gbM | mCHH | gbM | gbM | gbM | gbM | mCHH | gbM |
| AT3G12820 | UM  | UM   | UM  | UM  | UM  | UM  | UM   | UM  |
| AT3G12830 | UM  | UM   | UM  | UM  | UM  | UM  | UM   | UM  |
| AT3G12835 | UM  | UM   | UM  | UM  | UM  | UM  | UM   | UM  |
| AT3G12840 | UM  | UM   | UM  | UM  | UM  | UM  | UM   | UM  |
| AT3G12850 | UM  | UM   | UM  | UM  | UM  | UM  | UM   | UM  |

|           |     |      |     |     |     |     |      |     |
|-----------|-----|------|-----|-----|-----|-----|------|-----|
| AT3G12860 | UM  | UM   | UM  | UM  | UM  | UM  | mCHH | UM  |
| AT3G12870 | UM  | UM   | UM  | UM  | UM  | UM  | UM   | UM  |
| AT3G12880 | UM  | UM   | UM  | UM  | UM  | UM  | UM   | UM  |
| AT3G12890 | UM  | UM   | UM  | UM  | UM  | UM  | UM   | UM  |
| AT3G12900 | UM  | UM   | UM  | UM  | UM  | UM  | UM   | UM  |
| AT3G12910 | UM  | UM   | UM  | UM  | UM  | UM  | UM   | UM  |
| AT3G12915 | UM  | UM   | UM  | UM  | UM  | UM  | UM   | UM  |
| AT3G12920 | UM  | UM   | UM  | UM  | UM  | UM  | UM   | UM  |
| AT3G12930 | UM  | UM   | UM  | UM  | UM  | UM  | UM   | UM  |
| AT3G12940 | UM  | gbM  | UM  | UM  | UM  | UM  | gbM  | UM  |
| AT3G12950 | UM  | UM   | UM  | UM  | UM  | UM  | UM   | UM  |
| AT3G12955 | UM  | UM   | UM  | UM  | UM  | UM  | UM   | UM  |
| AT3G12960 | UM  | UM   | UM  | UM  | UM  | UM  | UM   | UM  |
| AT3G12970 | UM  | UM   | UM  | UM  | UM  | UM  | UM   | UM  |
| AT3G12977 | UM  | UM   | UM  | UM  | UM  | UM  | UM   | UM  |
| AT3G12980 | gbM | mCHH | gbM | gbM | gbM | gbM | mCHH | gbM |
| AT3G12990 | UM  | UM   | UM  | UM  | UM  | UM  | UM   | UM  |
| AT3G13000 | UM  | UM   | UM  | UM  | UM  | UM  | UM   | UM  |
| AT3G13010 | UM  | UM   | UM  | UM  | UM  | UM  | UM   | UM  |
| AT3G13020 | UM  | gbM  | gbM | gbM | UM  | gbM | gbM  | gbM |
| AT3G13030 | UM  | UM   | UM  | UM  | UM  | UM  | UM   | UM  |
| AT3G13040 | UM  | UM   | UM  | UM  | UM  | UM  | UM   | UM  |
| AT3G13050 | UM  | UM   | UM  | UM  | UM  | UM  | UM   | UM  |
| AT3G13060 | gbM | gbM  | gbM | gbM | gbM | gbM | gbM  | gbM |
| AT3G13062 | UM  | UM   | UM  | UM  | UM  | UM  | UM   | UM  |
| AT3G13065 | gbM | mCHH | gbM | UM  | gbM | gbM | gbM  | gbM |
| AT3G13070 | UM  | UM   | UM  | UM  | UM  | UM  | UM   | UM  |
| AT3G13080 | UM  | UM   | UM  | UM  | UM  | UM  | UM   | UM  |
| AT3G13090 | UM  | UM   | UM  | UM  | UM  | UM  | mCHH | UM  |
| AT3G13100 | gbM | mCHH | gbM | gbM | gbM | gbM | gbM  | gbM |
| AT3G13110 | UM  | UM   | UM  | UM  | UM  | UM  | UM   | UM  |
| AT3G13120 | UM  | UM   | UM  | UM  | UM  | UM  | UM   | UM  |
| AT3G13130 | UM  | UM   | UM  | UM  | UM  | UM  | UM   | UM  |
| AT3G13140 | UM  | UM   | UM  | UM  | UM  | UM  | UM   | UM  |
| AT3G13150 | UM  | gbM  | UM  | UM  | UM  | gbM | UM   | gbM |
| AT3G13160 | UM  | UM   | UM  | UM  | UM  | UM  | UM   | UM  |
| AT3G13170 | UM  | UM   | UM  | UM  | UM  | UM  | UM   | UM  |
| AT3G13175 | UM  | UM   | UM  | UM  | UM  | UM  | UM   | UM  |
| AT3G13180 | UM  | UM   | UM  | UM  | UM  | UM  | UM   | UM  |
| AT3G13190 | UM  | UM   | UM  | UM  | UM  | UM  | UM   | UM  |
| AT3G13200 | UM  | UM   | UM  | UM  | UM  | UM  | UM   | UM  |
| AT3G13210 | UM  | UM   | UM  | UM  | UM  | UM  | UM   | UM  |
| AT3G13220 | UM  | UM   | UM  | UM  | UM  | UM  | mCHH | UM  |
| AT3G13222 | UM  | UM   | UM  | UM  | UM  | UM  | UM   | UM  |
| AT3G13224 | UM  | UM   | UM  | UM  | UM  | UM  | UM   | UM  |
| AT3G13225 | gbM | gbM  | gbM | gbM | gbM | gbM | mCHH | gbM |
| AT3G13226 | gbM | gbM  | gbM | gbM | gbM | UM  | gbM  | gbM |
| AT3G13227 | UM  | UM   | UM  | UM  | UM  | UM  | UM   | UM  |

|           |      |      |      |      |      |      |      |      |
|-----------|------|------|------|------|------|------|------|------|
| AT3G13228 | UM   | UM   | UM   | UM   | UM   | UM   | mCHH | UM   |
| AT3G13229 | UM   |
| AT3G13230 | UM   |
| AT3G13235 | UM   |
| AT3G13240 | UM   |
| AT3G13275 | UM   |
| AT3G13280 | UM   |
| AT3G13290 | UM   | UM   | UM   | UM   | UM   | UM   | mCHH | UM   |
| AT3G13300 | UM   | gbM  | gbM  | UM   | UM   | UM   | gbM  | UM   |
| AT3G13310 | UM   |
| AT3G13320 | UM   |
| AT3G13330 | gbM  | gbM  | gbM  | gbM  | gbM  | gbM  | mCHH | gbM  |
| AT3G13340 | UM   | gbM  | gbM  | gbM  | UM   | UM   | UM   | UM   |
| AT3G13350 | UM   |
| AT3G13360 | UM   | gbM  | UM   | gbM  | gbM  | UM   | gbM  | UM   |
| AT3G13370 | mCHH |
| AT3G13380 | UM   |
| AT3G13390 | UM   |
| AT3G13400 | UM   |
| AT3G13403 | UM   |
| AT3G13404 | UM   |
| AT3G13410 | UM   |
| AT3G13420 | UM   |
| AT3G13430 | UM   |
| AT3G13432 | UM   |
| AT3G13433 | UM   |
| AT3G13435 | UM   |
| AT3G13437 | UM   |
| AT3G13440 | UM   |
| AT3G13445 | UM   |
| AT3G13450 | UM   |
| AT3G13460 | UM   |
| AT3G13470 | UM   |
| AT3G13480 | UM   | UM   | UM   | UM   | UM   | UM   | mCHH | UM   |
| AT3G13490 | UM   |
| AT3G13500 | UM   |
| AT3G13510 | UM   |
| AT3G13520 | UM   |
| AT3G13530 | gbM  |
| AT3G13540 | UM   |
| AT3G13550 | UM   |
| AT3G13560 | UM   |
| AT3G13570 | UM   |
| AT3G13580 | gbM  | gbM  | UM   | UM   | UM   | UM   | mCHH | UM   |
| AT3G13590 | UM   |
| AT3G13594 | UM   |
| AT3G13600 | UM   |
| AT3G13610 | UM   |

|           |     |      |      |     |     |     |      |     |
|-----------|-----|------|------|-----|-----|-----|------|-----|
| AT3G13620 | gbM | gbM  | gbM  | UM  | gbM | gbM | gbM  | gbM |
| AT3G13630 | UM  | UM   | UM   | UM  | UM  | UM  | UM   | UM  |
| AT3G13640 | gbM | gbM  | gbM  | gbM | gbM | gbM | gbM  | gbM |
| AT3G13650 | UM  | UM   | UM   | UM  | UM  | UM  | UM   | UM  |
| AT3G13660 | UM  | UM   | UM   | UM  | UM  | UM  | UM   | UM  |
| AT3G13662 | UM  | mCHH | mCHH | UM  | UM  | UM  | mCHH | UM  |
| AT3G13670 | UM  | UM   | UM   | UM  | UM  | UM  | UM   | UM  |
| AT3G13672 | UM  | UM   | UM   | UM  | UM  | UM  | UM   | UM  |
| AT3G13674 | UM  | UM   | UM   | UM  | UM  | UM  | UM   | UM  |
| AT3G13677 | UM  | UM   | UM   | UM  | UM  | UM  | UM   | UM  |
| AT3G13680 | UM  | UM   | UM   | UM  | UM  | UM  | UM   | UM  |
| AT3G13682 | UM  | UM   | UM   | UM  | UM  | UM  | UM   | UM  |
| AT3G13686 | UM  | UM   | UM   | UM  | UM  | UM  | UM   | UM  |
| AT3G13690 | gbM | gbM  | gbM  | gbM | gbM | gbM | gbM  | gbM |
| AT3G13700 | UM  | UM   | UM   | UM  | UM  | UM  | UM   | UM  |
| AT3G13710 | UM  | UM   | UM   | UM  | UM  | UM  | UM   | UM  |
| AT3G13720 | UM  | UM   | UM   | UM  | UM  | UM  | UM   | UM  |
| AT3G13730 | UM  | UM   | UM   | UM  | UM  | UM  | UM   | UM  |
| AT3G13740 | UM  | UM   | UM   | UM  | UM  | UM  | UM   | UM  |
| AT3G13750 | gbM | gbM  | gbM  | gbM | gbM | gbM | gbM  | gbM |
| AT3G13760 | UM  | UM   | UM   | UM  | UM  | UM  | UM   | UM  |
| AT3G13770 | UM  | UM   | UM   | UM  | UM  | UM  | UM   | UM  |
| AT3G13772 | gbM | gbM  | gbM  | gbM | UM  | UM  | mCHH | gbM |
| AT3G13780 | UM  | UM   | mCHH | UM  | UM  | UM  | UM   | UM  |
| AT3G13782 | UM  | UM   | UM   | UM  | UM  | UM  | UM   | UM  |
| AT3G13784 | UM  | UM   | UM   | UM  | UM  | UM  | UM   | UM  |
| AT3G13790 | UM  | UM   | UM   | UM  | UM  | UM  | UM   | UM  |
| AT3G13800 | UM  | UM   | UM   | UM  | UM  | UM  | UM   | UM  |
| AT3G13810 | UM  | UM   | UM   | UM  | UM  | UM  | UM   | UM  |
| AT3G13820 | UM  | UM   | UM   | UM  | UM  | UM  | mCHH | UM  |
| AT3G13830 | UM  | UM   | UM   | UM  | UM  | UM  | UM   | UM  |
| AT3G13840 | gbM | mCHH | gbM  | gbM | UM  | UM  | gbM  | UM  |
| AT3G13845 | UM  | UM   | UM   | UM  | UM  | UM  | UM   | UM  |
| AT3G13850 | UM  | UM   | UM   | UM  | UM  | UM  | UM   | UM  |
| AT3G13857 | UM  | UM   | UM   | UM  | UM  | UM  | UM   | UM  |
| AT3G13860 | gbM | gbM  | gbM  | UM  | UM  | UM  | gbM  | UM  |
| AT3G13870 | gbM | gbM  | gbM  | gbM | gbM | gbM | mCHH | gbM |
| AT3G13880 | UM  | UM   | UM   | UM  | UM  | UM  | UM   | UM  |
| AT3G13882 | UM  | UM   | UM   | UM  | UM  | UM  | UM   | UM  |
| AT3G13890 | UM  | UM   | UM   | UM  | UM  | UM  | UM   | UM  |
| AT3G13898 | UM  | UM   | UM   | UM  | UM  | UM  | mCHH | UM  |
| AT3G13900 | UM  | UM   | UM   | UM  | UM  | UM  | mCHH | UM  |
| AT3G13910 | UM  | UM   | UM   | UM  | UM  | UM  | UM   | UM  |
| AT3G13920 | UM  | UM   | UM   | UM  | UM  | UM  | UM   | UM  |
| AT3G13930 | UM  | UM   | UM   | UM  | UM  | UM  | UM   | UM  |
| AT3G13940 | UM  | UM   | UM   | UM  | UM  | UM  | UM   | UM  |
| AT3G13950 | UM  | UM   | UM   | UM  | UM  | UM  | UM   | UM  |
| AT3G13960 | UM  | UM   | UM   | UM  | UM  | UM  | UM   | UM  |

|           |     |      |     |     |     |     |      |     |
|-----------|-----|------|-----|-----|-----|-----|------|-----|
| AT3G13970 | UM  | UM   | UM  | UM  | UM  | UM  | UM   | UM  |
| AT3G13980 | UM  | UM   | UM  | UM  | UM  | UM  | UM   | UM  |
| AT3G13990 | gbM | gbM  | gbM | gbM | gbM | gbM | gbM  | gbM |
| AT3G14000 | UM  | UM   | UM  | UM  | UM  | UM  | UM   | UM  |
| AT3G14010 | gbM | gbM  | gbM | gbM | gbM | gbM | gbM  | gbM |
| AT3G14020 | UM  | UM   | UM  | UM  | UM  | UM  | UM   | UM  |
| AT3G14030 | UM  | mCHH | UM  | UM  | UM  | UM  | UM   | UM  |
| AT3G14040 | UM  | UM   | UM  | UM  | UM  | UM  | UM   | UM  |
| AT3G14050 | UM  | UM   | UM  | UM  | UM  | UM  | UM   | UM  |
| AT3G14060 | UM  | UM   | UM  | UM  | UM  | UM  | UM   | UM  |
| AT3G14067 | UM  | UM   | UM  | UM  | UM  | UM  | UM   | UM  |
| AT3G14070 | UM  | UM   | UM  | UM  | UM  | UM  | UM   | UM  |
| AT3G14075 | gbM | gbM  | gbM | gbM | gbM | gbM | gbM  | gbM |
| AT3G14080 | UM  | UM   | UM  | UM  | UM  | UM  | UM   | UM  |
| AT3G14090 | UM  | UM   | UM  | UM  | UM  | UM  | UM   | UM  |
| AT3G14100 | UM  | gbM  | UM  | UM  | UM  | UM  | gbM  | UM  |
| AT3G14110 | UM  | UM   | UM  | UM  | UM  | UM  | UM   | UM  |
| AT3G14120 | gbM | mCHH | gbM | gbM | gbM | gbM | mCHH | gbM |
| AT3G14130 | UM  | gbM  | UM  | UM  | UM  | UM  | UM   | UM  |
| AT3G14140 | UM  | UM   | UM  | UM  | UM  | UM  | UM   | UM  |
| AT3G14150 | UM  | UM   | UM  | UM  | UM  | UM  | UM   | UM  |
| AT3G14160 | UM  | UM   | UM  | UM  | UM  | UM  | UM   | UM  |
| AT3G14170 | UM  | UM   | UM  | UM  | UM  | UM  | UM   | UM  |
| AT3G14172 | gbM | mCHH | gbM | gbM | gbM | gbM | mCHH | gbM |
| AT3G14180 | UM  | UM   | UM  | UM  | UM  | UM  | UM   | UM  |
| AT3G14190 | UM  | UM   | UM  | UM  | UM  | UM  | UM   | UM  |
| AT3G14200 | UM  | UM   | UM  | UM  | UM  | UM  | UM   | UM  |
| AT3G14205 | gbM | gbM  | gbM | UM  | gbM | UM  | mCHH | UM  |
| AT3G14210 | UM  | UM   | UM  | UM  | UM  | UM  | mCHH | UM  |
| AT3G14220 | UM  | UM   | UM  | UM  | UM  | UM  | UM   | UM  |
| AT3G14225 | UM  | UM   | UM  | UM  | UM  | UM  | UM   | UM  |
| AT3G14230 | UM  | UM   | UM  | UM  | UM  | UM  | UM   | UM  |
| AT3G14240 | UM  | UM   | UM  | UM  | UM  | UM  | UM   | UM  |
| AT3G14250 | UM  | UM   | UM  | UM  | UM  | UM  | UM   | UM  |
| AT3G14260 | UM  | UM   | UM  | UM  | UM  | UM  | UM   | UM  |
| AT3G14270 | gbM | mCHH | gbM | gbM | gbM | gbM | mCHH | gbM |
| AT3G14280 | UM  | UM   | UM  | UM  | UM  | UM  | UM   | UM  |
| AT3G14290 | UM  | UM   | UM  | UM  | UM  | UM  | UM   | UM  |
| AT3G14300 | UM  | UM   | UM  | UM  | UM  | UM  | UM   | UM  |
| AT3G14310 | UM  | UM   | UM  | UM  | UM  | UM  | UM   | UM  |
| AT3G14320 | UM  | UM   | UM  | UM  | UM  | UM  | UM   | UM  |
| AT3G14330 | UM  | UM   | UM  | UM  | UM  | UM  | UM   | UM  |
| AT3G14340 | UM  | UM   | UM  | UM  | UM  | UM  | UM   | UM  |
| AT3G14350 | UM  | gbM  | UM  | UM  | UM  | UM  | gbM  | UM  |
| AT3G14360 | UM  | UM   | UM  | UM  | UM  | UM  | UM   | UM  |
| AT3G14362 | UM  | UM   | UM  | UM  | UM  | UM  | UM   | UM  |
| AT3G14370 | UM  | UM   | UM  | UM  | UM  | UM  | UM   | UM  |
| AT3G14380 | UM  | UM   | UM  | UM  | UM  | UM  | mCHH | UM  |

|           |      |      |      |      |      |      |      |      |
|-----------|------|------|------|------|------|------|------|------|
| AT3G14390 | UM   |
| AT3G14395 | UM   |
| AT3G14400 | gbM  |
| AT3G14410 | UM   |
| AT3G14415 | UM   |
| AT3G14420 | UM   |
| AT3G14430 | UM   |
| AT3G14431 | UM   |
| AT3G14440 | UM   |
| AT3G14450 | UM   |
| AT3G14452 | UM   |
| AT3G14460 | UM   |
| AT3G14470 | UM   | gbM  | UM   | UM   | UM   | UM   | UM   | UM   |
| AT3G14480 | UM   |
| AT3G14490 | UM   |
| AT3G14510 | UM   |
| AT3G14520 | UM   |
| AT3G14530 | UM   |
| AT3G14540 | UM   |
| AT3G14550 | gbM  |
| AT3G14560 | UM   |
| AT3G14570 | UM   | gbM  | UM   | UM   | UM   | UM   | mCHH | UM   |
| AT3G14580 | UM   |
| AT3G14590 | UM   | UM   | UM   | UM   | UM   | UM   | mCHH | UM   |
| AT3G14595 | UM   |
| AT3G14600 | UM   |
| AT3G14610 | UM   |
| AT3G14620 | UM   |
| AT3G14630 | UM   | UM   | UM   | UM   | UM   | UM   | gbM  | UM   |
| AT3G14640 | UM   | gbM  | UM   | UM   | UM   | UM   | gbM  | UM   |
| AT3G14650 | gbM  |
| AT3G14660 | UM   | gbM  | UM   | UM   | UM   | UM   | UM   | UM   |
| AT3G14670 | mCHH |
| AT3G14680 | UM   |
| AT3G14690 | UM   |
| AT3G14700 | UM   |
| AT3G14710 | UM   |
| AT3G14720 | UM   |
| AT3G14730 | UM   |
| AT3G14740 | UM   |
| AT3G14750 | UM   |
| AT3G14760 | UM   |
| AT3G14770 | UM   |
| AT3G14780 | UM   |
| AT3G14790 | gbM  |
| AT3G14810 | UM   |
| AT3G14820 | UM   |
| AT3G14830 | UM   |



|           |     |      |     |     |     |     |      |     |
|-----------|-----|------|-----|-----|-----|-----|------|-----|
| AT3G14840 | UM  | UM   | UM  | UM  | UM  | UM  | mCHH | UM  |
| AT3G14850 | UM  | UM   | UM  | UM  | UM  | UM  | UM   | UM  |
| AT3G14860 | gbM | gbM  | gbM | gbM | gbM | gbM | gbM  | gbM |
| AT3G14870 | UM  | UM   | UM  | UM  | UM  | UM  | UM   | UM  |
| AT3G14880 | UM  | UM   | UM  | UM  | UM  | UM  | UM   | UM  |
| AT3G14890 | UM  | UM   | UM  | UM  | UM  | UM  | UM   | UM  |
| AT3G14900 | UM  | UM   | UM  | UM  | UM  | UM  | UM   | UM  |
| AT3G14910 | UM  | UM   | UM  | UM  | UM  | UM  | mCHH | UM  |
| AT3G14920 | UM  | UM   | UM  | UM  | UM  | UM  | UM   | UM  |
| AT3G14930 | UM  | UM   | UM  | UM  | UM  | UM  | UM   | UM  |
| AT3G14940 | UM  | UM   | UM  | UM  | UM  | UM  | UM   | UM  |
| AT3G14950 | UM  | UM   | UM  | UM  | UM  | UM  | UM   | UM  |
| AT3G14960 | UM  | UM   | UM  | UM  | UM  | UM  | UM   | UM  |
| AT3G14970 | UM  | UM   | UM  | UM  | UM  | UM  | UM   | UM  |
| AT3G14980 | UM  | gbM  | UM  | UM  | UM  | gbM | gbM  | UM  |
| AT3G14981 | UM  | UM   | UM  | UM  | UM  | UM  | UM   | UM  |
| AT3G14990 | UM  | UM   | UM  | UM  | UM  | UM  | UM   | UM  |
| AT3G15000 | UM  | UM   | UM  | UM  | UM  | UM  | UM   | UM  |
| AT3G15010 | UM  | UM   | UM  | UM  | UM  | UM  | UM   | UM  |
| AT3G15020 | UM  | UM   | UM  | UM  | UM  | UM  | UM   | UM  |
| AT3G15030 | UM  | UM   | UM  | UM  | UM  | UM  | UM   | UM  |
| AT3G15040 | UM  | UM   | UM  | UM  | UM  | UM  | UM   | UM  |
| AT3G15050 | UM  | UM   | UM  | UM  | UM  | UM  | UM   | UM  |
| AT3G15060 | UM  | UM   | UM  | UM  | UM  | UM  | UM   | UM  |
| AT3G15070 | gbM | gbM  | UM  | UM  | UM  | UM  | gbM  | UM  |
| AT3G15080 | UM  | UM   | UM  | UM  | UM  | UM  | UM   | UM  |
| AT3G15090 | UM  | UM   | UM  | UM  | UM  | UM  | UM   | UM  |
| AT3G15095 | UM  | UM   | UM  | UM  | UM  | UM  | mCHH | UM  |
| AT3G15110 | UM  | UM   | UM  | UM  | UM  | UM  | UM   | UM  |
| AT3G15111 | UM  | UM   | UM  | UM  | UM  | UM  | UM   | UM  |
| AT3G15115 | UM  | UM   | UM  | UM  | UM  | UM  | mCHH | UM  |
| AT3G15120 | gbM | mCHH | gbM | gbM | gbM | gbM | mCHH | gbM |
| AT3G15130 | UM  | gbM  | UM  | UM  | UM  | UM  | gbM  | UM  |
| AT3G15140 | UM  | UM   | UM  | UM  | UM  | UM  | mCHH | UM  |
| AT3G15150 | UM  | UM   | UM  | UM  | UM  | UM  | UM   | UM  |
| AT3G15160 | UM  | UM   | UM  | UM  | UM  | UM  | UM   | UM  |
| AT3G15170 | UM  | UM   | UM  | UM  | UM  | UM  | UM   | UM  |
| AT3G15180 | gbM | gbM  | gbM | UM  | UM  | UM  | mCHH | UM  |
| AT3G15190 | UM  | UM   | UM  | UM  | UM  | UM  | UM   | UM  |
| AT3G15200 | UM  | UM   | UM  | UM  | UM  | UM  | UM   | UM  |
| AT3G15210 | UM  | UM   | UM  | UM  | UM  | UM  | UM   | UM  |
| AT3G15220 | gbM | gbM  | gbM | gbM | gbM | gbM | gbM  | gbM |
| AT3G15240 | UM  | UM   | UM  | UM  | UM  | UM  | UM   | UM  |
| AT3G15250 | UM  | UM   | UM  | UM  | UM  | UM  | UM   | UM  |
| AT3G15251 | UM  | UM   | UM  | UM  | UM  | UM  | UM   | UM  |
| AT3G15260 | UM  | UM   | UM  | UM  | UM  | UM  | UM   | UM  |
| AT3G15270 | UM  | UM   | UM  | UM  | UM  | UM  | UM   | UM  |
| AT3G15280 | UM  | UM   | UM  | UM  | UM  | UM  | UM   | UM  |





|           |     |     |     |     |     |     |      |     |
|-----------|-----|-----|-----|-----|-----|-----|------|-----|
| AT3G16120 | UM   | UM  |
| AT3G16130 | UM   | UM  |
| AT3G16140 | UM   | UM  |
| AT3G16150 | UM   | UM  |
| AT3G16160 | UM   | UM  |
| AT3G16170 | UM  | gbM | gbM | UM  | UM  | UM  | gbM  | UM  |
| AT3G16175 | UM   | UM  |
| AT3G16180 | UM   | UM  |
| AT3G16190 | UM   | UM  |
| AT3G16200 | UM   | UM  |
| AT3G16210 | UM   | UM  |
| AT3G16220 | UM   | UM  |
| AT3G16230 | UM   | UM  |
| AT3G16240 | UM   | UM  |
| AT3G16250 | UM   | UM  |
| AT3G16260 | gbM | gbM | gbM | UM  | gbM | UM  | gbM  | UM  |
| AT3G16270 | gbM  | gbM |
| AT3G16280 | UM   | UM  |
| AT3G16290 | gbM | gbM | gbM | UM  | UM  | UM  | gbM  | UM  |
| AT3G16300 | UM   | UM  |
| AT3G16310 | UM   | UM  |
| AT3G16320 | gbM | gbM | gbM | UM  | gbM | gbM | gbM  | gbM |
| AT3G16330 | UM   | UM  |
| AT3G16340 | UM  | UM  | UM  | UM  | UM  | UM  | mCHH | UM  |
| AT3G16350 | UM   | UM  |
| AT3G16360 | UM   | UM  |
| AT3G16370 | UM   | UM  |
| AT3G16380 | UM   | UM  |
| AT3G16390 | UM   | UM  |
| AT3G16400 | UM   | UM  |
| AT3G16410 | UM   | UM  |
| AT3G16420 | UM   | UM  |
| AT3G16430 | UM   | UM  |
| AT3G16432 | UM   | UM  |
| AT3G16440 | UM   | UM  |
| AT3G16450 | UM   | UM  |
| AT3G16460 | UM   | UM  |
| AT3G16470 | UM   | UM  |
| AT3G16480 | gbM  | gbM |
| AT3G16490 | UM   | UM  |
| AT3G16500 | UM  | UM  | UM  | UM  | UM  | UM  | mCHH | UM  |
| AT3G16510 | UM   | UM  |
| AT3G16520 | UM   | UM  |
| AT3G16530 | UM   | UM  |
| AT3G16540 | UM   | UM  |
| AT3G16550 | UM   | UM  |
| AT3G16555 | UM   | UM  |
| AT3G16560 | gbM | gbM | UM  | UM  | UM  | UM  | gbM  | gbM |

|           |      |      |      |      |      |      |      |      |
|-----------|------|------|------|------|------|------|------|------|
| AT3G16565 | UM   |
| AT3G16570 | UM   |
| AT3G16580 | UM   |
| AT3G16590 | UM   | UM   | UM   | UM   | UM   | UM   | mCHH | UM   |
| AT3G16600 | UM   |
| AT3G16610 | UM   |
| AT3G16620 | gbM  | gbM  | gbM  | gbM  | gbM  | gbM  | mCHH | gbM  |
| AT3G16630 | UM   | gbM  | UM   | UM   | UM   | UM   | mCHH | UM   |
| AT3G16640 | UM   |
| AT3G16650 | UM   |
| AT3G16660 | UM   |
| AT3G16670 | UM   |
| AT3G16680 | mCHH | mCHH | mCHH | mCHG | mCHH | mCHH | mCHH | mCHH |
| AT3G16690 | UM   | UM   | UM   | UM   | UM   | UM   | mCHH | UM   |
| AT3G16700 | UM   |
| AT3G16710 | UM   | gbM  | UM   | UM   | UM   | UM   | gbM  | UM   |
| AT3G16712 | UM   |
| AT3G16720 | UM   |
| AT3G16730 | gbM  | mCHH | gbM  | UM   | UM   | UM   | mCHH | UM   |
| AT3G16740 | UM   | UM   | UM   | UM   | UM   | UM   | mCHH | UM   |
| AT3G16750 | UM   |
| AT3G16760 | UM   |
| AT3G16770 | UM   |
| AT3G16780 | UM   |
| AT3G16785 | gbM  | gbM  | gbM  | gbM  | UM   | gbM  | gbM  | gbM  |
| AT3G16800 | UM   |
| AT3G16810 | UM   | UM   | UM   | UM   | UM   | UM   | gbM  | UM   |
| AT3G16820 | mCHH |
| AT3G16830 | gbM  |
| AT3G16840 | gbM  |
| AT3G16850 | UM   |
| AT3G16851 | UM   |
| AT3G16857 | UM   | gbM  | gbM  | gbM  | gbM  | UM   | gbM  | gbM  |
| AT3G16860 | UM   |
| AT3G16870 | UM   |
| AT3G16880 | UM   | mCHH | mCHG | UM   | UM   | UM   | mCHH | mCHG |
| AT3G16890 | UM   |
| AT3G16895 | UM   |
| AT3G16900 | UM   |
| AT3G16910 | UM   |
| AT3G16920 | UM   |
| AT3G16930 | UM   |
| AT3G16940 | gbM  | gbM  | gbM  | gbM  | gbM  | gbM  | mCHH | gbM  |
| AT3G16950 | UM   | mCHH | UM   | UM   | UM   | UM   | mCHH | UM   |
| AT3G16960 | UM   |
| AT3G16970 | UM   |
| AT3G16980 | UM   |
| AT3G16990 | UM   |

|           |      |      |      |      |      |      |      |      |
|-----------|------|------|------|------|------|------|------|------|
| AT3G17000 | UM   |
| AT3G17010 | UM   |
| AT3G17020 | UM   |
| AT3G17030 | UM   | UM   | UM   | UM   | UM   | UM   | mCHH | UM   |
| AT3G17040 | UM   |
| AT3G17060 | UM   |
| AT3G17070 | UM   |
| AT3G17080 | UM   |
| AT3G17090 | UM   |
| AT3G17100 | UM   |
| AT3G17120 | UM   |
| AT3G17130 | UM   |
| AT3G17140 | UM   |
| AT3G17150 | UM   |
| AT3G17152 | UM   |
| AT3G17155 | UM   |
| AT3G17160 | UM   |
| AT3G17170 | UM   |
| AT3G17180 | UM   |
| AT3G17190 | mCHH |
| AT3G17205 | gbM  |
| AT3G17210 | UM   |
| AT3G17220 | UM   |
| AT3G17225 | UM   |
| AT3G17230 | UM   | UM   | UM   | UM   | UM   | UM   | mCHH | UM   |
| AT3G17240 | UM   |
| AT3G17250 | UM   |
| AT3G17261 | UM   |
| AT3G17265 | UM   | mCHH | UM   | UM   | UM   | UM   | mCHH | UM   |
| AT3G17270 | UM   |
| AT3G17280 | UM   |
| AT3G17300 | UM   |
| AT3G17310 | gbM  |
| AT3G17320 | mCHH | mCHH | mCHH | mCHG | UM   | UM   | mCHH | UM   |
| AT3G17330 | gbM  | gbM  | gbM  | gbM  | gbM  | gbM  | mCHH | gbM  |
| AT3G17340 | gbM  |
| AT3G17350 | UM   |
| AT3G17360 | UM   | UM   | UM   | UM   | UM   | UM   | mCHH | UM   |
| AT3G17365 | UM   |
| AT3G17370 | UM   |
| AT3G17380 | UM   | UM   | UM   | UM   | UM   | UM   | mCHH | UM   |
| AT3G17390 | UM   |
| AT3G17400 | mCHH |
| AT3G17410 | gbM  | gbM  | gbM  | UM   | gbM  | gbM  | gbM  | gbM  |
| AT3G17420 | UM   | mCHH | UM   | UM   | UM   | UM   | mCHH | UM   |
| AT3G17430 | gbM  | UM   |
| AT3G17440 | UM   | UM   | UM   | UM   | gbM  | UM   | UM   | UM   |
| AT3G17450 | gbM  | gbM  | gbM  | gbM  | gbM  | gbM  | mCHH | gbM  |



|           |     |      |     |     |     |     |      |     |
|-----------|-----|------|-----|-----|-----|-----|------|-----|
| AT3G17880 | UM  | UM   | UM  | UM  | UM  | UM  | UM   | UM  |
| AT3G17890 | UM  | UM   | UM  | UM  | UM  | UM  | UM   | UM  |
| AT3G17900 | gbM | gbM  | gbM | gbM | gbM | gbM | gbM  | gbM |
| AT3G17910 | UM  | UM   | UM  | UM  | UM  | UM  | UM   | UM  |
| AT3G17920 | UM  | UM   | UM  | UM  | UM  | UM  | mCHH | UM  |
| AT3G17930 | UM  | UM   | UM  | UM  | UM  | UM  | UM   | UM  |
| AT3G17940 | UM  | UM   | UM  | UM  | UM  | UM  | UM   | UM  |
| AT3G17950 | UM  | UM   | UM  | UM  | UM  | UM  | UM   | UM  |
| AT3G17970 | gbM | gbM  | UM  | UM  | UM  | UM  | UM   | UM  |
| AT3G17980 | UM  | UM   | UM  | UM  | UM  | UM  | UM   | UM  |
| AT3G17998 | UM  | UM   | UM  | UM  | UM  | UM  | UM   | UM  |
| AT3G18000 | UM  | UM   | UM  | UM  | UM  | UM  | UM   | UM  |
| AT3G18010 | UM  | UM   | UM  | UM  | UM  | UM  | UM   | UM  |
| AT3G18020 | UM  | UM   | UM  | UM  | UM  | UM  | UM   | UM  |
| AT3G18030 | UM  | UM   | UM  | UM  | UM  | UM  | UM   | UM  |
| AT3G18035 | UM  | UM   | UM  | UM  | UM  | UM  | UM   | UM  |
| AT3G18040 | gbM | gbM  | gbM | gbM | gbM | gbM | mCHH | gbM |
| AT3G18050 | UM  | UM   | UM  | UM  | UM  | UM  | UM   | UM  |
| AT3G18060 | UM  | UM   | UM  | UM  | UM  | UM  | UM   | UM  |
| AT3G18070 | UM  | UM   | UM  | UM  | UM  | UM  | UM   | UM  |
| AT3G18080 | UM  | UM   | UM  | UM  | UM  | UM  | UM   | UM  |
| AT3G18090 | UM  | UM   | UM  | UM  | UM  | UM  | gbM  | UM  |
| AT3G18100 | gbM | mCHH | gbM | gbM | gbM | gbM | mCHH | gbM |
| AT3G18110 | UM  | mCHH | UM  | UM  | UM  | UM  | UM   | UM  |
| AT3G18120 | UM  | UM   | UM  | UM  | UM  | UM  | UM   | UM  |
| AT3G18130 | UM  | UM   | UM  | UM  | UM  | UM  | UM   | UM  |
| AT3G18140 | UM  | UM   | UM  | UM  | UM  | UM  | UM   | UM  |
| AT3G18150 | UM  | UM   | UM  | UM  | UM  | UM  | UM   | UM  |
| AT3G18160 | UM  | UM   | UM  | UM  | UM  | UM  | UM   | UM  |
| AT3G18165 | UM  | UM   | UM  | UM  | UM  | UM  | UM   | UM  |
| AT3G18170 | UM  | UM   | UM  | UM  | UM  | UM  | UM   | UM  |
| AT3G18180 | UM  | UM   | UM  | UM  | UM  | UM  | UM   | UM  |
| AT3G18190 | UM  | UM   | UM  | UM  | UM  | UM  | UM   | UM  |
| AT3G18200 | UM  | UM   | UM  | UM  | UM  | UM  | UM   | UM  |
| AT3G18210 | UM  | UM   | UM  | UM  | UM  | UM  | UM   | UM  |
| AT3G18215 | UM  | gbM  | UM  | UM  | UM  | UM  | mCHH | gbM |
| AT3G18220 | UM  | UM   | UM  | UM  | UM  | UM  | UM   | UM  |
| AT3G18230 | UM  | UM   | UM  | UM  | UM  | UM  | UM   | UM  |
| AT3G18235 | UM  | UM   | UM  | UM  | UM  | UM  | UM   | UM  |
| AT3G18240 | UM  | UM   | UM  | UM  | UM  | UM  | UM   | UM  |
| AT3G18250 | UM  | UM   | UM  | UM  | UM  | UM  | UM   | UM  |
| AT3G18260 | UM  | UM   | UM  | UM  | UM  | UM  | UM   | UM  |
| AT3G18270 | UM  | UM   | UM  | UM  | UM  | UM  | UM   | UM  |
| AT3G18280 | UM  | UM   | UM  | UM  | UM  | UM  | UM   | UM  |
| AT3G18282 | UM  | UM   | UM  | UM  | UM  | UM  | UM   | UM  |
| AT3G18290 | gbM | gbM  | gbM | gbM | gbM | gbM | mCHH | gbM |
| AT3G18291 | UM  | UM   | UM  | UM  | UM  | UM  | UM   | UM  |
| AT3G18295 | UM  | UM   | UM  | UM  | UM  | UM  | UM   | UM  |



|           |      |      |      |      |      |      |      |      |
|-----------|------|------|------|------|------|------|------|------|
| AT3G18300 | UM   |
| AT3G18310 | gbM  | gbM  | UM   | gbM  | UM   | UM   | gbM  | UM   |
| AT3G18320 | UM   |
| AT3G18330 | UM   |
| AT3G18340 | mCHH |
| AT3G18350 | gbM  |
| AT3G18360 | UM   |
| AT3G18370 | gbM  | gbM  | gbM  | gbM  | gbM  | gbM  | mCHH | gbM  |
| AT3G18380 | gbM  |
| AT3G18390 | UM   |
| AT3G18400 | UM   |
| AT3G18410 | UM   | UM   | UM   | UM   | UM   | UM   | mCHH | UM   |
| AT3G18420 | UM   |
| AT3G18430 | UM   |
| AT3G18440 | UM   | UM   | UM   | UM   | UM   | UM   | gbM  | UM   |
| AT3G18450 | UM   |
| AT3G18460 | UM   |
| AT3G18470 | UM   |
| AT3G18480 | gbM  | gbM  | UM   | UM   | UM   | UM   | mCHH | gbM  |
| AT3G18485 | UM   |
| AT3G18490 | UM   |
| AT3G18500 | UM   |
| AT3G18510 | UM   |
| AT3G18518 | UM   |
| AT3G18520 | gbM  |
| AT3G18524 | gbM  | gbM  | gbM  | gbM  | gbM  | gbM  | mCHH | gbM  |
| AT3G18530 | UM   |
| AT3G18535 | UM   |
| AT3G18550 | UM   | UM   | UM   | UM   | UM   | UM   | mCHH | UM   |
| AT3G18560 | UM   |
| AT3G18570 | UM   |
| AT3G18580 | UM   |
| AT3G18590 | UM   |
| AT3G18600 | UM   | mCHH | UM   | UM   | UM   | UM   | mCHH | UM   |
| AT3G18610 | UM   |
| AT3G18620 | UM   |
| AT3G18630 | mCHG | UM   | UM   | UM   | UM   | UM   | mCHG | UM   |
| AT3G18640 | gbM  | mCHH | gbM  | UM   | UM   | UM   | mCHH | UM   |
| AT3G18650 | UM   |
| AT3G18660 | UM   |
| AT3G18670 | UM   |
| AT3G18680 | UM   | UM   | UM   | UM   | UM   | UM   | mCHH | UM   |
| AT3G18690 | UM   |
| AT3G18700 | mCHH | mCHH | mCHH | mCHG | mCHG | mCHH | mCHH | mCHG |
| AT3G18710 | UM   |
| AT3G18715 | UM   |
| AT3G18720 | UM   |
| AT3G18730 | UM   | mCHH | UM   | UM   | UM   | UM   | UM   | UM   |

|           |      |      |     |     |     |     |      |     |
|-----------|------|------|-----|-----|-----|-----|------|-----|
| AT3G18740 | mCHH | UM   | UM  | UM  | UM  | UM  | UM   | UM  |
| AT3G18750 | UM   | gbM  | UM  | UM  | UM  | UM  | UM   | UM  |
| AT3G18760 | UM   | UM   | UM  | UM  | UM  | UM  | UM   | UM  |
| AT3G18770 | gbM  | gbM  | gbM | gbM | gbM | gbM | gbM  | gbM |
| AT3G18773 | UM   | UM   | UM  | UM  | UM  | UM  | UM   | UM  |
| AT3G18779 | UM   | UM   | UM  | UM  | UM  | UM  | UM   | UM  |
| AT3G18780 | UM   | UM   | UM  | UM  | UM  | UM  | UM   | UM  |
| AT3G18790 | UM   | UM   | UM  | UM  | UM  | UM  | UM   | UM  |
| AT3G18800 | UM   | UM   | UM  | UM  | UM  | UM  | UM   | UM  |
| AT3G18810 | UM   | UM   | UM  | UM  | UM  | UM  | UM   | UM  |
| AT3G18820 | UM   | UM   | UM  | UM  | UM  | UM  | UM   | UM  |
| AT3G18830 | UM   | UM   | UM  | UM  | UM  | UM  | UM   | UM  |
| AT3G18840 | UM   | UM   | UM  | UM  | UM  | UM  | UM   | UM  |
| AT3G18850 | UM   | UM   | UM  | UM  | UM  | UM  | UM   | UM  |
| AT3G18860 | gbM  | gbM  | gbM | UM  | gbM | gbM | gbM  | UM  |
| AT3G18870 | UM   | UM   | UM  | UM  | UM  | UM  | UM   | UM  |
| AT3G18880 | UM   | UM   | UM  | UM  | UM  | UM  | UM   | UM  |
| AT3G18890 | UM   | UM   | UM  | UM  | UM  | UM  | UM   | UM  |
| AT3G18900 | UM   | UM   | UM  | UM  | UM  | UM  | mCHH | UM  |
| AT3G18910 | UM   | mCHH | UM  | UM  | UM  | UM  | UM   | UM  |
| AT3G18930 | UM   | UM   | UM  | UM  | UM  | UM  | UM   | UM  |
| AT3G18940 | UM   | UM   | UM  | UM  | UM  | UM  | UM   | UM  |
| AT3G18950 | UM   | UM   | UM  | UM  | UM  | UM  | UM   | UM  |
| AT3G18957 | UM   | UM   | UM  | UM  | UM  | UM  | UM   | UM  |
| AT3G18960 | UM   | UM   | UM  | UM  | UM  | UM  | UM   | UM  |
| AT3G18970 | UM   | UM   | UM  | UM  | UM  | UM  | UM   | UM  |
| AT3G18980 | UM   | UM   | UM  | UM  | UM  | UM  | UM   | UM  |
| AT3G18990 | UM   | UM   | UM  | UM  | UM  | UM  | UM   | UM  |
| AT3G19000 | UM   | UM   | UM  | UM  | UM  | UM  | UM   | UM  |
| AT3G19010 | UM   | UM   | UM  | UM  | UM  | UM  | UM   | UM  |
| AT3G19020 | UM   | UM   | UM  | UM  | UM  | UM  | UM   | UM  |
| AT3G19030 | UM   | UM   | UM  | UM  | UM  | UM  | UM   | UM  |
| AT3G19035 | UM   | UM   | UM  | UM  | UM  | UM  | UM   | UM  |
| AT3G19040 | UM   | UM   | UM  | UM  | UM  | UM  | mCHH | UM  |
| AT3G19050 | mCHH | mCHH | gbM | gbM | UM  | gbM | mCHH | gbM |
| AT3G19055 | UM   | UM   | UM  | UM  | UM  | UM  | UM   | UM  |
| AT3G19070 | UM   | UM   | UM  | UM  | UM  | UM  | UM   | UM  |
| AT3G19080 | UM   | UM   | UM  | UM  | UM  | UM  | UM   | UM  |
| AT3G19085 | UM   | UM   | UM  | UM  | UM  | UM  | UM   | UM  |
| AT3G19090 | UM   | UM   | UM  | UM  | UM  | UM  | UM   | UM  |
| AT3G19100 | UM   | UM   | UM  | UM  | UM  | UM  | UM   | UM  |
| AT3G19120 | UM   | UM   | UM  | UM  | UM  | UM  | UM   | UM  |
| AT3G19130 | UM   | UM   | UM  | UM  | UM  | UM  | UM   | UM  |
| AT3G19140 | UM   | UM   | UM  | UM  | UM  | UM  | UM   | UM  |
| AT3G19150 | UM   | UM   | UM  | UM  | UM  | UM  | UM   | UM  |
| AT3G19160 | UM   | UM   | UM  | UM  | UM  | UM  | UM   | UM  |
| AT3G19170 | UM   | gbM  | UM  | UM  | UM  | UM  | mCHH | UM  |
| AT3G19180 | UM   | UM   | UM  | UM  | UM  | UM  | UM   | UM  |



|           |      |      |      |      |      |      |      |      |
|-----------|------|------|------|------|------|------|------|------|
| AT3G19610 | mCHH | UM   |
| AT3G19615 | UM   |
| AT3G19620 | UM   |
| AT3G19630 | UM   |
| AT3G19640 | UM   |
| AT3G19650 | UM   |
| AT3G19660 | UM   |
| AT3G19663 | UM   |
| AT3G19670 | gbM  | gbM  | gbM  | gbM  | gbM  | gbM  | mCHH | gbM  |
| AT3G19680 | UM   |
| AT3G19690 | UM   |
| AT3G19700 | UM   |
| AT3G19710 | UM   |
| AT3G19720 | UM   |
| AT3G19740 | gbM  | mCHH | gbM  | gbM  | gbM  | gbM  | mCHH | gbM  |
| AT3G19760 | UM   |
| AT3G19770 | UM   | UM   | UM   | UM   | UM   | UM   | mCHH | UM   |
| AT3G19780 | gbM  |
| AT3G19790 | UM   |
| AT3G19800 | UM   |
| AT3G19810 | UM   |
| AT3G19820 | UM   |
| AT3G19830 | gbM  | gbM  | gbM  | gbM  | UM   | gbM  | gbM  | UM   |
| AT3G19840 | gbM  | mCHH | gbM  | gbM  | gbM  | gbM  | gbM  | gbM  |
| AT3G19850 | UM   | UM   | UM   | UM   | UM   | UM   | mCHH | UM   |
| AT3G19860 | UM   |
| AT3G19870 | gbM  | gbM  | gbM  | UM   | UM   | UM   | mCHH | UM   |
| AT3G19880 | mCHH | mCHH | mCHH | gbM  | UM   | mCHH | mCHH | gbM  |
| AT3G19890 | UM   | gbM  | UM   | UM   | UM   | UM   | mCHH | UM   |
| AT3G19895 | UM   |
| AT3G19900 | gbM  |
| AT3G19910 | UM   |
| AT3G19920 | UM   |
| AT3G19930 | UM   |
| AT3G19940 | UM   |
| AT3G19950 | UM   |
| AT3G19960 | gbM  | gbM  | gbM  | UM   | UM   | UM   | mCHH | gbM  |
| AT3G19970 | gbM  |
| AT3G19980 | gbM  |
| AT3G19990 | UM   |
| AT3G20000 | UM   |
| AT3G20010 | gbM  |
| AT3G20015 | UM   |
| AT3G20020 | UM   |
| AT3G20030 | mCHH |
| AT3G20040 | UM   | gbM  | UM   | UM   | UM   | UM   | UM   | UM   |
| AT3G20050 | UM   | gbM  | UM   | gbM  | gbM  | UM   | gbM  | gbM  |
| AT3G20060 | UM   |

|           |      |      |      |     |     |     |      |     |
|-----------|------|------|------|-----|-----|-----|------|-----|
| AT3G20070 | UM   | UM   | UM   | UM  | UM  | UM  | mCHH | UM  |
| AT3G20080 | UM   | UM   | UM   | UM  | UM  | UM  | mCHH | UM  |
| AT3G20090 | UM   | UM   | UM   | UM  | UM  | UM  | UM   | UM  |
| AT3G20100 | UM   | UM   | UM   | UM  | UM  | UM  | UM   | UM  |
| AT3G20110 | UM   | UM   | UM   | UM  | UM  | UM  | UM   | UM  |
| AT3G20120 | UM   | UM   | UM   | UM  | UM  | UM  | UM   | UM  |
| AT3G20130 | UM   | UM   | UM   | UM  | UM  | UM  | UM   | UM  |
| AT3G20140 | UM   | UM   | UM   | UM  | UM  | UM  | UM   | UM  |
| AT3G20150 | UM   | UM   | UM   | UM  | UM  | UM  | mCHH | UM  |
| AT3G20155 | UM   | UM   | UM   | UM  | UM  | UM  | UM   | UM  |
| AT3G20160 | UM   | UM   | UM   | UM  | UM  | UM  | UM   | UM  |
| AT3G20170 | UM   | UM   | UM   | UM  | UM  | UM  | UM   | UM  |
| AT3G20180 | UM   | UM   | UM   | UM  | UM  | UM  | UM   | UM  |
| AT3G20190 | UM   | UM   | UM   | UM  | UM  | UM  | UM   | UM  |
| AT3G20200 | gbM  | gbM  | gbM  | gbM | gbM | gbM | gbM  | gbM |
| AT3G20210 | UM   | UM   | UM   | UM  | UM  | UM  | UM   | UM  |
| AT3G20220 | UM   | UM   | UM   | UM  | UM  | UM  | UM   | UM  |
| AT3G20230 | UM   | UM   | UM   | UM  | UM  | UM  | UM   | UM  |
| AT3G20240 | UM   | UM   | UM   | UM  | UM  | UM  | UM   | UM  |
| AT3G20250 | gbM  | gbM  | gbM  | gbM | gbM | gbM | mCHH | gbM |
| AT3G20260 | UM   | UM   | UM   | UM  | UM  | UM  | UM   | UM  |
| AT3G20270 | UM   | UM   | UM   | UM  | UM  | UM  | UM   | UM  |
| AT3G20280 | UM   | UM   | UM   | UM  | UM  | UM  | UM   | UM  |
| AT3G20290 | UM   | UM   | UM   | UM  | UM  | UM  | mCHH | UM  |
| AT3G20300 | UM   | UM   | UM   | UM  | UM  | UM  | mCHH | UM  |
| AT3G20310 | UM   | UM   | UM   | UM  | UM  | UM  | UM   | UM  |
| AT3G20320 | UM   | UM   | UM   | UM  | UM  | UM  | UM   | UM  |
| AT3G20330 | UM   | UM   | UM   | UM  | UM  | UM  | mCHH | UM  |
| AT3G20340 | UM   | UM   | UM   | UM  | UM  | UM  | UM   | UM  |
| AT3G20350 | UM   | gbM  | UM   | UM  | UM  | UM  | mCHH | UM  |
| AT3G20360 | UM   | UM   | UM   | UM  | UM  | UM  | UM   | UM  |
| AT3G20362 | mCHH | mCHH | mCHH | UM  | UM  | UM  | mCHH | UM  |
| AT3G20370 | UM   | UM   | UM   | UM  | UM  | UM  | UM   | UM  |
| AT3G20380 | UM   | UM   | UM   | UM  | UM  | UM  | UM   | UM  |
| AT3G20390 | UM   | UM   | UM   | UM  | UM  | UM  | UM   | UM  |
| AT3G20395 | UM   | UM   | UM   | UM  | UM  | UM  | mCHH | UM  |
| AT3G20400 | UM   | UM   | UM   | UM  | UM  | UM  | UM   | UM  |
| AT3G20410 | UM   | UM   | UM   | UM  | UM  | UM  | UM   | UM  |
| AT3G20420 | UM   | UM   | UM   | UM  | UM  | UM  | UM   | UM  |
| AT3G20430 | UM   | UM   | UM   | UM  | UM  | UM  | UM   | UM  |
| AT3G20440 | gbM  | mCHH | gbM  | UM  | UM  | UM  | mCHH | UM  |
| AT3G20450 | UM   | UM   | UM   | UM  | UM  | UM  | UM   | UM  |
| AT3G20460 | UM   | UM   | UM   | UM  | UM  | UM  | UM   | UM  |
| AT3G20470 | UM   | UM   | UM   | UM  | UM  | UM  | UM   | UM  |
| AT3G20475 | UM   | mCHH | UM   | UM  | UM  | UM  | UM   | UM  |
| AT3G20480 | UM   | UM   | UM   | UM  | UM  | UM  | UM   | UM  |
| AT3G20490 | UM   | UM   | UM   | UM  | UM  | UM  | UM   | UM  |
| AT3G20500 | UM   | UM   | UM   | UM  | UM  | UM  | UM   | UM  |

|           |      |      |      |      |      |      |      |      |
|-----------|------|------|------|------|------|------|------|------|
| AT3G20510 | UM   |
| AT3G20520 | UM   |
| AT3G20530 | UM   | mCHH | UM   | UM   | UM   | UM   | UM   | UM   |
| AT3G20540 | gbM  | mCHH | gbM  | gbM  | gbM  | gbM  | mCHH | gbM  |
| AT3G20550 | UM   | mCHH | UM   | UM   | UM   | UM   | gbM  | UM   |
| AT3G20555 | UM   |
| AT3G20557 | UM   |
| AT3G20560 | gbM  | gbM  | UM   | UM   | UM   | UM   | UM   | UM   |
| AT3G20570 | UM   |
| AT3G20580 | UM   |
| AT3G20590 | UM   |
| AT3G20600 | UM   |
| AT3G20610 | UM   |
| AT3G20620 | UM   |
| AT3G20630 | gbM  |
| AT3G20640 | UM   |
| AT3G20650 | gbM  |
| AT3G20660 | gbM  | mCHG | gbM  | gbM  | gbM  | gbM  | gbM  | gbM  |
| AT3G20670 | UM   |
| AT3G20680 | UM   | UM   | UM   | UM   | UM   | UM   | mCHH | UM   |
| AT3G20690 | mCHH | mCHH | mCHH | UM   | mCHH | mCHH | mCHH | mCHH |
| AT3G20700 | mCHH |
| AT3G20710 | UM   |
| AT3G20720 | gbM  | mCHH | gbM  | gbM  | gbM  | gbM  | gbM  | gbM  |
| AT3G20730 | UM   | gbM  | UM   | UM   | UM   | UM   | gbM  | UM   |
| AT3G20740 | UM   |
| AT3G20750 | UM   |
| AT3G20760 | UM   | UM   | UM   | UM   | UM   | UM   | mCHH | UM   |
| AT3G20770 | gbM  | gbM  | gbM  | gbM  | gbM  | gbM  | mCHH | gbM  |
| AT3G20780 | UM   | UM   | UM   | UM   | UM   | UM   | mCHH | UM   |
| AT3G20790 | UM   |
| AT3G20800 | UM   |
| AT3G20810 | UM   |
| AT3G20820 | UM   |
| AT3G20830 | UM   |
| AT3G20840 | UM   |
| AT3G20850 | mCHH | UM   | UM   | UM   | UM   | UM   | mCHH | UM   |
| AT3G20860 | UM   |
| AT3G20865 | UM   |
| AT3G20870 | UM   |
| AT3G20880 | UM   |
| AT3G20890 | UM   |
| AT3G20898 | UM   |
| AT3G20900 | UM   |
| AT3G20910 | UM   |
| AT3G20920 | gbM  | gbM  | gbM  | gbM  | UM   | UM   | gbM  | UM   |
| AT3G20930 | UM   |
| AT3G20935 | gbM  | mCHG | gbM  | gbM  | gbM  | gbM  | mCHH | gbM  |

|           |      |      |      |      |      |      |      |      |
|-----------|------|------|------|------|------|------|------|------|
| AT3G20940 | UM   | UM   | UM   | UM   | UM   | UM   | mCHH | UM   |
| AT3G20950 | mCHH |
| AT3G20960 | UM   |
| AT3G20966 | UM   |
| AT3G20970 | UM   |
| AT3G20980 | UM   |
| AT3G20993 | UM   |
| AT3G20997 | UM   |
| AT3G21000 | UM   |
| AT3G21055 | UM   |
| AT3G21060 | UM   |
| AT3G21070 | UM   | UM   | UM   | UM   | UM   | UM   | mCHH | UM   |
| AT3G21080 | UM   |
| AT3G21090 | UM   |
| AT3G21100 | UM   |
| AT3G21110 | UM   |
| AT3G21120 | UM   | UM   | UM   | UM   | UM   | UM   | mCHH | UM   |
| AT3G21130 | mCHH | mCHH | mCHG | mCHG | UM   | mCHG | mCHH | mCHG |
| AT3G21140 | UM   |
| AT3G21150 | UM   |
| AT3G21160 | gbM  |
| AT3G21170 | mCHH |
| AT3G21175 | gbM  | UM   | gbM  | UM   | UM   | UM   | gbM  | UM   |
| AT3G21180 | UM   | UM   | UM   | UM   | UM   | UM   | mCHH | UM   |
| AT3G21190 | UM   |
| AT3G21200 | UM   |
| AT3G21210 | UM   |
| AT3G21215 | UM   |
| AT3G21220 | UM   |
| AT3G21230 | UM   |
| AT3G21240 | UM   |
| AT3G21250 | UM   | UM   | UM   | UM   | UM   | UM   | mCHH | UM   |
| AT3G21260 | UM   |
| AT3G21270 | UM   |
| AT3G21280 | UM   |
| AT3G21290 | gbM  | mCHH | gbM  | gbM  | gbM  | gbM  | mCHH | gbM  |
| AT3G21295 | gbM  | gbM  | gbM  | gbM  | gbM  | gbM  | mCHH | gbM  |
| AT3G21300 | UM   |
| AT3G21310 | gbM  | gbM  | gbM  | UM   | UM   | gbM  | gbM  | gbM  |
| AT3G21320 | UM   |
| AT3G21330 | UM   | mCHH | UM   | UM   | UM   | UM   | UM   | UM   |
| AT3G21338 | UM   |
| AT3G21340 | UM   | UM   | UM   | UM   | UM   | UM   | mCHH | UM   |
| AT3G21350 | UM   |
| AT3G21351 | UM   |
| AT3G21352 | UM   |
| AT3G21360 | UM   |
| AT3G21370 | UM   |

|           |      |      |      |      |      |      |      |      |
|-----------|------|------|------|------|------|------|------|------|
| AT3G21371 | UM   |
| AT3G21380 | UM   |
| AT3G21390 | UM   |
| AT3G21400 | UM   |
| AT3G21410 | UM   |
| AT3G21420 | UM   |
| AT3G21430 | gbM  | mCHH | gbM  | gbM  | gbM  | gbM  | mCHH | gbM  |
| AT3G21450 | UM   |
| AT3G21460 | UM   |
| AT3G21465 | UM   |
| AT3G21470 | UM   |
| AT3G21480 | gbM  | mCHH | gbM  | gbM  | gbM  | gbM  | mCHH | gbM  |
| AT3G21490 | gbM  | gbM  | UM   | UM   | UM   | UM   | UM   | UM   |
| AT3G21500 | UM   |
| AT3G21510 | UM   | UM   | UM   | UM   | gbM  | UM   | UM   | UM   |
| AT3G21520 | UM   |
| AT3G21530 | UM   |
| AT3G21540 | gbM  | gbM  | gbM  | UM   | gbM  | gbM  | mCHH | UM   |
| AT3G21550 | UM   |
| AT3G21560 | UM   |
| AT3G21570 | mCHH | mCHH | mCHH | mCHG | mCHH | mCHH | mCHH | mCHG |
| AT3G21580 | UM   |
| AT3G21590 | UM   |
| AT3G21600 | UM   |
| AT3G21610 | UM   |
| AT3G21620 | UM   | UM   | UM   | UM   | UM   | UM   | mCHH | UM   |
| AT3G21630 | UM   |
| AT3G21640 | UM   |
| AT3G21650 | gbM  | UM   |
| AT3G21660 | UM   |
| AT3G21670 | UM   |
| AT3G21680 | UM   |
| AT3G21690 | UM   |
| AT3G21700 | UM   | UM   | UM   | UM   | UM   | UM   | mCHH | UM   |
| AT3G21710 | UM   |
| AT3G21720 | UM   |
| AT3G21730 | UM   |
| AT3G21740 | UM   |
| AT3G21750 | UM   |
| AT3G21760 | UM   |
| AT3G21770 | UM   |
| AT3G21780 | UM   |
| AT3G21790 | UM   |
| AT3G21800 | UM   |
| AT3G21810 | UM   |
| AT3G21820 | UM   |
| AT3G21830 | UM   |
| AT3G21840 | UM   |





|           |      |      |      |      |      |      |      |      |
|-----------|------|------|------|------|------|------|------|------|
| AT3G22250 | UM   |
| AT3G22260 | UM   |
| AT3G22270 | gbM  |
| AT3G22275 | UM   |
| AT3G22290 | gbM  | gbM  | gbM  | UM   | UM   | gbM  | gbM  | gbM  |
| AT3G22300 | UM   |
| AT3G22310 | UM   |
| AT3G22320 | UM   |
| AT3G22330 | UM   | gbM  | gbM  | UM   | gbM  | UM   | gbM  | gbM  |
| AT3G22345 | UM   |
| AT3G22350 | mCHH | mCHH | mCHH | mCHH | mCHG | mCHH | mCHH | mCHH |
| AT3G22360 | UM   |
| AT3G22370 | UM   |
| AT3G22380 | UM   | gbM  | UM   | UM   | UM   | UM   | gbM  | UM   |
| AT3G22400 | UM   |
| AT3G22410 | UM   |
| AT3G22415 | UM   |
| AT3G22420 | UM   |
| AT3G22421 | mCHH | mCHH | mCHH | mCHG | mCHH | mCHH | mCHH | mCHH |
| AT3G22425 | UM   |
| AT3G22430 | UM   |
| AT3G22436 | UM   |
| AT3G22440 | UM   |
| AT3G22450 | UM   |
| AT3G22460 | UM   |
| AT3G22470 | UM   |
| AT3G22480 | UM   |
| AT3G22490 | UM   |
| AT3G22500 | UM   |
| AT3G22510 | UM   |
| AT3G22520 | gbM  |
| AT3G22530 | UM   |
| AT3G22540 | UM   |
| AT3G22550 | UM   |
| AT3G22560 | UM   |
| AT3G22570 | UM   |
| AT3G22580 | mCHH |
| AT3G22590 | UM   |
| AT3G22600 | gbM  |
| AT3G22620 | UM   |
| AT3G22630 | UM   |
| AT3G22640 | UM   |
| AT3G22650 | UM   |
| AT3G22660 | gbM  | gbM  | UM   | UM   | UM   | gbM  | gbM  | UM   |
| AT3G22670 | UM   |
| AT3G22680 | UM   |
| AT3G22690 | UM   |
| AT3G22700 | UM   | mCHH | UM   | UM   | UM   | UM   | UM   | UM   |

|           |      |      |      |      |      |      |      |      |
|-----------|------|------|------|------|------|------|------|------|
| AT3G22710 | mCHH |
| AT3G22720 | mCHH | mCHH | mCHH | UM   | UM   | UM   | mCHH | mCHH |
| AT3G22723 | UM   |
| AT3G22730 | mCHH | mCHH | mCHH | UM   | mCHH | UM   | mCHH | mCHH |
| AT3G22740 | UM   |
| AT3G22750 | UM   |
| AT3G22760 | UM   |
| AT3G22770 | UM   | UM   | UM   | mCHH | mCHH | mCHG | mCHH | mCHH |
| AT3G22780 | gbM  | gbM  | gbM  | UM   | UM   | UM   | gbM  | UM   |
| AT3G22790 | gbM  | mCHH | mCHH | gbM  | gbM  | gbM  | mCHH | gbM  |
| AT3G22800 | UM   |
| AT3G22810 | UM   |
| AT3G22820 | UM   |
| AT3G22830 | UM   | UM   | UM   | UM   | UM   | UM   | mCHH | UM   |
| AT3G22840 | UM   |
| AT3G22845 | UM   |
| AT3G22850 | UM   |
| AT3G22860 | UM   |
| AT3G22870 | mCHH | mCHH | mCHH | mCHG | mCHH | mCHH | mCHH | mCHG |
| AT3G22880 | UM   |
| AT3G22890 | UM   |
| AT3G22900 | UM   |
| AT3G22910 | UM   | mCHH | UM   | UM   | UM   | UM   | UM   | UM   |
| AT3G22920 | UM   |
| AT3G22930 | UM   |
| AT3G22940 | mCHH |
| AT3G22942 | UM   |
| AT3G22950 | UM   |
| AT3G22960 | UM   | gbM  | UM   | UM   | UM   | UM   | UM   | UM   |
| AT3G22961 | UM   |
| AT3G22968 | UM   |
| AT3G22970 | UM   |
| AT3G22980 | gbM  |
| AT3G22990 | UM   |
| AT3G23000 | UM   |
| AT3G23010 | UM   | UM   | UM   | UM   | UM   | UM   | mCHH | UM   |
| AT3G23020 | gbM  | gbM  | gbM  | UM   | UM   | UM   | mCHH | gbM  |
| AT3G23030 | UM   |
| AT3G23040 | UM   |
| AT3G23050 | UM   |
| AT3G23060 | UM   |
| AT3G23070 | gbM  | mCHH | gbM  | gbM  | UM   | gbM  | gbM  | gbM  |
| AT3G23080 | UM   |
| AT3G23090 | UM   |
| AT3G23100 | UM   |
| AT3G23110 | UM   | UM   | UM   | UM   | UM   | UM   | mCHH | UM   |
| AT3G23120 | UM   |
| AT3G23130 | UM   |









|           |      |      |      |      |      |      |      |      |
|-----------|------|------|------|------|------|------|------|------|
| AT3G24800 | UM   |
| AT3G24810 | UM   |
| AT3G24820 | UM   |
| AT3G24830 | UM   |
| AT3G24840 | UM   |
| AT3G24850 | UM   |
| AT3G24860 | UM   |
| AT3G24870 | gbM  |
| AT3G24880 | gbM  |
| AT3G24890 | UM   |
| AT3G24900 | UM   | UM   | UM   | UM   | UM   | UM   | mCHH | UM   |
| AT3G24929 | UM   |
| AT3G24982 | gbM  | mCHH | gbM  | gbM  | mCHG | gbM  | mCHH | gbM  |
| AT3G25010 | UM   | mCHH | UM   | UM   | UM   | UM   | mCHH | UM   |
| AT3G25011 | UM   |
| AT3G25013 | UM   | UM   | UM   | UM   | UM   | UM   | gbM  | UM   |
| AT3G25014 | UM   |
| AT3G25020 | UM   |
| AT3G25030 | UM   |
| AT3G25040 | UM   |
| AT3G25050 | UM   |
| AT3G25060 | UM   |
| AT3G25070 | UM   |
| AT3G25080 | UM   |
| AT3G25090 | mCHH |
| AT3G25099 | UM   |
| AT3G25100 | UM   |
| AT3G25110 | UM   |
| AT3G25120 | UM   | UM   | UM   | UM   | UM   | UM   | mCHH | UM   |
| AT3G25130 | mCHH | mCHH | mCHH | UM   | UM   | UM   | mCHH | UM   |
| AT3G25140 | UM   |
| AT3G25150 | gbM  | gbM  | UM   | UM   | UM   | UM   | mCHH | UM   |
| AT3G25160 | UM   |
| AT3G25165 | UM   | UM   | UM   | UM   | UM   | UM   | gbM  | UM   |
| AT3G25170 | UM   |
| AT3G25180 | UM   |
| AT3G25190 | UM   |
| AT3G25200 | UM   |
| AT3G25210 | UM   |
| AT3G25220 | gbM  | gbM  | gbM  | UM   | gbM  | UM   | gbM  | UM   |
| AT3G25221 | UM   |
| AT3G25230 | UM   |
| AT3G25233 | UM   |
| AT3G25240 | UM   |
| AT3G25250 | UM   |
| AT3G25260 | UM   |
| AT3G25265 | UM   |
| AT3G25270 | UM   |



|           |      |      |      |      |      |      |      |      |
|-----------|------|------|------|------|------|------|------|------|
| AT3G25280 | UM   |
| AT3G25290 | UM   |
| AT3G25400 | UM   |
| AT3G25410 | UM   |
| AT3G25420 | UM   |
| AT3G25430 | UM   |
| AT3G25440 | gbM  | gbM  | UM   | UM   | UM   | UM   | gbM  | UM   |
| AT3G25460 | mCHH |
| AT3G25470 | UM   |
| AT3G25480 | UM   |
| AT3G25490 | UM   |
| AT3G25500 | UM   |
| AT3G25510 | UM   | mCHH | UM   | UM   | UM   | UM   | mCHH | UM   |
| AT3G25520 | UM   |
| AT3G25530 | gbM  |
| AT3G25540 | UM   |
| AT3G25545 | gbM  |
| AT3G25550 | UM   |
| AT3G25560 | UM   |
| AT3G25570 | UM   |
| AT3G25572 | UM   |
| AT3G25573 | UM   |
| AT3G25577 | UM   |
| AT3G25580 | UM   |
| AT3G25585 | mCHH | UM   | UM   | UM   | UM   | UM   | mCHH | UM   |
| AT3G25590 | UM   |
| AT3G25597 | UM   |
| AT3G25600 | UM   |
| AT3G25610 | UM   | UM   | UM   | UM   | UM   | UM   | mCHH | UM   |
| AT3G25620 | UM   |
| AT3G25640 | UM   |
| AT3G25650 | UM   |
| AT3G25655 | UM   |
| AT3G25660 | gbM  | gbM  | gbM  | UM   | gbM  | gbM  | gbM  | UM   |
| AT3G25670 | UM   |
| AT3G25680 | gbM  | gbM  | gbM  | gbM  | gbM  | gbM  | mCHH | gbM  |
| AT3G25690 | mCHH | gbM  | gbM  | gbM  | gbM  | gbM  | mCHH | gbM  |
| AT3G25700 | UM   |
| AT3G25710 | UM   |
| AT3G25716 | UM   |
| AT3G25717 | UM   |
| AT3G25719 | mCHH | UM   |
| AT3G25720 | mCHH |
| AT3G25727 | mCHH |
| AT3G25730 | UM   |
| AT3G25740 | UM   |
| AT3G25750 | UM   |
| AT3G25760 | UM   |





|           |      |      |      |      |      |      |      |      |
|-----------|------|------|------|------|------|------|------|------|
| AT3G26616 | mCHH |
| AT3G26618 | gbM  |
| AT3G26620 | UM   |
| AT3G26630 | UM   |
| AT3G26640 | UM   |
| AT3G26650 | UM   |
| AT3G26660 | UM   |
| AT3G26670 | UM   | UM   | UM   | UM   | UM   | UM   | mCHH | UM   |
| AT3G26680 | UM   |
| AT3G26690 | UM   |
| AT3G26700 | UM   | UM   | UM   | UM   | UM   | UM   | mCHH | UM   |
| AT3G26710 | UM   |
| AT3G26720 | gbM  | gbM  | gbM  | gbM  | gbM  | gbM  | mCHH | gbM  |
| AT3G26730 | gbM  | UM   | UM   | UM   | UM   | UM   | gbM  | UM   |
| AT3G26740 | UM   |
| AT3G26742 | UM   |
| AT3G26744 | UM   |
| AT3G26750 | UM   |
| AT3G26760 | UM   |
| AT3G26770 | UM   |
| AT3G26780 | UM   |
| AT3G26782 | gbM  | gbM  | gbM  | UM   | UM   | gbM  | gbM  | UM   |
| AT3G26790 | UM   |
| AT3G26800 | mCHH |
| AT3G26810 | gbM  |
| AT3G26820 | UM   |
| AT3G26830 | UM   |
| AT3G26840 | UM   |
| AT3G26850 | UM   |
| AT3G26855 | UM   |
| AT3G26860 | mCHH |
| AT3G26870 | mCHH |
| AT3G26880 | UM   |
| AT3G26890 | UM   |
| AT3G26900 | UM   |
| AT3G26910 | gbM  |
| AT3G26920 | UM   |
| AT3G26922 | UM   |
| AT3G26930 | UM   |
| AT3G26932 | UM   |
| AT3G26934 | mCHH | UM   | mCHH | UM   | UM   | UM   | UM   | UM   |
| AT3G26935 | gbM  | gbM  | gbM  | UM   | UM   | gbM  | gbM  | UM   |
| AT3G26940 | UM   |
| AT3G26950 | UM   |
| AT3G26960 | UM   | UM   | UM   | UM   | UM   | UM   | mCHH | UM   |
| AT3G26980 | UM   |
| AT3G26990 | gbM  |
| AT3G27000 | gbM  | gbM  | gbM  | UM   | UM   | UM   | mCHH | UM   |

|           |      |      |      |      |      |      |      |      |
|-----------|------|------|------|------|------|------|------|------|
| AT3G27010 | UM   |
| AT3G27020 | UM   |
| AT3G27025 | UM   | UM   | UM   | UM   | UM   | UM   | mCHH | UM   |
| AT3G27027 | UM   |
| AT3G27030 | UM   |
| AT3G27040 | mCHH |
| AT3G27050 | UM   |
| AT3G27060 | UM   |
| AT3G27070 | UM   |
| AT3G27080 | UM   |
| AT3G27090 | UM   |
| AT3G27100 | UM   |
| AT3G27110 | UM   |
| AT3G27120 | UM   |
| AT3G27130 | UM   |
| AT3G27140 | mCHH |
| AT3G27150 | UM   |
| AT3G27160 | UM   |
| AT3G27170 | UM   |
| AT3G27180 | UM   |
| AT3G27190 | UM   | UM   | UM   | UM   | UM   | UM   | mCHH | UM   |
| AT3G27200 | UM   |
| AT3G27210 | UM   |
| AT3G27220 | UM   |
| AT3G27230 | UM   |
| AT3G27240 | UM   |
| AT3G27250 | UM   |
| AT3G27260 | gbM  | mCHG | gbM  | gbM  | gbM  | gbM  | gbM  | gbM  |
| AT3G27270 | UM   |
| AT3G27280 | UM   |
| AT3G27290 | UM   |
| AT3G27300 | gbM  | UM   | gbM  | UM   | UM   | UM   | gbM  | UM   |
| AT3G27310 | UM   |
| AT3G27320 | UM   |
| AT3G27325 | gbM  | gbM  | gbM  | gbM  | gbM  | gbM  | mCHH | gbM  |
| AT3G27328 | UM   |
| AT3G27329 | mCHH |
| AT3G27330 | UM   | UM   | UM   | UM   | UM   | UM   | mCHH | UM   |
| AT3G27331 | mCHH |
| AT3G27340 | UM   |
| AT3G27350 | UM   |
| AT3G27360 | UM   |
| AT3G27380 | UM   |
| AT3G27390 | gbM  |
| AT3G27400 | UM   |
| AT3G27410 | UM   |
| AT3G27415 | UM   |
| AT3G27416 | UM   |

|           |      |      |      |      |      |      |      |      |
|-----------|------|------|------|------|------|------|------|------|
| AT3G27420 | UM   | UM   | UM   | UM   | UM   | gbM  | UM   | gbM  |
| AT3G27425 | UM   |
| AT3G27430 | UM   |
| AT3G27440 | UM   |
| AT3G27460 | UM   | UM   | UM   | UM   | UM   | UM   | mCHH | UM   |
| AT3G27470 | gbM  |
| AT3G27473 | UM   |
| AT3G27480 | UM   |
| AT3G27490 | UM   |
| AT3G27500 | UM   |
| AT3G27503 | UM   |
| AT3G27510 | UM   |
| AT3G27520 | UM   |
| AT3G27530 | gbM  | gbM  | gbM  | gbM  | gbM  | gbM  | mCHH | gbM  |
| AT3G27540 | UM   |
| AT3G27550 | UM   |
| AT3G27560 | UM   |
| AT3G27570 | UM   |
| AT3G27580 | UM   | gbM  |
| AT3G27590 | UM   |
| AT3G27600 | mCHH |
| AT3G27610 | UM   |
| AT3G27620 | UM   |
| AT3G27630 | UM   |
| AT3G27640 | UM   |
| AT3G27650 | UM   |
| AT3G27660 | UM   |
| AT3G27670 | gbM  | mCHH | gbM  | gbM  | gbM  | gbM  | mCHH | gbM  |
| AT3G27680 | mCHH |
| AT3G27690 | UM   |
| AT3G27700 | gbM  |
| AT3G27710 | gbM  | gbM  | gbM  | UM   | UM   | UM   | mCHH | UM   |
| AT3G27720 | UM   | UM   | UM   | UM   | UM   | UM   | mCHH | UM   |
| AT3G27730 | UM   |
| AT3G27740 | gbM  |
| AT3G27750 | UM   |
| AT3G27770 | UM   |
| AT3G27785 | UM   | UM   | UM   | UM   | UM   | UM   | mCHH | UM   |
| AT3G27800 | mCHH |
| AT3G27809 | UM   |
| AT3G27810 | UM   |
| AT3G27820 | UM   |
| AT3G27830 | UM   |
| AT3G27831 | UM   |
| AT3G27835 | UM   |
| AT3G27840 | UM   |
| AT3G27850 | UM   |
| AT3G27860 | mCHH | UM   | UM   | UM   | UM   | UM   | mCHH | UM   |

|           |      |      |      |         |         |         |      |         |
|-----------|------|------|------|---------|---------|---------|------|---------|
| AT3G27870 | gbM  | gbM  | gbM  | gbM     | gbM     | gbM     | mCHH | gbM     |
| AT3G27880 | UM   | UM   | UM   | UM      | UM      | UM      | UM   | UM      |
| AT3G27890 | UM   | UM   | UM   | UM      | UM      | UM      | UM   | UM      |
| AT3G27900 | UM   | UM   | UM   | UM      | UM      | UM      | UM   | UM      |
| AT3G27906 | UM   | UM   | UM   | UM      | UM      | UM      | UM   | UM      |
| AT3G27910 | UM   | mCHH | UM   | UM      | UM      | UM      | UM   | UM      |
| AT3G27920 | UM   | UM   | UM   | UM      | UM      | UM      | UM   | UM      |
| AT3G27925 | UM   | UM   | UM   | UM      | UM      | UM      | UM   | UM      |
| AT3G27930 | UM   | UM   | UM   | UM      | UM      | UM      | UM   | UM      |
| AT3G27940 | UM   | UM   | UM   | UM      | UM      | UM      | UM   | UM      |
| AT3G27950 | gbM  | gbM  | UM   | gbM     | UM      | gbM     | gbM  | gbM     |
| AT3G27960 | gbM  | gbM  | UM   | UM      | UM      | UM      | gbM  | UM      |
| AT3G27968 | UM   | UM   | mCHH | UM      | UM      | UM      | mCHH | mCHH    |
| AT3G27970 | UM   | UM   | UM   | UM      | UM      | UM      | UM   | UM      |
| AT3G27980 | mCHH | mCHH | mCHH | mCHH    | mCHG    | mCHH    | mCHH | mCHH    |
| AT3G27999 | mCHH | mCHH | mCHH | mCHH    | mCHH    | mCHH    | mCHH | mCHH    |
| AT3G28007 | UM   | UM   | UM   | UM      | UM      | UM      | UM   | UM      |
| AT3G28020 | UM   | UM   | UM   | UM      | UM      | UM      | mCHH | UM      |
| AT3G28030 | gbM  | mCHH | gbM  | gbM     | UM      | gbM     | mCHH | UM      |
| AT3G28040 | UM   | UM   | UM   | UM      | UM      | UM      | UM   | UM      |
| AT3G28050 | UM   | UM   | UM   | UM      | UM      | UM      | UM   | UM      |
| AT3G28060 | UM   | UM   | UM   | UM      | UM      | UM      | UM   | UM      |
| AT3G28070 | UM   | UM   | UM   | UM      | UM      | UM      | UM   | UM      |
| AT3G28080 | UM   | UM   | UM   | UM      | UM      | UM      | UM   | UM      |
| AT3G28100 | UM   | UM   | UM   | UM      | UM      | UM      | mCHH | UM      |
| AT3G28120 | mCHH | mCHH | mCHH | mCHH    | mCHH    | mCHH    | mCHH | UM      |
| AT3G28130 | UM   | UM   | UM   | UM      | UM      | UM      | UM   | UM      |
| AT3G28140 | UM   | UM   | UM   | UM      | UM      | UM      | UM   | UM      |
| AT3G28150 | UM   | gbM  | gbM  | UM      | UM      | UM      | mCHH | UM      |
| AT3G28155 | UM   | UM   | UM   | UM      | UM      | UM      | UM   | UM      |
| AT3G28170 | UM   | UM   | UM   | UM      | UM      | UM      | UM   | UM      |
| AT3G28180 | UM   | UM   | UM   | UM      | UM      | UM      | UM   | UM      |
| AT3G28190 | UM   | UM   | UM   | UM      | UM      | UM      | UM   | UM      |
| AT3G28193 | mCHH | mCHH | mCHH | gbM     | gbM     | mCHG    | mCHH | gbM     |
| AT3G28200 | UM   | UM   | UM   | UM      | UM      | UM      | UM   | UM      |
| AT3G28210 | UM   | UM   | UM   | UM      | UM      | UM      | UM   | UM      |
| AT3G28216 | UM   | UM   | UM   | UM      | UM      | UM      | UM   | UM      |
| AT3G28220 | mCHG | mCHH | mCHG | UM      | UM      | UM      | mCHH | UM      |
| AT3G28223 | UM   | UM   | UM   | UM      | UM      | UM      | UM   | UM      |
| AT3G28230 | UM   | UM   | UM   | UM      | UM      | UM      | UM   | UM      |
| AT3G28243 | UM   | UM   | UM   | UM      | UM      | UM      | mCHH | UM      |
| AT3G28250 | UM   | UM   | UM   | UM      | UM      | UM      | UM   | UM      |
| AT3G28260 | UM   | UM   | UM   | UM      | UM      | UM      | UM   | UM      |
| AT3G28270 | UM   | mCHH | UM   | UM      | UM      | UM      | mCHG | UM      |
| AT3G28280 | UM   | UM   | UM   | UM      | UM      | UM      | UM   | UM      |
| AT3G28290 | UM   | UM   | UM   | unknown | unknown | unknown | UM   | unknown |
| AT3G28291 | UM   | UM   | UM   | UM      | UM      | UM      | UM   | UM      |
| AT3G28300 | UM   | UM   | UM   | unknown | unknown | unknown | UM   | unknown |

















|           |      |      |      |      |      |      |      |      |
|-----------|------|------|------|------|------|------|------|------|
| AT3G43550 | mCHH | mCHH | mCHH | mCHG | mCHG | mCHH | mCHH | mCHH |
| AT3G43570 | mCHH | mCHH | mCHH | mCHH | mCHG | mCHH | mCHH | mCHH |
| AT3G43572 | mCHH |
| AT3G43574 | mCHH | mCHG |
| AT3G43580 | UM   |
| AT3G43583 | mCHG | mCHG | mCHG | UM   | UM   | mCHG | mCHH | mCHG |
| AT3G43590 | gbM  | UM   |
| AT3G43600 | gbM  | gbM  | gbM  | gbM  | gbM  | gbM  | mCHH | gbM  |
| AT3G43610 | gbM  | mCHH | gbM  | gbM  | gbM  | gbM  | mCHH | gbM  |
| AT3G43623 | mCHH |
| AT3G43630 | UM   | mCHH | UM   | UM   | UM   | UM   | UM   | UM   |
| AT3G43660 | UM   |
| AT3G43670 | UM   |
| AT3G43682 | mCHH |
| AT3G43700 | UM   |
| AT3G43710 | UM   |
| AT3G43720 | UM   |
| AT3G43722 | mCHH | mCHH | mCHH | UM   | UM   | UM   | mCHH | UM   |
| AT3G43740 | UM   |
| AT3G43750 | UM   | mCHH | UM   | UM   | UM   | UM   | UM   | UM   |
| AT3G43790 | UM   |
| AT3G43800 | UM   |
| AT3G43810 | gbM  | gbM  | gbM  | gbM  | UM   | gbM  | gbM  | gbM  |
| AT3G43829 | UM   |
| AT3G43833 | mCHH |
| AT3G43840 | UM   |
| AT3G43850 | UM   |
| AT3G43860 | UM   |
| AT3G43870 | mCHH |
| AT3G43880 | mCHH | mCHH | mCHH | mCHH | mCHH | mCHG | mCHH | mCHH |
| AT3G43890 | UM   |
| AT3G43900 | UM   |
| AT3G43910 | UM   |
| AT3G43920 | gbM  | mCHH | gbM  | gbM  | gbM  | gbM  | mCHH | gbM  |
| AT3G43930 | UM   |
| AT3G43940 | mCHH | mCHH | mCHH | mCHG | mCHG | mCHH | mCHH | mCHG |
| AT3G43950 | mCHH | mCHH | mCHH | mCHH | mCHG | mCHH | mCHH | mCHH |
| AT3G43960 | UM   |
| AT3G43970 | UM   | UM   | UM   | UM   | UM   | mCHH | UM   | UM   |
| AT3G43980 | UM   |
| AT3G43990 | mCHH | UM   | mCHH | UM   | UM   | UM   | mCHH | UM   |
| AT3G44006 | mCHH | mCHH | mCHH | gbM  | mCHG | mCHG | mCHH | mCHG |
| AT3G44010 | gbM  | gbM  | UM   | UM   | UM   | UM   | gbM  | UM   |
| AT3G44020 | UM   |
| AT3G44050 | UM   | mCHH | UM   | UM   | UM   | UM   | mCHH | UM   |
| AT3G44060 | mCHG | mCHG | mCHG | UM   | UM   | UM   | mCHH | UM   |
| AT3G44070 | mCHH |
| AT3G44080 | gbM  | mCHH | gbM  | gbM  | gbM  | gbM  | mCHH | gbM  |





|           |      |      |      |      |      |      |      |      |
|-----------|------|------|------|------|------|------|------|------|
| AT3G44580 | mCHH |
| AT3G44590 | UM   |
| AT3G44600 | UM   | UM   | UM   | UM   | UM   | UM   | mCHH | UM   |
| AT3G44610 | UM   |
| AT3G44620 | UM   |
| AT3G44630 | UM   | UM   | UM   | UM   | UM   | UM   | mCHH | UM   |
| AT3G44660 | UM   |
| AT3G44670 | UM   | UM   | UM   | UM   | UM   | UM   | mCHH | UM   |
| AT3G44680 | gbM  |
| AT3G44690 | gbM  | gbM  | gbM  | UM   | UM   | UM   | mCHH | UM   |
| AT3G44700 | UM   |
| AT3G44704 | UM   |
| AT3G44710 | UM   |
| AT3G44713 | UM   |
| AT3G44716 | UM   |
| AT3G44718 | UM   |
| AT3G44720 | UM   |
| AT3G44730 | gbM  | gbM  | gbM  | UM   | gbM  | gbM  | gbM  | gbM  |
| AT3G44735 | UM   |
| AT3G44740 | UM   |
| AT3G44750 | UM   |
| AT3G44755 | UM   |
| AT3G44760 | UM   |
| AT3G44770 | UM   |
| AT3G44780 | mCHH | mCHH | mCHH | mCHG | gbM  | mCHG | mCHH | mCHG |
| AT3G44783 | UM   | mCHH | mCHH | UM   | UM   | mCHH | mCHH | UM   |
| AT3G44784 | UM   |
| AT3G44785 | UM   |
| AT3G44790 | UM   |
| AT3G44800 | UM   |
| AT3G44805 | UM   |
| AT3G44810 | UM   |
| AT3G44820 | gbM  |
| AT3G44830 | gbM  | gbM  | gbM  | UM   | UM   | UM   | gbM  | UM   |
| AT3G44840 | UM   |
| AT3G44850 | gbM  | mCHH | gbM  | gbM  | gbM  | gbM  | mCHH | gbM  |
| AT3G44860 | UM   |
| AT3G44870 | UM   | UM   | UM   | UM   | UM   | UM   | gbM  | UM   |
| AT3G44880 | UM   | gbM  | gbM  | gbM  | UM   | gbM  | gbM  | gbM  |
| AT3G44890 | gbM  |
| AT3G44900 | gbM  | gbM  | gbM  | gbM  | gbM  | gbM  | mCHH | gbM  |
| AT3G44910 | UM   | mCHH | UM   | UM   | UM   | UM   | mCHH | UM   |
| AT3G44920 | UM   |
| AT3G44930 | UM   |
| AT3G44935 | mCHH | mCHH | mCHH | mCHG | mCHG | mCHH | mCHH | mCHG |
| AT3G44940 | UM   |
| AT3G44950 | UM   |
| AT3G44960 | UM   |

|           |      |      |      |      |      |      |      |      |
|-----------|------|------|------|------|------|------|------|------|
| AT3G44970 | UM   |
| AT3G44980 | mCHH |
| AT3G44990 | UM   |
| AT3G45000 | UM   |
| AT3G45010 | UM   |
| AT3G45020 | UM   |
| AT3G45030 | UM   |
| AT3G45040 | UM   | mCHH | UM   | UM   | UM   | UM   | mCHH | UM   |
| AT3G45050 | UM   |
| AT3G45060 | UM   |
| AT3G45070 | UM   |
| AT3G45080 | UM   |
| AT3G45090 | gbM  | gbM  | gbM  | gbM  | gbM  | gbM  | mCHH | gbM  |
| AT3G45093 | UM   |
| AT3G45100 | gbM  | mCHH | gbM  | gbM  | gbM  | gbM  | mCHH | gbM  |
| AT3G45110 | UM   |
| AT3G45130 | UM   | UM   | UM   | UM   | UM   | UM   | mCHH | UM   |
| AT3G45140 | mCHH | mCHH | mCHH | mCHG | mCHH | mCHH | mCHH | mCHH |
| AT3G45150 | UM   |
| AT3G45160 | UM   |
| AT3G45170 | mCHG | gbM  | mCHG | gbM  | gbM  | gbM  | mCHH | UM   |
| AT3G45180 | UM   |
| AT3G45190 | gbM  | mCHH | gbM  | gbM  | gbM  | gbM  | gbM  | gbM  |
| AT3G45200 | mCHH |
| AT3G45210 | UM   |
| AT3G45220 | UM   |
| AT3G45230 | UM   |
| AT3G45240 | gbM  |
| AT3G45242 | UM   |
| AT3G45243 | UM   | UM   | UM   | UM   | UM   | UM   | mCHH | UM   |
| AT3G45245 | UM   |
| AT3G45248 | UM   |
| AT3G45252 | UM   |
| AT3G45260 | UM   |
| AT3G45275 | UM   | UM   | UM   | UM   | UM   | UM   | mCHH | UM   |
| AT3G45280 | UM   |
| AT3G45285 | UM   |
| AT3G45290 | UM   | UM   | UM   | UM   | UM   | UM   | mCHH | UM   |
| AT3G45300 | gbM  |
| AT3G45310 | UM   |
| AT3G45320 | UM   |
| AT3G45330 | UM   |
| AT3G45390 | UM   |
| AT3G45400 | gbM  | gbM  | gbM  | gbM  | gbM  | gbM  | mCHH | gbM  |
| AT3G45410 | UM   |
| AT3G45420 | gbM  | gbM  | gbM  | UM   | gbM  | gbM  | gbM  | UM   |
| AT3G45430 | UM   |
| AT3G45440 | UM   |

|           |      |      |      |      |      |      |      |      |
|-----------|------|------|------|------|------|------|------|------|
| AT3G45443 | UM   |
| AT3G45450 | UM   |
| AT3G45460 | UM   |
| AT3G45470 | UM   |
| AT3G45480 | UM   | mCHH | UM   | UM   | UM   | UM   | mCHH | UM   |
| AT3G45490 | UM   |
| AT3G45500 | UM   |
| AT3G45510 | mCHH |
| AT3G45525 | mCHH |
| AT3G45530 | UM   |
| AT3G45540 | UM   |
| AT3G45555 | UM   |
| AT3G45560 | UM   | mCHH | UM   | UM   | UM   | UM   | mCHH | UM   |
| AT3G45570 | UM   | UM   | UM   | UM   | UM   | UM   | mCHH | UM   |
| AT3G45577 | UM   |
| AT3G45580 | UM   |
| AT3G45590 | gbM  | gbM  | gbM  | UM   | UM   | UM   | gbM  | UM   |
| AT3G45600 | UM   |
| AT3G45610 | UM   |
| AT3G45620 | UM   | gbM  | UM   | UM   | UM   | UM   | gbM  | UM   |
| AT3G45630 | gbM  |
| AT3G45640 | UM   |
| AT3G45650 | gbM  | gbM  | gbM  | gbM  | UM   | gbM  | gbM  | gbM  |
| AT3G45660 | UM   |
| AT3G45670 | mCHG | mCHG | UM   | UM   | UM   | UM   | mCHG | UM   |
| AT3G45673 | UM   |
| AT3G45680 | UM   |
| AT3G45690 | UM   | gbM  | UM   | UM   | UM   | UM   | UM   | UM   |
| AT3G45700 | UM   |
| AT3G45710 | UM   |
| AT3G45720 | UM   |
| AT3G45730 | UM   |
| AT3G45740 | UM   |
| AT3G45750 | gbM  | gbM  | gbM  | gbM  | gbM  | gbM  | mCHH | gbM  |
| AT3G45760 | UM   |
| AT3G45770 | UM   |
| AT3G45780 | UM   |
| AT3G45790 | UM   |
| AT3G45800 | mCHH |
| AT3G45810 | UM   | mCHH | UM   | UM   | UM   | UM   | UM   | UM   |
| AT3G45820 | mCHH | mCHH | mCHH | mCHG | mCHH | mCHG | mCHH | mCHG |
| AT3G45830 | gbM  | gbM  | gbM  | gbM  | gbM  | gbM  | mCHH | gbM  |
| AT3G45840 | mCHH |
| AT3G45850 | gbM  | mCHH | gbM  | gbM  | gbM  | gbM  | mCHH | gbM  |
| AT3G45851 | UM   |
| AT3G45860 | UM   |
| AT3G45870 | UM   | gbM  | UM   | UM   | UM   | UM   | UM   | UM   |
| AT3G45880 | UM   |







|           |      |      |      |     |     |     |      |     |
|-----------|------|------|------|-----|-----|-----|------|-----|
| AT3G47340 | UM   | UM   | UM   | UM  | UM  | UM  | UM   | UM  |
| AT3G47341 | UM   | UM   | UM   | UM  | UM  | UM  | UM   | UM  |
| AT3G47350 | mCHH | mCHH | mCHH | UM  | UM  | UM  | mCHH | UM  |
| AT3G47360 | UM   | UM   | UM   | UM  | UM  | UM  | UM   | UM  |
| AT3G47370 | UM   | UM   | UM   | UM  | UM  | UM  | UM   | UM  |
| AT3G47380 | UM   | UM   | UM   | UM  | UM  | UM  | UM   | UM  |
| AT3G47390 | UM   | UM   | UM   | UM  | UM  | UM  | UM   | UM  |
| AT3G47400 | mCHG | UM   | UM   | UM  | UM  | UM  | mCHG | UM  |
| AT3G47410 | UM   | UM   | UM   | UM  | UM  | UM  | UM   | UM  |
| AT3G47420 | UM   | UM   | UM   | UM  | UM  | UM  | UM   | UM  |
| AT3G47430 | UM   | UM   | UM   | UM  | UM  | UM  | UM   | UM  |
| AT3G47440 | UM   | UM   | UM   | UM  | UM  | UM  | UM   | UM  |
| AT3G47450 | UM   | UM   | UM   | UM  | UM  | UM  | UM   | UM  |
| AT3G47460 | mCHH | mCHH | UM   | UM  | UM  | UM  | mCHH | UM  |
| AT3G47470 | UM   | UM   | UM   | UM  | UM  | UM  | UM   | UM  |
| AT3G47480 | UM   | UM   | UM   | UM  | UM  | UM  | UM   | UM  |
| AT3G47490 | UM   | UM   | UM   | UM  | UM  | UM  | UM   | UM  |
| AT3G47500 | UM   | UM   | UM   | UM  | UM  | UM  | UM   | UM  |
| AT3G47510 | UM   | UM   | UM   | UM  | UM  | UM  | UM   | UM  |
| AT3G47520 | UM   | UM   | UM   | UM  | UM  | UM  | UM   | UM  |
| AT3G47530 | UM   | UM   | UM   | UM  | UM  | UM  | UM   | UM  |
| AT3G47540 | UM   | UM   | UM   | UM  | UM  | UM  | UM   | UM  |
| AT3G47543 | UM   | UM   | UM   | UM  | UM  | UM  | UM   | UM  |
| AT3G47550 | gbM  | gbM  | gbM  | gbM | UM  | gbM | gbM  | gbM |
| AT3G47560 | UM   | UM   | UM   | UM  | UM  | UM  | UM   | UM  |
| AT3G47570 | UM   | UM   | UM   | UM  | UM  | UM  | UM   | UM  |
| AT3G47580 | UM   | UM   | UM   | UM  | UM  | UM  | UM   | UM  |
| AT3G47590 | UM   | UM   | UM   | UM  | UM  | UM  | UM   | UM  |
| AT3G47600 | UM   | UM   | UM   | UM  | UM  | UM  | UM   | UM  |
| AT3G47610 | UM   | UM   | UM   | UM  | UM  | UM  | mCHH | UM  |
| AT3G47620 | UM   | UM   | UM   | UM  | UM  | UM  | UM   | UM  |
| AT3G47630 | UM   | UM   | UM   | UM  | UM  | UM  | UM   | UM  |
| AT3G47640 | UM   | UM   | UM   | UM  | UM  | UM  | UM   | UM  |
| AT3G47650 | UM   | UM   | UM   | UM  | UM  | UM  | UM   | UM  |
| AT3G47660 | gbM  | gbM  | gbM  | gbM | gbM | gbM | gbM  | gbM |
| AT3G47670 | UM   | UM   | UM   | UM  | UM  | UM  | UM   | UM  |
| AT3G47675 | UM   | UM   | UM   | UM  | UM  | UM  | UM   | UM  |
| AT3G47680 | mCHH | mCHG | UM   | UM  | UM  | UM  | mCHH | UM  |
| AT3G47690 | UM   | UM   | UM   | UM  | UM  | UM  | UM   | UM  |
| AT3G47700 | gbM  | gbM  | UM   | UM  | UM  | UM  | gbM  | UM  |
| AT3G47710 | UM   | UM   | UM   | UM  | UM  | UM  | UM   | UM  |
| AT3G47720 | UM   | UM   | UM   | UM  | UM  | UM  | UM   | UM  |
| AT3G47730 | gbM  | UM   | gbM  | UM  | UM  | UM  | gbM  | UM  |
| AT3G47740 | UM   | UM   | UM   | UM  | UM  | UM  | mCHH | UM  |
| AT3G47750 | UM   | UM   | UM   | UM  | UM  | UM  | mCHH | UM  |
| AT3G47760 | UM   | UM   | UM   | UM  | UM  | UM  | UM   | UM  |
| AT3G47770 | UM   | UM   | UM   | UM  | UM  | UM  | UM   | UM  |
| AT3G47780 | UM   | mCHH | UM   | UM  | UM  | UM  | UM   | UM  |

|           |      |      |      |      |      |      |      |      |
|-----------|------|------|------|------|------|------|------|------|
| AT3G47790 | gbM  | gbM  | gbM  | gbM  | gbM  | gbM  | mCHG | gbM  |
| AT3G47800 | UM   |
| AT3G47810 | UM   |
| AT3G47820 | UM   |
| AT3G47830 | UM   |
| AT3G47833 | UM   |
| AT3G47836 | UM   |
| AT3G47840 | UM   |
| AT3G47850 | UM   |
| AT3G47860 | UM   |
| AT3G47870 | gbM  | UM   |
| AT3G47890 | gbM  | mCHH | gbM  | gbM  | gbM  | gbM  | mCHH | gbM  |
| AT3G47910 | gbM  | mCHH | gbM  | gbM  | gbM  | gbM  | mCHH | gbM  |
| AT3G47920 | mCHH |
| AT3G47930 | UM   |
| AT3G47940 | mCHH | UM   |
| AT3G47950 | UM   |
| AT3G47960 | gbM  |
| AT3G47965 | UM   |
| AT3G47980 | UM   |
| AT3G47990 | UM   |
| AT3G48000 | UM   |
| AT3G48010 | UM   |
| AT3G48020 | UM   |
| AT3G48030 | UM   | UM   | UM   | UM   | UM   | UM   | mCHG | UM   |
| AT3G48040 | UM   |
| AT3G48050 | gbM  |
| AT3G48060 | gbM  |
| AT3G48070 | UM   |
| AT3G48080 | UM   | mCHH | UM   | UM   | UM   | UM   | mCHH | UM   |
| AT3G48090 | UM   |
| AT3G48100 | UM   |
| AT3G48110 | gbM  | gbM  | gbM  | gbM  | gbM  | UM   | mCHH | gbM  |
| AT3G48120 | UM   |
| AT3G48131 | mCHH | mCHH | mCHH | mCHH | UM   | mCHH | mCHH | UM   |
| AT3G48140 | UM   |
| AT3G48150 | gbM  |
| AT3G48160 | UM   |
| AT3G48170 | UM   |
| AT3G48180 | UM   |
| AT3G48185 | UM   | UM   | mCHH | UM   | UM   | UM   | UM   | UM   |
| AT3G48190 | gbM  | mCHH | gbM  | gbM  | gbM  | gbM  | mCHH | gbM  |
| AT3G48195 | gbM  | mCHH | gbM  | gbM  | gbM  | gbM  | gbM  | gbM  |
| AT3G48200 | UM   | UM   | UM   | UM   | UM   | UM   | mCHH | UM   |
| AT3G48205 | UM   |
| AT3G48208 | UM   |
| AT3G48209 | UM   |
| AT3G48210 | UM   | UM   | gbM  | UM   | UM   | UM   | gbM  | UM   |



|           |     |      |     |     |     |     |      |     |
|-----------|-----|------|-----|-----|-----|-----|------|-----|
| AT3G48220 | UM  | UM   | UM  | UM  | UM  | UM  | UM   | UM  |
| AT3G48230 | UM  | UM   | UM  | UM  | UM  | UM  | UM   | UM  |
| AT3G48231 | UM  | UM   | UM  | UM  | UM  | UM  | UM   | UM  |
| AT3G48237 | UM  | UM   | UM  | UM  | UM  | UM  | UM   | UM  |
| AT3G48240 | UM  | UM   | UM  | UM  | UM  | UM  | UM   | UM  |
| AT3G48250 | UM  | UM   | UM  | UM  | UM  | UM  | UM   | UM  |
| AT3G48260 | UM  | UM   | UM  | UM  | UM  | UM  | UM   | UM  |
| AT3G48270 | UM  | UM   | UM  | UM  | UM  | UM  | UM   | UM  |
| AT3G48280 | UM  | UM   | UM  | UM  | UM  | UM  | UM   | UM  |
| AT3G48290 | UM  | UM   | UM  | UM  | UM  | UM  | UM   | UM  |
| AT3G48298 | UM  | UM   | UM  | UM  | UM  | UM  | UM   | UM  |
| AT3G48300 | UM  | UM   | UM  | UM  | UM  | UM  | UM   | UM  |
| AT3G48310 | UM  | UM   | UM  | UM  | UM  | UM  | UM   | UM  |
| AT3G48320 | UM  | gbM  | UM  | UM  | UM  | UM  | UM   | UM  |
| AT3G48330 | UM  | UM   | UM  | UM  | UM  | UM  | UM   | UM  |
| AT3G48340 | UM  | UM   | UM  | UM  | UM  | UM  | UM   | UM  |
| AT3G48344 | UM  | UM   | UM  | UM  | UM  | UM  | UM   | UM  |
| AT3G48346 | UM  | UM   | UM  | UM  | UM  | UM  | UM   | UM  |
| AT3G48350 | UM  | UM   | UM  | UM  | UM  | UM  | UM   | UM  |
| AT3G48360 | UM  | UM   | UM  | UM  | UM  | UM  | UM   | UM  |
| AT3G48380 | UM  | gbM  | UM  | UM  | UM  | UM  | mCHH | UM  |
| AT3G48390 | UM  | UM   | UM  | UM  | UM  | UM  | UM   | UM  |
| AT3G48400 | UM  | UM   | UM  | UM  | UM  | UM  | UM   | UM  |
| AT3G48410 | UM  | UM   | UM  | UM  | UM  | UM  | UM   | UM  |
| AT3G48420 | UM  | UM   | UM  | UM  | UM  | UM  | UM   | UM  |
| AT3G48425 | UM  | UM   | UM  | UM  | UM  | UM  | UM   | UM  |
| AT3G48430 | gbM | mCHH | gbM | UM  | gbM | gbM | mCHH | gbM |
| AT3G48440 | UM  | UM   | UM  | UM  | UM  | UM  | UM   | UM  |
| AT3G48450 | UM  | UM   | UM  | UM  | UM  | UM  | UM   | UM  |
| AT3G48460 | UM  | UM   | UM  | UM  | UM  | UM  | UM   | UM  |
| AT3G48470 | gbM | gbM  | gbM | gbM | gbM | gbM | mCHH | gbM |
| AT3G48480 | UM  | UM   | UM  | UM  | UM  | UM  | UM   | UM  |
| AT3G48490 | UM  | UM   | UM  | UM  | UM  | UM  | UM   | UM  |
| AT3G48500 | UM  | UM   | UM  | UM  | UM  | UM  | UM   | UM  |
| AT3G48510 | UM  | UM   | UM  | UM  | UM  | UM  | UM   | UM  |
| AT3G48520 | UM  | UM   | UM  | UM  | UM  | UM  | UM   | UM  |
| AT3G48530 | UM  | UM   | UM  | UM  | UM  | UM  | UM   | UM  |
| AT3G48540 | UM  | UM   | UM  | UM  | UM  | UM  | UM   | UM  |
| AT3G48550 | UM  | UM   | UM  | UM  | UM  | UM  | UM   | UM  |
| AT3G48560 | UM  | UM   | UM  | UM  | UM  | UM  | UM   | UM  |
| AT3G48570 | UM  | UM   | UM  | UM  | UM  | UM  | UM   | UM  |
| AT3G48580 | UM  | UM   | UM  | UM  | UM  | UM  | UM   | UM  |
| AT3G48590 | UM  | UM   | UM  | UM  | UM  | UM  | UM   | UM  |
| AT3G48600 | UM  | UM   | UM  | UM  | UM  | UM  | UM   | UM  |
| AT3G48610 | UM  | UM   | UM  | UM  | UM  | UM  | UM   | UM  |
| AT3G48620 | UM  | UM   | UM  | UM  | UM  | UM  | UM   | UM  |
| AT3G48630 | UM  | UM   | UM  | UM  | UM  | UM  | UM   | UM  |
| AT3G48640 | UM  | UM   | UM  | UM  | UM  | UM  | UM   | UM  |

|           |      |      |      |      |      |      |      |      |
|-----------|------|------|------|------|------|------|------|------|
| AT3G48660 | UM   |
| AT3G48670 | gbM  | mCHH | gbM  | gbM  | gbM  | gbM  | mCHH | gbM  |
| AT3G48675 | UM   |
| AT3G48680 | UM   |
| AT3G48690 | UM   |
| AT3G48700 | UM   |
| AT3G48710 | UM   | mCHH | mCHG | UM   | UM   | UM   | mCHG | UM   |
| AT3G48720 | UM   |
| AT3G48730 | gbM  | gbM  | gbM  | UM   | gbM  | gbM  | gbM  | gbM  |
| AT3G48740 | UM   |
| AT3G48750 | UM   | gbM  | gbM  | UM   | gbM  | UM   | UM   | UM   |
| AT3G48760 | gbM  | gbM  | UM   | UM   | gbM  | UM   | gbM  | UM   |
| AT3G48770 | UM   | UM   | UM   | UM   | UM   | UM   | mCHH | UM   |
| AT3G48780 | gbM  | gbM  | gbM  | UM   | UM   | UM   | gbM  | UM   |
| AT3G48790 | UM   |
| AT3G48800 | UM   |
| AT3G48810 | gbM  |
| AT3G48820 | UM   |
| AT3G48830 | gbM  | gbM  | gbM  | gbM  | gbM  | gbM  | mCHH | gbM  |
| AT3G48840 | UM   |
| AT3G48850 | UM   |
| AT3G48860 | UM   | gbM  | gbM  | UM   | UM   | gbM  | UM   | UM   |
| AT3G48870 | gbM  |
| AT3G48880 | gbM  |
| AT3G48890 | UM   |
| AT3G48900 | UM   |
| AT3G48920 | UM   |
| AT3G48930 | UM   |
| AT3G48940 | UM   |
| AT3G48950 | UM   |
| AT3G48960 | UM   |
| AT3G48970 | UM   |
| AT3G48980 | UM   |
| AT3G48990 | UM   |
| AT3G49000 | UM   |
| AT3G49010 | UM   |
| AT3G49020 | UM   |
| AT3G49030 | UM   |
| AT3G49040 | UM   | UM   | UM   | UM   | UM   | UM   | mCHH | UM   |
| AT3G49050 | UM   |
| AT3G49051 | UM   |
| AT3G49055 | UM   |
| AT3G49060 | gbM  | gbM  | gbM  | gbM  | gbM  | gbM  | mCHH | gbM  |
| AT3G49070 | mCHH | mCHH | mCHH | mCHG | mCHG | mCHH | mCHH | mCHG |
| AT3G49080 | UM   | mCHG | UM   | UM   | UM   | UM   | gbM  | UM   |
| AT3G49100 | UM   |
| AT3G49110 | UM   |
| AT3G49115 | UM   |



|           |      |      |      |      |     |      |      |      |
|-----------|------|------|------|------|-----|------|------|------|
| AT3G49570 | UM   | UM   | UM   | UM   | UM  | UM   | UM   | UM   |
| AT3G49580 | UM   | UM   | UM   | UM   | UM  | UM   | UM   | UM   |
| AT3G49590 | UM   | UM   | UM   | UM   | UM  | UM   | UM   | UM   |
| AT3G49600 | gbM  | gbM  | gbM  | gbM  | gbM | gbM  | gbM  | gbM  |
| AT3G49601 | mCHH | mCHG | mCHH | UM   | UM  | UM   | mCHG | UM   |
| AT3G49610 | UM   | UM   | UM   | UM   | UM  | UM   | UM   | UM   |
| AT3G49620 | UM   | UM   | UM   | UM   | UM  | UM   | UM   | UM   |
| AT3G49630 | UM   | UM   | UM   | UM   | UM  | UM   | UM   | UM   |
| AT3G49640 | UM   | gbM  | UM   | UM   | UM  | UM   | gbM  | UM   |
| AT3G49645 | UM   | UM   | UM   | UM   | UM  | UM   | UM   | UM   |
| AT3G49650 | gbM  | gbM  | gbM  | gbM  | gbM | gbM  | mCHH | gbM  |
| AT3G49660 | UM   | UM   | UM   | UM   | UM  | UM   | UM   | UM   |
| AT3G49670 | UM   | UM   | UM   | UM   | UM  | UM   | mCHH | UM   |
| AT3G49680 | UM   | UM   | UM   | UM   | UM  | UM   | UM   | UM   |
| AT3G49690 | UM   | UM   | UM   | UM   | UM  | UM   | mCHH | UM   |
| AT3G49700 | UM   | UM   | UM   | UM   | UM  | UM   | UM   | UM   |
| AT3G49710 | gbM  | gbM  | gbM  | gbM  | gbM | UM   | gbM  | gbM  |
| AT3G49720 | UM   | UM   | UM   | UM   | UM  | UM   | UM   | UM   |
| AT3G49725 | UM   | UM   | UM   | UM   | UM  | UM   | mCHH | UM   |
| AT3G49730 | UM   | UM   | UM   | UM   | UM  | UM   | UM   | UM   |
| AT3G49740 | UM   | UM   | UM   | UM   | UM  | UM   | UM   | UM   |
| AT3G49744 | UM   | UM   | UM   | UM   | UM  | UM   | UM   | UM   |
| AT3G49750 | UM   | UM   | UM   | UM   | UM  | UM   | UM   | UM   |
| AT3G49760 | UM   | UM   | UM   | UM   | UM  | UM   | UM   | UM   |
| AT3G49770 | UM   | UM   | UM   | UM   | UM  | UM   | UM   | UM   |
| AT3G49780 | UM   | UM   | UM   | UM   | UM  | UM   | UM   | UM   |
| AT3G49790 | UM   | UM   | UM   | UM   | UM  | UM   | UM   | UM   |
| AT3G49796 | UM   | UM   | UM   | UM   | UM  | UM   | UM   | UM   |
| AT3G49800 | UM   | UM   | UM   | UM   | UM  | UM   | UM   | UM   |
| AT3G49810 | UM   | UM   | UM   | UM   | UM  | UM   | UM   | UM   |
| AT3G49820 | UM   | UM   | UM   | UM   | UM  | UM   | UM   | UM   |
| AT3G49830 | UM   | UM   | UM   | UM   | UM  | UM   | UM   | UM   |
| AT3G49840 | UM   | UM   | UM   | UM   | UM  | UM   | UM   | UM   |
| AT3G49845 | UM   | UM   | UM   | UM   | UM  | UM   | UM   | UM   |
| AT3G49850 | UM   | UM   | UM   | UM   | UM  | UM   | UM   | UM   |
| AT3G49860 | UM   | UM   | UM   | UM   | UM  | UM   | UM   | UM   |
| AT3G49870 | UM   | UM   | UM   | UM   | UM  | UM   | UM   | UM   |
| AT3G49880 | gbM  | gbM  | gbM  | gbM  | gbM | gbM  | gbM  | gbM  |
| AT3G49890 | UM   | UM   | UM   | UM   | UM  | UM   | UM   | UM   |
| AT3G49900 | UM   | UM   | UM   | UM   | UM  | UM   | mCHH | UM   |
| AT3G49910 | UM   | UM   | UM   | UM   | UM  | UM   | UM   | UM   |
| AT3G49920 | UM   | UM   | UM   | UM   | UM  | UM   | UM   | UM   |
| AT3G49930 | UM   | UM   | UM   | UM   | UM  | UM   | UM   | UM   |
| AT3G49940 | UM   | UM   | UM   | UM   | UM  | UM   | UM   | UM   |
| AT3G49950 | UM   | UM   | UM   | UM   | UM  | UM   | UM   | UM   |
| AT3G49960 | UM   | UM   | UM   | UM   | UM  | UM   | UM   | UM   |
| AT3G49970 | UM   | UM   | UM   | UM   | UM  | UM   | mCHH | UM   |
| AT3G49980 | mCHH | mCHH | mCHH | mCHG | UM  | mCHH | mCHH | mCHG |



|           |      |      |      |      |      |      |      |      |
|-----------|------|------|------|------|------|------|------|------|
| AT3G50430 | UM   |
| AT3G50440 | UM   |
| AT3G50450 | UM   |
| AT3G50460 | UM   |
| AT3G50470 | UM   |
| AT3G50480 | mCHH | mCHH | mCHH | UM   | UM   | UM   | mCHH | UM   |
| AT3G50500 | UM   | gbM  | UM   | UM   | UM   | gbM  | UM   | UM   |
| AT3G50510 | UM   |
| AT3G50520 | UM   |
| AT3G50530 | UM   |
| AT3G50540 | mCHH |
| AT3G50550 | UM   |
| AT3G50560 | UM   |
| AT3G50570 | UM   |
| AT3G50580 | UM   |
| AT3G50590 | gbM  | gbM  | gbM  | gbM  | gbM  | gbM  | mCHH | gbM  |
| AT3G50610 | UM   |
| AT3G50620 | gbM  | gbM  | UM   | UM   | UM   | UM   | gbM  | UM   |
| AT3G50630 | UM   |
| AT3G50640 | UM   |
| AT3G50650 | UM   |
| AT3G50651 | UM   |
| AT3G50660 | UM   | UM   | UM   | UM   | UM   | UM   | mCHH | UM   |
| AT3G50670 | UM   | gbM  | gbM  | UM   | UM   | UM   | gbM  | UM   |
| AT3G50674 | UM   | mCHH | UM   | UM   | UM   | gbM  | gbM  | UM   |
| AT3G50682 | UM   |
| AT3G50685 | UM   |
| AT3G50690 | UM   | gbM  | UM   | UM   | UM   | UM   | UM   | UM   |
| AT3G50695 | UM   |
| AT3G50700 | UM   |
| AT3G50710 | UM   | mCHH | UM   | UM   | UM   | UM   | mCHH | UM   |
| AT3G50720 | UM   |
| AT3G50730 | UM   |
| AT3G50740 | UM   |
| AT3G50750 | UM   |
| AT3G50751 | UM   |
| AT3G50760 | UM   |
| AT3G50764 | UM   |
| AT3G50770 | UM   | mCHH | mCHH | UM   | UM   | UM   | mCHH | UM   |
| AT3G50780 | UM   |
| AT3G50790 | UM   |
| AT3G50800 | UM   |
| AT3G50808 | mCHH | mCHH | mCHH | mCHH | mCHH | UM   | mCHH | mCHH |
| AT3G50810 | UM   |
| AT3G50820 | UM   |
| AT3G50830 | UM   |
| AT3G50840 | UM   |
| AT3G50845 | UM   |

|           |      |      |      |     |     |     |      |     |
|-----------|------|------|------|-----|-----|-----|------|-----|
| AT3G50850 | UM   | UM   | UM   | UM  | UM  | UM  | UM   | UM  |
| AT3G50860 | UM   | UM   | UM   | UM  | UM  | UM  | UM   | UM  |
| AT3G50870 | UM   | UM   | UM   | UM  | UM  | UM  | UM   | UM  |
| AT3G50880 | UM   | UM   | UM   | UM  | UM  | UM  | UM   | UM  |
| AT3G50890 | UM   | UM   | UM   | UM  | UM  | UM  | UM   | UM  |
| AT3G50900 | UM   | UM   | UM   | UM  | UM  | UM  | UM   | UM  |
| AT3G50910 | UM   | gbM  | UM   | UM  | UM  | UM  | UM   | UM  |
| AT3G50920 | UM   | UM   | UM   | UM  | UM  | UM  | UM   | UM  |
| AT3G50925 | UM   | UM   | UM   | UM  | UM  | UM  | UM   | UM  |
| AT3G50930 | UM   | UM   | UM   | UM  | UM  | UM  | mCHH | UM  |
| AT3G50940 | UM   | UM   | UM   | UM  | UM  | UM  | UM   | UM  |
| AT3G50950 | gbM  | mCHH | gbM  | gbM | gbM | gbM | mCHG | gbM |
| AT3G50960 | UM   | UM   | UM   | UM  | UM  | UM  | UM   | UM  |
| AT3G50970 | UM   | UM   | UM   | UM  | UM  | UM  | mCHH | UM  |
| AT3G50980 | UM   | UM   | UM   | UM  | UM  | UM  | UM   | UM  |
| AT3G50990 | UM   | UM   | UM   | UM  | UM  | UM  | UM   | UM  |
| AT3G51000 | UM   | UM   | UM   | UM  | UM  | UM  | UM   | UM  |
| AT3G51010 | UM   | UM   | UM   | UM  | UM  | UM  | UM   | UM  |
| AT3G51020 | UM   | UM   | UM   | UM  | UM  | UM  | UM   | UM  |
| AT3G51030 | UM   | UM   | UM   | UM  | UM  | UM  | UM   | UM  |
| AT3G51040 | UM   | UM   | UM   | UM  | UM  | UM  | UM   | UM  |
| AT3G51050 | gbM  | gbM  | gbM  | gbM | gbM | gbM | gbM  | gbM |
| AT3G51057 | UM   | UM   | UM   | UM  | UM  | UM  | UM   | UM  |
| AT3G51060 | UM   | UM   | UM   | UM  | UM  | UM  | UM   | UM  |
| AT3G51070 | mCHH | mCHH | mCHH | UM  | UM  | UM  | mCHH | UM  |
| AT3G51080 | UM   | UM   | UM   | UM  | UM  | UM  | UM   | UM  |
| AT3G51090 | UM   | UM   | UM   | UM  | UM  | UM  | mCHH | UM  |
| AT3G51100 | UM   | UM   | UM   | UM  | UM  | UM  | UM   | UM  |
| AT3G51110 | UM   | UM   | UM   | UM  | UM  | UM  | UM   | UM  |
| AT3G51120 | gbM  | gbM  | gbM  | gbM | gbM | gbM | gbM  | gbM |
| AT3G51130 | UM   | mCHH | UM   | UM  | UM  | UM  | mCHH | UM  |
| AT3G51140 | UM   | UM   | UM   | UM  | UM  | UM  | UM   | UM  |
| AT3G51150 | UM   | gbM  | UM   | UM  | UM  | UM  | mCHH | UM  |
| AT3G51160 | UM   | UM   | UM   | UM  | UM  | UM  | UM   | UM  |
| AT3G51171 | UM   | UM   | UM   | UM  | UM  | UM  | UM   | UM  |
| AT3G51180 | UM   | UM   | UM   | UM  | UM  | UM  | UM   | UM  |
| AT3G51190 | UM   | UM   | UM   | UM  | UM  | UM  | UM   | UM  |
| AT3G51200 | UM   | UM   | UM   | UM  | UM  | UM  | UM   | UM  |
| AT3G51210 | UM   | UM   | UM   | UM  | UM  | UM  | UM   | UM  |
| AT3G51220 | UM   | UM   | UM   | UM  | UM  | UM  | UM   | UM  |
| AT3G51230 | UM   | UM   | UM   | UM  | UM  | UM  | UM   | UM  |
| AT3G51240 | UM   | UM   | UM   | UM  | UM  | UM  | UM   | UM  |
| AT3G51250 | UM   | UM   | UM   | UM  | UM  | UM  | UM   | UM  |
| AT3G51260 | UM   | UM   | UM   | UM  | UM  | UM  | UM   | UM  |
| AT3G51270 | UM   | UM   | UM   | UM  | UM  | UM  | UM   | UM  |
| AT3G51280 | UM   | UM   | UM   | UM  | UM  | UM  | UM   | UM  |
| AT3G51290 | UM   | UM   | UM   | UM  | UM  | UM  | UM   | UM  |
| AT3G51300 | UM   | UM   | UM   | UM  | UM  | UM  | UM   | UM  |

|           |      |      |     |     |     |     |      |     |
|-----------|------|------|-----|-----|-----|-----|------|-----|
| AT3G51310 | gbM  | mCHH | gbM | UM  | gbM | gbM | gbM  | UM  |
| AT3G51320 | UM   | UM   | UM  | UM  | UM  | UM  | UM   | UM  |
| AT3G51325 | UM   | UM   | UM  | UM  | UM  | UM  | UM   | UM  |
| AT3G51330 | UM   | UM   | UM  | UM  | UM  | UM  | UM   | UM  |
| AT3G51340 | UM   | UM   | UM  | UM  | UM  | UM  | UM   | UM  |
| AT3G51350 | UM   | UM   | UM  | UM  | UM  | UM  | UM   | UM  |
| AT3G51360 | UM   | UM   | UM  | UM  | UM  | UM  | UM   | UM  |
| AT3G51370 | UM   | UM   | UM  | UM  | UM  | UM  | UM   | UM  |
| AT3G51380 | UM   | UM   | UM  | UM  | UM  | UM  | UM   | UM  |
| AT3G51390 | UM   | UM   | UM  | UM  | UM  | UM  | mCHH | UM  |
| AT3G51400 | UM   | UM   | UM  | UM  | UM  | UM  | UM   | UM  |
| AT3G51410 | UM   | UM   | UM  | UM  | UM  | UM  | UM   | UM  |
| AT3G51420 | UM   | UM   | UM  | UM  | UM  | UM  | UM   | UM  |
| AT3G51430 | UM   | UM   | UM  | UM  | UM  | UM  | UM   | UM  |
| AT3G51440 | UM   | UM   | UM  | UM  | UM  | UM  | UM   | UM  |
| AT3G51450 | UM   | UM   | UM  | UM  | UM  | UM  | UM   | UM  |
| AT3G51460 | UM   | UM   | UM  | UM  | UM  | UM  | UM   | UM  |
| AT3G51470 | UM   | UM   | UM  | UM  | UM  | UM  | UM   | UM  |
| AT3G51480 | gbM  | UM   | UM  | gbM | UM  | UM  | gbM  | gbM |
| AT3G51490 | gbM  | gbM  | gbM | gbM | gbM | gbM | gbM  | gbM |
| AT3G51500 | UM   | UM   | UM  | UM  | UM  | UM  | UM   | UM  |
| AT3G51510 | UM   | UM   | UM  | UM  | UM  | UM  | UM   | UM  |
| AT3G51520 | UM   | UM   | UM  | UM  | UM  | UM  | UM   | UM  |
| AT3G51530 | UM   | UM   | UM  | UM  | UM  | UM  | mCHH | UM  |
| AT3G51540 | UM   | UM   | UM  | UM  | UM  | UM  | UM   | UM  |
| AT3G51550 | gbM  | mCHH | gbM | gbM | gbM | gbM | gbM  | gbM |
| AT3G51560 | UM   | mCHH | UM  | UM  | UM  | UM  | UM   | UM  |
| AT3G51570 | UM   | UM   | UM  | UM  | UM  | UM  | mCHH | UM  |
| AT3G51580 | UM   | UM   | UM  | UM  | UM  | UM  | UM   | UM  |
| AT3G51590 | UM   | UM   | UM  | UM  | UM  | UM  | UM   | UM  |
| AT3G51600 | UM   | UM   | UM  | UM  | UM  | UM  | UM   | UM  |
| AT3G51610 | UM   | UM   | UM  | UM  | UM  | UM  | UM   | UM  |
| AT3G51620 | gbM  | gbM  | gbM | gbM | gbM | gbM | gbM  | gbM |
| AT3G51630 | gbM  | mCHH | gbM | gbM | gbM | gbM | gbM  | gbM |
| AT3G51632 | mCHH | UM   | UM  | UM  | UM  | UM  | UM   | UM  |
| AT3G51636 | UM   | UM   | UM  | UM  | UM  | UM  | UM   | UM  |
| AT3G51640 | gbM  | gbM  | gbM | UM  | UM  | UM  | gbM  | UM  |
| AT3G51642 | UM   | UM   | UM  | UM  | UM  | UM  | UM   | UM  |
| AT3G51644 | UM   | UM   | UM  | UM  | UM  | UM  | UM   | UM  |
| AT3G51650 | gbM  | gbM  | gbM | gbM | gbM | gbM | gbM  | UM  |
| AT3G51660 | UM   | UM   | UM  | UM  | UM  | UM  | UM   | UM  |
| AT3G51670 | UM   | UM   | UM  | UM  | UM  | UM  | UM   | UM  |
| AT3G51680 | UM   | UM   | UM  | UM  | UM  | UM  | UM   | UM  |
| AT3G51690 | UM   | UM   | UM  | UM  | UM  | UM  | UM   | UM  |
| AT3G51700 | UM   | UM   | UM  | UM  | UM  | UM  | UM   | UM  |
| AT3G51710 | UM   | UM   | UM  | UM  | UM  | UM  | UM   | UM  |
| AT3G51720 | UM   | UM   | UM  | UM  | UM  | UM  | UM   | UM  |
| AT3G51730 | UM   | UM   | UM  | UM  | UM  | gbM | UM   | UM  |



|           |     |      |     |     |     |     |      |     |
|-----------|-----|------|-----|-----|-----|-----|------|-----|
| AT3G51740 | UM  | UM   | UM  | UM  | UM  | UM  | UM   | UM  |
| AT3G51750 | UM  | UM   | UM  | UM  | UM  | UM  | UM   | UM  |
| AT3G51760 | UM  | UM   | UM  | UM  | UM  | UM  | UM   | UM  |
| AT3G51770 | UM  | UM   | UM  | UM  | UM  | UM  | UM   | UM  |
| AT3G51780 | UM  | UM   | UM  | UM  | UM  | UM  | UM   | UM  |
| AT3G51790 | UM  | UM   | UM  | UM  | UM  | UM  | UM   | UM  |
| AT3G51800 | UM  | UM   | UM  | UM  | UM  | UM  | UM   | UM  |
| AT3G51810 | UM  | UM   | UM  | UM  | UM  | UM  | UM   | UM  |
| AT3G51820 | UM  | UM   | UM  | UM  | UM  | UM  | UM   | UM  |
| AT3G51830 | UM  | UM   | UM  | UM  | UM  | UM  | UM   | UM  |
| AT3G51840 | UM  | UM   | UM  | UM  | UM  | UM  | UM   | UM  |
| AT3G51850 | UM  | UM   | UM  | UM  | UM  | UM  | UM   | UM  |
| AT3G51860 | UM  | UM   | UM  | UM  | UM  | UM  | UM   | UM  |
| AT3G51870 | UM  | UM   | UM  | UM  | UM  | UM  | UM   | UM  |
| AT3G51880 | UM  | UM   | UM  | UM  | UM  | UM  | UM   | UM  |
| AT3G51890 | UM  | UM   | UM  | UM  | UM  | UM  | UM   | UM  |
| AT3G51895 | UM  | UM   | UM  | UM  | UM  | UM  | UM   | UM  |
| AT3G51910 | UM  | UM   | UM  | UM  | UM  | UM  | mCHH | UM  |
| AT3G51915 | UM  | UM   | UM  | UM  | UM  | UM  | UM   | UM  |
| AT3G51920 | UM  | UM   | UM  | UM  | UM  | UM  | UM   | UM  |
| AT3G51930 | UM  | UM   | UM  | UM  | UM  | UM  | UM   | UM  |
| AT3G51940 | UM  | UM   | UM  | UM  | UM  | UM  | UM   | UM  |
| AT3G51950 | UM  | UM   | UM  | UM  | UM  | UM  | UM   | UM  |
| AT3G51960 | UM  | UM   | UM  | UM  | UM  | UM  | UM   | UM  |
| AT3G51970 | UM  | UM   | UM  | UM  | UM  | UM  | UM   | UM  |
| AT3G51980 | UM  | UM   | UM  | UM  | UM  | UM  | UM   | UM  |
| AT3G51990 | UM  | UM   | UM  | UM  | UM  | UM  | UM   | UM  |
| AT3G52000 | UM  | UM   | UM  | UM  | UM  | UM  | UM   | UM  |
| AT3G52010 | UM  | UM   | UM  | UM  | UM  | UM  | UM   | UM  |
| AT3G52020 | UM  | UM   | UM  | UM  | UM  | UM  | UM   | UM  |
| AT3G52030 | UM  | UM   | UM  | UM  | UM  | UM  | UM   | UM  |
| AT3G52040 | UM  | UM   | UM  | UM  | UM  | UM  | UM   | UM  |
| AT3G52050 | UM  | gbM  | UM  | UM  | UM  | UM  | gbM  | UM  |
| AT3G52060 | UM  | UM   | UM  | UM  | UM  | UM  | UM   | UM  |
| AT3G52070 | UM  | UM   | UM  | UM  | UM  | UM  | UM   | UM  |
| AT3G52080 | UM  | UM   | UM  | UM  | UM  | UM  | UM   | UM  |
| AT3G52090 | UM  | UM   | UM  | UM  | UM  | UM  | UM   | UM  |
| AT3G52100 | UM  | UM   | UM  | UM  | UM  | UM  | mCHH | UM  |
| AT3G52105 | UM  | UM   | UM  | UM  | UM  | UM  | UM   | UM  |
| AT3G52110 | UM  | UM   | UM  | UM  | UM  | UM  | mCHH | UM  |
| AT3G52115 | UM  | UM   | UM  | UM  | UM  | UM  | UM   | UM  |
| AT3G52120 | UM  | UM   | UM  | UM  | UM  | UM  | UM   | UM  |
| AT3G52130 | gbM | UM   | UM  | UM  | UM  | UM  | gbM  | UM  |
| AT3G52140 | gbM | mCHH | gbM | gbM | gbM | gbM | mCHH | gbM |
| AT3G52150 | UM  | UM   | UM  | UM  | UM  | UM  | UM   | UM  |
| AT3G52155 | UM  | UM   | UM  | UM  | UM  | UM  | UM   | UM  |
| AT3G52160 | gbM | gbM  | gbM | gbM | gbM | UM  | gbM  | gbM |
| AT3G52170 | gbM | gbM  | gbM | gbM | UM  | gbM | mCHH | UM  |

|           |     |     |     |     |     |     |      |     |
|-----------|-----|-----|-----|-----|-----|-----|------|-----|
| AT3G52180 | UM   | UM  |
| AT3G52190 | UM   | UM  |
| AT3G52200 | UM   | UM  |
| AT3G52210 | UM   | UM  |
| AT3G52220 | UM  | gbM | UM  | UM  | UM  | UM  | UM   | UM  |
| AT3G52230 | UM   | UM  |
| AT3G52240 | gbM  | gbM |
| AT3G52250 | gbM  | gbM |
| AT3G52260 | UM   | UM  |
| AT3G52270 | UM   | UM  |
| AT3G52280 | UM   | UM  |
| AT3G52290 | UM   | UM  |
| AT3G52300 | UM   | UM  |
| AT3G52302 | UM   | UM  |
| AT3G52310 | UM   | UM  |
| AT3G52320 | UM   | UM  |
| AT3G52330 | UM   | UM  |
| AT3G52340 | UM  | UM  | UM  | UM  | UM  | UM  | mCHH | UM  |
| AT3G52350 | UM   | UM  |
| AT3G52360 | UM   | UM  |
| AT3G52370 | UM   | UM  |
| AT3G52380 | UM   | UM  |
| AT3G52390 | UM   | UM  |
| AT3G52400 | UM   | UM  |
| AT3G52420 | UM   | UM  |
| AT3G52430 | UM   | UM  |
| AT3G52440 | UM   | UM  |
| AT3G52450 | UM   | UM  |
| AT3G52460 | UM   | UM  |
| AT3G52470 | UM   | UM  |
| AT3G52480 | UM   | UM  |
| AT3G52490 | UM  | UM  | UM  | UM  | UM  | UM  | mCHH | UM  |
| AT3G52500 | UM   | UM  |
| AT3G52510 | UM   | UM  |
| AT3G52520 | UM   | UM  |
| AT3G52525 | UM   | UM  |
| AT3G52530 | UM   | UM  |
| AT3G52540 | UM   | UM  |
| AT3G52550 | UM   | UM  |
| AT3G52560 | UM   | UM  |
| AT3G52561 | UM   | UM  |
| AT3G52570 | UM   | UM  |
| AT3G52580 | UM   | UM  |
| AT3G52590 | UM   | UM  |
| AT3G52600 | UM   | UM  |
| AT3G52610 | UM   | UM  |
| AT3G52620 | UM   | gbM |
| AT3G52630 | UM   | UM  |



|           |      |      |      |      |      |      |      |      |
|-----------|------|------|------|------|------|------|------|------|
| AT3G53090 | gbM  | gbM  | gbM  | UM   | gbM  | UM   | mCHH | UM   |
| AT3G53100 | gbM  |
| AT3G53110 | UM   |
| AT3G53120 | UM   |
| AT3G53130 | UM   |
| AT3G53140 | UM   |
| AT3G53150 | UM   |
| AT3G53160 | UM   |
| AT3G53170 | UM   |
| AT3G53180 | UM   |
| AT3G53190 | UM   |
| AT3G53200 | UM   |
| AT3G53210 | UM   |
| AT3G53220 | UM   |
| AT3G53230 | UM   |
| AT3G53232 | UM   |
| AT3G53235 | UM   |
| AT3G53240 | gbM  | mCHH | gbM  | gbM  | gbM  | gbM  | mCHH | gbM  |
| AT3G53250 | UM   |
| AT3G53260 | UM   |
| AT3G53270 | UM   |
| AT3G53280 | UM   |
| AT3G53290 | UM   |
| AT3G53294 | UM   |
| AT3G53300 | UM   |
| AT3G53305 | mCHH | mCHG |
| AT3G53310 | UM   |
| AT3G53320 | UM   |
| AT3G53330 | UM   |
| AT3G53340 | UM   | mCHH | UM   | UM   | UM   | UM   | UM   | UM   |
| AT3G53342 | mCHH | mCHH | mCHH | gbM  | mCHH | mCHH | mCHH | mCHG |
| AT3G53350 | UM   | UM   | UM   | UM   | UM   | UM   | mCHH | UM   |
| AT3G53360 | gbM  | gbM  | gbM  | gbM  | UM   | UM   | gbM  | UM   |
| AT3G53370 | UM   |
| AT3G53380 | UM   |
| AT3G53390 | gbM  | gbM  | UM   | UM   | UM   | gbM  | gbM  | UM   |
| AT3G53400 | UM   |
| AT3G53402 | UM   |
| AT3G53410 | UM   |
| AT3G53420 | UM   |
| AT3G53430 | UM   |
| AT3G53440 | UM   |
| AT3G53450 | UM   |
| AT3G53460 | UM   |
| AT3G53470 | UM   |
| AT3G53480 | UM   |
| AT3G53490 | UM   |
| AT3G53500 | gbM  |





|           |      |      |      |      |      |      |      |      |
|-----------|------|------|------|------|------|------|------|------|
| AT3G54460 | gbM  | gbM  | gbM  | gbM  | UM   | gbM  | gbM  | UM   |
| AT3G54470 | UM   |
| AT3G54480 | gbM  | gbM  | UM   | UM   | UM   | UM   | gbM  | UM   |
| AT3G54490 | UM   |
| AT3G54500 | UM   |
| AT3G54510 | UM   |
| AT3G54520 | UM   |
| AT3G54530 | UM   | UM   | UM   | UM   | UM   | UM   | mCHH | UM   |
| AT3G54540 | gbM  | mCHH | gbM  | gbM  | gbM  | gbM  | gbM  | gbM  |
| AT3G54550 | UM   |
| AT3G54560 | UM   | UM   | UM   | UM   | UM   | UM   | mCHH | UM   |
| AT3G54570 | UM   |
| AT3G54580 | mCHH |
| AT3G54590 | mCHH |
| AT3G54600 | UM   |
| AT3G54610 | UM   |
| AT3G54620 | UM   |
| AT3G54630 | UM   |
| AT3G54640 | UM   |
| AT3G54650 | UM   |
| AT3G54660 | UM   |
| AT3G54670 | mCHG | mCHH | gbM  | gbM  | UM   | gbM  | mCHG | gbM  |
| AT3G54680 | UM   |
| AT3G54690 | UM   | UM   | UM   | UM   | UM   | UM   | mCHH | UM   |
| AT3G54700 | UM   | UM   | UM   | UM   | UM   | UM   | mCHH | UM   |
| AT3G54710 | UM   |
| AT3G54720 | UM   |
| AT3G54730 | mCHH |
| AT3G54740 | gbM  | gbM  | gbM  | UM   | gbM  | gbM  | gbM  | gbM  |
| AT3G54750 | gbM  |
| AT3G54760 | gbM  | mCHH | gbM  | gbM  | gbM  | gbM  | mCHH | gbM  |
| AT3G54770 | UM   | mCHH | UM   | UM   | UM   | UM   | UM   | UM   |
| AT3G54780 | UM   |
| AT3G54790 | gbM  |
| AT3G54800 | UM   | UM   | UM   | UM   | UM   | UM   | mCHH | UM   |
| AT3G54802 | UM   |
| AT3G54804 | UM   |
| AT3G54810 | UM   |
| AT3G54820 | UM   |
| AT3G54826 | UM   |
| AT3G54830 | UM   |
| AT3G54840 | UM   |
| AT3G54850 | gbM  |
| AT3G54860 | gbM  | mCHH | UM   | UM   | UM   | UM   | mCHH | UM   |
| AT3G54870 | UM   | UM   | UM   | UM   | UM   | UM   | mCHH | UM   |
| AT3G54880 | UM   |
| AT3G54890 | UM   |
| AT3G54900 | UM   |

|           |      |      |      |      |      |      |      |      |
|-----------|------|------|------|------|------|------|------|------|
| AT3G54910 | UM   |
| AT3G54920 | UM   |
| AT3G54925 | mCHH |
| AT3G54930 | UM   |
| AT3G54940 | UM   |
| AT3G54950 | UM   |
| AT3G54960 | UM   |
| AT3G54970 | UM   |
| AT3G54980 | gbM  | gbM  | gbM  | gbM  | UM   | gbM  | gbM  | UM   |
| AT3G54990 | UM   |
| AT3G55000 | UM   |
| AT3G55005 | UM   | UM   | UM   | UM   | UM   | UM   | mCHH | UM   |
| AT3G55010 | UM   |
| AT3G55020 | gbM  | gbM  | gbM  | gbM  | gbM  | gbM  | mCHH | gbM  |
| AT3G55030 | UM   |
| AT3G55040 | UM   |
| AT3G55050 | UM   | gbM  | UM   | UM   | UM   | gbM  | UM   | UM   |
| AT3G55060 | UM   | mCHH | UM   | UM   | UM   | UM   | mCHH | UM   |
| AT3G55070 | UM   |
| AT3G55080 | UM   |
| AT3G55090 | UM   |
| AT3G55100 | UM   |
| AT3G55110 | UM   |
| AT3G55120 | UM   |
| AT3G55130 | UM   |
| AT3G55140 | UM   |
| AT3G55150 | UM   |
| AT3G55160 | gbM  | mCHH | gbM  | gbM  | gbM  | gbM  | mCHH | gbM  |
| AT3G55170 | UM   |
| AT3G55180 | UM   |
| AT3G55190 | UM   |
| AT3G55200 | UM   |
| AT3G55210 | UM   |
| AT3G55220 | UM   |
| AT3G55230 | UM   |
| AT3G55240 | UM   |
| AT3G55250 | UM   |
| AT3G55252 | mCHH | mCHH | mCHH | mCHG | mCHH | mCHH | mCHH | mCHH |
| AT3G55254 | mCHH |
| AT3G55260 | UM   |
| AT3G55270 | gbM  |
| AT3G55280 | UM   |
| AT3G55290 | UM   |
| AT3G55310 | UM   |
| AT3G55320 | gbM  | gbM  | gbM  | gbM  | gbM  | gbM  | mCHH | gbM  |
| AT3G55330 | UM   |
| AT3G55340 | UM   | mCHH | UM   | UM   | UM   | UM   | UM   | UM   |
| AT3G55350 | gbM  | gbM  | gbM  | gbM  | UM   | gbM  | gbM  | UM   |









|           |     |      |     |     |     |     |      |     |
|-----------|-----|------|-----|-----|-----|-----|------|-----|
| AT3G56730 | UM  | UM   | UM  | UM  | UM  | UM  | UM   | UM  |
| AT3G56740 | UM  | gbM  | gbM | UM  | UM  | UM  | gbM  | UM  |
| AT3G56750 | UM  | UM   | UM  | UM  | UM  | UM  | UM   | UM  |
| AT3G56760 | UM  | UM   | UM  | UM  | UM  | UM  | UM   | UM  |
| AT3G56770 | UM  | UM   | UM  | UM  | UM  | UM  | UM   | UM  |
| AT3G56780 | UM  | UM   | UM  | UM  | UM  | UM  | UM   | UM  |
| AT3G56790 | UM  | UM   | UM  | UM  | UM  | UM  | UM   | UM  |
| AT3G56800 | UM  | UM   | UM  | UM  | UM  | UM  | UM   | UM  |
| AT3G56810 | UM  | UM   | UM  | UM  | UM  | UM  | UM   | UM  |
| AT3G56820 | UM  | UM   | UM  | UM  | UM  | UM  | UM   | UM  |
| AT3G56830 | UM  | UM   | UM  | UM  | UM  | UM  | UM   | UM  |
| AT3G56840 | UM  | UM   | UM  | UM  | UM  | UM  | UM   | UM  |
| AT3G56850 | UM  | UM   | UM  | UM  | UM  | UM  | UM   | UM  |
| AT3G56860 | UM  | UM   | UM  | UM  | UM  | UM  | UM   | UM  |
| AT3G56870 | UM  | UM   | UM  | UM  | UM  | UM  | UM   | UM  |
| AT3G56880 | UM  | UM   | UM  | UM  | UM  | UM  | UM   | UM  |
| AT3G56890 | UM  | UM   | UM  | UM  | UM  | UM  | UM   | UM  |
| AT3G56891 | UM  | UM   | UM  | UM  | UM  | UM  | UM   | UM  |
| AT3G56900 | UM  | UM   | UM  | UM  | UM  | UM  | mCHH | UM  |
| AT3G56910 | UM  | UM   | UM  | UM  | UM  | UM  | UM   | UM  |
| AT3G56920 | UM  | UM   | UM  | UM  | UM  | UM  | UM   | UM  |
| AT3G56930 | UM  | UM   | UM  | UM  | UM  | UM  | UM   | UM  |
| AT3G56940 | UM  | UM   | UM  | UM  | UM  | UM  | UM   | UM  |
| AT3G56950 | UM  | UM   | UM  | UM  | UM  | UM  | UM   | UM  |
| AT3G56960 | gbM | gbM  | gbM | gbM | gbM | gbM | gbM  | gbM |
| AT3G56970 | UM  | UM   | UM  | UM  | UM  | UM  | UM   | UM  |
| AT3G56980 | UM  | UM   | UM  | UM  | UM  | UM  | UM   | UM  |
| AT3G56990 | gbM | gbM  | gbM | gbM | gbM | gbM | mCHH | gbM |
| AT3G57000 | UM  | UM   | UM  | UM  | UM  | UM  | UM   | UM  |
| AT3G57010 | UM  | UM   | UM  | UM  | UM  | UM  | UM   | UM  |
| AT3G57020 | UM  | UM   | UM  | UM  | UM  | UM  | UM   | UM  |
| AT3G57030 | UM  | UM   | UM  | UM  | UM  | UM  | UM   | UM  |
| AT3G57040 | UM  | UM   | UM  | UM  | UM  | UM  | UM   | UM  |
| AT3G57050 | UM  | UM   | UM  | UM  | UM  | UM  | UM   | UM  |
| AT3G57060 | UM  | mCHG | UM  | UM  | UM  | UM  | mCHH | UM  |
| AT3G57062 | UM  | UM   | UM  | UM  | UM  | UM  | UM   | UM  |
| AT3G57070 | UM  | UM   | UM  | UM  | UM  | UM  | UM   | UM  |
| AT3G57072 | UM  | UM   | UM  | UM  | UM  | UM  | UM   | UM  |
| AT3G57080 | UM  | UM   | UM  | UM  | UM  | UM  | UM   | UM  |
| AT3G57090 | UM  | UM   | UM  | UM  | UM  | UM  | UM   | UM  |
| AT3G57100 | UM  | UM   | UM  | UM  | UM  | UM  | UM   | UM  |
| AT3G57110 | UM  | UM   | UM  | UM  | UM  | UM  | UM   | UM  |
| AT3G57120 | UM  | UM   | UM  | UM  | UM  | UM  | UM   | UM  |
| AT3G57130 | UM  | UM   | UM  | UM  | UM  | UM  | UM   | UM  |
| AT3G57140 | UM  | UM   | UM  | UM  | UM  | UM  | UM   | UM  |
| AT3G57150 | UM  | UM   | UM  | UM  | UM  | UM  | UM   | UM  |
| AT3G57160 | UM  | UM   | UM  | UM  | UM  | UM  | UM   | UM  |
| AT3G57170 | gbM | gbM  | gbM | UM  | UM  | UM  | gbM  | UM  |

|           |     |      |     |     |     |     |      |     |
|-----------|-----|------|-----|-----|-----|-----|------|-----|
| AT3G57180 | UM  | UM   | UM  | UM  | UM  | UM  | UM   | UM  |
| AT3G57190 | UM  | UM   | UM  | UM  | UM  | UM  | UM   | UM  |
| AT3G57200 | UM  | mCHH | UM  | UM  | UM  | UM  | UM   | UM  |
| AT3G57210 | UM  | UM   | UM  | UM  | UM  | UM  | UM   | UM  |
| AT3G57220 | UM  | UM   | UM  | UM  | UM  | UM  | mCHH | UM  |
| AT3G57230 | UM  | UM   | UM  | UM  | UM  | UM  | UM   | UM  |
| AT3G57240 | UM  | UM   | UM  | UM  | UM  | UM  | UM   | UM  |
| AT3G57250 | UM  | UM   | UM  | UM  | UM  | UM  | UM   | UM  |
| AT3G57260 | UM  | UM   | UM  | UM  | UM  | UM  | UM   | UM  |
| AT3G57270 | UM  | UM   | UM  | UM  | UM  | UM  | UM   | UM  |
| AT3G57280 | UM  | UM   | UM  | UM  | UM  | UM  | UM   | UM  |
| AT3G57290 | UM  | UM   | UM  | UM  | UM  | UM  | UM   | UM  |
| AT3G57300 | gbM | mCHH | gbM | gbM | gbM | gbM | mCHH | gbM |
| AT3G57310 | UM  | UM   | UM  | UM  | UM  | UM  | UM   | UM  |
| AT3G57320 | UM  | UM   | UM  | UM  | UM  | UM  | UM   | UM  |
| AT3G57330 | UM  | UM   | UM  | UM  | UM  | UM  | UM   | UM  |
| AT3G57340 | UM  | UM   | UM  | UM  | UM  | UM  | UM   | UM  |
| AT3G57350 | UM  | gbM  | UM  | UM  | UM  | UM  | mCHH | UM  |
| AT3G57360 | UM  | UM   | UM  | UM  | UM  | UM  | UM   | UM  |
| AT3G57370 | UM  | UM   | UM  | UM  | UM  | UM  | UM   | UM  |
| AT3G57380 | UM  | UM   | UM  | UM  | UM  | UM  | UM   | UM  |
| AT3G57390 | UM  | UM   | UM  | UM  | UM  | UM  | UM   | UM  |
| AT3G57400 | UM  | UM   | UM  | UM  | UM  | UM  | UM   | UM  |
| AT3G57410 | gbM | gbM  | gbM | gbM | gbM | UM  | gbM  | gbM |
| AT3G57420 | UM  | gbM  | UM  | UM  | UM  | UM  | gbM  | UM  |
| AT3G57430 | UM  | UM   | UM  | UM  | UM  | UM  | UM   | UM  |
| AT3G57440 | UM  | UM   | UM  | UM  | UM  | UM  | UM   | UM  |
| AT3G57450 | UM  | UM   | UM  | UM  | UM  | UM  | UM   | UM  |
| AT3G57460 | UM  | UM   | UM  | UM  | UM  | UM  | UM   | UM  |
| AT3G57470 | UM  | UM   | UM  | UM  | UM  | UM  | mCHH | UM  |
| AT3G57480 | UM  | UM   | UM  | UM  | UM  | UM  | UM   | UM  |
| AT3G57490 | UM  | UM   | UM  | UM  | UM  | UM  | UM   | UM  |
| AT3G57500 | UM  | UM   | UM  | UM  | UM  | UM  | UM   | UM  |
| AT3G57510 | UM  | UM   | UM  | UM  | UM  | UM  | UM   | UM  |
| AT3G57520 | UM  | UM   | UM  | UM  | UM  | UM  | UM   | UM  |
| AT3G57530 | UM  | UM   | UM  | UM  | UM  | UM  | UM   | UM  |
| AT3G57540 | UM  | UM   | UM  | UM  | UM  | UM  | UM   | UM  |
| AT3G57550 | UM  | UM   | UM  | UM  | UM  | UM  | UM   | UM  |
| AT3G57560 | UM  | UM   | UM  | UM  | UM  | UM  | UM   | UM  |
| AT3G57570 | gbM | mCHH | gbM | UM  | UM  | gbM | mCHH | UM  |
| AT3G57580 | UM  | UM   | UM  | UM  | UM  | UM  | UM   | UM  |
| AT3G57590 | UM  | UM   | UM  | UM  | UM  | UM  | UM   | UM  |
| AT3G57600 | UM  | UM   | UM  | UM  | UM  | UM  | UM   | UM  |
| AT3G57610 | UM  | UM   | UM  | UM  | UM  | UM  | UM   | UM  |
| AT3G57620 | UM  | UM   | UM  | UM  | UM  | UM  | UM   | UM  |
| AT3G57630 | UM  | UM   | UM  | UM  | UM  | UM  | UM   | UM  |
| AT3G57640 | UM  | UM   | UM  | UM  | UM  | UM  | UM   | UM  |
| AT3G57650 | UM  | UM   | UM  | UM  | UM  | UM  | UM   | UM  |

|           |      |      |      |      |     |     |      |      |
|-----------|------|------|------|------|-----|-----|------|------|
| AT3G57660 | gbM  | mCHH | gbM  | gbM  | gbM | gbM | mCHH | gbM  |
| AT3G57670 | UM   | UM   | UM   | UM   | UM  | UM  | UM   | UM   |
| AT3G57680 | UM   | UM   | UM   | UM   | UM  | UM  | UM   | UM   |
| AT3G57690 | UM   | UM   | UM   | UM   | UM  | UM  | UM   | UM   |
| AT3G57700 | UM   | UM   | UM   | UM   | UM  | UM  | UM   | UM   |
| AT3G57710 | UM   | UM   | UM   | UM   | UM  | UM  | UM   | UM   |
| AT3G57720 | UM   | UM   | UM   | UM   | UM  | UM  | UM   | UM   |
| AT3G57730 | UM   | UM   | UM   | UM   | UM  | UM  | UM   | UM   |
| AT3G57740 | UM   | UM   | UM   | UM   | UM  | UM  | UM   | UM   |
| AT3G57750 | UM   | UM   | UM   | UM   | UM  | UM  | UM   | UM   |
| AT3G57760 | gbM  | gbM  | gbM  | UM   | UM  | UM  | gbM  | UM   |
| AT3G57770 | UM   | UM   | UM   | UM   | UM  | UM  | UM   | UM   |
| AT3G57780 | UM   | UM   | UM   | UM   | UM  | UM  | UM   | UM   |
| AT3G57785 | UM   | UM   | UM   | UM   | UM  | UM  | UM   | UM   |
| AT3G57790 | UM   | UM   | UM   | UM   | UM  | UM  | UM   | UM   |
| AT3G57800 | UM   | UM   | UM   | UM   | UM  | UM  | UM   | UM   |
| AT3G57810 | mCHG | mCHG | mCHG | mCHG | UM  | gbM | mCHH | mCHG |
| AT3G57830 | UM   | UM   | UM   | UM   | UM  | UM  | UM   | UM   |
| AT3G57840 | UM   | UM   | UM   | UM   | UM  | UM  | UM   | UM   |
| AT3G57850 | UM   | UM   | UM   | UM   | UM  | UM  | UM   | UM   |
| AT3G57860 | UM   | UM   | UM   | UM   | UM  | UM  | UM   | UM   |
| AT3G57870 | UM   | UM   | UM   | UM   | UM  | UM  | UM   | UM   |
| AT3G57880 | gbM  | gbM  | gbM  | gbM  | gbM | gbM | gbM  | gbM  |
| AT3G57890 | UM   | UM   | UM   | UM   | UM  | UM  | gbM  | UM   |
| AT3G57900 | UM   | UM   | UM   | UM   | UM  | UM  | UM   | UM   |
| AT3G57910 | UM   | UM   | UM   | UM   | UM  | UM  | UM   | UM   |
| AT3G57920 | UM   | UM   | UM   | UM   | UM  | UM  | UM   | UM   |
| AT3G57930 | UM   | UM   | mCHH | UM   | UM  | UM  | mCHH | UM   |
| AT3G57940 | gbM  | gbM  | gbM  | gbM  | gbM | gbM | mCHH | gbM  |
| AT3G57950 | UM   | UM   | UM   | UM   | UM  | UM  | UM   | UM   |
| AT3G57958 | UM   | UM   | UM   | UM   | UM  | UM  | UM   | UM   |
| AT3G57960 | UM   | UM   | UM   | UM   | UM  | UM  | UM   | UM   |
| AT3G57970 | UM   | UM   | UM   | UM   | UM  | UM  | UM   | UM   |
| AT3G57980 | UM   | UM   | UM   | UM   | UM  | UM  | mCHG | UM   |
| AT3G57990 | UM   | UM   | UM   | UM   | UM  | UM  | UM   | UM   |
| AT3G58000 | UM   | UM   | UM   | UM   | UM  | UM  | UM   | UM   |
| AT3G58010 | UM   | UM   | UM   | UM   | UM  | UM  | UM   | UM   |
| AT3G58020 | UM   | UM   | UM   | UM   | UM  | UM  | UM   | UM   |
| AT3G58030 | gbM  | gbM  | gbM  | gbM  | gbM | gbM | gbM  | gbM  |
| AT3G58040 | UM   | UM   | UM   | UM   | UM  | UM  | mCHH | UM   |
| AT3G58050 | gbM  | mCHH | gbM  | gbM  | gbM | gbM | gbM  | gbM  |
| AT3G58060 | UM   | UM   | UM   | UM   | UM  | UM  | UM   | UM   |
| AT3G58070 | UM   | UM   | UM   | UM   | UM  | UM  | UM   | UM   |
| AT3G58080 | UM   | UM   | UM   | UM   | UM  | UM  | UM   | UM   |
| AT3G58090 | UM   | UM   | UM   | UM   | UM  | UM  | UM   | UM   |
| AT3G58100 | UM   | UM   | UM   | UM   | UM  | UM  | UM   | UM   |
| AT3G58110 | UM   | UM   | UM   | UM   | UM  | UM  | mCHH | UM   |
| AT3G58120 | UM   | UM   | UM   | UM   | UM  | UM  | UM   | UM   |

|           |      |      |     |     |     |     |      |     |
|-----------|------|------|-----|-----|-----|-----|------|-----|
| AT3G58130 | UM   | gbM  | gbM | UM  | UM  | UM  | gbM  | gbM |
| AT3G58140 | UM   | UM   | UM  | UM  | UM  | UM  | UM   | UM  |
| AT3G58150 | UM   | UM   | UM  | UM  | UM  | UM  | UM   | UM  |
| AT3G58160 | mCHH | gbM  | UM  | UM  | UM  | gbM | mCHH | UM  |
| AT3G58170 | UM   | UM   | UM  | UM  | UM  | UM  | UM   | UM  |
| AT3G58180 | UM   | UM   | UM  | UM  | UM  | UM  | UM   | UM  |
| AT3G58190 | UM   | UM   | UM  | UM  | UM  | UM  | UM   | UM  |
| AT3G58200 | UM   | UM   | UM  | UM  | UM  | UM  | UM   | UM  |
| AT3G58210 | UM   | UM   | UM  | UM  | UM  | UM  | UM   | UM  |
| AT3G58220 | UM   | UM   | UM  | UM  | UM  | UM  | UM   | UM  |
| AT3G58230 | UM   | UM   | UM  | UM  | UM  | UM  | UM   | UM  |
| AT3G58240 | UM   | UM   | UM  | UM  | UM  | UM  | UM   | UM  |
| AT3G58250 | UM   | UM   | UM  | UM  | UM  | UM  | UM   | UM  |
| AT3G58260 | UM   | UM   | UM  | UM  | UM  | UM  | UM   | UM  |
| AT3G58270 | UM   | UM   | UM  | UM  | UM  | UM  | UM   | UM  |
| AT3G58280 | UM   | UM   | UM  | UM  | UM  | UM  | UM   | UM  |
| AT3G58290 | UM   | UM   | UM  | UM  | UM  | UM  | UM   | UM  |
| AT3G58300 | UM   | UM   | UM  | UM  | UM  | UM  | UM   | UM  |
| AT3G58310 | UM   | UM   | UM  | UM  | UM  | UM  | UM   | UM  |
| AT3G58320 | UM   | UM   | UM  | UM  | UM  | UM  | UM   | UM  |
| AT3G58330 | UM   | UM   | UM  | UM  | UM  | UM  | UM   | UM  |
| AT3G58340 | UM   | UM   | UM  | UM  | UM  | UM  | UM   | UM  |
| AT3G58350 | UM   | UM   | UM  | UM  | UM  | UM  | UM   | UM  |
| AT3G58360 | UM   | UM   | UM  | UM  | UM  | UM  | UM   | UM  |
| AT3G58370 | UM   | UM   | UM  | UM  | UM  | UM  | UM   | UM  |
| AT3G58380 | UM   | UM   | UM  | UM  | UM  | UM  | UM   | UM  |
| AT3G58390 | UM   | mCHH | UM  | UM  | UM  | UM  | UM   | UM  |
| AT3G58400 | UM   | UM   | UM  | UM  | UM  | UM  | UM   | UM  |
| AT3G58410 | UM   | UM   | UM  | UM  | UM  | UM  | UM   | UM  |
| AT3G58420 | UM   | UM   | UM  | UM  | UM  | UM  | UM   | UM  |
| AT3G58430 | UM   | UM   | UM  | UM  | UM  | UM  | UM   | UM  |
| AT3G58440 | UM   | UM   | UM  | UM  | UM  | UM  | UM   | UM  |
| AT3G58450 | UM   | UM   | UM  | UM  | UM  | UM  | UM   | UM  |
| AT3G58460 | UM   | UM   | UM  | UM  | UM  | UM  | UM   | UM  |
| AT3G58470 | UM   | UM   | UM  | UM  | UM  | UM  | UM   | UM  |
| AT3G58480 | UM   | UM   | UM  | UM  | UM  | UM  | UM   | UM  |
| AT3G58490 | UM   | UM   | UM  | UM  | UM  | UM  | UM   | UM  |
| AT3G58500 | gbM  | gbM  | gbM | gbM | UM  | UM  | gbM  | UM  |
| AT3G58510 | gbM  | gbM  | gbM | gbM | gbM | gbM | gbM  | gbM |
| AT3G58520 | UM   | UM   | UM  | UM  | UM  | UM  | UM   | UM  |
| AT3G58530 | UM   | UM   | UM  | UM  | UM  | UM  | UM   | UM  |
| AT3G58540 | UM   | UM   | UM  | UM  | UM  | UM  | UM   | UM  |
| AT3G58550 | UM   | UM   | UM  | UM  | UM  | UM  | UM   | UM  |
| AT3G58560 | UM   | mCHH | UM  | UM  | UM  | UM  | gbM  | UM  |
| AT3G58570 | gbM  | gbM  | gbM | gbM | gbM | gbM | gbM  | gbM |
| AT3G58580 | UM   | UM   | UM  | UM  | UM  | UM  | UM   | UM  |
| AT3G58590 | UM   | gbM  | UM  | gbM | UM  | UM  | gbM  | UM  |
| AT3G58600 | UM   | UM   | UM  | UM  | UM  | UM  | UM   | UM  |

|           |     |     |      |     |     |     |      |     |
|-----------|-----|-----|------|-----|-----|-----|------|-----|
| AT3G58610 | UM  | UM  | UM   | UM  | UM  | UM  | UM   | UM  |
| AT3G58620 | UM  | UM  | UM   | UM  | UM  | UM  | UM   | UM  |
| AT3G58630 | UM  | UM  | UM   | UM  | UM  | UM  | UM   | UM  |
| AT3G58640 | gbM | gbM | gbM  | gbM | gbM | gbM | gbM  | gbM |
| AT3G58650 | UM  | UM  | UM   | UM  | UM  | UM  | mCHH | UM  |
| AT3G58660 | UM  | UM  | UM   | UM  | UM  | UM  | UM   | UM  |
| AT3G58670 | UM  | UM  | UM   | UM  | UM  | UM  | UM   | UM  |
| AT3G58676 | UM  | UM  | UM   | UM  | UM  | UM  | UM   | UM  |
| AT3G58680 | UM  | UM  | UM   | UM  | UM  | UM  | UM   | UM  |
| AT3G58690 | UM  | UM  | UM   | UM  | UM  | UM  | UM   | UM  |
| AT3G58700 | UM  | UM  | UM   | UM  | UM  | UM  | UM   | UM  |
| AT3G58710 | UM  | UM  | UM   | UM  | UM  | UM  | UM   | UM  |
| AT3G58720 | UM  | UM  | UM   | UM  | UM  | UM  | UM   | UM  |
| AT3G58730 | gbM | gbM | gbM  | UM  | UM  | gbM | UM   | UM  |
| AT3G58740 | UM  | UM  | UM   | UM  | UM  | UM  | UM   | UM  |
| AT3G58750 | UM  | UM  | UM   | UM  | UM  | UM  | UM   | UM  |
| AT3G58760 | UM  | UM  | UM   | UM  | UM  | UM  | UM   | UM  |
| AT3G58770 | UM  | UM  | UM   | UM  | UM  | UM  | UM   | UM  |
| AT3G58780 | UM  | UM  | UM   | UM  | UM  | UM  | UM   | UM  |
| AT3G58790 | UM  | UM  | UM   | UM  | UM  | UM  | UM   | UM  |
| AT3G58800 | UM  | UM  | UM   | UM  | UM  | UM  | UM   | UM  |
| AT3G58810 | UM  | UM  | UM   | UM  | UM  | UM  | UM   | UM  |
| AT3G58820 | UM  | UM  | UM   | UM  | UM  | UM  | UM   | UM  |
| AT3G58830 | UM  | UM  | UM   | UM  | UM  | UM  | mCHH | UM  |
| AT3G58840 | UM  | UM  | mCHG | UM  | UM  | UM  | UM   | UM  |
| AT3G58850 | UM  | UM  | UM   | UM  | UM  | UM  | UM   | UM  |
| AT3G58860 | UM  | UM  | UM   | UM  | UM  | UM  | UM   | UM  |
| AT3G58877 | UM  | UM  | UM   | UM  | UM  | UM  | UM   | UM  |
| AT3G58880 | UM  | UM  | UM   | UM  | UM  | UM  | UM   | UM  |
| AT3G58890 | UM  | UM  | UM   | UM  | UM  | UM  | UM   | UM  |
| AT3G58900 | UM  | UM  | UM   | UM  | UM  | UM  | UM   | UM  |
| AT3G58910 | UM  | UM  | UM   | UM  | UM  | UM  | UM   | UM  |
| AT3G58920 | UM  | UM  | UM   | UM  | UM  | UM  | UM   | UM  |
| AT3G58930 | UM  | UM  | UM   | UM  | UM  | UM  | UM   | UM  |
| AT3G58940 | UM  | UM  | UM   | UM  | UM  | UM  | UM   | UM  |
| AT3G58950 | UM  | UM  | UM   | UM  | UM  | UM  | UM   | UM  |
| AT3G58960 | UM  | UM  | UM   | UM  | UM  | UM  | mCHH | UM  |
| AT3G58970 | UM  | UM  | UM   | UM  | UM  | UM  | UM   | UM  |
| AT3G58980 | UM  | UM  | UM   | UM  | UM  | UM  | UM   | UM  |
| AT3G58990 | UM  | UM  | UM   | UM  | UM  | UM  | UM   | UM  |
| AT3G59000 | UM  | UM  | UM   | UM  | UM  | UM  | UM   | UM  |
| AT3G59010 | UM  | UM  | UM   | UM  | UM  | UM  | UM   | UM  |
| AT3G59020 | gbM | gbM | gbM  | gbM | gbM | gbM | mCHH | gbM |
| AT3G59030 | UM  | UM  | UM   | UM  | UM  | UM  | UM   | UM  |
| AT3G59040 | gbM | gbM | UM   | UM  | UM  | UM  | gbM  | UM  |
| AT3G59050 | UM  | UM  | UM   | UM  | UM  | UM  | UM   | UM  |
| AT3G59052 | UM  | UM  | UM   | UM  | UM  | UM  | UM   | UM  |
| AT3G59060 | UM  | UM  | UM   | UM  | UM  | UM  | UM   | UM  |



|           |      |      |     |     |     |     |      |     |
|-----------|------|------|-----|-----|-----|-----|------|-----|
| AT3G59070 | UM   | UM   | UM  | UM  | UM  | UM  | UM   | UM  |
| AT3G59080 | UM   | UM   | UM  | UM  | UM  | UM  | UM   | UM  |
| AT3G59090 | UM   | mCHH | UM  | UM  | UM  | gbM | gbM  | UM  |
| AT3G59100 | UM   | mCHH | UM  | UM  | UM  | UM  | mCHH | UM  |
| AT3G59110 | UM   | UM   | UM  | UM  | UM  | UM  | gbM  | UM  |
| AT3G59120 | UM   | UM   | UM  | UM  | UM  | UM  | mCHH | UM  |
| AT3G59130 | UM   | UM   | UM  | UM  | UM  | UM  | UM   | UM  |
| AT3G59140 | UM   | UM   | UM  | UM  | UM  | UM  | mCHH | UM  |
| AT3G59150 | UM   | UM   | UM  | UM  | UM  | UM  | UM   | UM  |
| AT3G59160 | UM   | mCHG | UM  | UM  | UM  | UM  | mCHH | UM  |
| AT3G59170 | UM   | UM   | UM  | UM  | UM  | UM  | UM   | UM  |
| AT3G59180 | UM   | UM   | UM  | UM  | UM  | UM  | UM   | UM  |
| AT3G59190 | UM   | UM   | UM  | UM  | UM  | UM  | UM   | UM  |
| AT3G59200 | UM   | UM   | UM  | UM  | UM  | UM  | UM   | UM  |
| AT3G59210 | UM   | UM   | UM  | UM  | UM  | UM  | UM   | UM  |
| AT3G59220 | UM   | UM   | UM  | UM  | UM  | UM  | gbM  | UM  |
| AT3G59230 | UM   | UM   | UM  | UM  | UM  | UM  | UM   | UM  |
| AT3G59240 | UM   | UM   | UM  | UM  | UM  | UM  | UM   | UM  |
| AT3G59250 | UM   | UM   | UM  | UM  | UM  | UM  | mCHG | UM  |
| AT3G59260 | UM   | UM   | UM  | UM  | UM  | UM  | UM   | UM  |
| AT3G59270 | UM   | UM   | UM  | UM  | UM  | UM  | UM   | UM  |
| AT3G59280 | UM   | UM   | UM  | UM  | UM  | UM  | UM   | UM  |
| AT3G59290 | gbM  | gbM  | gbM | gbM | gbM | gbM | mCHH | gbM |
| AT3G59300 | UM   | UM   | UM  | UM  | UM  | UM  | UM   | UM  |
| AT3G59310 | UM   | UM   | UM  | UM  | UM  | UM  | UM   | UM  |
| AT3G59320 | UM   | UM   | UM  | UM  | UM  | UM  | UM   | UM  |
| AT3G59330 | UM   | UM   | UM  | UM  | UM  | UM  | UM   | UM  |
| AT3G59340 | UM   | UM   | UM  | UM  | UM  | UM  | UM   | UM  |
| AT3G59350 | gbM  | gbM  | gbM | gbM | gbM | gbM | gbM  | gbM |
| AT3G59360 | mCHH | gbM  | gbM | gbM | gbM | gbM | mCHH | gbM |
| AT3G59370 | UM   | UM   | UM  | UM  | UM  | UM  | UM   | UM  |
| AT3G59380 | UM   | UM   | UM  | UM  | UM  | UM  | UM   | UM  |
| AT3G59390 | UM   | UM   | UM  | UM  | UM  | UM  | UM   | UM  |
| AT3G59400 | UM   | UM   | UM  | UM  | UM  | UM  | UM   | UM  |
| AT3G59410 | gbM  | gbM  | gbM | gbM | gbM | gbM | mCHH | gbM |
| AT3G59420 | gbM  | gbM  | gbM | gbM | gbM | gbM | gbM  | gbM |
| AT3G59430 | gbM  | gbM  | gbM | gbM | gbM | gbM | gbM  | gbM |
| AT3G59440 | UM   | UM   | UM  | UM  | UM  | UM  | UM   | UM  |
| AT3G59450 | UM   | UM   | UM  | UM  | UM  | UM  | UM   | UM  |
| AT3G59455 | UM   | UM   | UM  | UM  | UM  | UM  | UM   | UM  |
| AT3G59460 | UM   | UM   | UM  | UM  | UM  | UM  | UM   | UM  |
| AT3G59470 | gbM  | gbM  | gbM | UM  | UM  | UM  | gbM  | UM  |
| AT3G59480 | UM   | UM   | UM  | UM  | UM  | UM  | UM   | UM  |
| AT3G59490 | UM   | UM   | UM  | UM  | UM  | UM  | UM   | UM  |
| AT3G59500 | UM   | UM   | UM  | UM  | UM  | UM  | UM   | UM  |
| AT3G59510 | UM   | UM   | UM  | UM  | UM  | UM  | gbM  | UM  |
| AT3G59520 | UM   | UM   | UM  | UM  | UM  | UM  | UM   | UM  |
| AT3G59530 | UM   | UM   | UM  | UM  | UM  | UM  | UM   | UM  |



|           |      |      |      |      |      |      |      |      |
|-----------|------|------|------|------|------|------|------|------|
| AT3G60040 | UM   |
| AT3G60050 | gbM  | UM   |
| AT3G60060 | UM   |
| AT3G60070 | gbM  | mCHH | gbM  | gbM  | UM   | UM   | gbM  | UM   |
| AT3G60080 | UM   |
| AT3G60090 | UM   |
| AT3G60100 | UM   |
| AT3G60110 | UM   |
| AT3G60120 | UM   |
| AT3G60130 | UM   |
| AT3G60140 | mCHH | mCHH | mCHH | mCHG | mCHG | mCHG | mCHH | mCHG |
| AT3G60150 | UM   |
| AT3G60160 | UM   | UM   | UM   | UM   | UM   | UM   | mCHH | UM   |
| AT3G60180 | UM   |
| AT3G60190 | UM   | gbM  | gbM  | gbM  | UM   | gbM  | gbM  | gbM  |
| AT3G60200 | UM   |
| AT3G60210 | UM   |
| AT3G60220 | UM   |
| AT3G60240 | gbM  | mCHH | gbM  | gbM  | gbM  | gbM  | mCHH | gbM  |
| AT3G60245 | UM   |
| AT3G60250 | UM   |
| AT3G60260 | UM   |
| AT3G60270 | UM   |
| AT3G60280 | UM   |
| AT3G60286 | UM   |
| AT3G60290 | UM   |
| AT3G60300 | UM   |
| AT3G60310 | UM   | gbM  | UM   | UM   | UM   | UM   | UM   | UM   |
| AT3G60318 | UM   |
| AT3G60320 | UM   | UM   | UM   | UM   | UM   | UM   | gbM  | UM   |
| AT3G60328 | UM   |
| AT3G60330 | UM   |
| AT3G60340 | UM   |
| AT3G60350 | gbM  |
| AT3G60360 | UM   |
| AT3G60370 | UM   |
| AT3G60380 | UM   |
| AT3G60390 | UM   |
| AT3G60400 | UM   |
| AT3G60410 | UM   |
| AT3G60420 | UM   |
| AT3G60440 | UM   |
| AT3G60450 | UM   |
| AT3G60460 | UM   |
| AT3G60470 | UM   |
| AT3G60480 | UM   |
| AT3G60490 | UM   |
| AT3G60500 | UM   |



|           |      |      |      |      |      |      |      |      |
|-----------|------|------|------|------|------|------|------|------|
| AT3G60970 | UM   |
| AT3G60980 | UM   |
| AT3G60990 | mCHH | mCHG | mCHG | mCHG | mCHG | mCHG | mCHH | UM   |
| AT3G61010 | gbM  | gbM  | gbM  | gbM  | UM   | gbM  | gbM  | UM   |
| AT3G61028 | UM   |
| AT3G61030 | mCHH | mCHG |
| AT3G61035 | UM   |
| AT3G61040 | UM   |
| AT3G61050 | mCHH | mCHH | mCHG | UM   | UM   | UM   | mCHH | UM   |
| AT3G61060 | UM   |
| AT3G61070 | UM   | UM   | UM   | UM   | UM   | UM   | mCHH | UM   |
| AT3G61080 | UM   | UM   | UM   | UM   | UM   | UM   | gbM  | UM   |
| AT3G61090 | UM   |
| AT3G61100 | UM   |
| AT3G61110 | UM   |
| AT3G61111 | UM   |
| AT3G61113 | UM   |
| AT3G61117 | UM   |
| AT3G61120 | UM   |
| AT3G61130 | gbM  | gbM  | gbM  | gbM  | UM   | UM   | gbM  | gbM  |
| AT3G61140 | UM   |
| AT3G61150 | UM   |
| AT3G61160 | UM   |
| AT3G61170 | UM   | gbM  | UM   | UM   | UM   | UM   | UM   | UM   |
| AT3G61172 | UM   |
| AT3G61175 | UM   |
| AT3G61177 | UM   |
| AT3G61180 | UM   |
| AT3G61182 | UM   |
| AT3G61190 | UM   |
| AT3G61200 | UM   |
| AT3G61210 | UM   |
| AT3G61220 | UM   |
| AT3G61230 | UM   |
| AT3G61240 | UM   |
| AT3G61250 | UM   |
| AT3G61260 | UM   |
| AT3G61270 | UM   |
| AT3G61280 | UM   |
| AT3G61290 | UM   |
| AT3G61300 | UM   |
| AT3G61310 | UM   |
| AT3G61320 | UM   | UM   | UM   | UM   | UM   | UM   | mCHH | UM   |
| AT3G61340 | UM   |
| AT3G61350 | UM   |
| AT3G61360 | UM   |
| AT3G61370 | gbM  | gbM  | gbM  | UM   | UM   | gbM  | mCHH | gbM  |
| AT3G61380 | UM   |

|           |      |      |      |      |      |      |      |      |
|-----------|------|------|------|------|------|------|------|------|
| AT3G61389 | UM   |
| AT3G61390 | UM   |
| AT3G61400 | UM   |
| AT3G61410 | UM   |
| AT3G61415 | gbM  |
| AT3G61420 | UM   | gbM  | UM   | UM   | UM   | UM   | gbM  | UM   |
| AT3G61430 | UM   |
| AT3G61440 | UM   |
| AT3G61450 | UM   |
| AT3G61460 | UM   |
| AT3G61470 | mCHG | mCHG | mCHG | mCHG | mCHG | mCHG | mCHH | mCHG |
| AT3G61480 | gbM  |
| AT3G61490 | UM   |
| AT3G61500 | UM   |
| AT3G61510 | UM   |
| AT3G61520 | UM   |
| AT3G61530 | UM   |
| AT3G61540 | UM   |
| AT3G61550 | UM   |
| AT3G61560 | UM   |
| AT3G61570 | gbM  | gbM  | gbM  | gbM  | gbM  | UM   | mCHH | UM   |
| AT3G61571 | UM   |
| AT3G61580 | UM   |
| AT3G61590 | UM   |
| AT3G61600 | UM   |
| AT3G61610 | UM   |
| AT3G61620 | UM   |
| AT3G61630 | UM   |
| AT3G61640 | UM   |
| AT3G61650 | UM   |
| AT3G61660 | UM   |
| AT3G61670 | gbM  | mCHH | gbM  | gbM  | gbM  | gbM  | gbM  | gbM  |
| AT3G61678 | UM   |
| AT3G61680 | UM   |
| AT3G61690 | gbM  |
| AT3G61700 | UM   |
| AT3G61710 | UM   |
| AT3G61720 | UM   |
| AT3G61723 | UM   |
| AT3G61730 | UM   |
| AT3G61740 | UM   |
| AT3G61750 | UM   |
| AT3G61760 | UM   |
| AT3G61763 | UM   |
| AT3G61770 | UM   |
| AT3G61780 | gbM  | mCHH | gbM  | UM   | UM   | UM   | mCHH | UM   |
| AT3G61790 | UM   |
| AT3G61800 | UM   |

|           |     |      |     |     |     |     |      |     |
|-----------|-----|------|-----|-----|-----|-----|------|-----|
| AT3G61810 | UM  | UM   | UM  | UM  | UM  | UM  | UM   | UM  |
| AT3G61820 | UM  | UM   | UM  | UM  | UM  | UM  | UM   | UM  |
| AT3G61826 | UM  | UM   | UM  | UM  | UM  | UM  | UM   | UM  |
| AT3G61827 | UM  | UM   | UM  | UM  | UM  | UM  | UM   | UM  |
| AT3G61829 | UM  | UM   | UM  | UM  | UM  | UM  | UM   | UM  |
| AT3G61830 | UM  | UM   | UM  | UM  | UM  | UM  | mCHH | UM  |
| AT3G61840 | UM  | UM   | UM  | UM  | UM  | UM  | UM   | UM  |
| AT3G61850 | UM  | UM   | UM  | UM  | UM  | UM  | UM   | UM  |
| AT3G61860 | gbM | gbM  | gbM | gbM | UM  | gbM | gbM  | gbM |
| AT3G61870 | UM  | UM   | UM  | UM  | UM  | UM  | UM   | UM  |
| AT3G61880 | UM  | UM   | UM  | UM  | UM  | UM  | UM   | UM  |
| AT3G61890 | UM  | UM   | UM  | UM  | UM  | UM  | UM   | UM  |
| AT3G61898 | UM  | UM   | UM  | UM  | UM  | UM  | UM   | UM  |
| AT3G61900 | UM  | UM   | UM  | UM  | UM  | UM  | UM   | UM  |
| AT3G61910 | UM  | UM   | UM  | UM  | UM  | UM  | UM   | UM  |
| AT3G61920 | UM  | UM   | UM  | UM  | UM  | UM  | UM   | UM  |
| AT3G61930 | UM  | UM   | UM  | UM  | UM  | UM  | UM   | UM  |
| AT3G61940 | UM  | UM   | UM  | UM  | UM  | UM  | UM   | UM  |
| AT3G61947 | UM  | UM   | UM  | UM  | UM  | UM  | UM   | UM  |
| AT3G61950 | UM  | mCHH | UM  | UM  | UM  | UM  | mCHH | UM  |
| AT3G61960 | gbM | gbM  | UM  | UM  | UM  | UM  | gbM  | UM  |
| AT3G61962 | UM  | UM   | UM  | UM  | UM  | UM  | UM   | UM  |
| AT3G61970 | UM  | UM   | UM  | UM  | UM  | UM  | UM   | UM  |
| AT3G61980 | UM  | UM   | UM  | UM  | UM  | UM  | UM   | UM  |
| AT3G61990 | UM  | UM   | UM  | UM  | UM  | UM  | UM   | UM  |
| AT3G62000 | UM  | UM   | UM  | UM  | UM  | UM  | UM   | UM  |
| AT3G62010 | gbM | gbM  | gbM | gbM | gbM | gbM | gbM  | gbM |
| AT3G62020 | UM  | UM   | UM  | UM  | UM  | UM  | UM   | UM  |
| AT3G62030 | UM  | UM   | UM  | UM  | UM  | UM  | UM   | UM  |
| AT3G62040 | UM  | UM   | UM  | UM  | UM  | UM  | UM   | UM  |
| AT3G62050 | UM  | UM   | UM  | UM  | UM  | UM  | UM   | UM  |
| AT3G62060 | UM  | UM   | UM  | UM  | UM  | UM  | UM   | UM  |
| AT3G62070 | UM  | UM   | UM  | UM  | UM  | UM  | UM   | UM  |
| AT3G62080 | UM  | UM   | UM  | UM  | UM  | UM  | UM   | UM  |
| AT3G62090 | UM  | UM   | UM  | UM  | UM  | UM  | UM   | UM  |
| AT3G62097 | UM  | UM   | UM  | UM  | UM  | UM  | UM   | UM  |
| AT3G62100 | UM  | UM   | UM  | UM  | UM  | UM  | UM   | UM  |
| AT3G62110 | gbM | gbM  | gbM | gbM | gbM | gbM | gbM  | gbM |
| AT3G62120 | UM  | UM   | UM  | UM  | UM  | UM  | UM   | UM  |
| AT3G62130 | UM  | UM   | UM  | UM  | UM  | UM  | UM   | UM  |
| AT3G62140 | UM  | UM   | UM  | UM  | UM  | UM  | UM   | UM  |
| AT3G62150 | UM  | UM   | UM  | UM  | UM  | UM  | mCHH | UM  |
| AT3G62160 | UM  | UM   | UM  | UM  | UM  | UM  | UM   | UM  |
| AT3G62170 | UM  | UM   | UM  | UM  | UM  | UM  | UM   | UM  |
| AT3G62180 | UM  | UM   | UM  | UM  | UM  | UM  | UM   | UM  |
| AT3G62190 | UM  | UM   | UM  | UM  | UM  | UM  | UM   | UM  |
| AT3G62200 | UM  | UM   | UM  | UM  | UM  | UM  | UM   | UM  |
| AT3G62210 | UM  | UM   | UM  | UM  | UM  | UM  | UM   | UM  |

|           |     |      |     |     |     |     |      |     |
|-----------|-----|------|-----|-----|-----|-----|------|-----|
| AT3G62220 | UM  | UM   | UM  | UM  | UM  | UM  | UM   | UM  |
| AT3G62230 | UM  | UM   | UM  | UM  | UM  | UM  | UM   | UM  |
| AT3G62240 | UM  | UM   | UM  | UM  | UM  | UM  | UM   | UM  |
| AT3G62250 | UM  | UM   | UM  | UM  | UM  | UM  | UM   | UM  |
| AT3G62260 | UM  | UM   | UM  | UM  | UM  | UM  | UM   | UM  |
| AT3G62270 | UM  | UM   | UM  | UM  | UM  | UM  | UM   | UM  |
| AT3G62280 | UM  | UM   | UM  | UM  | UM  | UM  | UM   | UM  |
| AT3G62290 | gbM | gbM  | gbM | gbM | gbM | gbM | gbM  | UM  |
| AT3G62300 | UM  | mCHH | UM  | UM  | UM  | UM  | mCHH | UM  |
| AT3G62310 | UM  | UM   | UM  | UM  | UM  | UM  | mCHH | UM  |
| AT3G62320 | UM  | UM   | UM  | UM  | UM  | UM  | UM   | UM  |
| AT3G62330 | gbM | gbM  | gbM | gbM | gbM | gbM | gbM  | gbM |
| AT3G62336 | UM  | UM   | UM  | UM  | UM  | UM  | UM   | UM  |
| AT3G62340 | UM  | UM   | UM  | UM  | UM  | UM  | UM   | UM  |
| AT3G62350 | UM  | UM   | UM  | UM  | UM  | UM  | UM   | UM  |
| AT3G62360 | gbM | mCHH | gbM | gbM | UM  | gbM | gbM  | gbM |
| AT3G62370 | UM  | UM   | UM  | UM  | UM  | UM  | UM   | UM  |
| AT3G62380 | UM  | UM   | UM  | UM  | UM  | UM  | UM   | UM  |
| AT3G62390 | UM  | UM   | UM  | UM  | UM  | UM  | mCHH | UM  |
| AT3G62400 | UM  | UM   | UM  | UM  | UM  | UM  | UM   | UM  |
| AT3G62410 | UM  | UM   | UM  | UM  | UM  | UM  | UM   | UM  |
| AT3G62420 | UM  | UM   | UM  | UM  | UM  | UM  | UM   | UM  |
| AT3G62422 | UM  | UM   | UM  | UM  | UM  | UM  | UM   | UM  |
| AT3G62430 | UM  | UM   | UM  | UM  | UM  | UM  | mCHH | UM  |
| AT3G62440 | UM  | UM   | UM  | UM  | UM  | UM  | UM   | UM  |
| AT3G62450 | UM  | UM   | UM  | UM  | UM  | UM  | UM   | UM  |
| AT3G62460 | UM  | UM   | UM  | UM  | UM  | UM  | UM   | UM  |
| AT3G62470 | gbM | gbM  | gbM | gbM | gbM | UM  | gbM  | gbM |
| AT3G62499 | UM  | UM   | UM  | UM  | UM  | UM  | UM   | UM  |
| AT3G62500 | UM  | UM   | UM  | UM  | UM  | UM  | UM   | UM  |
| AT3G62510 | UM  | UM   | UM  | UM  | UM  | UM  | UM   | UM  |
| AT3G62528 | UM  | UM   | UM  | UM  | UM  | UM  | UM   | UM  |
| AT3G62530 | UM  | UM   | UM  | UM  | UM  | UM  | UM   | UM  |
| AT3G62540 | UM  | UM   | UM  | UM  | UM  | UM  | UM   | UM  |
| AT3G62550 | UM  | UM   | UM  | UM  | UM  | UM  | UM   | UM  |
| AT3G62560 | UM  | UM   | UM  | UM  | UM  | UM  | UM   | UM  |
| AT3G62570 | UM  | UM   | UM  | UM  | UM  | UM  | UM   | UM  |
| AT3G62580 | UM  | UM   | UM  | UM  | UM  | UM  | UM   | UM  |
| AT3G62590 | UM  | UM   | UM  | UM  | UM  | UM  | UM   | UM  |
| AT3G62600 | UM  | UM   | UM  | UM  | UM  | UM  | UM   | UM  |
| AT3G62610 | UM  | UM   | UM  | UM  | UM  | UM  | UM   | UM  |
| AT3G62620 | UM  | UM   | UM  | UM  | UM  | UM  | UM   | UM  |
| AT3G62630 | UM  | UM   | UM  | UM  | UM  | UM  | UM   | UM  |
| AT3G62640 | UM  | UM   | UM  | UM  | UM  | UM  | UM   | UM  |
| AT3G62650 | UM  | UM   | UM  | UM  | UM  | UM  | UM   | UM  |
| AT3G62660 | UM  | UM   | UM  | UM  | UM  | UM  | UM   | UM  |
| AT3G62670 | UM  | UM   | UM  | UM  | UM  | UM  | UM   | UM  |
| AT3G62680 | UM  | UM   | UM  | UM  | UM  | UM  | UM   | UM  |



|           |     |      |      |     |     |     |      |     |
|-----------|-----|------|------|-----|-----|-----|------|-----|
| AT3G62690 | UM  | UM   | UM   | UM  | UM  | UM  | UM   | UM  |
| AT3G62700 | UM  | UM   | UM   | UM  | UM  | UM  | UM   | UM  |
| AT3G62710 | UM  | UM   | UM   | UM  | UM  | UM  | UM   | UM  |
| AT3G62720 | UM  | UM   | UM   | UM  | UM  | UM  | UM   | UM  |
| AT3G62730 | UM  | UM   | UM   | UM  | UM  | UM  | UM   | UM  |
| AT3G62740 | UM  | UM   | UM   | UM  | UM  | UM  | UM   | UM  |
| AT3G62750 | UM  | UM   | UM   | UM  | UM  | UM  | UM   | UM  |
| AT3G62760 | UM  | UM   | UM   | UM  | UM  | UM  | UM   | UM  |
| AT3G62770 | UM  | UM   | UM   | UM  | UM  | UM  | UM   | UM  |
| AT3G62780 | UM  | UM   | UM   | UM  | UM  | UM  | UM   | UM  |
| AT3G62790 | UM  | UM   | UM   | UM  | UM  | UM  | UM   | UM  |
| AT3G62800 | UM  | UM   | UM   | UM  | UM  | UM  | UM   | UM  |
| AT3G62810 | UM  | UM   | UM   | UM  | UM  | UM  | UM   | UM  |
| AT3G62820 | UM  | UM   | UM   | UM  | UM  | UM  | UM   | UM  |
| AT3G62830 | UM  | UM   | UM   | UM  | UM  | UM  | UM   | UM  |
| AT3G62840 | UM  | UM   | UM   | UM  | UM  | UM  | UM   | UM  |
| AT3G62850 | UM  | UM   | UM   | UM  | UM  | UM  | UM   | UM  |
| AT3G62860 | UM  | UM   | UM   | UM  | UM  | UM  | UM   | UM  |
| AT3G62870 | UM  | UM   | UM   | UM  | UM  | UM  | UM   | UM  |
| AT3G62880 | UM  | UM   | UM   | UM  | UM  | UM  | UM   | UM  |
| AT3G62890 | UM  | UM   | UM   | UM  | UM  | UM  | mCHH | UM  |
| AT3G62900 | gbM | mCHH | mCHH | gbM | gbM | gbM | mCHH | gbM |
| AT3G62907 | UM  | UM   | UM   | UM  | UM  | UM  | UM   | UM  |
| AT3G62910 | UM  | UM   | UM   | UM  | UM  | UM  | UM   | UM  |
| AT3G62920 | UM  | UM   | UM   | UM  | UM  | UM  | UM   | UM  |
| AT3G62930 | UM  | UM   | UM   | UM  | UM  | UM  | UM   | UM  |
| AT3G62940 | gbM | gbM  | gbM  | gbM | gbM | gbM | gbM  | gbM |
| AT3G62950 | UM  | UM   | UM   | UM  | UM  | UM  | UM   | UM  |
| AT3G62960 | UM  | UM   | UM   | UM  | UM  | UM  | UM   | UM  |
| AT3G62970 | UM  | UM   | UM   | UM  | UM  | UM  | UM   | UM  |
| AT3G62980 | gbM | UM   | UM   | UM  | UM  | UM  | UM   | UM  |
| AT3G62988 | UM  | UM   | UM   | UM  | UM  | UM  | UM   | UM  |
| AT3G62990 | UM  | UM   | UM   | UM  | UM  | UM  | UM   | UM  |
| AT3G63000 | UM  | UM   | UM   | UM  | UM  | UM  | UM   | UM  |
| AT3G63010 | UM  | UM   | UM   | UM  | UM  | UM  | UM   | UM  |
| AT3G63020 | UM  | UM   | UM   | UM  | UM  | UM  | UM   | UM  |
| AT3G63030 | UM  | UM   | UM   | UM  | UM  | UM  | UM   | UM  |
| AT3G63040 | UM  | UM   | UM   | UM  | UM  | UM  | UM   | UM  |
| AT3G63050 | UM  | UM   | UM   | UM  | UM  | UM  | UM   | UM  |
| AT3G63052 | UM  | UM   | UM   | UM  | UM  | UM  | UM   | UM  |
| AT3G63060 | UM  | UM   | UM   | UM  | UM  | UM  | UM   | UM  |
| AT3G63070 | gbM | gbM  | gbM  | gbM | gbM | gbM | mCHH | gbM |
| AT3G63080 | UM  | UM   | UM   | UM  | UM  | UM  | mCHH | UM  |
| AT3G63088 | UM  | UM   | UM   | UM  | UM  | UM  | UM   | UM  |
| AT3G63090 | UM  | UM   | UM   | UM  | UM  | UM  | UM   | UM  |
| AT3G63095 | UM  | UM   | UM   | UM  | UM  | UM  | UM   | UM  |
| AT3G63110 | UM  | UM   | UM   | UM  | UM  | UM  | UM   | UM  |
| AT3G63120 | UM  | UM   | UM   | UM  | UM  | UM  | UM   | UM  |



|           |      |      |      |      |      |      |      |      |
|-----------|------|------|------|------|------|------|------|------|
| AT4G00026 | UM   |
| AT4G00030 | UM   |
| AT4G00040 | gbM  | UM   |
| AT4G00050 | UM   |
| AT4G00060 | gbM  | gbM  | gbM  | gbM  | gbM  | gbM  | mCHH | gbM  |
| AT4G00070 | mCHH | mCHH | mCHH | mCHH | mCHH | mCHG | mCHH | mCHG |
| AT4G00080 | UM   |
| AT4G00090 | UM   |
| AT4G00100 | UM   |
| AT4G00110 | UM   |
| AT4G00120 | UM   |
| AT4G00124 | UM   |
| AT4G00130 | mCHH |
| AT4G00140 | mCHH |
| AT4G00150 | UM   | UM   | UM   | UM   | UM   | UM   | mCHH | UM   |
| AT4G00160 | UM   | UM   | UM   | UM   | UM   | UM   | mCHH | UM   |
| AT4G00165 | UM   |
| AT4G00170 | UM   | UM   | UM   | UM   | UM   | UM   | mCHH | UM   |
| AT4G00180 | UM   |
| AT4G00190 | UM   | UM   | UM   | UM   | UM   | UM   | mCHH | UM   |
| AT4G00200 | gbM  | UM   |
| AT4G00210 | UM   |
| AT4G00220 | UM   |
| AT4G00230 | UM   | UM   | UM   | UM   | UM   | UM   | mCHH | UM   |
| AT4G00231 | UM   |
| AT4G00232 | UM   | UM   | UM   | UM   | UM   | UM   | mCHH | UM   |
| AT4G00234 | UM   |
| AT4G00238 | UM   | UM   | UM   | UM   | UM   | UM   | mCHH | UM   |
| AT4G00240 | UM   | UM   | UM   | UM   | UM   | UM   | mCHH | UM   |
| AT4G00250 | UM   | UM   | UM   | UM   | UM   | UM   | mCHH | UM   |
| AT4G00260 | UM   | UM   | UM   | UM   | UM   | UM   | mCHH | UM   |
| AT4G00270 | UM   | UM   | UM   | UM   | UM   | UM   | mCHH | UM   |
| AT4G00280 | UM   |
| AT4G00290 | gbM  | gbM  | gbM  | UM   | gbM  | UM   | gbM  | UM   |
| AT4G00300 | UM   | UM   | UM   | UM   | UM   | UM   | mCHH | UM   |
| AT4G00305 | UM   |
| AT4G00310 | UM   | UM   | UM   | UM   | UM   | UM   | mCHH | UM   |
| AT4G00315 | UM   |
| AT4G00320 | UM   | UM   | UM   | UM   | UM   | UM   | mCHH | UM   |
| AT4G00330 | UM   |
| AT4G00335 | UM   |
| AT4G00340 | UM   | UM   | UM   | UM   | UM   | UM   | mCHH | UM   |
| AT4G00342 | UM   |
| AT4G00350 | UM   | UM   | UM   | UM   | UM   | UM   | mCHH | UM   |
| AT4G00355 | UM   |
| AT4G00360 | UM   |
| AT4G00370 | UM   | UM   | UM   | UM   | UM   | UM   | mCHH | UM   |
| AT4G00380 | UM   | UM   | UM   | UM   | UM   | UM   | mCHH | UM   |

|           |      |      |      |      |      |      |      |      |
|-----------|------|------|------|------|------|------|------|------|
| AT4G00390 | UM   | UM   | UM   | UM   | UM   | UM   | mCHH | UM   |
| AT4G00400 | UM   | UM   | UM   | UM   | UM   | UM   | mCHH | UM   |
| AT4G00416 | mCHH | mCHH | mCHH | mCHG | mCHH | mCHG | mCHH | mCHH |
| AT4G00420 | gbM  |
| AT4G00430 | UM   |
| AT4G00440 | UM   | UM   | gbM  | UM   | UM   | UM   | mCHH | UM   |
| AT4G00450 | gbM  | mCHH | gbM  | gbM  | gbM  | gbM  | mCHH | gbM  |
| AT4G00460 | UM   |
| AT4G00467 | UM   |
| AT4G00480 | UM   | UM   | UM   | UM   | UM   | UM   | mCHH | UM   |
| AT4G00490 | UM   |
| AT4G00500 | UM   |
| AT4G00520 | UM   | UM   | UM   | UM   | UM   | UM   | mCHH | UM   |
| AT4G00525 | UM   |
| AT4G00530 | UM   |
| AT4G00540 | mCHH | mCHH | mCHH | UM   | mCHG | mCHG | mCHH | mCHG |
| AT4G00550 | UM   | UM   | UM   | gbM  | UM   | UM   | mCHH | UM   |
| AT4G00560 | UM   |
| AT4G00570 | gbM  | gbM  | gbM  | gbM  | gbM  | gbM  | mCHH | gbM  |
| AT4G00580 | mCHH |
| AT4G00585 | UM   | UM   | UM   | UM   | UM   | UM   | mCHH | UM   |
| AT4G00590 | UM   |
| AT4G00600 | UM   |
| AT4G00610 | UM   | UM   | UM   | UM   | UM   | UM   | mCHH | UM   |
| AT4G00620 | UM   | UM   | gbM  | UM   | UM   | UM   | gbM  | UM   |
| AT4G00630 | UM   | gbM  | gbM  | UM   | UM   | UM   | mCHH | UM   |
| AT4G00650 | UM   |
| AT4G00651 | UM   |
| AT4G00660 | UM   | UM   | UM   | UM   | UM   | UM   | mCHH | UM   |
| AT4G00670 | UM   |
| AT4G00680 | UM   |
| AT4G00690 | UM   | UM   | UM   | UM   | UM   | UM   | mCHG | UM   |
| AT4G00695 | UM   |
| AT4G00700 | UM   | UM   | UM   | UM   | UM   | UM   | mCHH | UM   |
| AT4G00710 | gbM  | gbM  | gbM  | gbM  | gbM  | gbM  | mCHH | gbM  |
| AT4G00720 | gbM  | gbM  | gbM  | gbM  | gbM  | gbM  | mCHH | gbM  |
| AT4G00730 | UM   | UM   | UM   | UM   | UM   | UM   | mCHH | UM   |
| AT4G00740 | UM   | UM   | UM   | UM   | UM   | UM   | mCHH | UM   |
| AT4G00750 | UM   |
| AT4G00752 | UM   | UM   | UM   | UM   | UM   | UM   | mCHH | UM   |
| AT4G00755 | UM   | mCHH | UM   | UM   | UM   | UM   | mCHH | UM   |
| AT4G00760 | UM   | UM   | UM   | UM   | UM   | UM   | mCHH | UM   |
| AT4G00770 | mCHH | UM   | UM   | UM   | UM   | UM   | mCHH | UM   |
| AT4G00780 | UM   |
| AT4G00800 | gbM  | mCHH | gbM  | gbM  | gbM  | gbM  | mCHH | gbM  |
| AT4G00810 | UM   |
| AT4G00820 | UM   | UM   | UM   | UM   | UM   | UM   | mCHH | UM   |
| AT4G00830 | UM   | gbM  | UM   | UM   | UM   | UM   | UM   | UM   |



|           |      |      |      |     |     |     |      |     |
|-----------|------|------|------|-----|-----|-----|------|-----|
| AT4G01240 | mCHH | mCHH | gbM  | gbM | UM  | UM  | mCHH | UM  |
| AT4G01245 | UM   | UM   | UM   | UM  | UM  | UM  | mCHH | UM  |
| AT4G01250 | UM   | UM   | UM   | UM  | UM  | UM  | UM   | UM  |
| AT4G01260 | UM   | UM   | mCHH | UM  | UM  | UM  | mCHH | UM  |
| AT4G01270 | UM   | UM   | UM   | UM  | UM  | UM  | mCHH | UM  |
| AT4G01280 | UM   | UM   | UM   | UM  | UM  | UM  | mCHH | UM  |
| AT4G01290 | gbM  | gbM  | gbM  | gbM | gbM | gbM | mCHH | gbM |
| AT4G01310 | UM   | UM   | UM   | UM  | UM  | UM  | UM   | UM  |
| AT4G01320 | UM   | UM   | UM   | UM  | UM  | UM  | mCHH | UM  |
| AT4G01328 | UM   | UM   | UM   | UM  | UM  | UM  | UM   | UM  |
| AT4G01330 | UM   | UM   | UM   | UM  | UM  | UM  | gbM  | UM  |
| AT4G01335 | UM   | UM   | UM   | UM  | UM  | UM  | UM   | UM  |
| AT4G01340 | UM   | UM   | UM   | UM  | UM  | UM  | UM   | UM  |
| AT4G01350 | UM   | UM   | UM   | UM  | UM  | UM  | mCHH | UM  |
| AT4G01360 | UM   | UM   | UM   | UM  | UM  | UM  | UM   | UM  |
| AT4G01370 | UM   | UM   | UM   | UM  | gbM | UM  | gbM  | UM  |
| AT4G01380 | UM   | UM   | UM   | UM  | UM  | UM  | UM   | UM  |
| AT4G01390 | UM   | UM   | UM   | UM  | UM  | UM  | UM   | UM  |
| AT4G01400 | UM   | UM   | UM   | UM  | UM  | UM  | mCHH | UM  |
| AT4G01410 | UM   | UM   | UM   | UM  | UM  | UM  | UM   | UM  |
| AT4G01420 | UM   | UM   | UM   | UM  | UM  | UM  | mCHH | UM  |
| AT4G01430 | UM   | UM   | UM   | UM  | UM  | UM  | UM   | UM  |
| AT4G01440 | UM   | UM   | UM   | UM  | UM  | UM  | mCHH | UM  |
| AT4G01450 | UM   | UM   | UM   | UM  | UM  | UM  | mCHH | UM  |
| AT4G01460 | UM   | UM   | UM   | UM  | UM  | UM  | mCHH | UM  |
| AT4G01470 | UM   | UM   | UM   | UM  | UM  | UM  | UM   | UM  |
| AT4G01480 | UM   | UM   | UM   | UM  | UM  | UM  | mCHH | UM  |
| AT4G01500 | UM   | UM   | UM   | UM  | UM  | UM  | UM   | UM  |
| AT4G01510 | UM   | UM   | UM   | UM  | UM  | UM  | mCHH | UM  |
| AT4G01516 | UM   | UM   | UM   | UM  | UM  | UM  | UM   | UM  |
| AT4G01520 | UM   | UM   | UM   | UM  | UM  | UM  | UM   | UM  |
| AT4G01535 | UM   | UM   | UM   | UM  | UM  | UM  | UM   | UM  |
| AT4G01540 | UM   | UM   | UM   | UM  | UM  | UM  | UM   | UM  |
| AT4G01550 | UM   | UM   | UM   | UM  | UM  | UM  | mCHH | UM  |
| AT4G01560 | UM   | UM   | UM   | UM  | UM  | UM  | mCHH | UM  |
| AT4G01570 | UM   | UM   | UM   | UM  | UM  | UM  | mCHH | UM  |
| AT4G01575 | UM   | UM   | UM   | UM  | UM  | UM  | UM   | UM  |
| AT4G01580 | UM   | UM   | UM   | UM  | UM  | UM  | mCHH | UM  |
| AT4G01590 | UM   | UM   | UM   | UM  | UM  | UM  | mCHH | UM  |
| AT4G01595 | UM   | UM   | UM   | UM  | UM  | UM  | UM   | UM  |
| AT4G01600 | UM   | UM   | UM   | UM  | UM  | UM  | UM   | UM  |
| AT4G01610 | UM   | UM   | UM   | UM  | UM  | UM  | mCHH | UM  |
| AT4G01630 | UM   | UM   | UM   | UM  | UM  | UM  | mCHH | UM  |
| AT4G01640 | UM   | UM   | UM   | UM  | UM  | UM  | UM   | UM  |
| AT4G01650 | UM   | UM   | UM   | UM  | UM  | UM  | UM   | UM  |
| AT4G01660 | UM   | UM   | UM   | UM  | UM  | UM  | mCHH | UM  |
| AT4G01670 | UM   | UM   | UM   | UM  | UM  | UM  | UM   | UM  |
| AT4G01671 | UM   | UM   | UM   | UM  | UM  | UM  | UM   | UM  |



|           |     |      |     |     |     |     |      |     |
|-----------|-----|------|-----|-----|-----|-----|------|-----|
| AT4G02070 | gbM | gbM  | gbM | UM  | UM  | UM  | mCHH | UM  |
| AT4G02075 | UM  | UM   | UM  | UM  | UM  | UM  | UM   | UM  |
| AT4G02080 | UM  | UM   | UM  | UM  | UM  | UM  | UM   | UM  |
| AT4G02090 | UM  | UM   | UM  | UM  | UM  | UM  | UM   | UM  |
| AT4G02100 | UM  | UM   | UM  | UM  | UM  | UM  | UM   | UM  |
| AT4G02110 | UM  | mCHH | UM  | UM  | UM  | UM  | mCHH | UM  |
| AT4G02120 | UM  | UM   | UM  | UM  | UM  | UM  | mCHH | UM  |
| AT4G02130 | UM  | UM   | UM  | UM  | UM  | UM  | UM   | UM  |
| AT4G02140 | UM  | UM   | UM  | UM  | UM  | UM  | UM   | UM  |
| AT4G02150 | gbM | gbM  | gbM | gbM | UM  | UM  | mCHH | UM  |
| AT4G02160 | UM  | UM   | UM  | UM  | UM  | UM  | UM   | UM  |
| AT4G02170 | UM  | UM   | UM  | UM  | UM  | UM  | UM   | UM  |
| AT4G02180 | UM  | UM   | UM  | UM  | UM  | UM  | mCHH | UM  |
| AT4G02190 | UM  | UM   | UM  | UM  | UM  | UM  | mCHH | UM  |
| AT4G02195 | UM  | UM   | UM  | UM  | UM  | UM  | mCHH | UM  |
| AT4G02200 | UM  | UM   | UM  | UM  | UM  | UM  | UM   | UM  |
| AT4G02210 | UM  | UM   | UM  | UM  | UM  | UM  | mCHH | UM  |
| AT4G02220 | gbM | gbM  | gbM | gbM | gbM | gbM | mCHH | gbM |
| AT4G02230 | UM  | UM   | UM  | UM  | UM  | UM  | UM   | UM  |
| AT4G02235 | UM  | UM   | UM  | UM  | UM  | UM  | UM   | UM  |
| AT4G02250 | UM  | UM   | UM  | UM  | UM  | UM  | UM   | UM  |
| AT4G02260 | gbM | mCHH | gbM | gbM | gbM | gbM | mCHH | gbM |
| AT4G02270 | UM  | UM   | UM  | UM  | UM  | UM  | UM   | UM  |
| AT4G02280 | UM  | UM   | UM  | UM  | UM  | UM  | mCHH | UM  |
| AT4G02290 | UM  | UM   | UM  | UM  | UM  | UM  | mCHH | UM  |
| AT4G02300 | UM  | UM   | UM  | UM  | UM  | UM  | UM   | UM  |
| AT4G02310 | UM  | UM   | UM  | UM  | UM  | UM  | mCHH | UM  |
| AT4G02320 | UM  | UM   | UM  | UM  | UM  | UM  | UM   | UM  |
| AT4G02325 | UM  | UM   | UM  | UM  | UM  | UM  | UM   | UM  |
| AT4G02330 | UM  | UM   | UM  | UM  | UM  | UM  | mCHH | UM  |
| AT4G02340 | UM  | UM   | UM  | UM  | UM  | UM  | UM   | UM  |
| AT4G02350 | UM  | UM   | UM  | UM  | UM  | UM  | mCHH | UM  |
| AT4G02360 | UM  | UM   | UM  | UM  | UM  | UM  | UM   | UM  |
| AT4G02370 | UM  | UM   | UM  | UM  | UM  | UM  | UM   | UM  |
| AT4G02380 | UM  | UM   | UM  | UM  | UM  | UM  | UM   | UM  |
| AT4G02390 | gbM | gbM  | gbM | UM  | UM  | UM  | mCHH | UM  |
| AT4G02400 | gbM | UM   | UM  | UM  | UM  | UM  | mCHH | UM  |
| AT4G02405 | UM  | UM   | UM  | UM  | UM  | UM  | UM   | UM  |
| AT4G02410 | UM  | UM   | UM  | UM  | UM  | UM  | UM   | UM  |
| AT4G02420 | UM  | UM   | UM  | UM  | UM  | UM  | UM   | UM  |
| AT4G02425 | UM  | UM   | UM  | UM  | UM  | UM  | UM   | UM  |
| AT4G02430 | gbM | gbM  | gbM | gbM | gbM | gbM | mCHH | gbM |
| AT4G02440 | UM  | UM   | UM  | UM  | UM  | UM  | UM   | UM  |
| AT4G02450 | UM  | UM   | UM  | UM  | UM  | UM  | mCHH | UM  |
| AT4G02460 | gbM | gbM  | gbM | gbM | gbM | gbM | mCHH | gbM |
| AT4G02465 | UM  | UM   | UM  | UM  | UM  | UM  | UM   | UM  |
| AT4G02480 | gbM | gbM  | gbM | UM  | UM  | UM  | mCHH | UM  |
| AT4G02482 | UM  | UM   | UM  | UM  | UM  | UM  | UM   | UM  |



|           |      |      |      |      |      |      |      |      |
|-----------|------|------|------|------|------|------|------|------|
| AT4G02485 | UM   | UM   | UM   | UM   | UM   | UM   | mCHH | UM   |
| AT4G02489 | mCHH | mCHH | mCHH | mCHG | mCHG | mCHH | mCHH | mCHH |
| AT4G02500 | UM   |
| AT4G02510 | gbM  | gbM  | gbM  | gbM  | gbM  | gbM  | mCHH | gbM  |
| AT4G02520 | UM   | UM   | UM   | UM   | UM   | UM   | mCHH | UM   |
| AT4G02530 | UM   |
| AT4G02540 | UM   | UM   | UM   | UM   | UM   | UM   | mCHH | UM   |
| AT4G02541 | UM   |
| AT4G02550 | UM   |
| AT4G02560 | gbM  | gbM  | gbM  | UM   | UM   | UM   | mCHH | UM   |
| AT4G02570 | gbM  | gbM  | gbM  | gbM  | gbM  | gbM  | mCHH | gbM  |
| AT4G02580 | UM   | UM   | UM   | UM   | UM   | UM   | mCHH | UM   |
| AT4G02590 | UM   |
| AT4G02600 | UM   | UM   | UM   | UM   | UM   | UM   | mCHH | UM   |
| AT4G02610 | UM   | UM   | UM   | UM   | UM   | UM   | mCHH | UM   |
| AT4G02620 | UM   |
| AT4G02630 | UM   |
| AT4G02640 | UM   | UM   | UM   | UM   | UM   | UM   | mCHH | UM   |
| AT4G02650 | UM   | UM   | UM   | UM   | UM   | UM   | mCHH | UM   |
| AT4G02655 | gbM  | gbM  | gbM  | gbM  | UM   | UM   | gbM  | UM   |
| AT4G02660 | gbM  | mCHH | gbM  | gbM  | gbM  | gbM  | mCHH | gbM  |
| AT4G02670 | UM   | UM   | UM   | UM   | UM   | UM   | mCHH | UM   |
| AT4G02680 | gbM  | gbM  | gbM  | gbM  | gbM  | gbM  | mCHH | gbM  |
| AT4G02690 | UM   | UM   | UM   | UM   | UM   | UM   | mCHH | UM   |
| AT4G02700 | UM   | UM   | UM   | UM   | UM   | UM   | mCHH | UM   |
| AT4G02710 | mCHH | mCHH | gbM  | gbM  | gbM  | gbM  | mCHH | gbM  |
| AT4G02715 | UM   |
| AT4G02720 | UM   | UM   | UM   | UM   | UM   | UM   | mCHH | UM   |
| AT4G02725 | UM   |
| AT4G02730 | UM   |
| AT4G02733 | UM   | UM   | UM   | UM   | UM   | UM   | mCHH | UM   |
| AT4G02740 | UM   |
| AT4G02750 | gbM  | gbM  | gbM  | UM   | UM   | UM   | mCHH | UM   |
| AT4G02760 | gbM  | gbM  | gbM  | gbM  | gbM  | gbM  | mCHH | gbM  |
| AT4G02770 | UM   |
| AT4G02780 | UM   | UM   | UM   | UM   | UM   | UM   | mCHH | UM   |
| AT4G02790 | UM   | UM   | UM   | UM   | UM   | UM   | mCHH | UM   |
| AT4G02800 | UM   | UM   | UM   | UM   | UM   | UM   | mCHH | UM   |
| AT4G02810 | UM   | UM   | UM   | UM   | UM   | UM   | mCHH | UM   |
| AT4G02820 | UM   |
| AT4G02830 | UM   |
| AT4G02840 | UM   | UM   | UM   | UM   | UM   | UM   | gbM  | UM   |
| AT4G02850 | UM   | UM   | UM   | UM   | UM   | UM   | mCHH | UM   |
| AT4G02860 | UM   | UM   | UM   | UM   | UM   | UM   | mCHH | UM   |
| AT4G02870 | UM   |
| AT4G02871 | UM   |
| AT4G02880 | gbM  | gbM  | gbM  | gbM  | gbM  | gbM  | mCHH | gbM  |
| AT4G02890 | UM   |

|           |      |      |      |      |      |      |      |      |
|-----------|------|------|------|------|------|------|------|------|
| AT4G02900 | gbM  | mCHH | gbM  | gbM  | gbM  | gbM  | mCHH | gbM  |
| AT4G02910 | mCHH | mCHH | mCHH | mCHG | mCHH | mCHH | mCHH | mCHG |
| AT4G02920 | gbM  | gbM  | gbM  | gbM  | gbM  | gbM  | mCHH | gbM  |
| AT4G02930 | UM   | UM   | UM   | UM   | UM   | UM   | mCHH | UM   |
| AT4G02940 | UM   | UM   | UM   | UM   | UM   | UM   | mCHH | UM   |
| AT4G02950 | UM   |
| AT4G02970 | UM   |
| AT4G02980 | UM   | UM   | UM   | UM   | UM   | UM   | mCHH | UM   |
| AT4G02990 | gbM  | gbM  | gbM  | gbM  | gbM  | gbM  | mCHH | gbM  |
| AT4G03000 | gbM  | gbM  | UM   | UM   | UM   | UM   | mCHH | gbM  |
| AT4G03010 | UM   |
| AT4G03020 | gbM  | gbM  | gbM  | gbM  | gbM  | gbM  | mCHH | gbM  |
| AT4G03030 | UM   |
| AT4G03040 | UM   |
| AT4G03050 | UM   | UM   | UM   | UM   | UM   | UM   | mCHH | UM   |
| AT4G03070 | UM   |
| AT4G03080 | gbM  | gbM  | gbM  | gbM  | gbM  | gbM  | mCHH | gbM  |
| AT4G03090 | gbM  | gbM  | gbM  | gbM  | gbM  | gbM  | mCHH | gbM  |
| AT4G03100 | UM   |
| AT4G03110 | UM   | gbM  | UM   | UM   | UM   | UM   | mCHH | UM   |
| AT4G03113 | UM   |
| AT4G03115 | UM   | UM   | UM   | UM   | UM   | UM   | mCHH | UM   |
| AT4G03120 | UM   |
| AT4G03130 | UM   | UM   | UM   | UM   | UM   | UM   | mCHH | UM   |
| AT4G03140 | gbM  |
| AT4G03150 | UM   |
| AT4G03153 | UM   | UM   | UM   | UM   | UM   | UM   | mCHH | UM   |
| AT4G03156 | mCHH | mCHH | mCHH | mCHG | mCHG | mCHG | mCHH | mCHG |
| AT4G03160 | UM   |
| AT4G03165 | UM   | UM   | UM   | UM   | UM   | UM   | mCHH | UM   |
| AT4G03170 | UM   | UM   | UM   | UM   | UM   | UM   | mCHH | UM   |
| AT4G03175 | UM   |
| AT4G03180 | UM   |
| AT4G03190 | UM   |
| AT4G03200 | gbM  | gbM  | gbM  | gbM  | gbM  | gbM  | mCHH | gbM  |
| AT4G03205 | UM   |
| AT4G03210 | UM   |
| AT4G03220 | UM   | UM   | UM   | UM   | UM   | UM   | mCHH | UM   |
| AT4G03230 | gbM  | gbM  | gbM  | gbM  | gbM  | gbM  | mCHH | gbM  |
| AT4G03240 | UM   |
| AT4G03250 | gbM  | gbM  | gbM  | gbM  | gbM  | gbM  | mCHH | gbM  |
| AT4G03260 | gbM  | gbM  | gbM  | gbM  | gbM  | gbM  | mCHH | gbM  |
| AT4G03270 | UM   | UM   | UM   | UM   | UM   | UM   | mCHH | UM   |
| AT4G03280 | UM   | UM   | UM   | UM   | UM   | UM   | mCHH | UM   |
| AT4G03290 | UM   |
| AT4G03292 | UM   |
| AT4G03298 | UM   | UM   | UM   | UM   | UM   | UM   | mCHH | UM   |
| AT4G03320 | UM   |

|           |      |      |      |      |      |      |      |      |
|-----------|------|------|------|------|------|------|------|------|
| AT4G03330 | UM   |
| AT4G03340 | gbM  | gbM  | gbM  | gbM  | UM   | UM   | gbM  | UM   |
| AT4G03350 | UM   |
| AT4G03360 | UM   |
| AT4G03370 | UM   |
| AT4G03380 | mCHH | mCHH | mCHH | UM   | UM   | UM   | mCHH | UM   |
| AT4G03390 | gbM  | gbM  | gbM  | gbM  | gbM  | gbM  | mCHH | gbM  |
| AT4G03400 | UM   |
| AT4G03410 | UM   | UM   | UM   | UM   | UM   | UM   | mCHH | UM   |
| AT4G03415 | UM   | UM   | UM   | UM   | UM   | UM   | mCHH | UM   |
| AT4G03420 | UM   | UM   | UM   | UM   | UM   | UM   | mCHH | UM   |
| AT4G03430 | UM   | gbM  | UM   | UM   | UM   | UM   | mCHH | UM   |
| AT4G03440 | UM   | UM   | UM   | UM   | UM   | UM   | mCHH | UM   |
| AT4G03443 | UM   |
| AT4G03450 | UM   | UM   | UM   | UM   | UM   | UM   | mCHH | UM   |
| AT4G03460 | UM   | mCHH | UM   | UM   | UM   | UM   | mCHH | UM   |
| AT4G03470 | UM   | UM   | UM   | UM   | UM   | UM   | mCHH | UM   |
| AT4G03480 | UM   | UM   | UM   | UM   | UM   | UM   | mCHH | UM   |
| AT4G03490 | UM   | mCHH | UM   | UM   | UM   | UM   | mCHH | UM   |
| AT4G03500 | UM   | UM   | UM   | UM   | UM   | UM   | mCHH | UM   |
| AT4G03505 | UM   |
| AT4G03510 | UM   | gbM  | UM   | UM   | UM   | UM   | gbM  | UM   |
| AT4G03520 | UM   |
| AT4G03540 | UM   |
| AT4G03550 | gbM  | mCHH | gbM  | gbM  | gbM  | gbM  | mCHH | gbM  |
| AT4G03560 | gbM  | gbM  | gbM  | gbM  | gbM  | gbM  | mCHH | gbM  |
| AT4G03565 | UM   | UM   | UM   | UM   | UM   | UM   | mCHH | UM   |
| AT4G03566 | mCHH | mCHH | mCHH | mCHG | mCHG | mCHG | mCHH | mCHH |
| AT4G03570 | mCHH |
| AT4G03580 | mCHH |
| AT4G03590 | mCHH |
| AT4G03600 | UM   |
| AT4G03610 | UM   |
| AT4G03620 | UM   | UM   | UM   | UM   | UM   | UM   | mCHH | UM   |
| AT4G03630 | UM   |
| AT4G03635 | UM   |
| AT4G03723 | mCHH | mCHH | mCHH | mCHG | mCHH | mCHH | mCHH | mCHH |
| AT4G03728 | mCHH |
| AT4G03740 | mCHH | mCHH | mCHH | mCHG | mCHG | mCHH | mCHH | mCHH |
| AT4G03820 | UM   | UM   | UM   | UM   | UM   | UM   | mCHH | UM   |
| AT4G03827 | UM   |
| AT4G03830 | mCHH |
| AT4G03930 | mCHH |
| AT4G03940 | UM   | UM   | UM   | UM   | UM   | UM   | mCHH | UM   |
| AT4G03945 | mCHH |
| AT4G03950 | mCHH |
| AT4G03960 | UM   |
| AT4G03965 | UM   |









|           |      |      |      |      |      |      |      |      |
|-----------|------|------|------|------|------|------|------|------|
| AT4G08140 | UM   |
| AT4G08150 | UM   | UM   | UM   | UM   | UM   | UM   | mCHH | UM   |
| AT4G08151 | UM   |
| AT4G08160 | UM   | UM   | UM   | UM   | UM   | UM   | mCHH | UM   |
| AT4G08170 | gbM  | gbM  | gbM  | UM   | UM   | UM   | gbM  | UM   |
| AT4G08176 | mCHH | mCHH | mCHH | UM   | UM   | UM   | mCHH | UM   |
| AT4G08180 | gbM  | gbM  | gbM  | gbM  | gbM  | gbM  | mCHH | gbM  |
| AT4G08190 | mCHH | mCHH | mCHH | mCHG | mCHG | mCHG | mCHH | mCHG |
| AT4G08210 | gbM  | gbM  | gbM  | gbM  | gbM  | gbM  | mCHH | gbM  |
| AT4G08230 | UM   |
| AT4G08240 | UM   |
| AT4G08250 | gbM  | gbM  | gbM  | gbM  | gbM  | gbM  | mCHH | gbM  |
| AT4G08260 | mCHH |
| AT4G08263 | UM   |
| AT4G08267 | mCHH | mCHH | mCHH | mCHH | UM   | mCHH | mCHH | mCHH |
| AT4G08270 | mCHH | mCHH | mCHH | mCHH | mCHG | mCHH | mCHH | mCHH |
| AT4G08280 | UM   |
| AT4G08290 | gbM  | mCHH | gbM  | gbM  | UM   | UM   | mCHH | gbM  |
| AT4G08300 | UM   |
| AT4G08310 | mCHH | mCHH | gbM  | UM   | gbM  | UM   | mCHH | gbM  |
| AT4G08320 | gbM  | gbM  | gbM  | gbM  | gbM  | gbM  | mCHH | gbM  |
| AT4G08330 | gbM  |
| AT4G08350 | gbM  | gbM  | gbM  | gbM  | gbM  | gbM  | mCHH | gbM  |
| AT4G08351 | UM   |
| AT4G08360 | UM   | UM   | UM   | UM   | UM   | UM   | gbM  | UM   |
| AT4G08370 | mCHH |
| AT4G08380 | mCHH |
| AT4G08390 | UM   | UM   | UM   | UM   | UM   | UM   | mCHH | UM   |
| AT4G08395 | mCHH |
| AT4G08400 | mCHH | mCHH | mCHH | UM   | UM   | mCHG | mCHH | UM   |
| AT4G08406 | UM   |
| AT4G08410 | mCHH | mCHH | mCHH | mCHG | mCHG | mCHH | mCHH | mCHG |
| AT4G08430 | mCHH |
| AT4G08450 | mCHH | mCHH | UM   | UM   | UM   | UM   | mCHH | UM   |
| AT4G08455 | UM   | gbM  | gbM  | UM   | UM   | UM   | gbM  | UM   |
| AT4G08460 | gbM  |
| AT4G08470 | gbM  | gbM  | UM   | UM   | UM   | UM   | mCHH | UM   |
| AT4G08480 | gbM  | gbM  | gbM  | gbM  | gbM  | gbM  | mCHH | gbM  |
| AT4G08485 | mCHH | mCHH | mCHH | UM   | mCHH | mCHH | mCHH | mCHH |
| AT4G08500 | gbM  | gbM  | gbM  | gbM  | UM   | gbM  | mCHH | UM   |
| AT4G08510 | gbM  | gbM  | gbM  | gbM  | UM   | gbM  | gbM  | UM   |
| AT4G08520 | gbM  | gbM  | gbM  | gbM  | gbM  | UM   | mCHH | gbM  |
| AT4G08530 | UM   | UM   | UM   | UM   | UM   | UM   | mCHH | UM   |
| AT4G08540 | gbM  |
| AT4G08550 | gbM  | mCHH | gbM  | gbM  | gbM  | gbM  | mCHH | gbM  |
| AT4G08555 | UM   |
| AT4G08560 | mCHH | mCHH | mCHH | UM   | mCHH | gbM  | mCHH | UM   |
| AT4G08570 | UM   |



|           |      |      |      |      |      |      |      |      |
|-----------|------|------|------|------|------|------|------|------|
| AT4G08580 | mCHH | mCHH | gbM  | gbM  | gbM  | gbM  | mCHH | gbM  |
| AT4G08590 | UM   | UM   | UM   | UM   | UM   | UM   | mCHH | UM   |
| AT4G08593 | mCHH |
| AT4G08620 | mCHH | mCHH | UM   | UM   | UM   | UM   | mCHH | UM   |
| AT4G08630 | mCHH |
| AT4G08640 | mCHH |
| AT4G08670 | UM   | UM   | UM   | UM   | UM   | UM   | mCHH | UM   |
| AT4G08685 | UM   |
| AT4G08690 | mCHG | gbM  | gbM  | gbM  | gbM  | gbM  | mCHH | gbM  |
| AT4G08691 | mCHH | mCHH | mCHH | mCHH | mCHH | mCHG | mCHH | mCHG |
| AT4G08700 | mCHH | gbM  | UM   | UM   | UM   | UM   | mCHH | UM   |
| AT4G08730 | UM   |
| AT4G08740 | UM   |
| AT4G08760 | mCHH |
| AT4G08770 | gbM  | gbM  | UM   | UM   | gbM  | UM   | mCHH | UM   |
| AT4G08780 | gbM  | mCHH | gbM  | UM   | UM   | UM   | mCHH | UM   |
| AT4G08790 | UM   | UM   | UM   | UM   | UM   | UM   | gbM  | UM   |
| AT4G08800 | UM   | UM   | UM   | UM   | UM   | gbM  | mCHH | UM   |
| AT4G08810 | gbM  | gbM  | gbM  | UM   | gbM  | UM   | mCHH | gbM  |
| AT4G08840 | UM   | UM   | UM   | UM   | UM   | UM   | mCHH | UM   |
| AT4G08850 | UM   | UM   | UM   | UM   | UM   | UM   | mCHH | UM   |
| AT4G08867 | UM   |
| AT4G08868 | UM   |
| AT4G08869 | mCHH | mCHH | UM   | UM   | UM   | UM   | mCHH | UM   |
| AT4G08870 | gbM  | gbM  | UM   | UM   | UM   | UM   | mCHH | UM   |
| AT4G08874 | mCHH | mCHH | mCHH | mCHH | mCHG | mCHH | mCHH | mCHG |
| AT4G08875 | mCHH | mCHH | UM   | mCHG | UM   | UM   | mCHH | UM   |
| AT4G08876 | mCHH |
| AT4G08878 | mCHH |
| AT4G08895 | UM   | UM   | UM   | UM   | UM   | UM   | mCHH | UM   |
| AT4G08900 | UM   |
| AT4G08910 | UM   | UM   | UM   | UM   | UM   | UM   | mCHH | UM   |
| AT4G08920 | gbM  | gbM  | gbM  | gbM  | gbM  | gbM  | mCHH | gbM  |
| AT4G08930 | UM   | UM   | UM   | UM   | UM   | UM   | mCHH | UM   |
| AT4G08940 | UM   | UM   | UM   | UM   | UM   | UM   | gbM  | UM   |
| AT4G08949 | UM   |
| AT4G08950 | UM   |
| AT4G08960 | UM   |
| AT4G08967 | mCHH | mCHH | mCHH | UM   | mCHH | UM   | mCHH | UM   |
| AT4G08980 | UM   | gbM  | gbM  | UM   | UM   | UM   | gbM  | UM   |
| AT4G08990 | mCHH |
| AT4G09000 | UM   |
| AT4G09010 | UM   | UM   | UM   | UM   | UM   | UM   | mCHH | UM   |
| AT4G09012 | mCHH | mCHH | mCHH | UM   | mCHH | UM   | mCHH | UM   |
| AT4G09020 | gbM  | gbM  | gbM  | UM   | UM   | UM   | mCHH | UM   |
| AT4G09030 | UM   |
| AT4G09040 | UM   | UM   | gbM  | UM   | UM   | UM   | gbM  | UM   |
| AT4G09060 | UM   | UM   | UM   | UM   | UM   | UM   | mCHH | UM   |





|           |      |      |      |      |      |      |      |      |
|-----------|------|------|------|------|------|------|------|------|
| AT4G10040 | UM   |
| AT4G10050 | UM   |
| AT4G10060 | gbM  | gbM  | gbM  | UM   | UM   | UM   | mCHH | UM   |
| AT4G10070 | gbM  | gbM  | gbM  | gbM  | gbM  | gbM  | mCHH | gbM  |
| AT4G10080 | UM   |
| AT4G10090 | UM   |
| AT4G10100 | UM   |
| AT4G10110 | UM   |
| AT4G10112 | mCHH | mCHH | mCHH | mCHH | mCHH | mCHG | mCHH | mCHG |
| AT4G10115 | UM   |
| AT4G10120 | gbM  | gbM  | gbM  | gbM  | gbM  | gbM  | mCHH | gbM  |
| AT4G10130 | UM   |
| AT4G10140 | UM   |
| AT4G10150 | UM   |
| AT4G10160 | UM   |
| AT4G10170 | UM   |
| AT4G10180 | UM   | UM   | UM   | UM   | UM   | UM   | mCHG | UM   |
| AT4G10190 | mCHH | mCHH | mCHH | mCHG | mCHG | mCHH | mCHH | mCHH |
| AT4G10200 | UM   | mCHH | UM   | UM   | UM   | UM   | mCHH | UM   |
| AT4G10210 | mCHH | mCHH | UM   | UM   | UM   | UM   | mCHH | UM   |
| AT4G10220 | mCHH | UM   | UM   | UM   | UM   | UM   | mCHH | UM   |
| AT4G10230 | mCHH | mCHG |
| AT4G10240 | UM   |
| AT4G10250 | UM   |
| AT4G10260 | UM   | UM   | UM   | UM   | UM   | UM   | mCHH | UM   |
| AT4G10265 | UM   |
| AT4G10270 | UM   |
| AT4G10280 | UM   |
| AT4G10290 | UM   | UM   | UM   | UM   | UM   | UM   | mCHH | UM   |
| AT4G10300 | UM   |
| AT4G10310 | UM   | UM   | UM   | UM   | UM   | UM   | mCHH | UM   |
| AT4G10320 | gbM  | gbM  | gbM  | gbM  | gbM  | gbM  | mCHH | gbM  |
| AT4G10330 | UM   |
| AT4G10340 | UM   | UM   | UM   | UM   | UM   | UM   | mCHH | UM   |
| AT4G10350 | UM   | UM   | UM   | UM   | UM   | UM   | mCHH | UM   |
| AT4G10360 | UM   |
| AT4G10370 | UM   | UM   | UM   | UM   | UM   | UM   | mCHH | UM   |
| AT4G10380 | UM   | UM   | UM   | UM   | UM   | UM   | mCHH | UM   |
| AT4G10390 | UM   |
| AT4G10400 | UM   | UM   | UM   | UM   | UM   | UM   | mCHH | UM   |
| AT4G10410 | UM   | UM   | UM   | UM   | UM   | UM   | mCHH | UM   |
| AT4G10420 | UM   | UM   | UM   | UM   | UM   | UM   | mCHH | UM   |
| AT4G10430 | UM   | UM   | UM   | UM   | UM   | UM   | mCHH | UM   |
| AT4G10440 | UM   | UM   | UM   | gbM  | UM   | UM   | mCHH | UM   |
| AT4G10450 | UM   |
| AT4G10457 | UM   | UM   | UM   | UM   | UM   | UM   | mCHH | UM   |
| AT4G10465 | UM   |
| AT4G10470 | UM   | UM   | UM   | UM   | UM   | UM   | mCHH | UM   |



|           |      |      |      |     |     |     |      |     |
|-----------|------|------|------|-----|-----|-----|------|-----|
| AT4G10920 | UM   | UM   | UM   | UM  | UM  | UM  | UM   | UM  |
| AT4G10925 | UM   | UM   | UM   | UM  | UM  | UM  | mCHH | UM  |
| AT4G10930 | mCHH | mCHH | gbM  | gbM | gbM | gbM | mCHH | gbM |
| AT4G10940 | UM   | UM   | UM   | UM  | UM  | UM  | UM   | UM  |
| AT4G10950 | UM   | UM   | UM   | UM  | UM  | UM  | mCHH | UM  |
| AT4G10955 | gbM  | gbM  | gbM  | gbM | gbM | gbM | mCHH | gbM |
| AT4G10960 | UM   | UM   | UM   | UM  | UM  | UM  | mCHH | UM  |
| AT4G10970 | UM   | UM   | UM   | UM  | UM  | UM  | mCHH | UM  |
| AT4G11000 | UM   | UM   | UM   | UM  | UM  | UM  | mCHH | UM  |
| AT4G11010 | UM   | UM   | UM   | UM  | UM  | UM  | mCHH | UM  |
| AT4G11020 | UM   | UM   | UM   | UM  | UM  | UM  | UM   | UM  |
| AT4G11030 | UM   | UM   | UM   | UM  | UM  | UM  | mCHH | UM  |
| AT4G11040 | UM   | UM   | UM   | UM  | UM  | UM  | mCHH | UM  |
| AT4G11050 | UM   | UM   | UM   | UM  | UM  | UM  | mCHH | UM  |
| AT4G11060 | UM   | UM   | UM   | UM  | UM  | UM  | UM   | UM  |
| AT4G11070 | mCHH | mCHH | mCHH | UM  | UM  | UM  | mCHH | UM  |
| AT4G11080 | UM   | mCHH | UM   | UM  | UM  | UM  | mCHH | UM  |
| AT4G11090 | UM   | UM   | UM   | UM  | UM  | UM  | mCHH | UM  |
| AT4G11100 | UM   | mCHH | UM   | UM  | UM  | UM  | UM   | UM  |
| AT4G11110 | gbM  | gbM  | gbM  | gbM | gbM | gbM | mCHH | gbM |
| AT4G11120 | UM   | UM   | UM   | UM  | UM  | UM  | UM   | UM  |
| AT4G11130 | gbM  | gbM  | gbM  | gbM | gbM | gbM | mCHH | gbM |
| AT4G11140 | UM   | UM   | UM   | UM  | UM  | UM  | UM   | UM  |
| AT4G11150 | UM   | UM   | UM   | UM  | UM  | UM  | mCHH | UM  |
| AT4G11160 | gbM  | gbM  | gbM  | gbM | gbM | gbM | mCHH | gbM |
| AT4G11170 | UM   | UM   | UM   | UM  | UM  | UM  | mCHH | UM  |
| AT4G11175 | UM   | UM   | UM   | UM  | UM  | UM  | UM   | UM  |
| AT4G11180 | UM   | UM   | UM   | UM  | UM  | UM  | UM   | UM  |
| AT4G11190 | UM   | UM   | UM   | UM  | UM  | UM  | UM   | UM  |
| AT4G11210 | UM   | UM   | UM   | UM  | UM  | UM  | UM   | UM  |
| AT4G11211 | UM   | UM   | UM   | UM  | UM  | UM  | UM   | UM  |
| AT4G11220 | UM   | UM   | UM   | UM  | UM  | UM  | mCHH | UM  |
| AT4G11230 | UM   | UM   | UM   | UM  | UM  | UM  | mCHH | UM  |
| AT4G11240 | UM   | UM   | UM   | UM  | UM  | UM  | UM   | UM  |
| AT4G11250 | UM   | UM   | UM   | UM  | UM  | UM  | UM   | UM  |
| AT4G11260 | gbM  | gbM  | gbM  | gbM | gbM | gbM | mCHH | gbM |
| AT4G11270 | gbM  | gbM  | gbM  | gbM | gbM | gbM | mCHH | gbM |
| AT4G11280 | UM   | UM   | UM   | UM  | UM  | UM  | UM   | UM  |
| AT4G11290 | UM   | UM   | UM   | UM  | UM  | UM  | UM   | UM  |
| AT4G11300 | UM   | UM   | UM   | UM  | UM  | UM  | UM   | UM  |
| AT4G11310 | UM   | UM   | UM   | UM  | UM  | UM  | UM   | UM  |
| AT4G11320 | UM   | UM   | UM   | UM  | UM  | UM  | UM   | UM  |
| AT4G11330 | UM   | UM   | UM   | UM  | UM  | UM  | UM   | UM  |
| AT4G11340 | UM   | UM   | UM   | UM  | UM  | UM  | mCHH | UM  |
| AT4G11350 | UM   | UM   | UM   | UM  | UM  | UM  | UM   | UM  |
| AT4G11360 | UM   | UM   | UM   | UM  | UM  | UM  | UM   | UM  |
| AT4G11370 | UM   | UM   | UM   | UM  | UM  | UM  | UM   | UM  |
| AT4G11380 | gbM  | mCHH | gbM  | gbM | gbM | gbM | mCHH | gbM |

|           |      |      |      |     |     |      |      |     |
|-----------|------|------|------|-----|-----|------|------|-----|
| AT4G11385 | UM   | UM   | UM   | UM  | UM  | UM   | mCHH | UM  |
| AT4G11390 | UM   | UM   | UM   | UM  | UM  | UM   | mCHH | UM  |
| AT4G11393 | UM   | UM   | UM   | UM  | UM  | UM   | mCHH | UM  |
| AT4G11400 | UM   | UM   | UM   | UM  | UM  | UM   | mCHH | UM  |
| AT4G11410 | UM   | UM   | UM   | UM  | UM  | UM   | mCHH | UM  |
| AT4G11420 | gbM  | gbM  | gbM  | gbM | UM  | gbM  | mCHH | UM  |
| AT4G11430 | mCHH | mCHH | mCHH | UM  | UM  | mCHG | mCHH | UM  |
| AT4G11440 | gbM  | gbM  | gbM  | gbM | gbM | gbM  | mCHH | gbM |
| AT4G11450 | gbM  | gbM  | gbM  | gbM | gbM | UM   | mCHH | UM  |
| AT4G11460 | UM   | UM   | UM   | UM  | UM  | UM   | UM   | UM  |
| AT4G11470 | UM   | UM   | UM   | UM  | UM  | UM   | mCHH | UM  |
| AT4G11480 | UM   | mCHH | UM   | UM  | UM  | UM   | mCHH | UM  |
| AT4G11485 | UM   | UM   | UM   | UM  | UM  | UM   | UM   | UM  |
| AT4G11490 | UM   | UM   | UM   | UM  | UM  | UM   | mCHH | UM  |
| AT4G11510 | UM   | UM   | UM   | UM  | UM  | UM   | UM   | UM  |
| AT4G11521 | UM   | UM   | UM   | UM  | UM  | UM   | UM   | UM  |
| AT4G11530 | UM   | UM   | UM   | UM  | UM  | UM   | UM   | UM  |
| AT4G11540 | UM   | UM   | UM   | UM  | UM  | UM   | mCHH | UM  |
| AT4G11550 | UM   | UM   | UM   | UM  | UM  | UM   | UM   | UM  |
| AT4G11560 | gbM  | mCHH | gbM  | UM  | UM  | UM   | mCHH | UM  |
| AT4G11570 | UM   | UM   | UM   | UM  | UM  | UM   | UM   | UM  |
| AT4G11580 | UM   | UM   | UM   | UM  | UM  | UM   | UM   | UM  |
| AT4G11590 | UM   | UM   | UM   | UM  | UM  | UM   | mCHH | UM  |
| AT4G11600 | UM   | UM   | UM   | UM  | UM  | UM   | UM   | UM  |
| AT4G11610 | UM   | UM   | UM   | UM  | UM  | UM   | mCHH | UM  |
| AT4G11630 | UM   | UM   | UM   | UM  | UM  | UM   | mCHH | UM  |
| AT4G11640 | UM   | UM   | UM   | UM  | UM  | UM   | UM   | UM  |
| AT4G11650 | UM   | UM   | UM   | UM  | UM  | UM   | UM   | UM  |
| AT4G11653 | UM   | UM   | UM   | UM  | UM  | UM   | UM   | UM  |
| AT4G11655 | UM   | UM   | UM   | UM  | UM  | UM   | mCHH | UM  |
| AT4G11660 | UM   | UM   | UM   | UM  | UM  | UM   | UM   | UM  |
| AT4G11670 | gbM  | gbM  | gbM  | gbM | gbM | gbM  | mCHH | gbM |
| AT4G11680 | UM   | UM   | UM   | UM  | UM  | UM   | UM   | UM  |
| AT4G11690 | UM   | UM   | UM   | UM  | UM  | UM   | mCHH | UM  |
| AT4G11700 | UM   | mCHH | UM   | UM  | UM  | UM   | mCHH | UM  |
| AT4G11720 | UM   | UM   | UM   | UM  | UM  | UM   | mCHH | UM  |
| AT4G11730 | UM   | UM   | UM   | UM  | UM  | UM   | mCHH | UM  |
| AT4G11740 | gbM  | gbM  | gbM  | UM  | UM  | UM   | mCHH | UM  |
| AT4G11745 | UM   | UM   | UM   | UM  | UM  | UM   | UM   | UM  |
| AT4G11750 | UM   | UM   | UM   | UM  | UM  | UM   | mCHH | UM  |
| AT4G11760 | UM   | UM   | UM   | UM  | UM  | UM   | UM   | UM  |
| AT4G11770 | UM   | UM   | UM   | UM  | UM  | UM   | UM   | UM  |
| AT4G11780 | UM   | UM   | UM   | UM  | UM  | UM   | mCHH | UM  |
| AT4G11790 | UM   | UM   | UM   | UM  | UM  | UM   | mCHH | UM  |
| AT4G11800 | gbM  | mCHH | gbM  | gbM | gbM | gbM  | mCHH | gbM |
| AT4G11810 | UM   | UM   | UM   | UM  | UM  | UM   | mCHH | UM  |
| AT4G11820 | gbM  | gbM  | gbM  | gbM | gbM | gbM  | mCHH | gbM |
| AT4G11830 | gbM  | gbM  | gbM  | gbM | gbM | gbM  | mCHH | gbM |

|           |      |      |      |     |     |     |      |     |
|-----------|------|------|------|-----|-----|-----|------|-----|
| AT4G11840 | gbM  | gbM  | gbM  | gbM | gbM | gbM | mCHH | gbM |
| AT4G11845 | UM   | UM   | UM   | UM  | UM  | UM  | UM   | UM  |
| AT4G11850 | gbM  | gbM  | gbM  | gbM | gbM | gbM | mCHH | gbM |
| AT4G11860 | gbM  | gbM  | gbM  | gbM | gbM | gbM | mCHH | gbM |
| AT4G11870 | UM   | UM   | UM   | UM  | UM  | UM  | UM   | UM  |
| AT4G11876 | UM   | UM   | UM   | UM  | UM  | UM  | UM   | UM  |
| AT4G11880 | mCHH | mCHH | mCHH | UM  | UM  | UM  | mCHH | UM  |
| AT4G11890 | UM   | UM   | UM   | UM  | UM  | UM  | mCHH | UM  |
| AT4G11900 | UM   | UM   | UM   | UM  | UM  | UM  | mCHH | UM  |
| AT4G11910 | UM   | UM   | UM   | UM  | UM  | UM  | UM   | UM  |
| AT4G11911 | UM   | UM   | UM   | UM  | UM  | UM  | UM   | UM  |
| AT4G11920 | UM   | UM   | UM   | UM  | UM  | UM  | mCHH | UM  |
| AT4G11930 | UM   | UM   | UM   | UM  | UM  | UM  | UM   | UM  |
| AT4G11940 | UM   | UM   | UM   | UM  | UM  | UM  | UM   | UM  |
| AT4G11950 | UM   | UM   | UM   | UM  | UM  | UM  | UM   | UM  |
| AT4G11960 | UM   | UM   | UM   | UM  | UM  | UM  | mCHH | UM  |
| AT4G11970 | gbM  | gbM  | gbM  | gbM | gbM | gbM | mCHH | gbM |
| AT4G11980 | UM   | UM   | UM   | UM  | UM  | UM  | UM   | UM  |
| AT4G11990 | UM   | UM   | UM   | UM  | UM  | UM  | UM   | UM  |
| AT4G12000 | UM   | UM   | UM   | UM  | UM  | UM  | UM   | UM  |
| AT4G12005 | UM   | UM   | UM   | UM  | UM  | UM  | UM   | UM  |
| AT4G12010 | UM   | UM   | UM   | UM  | UM  | UM  | mCHH | UM  |
| AT4G12020 | gbM  | gbM  | gbM  | gbM | gbM | gbM | mCHH | gbM |
| AT4G12030 | UM   | UM   | UM   | UM  | UM  | UM  | mCHH | UM  |
| AT4G12040 | gbM  | gbM  | gbM  | gbM | gbM | UM  | gbM  | gbM |
| AT4G12050 | UM   | UM   | UM   | UM  | UM  | UM  | UM   | UM  |
| AT4G12060 | UM   | UM   | UM   | UM  | UM  | UM  | mCHH | UM  |
| AT4G12070 | UM   | UM   | UM   | UM  | UM  | UM  | UM   | UM  |
| AT4G12080 | UM   | UM   | UM   | UM  | UM  | UM  | UM   | UM  |
| AT4G12090 | UM   | UM   | UM   | UM  | UM  | UM  | mCHH | UM  |
| AT4G12100 | UM   | UM   | UM   | UM  | UM  | UM  | mCHH | UM  |
| AT4G12110 | UM   | UM   | UM   | UM  | UM  | UM  | UM   | UM  |
| AT4G12120 | gbM  | gbM  | gbM  | gbM | UM  | UM  | mCHH | UM  |
| AT4G12130 | UM   | UM   | UM   | UM  | UM  | UM  | UM   | UM  |
| AT4G12140 | UM   | UM   | UM   | UM  | UM  | UM  | UM   | UM  |
| AT4G12150 | UM   | UM   | UM   | UM  | UM  | UM  | UM   | UM  |
| AT4G12170 | UM   | UM   | UM   | UM  | UM  | UM  | UM   | UM  |
| AT4G12190 | UM   | UM   | UM   | UM  | UM  | UM  | UM   | UM  |
| AT4G12210 | UM   | UM   | UM   | UM  | UM  | UM  | UM   | UM  |
| AT4G12220 | UM   | UM   | UM   | UM  | UM  | UM  | UM   | UM  |
| AT4G12230 | gbM  | gbM  | gbM  | UM  | UM  | UM  | mCHH | UM  |
| AT4G12240 | UM   | UM   | UM   | UM  | UM  | UM  | mCHG | UM  |
| AT4G12250 | UM   | UM   | UM   | UM  | UM  | UM  | UM   | UM  |
| AT4G12270 | UM   | UM   | UM   | UM  | UM  | UM  | UM   | UM  |
| AT4G12280 | UM   | UM   | UM   | UM  | UM  | UM  | mCHH | UM  |
| AT4G12290 | UM   | UM   | UM   | UM  | UM  | UM  | UM   | UM  |
| AT4G12300 | UM   | UM   | UM   | UM  | UM  | UM  | UM   | UM  |
| AT4G12310 | UM   | UM   | UM   | UM  | UM  | UM  | UM   | UM  |



|           |      |      |      |     |     |     |      |     |
|-----------|------|------|------|-----|-----|-----|------|-----|
| AT4G12320 | UM   | UM   | UM   | UM  | UM  | UM  | UM   | UM  |
| AT4G12330 | UM   | UM   | UM   | UM  | UM  | UM  | mCHH | UM  |
| AT4G12334 | UM   | UM   | UM   | UM  | UM  | UM  | UM   | UM  |
| AT4G12340 | gbM  | gbM  | gbM  | UM  | gbM | gbM | gbM  | UM  |
| AT4G12350 | UM   | UM   | UM   | UM  | UM  | UM  | mCHH | UM  |
| AT4G12360 | UM   | UM   | UM   | UM  | UM  | UM  | mCHH | UM  |
| AT4G12370 | UM   | UM   | UM   | UM  | UM  | UM  | UM   | UM  |
| AT4G12380 | UM   | UM   | UM   | UM  | UM  | UM  | UM   | UM  |
| AT4G12382 | UM   | UM   | UM   | UM  | UM  | UM  | UM   | UM  |
| AT4G12390 | UM   | UM   | UM   | UM  | UM  | UM  | UM   | UM  |
| AT4G12400 | UM   | UM   | UM   | UM  | UM  | UM  | mCHH | UM  |
| AT4G12410 | UM   | UM   | UM   | UM  | UM  | UM  | UM   | UM  |
| AT4G12420 | gbM  | gbM  | gbM  | gbM | gbM | gbM | mCHH | gbM |
| AT4G12430 | UM   | UM   | UM   | UM  | UM  | UM  | mCHH | UM  |
| AT4G12432 | UM   | UM   | UM   | UM  | UM  | UM  | UM   | UM  |
| AT4G12440 | UM   | UM   | UM   | UM  | UM  | UM  | UM   | UM  |
| AT4G12450 | UM   | UM   | UM   | UM  | UM  | UM  | UM   | UM  |
| AT4G12460 | gbM  | gbM  | UM   | UM  | UM  | UM  | mCHH | UM  |
| AT4G12470 | UM   | UM   | UM   | UM  | UM  | UM  | UM   | UM  |
| AT4G12480 | UM   | UM   | UM   | UM  | UM  | UM  | UM   | UM  |
| AT4G12490 | UM   | UM   | UM   | UM  | UM  | UM  | UM   | UM  |
| AT4G12500 | UM   | UM   | UM   | UM  | UM  | UM  | UM   | UM  |
| AT4G12510 | UM   | UM   | UM   | UM  | UM  | UM  | UM   | UM  |
| AT4G12520 | UM   | UM   | UM   | UM  | UM  | UM  | UM   | UM  |
| AT4G12530 | UM   | UM   | UM   | UM  | UM  | UM  | UM   | UM  |
| AT4G12540 | gbM  | gbM  | gbM  | gbM | gbM | gbM | mCHH | gbM |
| AT4G12545 | UM   | UM   | UM   | UM  | UM  | UM  | UM   | UM  |
| AT4G12550 | UM   | UM   | UM   | UM  | UM  | UM  | UM   | UM  |
| AT4G12560 | UM   | UM   | UM   | UM  | UM  | UM  | UM   | UM  |
| AT4G12570 | gbM  | mCHH | gbM  | UM  | UM  | UM  | mCHH | UM  |
| AT4G12580 | UM   | UM   | UM   | UM  | UM  | UM  | UM   | UM  |
| AT4G12590 | UM   | UM   | UM   | UM  | UM  | UM  | UM   | UM  |
| AT4G12600 | UM   | UM   | UM   | UM  | UM  | UM  | mCHH | UM  |
| AT4G12610 | UM   | gbM  | gbM  | UM  | UM  | UM  | gbM  | UM  |
| AT4G12617 | UM   | UM   | UM   | UM  | UM  | UM  | UM   | UM  |
| AT4G12620 | UM   | UM   | UM   | UM  | UM  | UM  | mCHH | UM  |
| AT4G12640 | gbM  | gbM  | gbM  | gbM | gbM | gbM | mCHH | gbM |
| AT4G12650 | UM   | UM   | UM   | UM  | UM  | UM  | mCHH | UM  |
| AT4G12670 | mCHH | mCHG | mCHH | UM  | UM  | gbM | mCHH | UM  |
| AT4G12680 | gbM  | gbM  | gbM  | gbM | gbM | gbM | mCHH | gbM |
| AT4G12690 | UM   | UM   | UM   | UM  | UM  | UM  | UM   | UM  |
| AT4G12700 | UM   | UM   | UM   | UM  | UM  | UM  | mCHH | UM  |
| AT4G12710 | UM   | UM   | UM   | UM  | UM  | UM  | UM   | UM  |
| AT4G12720 | UM   | UM   | UM   | UM  | UM  | UM  | UM   | UM  |
| AT4G12730 | UM   | UM   | UM   | UM  | UM  | UM  | UM   | UM  |
| AT4G12731 | UM   | UM   | UM   | UM  | UM  | UM  | UM   | UM  |
| AT4G12735 | UM   | UM   | UM   | UM  | UM  | UM  | UM   | UM  |
| AT4G12740 | mCHH | mCHH | UM   | UM  | UM  | UM  | mCHH | UM  |

|           |      |      |      |     |     |     |      |      |
|-----------|------|------|------|-----|-----|-----|------|------|
| AT4G12750 | gbM  | mCHH | gbM  | gbM | gbM | gbM | mCHH | gbM  |
| AT4G12760 | UM   | UM   | UM   | UM  | UM  | UM  | UM   | UM   |
| AT4G12770 | gbM  | gbM  | gbM  | gbM | gbM | gbM | mCHH | gbM  |
| AT4G12780 | gbM  | mCHH | gbM  | gbM | gbM | gbM | mCHH | gbM  |
| AT4G12790 | UM   | UM   | UM   | UM  | UM  | UM  | UM   | UM   |
| AT4G12800 | UM   | UM   | UM   | UM  | UM  | UM  | UM   | UM   |
| AT4G12810 | mCHH | mCHH | mCHH | UM  | UM  | UM  | mCHH | mCHH |
| AT4G12820 | mCHH | mCHH | mCHH | UM  | UM  | UM  | mCHH | UM   |
| AT4G12825 | UM   | UM   | UM   | UM  | UM  | UM  | UM   | UM   |
| AT4G12830 | UM   | gbM  | UM   | UM  | UM  | UM  | mCHH | gbM  |
| AT4G12840 | gbM  | gbM  | UM   | UM  | gbM | gbM | mCHH | UM   |
| AT4G12850 | UM   | UM   | UM   | UM  | UM  | UM  | UM   | UM   |
| AT4G12860 | UM   | UM   | UM   | UM  | UM  | UM  | mCHH | UM   |
| AT4G12870 | UM   | UM   | UM   | UM  | UM  | UM  | mCHH | UM   |
| AT4G12880 | UM   | UM   | UM   | UM  | UM  | UM  | UM   | UM   |
| AT4G12890 | UM   | UM   | UM   | UM  | UM  | UM  | UM   | UM   |
| AT4G12900 | UM   | UM   | UM   | UM  | UM  | UM  | UM   | UM   |
| AT4G12910 | UM   | UM   | UM   | UM  | UM  | UM  | mCHH | UM   |
| AT4G12920 | UM   | UM   | UM   | UM  | UM  | UM  | mCHH | UM   |
| AT4G12930 | UM   | UM   | UM   | UM  | UM  | UM  | UM   | UM   |
| AT4G12940 | UM   | UM   | UM   | UM  | UM  | UM  | UM   | UM   |
| AT4G12950 | UM   | UM   | UM   | UM  | UM  | UM  | UM   | UM   |
| AT4G12960 | UM   | UM   | UM   | UM  | UM  | UM  | UM   | UM   |
| AT4G12970 | UM   | UM   | UM   | UM  | UM  | UM  | mCHH | UM   |
| AT4G12980 | UM   | UM   | UM   | UM  | UM  | UM  | UM   | UM   |
| AT4G12990 | UM   | UM   | UM   | UM  | UM  | UM  | UM   | UM   |
| AT4G13000 | UM   | UM   | UM   | UM  | UM  | UM  | UM   | UM   |
| AT4G13010 | gbM  | gbM  | gbM  | gbM | gbM | UM  | gbM  | gbM  |
| AT4G13020 | UM   | UM   | UM   | UM  | UM  | UM  | mCHH | UM   |
| AT4G13030 | mCHG | mCHH | mCHG | gbM | gbM | gbM | mCHH | gbM  |
| AT4G13040 | UM   | UM   | UM   | UM  | UM  | UM  | mCHH | UM   |
| AT4G13050 | UM   | UM   | UM   | UM  | UM  | UM  | UM   | UM   |
| AT4G13060 | UM   | UM   | UM   | UM  | UM  | UM  | UM   | UM   |
| AT4G13070 | UM   | UM   | UM   | UM  | UM  | UM  | mCHH | UM   |
| AT4G13075 | mCHH | mCHG | mCHG | UM  | UM  | gbM | mCHH | mCHG |
| AT4G13080 | UM   | UM   | UM   | UM  | UM  | UM  | UM   | UM   |
| AT4G13090 | UM   | UM   | UM   | UM  | UM  | UM  | mCHH | UM   |
| AT4G13095 | UM   | UM   | UM   | UM  | UM  | UM  | UM   | UM   |
| AT4G13100 | UM   | UM   | UM   | UM  | UM  | UM  | UM   | UM   |
| AT4G13110 | UM   | UM   | UM   | UM  | UM  | UM  | UM   | UM   |
| AT4G13130 | UM   | UM   | UM   | UM  | UM  | UM  | mCHH | UM   |
| AT4G13150 | gbM  | gbM  | gbM  | UM  | UM  | UM  | gbM  | UM   |
| AT4G13160 | UM   | UM   | mCHH | UM  | UM  | UM  | mCHH | UM   |
| AT4G13170 | UM   | UM   | UM   | UM  | UM  | UM  | UM   | UM   |
| AT4G13180 | UM   | UM   | UM   | UM  | UM  | UM  | UM   | UM   |
| AT4G13190 | UM   | UM   | UM   | UM  | UM  | UM  | mCHH | UM   |
| AT4G13195 | UM   | UM   | UM   | UM  | UM  | UM  | UM   | UM   |
| AT4G13200 | UM   | UM   | UM   | UM  | UM  | UM  | UM   | UM   |

|           |      |      |      |      |      |      |      |      |
|-----------|------|------|------|------|------|------|------|------|
| AT4G13210 | UM   | UM   | UM   | UM   | UM   | UM   | mCHH | UM   |
| AT4G13220 | UM   |
| AT4G13230 | UM   |
| AT4G13235 | UM   |
| AT4G13240 | UM   | UM   | UM   | UM   | UM   | UM   | mCHH | UM   |
| AT4G13250 | UM   |
| AT4G13260 | UM   |
| AT4G13261 | mCHH | mCHH | mCHH | mCHG | gbM  | mCHH | mCHH | mCHH |
| AT4G13263 | mCHH | mCHH | mCHH | gbM  | gbM  | mCHH | mCHH | mCHH |
| AT4G13266 | UM   |
| AT4G13270 | UM   |
| AT4G13280 | UM   | UM   | UM   | UM   | UM   | UM   | mCHH | UM   |
| AT4G13290 | mCHH | UM   | UM   | UM   | UM   | UM   | mCHH | UM   |
| AT4G13300 | UM   |
| AT4G13310 | UM   | UM   | UM   | UM   | UM   | UM   | mCHH | UM   |
| AT4G13320 | UM   |
| AT4G13330 | UM   | UM   | UM   | UM   | UM   | UM   | mCHG | UM   |
| AT4G13340 | UM   |
| AT4G13345 | UM   | UM   | UM   | UM   | UM   | UM   | mCHH | UM   |
| AT4G13350 | gbM  | gbM  | gbM  | gbM  | gbM  | gbM  | mCHH | gbM  |
| AT4G13360 | UM   | UM   | UM   | UM   | UM   | UM   | mCHH | UM   |
| AT4G13370 | UM   | UM   | UM   | UM   | UM   | UM   | mCHH | UM   |
| AT4G13380 | mCHH | UM   | UM   | UM   | UM   | UM   | mCHH | UM   |
| AT4G13390 | mCHH | mCHH | mCHH | mCHG | mCHH | mCHH | mCHH | mCHG |
| AT4G13395 | UM   |
| AT4G13400 | gbM  | gbM  | gbM  | gbM  | gbM  | gbM  | mCHH | gbM  |
| AT4G13410 | UM   | UM   | UM   | UM   | UM   | UM   | mCHH | UM   |
| AT4G13420 | UM   | mCHH | mCHH | UM   | UM   | UM   | mCHH | gbM  |
| AT4G13430 | gbM  | gbM  | gbM  | gbM  | UM   | gbM  | mCHH | UM   |
| AT4G13440 | UM   |
| AT4G13450 | UM   | UM   | UM   | UM   | UM   | UM   | mCHH | UM   |
| AT4G13460 | UM   | UM   | UM   | UM   | UM   | UM   | mCHH | UM   |
| AT4G13480 | UM   |
| AT4G13490 | UM   |
| AT4G13500 | mCHH | UM   |
| AT4G13510 | UM   |
| AT4G13520 | UM   |
| AT4G13530 | UM   |
| AT4G13540 | UM   | UM   | UM   | UM   | UM   | UM   | mCHH | UM   |
| AT4G13550 | gbM  | gbM  | gbM  | gbM  | gbM  | gbM  | mCHH | gbM  |
| AT4G13560 | UM   |
| AT4G13570 | mCHH |
| AT4G13572 | UM   | UM   | UM   | UM   | UM   | UM   | mCHH | UM   |
| AT4G13575 | UM   | UM   | UM   | UM   | UM   | UM   | mCHH | UM   |
| AT4G13580 | UM   |
| AT4G13590 | gbM  | gbM  | gbM  | UM   | gbM  | gbM  | mCHH | gbM  |
| AT4G13600 | UM   | UM   | UM   | UM   | UM   | UM   | mCHH | UM   |
| AT4G13610 | mCHH | mCHH | mCHG | UM   | UM   | UM   | mCHH | mCHG |

|           |      |      |      |      |      |      |      |      |
|-----------|------|------|------|------|------|------|------|------|
| AT4G13615 | UM   |
| AT4G13620 | UM   | UM   | UM   | UM   | UM   | UM   | mCHH | UM   |
| AT4G13630 | gbM  | gbM  | gbM  | UM   | UM   | gbM  | mCHH | UM   |
| AT4G13640 | UM   | UM   | UM   | UM   | UM   | UM   | mCHH | UM   |
| AT4G13650 | gbM  | gbM  | gbM  | gbM  | gbM  | gbM  | mCHH | gbM  |
| AT4G13660 | UM   | UM   | UM   | UM   | UM   | UM   | mCHH | UM   |
| AT4G13670 | UM   | UM   | UM   | UM   | UM   | UM   | mCHH | UM   |
| AT4G13680 | UM   |
| AT4G13690 | UM   | UM   | UM   | UM   | UM   | UM   | mCHH | UM   |
| AT4G13700 | UM   |
| AT4G13710 | UM   | mCHH | UM   | UM   | UM   | UM   | mCHH | UM   |
| AT4G13720 | UM   | UM   | UM   | UM   | UM   | UM   | mCHH | UM   |
| AT4G13730 | UM   | UM   | UM   | UM   | UM   | UM   | mCHH | UM   |
| AT4G13750 | gbM  | mCHH | gbM  | gbM  | gbM  | gbM  | mCHH | gbM  |
| AT4G13760 | mCHH |
| AT4G13770 | UM   |
| AT4G13780 | gbM  | gbM  | gbM  | gbM  | gbM  | UM   | mCHH | gbM  |
| AT4G13790 | UM   |
| AT4G13800 | UM   | UM   | UM   | UM   | UM   | UM   | mCHH | UM   |
| AT4G13810 | UM   | UM   | UM   | UM   | UM   | UM   | mCHH | UM   |
| AT4G13820 | UM   | mCHH | UM   | UM   | UM   | UM   | mCHH | UM   |
| AT4G13830 | UM   |
| AT4G13840 | UM   |
| AT4G13850 | UM   |
| AT4G13860 | UM   |
| AT4G13870 | UM   |
| AT4G13880 | gbM  | gbM  | gbM  | gbM  | gbM  | gbM  | mCHH | UM   |
| AT4G13885 | mCHH | mCHH | mCHH | UM   | UM   | mCHH | mCHH | UM   |
| AT4G13890 | UM   | UM   | UM   | UM   | UM   | UM   | mCHH | UM   |
| AT4G13920 | gbM  | gbM  | gbM  | gbM  | gbM  | gbM  | mCHH | gbM  |
| AT4G13930 | UM   |
| AT4G13940 | UM   |
| AT4G13950 | UM   |
| AT4G13955 | UM   |
| AT4G13960 | UM   | UM   | UM   | UM   | UM   | UM   | mCHH | UM   |
| AT4G13965 | UM   | UM   | UM   | UM   | UM   | UM   | mCHH | UM   |
| AT4G13968 | UM   | UM   | UM   | UM   | UM   | UM   | mCHH | UM   |
| AT4G13970 | gbM  | gbM  | gbM  | gbM  | gbM  | gbM  | mCHH | gbM  |
| AT4G13980 | gbM  | gbM  | UM   | UM   | UM   | UM   | mCHH | UM   |
| AT4G13985 | UM   |
| AT4G13990 | UM   | UM   | UM   | UM   | UM   | UM   | mCHH | UM   |
| AT4G13992 | mCHH |
| AT4G14000 | UM   |
| AT4G14010 | UM   |
| AT4G14020 | UM   |
| AT4G14030 | UM   |
| AT4G14040 | UM   |
| AT4G14050 | UM   |



|           |      |      |      |      |      |      |      |      |
|-----------|------|------|------|------|------|------|------|------|
| AT4G14365 | UM   | UM   | UM   | UM   | UM   | UM   | mCHH | UM   |
| AT4G14368 | UM   | UM   | UM   | UM   | UM   | UM   | mCHH | UM   |
| AT4G14370 | UM   | UM   | UM   | UM   | UM   | UM   | mCHH | UM   |
| AT4G14380 | UM   | UM   | UM   | UM   | UM   | UM   | mCHH | UM   |
| AT4G14385 | UM   |
| AT4G14390 | UM   | UM   | UM   | UM   | UM   | UM   | mCHH | UM   |
| AT4G14400 | UM   | UM   | UM   | UM   | UM   | UM   | mCHH | UM   |
| AT4G14403 | UM   | UM   | mCHH | UM   | UM   | UM   | UM   | UM   |
| AT4G14410 | UM   |
| AT4G14420 | UM   | UM   | UM   | UM   | UM   | UM   | mCHH | UM   |
| AT4G14430 | UM   |
| AT4G14440 | UM   |
| AT4G14450 | UM   |
| AT4G14455 | UM   |
| AT4G14465 | UM   |
| AT4G14480 | UM   | UM   | UM   | UM   | UM   | UM   | mCHH | UM   |
| AT4G14490 | UM   | UM   | UM   | UM   | UM   | UM   | mCHH | UM   |
| AT4G14500 | UM   |
| AT4G14510 | gbM  | gbM  | UM   | UM   | UM   | UM   | mCHH | UM   |
| AT4G14520 | gbM  |
| AT4G14530 | UM   |
| AT4G14540 | UM   |
| AT4G14550 | UM   |
| AT4G14560 | UM   |
| AT4G14570 | gbM  | gbM  | gbM  | gbM  | gbM  | gbM  | mCHH | gbM  |
| AT4G14580 | UM   |
| AT4G14590 | UM   | UM   | UM   | UM   | UM   | UM   | mCHH | UM   |
| AT4G14600 | UM   |
| AT4G14605 | gbM  | gbM  | gbM  | gbM  | gbM  | gbM  | mCHH | gbM  |
| AT4G14615 | UM   |
| AT4G14620 | UM   |
| AT4G14622 | UM   |
| AT4G14630 | mCHH | mCHH | mCHH | mCHG | mCHH | mCHH | mCHH | mCHH |
| AT4G14640 | UM   | UM   | UM   | UM   | UM   | UM   | mCHH | UM   |
| AT4G14650 | mCHH | mCHH | UM   | UM   | UM   | UM   | mCHH | UM   |
| AT4G14660 | UM   |
| AT4G14670 | UM   | UM   | UM   | UM   | UM   | UM   | mCHH | UM   |
| AT4G14680 | UM   | UM   | UM   | UM   | UM   | UM   | mCHH | UM   |
| AT4G14690 | UM   |
| AT4G14695 | UM   |
| AT4G14700 | UM   | UM   | UM   | UM   | UM   | UM   | mCHH | UM   |
| AT4G14710 | gbM  | gbM  | gbM  | UM   | UM   | UM   | mCHH | UM   |
| AT4G14713 | UM   |
| AT4G14716 | UM   |
| AT4G14720 | UM   | UM   | UM   | UM   | UM   | UM   | mCHH | UM   |
| AT4G14723 | UM   |
| AT4G14730 | UM   |
| AT4G14740 | UM   | UM   | UM   | UM   | UM   | UM   | mCHH | UM   |



|           |     |      |     |     |     |     |      |     |
|-----------|-----|------|-----|-----|-----|-----|------|-----|
| AT4G15100 | UM  | UM   | UM  | UM  | UM  | UM  | mCHH | UM  |
| AT4G15110 | gbM | gbM  | gbM | gbM | gbM | gbM | mCHH | gbM |
| AT4G15120 | UM  | UM   | UM  | UM  | UM  | UM  | UM   | UM  |
| AT4G15130 | UM  | UM   | UM  | UM  | UM  | UM  | mCHH | UM  |
| AT4G15140 | UM  | UM   | UM  | UM  | UM  | UM  | UM   | UM  |
| AT4G15150 | UM  | UM   | UM  | UM  | UM  | UM  | UM   | UM  |
| AT4G15160 | UM  | UM   | UM  | UM  | UM  | UM  | UM   | UM  |
| AT4G15165 | UM  | UM   | UM  | UM  | UM  | UM  | UM   | UM  |
| AT4G15180 | gbM | mCHH | gbM | gbM | gbM | gbM | mCHH | gbM |
| AT4G15200 | UM  | UM   | UM  | UM  | UM  | UM  | mCHH | UM  |
| AT4G15210 | UM  | UM   | UM  | UM  | UM  | UM  | mCHH | UM  |
| AT4G15215 | gbM | gbM  | gbM | gbM | gbM | gbM | mCHH | gbM |
| AT4G15230 | UM  | UM   | UM  | UM  | UM  | UM  | mCHH | UM  |
| AT4G15233 | gbM | mCHH | gbM | UM  | UM  | UM  | mCHH | UM  |
| AT4G15236 | gbM | mCHH | gbM | gbM | gbM | UM  | mCHH | UM  |
| AT4G15240 | UM  | UM   | UM  | UM  | UM  | UM  | UM   | UM  |
| AT4G15248 | UM  | UM   | UM  | UM  | UM  | UM  | UM   | UM  |
| AT4G15250 | UM  | UM   | UM  | UM  | UM  | UM  | mCHH | UM  |
| AT4G15260 | UM  | UM   | UM  | UM  | UM  | UM  | UM   | UM  |
| AT4G15270 | UM  | UM   | UM  | UM  | UM  | UM  | UM   | UM  |
| AT4G15280 | UM  | UM   | UM  | UM  | UM  | UM  | UM   | UM  |
| AT4G15290 | UM  | UM   | UM  | UM  | UM  | UM  | mCHH | UM  |
| AT4G15300 | UM  | UM   | UM  | UM  | UM  | UM  | mCHH | UM  |
| AT4G15310 | UM  | UM   | UM  | UM  | UM  | UM  | mCHH | UM  |
| AT4G15320 | UM  | UM   | UM  | UM  | UM  | UM  | mCHH | UM  |
| AT4G15330 | UM  | UM   | UM  | UM  | UM  | UM  | mCHH | UM  |
| AT4G15340 | UM  | UM   | UM  | UM  | UM  | UM  | mCHH | UM  |
| AT4G15350 | UM  | UM   | UM  | UM  | UM  | UM  | UM   | UM  |
| AT4G15360 | UM  | UM   | UM  | UM  | UM  | UM  | mCHH | UM  |
| AT4G15370 | UM  | UM   | UM  | UM  | UM  | UM  | mCHH | UM  |
| AT4G15380 | UM  | UM   | UM  | UM  | UM  | UM  | mCHH | UM  |
| AT4G15390 | UM  | UM   | UM  | UM  | UM  | UM  | mCHH | UM  |
| AT4G15393 | UM  | UM   | UM  | UM  | UM  | UM  | mCHH | UM  |
| AT4G15396 | UM  | UM   | UM  | UM  | UM  | UM  | mCHH | UM  |
| AT4G15400 | UM  | UM   | UM  | UM  | UM  | UM  | UM   | UM  |
| AT4G15410 | UM  | UM   | UM  | UM  | UM  | UM  | UM   | UM  |
| AT4G15415 | gbM | gbM  | gbM | UM  | gbM | gbM | mCHH | UM  |
| AT4G15417 | UM  | UM   | UM  | UM  | UM  | UM  | mCHH | UM  |
| AT4G15420 | gbM | gbM  | gbM | gbM | gbM | gbM | mCHH | gbM |
| AT4G15430 | UM  | mCHH | UM  | UM  | UM  | UM  | mCHH | UM  |
| AT4G15440 | UM  | UM   | UM  | UM  | UM  | UM  | mCHH | UM  |
| AT4G15450 | UM  | UM   | UM  | UM  | UM  | UM  | UM   | UM  |
| AT4G15460 | UM  | UM   | UM  | UM  | UM  | UM  | UM   | UM  |
| AT4G15470 | UM  | UM   | UM  | UM  | UM  | UM  | UM   | UM  |
| AT4G15475 | UM  | mCHH | UM  | UM  | UM  | UM  | mCHH | UM  |
| AT4G15480 | UM  | UM   | UM  | UM  | UM  | UM  | UM   | UM  |
| AT4G15490 | UM  | UM   | UM  | UM  | UM  | UM  | UM   | UM  |
| AT4G15500 | UM  | UM   | UM  | UM  | UM  | UM  | UM   | UM  |



|           |      |      |     |     |     |     |      |     |
|-----------|------|------|-----|-----|-----|-----|------|-----|
| AT4G15510 | UM   | UM   | UM  | UM  | UM  | UM  | gbM  | UM  |
| AT4G15520 | UM   | UM   | UM  | UM  | UM  | UM  | UM   | UM  |
| AT4G15530 | gbM  | gbM  | UM  | UM  | UM  | UM  | mCHH | UM  |
| AT4G15540 | gbM  | gbM  | gbM | UM  | gbM | UM  | mCHH | UM  |
| AT4G15545 | UM   | UM   | UM  | UM  | UM  | UM  | mCHH | UM  |
| AT4G15550 | UM   | UM   | UM  | UM  | UM  | UM  | UM   | UM  |
| AT4G15560 | gbM  | gbM  | gbM | gbM | gbM | gbM | mCHH | gbM |
| AT4G15563 | UM   | UM   | UM  | UM  | UM  | UM  | UM   | UM  |
| AT4G15570 | gbM  | gbM  | gbM | gbM | gbM | gbM | mCHH | gbM |
| AT4G15610 | UM   | UM   | UM  | UM  | UM  | UM  | UM   | UM  |
| AT4G15620 | UM   | UM   | UM  | UM  | UM  | UM  | UM   | UM  |
| AT4G15630 | UM   | UM   | UM  | UM  | UM  | UM  | UM   | UM  |
| AT4G15640 | UM   | UM   | UM  | UM  | UM  | UM  | mCHH | UM  |
| AT4G15650 | UM   | UM   | UM  | UM  | UM  | UM  | mCHH | UM  |
| AT4G15660 | UM   | UM   | UM  | UM  | UM  | UM  | UM   | UM  |
| AT4G15670 | UM   | UM   | UM  | UM  | UM  | UM  | UM   | UM  |
| AT4G15680 | UM   | UM   | UM  | UM  | UM  | UM  | UM   | UM  |
| AT4G15690 | UM   | UM   | UM  | UM  | UM  | UM  | UM   | UM  |
| AT4G15700 | UM   | UM   | UM  | UM  | UM  | UM  | UM   | UM  |
| AT4G15710 | UM   | UM   | UM  | UM  | UM  | UM  | UM   | UM  |
| AT4G15715 | UM   | UM   | UM  | UM  | UM  | UM  | UM   | UM  |
| AT4G15720 | UM   | gbM  | UM  | UM  | UM  | UM  | mCHH | UM  |
| AT4G15730 | gbM  | mCHH | gbM | gbM | gbM | gbM | mCHH | gbM |
| AT4G15733 | UM   | UM   | UM  | UM  | UM  | UM  | UM   | UM  |
| AT4G15735 | UM   | UM   | UM  | UM  | UM  | UM  | mCHH | UM  |
| AT4G15740 | UM   | UM   | UM  | UM  | UM  | UM  | mCHH | UM  |
| AT4G15750 | UM   | UM   | UM  | UM  | UM  | UM  | UM   | UM  |
| AT4G15755 | UM   | UM   | UM  | UM  | UM  | UM  | UM   | UM  |
| AT4G15760 | UM   | UM   | UM  | UM  | UM  | UM  | UM   | UM  |
| AT4G15765 | UM   | UM   | UM  | UM  | UM  | UM  | UM   | UM  |
| AT4G15770 | UM   | UM   | UM  | UM  | UM  | UM  | UM   | UM  |
| AT4G15780 | UM   | UM   | UM  | UM  | UM  | UM  | UM   | UM  |
| AT4G15790 | UM   | UM   | UM  | UM  | UM  | UM  | UM   | UM  |
| AT4G15800 | UM   | UM   | UM  | UM  | UM  | UM  | UM   | UM  |
| AT4G15802 | UM   | UM   | UM  | UM  | UM  | UM  | UM   | UM  |
| AT4G15810 | mCHH | gbM  | gbM | gbM | gbM | gbM | mCHH | gbM |
| AT4G15820 | UM   | UM   | UM  | UM  | UM  | UM  | mCHH | UM  |
| AT4G15830 | UM   | UM   | UM  | UM  | UM  | UM  | mCHH | UM  |
| AT4G15840 | UM   | UM   | UM  | UM  | UM  | UM  | mCHH | UM  |
| AT4G15850 | gbM  | gbM  | gbM | gbM | gbM | gbM | mCHH | gbM |
| AT4G15870 | UM   | UM   | UM  | UM  | UM  | UM  | mCHH | UM  |
| AT4G15880 | UM   | UM   | UM  | UM  | UM  | UM  | mCHH | UM  |
| AT4G15885 | gbM  | UM   | UM  | UM  | UM  | UM  | UM   | UM  |
| AT4G15890 | gbM  | gbM  | gbM | UM  | UM  | gbM | mCHH | UM  |
| AT4G15900 | UM   | UM   | UM  | UM  | UM  | UM  | mCHH | UM  |
| AT4G15910 | UM   | UM   | UM  | UM  | UM  | UM  | UM   | UM  |
| AT4G15920 | UM   | UM   | UM  | UM  | UM  | UM  | UM   | UM  |
| AT4G15930 | UM   | UM   | UM  | UM  | UM  | UM  | UM   | UM  |

|           |      |      |      |      |      |      |      |      |
|-----------|------|------|------|------|------|------|------|------|
| AT4G15940 | UM   |
| AT4G15950 | UM   |
| AT4G15953 | UM   |
| AT4G15955 | UM   |
| AT4G15960 | UM   | UM   | UM   | UM   | UM   | UM   | mCHH | UM   |
| AT4G15970 | UM   | UM   | UM   | UM   | UM   | UM   | mCHH | UM   |
| AT4G15975 | UM   |
| AT4G15980 | UM   |
| AT4G15990 | UM   |
| AT4G16000 | UM   |
| AT4G16008 | UM   |
| AT4G16015 | mCHH |
| AT4G16024 | UM   |
| AT4G16030 | UM   |
| AT4G16040 | UM   |
| AT4G16045 | UM   | UM   | UM   | UM   | UM   | UM   | mCHH | UM   |
| AT4G16050 | UM   | mCHH | UM   | UM   | UM   | UM   | mCHH | UM   |
| AT4G16060 | UM   | UM   | UM   | UM   | UM   | UM   | mCHH | UM   |
| AT4G16070 | gbM  | mCHG | gbM  | gbM  | gbM  | gbM  | mCHH | gbM  |
| AT4G16080 | UM   |
| AT4G16090 | UM   | UM   | UM   | UM   | UM   | UM   | mCHH | UM   |
| AT4G16095 | UM   |
| AT4G16100 | gbM  | gbM  | gbM  | gbM  | gbM  | gbM  | mCHH | gbM  |
| AT4G16110 | gbM  | gbM  | gbM  | gbM  | gbM  | UM   | mCHH | gbM  |
| AT4G16120 | gbM  | gbM  | gbM  | gbM  | gbM  | gbM  | mCHH | gbM  |
| AT4G16130 | UM   | UM   | UM   | UM   | UM   | UM   | mCHH | UM   |
| AT4G16140 | UM   | UM   | UM   | UM   | UM   | UM   | mCHH | UM   |
| AT4G16141 | UM   |
| AT4G16143 | UM   | UM   | UM   | UM   | UM   | UM   | mCHH | UM   |
| AT4G16144 | gbM  | gbM  | gbM  | gbM  | gbM  | gbM  | mCHH | gbM  |
| AT4G16146 | UM   |
| AT4G16150 | gbM  | gbM  | gbM  | gbM  | gbM  | gbM  | mCHH | gbM  |
| AT4G16155 | UM   | UM   | UM   | UM   | UM   | UM   | mCHH | UM   |
| AT4G16160 | UM   | UM   | UM   | UM   | UM   | UM   | mCHH | UM   |
| AT4G16162 | UM   |
| AT4G16165 | UM   |
| AT4G16180 | gbM  | gbM  | UM   | UM   | UM   | UM   | mCHH | UM   |
| AT4G16190 | UM   |
| AT4G16195 | UM   | mCHG | UM   | mCHG | mCHG | mCHG | mCHG | mCHG |
| AT4G16200 | UM   | UM   | UM   | UM   | UM   | UM   | mCHH | UM   |
| AT4G16210 | UM   |
| AT4G16215 | mCHH | mCHH | mCHH | mCHG | mCHH | mCHH | mCHH | mCHG |
| AT4G16220 | UM   |
| AT4G16230 | UM   | UM   | UM   | UM   | UM   | UM   | mCHH | UM   |
| AT4G16240 | UM   |
| AT4G16250 | gbM  | gbM  | gbM  | gbM  | gbM  | gbM  | mCHH | gbM  |
| AT4G16260 | UM   |
| AT4G16265 | UM   |

|           |      |      |      |      |      |      |      |      |
|-----------|------|------|------|------|------|------|------|------|
| AT4G16270 | UM   |
| AT4G16280 | gbM  | gbM  | gbM  | gbM  | gbM  | gbM  | mCHH | gbM  |
| AT4G16295 | mCHH | mCHH | mCHH | mCHG | mCHG | mCHH | mCHH | mCHG |
| AT4G16310 | gbM  | gbM  | gbM  | gbM  | gbM  | gbM  | mCHH | gbM  |
| AT4G16330 | UM   |
| AT4G16340 | gbM  | mCHH | gbM  | gbM  | gbM  | gbM  | mCHH | gbM  |
| AT4G16350 | UM   |
| AT4G16360 | UM   |
| AT4G16370 | UM   | UM   | UM   | UM   | UM   | UM   | mCHH | UM   |
| AT4G16380 | gbM  | gbM  | UM   | UM   | UM   | gbM  | gbM  | gbM  |
| AT4G16390 | UM   |
| AT4G16400 | UM   | UM   | UM   | UM   | UM   | UM   | mCHH | UM   |
| AT4G16410 | UM   |
| AT4G16420 | gbM  | gbM  | UM   | UM   | UM   | UM   | gbM  | UM   |
| AT4G16430 | UM   | UM   | UM   | UM   | UM   | UM   | mCHH | UM   |
| AT4G16440 | UM   |
| AT4G16442 | UM   |
| AT4G16444 | UM   |
| AT4G16447 | UM   |
| AT4G16450 | UM   |
| AT4G16451 | UM   |
| AT4G16460 | UM   |
| AT4G16470 | UM   |
| AT4G16480 | UM   |
| AT4G16490 | UM   |
| AT4G16500 | UM   |
| AT4G16510 | UM   | UM   | UM   | UM   | UM   | UM   | mCHH | UM   |
| AT4G16515 | UM   |
| AT4G16520 | UM   |
| AT4G16530 | UM   | UM   | UM   | UM   | UM   | UM   | mCHH | UM   |
| AT4G16540 | UM   |
| AT4G16550 | UM   | UM   | UM   | UM   | UM   | UM   | mCHH | UM   |
| AT4G16560 | UM   |
| AT4G16563 | mCHH | UM   | UM   | UM   | UM   | UM   | mCHH | UM   |
| AT4G16566 | UM   |
| AT4G16570 | UM   | UM   | UM   | UM   | UM   | UM   | mCHH | UM   |
| AT4G16580 | gbM  | gbM  | gbM  | gbM  | UM   | gbM  | mCHH | gbM  |
| AT4G16590 | UM   |
| AT4G16600 | UM   | UM   | UM   | UM   | UM   | UM   | mCHH | UM   |
| AT4G16610 | UM   | UM   | UM   | UM   | UM   | UM   | mCHH | UM   |
| AT4G16620 | UM   | UM   | UM   | UM   | UM   | UM   | mCHH | UM   |
| AT4G16630 | gbM  | mCHH | UM   | UM   | UM   | UM   | mCHH | UM   |
| AT4G16640 | UM   |
| AT4G16650 | gbM  | gbM  | gbM  | UM   | gbM  | gbM  | mCHH | UM   |
| AT4G16660 | UM   | UM   | UM   | UM   | UM   | UM   | mCHH | UM   |
| AT4G16670 | UM   |
| AT4G16680 | gbM  | gbM  | UM   | UM   | UM   | UM   | gbM  | UM   |
| AT4G16690 | UM   |



|           |      |      |      |     |     |     |      |     |
|-----------|------|------|------|-----|-----|-----|------|-----|
| AT4G17140 | mCHH | mCHH | gbM  | gbM | gbM | gbM | mCHH | gbM |
| AT4G17150 | gbM  | gbM  | gbM  | gbM | gbM | gbM | mCHH | gbM |
| AT4G17160 | UM   | UM   | UM   | UM  | UM  | UM  | UM   | UM  |
| AT4G17170 | UM   | UM   | UM   | UM  | UM  | UM  | mCHH | UM  |
| AT4G17180 | UM   | UM   | UM   | UM  | UM  | UM  | mCHH | UM  |
| AT4G17190 | UM   | UM   | UM   | UM  | UM  | UM  | mCHH | UM  |
| AT4G17200 | UM   | UM   | UM   | UM  | UM  | UM  | UM   | UM  |
| AT4G17210 | UM   | mCHH | mCHG | UM  | UM  | UM  | mCHH | UM  |
| AT4G17215 | UM   | UM   | UM   | UM  | UM  | UM  | UM   | UM  |
| AT4G17220 | UM   | UM   | UM   | UM  | UM  | UM  | mCHH | UM  |
| AT4G17230 | gbM  | gbM  | gbM  | gbM | gbM | gbM | mCHG | gbM |
| AT4G17240 | UM   | UM   | UM   | UM  | UM  | UM  | UM   | UM  |
| AT4G17245 | UM   | UM   | UM   | UM  | UM  | UM  | UM   | UM  |
| AT4G17250 | UM   | UM   | UM   | UM  | UM  | UM  | mCHH | UM  |
| AT4G17260 | UM   | UM   | UM   | UM  | UM  | UM  | UM   | UM  |
| AT4G17270 | UM   | UM   | UM   | UM  | UM  | UM  | UM   | UM  |
| AT4G17280 | UM   | UM   | UM   | UM  | UM  | UM  | UM   | UM  |
| AT4G17300 | UM   | UM   | UM   | UM  | UM  | UM  | mCHH | UM  |
| AT4G17310 | UM   | UM   | UM   | UM  | UM  | UM  | UM   | UM  |
| AT4G17330 | gbM  | mCHH | gbM  | gbM | gbM | gbM | mCHH | gbM |
| AT4G17340 | UM   | UM   | UM   | UM  | UM  | UM  | UM   | UM  |
| AT4G17350 | UM   | UM   | UM   | UM  | UM  | UM  | UM   | UM  |
| AT4G17360 | UM   | UM   | UM   | UM  | UM  | UM  | UM   | UM  |
| AT4G17370 | UM   | UM   | UM   | UM  | UM  | UM  | UM   | UM  |
| AT4G17380 | UM   | UM   | UM   | UM  | UM  | UM  | mCHH | UM  |
| AT4G17390 | UM   | UM   | UM   | UM  | UM  | UM  | UM   | UM  |
| AT4G17410 | UM   | gbM  | gbM  | UM  | UM  | UM  | mCHH | UM  |
| AT4G17420 | gbM  | gbM  | gbM  | gbM | gbM | gbM | gbM  | gbM |
| AT4G17430 | UM   | UM   | UM   | UM  | UM  | UM  | UM   | UM  |
| AT4G17440 | UM   | UM   | UM   | UM  | UM  | UM  | UM   | UM  |
| AT4G17453 | UM   | UM   | UM   | UM  | UM  | UM  | UM   | UM  |
| AT4G17460 | UM   | UM   | UM   | UM  | UM  | UM  | UM   | UM  |
| AT4G17470 | UM   | UM   | UM   | UM  | UM  | UM  | UM   | UM  |
| AT4G17480 | UM   | UM   | UM   | UM  | UM  | UM  | UM   | UM  |
| AT4G17483 | UM   | UM   | UM   | UM  | UM  | UM  | UM   | UM  |
| AT4G17486 | UM   | UM   | UM   | UM  | UM  | UM  | UM   | UM  |
| AT4G17490 | UM   | UM   | UM   | UM  | UM  | UM  | UM   | UM  |
| AT4G17500 | UM   | UM   | UM   | UM  | UM  | UM  | UM   | UM  |
| AT4G17505 | UM   | UM   | UM   | UM  | UM  | UM  | mCHH | UM  |
| AT4G17510 | UM   | UM   | UM   | UM  | UM  | UM  | UM   | UM  |
| AT4G17520 | UM   | UM   | UM   | UM  | UM  | UM  | UM   | UM  |
| AT4G17530 | UM   | UM   | UM   | UM  | UM  | UM  | UM   | UM  |
| AT4G17540 | UM   | UM   | UM   | UM  | UM  | UM  | UM   | UM  |
| AT4G17550 | UM   | UM   | UM   | UM  | UM  | UM  | UM   | UM  |
| AT4G17560 | UM   | UM   | UM   | UM  | UM  | UM  | mCHH | UM  |
| AT4G17565 | UM   | UM   | UM   | UM  | UM  | UM  | mCHH | UM  |
| AT4G17570 | UM   | UM   | UM   | UM  | UM  | UM  | mCHH | UM  |
| AT4G17580 | UM   | UM   | UM   | UM  | UM  | UM  | mCHH | UM  |

|           |      |      |      |      |      |      |      |      |
|-----------|------|------|------|------|------|------|------|------|
| AT4G17585 | UM   |
| AT4G17590 | mCHH |
| AT4G17600 | UM   |
| AT4G17610 | gbM  | gbM  | gbM  | gbM  | gbM  | gbM  | mCHH | gbM  |
| AT4G17615 | UM   | UM   | UM   | UM   | UM   | UM   | mCHH | UM   |
| AT4G17616 | UM   | gbM  | UM   | gbM  | UM   | UM   | mCHH | UM   |
| AT4G17620 | UM   | UM   | UM   | UM   | UM   | UM   | mCHH | UM   |
| AT4G17640 | UM   | UM   | UM   | UM   | UM   | UM   | mCHH | UM   |
| AT4G17650 | UM   |
| AT4G17660 | UM   | UM   | UM   | UM   | UM   | UM   | mCHH | UM   |
| AT4G17670 | mCHH | UM   | UM   | UM   | UM   | UM   | mCHH | UM   |
| AT4G17680 | UM   |
| AT4G17690 | UM   |
| AT4G17695 | UM   | UM   | UM   | UM   | UM   | UM   | mCHH | UM   |
| AT4G17700 | UM   |
| AT4G17710 | UM   | UM   | UM   | UM   | UM   | UM   | mCHH | UM   |
| AT4G17713 | UM   |
| AT4G17718 | UM   |
| AT4G17720 | UM   | UM   | UM   | UM   | UM   | UM   | mCHH | UM   |
| AT4G17730 | UM   |
| AT4G17740 | UM   | UM   | UM   | UM   | UM   | UM   | mCHG | UM   |
| AT4G17750 | UM   |
| AT4G17760 | UM   |
| AT4G17770 | gbM  | gbM  | gbM  | gbM  | gbM  | gbM  | mCHH | UM   |
| AT4G17780 | UM   |
| AT4G17785 | UM   |
| AT4G17790 | UM   |
| AT4G17800 | UM   |
| AT4G17810 | UM   |
| AT4G17830 | UM   | UM   | UM   | UM   | UM   | UM   | mCHH | UM   |
| AT4G17840 | UM   |
| AT4G17850 | UM   | UM   | UM   | UM   | UM   | UM   | mCHH | UM   |
| AT4G17860 | UM   |
| AT4G17870 | UM   |
| AT4G17880 | UM   | UM   | UM   | UM   | UM   | UM   | mCHH | UM   |
| AT4G17890 | UM   |
| AT4G17895 | UM   | UM   | UM   | UM   | UM   | UM   | mCHH | UM   |
| AT4G17900 | UM   |
| AT4G17905 | UM   | UM   | UM   | UM   | UM   | UM   | mCHH | UM   |
| AT4G17910 | UM   | mCHH | gbM  | UM   | UM   | UM   | mCHH | gbM  |
| AT4G17920 | UM   | UM   | UM   | UM   | UM   | UM   | mCHH | UM   |
| AT4G17930 | UM   |
| AT4G17940 | UM   |
| AT4G17950 | UM   |
| AT4G17960 | UM   |
| AT4G17970 | UM   | UM   | UM   | UM   | UM   | UM   | mCHH | UM   |
| AT4G17980 | UM   | UM   | UM   | UM   | UM   | UM   | mCHH | UM   |
| AT4G17990 | UM   |

|           |      |      |      |      |      |      |      |      |
|-----------|------|------|------|------|------|------|------|------|
| AT4G17998 | UM   | UM   | mCHH | UM   | UM   | UM   | mCHH | UM   |
| AT4G18000 | mCHH | mCHH | mCHH | UM   | mCHH | UM   | mCHH | UM   |
| AT4G18010 | UM   |
| AT4G18020 | UM   | UM   | UM   | UM   | UM   | UM   | mCHH | UM   |
| AT4G18030 | gbM  | gbM  | gbM  | gbM  | gbM  | gbM  | mCHH | gbM  |
| AT4G18040 | UM   | UM   | UM   | UM   | UM   | UM   | mCHH | UM   |
| AT4G18050 | UM   | UM   | UM   | UM   | UM   | UM   | mCHH | UM   |
| AT4G18060 | UM   | UM   | UM   | UM   | UM   | UM   | gbM  | UM   |
| AT4G18070 | UM   |
| AT4G18080 | UM   |
| AT4G18090 | UM   |
| AT4G18100 | UM   |
| AT4G18110 | mCHH |
| AT4G18120 | gbM  | gbM  | gbM  | gbM  | gbM  | gbM  | mCHH | gbM  |
| AT4G18130 | gbM  | gbM  | gbM  | gbM  | gbM  | gbM  | mCHH | gbM  |
| AT4G18140 | UM   | mCHH | UM   | UM   | UM   | UM   | UM   | UM   |
| AT4G18150 | mCHH |
| AT4G18160 | UM   | UM   | UM   | UM   | UM   | UM   | mCHH | UM   |
| AT4G18170 | UM   | UM   | UM   | UM   | UM   | UM   | mCHH | UM   |
| AT4G18180 | UM   | UM   | UM   | UM   | UM   | UM   | mCHH | UM   |
| AT4G18190 | UM   | UM   | UM   | UM   | UM   | UM   | mCHH | UM   |
| AT4G18195 | UM   | UM   | UM   | UM   | UM   | UM   | mCHH | UM   |
| AT4G18197 | UM   |
| AT4G18205 | UM   |
| AT4G18210 | UM   | UM   | UM   | UM   | UM   | UM   | mCHH | UM   |
| AT4G18220 | UM   |
| AT4G18230 | UM   | UM   | UM   | UM   | UM   | UM   | mCHH | UM   |
| AT4G18240 | gbM  | gbM  | gbM  | gbM  | gbM  | gbM  | mCHH | gbM  |
| AT4G18250 | UM   | UM   | UM   | UM   | UM   | UM   | mCHH | UM   |
| AT4G18260 | UM   | UM   | UM   | UM   | UM   | UM   | mCHH | UM   |
| AT4G18270 | UM   | UM   | UM   | UM   | UM   | UM   | mCHH | UM   |
| AT4G18280 | UM   |
| AT4G18282 | UM   |
| AT4G18290 | UM   | mCHH | UM   | UM   | UM   | UM   | mCHH | UM   |
| AT4G18300 | UM   | gbM  | UM   | UM   | UM   | UM   | mCHH | UM   |
| AT4G18310 | UM   |
| AT4G18320 | UM   |
| AT4G18330 | UM   | UM   | UM   | UM   | UM   | UM   | mCHH | UM   |
| AT4G18335 | UM   |
| AT4G18340 | UM   |
| AT4G18350 | UM   |
| AT4G18360 | UM   |
| AT4G18370 | UM   | UM   | UM   | UM   | UM   | UM   | mCHH | UM   |
| AT4G18372 | UM   |
| AT4G18375 | gbM  | mCHH | gbM  | gbM  | gbM  | UM   | mCHH | UM   |
| AT4G18380 | UM   |
| AT4G18390 | UM   |
| AT4G18395 | UM   |





|           |      |      |     |     |     |     |      |     |
|-----------|------|------|-----|-----|-----|-----|------|-----|
| AT4G18830 | UM   | mCHH | UM  | UM  | UM  | UM  | mCHH | UM  |
| AT4G18840 | UM   | UM   | UM  | UM  | UM  | UM  | mCHH | UM  |
| AT4G18850 | UM   | UM   | UM  | UM  | UM  | UM  | UM   | UM  |
| AT4G18860 | UM   | UM   | UM  | UM  | UM  | UM  | UM   | UM  |
| AT4G18870 | UM   | UM   | UM  | UM  | UM  | UM  | mCHH | UM  |
| AT4G18880 | UM   | UM   | UM  | UM  | UM  | UM  | mCHH | UM  |
| AT4G18890 | UM   | UM   | UM  | UM  | UM  | UM  | UM   | UM  |
| AT4G18900 | UM   | UM   | UM  | UM  | UM  | UM  | mCHH | UM  |
| AT4G18905 | gbM  | gbM  | gbM | UM  | UM  | UM  | mCHH | UM  |
| AT4G18910 | UM   | UM   | UM  | UM  | UM  | UM  | UM   | UM  |
| AT4G18920 | UM   | UM   | UM  | UM  | UM  | UM  | UM   | UM  |
| AT4G18930 | UM   | UM   | UM  | UM  | UM  | UM  | UM   | UM  |
| AT4G18940 | UM   | UM   | UM  | UM  | UM  | UM  | UM   | UM  |
| AT4G18950 | UM   | UM   | UM  | UM  | UM  | UM  | mCHH | UM  |
| AT4G18960 | UM   | UM   | UM  | UM  | UM  | UM  | mCHH | UM  |
| AT4G18970 | UM   | UM   | UM  | UM  | UM  | UM  | UM   | UM  |
| AT4G18975 | gbM  | gbM  | gbM | UM  | gbM | UM  | mCHH | gbM |
| AT4G18980 | UM   | UM   | UM  | UM  | UM  | UM  | UM   | UM  |
| AT4G18990 | UM   | UM   | UM  | UM  | UM  | UM  | mCHH | UM  |
| AT4G19000 | gbM  | mCHH | gbM | UM  | UM  | UM  | mCHH | UM  |
| AT4G19003 | UM   | UM   | UM  | UM  | UM  | UM  | mCHH | UM  |
| AT4G19006 | UM   | UM   | UM  | UM  | UM  | UM  | mCHH | UM  |
| AT4G19010 | UM   | UM   | UM  | UM  | UM  | UM  | mCHH | UM  |
| AT4G19020 | UM   | gbM  | UM  | UM  | UM  | UM  | mCHH | UM  |
| AT4G19030 | UM   | UM   | UM  | UM  | UM  | UM  | mCHH | UM  |
| AT4G19035 | UM   | UM   | UM  | UM  | UM  | UM  | UM   | UM  |
| AT4G19038 | UM   | UM   | UM  | UM  | UM  | UM  | UM   | UM  |
| AT4G19040 | gbM  | gbM  | gbM | gbM | gbM | gbM | mCHH | gbM |
| AT4G19045 | UM   | UM   | UM  | UM  | UM  | UM  | UM   | UM  |
| AT4G19050 | gbM  | gbM  | gbM | gbM | UM  | UM  | mCHH | gbM |
| AT4G19060 | gbM  | mCHH | gbM | gbM | gbM | gbM | mCHH | gbM |
| AT4G19070 | UM   | UM   | UM  | UM  | UM  | UM  | mCHH | UM  |
| AT4G19080 | gbM  | gbM  | gbM | gbM | gbM | gbM | gbM  | UM  |
| AT4G19090 | gbM  | gbM  | gbM | gbM | gbM | gbM | mCHH | gbM |
| AT4G19095 | UM   | UM   | UM  | UM  | UM  | UM  | UM   | UM  |
| AT4G19100 | UM   | UM   | UM  | UM  | UM  | UM  | UM   | UM  |
| AT4G19110 | gbM  | gbM  | gbM | gbM | gbM | gbM | mCHH | gbM |
| AT4G19112 | UM   | UM   | UM  | UM  | UM  | UM  | UM   | UM  |
| AT4G19120 | UM   | UM   | UM  | UM  | UM  | UM  | mCHH | UM  |
| AT4G19130 | UM   | UM   | UM  | UM  | UM  | UM  | mCHH | UM  |
| AT4G19140 | UM   | UM   | UM  | UM  | UM  | UM  | UM   | UM  |
| AT4G19150 | UM   | UM   | UM  | UM  | UM  | UM  | UM   | UM  |
| AT4G19160 | UM   | UM   | UM  | UM  | UM  | UM  | mCHH | UM  |
| AT4G19170 | UM   | UM   | UM  | UM  | UM  | UM  | UM   | UM  |
| AT4G19180 | gbM  | gbM  | gbM | UM  | gbM | gbM | mCHH | UM  |
| AT4G19185 | UM   | UM   | UM  | UM  | UM  | UM  | mCHH | UM  |
| AT4G19190 | mCHH | mCHH | gbM | gbM | UM  | gbM | mCHH | UM  |
| AT4G19191 | UM   | UM   | UM  | UM  | UM  | UM  | mCHH | UM  |

|           |      |      |      |      |      |      |      |      |
|-----------|------|------|------|------|------|------|------|------|
| AT4G19200 | UM   |
| AT4G19210 | gbM  | gbM  | gbM  | gbM  | gbM  | gbM  | mCHH | gbM  |
| AT4G19220 | UM   | UM   | UM   | UM   | UM   | UM   | mCHH | UM   |
| AT4G19230 | UM   | UM   | UM   | UM   | UM   | UM   | mCHH | UM   |
| AT4G19240 | mCHH |
| AT4G19250 | UM   |
| AT4G19260 | mCHH | mCHH | UM   | UM   | UM   | UM   | mCHH | UM   |
| AT4G19270 | mCHH | mCHH | mCHH | UM   | gbM  | mCHG | mCHH | gbM  |
| AT4G19330 | UM   |
| AT4G19340 | UM   |
| AT4G19350 | UM   |
| AT4G19360 | UM   |
| AT4G19370 | UM   | UM   | UM   | UM   | UM   | UM   | mCHH | UM   |
| AT4G19380 | UM   | UM   | UM   | UM   | UM   | UM   | mCHH | UM   |
| AT4G19390 | UM   |
| AT4G19400 | UM   |
| AT4G19410 | UM   | UM   | UM   | UM   | UM   | UM   | mCHH | UM   |
| AT4G19420 | UM   | UM   | UM   | UM   | UM   | UM   | mCHH | UM   |
| AT4G19430 | UM   |
| AT4G19440 | UM   | UM   | UM   | UM   | UM   | UM   | mCHH | UM   |
| AT4G19450 | UM   | UM   | UM   | UM   | UM   | UM   | mCHH | UM   |
| AT4G19460 | UM   | UM   | UM   | UM   | UM   | UM   | mCHH | UM   |
| AT4G19470 | UM   | UM   | UM   | UM   | UM   | UM   | mCHH | UM   |
| AT4G19480 | UM   |
| AT4G19490 | gbM  | gbM  | gbM  | gbM  | gbM  | gbM  | mCHH | gbM  |
| AT4G19500 | gbM  | mCHH | gbM  | UM   | UM   | UM   | mCHH | UM   |
| AT4G19510 | UM   | UM   | UM   | UM   | UM   | UM   | mCHH | UM   |
| AT4G19520 | UM   | UM   | UM   | UM   | UM   | UM   | mCHH | UM   |
| AT4G19530 | UM   | UM   | UM   | UM   | UM   | UM   | mCHH | UM   |
| AT4G19540 | UM   |
| AT4G19550 | UM   | UM   | UM   | UM   | UM   | UM   | mCHH | UM   |
| AT4G19560 | UM   | UM   | UM   | UM   | UM   | UM   | mCHH | UM   |
| AT4G19570 | UM   | UM   | UM   | UM   | UM   | UM   | mCHH | UM   |
| AT4G19580 | mCHH | mCHG | gbM  | UM   | gbM  | UM   | mCHH | mCHG |
| AT4G19590 | UM   | gbM  | UM   | UM   | UM   | UM   | mCHG | UM   |
| AT4G19600 | gbM  | gbM  | gbM  | gbM  | gbM  | gbM  | mCHH | gbM  |
| AT4G19610 | gbM  | gbM  | gbM  | gbM  | gbM  | gbM  | mCHH | gbM  |
| AT4G19620 | UM   |
| AT4G19630 | UM   |
| AT4G19640 | UM   | UM   | UM   | UM   | UM   | UM   | mCHH | UM   |
| AT4G19645 | UM   | UM   | UM   | UM   | UM   | UM   | mCHH | UM   |
| AT4G19650 | UM   | UM   | UM   | UM   | UM   | UM   | mCHH | UM   |
| AT4G19660 | gbM  | gbM  | gbM  | gbM  | gbM  | gbM  | mCHH | gbM  |
| AT4G19670 | gbM  |
| AT4G19680 | UM   | UM   | UM   | UM   | UM   | UM   | mCHH | UM   |
| AT4G19690 | UM   |
| AT4G19700 | UM   |
| AT4G19710 | UM   | UM   | UM   | UM   | UM   | UM   | mCHH | UM   |

|           |     |     |     |     |     |     |      |     |
|-----------|-----|-----|-----|-----|-----|-----|------|-----|
| AT4G19720 | UM  | UM  | UM  | UM  | UM  | UM  | mCHH | UM  |
| AT4G19730 | UM   | UM  |
| AT4G19740 | UM   | UM  |
| AT4G19750 | UM   | UM  |
| AT4G19760 | UM   | UM  |
| AT4G19770 | UM   | UM  |
| AT4G19800 | UM   | UM  |
| AT4G19810 | UM   | UM  |
| AT4G19820 | UM   | UM  |
| AT4G19829 | UM   | UM  |
| AT4G19830 | UM  | UM  | UM  | UM  | UM  | UM  | mCHH | UM  |
| AT4G19840 | UM   | UM  |
| AT4G19850 | UM  | UM  | UM  | UM  | UM  | UM  | mCHH | UM  |
| AT4G19860 | gbM | gbM | gbM | gbM | gbM | gbM | mCHH | UM  |
| AT4G19865 | UM   | UM  |
| AT4G19870 | UM   | UM  |
| AT4G19880 | UM   | UM  |
| AT4G19890 | UM  | UM  | UM  | UM  | UM  | UM  | mCHH | UM  |
| AT4G19900 | UM  | UM  | UM  | UM  | UM  | UM  | mCHH | UM  |
| AT4G19905 | UM   | UM  |
| AT4G19910 | UM   | UM  |
| AT4G19920 | UM   | UM  |
| AT4G19925 | UM  | UM  | UM  | UM  | UM  | UM  | mCHH | UM  |
| AT4G19930 | UM   | UM  |
| AT4G19940 | UM   | UM  |
| AT4G19950 | UM   | UM  |
| AT4G19960 | UM  | gbM | UM  | UM  | UM  | UM  | mCHH | UM  |
| AT4G19970 | UM  | UM  | UM  | UM  | UM  | UM  | mCHH | UM  |
| AT4G19980 | UM   | UM  |
| AT4G19985 | UM   | UM  |
| AT4G19990 | gbM | gbM | gbM | gbM | gbM | gbM | mCHH | gbM |
| AT4G20000 | UM   | UM  |
| AT4G20006 | UM   | UM  |
| AT4G20010 | UM  | UM  | UM  | UM  | UM  | UM  | mCHH | UM  |
| AT4G20020 | UM   | UM  |
| AT4G20030 | UM   | UM  |
| AT4G20040 | gbM | gbM | gbM | UM  | UM  | UM  | mCHH | UM  |
| AT4G20050 | UM   | UM  |
| AT4G20060 | gbM | gbM | gbM | gbM | gbM | gbM | mCHH | gbM |
| AT4G20070 | UM   | UM  |
| AT4G20080 | UM  | UM  | UM  | UM  | UM  | UM  | mCHH | UM  |
| AT4G20090 | gbM | gbM | gbM | gbM | UM  | UM  | mCHH | UM  |
| AT4G20095 | UM  | UM  | UM  | UM  | UM  | UM  | mCHH | UM  |
| AT4G20100 | gbM | gbM | gbM | UM  | UM  | UM  | mCHH | UM  |
| AT4G20110 | UM  | UM  | UM  | UM  | UM  | UM  | mCHH | UM  |
| AT4G20130 | gbM | gbM | gbM | gbM | gbM | gbM | mCHH | gbM |
| AT4G20140 | UM  | UM  | UM  | UM  | UM  | UM  | mCHH | UM  |
| AT4G20150 | UM   | UM  |



|           |      |      |      |      |      |      |      |      |
|-----------|------|------|------|------|------|------|------|------|
| AT4G20670 | mCHH |
| AT4G20680 | UM   |
| AT4G20690 | mCHG | UM   | mCHH | UM   | UM   | UM   | mCHG | UM   |
| AT4G20700 | mCHH | mCHH | mCHH | UM   | UM   | UM   | mCHH | UM   |
| AT4G20720 | UM   |
| AT4G20740 | UM   |
| AT4G20760 | UM   |
| AT4G20770 | gbM  | gbM  | gbM  | UM   | UM   | UM   | gbM  | UM   |
| AT4G20780 | UM   |
| AT4G20790 | UM   |
| AT4G20800 | UM   | UM   | UM   | UM   | UM   | UM   | mCHH | UM   |
| AT4G20810 | UM   | UM   | UM   | UM   | UM   | UM   | mCHH | UM   |
| AT4G20820 | UM   |
| AT4G20830 | UM   |
| AT4G20840 | UM   |
| AT4G20850 | gbM  | mCHH | gbM  | gbM  | UM   | UM   | mCHH | gbM  |
| AT4G20860 | UM   | UM   | UM   | UM   | UM   | UM   | mCHH | UM   |
| AT4G20870 | UM   | UM   | UM   | UM   | UM   | UM   | mCHH | UM   |
| AT4G20880 | UM   | UM   | UM   | UM   | UM   | UM   | mCHH | UM   |
| AT4G20890 | UM   |
| AT4G20900 | UM   | UM   | UM   | UM   | UM   | UM   | mCHH | UM   |
| AT4G20910 | gbM  | gbM  | gbM  | gbM  | gbM  | gbM  | mCHH | gbM  |
| AT4G20920 | UM   | UM   | UM   | UM   | UM   | UM   | mCHH | UM   |
| AT4G20930 | UM   |
| AT4G20940 | gbM  | gbM  | gbM  | gbM  | gbM  | gbM  | mCHH | gbM  |
| AT4G20960 | UM   | UM   | UM   | UM   | UM   | UM   | gbM  | UM   |
| AT4G20970 | UM   |
| AT4G20980 | UM   |
| AT4G20990 | UM   | UM   | UM   | UM   | UM   | UM   | mCHH | UM   |
| AT4G21000 | UM   | UM   | UM   | UM   | UM   | UM   | mCHH | UM   |
| AT4G21010 | UM   | UM   | UM   | UM   | UM   | UM   | mCHH | UM   |
| AT4G21020 | mCHH | UM   | UM   | UM   | UM   | UM   | mCHH | UM   |
| AT4G21030 | mCHH |
| AT4G21040 | UM   | mCHH | UM   | UM   | UM   | UM   | mCHH | UM   |
| AT4G21050 | UM   | UM   | UM   | UM   | UM   | UM   | mCHH | UM   |
| AT4G21060 | UM   | mCHH | UM   | UM   | UM   | UM   | mCHH | UM   |
| AT4G21065 | UM   | UM   | UM   | UM   | UM   | UM   | mCHH | UM   |
| AT4G21070 | UM   | mCHH | UM   | UM   | UM   | UM   | mCHH | UM   |
| AT4G21080 | UM   |
| AT4G21090 | UM   | UM   | UM   | UM   | UM   | UM   | mCHH | UM   |
| AT4G21100 | gbM  | mCHH | gbM  | gbM  | gbM  | gbM  | mCHH | gbM  |
| AT4G21105 | UM   |
| AT4G21110 | UM   |
| AT4G21120 | UM   | UM   | UM   | UM   | UM   | UM   | mCHH | UM   |
| AT4G21130 | UM   | UM   | UM   | UM   | UM   | UM   | mCHH | UM   |
| AT4G21140 | UM   |
| AT4G21150 | UM   | mCHH | UM   | UM   | UM   | UM   | mCHH | UM   |
| AT4G21160 | UM   | UM   | UM   | UM   | UM   | UM   | mCHH | UM   |

|           |      |      |      |     |     |     |      |     |
|-----------|------|------|------|-----|-----|-----|------|-----|
| AT4G21170 | UM   | UM   | UM   | UM  | UM  | UM  | mCHH | UM  |
| AT4G21180 | UM   | gbM  | gbM  | UM  | gbM | UM  | mCHH | UM  |
| AT4G21190 | UM   | UM   | UM   | UM  | UM  | UM  | mCHH | UM  |
| AT4G21192 | UM   | UM   | UM   | UM  | UM  | UM  | UM   | UM  |
| AT4G21200 | UM   | UM   | UM   | UM  | UM  | UM  | UM   | UM  |
| AT4G21210 | UM   | UM   | UM   | UM  | UM  | UM  | UM   | UM  |
| AT4G21213 | UM   | UM   | UM   | UM  | UM  | UM  | UM   | UM  |
| AT4G21215 | UM   | UM   | UM   | UM  | UM  | UM  | UM   | UM  |
| AT4G21216 | UM   | UM   | UM   | UM  | UM  | UM  | UM   | UM  |
| AT4G21220 | UM   | UM   | UM   | UM  | UM  | UM  | UM   | UM  |
| AT4G21230 | UM   | UM   | UM   | UM  | UM  | UM  | mCHH | UM  |
| AT4G21240 | UM   | UM   | UM   | UM  | UM  | UM  | mCHH | UM  |
| AT4G21250 | UM   | UM   | UM   | UM  | UM  | UM  | mCHH | UM  |
| AT4G21260 | UM   | UM   | UM   | UM  | UM  | UM  | mCHH | UM  |
| AT4G21270 | gbM  | gbM  | gbM  | gbM | gbM | gbM | mCHH | UM  |
| AT4G21280 | UM   | UM   | UM   | UM  | UM  | UM  | UM   | UM  |
| AT4G21300 | gbM  | gbM  | gbM  | gbM | gbM | gbM | mCHH | gbM |
| AT4G21310 | UM   | UM   | UM   | UM  | UM  | UM  | UM   | UM  |
| AT4G21320 | UM   | UM   | UM   | UM  | UM  | UM  | UM   | UM  |
| AT4G21323 | UM   | UM   | UM   | UM  | UM  | UM  | mCHH | UM  |
| AT4G21326 | gbM  | gbM  | gbM  | gbM | gbM | gbM | mCHH | gbM |
| AT4G21330 | UM   | UM   | UM   | UM  | UM  | UM  | UM   | UM  |
| AT4G21340 | UM   | UM   | UM   | UM  | UM  | UM  | mCHH | UM  |
| AT4G21350 | UM   | UM   | UM   | UM  | UM  | UM  | UM   | UM  |
| AT4G21366 | UM   | UM   | UM   | UM  | UM  | UM  | UM   | UM  |
| AT4G21380 | UM   | UM   | UM   | UM  | UM  | UM  | mCHH | UM  |
| AT4G21390 | UM   | UM   | UM   | UM  | UM  | UM  | mCHH | UM  |
| AT4G21400 | gbM  | mCHH | gbM  | gbM | gbM | gbM | mCHH | gbM |
| AT4G21410 | gbM  | gbM  | gbM  | gbM | gbM | gbM | mCHH | gbM |
| AT4G21430 | UM   | UM   | UM   | UM  | UM  | UM  | mCHH | UM  |
| AT4G21440 | UM   | UM   | UM   | UM  | UM  | UM  | mCHH | UM  |
| AT4G21445 | UM   | UM   | UM   | UM  | UM  | UM  | UM   | UM  |
| AT4G21450 | UM   | UM   | UM   | UM  | UM  | UM  | mCHH | UM  |
| AT4G21460 | UM   | UM   | UM   | UM  | UM  | UM  | mCHH | UM  |
| AT4G21470 | UM   | UM   | UM   | UM  | UM  | UM  | UM   | UM  |
| AT4G21480 | UM   | UM   | UM   | UM  | UM  | UM  | UM   | UM  |
| AT4G21490 | UM   | UM   | UM   | UM  | UM  | UM  | mCHH | UM  |
| AT4G21500 | UM   | UM   | UM   | UM  | UM  | UM  | mCHH | UM  |
| AT4G21510 | UM   | UM   | UM   | UM  | UM  | UM  | UM   | UM  |
| AT4G21520 | mCHH | mCHH | mCHH | UM  | gbM | UM  | mCHH | gbM |
| AT4G21530 | gbM  | gbM  | gbM  | gbM | UM  | gbM | mCHH | gbM |
| AT4G21534 | UM   | UM   | UM   | UM  | UM  | UM  | mCHH | UM  |
| AT4G21540 | UM   | UM   | UM   | UM  | UM  | UM  | mCHH | UM  |
| AT4G21550 | gbM  | gbM  | gbM  | UM  | UM  | gbM | mCHH | gbM |
| AT4G21560 | UM   | UM   | UM   | UM  | UM  | UM  | UM   | UM  |
| AT4G21570 | UM   | UM   | UM   | UM  | UM  | UM  | mCHH | UM  |
| AT4G21580 | UM   | UM   | UM   | UM  | UM  | UM  | mCHH | UM  |
| AT4G21585 | UM   | UM   | UM   | UM  | UM  | UM  | mCHH | UM  |

|           |      |      |      |      |     |     |      |      |
|-----------|------|------|------|------|-----|-----|------|------|
| AT4G21590 | UM   | UM   | UM   | UM   | UM  | UM  | mCHH | UM   |
| AT4G21600 | UM   | UM   | UM   | UM   | UM  | UM  | UM   | UM   |
| AT4G21610 | UM   | UM   | UM   | UM   | UM  | UM  | UM   | UM   |
| AT4G21620 | UM   | UM   | UM   | UM   | UM  | UM  | UM   | UM   |
| AT4G21630 | gbM  | UM   | UM   | gbM  | UM  | UM  | mCHH | UM   |
| AT4G21640 | mCHH | mCHH | mCHH | mCHG | UM  | UM  | mCHH | mCHG |
| AT4G21650 | UM   | UM   | UM   | UM   | UM  | UM  | mCHH | UM   |
| AT4G21660 | mCHH | mCHH | UM   | UM   | UM  | UM  | mCHH | UM   |
| AT4G21670 | gbM  | gbM  | gbM  | gbM  | gbM | gbM | mCHH | gbM  |
| AT4G21680 | UM   | UM   | UM   | UM   | UM  | UM  | mCHH | UM   |
| AT4G21690 | UM   | UM   | UM   | UM   | UM  | UM  | UM   | UM   |
| AT4G21700 | gbM  | gbM  | gbM  | UM   | gbM | gbM | mCHH | UM   |
| AT4G21705 | UM   | UM   | UM   | UM   | UM  | UM  | mCHH | UM   |
| AT4G21710 | gbM  | mCHH | gbM  | gbM  | gbM | gbM | mCHH | gbM  |
| AT4G21720 | UM   | UM   | UM   | UM   | UM  | UM  | mCHH | UM   |
| AT4G21740 | UM   | UM   | UM   | UM   | UM  | UM  | UM   | UM   |
| AT4G21745 | UM   | UM   | UM   | UM   | UM  | UM  | mCHH | UM   |
| AT4G21750 | UM   | UM   | UM   | UM   | UM  | UM  | mCHH | UM   |
| AT4G21760 | mCHH | UM   | UM   | UM   | UM  | UM  | mCHH | UM   |
| AT4G21770 | UM   | UM   | UM   | UM   | UM  | UM  | UM   | UM   |
| AT4G21780 | UM   | UM   | UM   | UM   | UM  | UM  | UM   | UM   |
| AT4G21790 | UM   | UM   | UM   | UM   | UM  | UM  | mCHH | UM   |
| AT4G21800 | UM   | gbM  | UM   | UM   | UM  | UM  | mCHH | UM   |
| AT4G21810 | UM   | UM   | UM   | UM   | UM  | UM  | mCHH | UM   |
| AT4G21820 | UM   | mCHH | UM   | UM   | UM  | UM  | mCHH | UM   |
| AT4G21830 | UM   | UM   | UM   | UM   | UM  | UM  | UM   | UM   |
| AT4G21840 | UM   | UM   | UM   | UM   | UM  | UM  | UM   | UM   |
| AT4G21850 | UM   | UM   | UM   | UM   | UM  | UM  | UM   | UM   |
| AT4G21860 | UM   | UM   | UM   | UM   | UM  | UM  | mCHH | UM   |
| AT4G21865 | UM   | UM   | UM   | UM   | UM  | UM  | UM   | UM   |
| AT4G21870 | UM   | UM   | UM   | UM   | UM  | UM  | mCHH | UM   |
| AT4G21880 | gbM  | mCHH | gbM  | UM   | UM  | UM  | mCHH | UM   |
| AT4G21890 | UM   | UM   | UM   | UM   | UM  | UM  | UM   | UM   |
| AT4G21895 | UM   | UM   | UM   | UM   | UM  | UM  | UM   | UM   |
| AT4G21900 | gbM  | gbM  | gbM  | gbM  | gbM | gbM | mCHH | gbM  |
| AT4G21902 | UM   | UM   | UM   | UM   | UM  | UM  | UM   | UM   |
| AT4G21903 | UM   | UM   | UM   | UM   | UM  | UM  | UM   | UM   |
| AT4G21910 | UM   | UM   | UM   | UM   | UM  | UM  | mCHH | UM   |
| AT4G21920 | UM   | UM   | UM   | UM   | UM  | UM  | UM   | UM   |
| AT4G21926 | UM   | UM   | UM   | UM   | UM  | UM  | UM   | UM   |
| AT4G21930 | UM   | UM   | UM   | UM   | UM  | UM  | UM   | UM   |
| AT4G21940 | UM   | UM   | UM   | UM   | UM  | UM  | mCHH | UM   |
| AT4G21950 | UM   | UM   | UM   | UM   | UM  | UM  | UM   | UM   |
| AT4G21960 | UM   | UM   | UM   | UM   | UM  | UM  | UM   | UM   |
| AT4G21970 | UM   | UM   | UM   | UM   | UM  | UM  | UM   | UM   |
| AT4G21980 | UM   | UM   | UM   | UM   | UM  | UM  | UM   | UM   |
| AT4G21990 | UM   | UM   | UM   | UM   | UM  | UM  | mCHH | UM   |
| AT4G22000 | UM   | UM   | UM   | UM   | UM  | UM  | mCHH | UM   |

|           |      |      |      |     |     |     |      |      |
|-----------|------|------|------|-----|-----|-----|------|------|
| AT4G22010 | UM   | UM   | UM   | UM  | UM  | UM  | mCHH | UM   |
| AT4G22030 | UM   | UM   | UM   | UM  | UM  | UM  | UM   | UM   |
| AT4G22050 | mCHH | mCHH | mCHH | UM  | UM  | UM  | mCHH | mCHH |
| AT4G22060 | UM   | UM   | UM   | UM  | UM  | UM  | mCHH | UM   |
| AT4G22070 | UM   | UM   | UM   | UM  | UM  | UM  | mCHH | UM   |
| AT4G22080 | UM   | UM   | UM   | UM  | UM  | UM  | UM   | UM   |
| AT4G22090 | UM   | UM   | UM   | UM  | UM  | UM  | UM   | UM   |
| AT4G22100 | UM   | UM   | UM   | UM  | UM  | UM  | mCHH | UM   |
| AT4G22105 | UM   | UM   | UM   | UM  | UM  | UM  | UM   | UM   |
| AT4G22110 | UM   | UM   | UM   | UM  | UM  | UM  | mCHH | UM   |
| AT4G22115 | UM   | UM   | UM   | UM  | UM  | UM  | UM   | UM   |
| AT4G22120 | mCHH | gbM  | gbM  | gbM | gbM | gbM | mCHH | gbM  |
| AT4G22130 | gbM  | gbM  | gbM  | gbM | gbM | gbM | mCHH | gbM  |
| AT4G22140 | gbM  | gbM  | gbM  | gbM | gbM | gbM | mCHH | gbM  |
| AT4G22150 | UM   | UM   | UM   | UM  | UM  | UM  | UM   | UM   |
| AT4G22160 | UM   | UM   | UM   | UM  | UM  | UM  | UM   | UM   |
| AT4G22165 | UM   | UM   | UM   | UM  | UM  | UM  | mCHH | UM   |
| AT4G22170 | UM   | UM   | UM   | UM  | UM  | UM  | UM   | UM   |
| AT4G22180 | UM   | UM   | UM   | UM  | UM  | UM  | mCHH | UM   |
| AT4G22190 | UM   | UM   | UM   | UM  | UM  | UM  | UM   | UM   |
| AT4G22200 | UM   | UM   | UM   | UM  | UM  | UM  | mCHH | UM   |
| AT4G22210 | UM   | UM   | UM   | UM  | UM  | UM  | UM   | UM   |
| AT4G22212 | UM   | UM   | UM   | UM  | UM  | UM  | UM   | UM   |
| AT4G22214 | UM   | UM   | UM   | UM  | UM  | UM  | mCHH | UM   |
| AT4G22217 | UM   | UM   | UM   | UM  | UM  | UM  | UM   | UM   |
| AT4G22220 | UM   | UM   | UM   | UM  | UM  | UM  | UM   | UM   |
| AT4G22230 | UM   | UM   | UM   | UM  | UM  | UM  | UM   | UM   |
| AT4G22235 | UM   | UM   | UM   | UM  | UM  | UM  | UM   | UM   |
| AT4G22240 | UM   | UM   | UM   | UM  | UM  | UM  | UM   | UM   |
| AT4G22250 | UM   | UM   | UM   | UM  | UM  | UM  | UM   | UM   |
| AT4G22260 | UM   | UM   | UM   | UM  | UM  | UM  | mCHH | UM   |
| AT4G22270 | UM   | UM   | UM   | UM  | UM  | UM  | UM   | UM   |
| AT4G22280 | gbM  | gbM  | UM   | UM  | UM  | gbM | mCHH | UM   |
| AT4G22285 | gbM  | gbM  | gbM  | gbM | UM  | UM  | mCHH | gbM  |
| AT4G22290 | UM   | UM   | UM   | UM  | UM  | UM  | mCHH | UM   |
| AT4G22300 | UM   | UM   | UM   | UM  | UM  | UM  | UM   | UM   |
| AT4G22305 | UM   | UM   | UM   | UM  | UM  | UM  | UM   | UM   |
| AT4G22310 | UM   | UM   | UM   | UM  | UM  | UM  | UM   | UM   |
| AT4G22320 | UM   | UM   | UM   | UM  | UM  | UM  | UM   | UM   |
| AT4G22330 | UM   | UM   | UM   | UM  | UM  | UM  | UM   | UM   |
| AT4G22340 | UM   | UM   | UM   | UM  | UM  | UM  | mCHH | UM   |
| AT4G22350 | UM   | UM   | UM   | UM  | UM  | UM  | gbM  | UM   |
| AT4G22360 | UM   | UM   | UM   | UM  | UM  | UM  | UM   | UM   |
| AT4G22370 | UM   | UM   | UM   | UM  | UM  | UM  | UM   | UM   |
| AT4G22380 | UM   | UM   | UM   | UM  | UM  | UM  | UM   | UM   |
| AT4G22390 | UM   | UM   | UM   | UM  | UM  | UM  | mCHH | UM   |
| AT4G22400 | UM   | UM   | UM   | UM  | UM  | UM  | UM   | UM   |
| AT4G22410 | mCHH | mCHH | mCHH | UM  | UM  | UM  | mCHH | UM   |



|           |      |      |      |      |      |      |      |      |
|-----------|------|------|------|------|------|------|------|------|
| AT4G22420 | mCHH |
| AT4G22430 | UM   | mCHG | UM   | UM   | UM   | UM   | mCHH | UM   |
| AT4G22440 | mCHH | mCHH | mCHH | mCHH | UM   | UM   | mCHH | mCHG |
| AT4G22460 | UM   |
| AT4G22470 | UM   | UM   | UM   | UM   | UM   | UM   | mCHH | UM   |
| AT4G22485 | mCHH | mCHH | mCHH | mCHG | mCHG | mCHH | mCHH | mCHG |
| AT4G22490 | UM   |
| AT4G22505 | UM   |
| AT4G22510 | UM   |
| AT4G22513 | UM   |
| AT4G22517 | UM   |
| AT4G22520 | UM   |
| AT4G22530 | UM   | UM   | UM   | UM   | UM   | UM   | mCHH | UM   |
| AT4G22540 | UM   | UM   | UM   | UM   | UM   | UM   | mCHH | UM   |
| AT4G22550 | UM   |
| AT4G22560 | UM   |
| AT4G22570 | UM   |
| AT4G22580 | UM   |
| AT4G22590 | UM   | UM   | UM   | UM   | UM   | UM   | mCHH | UM   |
| AT4G22592 | UM   |
| AT4G22600 | UM   |
| AT4G22610 | UM   |
| AT4G22620 | UM   |
| AT4G22630 | UM   |
| AT4G22640 | UM   |
| AT4G22650 | UM   | mCHH | UM   | UM   | UM   | UM   | mCHH | UM   |
| AT4G22660 | UM   | UM   | UM   | UM   | UM   | UM   | mCHH | UM   |
| AT4G22666 | UM   |
| AT4G22670 | gbM  |
| AT4G22680 | UM   |
| AT4G22690 | UM   |
| AT4G22700 | UM   |
| AT4G22710 | UM   |
| AT4G22720 | gbM  | gbM  | gbM  | UM   | UM   | gbM  | mCHH | gbM  |
| AT4G22730 | UM   | UM   | UM   | UM   | UM   | UM   | mCHH | UM   |
| AT4G22740 | UM   | UM   | UM   | UM   | UM   | UM   | mCHH | UM   |
| AT4G22745 | UM   |
| AT4G22750 | UM   |
| AT4G22753 | UM   |
| AT4G22756 | UM   |
| AT4G22758 | UM   |
| AT4G22760 | gbM  | gbM  | gbM  | gbM  | gbM  | gbM  | mCHH | UM   |
| AT4G22770 | UM   |
| AT4G22780 | UM   |
| AT4G22790 | UM   |
| AT4G22800 | mCHH | mCHH | mCHH | UM   | UM   | UM   | mCHH | UM   |
| AT4G22810 | UM   |
| AT4G22820 | gbM  | gbM  | UM   | UM   | UM   | UM   | gbM  | UM   |

|           |      |      |      |     |     |     |      |     |
|-----------|------|------|------|-----|-----|-----|------|-----|
| AT4G22830 | UM   | UM   | UM   | UM  | UM  | UM  | UM   | UM  |
| AT4G22840 | UM   | UM   | UM   | UM  | UM  | UM  | mCHH | UM  |
| AT4G22850 | UM   | UM   | UM   | UM  | UM  | UM  | mCHH | UM  |
| AT4G22860 | UM   | UM   | UM   | UM  | UM  | UM  | mCHH | UM  |
| AT4G22870 | UM   | UM   | UM   | UM  | UM  | UM  | UM   | UM  |
| AT4G22880 | UM   | UM   | UM   | UM  | UM  | UM  | mCHH | UM  |
| AT4G22890 | UM   | mCHH | UM   | UM  | UM  | UM  | mCHH | UM  |
| AT4G22900 | UM   | UM   | UM   | UM  | UM  | UM  | UM   | UM  |
| AT4G22910 | UM   | UM   | UM   | UM  | UM  | UM  | mCHH | UM  |
| AT4G22920 | UM   | UM   | UM   | UM  | UM  | UM  | UM   | UM  |
| AT4G22930 | gbM  | gbM  | gbM  | gbM | gbM | gbM | mCHH | gbM |
| AT4G22940 | UM   | gbM  | UM   | UM  | UM  | UM  | mCHH | UM  |
| AT4G22950 | UM   | UM   | UM   | UM  | UM  | UM  | UM   | UM  |
| AT4G22960 | mCHH | UM   | UM   | UM  | UM  | UM  | mCHH | UM  |
| AT4G22970 | gbM  | gbM  | gbM  | gbM | gbM | gbM | mCHH | gbM |
| AT4G22980 | UM   | UM   | UM   | UM  | UM  | UM  | UM   | UM  |
| AT4G22990 | gbM  | UM   | gbM  | UM  | UM  | UM  | mCHH | UM  |
| AT4G23000 | UM   | mCHH | UM   | UM  | UM  | UM  | mCHH | UM  |
| AT4G23010 | UM   | UM   | UM   | UM  | UM  | UM  | mCHH | UM  |
| AT4G23020 | UM   | UM   | UM   | UM  | UM  | UM  | mCHH | UM  |
| AT4G23030 | UM   | UM   | UM   | UM  | UM  | UM  | UM   | UM  |
| AT4G23040 | gbM  | gbM  | gbM  | gbM | UM  | gbM | mCHH | gbM |
| AT4G23050 | UM   | UM   | UM   | UM  | UM  | UM  | UM   | UM  |
| AT4G23060 | UM   | UM   | UM   | UM  | UM  | UM  | mCHH | UM  |
| AT4G23070 | UM   | UM   | UM   | UM  | UM  | UM  | mCHH | UM  |
| AT4G23080 | UM   | UM   | UM   | UM  | UM  | UM  | mCHH | UM  |
| AT4G23090 | UM   | UM   | UM   | UM  | UM  | UM  | UM   | UM  |
| AT4G23100 | UM   | UM   | UM   | UM  | UM  | UM  | UM   | UM  |
| AT4G23103 | UM   | UM   | UM   | UM  | UM  | UM  | UM   | UM  |
| AT4G23110 | UM   | UM   | mCHG | UM  | UM  | UM  | UM   | UM  |
| AT4G23120 | mCHH | mCHH | mCHH | UM  | UM  | UM  | mCHH | UM  |
| AT4G23130 | UM   | UM   | UM   | UM  | UM  | UM  | mCHH | UM  |
| AT4G23140 | UM   | UM   | UM   | UM  | UM  | UM  | UM   | UM  |
| AT4G23150 | UM   | UM   | UM   | UM  | UM  | UM  | mCHH | UM  |
| AT4G23160 | UM   | UM   | UM   | UM  | UM  | UM  | mCHH | UM  |
| AT4G23170 | UM   | UM   | UM   | UM  | UM  | UM  | UM   | UM  |
| AT4G23180 | UM   | UM   | UM   | UM  | UM  | UM  | mCHH | UM  |
| AT4G23190 | UM   | UM   | UM   | UM  | UM  | UM  | mCHH | UM  |
| AT4G23200 | UM   | UM   | UM   | UM  | UM  | UM  | mCHH | UM  |
| AT4G23210 | UM   | UM   | UM   | UM  | UM  | UM  | UM   | UM  |
| AT4G23220 | UM   | UM   | UM   | UM  | UM  | UM  | mCHH | UM  |
| AT4G23230 | UM   | UM   | UM   | UM  | UM  | UM  | UM   | UM  |
| AT4G23240 | UM   | UM   | UM   | UM  | UM  | UM  | UM   | UM  |
| AT4G23250 | UM   | UM   | UM   | UM  | UM  | UM  | mCHH | UM  |
| AT4G23260 | UM   | UM   | UM   | UM  | UM  | UM  | mCHH | UM  |
| AT4G23270 | UM   | UM   | UM   | UM  | UM  | UM  | mCHH | UM  |
| AT4G23271 | UM   | UM   | UM   | UM  | UM  | UM  | UM   | UM  |
| AT4G23280 | UM   | UM   | UM   | UM  | UM  | UM  | UM   | UM  |

|           |      |      |      |      |      |      |      |      |
|-----------|------|------|------|------|------|------|------|------|
| AT4G23290 | UM   | UM   | UM   | UM   | UM   | UM   | mCHH | UM   |
| AT4G23300 | UM   | UM   | UM   | UM   | UM   | UM   | mCHH | UM   |
| AT4G23310 | UM   | UM   | UM   | UM   | UM   | UM   | mCHH | UM   |
| AT4G23320 | UM   |
| AT4G23330 | UM   | UM   | UM   | UM   | UM   | UM   | mCHH | UM   |
| AT4G23340 | UM   |
| AT4G23350 | UM   |
| AT4G23360 | UM   | UM   | UM   | UM   | UM   | UM   | mCHH | UM   |
| AT4G23370 | UM   | UM   | UM   | UM   | UM   | UM   | mCHH | UM   |
| AT4G23380 | UM   | UM   | UM   | UM   | UM   | UM   | mCHH | UM   |
| AT4G23390 | UM   | UM   | UM   | UM   | UM   | UM   | mCHH | UM   |
| AT4G23400 | UM   |
| AT4G23410 | UM   |
| AT4G23420 | gbM  | UM   | UM   | UM   | UM   | UM   | mCHH | UM   |
| AT4G23430 | gbM  | gbM  | gbM  | gbM  | UM   | UM   | gbM  | UM   |
| AT4G23432 | UM   |
| AT4G23440 | gbM  | gbM  | gbM  | gbM  | gbM  | gbM  | mCHH | gbM  |
| AT4G23450 | UM   | UM   | UM   | UM   | UM   | UM   | mCHH | UM   |
| AT4G23460 | gbM  | gbM  | gbM  | gbM  | gbM  | gbM  | mCHH | gbM  |
| AT4G23470 | UM   |
| AT4G23490 | UM   | UM   | UM   | UM   | UM   | UM   | mCHH | UM   |
| AT4G23493 | UM   |
| AT4G23496 | UM   |
| AT4G23500 | UM   |
| AT4G23510 | UM   | UM   | UM   | UM   | UM   | UM   | mCHH | UM   |
| AT4G23515 | UM   | UM   | UM   | UM   | UM   | UM   | mCHH | UM   |
| AT4G23520 | UM   |
| AT4G23530 | UM   |
| AT4G23540 | gbM  | mCHH | gbM  | gbM  | UM   | gbM  | mCHH | gbM  |
| AT4G23550 | UM   |
| AT4G23560 | mCHH |
| AT4G23570 | UM   |
| AT4G23580 | UM   |
| AT4G23590 | UM   |
| AT4G23600 | UM   | UM   | UM   | UM   | UM   | UM   | mCHH | UM   |
| AT4G23610 | UM   |
| AT4G23620 | UM   |
| AT4G23630 | UM   |
| AT4G23640 | gbM  | gbM  | gbM  | gbM  | gbM  | gbM  | mCHH | gbM  |
| AT4G23650 | UM   | UM   | UM   | UM   | UM   | UM   | mCHH | UM   |
| AT4G23660 | UM   | UM   | UM   | UM   | UM   | UM   | mCHH | UM   |
| AT4G23670 | UM   |
| AT4G23680 | UM   |
| AT4G23690 | UM   |
| AT4G23700 | UM   | UM   | UM   | UM   | UM   | UM   | mCHH | UM   |
| AT4G23710 | UM   |
| AT4G23720 | UM   |
| AT4G23730 | UM   | UM   | UM   | UM   | UM   | UM   | mCHH | UM   |

|           |      |      |     |     |     |     |      |     |
|-----------|------|------|-----|-----|-----|-----|------|-----|
| AT4G23740 | gbM  | gbM  | UM  | UM  | gbM | gbM | mCHH | UM  |
| AT4G23750 | UM   | UM   | UM  | UM  | UM  | UM  | UM   | UM  |
| AT4G23760 | UM   | UM   | UM  | UM  | UM  | UM  | UM   | UM  |
| AT4G23770 | UM   | UM   | UM  | UM  | UM  | UM  | mCHH | UM  |
| AT4G23780 | UM   | UM   | UM  | UM  | UM  | UM  | UM   | UM  |
| AT4G23790 | UM   | UM   | UM  | UM  | UM  | UM  | mCHH | UM  |
| AT4G23800 | UM   | UM   | UM  | UM  | UM  | UM  | mCHH | UM  |
| AT4G23810 | UM   | UM   | UM  | UM  | UM  | UM  | UM   | UM  |
| AT4G23820 | UM   | UM   | UM  | UM  | UM  | UM  | mCHH | UM  |
| AT4G23840 | UM   | UM   | UM  | UM  | UM  | UM  | UM   | UM  |
| AT4G23850 | UM   | UM   | UM  | gbM | UM  | UM  | mCHH | UM  |
| AT4G23860 | UM   | UM   | UM  | UM  | UM  | UM  | UM   | UM  |
| AT4G23870 | UM   | UM   | UM  | UM  | UM  | UM  | UM   | UM  |
| AT4G23880 | UM   | UM   | UM  | UM  | UM  | UM  | mCHH | UM  |
| AT4G23882 | UM   | UM   | UM  | UM  | UM  | UM  | mCHH | UM  |
| AT4G23885 | UM   | UM   | UM  | UM  | UM  | UM  | UM   | UM  |
| AT4G23890 | UM   | UM   | UM  | UM  | UM  | UM  | UM   | UM  |
| AT4G23895 | gbM  | gbM  | gbM | gbM | gbM | gbM | mCHH | gbM |
| AT4G23900 | UM   | UM   | UM  | UM  | UM  | UM  | UM   | UM  |
| AT4G23910 | UM   | UM   | UM  | UM  | UM  | UM  | UM   | UM  |
| AT4G23920 | UM   | UM   | UM  | UM  | UM  | UM  | mCHH | UM  |
| AT4G23930 | UM   | UM   | UM  | UM  | UM  | UM  | UM   | UM  |
| AT4G23940 | gbM  | gbM  | gbM | UM  | UM  | gbM | mCHH | UM  |
| AT4G23950 | UM   | UM   | UM  | UM  | UM  | UM  | mCHH | UM  |
| AT4G23960 | UM   | UM   | UM  | UM  | UM  | UM  | UM   | UM  |
| AT4G23970 | UM   | UM   | UM  | UM  | UM  | UM  | UM   | UM  |
| AT4G23980 | UM   | UM   | UM  | UM  | UM  | UM  | mCHH | UM  |
| AT4G23990 | UM   | UM   | UM  | UM  | UM  | UM  | UM   | UM  |
| AT4G24000 | UM   | UM   | UM  | UM  | UM  | UM  | mCHH | UM  |
| AT4G24010 | UM   | UM   | UM  | UM  | UM  | UM  | mCHH | UM  |
| AT4G24015 | UM   | UM   | UM  | UM  | UM  | UM  | UM   | UM  |
| AT4G24020 | UM   | UM   | UM  | UM  | UM  | UM  | mCHH | UM  |
| AT4G24026 | UM   | UM   | UM  | UM  | UM  | UM  | UM   | UM  |
| AT4G24030 | UM   | UM   | UM  | UM  | UM  | UM  | UM   | UM  |
| AT4G24040 | UM   | UM   | UM  | UM  | UM  | UM  | mCHH | UM  |
| AT4G24050 | UM   | UM   | UM  | UM  | UM  | UM  | UM   | UM  |
| AT4G24060 | UM   | UM   | UM  | UM  | UM  | UM  | UM   | UM  |
| AT4G24070 | UM   | UM   | UM  | UM  | UM  | UM  | UM   | UM  |
| AT4G24080 | UM   | UM   | UM  | UM  | UM  | UM  | UM   | UM  |
| AT4G24090 | UM   | UM   | UM  | UM  | UM  | UM  | UM   | UM  |
| AT4G24100 | UM   | UM   | UM  | UM  | UM  | UM  | mCHH | UM  |
| AT4G24110 | UM   | UM   | UM  | UM  | UM  | UM  | UM   | UM  |
| AT4G24120 | UM   | UM   | UM  | UM  | UM  | UM  | mCHH | UM  |
| AT4G24130 | UM   | UM   | UM  | UM  | UM  | UM  | UM   | UM  |
| AT4G24140 | UM   | UM   | UM  | UM  | UM  | UM  | mCHH | UM  |
| AT4G24150 | UM   | UM   | UM  | UM  | UM  | UM  | UM   | UM  |
| AT4G24160 | UM   | UM   | UM  | UM  | UM  | UM  | mCHH | UM  |
| AT4G24170 | mCHH | mCHH | UM  | UM  | UM  | UM  | mCHH | UM  |

|           |     |      |     |     |     |     |      |     |
|-----------|-----|------|-----|-----|-----|-----|------|-----|
| AT4G24175 | UM  | UM   | UM  | UM  | UM  | UM  | UM   | UM  |
| AT4G24180 | UM  | UM   | UM  | UM  | UM  | UM  | UM   | UM  |
| AT4G24190 | UM  | UM   | UM  | UM  | UM  | UM  | mCHH | UM  |
| AT4G24200 | gbM | gbM  | gbM | gbM | gbM | gbM | mCHH | gbM |
| AT4G24204 | UM  | UM   | UM  | UM  | UM  | UM  | UM   | UM  |
| AT4G24210 | UM  | UM   | UM  | UM  | UM  | UM  | UM   | UM  |
| AT4G24220 | UM  | UM   | UM  | UM  | UM  | UM  | UM   | UM  |
| AT4G24230 | UM  | UM   | UM  | UM  | UM  | UM  | UM   | UM  |
| AT4G24231 | UM  | UM   | UM  | UM  | UM  | UM  | UM   | UM  |
| AT4G24240 | UM  | UM   | UM  | UM  | UM  | UM  | UM   | UM  |
| AT4G24250 | UM  | UM   | UM  | UM  | UM  | UM  | mCHH | UM  |
| AT4G24260 | UM  | UM   | UM  | UM  | UM  | UM  | mCHH | UM  |
| AT4G24265 | UM  | UM   | UM  | UM  | UM  | UM  | UM   | UM  |
| AT4G24270 | UM  | UM   | UM  | UM  | UM  | UM  | mCHH | UM  |
| AT4G24275 | UM  | UM   | UM  | UM  | UM  | UM  | UM   | UM  |
| AT4G24280 | UM  | UM   | UM  | UM  | UM  | UM  | mCHH | UM  |
| AT4G24290 | UM  | UM   | UM  | UM  | UM  | UM  | mCHH | UM  |
| AT4G24300 | UM  | UM   | UM  | UM  | UM  | UM  | mCHH | UM  |
| AT4G24310 | UM  | UM   | UM  | UM  | UM  | UM  | UM   | UM  |
| AT4G24320 | UM  | UM   | UM  | UM  | UM  | UM  | UM   | UM  |
| AT4G24330 | UM  | UM   | UM  | UM  | UM  | UM  | UM   | UM  |
| AT4G24340 | UM  | UM   | UM  | UM  | UM  | UM  | mCHH | UM  |
| AT4G24350 | UM  | UM   | UM  | UM  | UM  | UM  | UM   | UM  |
| AT4G24370 | UM  | UM   | UM  | UM  | UM  | UM  | UM   | UM  |
| AT4G24380 | UM  | UM   | UM  | UM  | UM  | UM  | mCHH | UM  |
| AT4G24390 | UM  | UM   | UM  | UM  | UM  | UM  | UM   | UM  |
| AT4G24400 | UM  | UM   | UM  | UM  | UM  | UM  | mCHH | UM  |
| AT4G24410 | UM  | UM   | UM  | UM  | UM  | UM  | UM   | UM  |
| AT4G24420 | UM  | UM   | UM  | UM  | UM  | UM  | UM   | UM  |
| AT4G24430 | UM  | UM   | UM  | UM  | UM  | UM  | mCHH | UM  |
| AT4G24440 | UM  | UM   | UM  | UM  | UM  | UM  | UM   | UM  |
| AT4G24450 | UM  | UM   | UM  | UM  | UM  | UM  | mCHH | UM  |
| AT4G24460 | UM  | UM   | UM  | UM  | UM  | UM  | UM   | UM  |
| AT4G24470 | UM  | UM   | UM  | UM  | UM  | UM  | UM   | UM  |
| AT4G24480 | UM  | UM   | UM  | UM  | UM  | UM  | UM   | UM  |
| AT4G24490 | UM  | UM   | UM  | UM  | UM  | UM  | mCHH | UM  |
| AT4G24500 | UM  | UM   | UM  | UM  | UM  | UM  | UM   | UM  |
| AT4G24510 | UM  | UM   | UM  | UM  | UM  | UM  | UM   | UM  |
| AT4G24520 | UM  | gbM  | gbM | UM  | UM  | UM  | mCHH | UM  |
| AT4G24530 | UM  | UM   | UM  | UM  | UM  | UM  | mCHH | UM  |
| AT4G24540 | UM  | UM   | UM  | UM  | UM  | UM  | UM   | UM  |
| AT4G24550 | UM  | UM   | UM  | UM  | UM  | UM  | mCHH | UM  |
| AT4G24560 | gbM | gbM  | UM  | UM  | UM  | UM  | mCHH | UM  |
| AT4G24570 | UM  | UM   | UM  | UM  | UM  | UM  | UM   | UM  |
| AT4G24580 | UM  | UM   | UM  | UM  | UM  | UM  | mCHH | UM  |
| AT4G24590 | UM  | UM   | UM  | UM  | UM  | UM  | UM   | UM  |
| AT4G24600 | UM  | UM   | UM  | UM  | UM  | UM  | UM   | UM  |
| AT4G24610 | UM  | mCHH | UM  | UM  | UM  | UM  | mCHH | UM  |

|           |     |      |     |     |     |     |      |     |
|-----------|-----|------|-----|-----|-----|-----|------|-----|
| AT4G24620 | UM  | UM   | UM  | UM  | UM  | UM  | mCHH | UM  |
| AT4G24630 | UM  | UM   | gbM | UM  | gbM | gbM | gbM  | UM  |
| AT4G24640 | UM  | UM   | UM  | UM  | UM  | UM  | UM   | UM  |
| AT4G24644 | UM  | UM   | UM  | UM  | UM  | UM  | UM   | UM  |
| AT4G24650 | UM  | UM   | UM  | UM  | UM  | UM  | UM   | UM  |
| AT4G24660 | UM  | UM   | UM  | UM  | UM  | UM  | UM   | UM  |
| AT4G24670 | UM  | UM   | UM  | UM  | UM  | UM  | UM   | UM  |
| AT4G24680 | gbM | mCHH | gbM | gbM | gbM | gbM | mCHH | gbM |
| AT4G24690 | UM  | UM   | UM  | UM  | UM  | UM  | mCHH | UM  |
| AT4G24700 | UM  | UM   | UM  | UM  | UM  | UM  | mCHH | UM  |
| AT4G24710 | UM  | UM   | UM  | UM  | UM  | UM  | UM   | UM  |
| AT4G24730 | UM  | UM   | UM  | UM  | UM  | UM  | mCHH | UM  |
| AT4G24740 | UM  | UM   | UM  | UM  | UM  | UM  | mCHH | UM  |
| AT4G24750 | UM  | UM   | UM  | UM  | UM  | UM  | UM   | UM  |
| AT4G24760 | UM  | UM   | UM  | UM  | UM  | UM  | mCHH | UM  |
| AT4G24770 | UM  | UM   | UM  | UM  | UM  | UM  | mCHH | UM  |
| AT4G24780 | UM  | UM   | UM  | UM  | UM  | UM  | UM   | UM  |
| AT4G24790 | gbM | gbM  | gbM | UM  | UM  | gbM | mCHH | UM  |
| AT4G24800 | gbM | gbM  | gbM | gbM | gbM | gbM | mCHH | gbM |
| AT4G24805 | UM  | UM   | UM  | UM  | UM  | UM  | UM   | UM  |
| AT4G24810 | UM  | UM   | UM  | UM  | UM  | UM  | mCHH | UM  |
| AT4G24820 | UM  | UM   | UM  | UM  | UM  | UM  | UM   | UM  |
| AT4G24830 | UM  | UM   | UM  | UM  | UM  | UM  | UM   | UM  |
| AT4G24840 | UM  | UM   | UM  | UM  | UM  | UM  | mCHH | UM  |
| AT4G24860 | UM  | UM   | UM  | UM  | UM  | UM  | mCHH | UM  |
| AT4G24880 | UM  | UM   | UM  | UM  | UM  | UM  | UM   | UM  |
| AT4G24890 | UM  | UM   | UM  | UM  | UM  | UM  | mCHH | UM  |
| AT4G24900 | UM  | UM   | UM  | UM  | UM  | UM  | mCHH | UM  |
| AT4G24910 | UM  | UM   | UM  | UM  | UM  | UM  | mCHH | UM  |
| AT4G24920 | UM  | UM   | UM  | UM  | UM  | UM  | UM   | UM  |
| AT4G24930 | UM  | UM   | UM  | UM  | UM  | UM  | mCHH | UM  |
| AT4G24940 | UM  | UM   | UM  | UM  | UM  | UM  | mCHH | UM  |
| AT4G24950 | UM  | UM   | UM  | UM  | UM  | UM  | mCHH | UM  |
| AT4G24960 | UM  | UM   | UM  | UM  | UM  | UM  | UM   | UM  |
| AT4G24970 | UM  | UM   | UM  | UM  | UM  | UM  | mCHH | UM  |
| AT4G24972 | UM  | UM   | UM  | UM  | UM  | UM  | UM   | UM  |
| AT4G24973 | UM  | UM   | UM  | UM  | UM  | UM  | mCHH | UM  |
| AT4G24974 | UM  | UM   | UM  | UM  | UM  | UM  | mCHH | UM  |
| AT4G24975 | UM  | mCHH | UM  | UM  | UM  | UM  | mCHH | UM  |
| AT4G24980 | UM  | UM   | UM  | UM  | UM  | UM  | UM   | UM  |
| AT4G24990 | UM  | UM   | UM  | UM  | UM  | UM  | UM   | UM  |
| AT4G25000 | UM  | UM   | UM  | UM  | UM  | UM  | mCHH | UM  |
| AT4G25010 | UM  | UM   | UM  | UM  | UM  | UM  | UM   | UM  |
| AT4G25020 | UM  | UM   | UM  | UM  | UM  | UM  | UM   | UM  |
| AT4G25030 | gbM | UM   | gbM | gbM | gbM | gbM | gbM  | gbM |
| AT4G25040 | UM  | UM   | UM  | UM  | UM  | UM  | UM   | UM  |
| AT4G25050 | UM  | UM   | UM  | UM  | UM  | UM  | UM   | UM  |
| AT4G25070 | UM  | UM   | UM  | UM  | UM  | UM  | mCHH | UM  |

|           |      |      |     |      |      |      |      |      |
|-----------|------|------|-----|------|------|------|------|------|
| AT4G25080 | UM   | UM   | UM  | UM   | UM   | UM   | UM   | UM   |
| AT4G25090 | UM   | UM   | UM  | UM   | UM   | UM   | mCHH | UM   |
| AT4G25100 | UM   | UM   | UM  | UM   | UM   | UM   | UM   | UM   |
| AT4G25110 | UM   | UM   | UM  | UM   | UM   | UM   | UM   | UM   |
| AT4G25120 | gbM  | gbM  | gbM | gbM  | gbM  | gbM  | mCHH | gbM  |
| AT4G25130 | UM   | UM   | UM  | UM   | UM   | UM   | UM   | UM   |
| AT4G25140 | UM   | UM   | UM  | UM   | UM   | UM   | UM   | UM   |
| AT4G25150 | UM   | UM   | UM  | UM   | UM   | UM   | UM   | UM   |
| AT4G25160 | UM   | UM   | UM  | UM   | UM   | UM   | mCHH | UM   |
| AT4G25170 | UM   | UM   | UM  | UM   | UM   | UM   | mCHH | UM   |
| AT4G25180 | UM   | UM   | UM  | UM   | UM   | UM   | UM   | UM   |
| AT4G25190 | UM   | UM   | UM  | UM   | UM   | UM   | UM   | UM   |
| AT4G25200 | UM   | UM   | UM  | UM   | UM   | UM   | UM   | UM   |
| AT4G25210 | mCHG | mCHH | UM  | UM   | UM   | UM   | mCHH | UM   |
| AT4G25220 | UM   | UM   | UM  | UM   | UM   | UM   | mCHH | UM   |
| AT4G25225 | UM   | UM   | UM  | UM   | UM   | UM   | UM   | UM   |
| AT4G25230 | UM   | mCHH | gbM | UM   | gbM  | gbM  | mCHH | UM   |
| AT4G25240 | UM   | UM   | UM  | UM   | UM   | UM   | mCHH | UM   |
| AT4G25250 | UM   | UM   | UM  | UM   | UM   | UM   | UM   | UM   |
| AT4G25260 | UM   | UM   | UM  | UM   | UM   | UM   | UM   | UM   |
| AT4G25270 | UM   | UM   | UM  | UM   | UM   | UM   | UM   | UM   |
| AT4G25280 | UM   | UM   | UM  | UM   | UM   | UM   | UM   | UM   |
| AT4G25290 | gbM  | gbM  | UM  | UM   | UM   | UM   | mCHH | UM   |
| AT4G25300 | UM   | UM   | UM  | UM   | UM   | UM   | UM   | UM   |
| AT4G25310 | UM   | UM   | UM  | UM   | UM   | UM   | UM   | UM   |
| AT4G25315 | UM   | UM   | UM  | UM   | UM   | UM   | mCHH | UM   |
| AT4G25320 | UM   | UM   | UM  | UM   | UM   | UM   | UM   | UM   |
| AT4G25330 | UM   | UM   | UM  | UM   | UM   | UM   | UM   | UM   |
| AT4G25340 | UM   | UM   | UM  | UM   | UM   | UM   | mCHH | UM   |
| AT4G25350 | UM   | UM   | UM  | UM   | UM   | UM   | mCHH | UM   |
| AT4G25360 | gbM  | gbM  | gbM | UM   | gbM  | gbM  | mCHH | gbM  |
| AT4G25370 | UM   | UM   | UM  | UM   | UM   | UM   | UM   | UM   |
| AT4G25380 | UM   | UM   | UM  | UM   | UM   | UM   | UM   | UM   |
| AT4G25386 | UM   | UM   | UM  | UM   | UM   | UM   | UM   | UM   |
| AT4G25390 | UM   | UM   | UM  | UM   | UM   | UM   | UM   | UM   |
| AT4G25400 | mCHG | mCHG | UM  | mCHG | mCHG | mCHG | mCHG | mCHG |
| AT4G25410 | UM   | UM   | UM  | UM   | UM   | UM   | UM   | UM   |
| AT4G25420 | UM   | UM   | UM  | UM   | UM   | UM   | UM   | UM   |
| AT4G25430 | UM   | UM   | UM  | UM   | UM   | UM   | mCHH | UM   |
| AT4G25433 | UM   | UM   | UM  | UM   | UM   | UM   | UM   | UM   |
| AT4G25434 | UM   | UM   | UM  | UM   | UM   | UM   | UM   | UM   |
| AT4G25440 | UM   | UM   | UM  | UM   | UM   | UM   | UM   | UM   |
| AT4G25450 | UM   | UM   | UM  | UM   | UM   | UM   | mCHH | UM   |
| AT4G25470 | UM   | UM   | UM  | UM   | UM   | UM   | UM   | UM   |
| AT4G25480 | UM   | UM   | UM  | UM   | UM   | UM   | UM   | UM   |
| AT4G25490 | UM   | UM   | UM  | UM   | UM   | UM   | UM   | UM   |
| AT4G25500 | gbM  | gbM  | gbM | gbM  | gbM  | gbM  | gbM  | gbM  |
| AT4G25510 | UM   | UM   | UM  | UM   | UM   | UM   | UM   | UM   |

|           |      |      |     |     |     |     |      |     |
|-----------|------|------|-----|-----|-----|-----|------|-----|
| AT4G25515 | UM   | gbM  | UM  | UM  | UM  | UM  | mCHH | UM  |
| AT4G25520 | gbM  | gbM  | gbM | gbM | gbM | gbM | mCHH | gbM |
| AT4G25530 | UM   | UM   | UM  | UM  | UM  | UM  | mCHH | UM  |
| AT4G25540 | UM   | UM   | UM  | UM  | UM  | UM  | mCHH | UM  |
| AT4G25550 | UM   | UM   | UM  | UM  | UM  | UM  | UM   | UM  |
| AT4G25560 | UM   | UM   | UM  | UM  | UM  | UM  | mCHH | UM  |
| AT4G25570 | UM   | UM   | UM  | UM  | UM  | UM  | UM   | UM  |
| AT4G25580 | UM   | UM   | UM  | UM  | UM  | UM  | UM   | UM  |
| AT4G25590 | UM   | UM   | UM  | UM  | UM  | UM  | UM   | UM  |
| AT4G25600 | UM   | UM   | UM  | UM  | UM  | UM  | mCHH | UM  |
| AT4G25610 | gbM  | gbM  | gbM | UM  | gbM | gbM | mCHH | gbM |
| AT4G25620 | UM   | UM   | UM  | UM  | UM  | UM  | UM   | UM  |
| AT4G25630 | UM   | UM   | UM  | UM  | UM  | UM  | UM   | UM  |
| AT4G25640 | UM   | UM   | UM  | UM  | UM  | UM  | mCHH | UM  |
| AT4G25650 | UM   | UM   | UM  | UM  | UM  | UM  | mCHH | UM  |
| AT4G25660 | UM   | UM   | UM  | UM  | UM  | UM  | UM   | UM  |
| AT4G25670 | UM   | UM   | UM  | UM  | UM  | UM  | UM   | UM  |
| AT4G25672 | UM   | UM   | UM  | UM  | UM  | UM  | UM   | UM  |
| AT4G25680 | UM   | gbM  | UM  | UM  | UM  | UM  | UM   | UM  |
| AT4G25690 | UM   | UM   | UM  | UM  | UM  | UM  | UM   | UM  |
| AT4G25692 | UM   | UM   | UM  | UM  | UM  | UM  | UM   | UM  |
| AT4G25700 | UM   | UM   | UM  | UM  | UM  | UM  | UM   | UM  |
| AT4G25707 | UM   | UM   | UM  | UM  | UM  | UM  | UM   | UM  |
| AT4G25710 | UM   | UM   | UM  | UM  | UM  | UM  | UM   | UM  |
| AT4G25720 | UM   | UM   | UM  | UM  | UM  | UM  | mCHH | UM  |
| AT4G25730 | mCHH | mCHH | UM  | UM  | UM  | UM  | mCHH | UM  |
| AT4G25740 | UM   | UM   | UM  | UM  | UM  | UM  | UM   | UM  |
| AT4G25750 | UM   | UM   | UM  | UM  | UM  | UM  | mCHH | UM  |
| AT4G25760 | UM   | UM   | UM  | UM  | UM  | UM  | UM   | UM  |
| AT4G25770 | UM   | UM   | UM  | UM  | UM  | UM  | UM   | UM  |
| AT4G25780 | UM   | UM   | UM  | UM  | UM  | UM  | UM   | UM  |
| AT4G25790 | UM   | UM   | UM  | UM  | UM  | UM  | UM   | UM  |
| AT4G25800 | UM   | UM   | UM  | UM  | UM  | UM  | mCHH | UM  |
| AT4G25810 | UM   | UM   | UM  | UM  | UM  | UM  | UM   | UM  |
| AT4G25820 | UM   | UM   | UM  | UM  | UM  | UM  | UM   | UM  |
| AT4G25830 | UM   | UM   | UM  | UM  | UM  | UM  | mCHH | UM  |
| AT4G25835 | UM   | UM   | UM  | UM  | UM  | UM  | mCHH | UM  |
| AT4G25840 | UM   | UM   | UM  | UM  | UM  | UM  | UM   | UM  |
| AT4G25845 | UM   | UM   | UM  | UM  | UM  | UM  | UM   | UM  |
| AT4G25850 | UM   | UM   | UM  | UM  | UM  | UM  | UM   | UM  |
| AT4G25860 | UM   | UM   | UM  | UM  | UM  | UM  | mCHH | UM  |
| AT4G25870 | UM   | UM   | UM  | UM  | UM  | UM  | mCHH | UM  |
| AT4G25880 | gbM  | gbM  | gbM | gbM | gbM | gbM | mCHH | gbM |
| AT4G25890 | UM   | UM   | UM  | UM  | UM  | UM  | UM   | UM  |
| AT4G25900 | UM   | UM   | UM  | UM  | UM  | UM  | mCHH | UM  |
| AT4G25910 | UM   | UM   | UM  | UM  | UM  | UM  | UM   | UM  |
| AT4G25920 | UM   | UM   | UM  | UM  | UM  | UM  | mCHH | UM  |
| AT4G25930 | UM   | UM   | UM  | UM  | UM  | UM  | UM   | UM  |









|           |      |      |      |     |     |     |      |     |
|-----------|------|------|------|-----|-----|-----|------|-----|
| AT4G27310 | UM   | UM   | UM   | UM  | UM  | UM  | UM   | UM  |
| AT4G27320 | UM   | UM   | UM   | UM  | UM  | UM  | UM   | UM  |
| AT4G27330 | UM   | UM   | UM   | UM  | UM  | UM  | UM   | UM  |
| AT4G27340 | UM   | UM   | UM   | UM  | UM  | UM  | mCHH | UM  |
| AT4G27350 | UM   | UM   | UM   | UM  | UM  | UM  | UM   | UM  |
| AT4G27360 | UM   | UM   | UM   | UM  | UM  | UM  | mCHH | UM  |
| AT4G27370 | gbM  | mCHH | gbM  | UM  | UM  | UM  | mCHH | UM  |
| AT4G27380 | gbM  | gbM  | gbM  | gbM | UM  | UM  | gbM  | UM  |
| AT4G27390 | UM   | UM   | UM   | UM  | UM  | UM  | UM   | UM  |
| AT4G27400 | UM   | UM   | UM   | UM  | UM  | UM  | mCHH | UM  |
| AT4G27410 | UM   | UM   | UM   | UM  | UM  | UM  | UM   | UM  |
| AT4G27415 | UM   | UM   | UM   | UM  | UM  | UM  | UM   | UM  |
| AT4G27420 | UM   | UM   | UM   | UM  | UM  | UM  | mCHH | UM  |
| AT4G27430 | gbM  | mCHH | UM   | UM  | UM  | gbM | mCHH | UM  |
| AT4G27435 | UM   | UM   | UM   | UM  | UM  | UM  | UM   | UM  |
| AT4G27440 | UM   | UM   | UM   | UM  | UM  | UM  | mCHH | UM  |
| AT4G27450 | UM   | UM   | UM   | UM  | UM  | UM  | UM   | UM  |
| AT4G27460 | UM   | UM   | UM   | UM  | UM  | UM  | UM   | UM  |
| AT4G27470 | UM   | UM   | UM   | UM  | UM  | UM  | UM   | UM  |
| AT4G27480 | UM   | UM   | UM   | UM  | UM  | UM  | mCHH | UM  |
| AT4G27490 | UM   | UM   | UM   | UM  | UM  | UM  | mCHH | UM  |
| AT4G27500 | gbM  | gbM  | gbM  | gbM | gbM | gbM | mCHH | gbM |
| AT4G27510 | UM   | UM   | UM   | UM  | UM  | UM  | mCHH | UM  |
| AT4G27520 | UM   | UM   | UM   | UM  | UM  | UM  | UM   | UM  |
| AT4G27530 | UM   | UM   | UM   | UM  | UM  | UM  | UM   | UM  |
| AT4G27540 | UM   | UM   | UM   | UM  | UM  | UM  | UM   | UM  |
| AT4G27550 | UM   | UM   | UM   | UM  | UM  | UM  | mCHH | UM  |
| AT4G27560 | UM   | UM   | UM   | UM  | UM  | UM  | UM   | UM  |
| AT4G27570 | UM   | UM   | UM   | UM  | UM  | UM  | mCHH | UM  |
| AT4G27580 | UM   | UM   | UM   | UM  | UM  | UM  | UM   | UM  |
| AT4G27585 | UM   | UM   | UM   | UM  | UM  | UM  | mCHH | UM  |
| AT4G27590 | UM   | UM   | UM   | UM  | UM  | UM  | mCHH | UM  |
| AT4G27595 | mCHH | mCHH | mCHH | UM  | UM  | UM  | mCHH | UM  |
| AT4G27600 | UM   | UM   | UM   | UM  | UM  | UM  | UM   | UM  |
| AT4G27610 | gbM  | gbM  | gbM  | gbM | gbM | gbM | gbM  | gbM |
| AT4G27620 | UM   | UM   | UM   | UM  | UM  | UM  | gbM  | UM  |
| AT4G27630 | UM   | UM   | UM   | UM  | UM  | UM  | mCHH | UM  |
| AT4G27640 | UM   | gbM  | UM   | UM  | UM  | UM  | mCHH | UM  |
| AT4G27650 | UM   | UM   | UM   | UM  | UM  | UM  | mCHH | UM  |
| AT4G27652 | UM   | UM   | UM   | UM  | UM  | UM  | UM   | UM  |
| AT4G27654 | UM   | UM   | UM   | UM  | UM  | UM  | UM   | UM  |
| AT4G27657 | UM   | UM   | UM   | UM  | UM  | UM  | UM   | UM  |
| AT4G27660 | UM   | UM   | UM   | UM  | UM  | UM  | UM   | UM  |
| AT4G27670 | UM   | UM   | UM   | UM  | UM  | UM  | UM   | UM  |
| AT4G27680 | UM   | UM   | UM   | UM  | UM  | UM  | mCHH | UM  |
| AT4G27690 | UM   | mCHH | UM   | UM  | UM  | UM  | mCHH | UM  |
| AT4G27700 | UM   | UM   | UM   | UM  | UM  | UM  | UM   | UM  |
| AT4G27710 | UM   | UM   | UM   | UM  | UM  | UM  | mCHH | UM  |







|           |      |      |      |      |      |      |      |      |
|-----------|------|------|------|------|------|------|------|------|
| AT4G29030 | UM   |
| AT4G29033 | UM   |
| AT4G29035 | mCHH | mCHH | mCHH | mCHG | gbM  | mCHH | mCHH | mCHH |
| AT4G29040 | UM   | UM   | UM   | UM   | UM   | UM   | mCHH | UM   |
| AT4G29050 | UM   | UM   | UM   | UM   | UM   | UM   | mCHH | UM   |
| AT4G29060 | gbM  | mCHH | gbM  | gbM  | gbM  | gbM  | mCHH | gbM  |
| AT4G29070 | UM   |
| AT4G29080 | UM   |
| AT4G29090 | mCHH |
| AT4G29100 | UM   |
| AT4G29103 | UM   |
| AT4G29110 | UM   |
| AT4G29120 | UM   |
| AT4G29130 | gbM  | gbM  | gbM  | gbM  | UM   | UM   | gbM  | UM   |
| AT4G29140 | UM   |
| AT4G29150 | UM   |
| AT4G29160 | UM   |
| AT4G29170 | UM   |
| AT4G29180 | UM   | UM   | UM   | UM   | UM   | UM   | mCHH | UM   |
| AT4G29190 | UM   |
| AT4G29200 | mCHH |
| AT4G29210 | UM   | UM   | UM   | UM   | UM   | UM   | mCHH | UM   |
| AT4G29220 | gbM  | gbM  | gbM  | UM   | UM   | gbM  | mCHH | gbM  |
| AT4G29230 | mCHH | UM   | UM   | UM   | UM   | UM   | mCHH | UM   |
| AT4G29240 | UM   |
| AT4G29250 | UM   | UM   | UM   | UM   | UM   | UM   | mCHH | UM   |
| AT4G29260 | UM   |
| AT4G29270 | UM   |
| AT4G29273 | UM   |
| AT4G29280 | UM   |
| AT4G29283 | UM   |
| AT4G29285 | UM   | UM   | UM   | UM   | UM   | UM   | mCHH | UM   |
| AT4G29290 | mCHH | mCHH | mCHH | UM   | UM   | UM   | mCHH | UM   |
| AT4G29300 | mCHH | mCHH | mCHH | mCHG | mCHH | mCHG | mCHH | mCHG |
| AT4G29305 | mCHH | mCHH | mCHH | UM   | UM   | UM   | mCHH | mCHG |
| AT4G29310 | UM   |
| AT4G29330 | UM   |
| AT4G29340 | UM   |
| AT4G29350 | UM   |
| AT4G29360 | UM   | UM   | UM   | UM   | UM   | UM   | mCHH | UM   |
| AT4G29370 | UM   |
| AT4G29380 | gbM  | gbM  | gbM  | gbM  | gbM  | gbM  | mCHH | gbM  |
| AT4G29390 | UM   |
| AT4G29400 | UM   | UM   | UM   | UM   | UM   | UM   | mCHH | UM   |
| AT4G29410 | UM   |
| AT4G29420 | UM   |
| AT4G29430 | UM   |
| AT4G29440 | gbM  | gbM  | gbM  | UM   | gbM  | UM   | mCHH | UM   |



|           |      |      |      |      |      |      |      |      |
|-----------|------|------|------|------|------|------|------|------|
| AT4G29450 | UM   | mCHH | UM   | UM   | UM   | UM   | mCHH | UM   |
| AT4G29460 | UM   |
| AT4G29470 | UM   |
| AT4G29480 | UM   |
| AT4G29490 | UM   | UM   | UM   | UM   | UM   | UM   | mCHH | UM   |
| AT4G29510 | UM   | UM   | UM   | UM   | UM   | UM   | mCHH | UM   |
| AT4G29520 | UM   | UM   | UM   | UM   | UM   | UM   | mCHH | UM   |
| AT4G29530 | UM   | mCHH | UM   | UM   | UM   | UM   | UM   | UM   |
| AT4G29540 | UM   | UM   | UM   | gbM  | UM   | UM   | gbM  | gbM  |
| AT4G29548 | UM   |
| AT4G29550 | UM   | UM   | UM   | UM   | UM   | UM   | mCHH | UM   |
| AT4G29560 | UM   | UM   | UM   | UM   | UM   | UM   | mCHH | UM   |
| AT4G29570 | UM   |
| AT4G29580 | UM   |
| AT4G29590 | UM   |
| AT4G29600 | UM   |
| AT4G29610 | UM   |
| AT4G29620 | UM   |
| AT4G29630 | UM   |
| AT4G29640 | UM   |
| AT4G29650 | UM   |
| AT4G29654 | mCHH |
| AT4G29658 | UM   |
| AT4G29660 | UM   |
| AT4G29670 | UM   |
| AT4G29680 | UM   |
| AT4G29690 | UM   |
| AT4G29700 | UM   |
| AT4G29710 | UM   |
| AT4G29720 | UM   |
| AT4G29730 | UM   | UM   | UM   | UM   | UM   | UM   | mCHH | UM   |
| AT4G29735 | UM   |
| AT4G29740 | UM   |
| AT4G29750 | gbM  | gbM  | gbM  | gbM  | gbM  | gbM  | mCHH | UM   |
| AT4G29760 | UM   |
| AT4G29770 | UM   | UM   | UM   | UM   | UM   | UM   | mCHH | UM   |
| AT4G29780 | UM   |
| AT4G29790 | gbM  | mCHH | gbM  | gbM  | gbM  | gbM  | mCHH | gbM  |
| AT4G29800 | UM   |
| AT4G29810 | UM   | UM   | UM   | UM   | UM   | UM   | mCHH | UM   |
| AT4G29820 | UM   |
| AT4G29830 | UM   |
| AT4G29840 | UM   |
| AT4G29850 | UM   |
| AT4G29860 | UM   | UM   | UM   | UM   | UM   | UM   | mCHH | UM   |
| AT4G29870 | UM   |
| AT4G29880 | UM   |
| AT4G29890 | UM   |



|           |      |      |      |      |      |      |      |      |
|-----------|------|------|------|------|------|------|------|------|
| AT4G30330 | UM   |
| AT4G30340 | UM   | UM   | UM   | UM   | UM   | UM   | mCHH | UM   |
| AT4G30350 | UM   | UM   | UM   | UM   | UM   | UM   | mCHH | UM   |
| AT4G30360 | gbM  | gbM  | gbM  | gbM  | gbM  | gbM  | mCHH | gbM  |
| AT4G30370 | UM   |
| AT4G30380 | UM   |
| AT4G30390 | UM   |
| AT4G30400 | UM   | UM   | UM   | UM   | UM   | UM   | mCHH | UM   |
| AT4G30410 | UM   |
| AT4G30420 | UM   | UM   | UM   | UM   | UM   | UM   | mCHH | UM   |
| AT4G30430 | UM   | UM   | UM   | UM   | UM   | UM   | mCHH | UM   |
| AT4G30440 | UM   |
| AT4G30450 | UM   |
| AT4G30460 | UM   |
| AT4G30470 | UM   |
| AT4G30480 | UM   |
| AT4G30490 | UM   |
| AT4G30500 | UM   |
| AT4G30510 | UM   | UM   | UM   | UM   | UM   | UM   | mCHH | UM   |
| AT4G30520 | UM   | UM   | UM   | UM   | UM   | UM   | mCHH | UM   |
| AT4G30530 | UM   |
| AT4G30540 | UM   |
| AT4G30550 | UM   | UM   | UM   | UM   | UM   | UM   | mCHH | UM   |
| AT4G30560 | gbM  | gbM  | gbM  | gbM  | gbM  | gbM  | mCHH | gbM  |
| AT4G30570 | UM   | UM   | UM   | UM   | UM   | UM   | mCHH | UM   |
| AT4G30580 | UM   | UM   | UM   | UM   | UM   | UM   | mCHH | UM   |
| AT4G30590 | UM   |
| AT4G30600 | UM   | UM   | UM   | UM   | UM   | UM   | mCHH | UM   |
| AT4G30610 | UM   | UM   | UM   | UM   | UM   | UM   | mCHH | UM   |
| AT4G30620 | UM   |
| AT4G30630 | UM   | UM   | UM   | UM   | UM   | UM   | mCHH | UM   |
| AT4G30640 | UM   |
| AT4G30650 | UM   |
| AT4G30660 | UM   |
| AT4G30662 | UM   |
| AT4G30670 | UM   |
| AT4G30680 | UM   |
| AT4G30690 | UM   |
| AT4G30700 | UM   | UM   | UM   | UM   | UM   | UM   | mCHH | UM   |
| AT4G30710 | mCHH | mCHH | mCHG | mCHG | mCHG | gbM  | mCHH | mCHG |
| AT4G30720 | UM   | UM   | UM   | UM   | UM   | UM   | mCHH | UM   |
| AT4G30730 | UM   |
| AT4G30740 | mCHH | mCHH | mCHH | mCHG | mCHH | mCHG | mCHH | mCHG |
| AT4G30750 | UM   | UM   | UM   | UM   | UM   | UM   | mCHH | UM   |
| AT4G30760 | UM   |
| AT4G30770 | UM   | UM   | UM   | UM   | UM   | UM   | mCHH | UM   |
| AT4G30780 | UM   | UM   | UM   | UM   | UM   | UM   | mCHH | UM   |
| AT4G30790 | gbM  | mCHH | gbM  | gbM  | gbM  | gbM  | mCHH | gbM  |



|           |      |      |     |     |     |     |      |     |
|-----------|------|------|-----|-----|-----|-----|------|-----|
| AT4G31230 | UM   | UM   | UM  | UM  | UM  | UM  | mCHH | UM  |
| AT4G31240 | gbM  | gbM  | gbM | gbM | gbM | gbM | gbM  | gbM |
| AT4G31250 | UM   | UM   | UM  | UM  | UM  | UM  | UM   | UM  |
| AT4G31260 | UM   | UM   | UM  | UM  | UM  | UM  | UM   | UM  |
| AT4G31270 | UM   | UM   | UM  | UM  | UM  | UM  | mCHH | UM  |
| AT4G31280 | UM   | UM   | UM  | UM  | UM  | UM  | UM   | UM  |
| AT4G31290 | UM   | UM   | UM  | UM  | UM  | UM  | UM   | UM  |
| AT4G31300 | UM   | UM   | UM  | UM  | UM  | UM  | UM   | UM  |
| AT4G31310 | UM   | UM   | UM  | UM  | UM  | UM  | UM   | UM  |
| AT4G31320 | UM   | UM   | UM  | UM  | UM  | UM  | UM   | UM  |
| AT4G31330 | UM   | UM   | UM  | UM  | UM  | UM  | UM   | UM  |
| AT4G31340 | UM   | UM   | UM  | UM  | UM  | UM  | mCHH | UM  |
| AT4G31350 | UM   | UM   | UM  | UM  | UM  | UM  | mCHH | UM  |
| AT4G31351 | UM   | UM   | UM  | UM  | UM  | UM  | UM   | UM  |
| AT4G31354 | UM   | UM   | UM  | UM  | UM  | UM  | UM   | UM  |
| AT4G31355 | UM   | UM   | UM  | UM  | UM  | UM  | UM   | UM  |
| AT4G31360 | UM   | UM   | UM  | UM  | UM  | UM  | UM   | UM  |
| AT4G31370 | UM   | UM   | UM  | UM  | UM  | UM  | UM   | UM  |
| AT4G31380 | UM   | UM   | UM  | UM  | UM  | UM  | UM   | UM  |
| AT4G31390 | UM   | UM   | UM  | UM  | UM  | UM  | mCHH | UM  |
| AT4G31400 | UM   | UM   | UM  | UM  | UM  | UM  | UM   | UM  |
| AT4G31410 | gbM  | gbM  | gbM | UM  | UM  | UM  | mCHH | UM  |
| AT4G31420 | UM   | UM   | UM  | UM  | UM  | UM  | mCHH | UM  |
| AT4G31430 | UM   | UM   | UM  | UM  | UM  | UM  | mCHH | UM  |
| AT4G31440 | gbM  | gbM  | gbM | gbM | gbM | gbM | gbM  | gbM |
| AT4G31441 | UM   | UM   | UM  | UM  | UM  | UM  | UM   | UM  |
| AT4G31450 | UM   | UM   | UM  | UM  | UM  | UM  | mCHH | UM  |
| AT4G31460 | UM   | UM   | UM  | UM  | UM  | UM  | UM   | UM  |
| AT4G31470 | UM   | UM   | UM  | UM  | UM  | UM  | UM   | UM  |
| AT4G31480 | gbM  | gbM  | gbM | gbM | gbM | gbM | mCHH | gbM |
| AT4G31490 | gbM  | gbM  | gbM | gbM | gbM | gbM | mCHH | gbM |
| AT4G31500 | UM   | UM   | UM  | UM  | UM  | UM  | UM   | UM  |
| AT4G31510 | UM   | UM   | UM  | UM  | UM  | UM  | UM   | UM  |
| AT4G31520 | mCHH | UM   | UM  | UM  | UM  | UM  | mCHH | UM  |
| AT4G31530 | UM   | UM   | UM  | UM  | UM  | UM  | UM   | UM  |
| AT4G31540 | gbM  | gbM  | gbM | gbM | gbM | gbM | mCHH | UM  |
| AT4G31550 | UM   | UM   | UM  | UM  | UM  | UM  | UM   | UM  |
| AT4G31560 | UM   | UM   | UM  | UM  | UM  | UM  | UM   | UM  |
| AT4G31570 | gbM  | mCHH | gbM | gbM | gbM | gbM | mCHH | gbM |
| AT4G31580 | UM   | UM   | UM  | UM  | UM  | UM  | gbM  | UM  |
| AT4G31590 | UM   | gbM  | UM  | UM  | UM  | UM  | mCHH | UM  |
| AT4G31600 | UM   | UM   | UM  | UM  | UM  | UM  | mCHH | UM  |
| AT4G31610 | UM   | mCHH | UM  | UM  | UM  | UM  | UM   | UM  |
| AT4G31615 | UM   | UM   | UM  | UM  | UM  | UM  | mCHH | UM  |
| AT4G31620 | UM   | UM   | UM  | UM  | UM  | UM  | UM   | UM  |
| AT4G31630 | UM   | UM   | UM  | UM  | UM  | UM  | mCHH | UM  |
| AT4G31640 | UM   | UM   | UM  | UM  | UM  | UM  | UM   | UM  |
| AT4G31650 | UM   | UM   | UM  | UM  | UM  | UM  | mCHH | UM  |

|           |      |     |     |     |     |     |      |     |
|-----------|------|-----|-----|-----|-----|-----|------|-----|
| AT4G31660 | UM   | UM  | UM  | UM  | UM  | UM  | mCHH | UM  |
| AT4G31670 | UM   | UM  | UM  | UM  | UM  | UM  | mCHH | UM  |
| AT4G31680 | UM   | UM  | UM  | UM  | UM  | UM  | mCHH | UM  |
| AT4G31690 | UM   | UM  | UM  | UM  | UM  | UM  | mCHH | UM  |
| AT4G31700 | UM   | UM  | UM  | UM  | UM  | UM  | UM   | UM  |
| AT4G31710 | UM   | UM  | UM  | UM  | UM  | UM  | mCHH | UM  |
| AT4G31720 | UM   | UM  | UM  | UM  | UM  | UM  | UM   | UM  |
| AT4G31730 | UM   | UM  | UM  | UM  | UM  | UM  | UM   | UM  |
| AT4G31740 | UM   | UM  | UM  | UM  | UM  | UM  | UM   | UM  |
| AT4G31750 | gbM  | gbM | UM  | UM  | UM  | UM  | mCHH | UM  |
| AT4G31760 | UM   | UM  | UM  | UM  | UM  | UM  | mCHH | UM  |
| AT4G31770 | UM   | UM  | UM  | UM  | UM  | UM  | mCHH | UM  |
| AT4G31780 | UM   | UM  | UM  | UM  | UM  | UM  | UM   | UM  |
| AT4G31790 | gbM  | gbM | UM  | UM  | gbM | UM  | gbM  | UM  |
| AT4G31800 | UM   | UM  | UM  | UM  | UM  | UM  | mCHH | UM  |
| AT4G31805 | UM   | UM  | UM  | UM  | UM  | UM  | mCHH | UM  |
| AT4G31810 | UM   | UM  | UM  | UM  | UM  | UM  | mCHH | UM  |
| AT4G31820 | UM   | UM  | UM  | UM  | UM  | UM  | mCHH | UM  |
| AT4G31830 | UM   | UM  | UM  | UM  | UM  | UM  | UM   | UM  |
| AT4G31840 | UM   | UM  | UM  | UM  | UM  | UM  | UM   | UM  |
| AT4G31850 | gbM  | gbM | gbM | UM  | UM  | UM  | mCHH | UM  |
| AT4G31860 | UM   | UM  | UM  | UM  | UM  | UM  | UM   | UM  |
| AT4G31870 | UM   | UM  | UM  | UM  | UM  | UM  | mCHH | UM  |
| AT4G31875 | UM   | UM  | UM  | UM  | UM  | UM  | UM   | UM  |
| AT4G31880 | mCHH | gbM | gbM | gbM | gbM | gbM | mCHH | gbM |
| AT4G31890 | UM   | UM  | UM  | UM  | UM  | UM  | UM   | UM  |
| AT4G31900 | UM   | UM  | UM  | UM  | UM  | UM  | mCHH | UM  |
| AT4G31910 | UM   | UM  | UM  | UM  | UM  | UM  | UM   | UM  |
| AT4G31920 | UM   | UM  | UM  | UM  | UM  | UM  | mCHH | UM  |
| AT4G31930 | UM   | UM  | UM  | UM  | UM  | UM  | UM   | UM  |
| AT4G31940 | UM   | UM  | UM  | UM  | UM  | UM  | mCHH | UM  |
| AT4G31950 | UM   | UM  | UM  | UM  | UM  | UM  | UM   | UM  |
| AT4G31960 | UM   | UM  | UM  | UM  | UM  | UM  | UM   | UM  |
| AT4G31970 | UM   | UM  | UM  | UM  | UM  | UM  | mCHH | UM  |
| AT4G31980 | UM   | UM  | UM  | UM  | UM  | UM  | mCHH | UM  |
| AT4G31985 | UM   | UM  | UM  | UM  | UM  | UM  | UM   | UM  |
| AT4G31990 | UM   | UM  | UM  | UM  | UM  | UM  | mCHH | UM  |
| AT4G32000 | UM   | UM  | UM  | UM  | UM  | UM  | mCHH | UM  |
| AT4G32010 | gbM  | gbM | gbM | gbM | gbM | gbM | mCHH | UM  |
| AT4G32020 | UM   | UM  | UM  | UM  | UM  | UM  | UM   | UM  |
| AT4G32030 | UM   | UM  | UM  | UM  | UM  | UM  | mCHH | UM  |
| AT4G32040 | UM   | UM  | UM  | UM  | UM  | UM  | UM   | UM  |
| AT4G32050 | UM   | gbM | UM  | UM  | UM  | UM  | mCHH | UM  |
| AT4G32060 | UM   | UM  | UM  | UM  | UM  | UM  | mCHH | UM  |
| AT4G32070 | UM   | UM  | UM  | UM  | UM  | UM  | mCHH | UM  |
| AT4G32080 | UM   | UM  | UM  | UM  | UM  | UM  | UM   | UM  |
| AT4G32090 | UM   | UM  | UM  | UM  | UM  | UM  | UM   | UM  |
| AT4G32100 | UM   | UM  | UM  | UM  | UM  | UM  | UM   | UM  |



|           |      |      |     |     |     |     |      |     |
|-----------|------|------|-----|-----|-----|-----|------|-----|
| AT4G32520 | gbM  | gbM  | gbM | gbM | gbM | gbM | mCHH | gbM |
| AT4G32530 | UM   | UM   | UM  | UM  | UM  | UM  | UM   | UM  |
| AT4G32540 | UM   | UM   | UM  | UM  | UM  | UM  | UM   | UM  |
| AT4G32551 | gbM  | gbM  | gbM | gbM | gbM | gbM | mCHH | gbM |
| AT4G32560 | UM   | UM   | UM  | UM  | UM  | UM  | mCHH | UM  |
| AT4G32570 | UM   | UM   | UM  | UM  | UM  | UM  | UM   | UM  |
| AT4G32580 | UM   | UM   | UM  | UM  | UM  | UM  | UM   | UM  |
| AT4G32590 | UM   | UM   | UM  | UM  | UM  | UM  | UM   | UM  |
| AT4G32600 | gbM  | gbM  | gbM | gbM | gbM | gbM | gbM  | gbM |
| AT4G32605 | UM   | UM   | UM  | UM  | UM  | UM  | mCHH | UM  |
| AT4G32610 | UM   | UM   | UM  | UM  | UM  | UM  | mCHH | UM  |
| AT4G32620 | mCHH | mCHH | gbM | gbM | gbM | gbM | mCHH | gbM |
| AT4G32630 | UM   | UM   | UM  | UM  | UM  | UM  | mCHH | UM  |
| AT4G32640 | gbM  | gbM  | gbM | UM  | gbM | gbM | mCHH | gbM |
| AT4G32650 | UM   | UM   | UM  | UM  | UM  | UM  | mCHH | UM  |
| AT4G32660 | UM   | UM   | UM  | UM  | UM  | UM  | mCHH | UM  |
| AT4G32670 | gbM  | mCHH | gbM | gbM | gbM | gbM | mCHH | gbM |
| AT4G32680 | UM   | UM   | UM  | UM  | UM  | UM  | UM   | UM  |
| AT4G32690 | UM   | UM   | UM  | UM  | UM  | UM  | UM   | UM  |
| AT4G32700 | gbM  | mCHH | gbM | gbM | gbM | gbM | mCHH | gbM |
| AT4G32710 | gbM  | UM   | UM  | UM  | UM  | UM  | UM   | UM  |
| AT4G32714 | UM   | UM   | UM  | UM  | UM  | UM  | UM   | UM  |
| AT4G32717 | UM   | UM   | UM  | UM  | UM  | UM  | UM   | UM  |
| AT4G32720 | UM   | UM   | UM  | UM  | UM  | UM  | mCHH | UM  |
| AT4G32730 | gbM  | gbM  | gbM | gbM | gbM | gbM | mCHH | gbM |
| AT4G32750 | UM   | UM   | UM  | UM  | UM  | UM  | UM   | UM  |
| AT4G32760 | gbM  | gbM  | gbM | gbM | gbM | gbM | mCHH | gbM |
| AT4G32770 | UM   | UM   | UM  | UM  | UM  | UM  | mCHH | UM  |
| AT4G32780 | UM   | UM   | UM  | UM  | UM  | UM  | UM   | UM  |
| AT4G32785 | UM   | UM   | UM  | UM  | UM  | UM  | UM   | UM  |
| AT4G32790 | gbM  | gbM  | UM  | UM  | UM  | UM  | mCHH | UM  |
| AT4G32800 | UM   | UM   | UM  | UM  | UM  | UM  | UM   | UM  |
| AT4G32810 | UM   | UM   | UM  | UM  | UM  | UM  | UM   | UM  |
| AT4G32820 | gbM  | gbM  | gbM | gbM | gbM | gbM | mCHH | gbM |
| AT4G32830 | UM   | UM   | UM  | UM  | UM  | UM  | UM   | UM  |
| AT4G32840 | gbM  | gbM  | gbM | gbM | gbM | gbM | gbM  | gbM |
| AT4G32850 | gbM  | gbM  | gbM | gbM | gbM | gbM | mCHH | gbM |
| AT4G32860 | UM   | UM   | UM  | UM  | UM  | UM  | UM   | UM  |
| AT4G32870 | UM   | UM   | UM  | UM  | UM  | UM  | UM   | UM  |
| AT4G32880 | UM   | UM   | UM  | UM  | UM  | UM  | mCHH | UM  |
| AT4G32890 | UM   | UM   | UM  | UM  | UM  | UM  | UM   | UM  |
| AT4G32900 | UM   | UM   | UM  | UM  | UM  | UM  | mCHH | UM  |
| AT4G32910 | UM   | UM   | UM  | UM  | UM  | UM  | mCHH | UM  |
| AT4G32915 | UM   | UM   | UM  | UM  | UM  | UM  | UM   | UM  |
| AT4G32920 | gbM  | gbM  | gbM | UM  | gbM | gbM | mCHH | gbM |
| AT4G32924 | UM   | UM   | UM  | UM  | UM  | UM  | UM   | UM  |
| AT4G32930 | UM   | UM   | UM  | UM  | UM  | UM  | UM   | UM  |
| AT4G32940 | UM   | UM   | UM  | UM  | UM  | UM  | UM   | UM  |





|           |      |      |      |     |      |     |      |     |
|-----------|------|------|------|-----|------|-----|------|-----|
| AT4G33430 | gbM  | gbM  | gbM  | gbM | gbM  | gbM | mCHH | gbM |
| AT4G33440 | UM   | UM   | UM   | UM  | UM   | UM  | mCHH | UM  |
| AT4G33450 | UM   | UM   | UM   | UM  | UM   | UM  | UM   | UM  |
| AT4G33460 | UM   | UM   | UM   | UM  | UM   | UM  | mCHH | UM  |
| AT4G33465 | UM   | UM   | UM   | UM  | UM   | UM  | UM   | UM  |
| AT4G33467 | UM   | UM   | UM   | UM  | UM   | UM  | mCHH | UM  |
| AT4G33470 | UM   | UM   | UM   | UM  | UM   | UM  | mCHH | UM  |
| AT4G33480 | UM   | UM   | UM   | UM  | UM   | UM  | mCHH | UM  |
| AT4G33490 | UM   | UM   | UM   | UM  | UM   | UM  | UM   | UM  |
| AT4G33495 | UM   | UM   | UM   | UM  | UM   | UM  | mCHH | UM  |
| AT4G33500 | UM   | UM   | UM   | UM  | UM   | UM  | mCHH | UM  |
| AT4G33510 | UM   | UM   | UM   | UM  | UM   | UM  | UM   | UM  |
| AT4G33520 | UM   | UM   | UM   | UM  | UM   | UM  | mCHH | UM  |
| AT4G33530 | UM   | UM   | UM   | UM  | UM   | UM  | mCHH | UM  |
| AT4G33540 | UM   | UM   | UM   | UM  | UM   | UM  | mCHG | UM  |
| AT4G33550 | UM   | UM   | UM   | UM  | UM   | UM  | UM   | UM  |
| AT4G33560 | UM   | UM   | UM   | UM  | UM   | UM  | UM   | UM  |
| AT4G33565 | UM   | mCHH | UM   | UM  | UM   | UM  | mCHH | UM  |
| AT4G33580 | UM   | UM   | UM   | UM  | UM   | UM  | UM   | UM  |
| AT4G33585 | mCHG | mCHG | mCHG | gbM | mCHG | gbM | mCHH | gbM |
| AT4G33590 | UM   | gbM  | UM   | UM  | UM   | UM  | mCHH | UM  |
| AT4G33600 | UM   | UM   | UM   | UM  | UM   | UM  | UM   | UM  |
| AT4G33610 | UM   | UM   | UM   | UM  | UM   | UM  | UM   | UM  |
| AT4G33620 | UM   | UM   | UM   | UM  | UM   | UM  | mCHH | UM  |
| AT4G33625 | UM   | UM   | UM   | UM  | UM   | UM  | UM   | UM  |
| AT4G33630 | gbM  | gbM  | gbM  | UM  | UM   | gbM | mCHH | UM  |
| AT4G33640 | UM   | UM   | UM   | UM  | UM   | UM  | UM   | UM  |
| AT4G33650 | UM   | UM   | UM   | UM  | UM   | UM  | mCHH | UM  |
| AT4G33660 | UM   | UM   | UM   | UM  | UM   | UM  | UM   | UM  |
| AT4G33666 | UM   | UM   | UM   | UM  | UM   | UM  | UM   | UM  |
| AT4G33670 | UM   | UM   | UM   | UM  | UM   | UM  | UM   | UM  |
| AT4G33680 | gbM  | gbM  | gbM  | UM  | UM   | UM  | mCHH | UM  |
| AT4G33690 | UM   | UM   | UM   | UM  | UM   | UM  | UM   | UM  |
| AT4G33700 | UM   | UM   | UM   | UM  | UM   | UM  | mCHH | UM  |
| AT4G33710 | UM   | UM   | UM   | UM  | UM   | UM  | UM   | UM  |
| AT4G33720 | UM   | UM   | UM   | UM  | UM   | UM  | UM   | UM  |
| AT4G33730 | UM   | UM   | UM   | UM  | UM   | UM  | UM   | UM  |
| AT4G33740 | mCHH | mCHH | mCHH | UM  | UM   | UM  | mCHH | UM  |
| AT4G33760 | UM   | UM   | UM   | UM  | UM   | UM  | mCHH | UM  |
| AT4G33770 | UM   | UM   | UM   | UM  | UM   | UM  | UM   | UM  |
| AT4G33780 | UM   | UM   | UM   | UM  | UM   | UM  | UM   | UM  |
| AT4G33790 | UM   | UM   | UM   | UM  | UM   | UM  | mCHH | UM  |
| AT4G33800 | UM   | UM   | UM   | UM  | UM   | UM  | mCHH | UM  |
| AT4G33810 | UM   | UM   | UM   | UM  | UM   | UM  | UM   | UM  |
| AT4G33820 | UM   | UM   | UM   | UM  | UM   | UM  | mCHH | UM  |
| AT4G33830 | UM   | UM   | UM   | UM  | UM   | UM  | mCHH | UM  |
| AT4G33840 | UM   | UM   | UM   | UM  | UM   | UM  | mCHH | UM  |
| AT4G33860 | UM   | UM   | UM   | UM  | UM   | UM  | mCHH | UM  |

|           |      |      |     |     |     |     |      |     |
|-----------|------|------|-----|-----|-----|-----|------|-----|
| AT4G33865 | UM   | UM   | UM  | UM  | UM  | UM  | UM   | UM  |
| AT4G33870 | UM   | UM   | UM  | UM  | UM  | UM  | UM   | UM  |
| AT4G33880 | UM   | UM   | UM  | UM  | UM  | UM  | mCHH | UM  |
| AT4G33890 | UM   | UM   | UM  | UM  | UM  | UM  | gbM  | UM  |
| AT4G33900 | UM   | UM   | UM  | UM  | UM  | UM  | mCHH | UM  |
| AT4G33905 | UM   | UM   | UM  | UM  | UM  | UM  | mCHH | UM  |
| AT4G33910 | UM   | UM   | UM  | UM  | UM  | UM  | mCHH | UM  |
| AT4G33920 | UM   | UM   | UM  | UM  | UM  | UM  | mCHH | UM  |
| AT4G33925 | UM   | UM   | UM  | UM  | UM  | UM  | UM   | UM  |
| AT4G33930 | UM   | UM   | UM  | UM  | UM  | UM  | UM   | UM  |
| AT4G33940 | UM   | UM   | UM  | UM  | UM  | UM  | UM   | UM  |
| AT4G33945 | UM   | UM   | UM  | UM  | UM  | UM  | mCHH | UM  |
| AT4G33950 | UM   | UM   | UM  | UM  | UM  | UM  | mCHH | UM  |
| AT4G33960 | UM   | UM   | UM  | UM  | UM  | UM  | UM   | UM  |
| AT4G33970 | UM   | UM   | UM  | UM  | UM  | UM  | UM   | UM  |
| AT4G33980 | UM   | UM   | UM  | UM  | UM  | UM  | UM   | UM  |
| AT4G33985 | UM   | UM   | UM  | UM  | UM  | UM  | UM   | UM  |
| AT4G33990 | gbM  | gbM  | UM  | UM  | UM  | gbM | mCHH | UM  |
| AT4G34000 | UM   | UM   | UM  | UM  | UM  | UM  | UM   | UM  |
| AT4G34020 | UM   | UM   | UM  | UM  | UM  | UM  | mCHH | UM  |
| AT4G34030 | UM   | UM   | UM  | UM  | UM  | UM  | mCHH | UM  |
| AT4G34040 | gbM  | gbM  | gbM | gbM | gbM | gbM | mCHH | gbM |
| AT4G34050 | UM   | UM   | UM  | UM  | UM  | UM  | mCHH | UM  |
| AT4G34060 | mCHH | mCHH | UM  | UM  | UM  | UM  | mCHH | UM  |
| AT4G34070 | UM   | UM   | UM  | UM  | UM  | UM  | gbM  | UM  |
| AT4G34080 | UM   | UM   | UM  | UM  | UM  | UM  | mCHH | UM  |
| AT4G34090 | UM   | UM   | UM  | UM  | UM  | UM  | mCHH | UM  |
| AT4G34100 | gbM  | gbM  | gbM | gbM | gbM | gbM | mCHH | gbM |
| AT4G34110 | UM   | UM   | UM  | UM  | UM  | UM  | mCHH | UM  |
| AT4G34120 | UM   | UM   | UM  | UM  | UM  | UM  | UM   | UM  |
| AT4G34131 | UM   | UM   | UM  | UM  | UM  | UM  | mCHH | UM  |
| AT4G34135 | UM   | UM   | UM  | UM  | UM  | UM  | mCHH | UM  |
| AT4G34138 | UM   | UM   | UM  | UM  | UM  | UM  | mCHH | UM  |
| AT4G34140 | UM   | UM   | UM  | UM  | UM  | UM  | mCHH | UM  |
| AT4G34150 | UM   | UM   | UM  | UM  | UM  | UM  | UM   | UM  |
| AT4G34160 | UM   | UM   | UM  | UM  | UM  | UM  | mCHH | UM  |
| AT4G34170 | UM   | UM   | UM  | UM  | UM  | UM  | UM   | UM  |
| AT4G34180 | UM   | UM   | UM  | UM  | UM  | UM  | UM   | UM  |
| AT4G34190 | UM   | UM   | UM  | UM  | UM  | UM  | mCHH | UM  |
| AT4G34200 | UM   | UM   | UM  | UM  | UM  | UM  | UM   | UM  |
| AT4G34210 | UM   | UM   | UM  | UM  | UM  | UM  | UM   | UM  |
| AT4G34215 | UM   | UM   | UM  | UM  | UM  | UM  | UM   | UM  |
| AT4G34220 | UM   | UM   | UM  | UM  | UM  | UM  | mCHH | UM  |
| AT4G34230 | UM   | UM   | UM  | UM  | UM  | UM  | UM   | UM  |
| AT4G34240 | UM   | UM   | UM  | UM  | UM  | UM  | mCHH | UM  |
| AT4G34250 | UM   | UM   | UM  | UM  | UM  | UM  | UM   | UM  |
| AT4G34260 | UM   | UM   | UM  | UM  | UM  | UM  | mCHH | UM  |
| AT4G34265 | UM   | UM   | UM  | UM  | UM  | UM  | UM   | UM  |





|           |     |      |     |     |     |     |      |     |
|-----------|-----|------|-----|-----|-----|-----|------|-----|
| AT4G35170 | UM  | UM   | UM  | UM  | UM  | UM  | mCHH | UM  |
| AT4G35180 | UM  | UM   | UM  | UM  | UM  | UM  | mCHH | UM  |
| AT4G35190 | UM  | UM   | UM  | UM  | UM  | UM  | UM   | UM  |
| AT4G35200 | UM  | UM   | UM  | UM  | UM  | UM  | mCHH | UM  |
| AT4G35210 | UM  | UM   | UM  | UM  | UM  | UM  | mCHH | UM  |
| AT4G35220 | UM  | UM   | UM  | UM  | UM  | UM  | UM   | UM  |
| AT4G35230 | gbM | gbM  | gbM | gbM | gbM | gbM | mCHH | gbM |
| AT4G35240 | UM  | UM   | UM  | UM  | UM  | UM  | mCHH | UM  |
| AT4G35250 | UM  | UM   | UM  | UM  | UM  | UM  | mCHH | UM  |
| AT4G35260 | UM  | UM   | UM  | UM  | UM  | UM  | UM   | UM  |
| AT4G35263 | UM  | UM   | UM  | UM  | UM  | UM  | UM   | UM  |
| AT4G35270 | gbM | gbM  | gbM | gbM | gbM | gbM | mCHH | UM  |
| AT4G35280 | UM  | UM   | UM  | UM  | UM  | UM  | UM   | UM  |
| AT4G35290 | gbM | gbM  | gbM | gbM | gbM | gbM | mCHH | UM  |
| AT4G35295 | UM  | UM   | UM  | UM  | UM  | UM  | UM   | UM  |
| AT4G35300 | gbM | gbM  | gbM | gbM | gbM | gbM | gbM  | gbM |
| AT4G35310 | UM  | UM   | UM  | UM  | UM  | UM  | UM   | UM  |
| AT4G35320 | UM  | UM   | UM  | UM  | UM  | UM  | UM   | UM  |
| AT4G35335 | UM  | UM   | UM  | UM  | UM  | UM  | mCHH | UM  |
| AT4G35350 | UM  | UM   | UM  | UM  | UM  | UM  | UM   | UM  |
| AT4G35360 | UM  | UM   | UM  | UM  | UM  | UM  | UM   | UM  |
| AT4G35370 | UM  | UM   | UM  | UM  | UM  | UM  | mCHH | UM  |
| AT4G35380 | UM  | UM   | UM  | UM  | UM  | UM  | mCHH | UM  |
| AT4G35390 | UM  | UM   | UM  | UM  | UM  | UM  | UM   | UM  |
| AT4G35410 | UM  | UM   | UM  | UM  | UM  | UM  | UM   | UM  |
| AT4G35420 | UM  | UM   | UM  | UM  | UM  | UM  | mCHH | UM  |
| AT4G35430 | UM  | UM   | UM  | UM  | UM  | UM  | UM   | UM  |
| AT4G35440 | UM  | UM   | UM  | UM  | UM  | UM  | mCHH | UM  |
| AT4G35450 | UM  | UM   | UM  | UM  | UM  | UM  | UM   | UM  |
| AT4G35460 | UM  | UM   | UM  | UM  | UM  | UM  | mCHH | UM  |
| AT4G35470 | UM  | UM   | UM  | UM  | UM  | UM  | mCHH | UM  |
| AT4G35480 | UM  | UM   | UM  | UM  | UM  | UM  | UM   | UM  |
| AT4G35490 | UM  | UM   | UM  | UM  | UM  | UM  | UM   | UM  |
| AT4G35500 | UM  | UM   | UM  | UM  | UM  | UM  | mCHH | UM  |
| AT4G35510 | UM  | UM   | UM  | UM  | UM  | UM  | UM   | UM  |
| AT4G35519 | UM  | UM   | UM  | UM  | UM  | UM  | UM   | UM  |
| AT4G35520 | gbM | mCHH | gbM | UM  | UM  | UM  | mCHH | UM  |
| AT4G35530 | UM  | UM   | UM  | UM  | UM  | UM  | mCHH | UM  |
| AT4G35540 | UM  | UM   | UM  | UM  | UM  | UM  | mCHH | UM  |
| AT4G35550 | UM  | UM   | UM  | UM  | UM  | UM  | UM   | UM  |
| AT4G35560 | UM  | UM   | UM  | UM  | UM  | UM  | mCHH | UM  |
| AT4G35570 | UM  | UM   | UM  | UM  | UM  | UM  | UM   | UM  |
| AT4G35580 | UM  | mCHH | UM  | UM  | UM  | UM  | mCHH | UM  |
| AT4G35589 | UM  | UM   | UM  | UM  | UM  | UM  | UM   | UM  |
| AT4G35590 | UM  | UM   | UM  | UM  | UM  | UM  | mCHH | UM  |
| AT4G35600 | UM  | UM   | UM  | UM  | UM  | UM  | mCHH | UM  |
| AT4G35610 | UM  | UM   | UM  | UM  | UM  | UM  | UM   | UM  |
| AT4G35620 | UM  | UM   | UM  | UM  | UM  | UM  | mCHH | UM  |

|           |     |      |      |     |     |     |      |     |
|-----------|-----|------|------|-----|-----|-----|------|-----|
| AT4G35630 | UM  | UM   | UM   | UM  | UM  | UM  | UM   | UM  |
| AT4G35640 | UM  | UM   | UM   | UM  | UM  | UM  | UM   | UM  |
| AT4G35650 | UM  | UM   | UM   | UM  | UM  | UM  | UM   | UM  |
| AT4G35655 | UM  | UM   | UM   | UM  | UM  | UM  | UM   | UM  |
| AT4G35660 | UM  | UM   | UM   | UM  | UM  | UM  | UM   | UM  |
| AT4G35670 | UM  | UM   | UM   | UM  | UM  | UM  | mCHH | UM  |
| AT4G35680 | UM  | UM   | UM   | UM  | UM  | UM  | mCHH | UM  |
| AT4G35690 | UM  | UM   | UM   | UM  | UM  | UM  | UM   | UM  |
| AT4G35700 | UM  | UM   | UM   | UM  | UM  | UM  | UM   | UM  |
| AT4G35710 | UM  | UM   | UM   | UM  | UM  | UM  | UM   | UM  |
| AT4G35720 | UM  | UM   | UM   | UM  | UM  | UM  | mCHH | UM  |
| AT4G35725 | UM  | UM   | UM   | UM  | UM  | UM  | UM   | UM  |
| AT4G35730 | UM  | UM   | UM   | UM  | UM  | UM  | mCHH | UM  |
| AT4G35733 | UM  | UM   | UM   | UM  | UM  | UM  | mCHH | UM  |
| AT4G35740 | UM  | UM   | UM   | UM  | UM  | UM  | mCHH | UM  |
| AT4G35750 | UM  | UM   | UM   | UM  | UM  | UM  | UM   | UM  |
| AT4G35760 | UM  | UM   | UM   | UM  | UM  | UM  | mCHH | UM  |
| AT4G35770 | UM  | UM   | UM   | UM  | UM  | UM  | UM   | UM  |
| AT4G35780 | UM  | UM   | UM   | UM  | UM  | UM  | UM   | UM  |
| AT4G35783 | UM  | UM   | UM   | UM  | UM  | UM  | UM   | UM  |
| AT4G35785 | gbM | gbM  | gbM  | gbM | gbM | UM  | mCHH | gbM |
| AT4G35790 | UM  | UM   | UM   | UM  | UM  | UM  | mCHH | UM  |
| AT4G35800 | gbM | gbM  | gbM  | gbM | gbM | gbM | mCHH | gbM |
| AT4G35810 | UM  | UM   | UM   | UM  | UM  | UM  | UM   | UM  |
| AT4G35820 | UM  | UM   | UM   | UM  | UM  | UM  | UM   | UM  |
| AT4G35830 | gbM | gbM  | gbM  | gbM | gbM | gbM | mCHH | gbM |
| AT4G35837 | UM  | UM   | UM   | UM  | UM  | UM  | UM   | UM  |
| AT4G35840 | UM  | UM   | UM   | UM  | UM  | UM  | mCHH | UM  |
| AT4G35850 | UM  | UM   | UM   | UM  | UM  | UM  | mCHH | UM  |
| AT4G35860 | UM  | UM   | UM   | UM  | UM  | UM  | mCHH | UM  |
| AT4G35870 | UM  | UM   | UM   | UM  | UM  | UM  | mCHH | UM  |
| AT4G35880 | UM  | UM   | UM   | UM  | UM  | UM  | mCHH | UM  |
| AT4G35890 | UM  | UM   | UM   | UM  | UM  | UM  | mCHH | UM  |
| AT4G35900 | UM  | UM   | UM   | UM  | UM  | UM  | UM   | UM  |
| AT4G35905 | UM  | UM   | UM   | UM  | UM  | UM  | UM   | UM  |
| AT4G35910 | gbM | gbM  | gbM  | gbM | UM  | UM  | gbM  | UM  |
| AT4G35920 | UM  | UM   | UM   | UM  | UM  | UM  | mCHH | UM  |
| AT4G35930 | UM  | UM   | UM   | UM  | UM  | UM  | UM   | UM  |
| AT4G35940 | gbM | mCHH | mCHH | UM  | UM  | UM  | mCHH | UM  |
| AT4G35950 | UM  | UM   | UM   | UM  | UM  | UM  | UM   | UM  |
| AT4G35970 | UM  | UM   | UM   | UM  | UM  | UM  | mCHH | UM  |
| AT4G35980 | UM  | UM   | UM   | UM  | UM  | UM  | UM   | UM  |
| AT4G35985 | UM  | UM   | UM   | UM  | UM  | UM  | mCHH | UM  |
| AT4G35987 | UM  | UM   | UM   | UM  | UM  | UM  | mCHH | UM  |
| AT4G36000 | UM  | UM   | UM   | UM  | UM  | UM  | UM   | UM  |
| AT4G36010 | UM  | UM   | UM   | UM  | UM  | UM  | UM   | UM  |
| AT4G36020 | UM  | UM   | UM   | UM  | UM  | UM  | UM   | UM  |
| AT4G36030 | UM  | UM   | UM   | UM  | UM  | UM  | mCHH | UM  |





|           |      |      |      |      |      |      |      |      |
|-----------|------|------|------|------|------|------|------|------|
| AT4G36540 | UM   | mCHH | UM   | UM   | UM   | UM   | mCHH | UM   |
| AT4G36550 | gbM  | gbM  | gbM  | gbM  | gbM  | UM   | mCHH | UM   |
| AT4G36560 | UM   |
| AT4G36570 | UM   |
| AT4G36580 | gbM  | gbM  | gbM  | UM   | UM   | UM   | mCHH | UM   |
| AT4G36590 | UM   | UM   | UM   | UM   | UM   | UM   | mCHH | UM   |
| AT4G36600 | UM   |
| AT4G36610 | UM   |
| AT4G36620 | UM   |
| AT4G36630 | UM   | UM   | UM   | UM   | UM   | UM   | mCHH | UM   |
| AT4G36640 | UM   | UM   | UM   | UM   | UM   | UM   | mCHH | UM   |
| AT4G36650 | UM   |
| AT4G36660 | UM   |
| AT4G36670 | UM   |
| AT4G36680 | UM   | UM   | UM   | UM   | UM   | UM   | mCHH | UM   |
| AT4G36690 | UM   | UM   | UM   | UM   | UM   | UM   | mCHH | UM   |
| AT4G36700 | UM   | UM   | UM   | UM   | UM   | UM   | mCHH | UM   |
| AT4G36710 | UM   |
| AT4G36720 | UM   |
| AT4G36730 | gbM  | gbM  | gbM  | UM   | UM   | gbM  | mCHH | UM   |
| AT4G36740 | UM   |
| AT4G36750 | UM   |
| AT4G36760 | gbM  | gbM  | gbM  | gbM  | gbM  | gbM  | mCHH | UM   |
| AT4G36770 | UM   | UM   | UM   | UM   | UM   | UM   | mCHH | UM   |
| AT4G36780 | UM   |
| AT4G36790 | UM   | UM   | UM   | UM   | UM   | UM   | mCHH | UM   |
| AT4G36791 | UM   |
| AT4G36800 | UM   |
| AT4G36810 | UM   |
| AT4G36820 | UM   |
| AT4G36830 | UM   |
| AT4G36840 | UM   |
| AT4G36850 | UM   | UM   | UM   | UM   | UM   | UM   | mCHH | UM   |
| AT4G36860 | UM   | UM   | UM   | UM   | UM   | UM   | mCHH | UM   |
| AT4G36870 | UM   | UM   | UM   | UM   | UM   | UM   | mCHH | UM   |
| AT4G36880 | UM   |
| AT4G36890 | UM   | UM   | UM   | UM   | UM   | UM   | mCHH | UM   |
| AT4G36900 | UM   |
| AT4G36910 | UM   |
| AT4G36920 | UM   | UM   | UM   | UM   | UM   | UM   | mCHH | UM   |
| AT4G36925 | mCHH | mCHH | mCHH | mCHG | mCHH | mCHH | mCHH | mCHH |
| AT4G36930 | UM   |
| AT4G36940 | gbM  | gbM  | gbM  | UM   | UM   | gbM  | mCHH | UM   |
| AT4G36945 | UM   | UM   | UM   | UM   | UM   | UM   | mCHH | UM   |
| AT4G36950 | UM   |
| AT4G36960 | gbM  | gbM  | gbM  | UM   | UM   | UM   | mCHH | gbM  |
| AT4G36970 | UM   | UM   | UM   | UM   | UM   | UM   | mCHH | UM   |
| AT4G36980 | gbM  | gbM  | gbM  | gbM  | UM   | UM   | mCHH | UM   |

|           |     |     |     |     |     |     |      |     |
|-----------|-----|-----|-----|-----|-----|-----|------|-----|
| AT4G36988 | UM   | UM  |
| AT4G36990 | UM   | UM  |
| AT4G37000 | UM   | UM  |
| AT4G37010 | UM   | UM  |
| AT4G37020 | UM  | UM  | UM  | UM  | UM  | UM  | mCHH | UM  |
| AT4G37022 | UM   | UM  |
| AT4G37030 | UM  | UM  | UM  | UM  | UM  | UM  | mCHH | UM  |
| AT4G37040 | gbM | gbM | UM  | UM  | UM  | UM  | mCHH | UM  |
| AT4G37050 | UM  | UM  | UM  | UM  | UM  | UM  | mCHH | UM  |
| AT4G37060 | UM  | UM  | UM  | UM  | UM  | UM  | mCHH | UM  |
| AT4G37070 | UM  | UM  | UM  | UM  | UM  | UM  | mCHH | UM  |
| AT4G37080 | UM  | UM  | UM  | UM  | UM  | UM  | mCHH | UM  |
| AT4G37090 | UM   | UM  |
| AT4G37095 | UM   | UM  |
| AT4G37100 | gbM | gbM | gbM | gbM | gbM | gbM | mCHH | gbM |
| AT4G37110 | UM  | UM  | UM  | UM  | UM  | UM  | mCHH | UM  |
| AT4G37120 | UM  | UM  | UM  | UM  | UM  | UM  | mCHH | UM  |
| AT4G37130 | UM   | UM  |
| AT4G37140 | UM   | UM  |
| AT4G37150 | UM  | UM  | UM  | UM  | UM  | UM  | mCHH | UM  |
| AT4G37160 | UM   | UM  |
| AT4G37170 | UM  | UM  | UM  | UM  | UM  | UM  | mCHH | UM  |
| AT4G37180 | UM  | UM  | UM  | UM  | UM  | UM  | mCHH | UM  |
| AT4G37190 | gbM | gbM | gbM | gbM | gbM | gbM | mCHH | gbM |
| AT4G37200 | UM   | UM  |
| AT4G37210 | UM   | UM  |
| AT4G37220 | UM   | UM  |
| AT4G37230 | UM   | UM  |
| AT4G37235 | UM   | UM  |
| AT4G37240 | UM   | UM  |
| AT4G37250 | UM  | UM  | UM  | UM  | UM  | UM  | mCHH | UM  |
| AT4G37260 | UM   | UM  |
| AT4G37270 | UM  | UM  | UM  | UM  | UM  | UM  | mCHH | UM  |
| AT4G37280 | UM   | UM  |
| AT4G37290 | UM   | UM  |
| AT4G37295 | UM   | UM  |
| AT4G37300 | UM   | UM  |
| AT4G37310 | UM   | UM  |
| AT4G37320 | UM   | UM  |
| AT4G37330 | UM   | UM  |
| AT4G37340 | UM   | UM  |
| AT4G37360 | UM   | UM  |
| AT4G37370 | UM   | UM  |
| AT4G37380 | UM  | UM  | UM  | UM  | UM  | UM  | mCHH | UM  |
| AT4G37390 | UM   | UM  |
| AT4G37400 | UM   | UM  |
| AT4G37410 | UM   | UM  |
| AT4G37420 | UM   | UM  |

|           |      |      |      |     |     |     |      |     |
|-----------|------|------|------|-----|-----|-----|------|-----|
| AT4G37430 | UM   | UM   | UM   | UM  | UM  | UM  | UM   | UM  |
| AT4G37440 | gbM  | mCHG | gbM  | gbM | gbM | gbM | mCHH | gbM |
| AT4G37445 | UM   | UM   | UM   | UM  | UM  | UM  | UM   | UM  |
| AT4G37450 | UM   | UM   | UM   | UM  | UM  | UM  | UM   | UM  |
| AT4G37460 | UM   | mCHH | gbM  | UM  | UM  | UM  | mCHH | UM  |
| AT4G37470 | UM   | UM   | UM   | UM  | UM  | UM  | UM   | UM  |
| AT4G37480 | UM   | UM   | UM   | UM  | UM  | UM  | mCHH | UM  |
| AT4G37483 | UM   | UM   | UM   | UM  | UM  | UM  | UM   | UM  |
| AT4G37490 | UM   | UM   | UM   | UM  | UM  | UM  | mCHH | UM  |
| AT4G37500 | UM   | UM   | UM   | UM  | UM  | UM  | UM   | UM  |
| AT4G37510 | UM   | UM   | UM   | UM  | UM  | UM  | mCHH | UM  |
| AT4G37520 | UM   | UM   | UM   | UM  | UM  | UM  | UM   | UM  |
| AT4G37530 | UM   | UM   | UM   | UM  | UM  | UM  | UM   | UM  |
| AT4G37540 | UM   | UM   | UM   | UM  | UM  | UM  | UM   | UM  |
| AT4G37550 | UM   | UM   | UM   | UM  | UM  | UM  | UM   | UM  |
| AT4G37560 | UM   | UM   | UM   | UM  | UM  | UM  | mCHH | UM  |
| AT4G37580 | UM   | UM   | UM   | UM  | UM  | UM  | UM   | UM  |
| AT4G37590 | gbM  | gbM  | gbM  | UM  | UM  | gbM | mCHH | UM  |
| AT4G37608 | UM   | UM   | UM   | UM  | UM  | UM  | mCHH | UM  |
| AT4G37610 | UM   | UM   | UM   | UM  | UM  | UM  | mCHH | UM  |
| AT4G37630 | UM   | UM   | UM   | UM  | UM  | UM  | mCHH | UM  |
| AT4G37640 | gbM  | gbM  | gbM  | UM  | UM  | UM  | mCHH | UM  |
| AT4G37650 | UM   | UM   | UM   | UM  | UM  | UM  | UM   | UM  |
| AT4G37660 | UM   | UM   | UM   | UM  | UM  | UM  | UM   | UM  |
| AT4G37670 | UM   | UM   | UM   | UM  | UM  | UM  | mCHH | UM  |
| AT4G37680 | UM   | UM   | UM   | UM  | UM  | UM  | gbM  | UM  |
| AT4G37682 | UM   | UM   | UM   | UM  | UM  | UM  | UM   | UM  |
| AT4G37685 | UM   | UM   | UM   | UM  | UM  | UM  | UM   | UM  |
| AT4G37690 | UM   | UM   | UM   | UM  | UM  | UM  | mCHH | UM  |
| AT4G37700 | UM   | UM   | UM   | UM  | UM  | UM  | UM   | UM  |
| AT4G37710 | UM   | UM   | UM   | UM  | UM  | UM  | UM   | UM  |
| AT4G37720 | UM   | UM   | UM   | UM  | UM  | UM  | UM   | UM  |
| AT4G37730 | UM   | UM   | UM   | UM  | UM  | UM  | UM   | UM  |
| AT4G37740 | UM   | UM   | UM   | UM  | UM  | UM  | UM   | UM  |
| AT4G37750 | UM   | UM   | UM   | UM  | UM  | UM  | mCHH | UM  |
| AT4G37760 | UM   | UM   | UM   | UM  | UM  | UM  | mCHH | UM  |
| AT4G37770 | UM   | UM   | UM   | UM  | UM  | UM  | UM   | UM  |
| AT4G37780 | UM   | UM   | UM   | UM  | UM  | UM  | mCHH | UM  |
| AT4G37790 | UM   | UM   | UM   | UM  | UM  | UM  | mCHH | UM  |
| AT4G37800 | UM   | UM   | UM   | UM  | UM  | UM  | mCHH | UM  |
| AT4G37810 | UM   | UM   | UM   | UM  | UM  | UM  | mCHH | UM  |
| AT4G37820 | mCHH | mCHH | mCHH | UM  | UM  | UM  | mCHH | UM  |
| AT4G37830 | UM   | UM   | UM   | UM  | UM  | UM  | UM   | UM  |
| AT4G37840 | UM   | UM   | UM   | UM  | UM  | UM  | mCHH | UM  |
| AT4G37850 | UM   | UM   | UM   | UM  | UM  | UM  | UM   | UM  |
| AT4G37860 | UM   | UM   | UM   | UM  | UM  | UM  | mCHH | UM  |
| AT4G37870 | UM   | UM   | UM   | UM  | UM  | UM  | mCHH | UM  |
| AT4G37880 | gbM  | gbM  | UM   | UM  | UM  | UM  | mCHH | UM  |



|           |      |      |      |     |     |     |      |     |
|-----------|------|------|------|-----|-----|-----|------|-----|
| AT4G38350 | gbM  | mCHH | gbM  | gbM | gbM | gbM | mCHH | gbM |
| AT4G38360 | gbM  | mCHH | gbM  | UM  | UM  | UM  | mCHH | UM  |
| AT4G38370 | UM   | UM   | UM   | UM  | UM  | UM  | UM   | UM  |
| AT4G38380 | gbM  | gbM  | UM   | UM  | gbM | gbM | gbM  | UM  |
| AT4G38390 | UM   | UM   | UM   | UM  | UM  | UM  | mCHH | UM  |
| AT4G38400 | UM   | UM   | UM   | UM  | UM  | UM  | UM   | UM  |
| AT4G38401 | UM   | UM   | UM   | UM  | UM  | UM  | UM   | UM  |
| AT4G38405 | UM   | UM   | UM   | UM  | UM  | UM  | UM   | UM  |
| AT4G38410 | UM   | mCHH | UM   | UM  | UM  | UM  | UM   | UM  |
| AT4G38420 | UM   | UM   | UM   | UM  | UM  | UM  | UM   | UM  |
| AT4G38430 | UM   | UM   | UM   | UM  | UM  | UM  | UM   | UM  |
| AT4G38440 | gbM  | gbM  | gbM  | gbM | gbM | gbM | mCHH | gbM |
| AT4G38460 | UM   | UM   | UM   | UM  | UM  | UM  | UM   | UM  |
| AT4G38470 | UM   | UM   | UM   | UM  | UM  | UM  | mCHH | UM  |
| AT4G38480 | UM   | UM   | UM   | UM  | UM  | UM  | mCHH | UM  |
| AT4G38490 | UM   | UM   | UM   | UM  | UM  | UM  | UM   | UM  |
| AT4G38495 | UM   | UM   | UM   | UM  | UM  | UM  | UM   | UM  |
| AT4G38500 | UM   | UM   | UM   | UM  | UM  | UM  | UM   | UM  |
| AT4G38510 | mCHH | mCHH | mCHG | gbM | gbM | gbM | mCHH | gbM |
| AT4G38520 | UM   | UM   | UM   | UM  | UM  | UM  | UM   | UM  |
| AT4G38530 | UM   | UM   | UM   | UM  | UM  | UM  | mCHH | UM  |
| AT4G38540 | UM   | UM   | UM   | UM  | UM  | UM  | UM   | UM  |
| AT4G38550 | UM   | UM   | UM   | UM  | UM  | UM  | gbM  | UM  |
| AT4G38560 | gbM  | gbM  | gbM  | gbM | gbM | gbM | mCHH | gbM |
| AT4G38570 | UM   | mCHH | UM   | UM  | UM  | UM  | mCHH | UM  |
| AT4G38580 | UM   | UM   | UM   | UM  | UM  | UM  | UM   | UM  |
| AT4G38590 | UM   | UM   | UM   | UM  | UM  | UM  | mCHH | UM  |
| AT4G38600 | gbM  | gbM  | gbM  | gbM | gbM | gbM | mCHH | gbM |
| AT4G38620 | UM   | UM   | UM   | UM  | UM  | UM  | UM   | UM  |
| AT4G38630 | UM   | UM   | UM   | UM  | UM  | UM  | UM   | UM  |
| AT4G38640 | UM   | UM   | UM   | UM  | UM  | UM  | mCHH | UM  |
| AT4G38650 | UM   | UM   | UM   | UM  | UM  | UM  | mCHH | UM  |
| AT4G38660 | UM   | UM   | UM   | UM  | UM  | UM  | UM   | UM  |
| AT4G38670 | UM   | UM   | UM   | UM  | UM  | UM  | UM   | UM  |
| AT4G38680 | UM   | UM   | UM   | UM  | UM  | UM  | UM   | UM  |
| AT4G38690 | UM   | UM   | UM   | UM  | UM  | UM  | UM   | UM  |
| AT4G38700 | UM   | UM   | UM   | UM  | UM  | UM  | UM   | UM  |
| AT4G38710 | UM   | UM   | UM   | UM  | UM  | UM  | UM   | UM  |
| AT4G38730 | UM   | UM   | UM   | UM  | UM  | UM  | mCHH | UM  |
| AT4G38740 | UM   | UM   | UM   | UM  | UM  | UM  | UM   | UM  |
| AT4G38760 | gbM  | mCHH | gbM  | gbM | gbM | gbM | mCHH | gbM |
| AT4G38770 | UM   | UM   | UM   | UM  | UM  | UM  | UM   | UM  |
| AT4G38780 | UM   | UM   | UM   | UM  | UM  | UM  | mCHH | UM  |
| AT4G38781 | UM   | UM   | UM   | UM  | UM  | UM  | UM   | UM  |
| AT4G38790 | UM   | UM   | UM   | UM  | UM  | UM  | mCHH | UM  |
| AT4G38800 | UM   | UM   | UM   | UM  | UM  | UM  | mCHH | UM  |
| AT4G38810 | UM   | UM   | UM   | UM  | UM  | UM  | mCHH | UM  |
| AT4G38820 | UM   | UM   | UM   | UM  | UM  | UM  | UM   | UM  |

|           |      |      |      |     |     |     |      |     |
|-----------|------|------|------|-----|-----|-----|------|-----|
| AT4G38825 | UM   | UM   | UM   | UM  | UM  | UM  | UM   | UM  |
| AT4G38830 | UM   | UM   | UM   | UM  | UM  | UM  | UM   | UM  |
| AT4G38840 | UM   | UM   | UM   | UM  | UM  | UM  | UM   | UM  |
| AT4G38850 | UM   | UM   | UM   | UM  | UM  | UM  | mCHH | UM  |
| AT4G38860 | UM   | UM   | UM   | UM  | UM  | UM  | UM   | UM  |
| AT4G38870 | UM   | UM   | UM   | UM  | UM  | UM  | mCHH | UM  |
| AT4G38880 | UM   | UM   | UM   | UM  | UM  | UM  | UM   | UM  |
| AT4G38890 | UM   | gbM  | UM   | gbM | UM  | UM  | mCHH | UM  |
| AT4G38900 | UM   | UM   | UM   | UM  | UM  | UM  | mCHH | UM  |
| AT4G38910 | UM   | UM   | UM   | UM  | UM  | UM  | UM   | UM  |
| AT4G38920 | UM   | UM   | UM   | UM  | UM  | UM  | UM   | UM  |
| AT4G38930 | UM   | UM   | UM   | UM  | UM  | UM  | mCHH | UM  |
| AT4G38940 | UM   | UM   | UM   | UM  | UM  | UM  | UM   | UM  |
| AT4G38950 | gbM  | gbM  | gbM  | UM  | UM  | UM  | mCHH | UM  |
| AT4G38960 | UM   | UM   | UM   | UM  | UM  | UM  | UM   | UM  |
| AT4G38970 | UM   | UM   | UM   | UM  | UM  | UM  | UM   | UM  |
| AT4G38980 | UM   | UM   | UM   | UM  | UM  | UM  | UM   | UM  |
| AT4G38990 | UM   | UM   | UM   | UM  | UM  | UM  | UM   | UM  |
| AT4G39000 | UM   | UM   | UM   | UM  | UM  | UM  | UM   | UM  |
| AT4G39010 | UM   | UM   | UM   | UM  | UM  | UM  | UM   | UM  |
| AT4G39020 | mCHH | mCHH | mCHH | UM  | UM  | UM  | mCHH | gbM |
| AT4G39030 | UM   | UM   | UM   | UM  | UM  | UM  | mCHH | UM  |
| AT4G39040 | UM   | UM   | UM   | UM  | UM  | UM  | UM   | UM  |
| AT4G39050 | gbM  | mCHH | UM   | UM  | UM  | UM  | mCHH | UM  |
| AT4G39060 | UM   | mCHH | UM   | UM  | UM  | UM  | mCHH | UM  |
| AT4G39070 | UM   | UM   | UM   | UM  | UM  | UM  | UM   | UM  |
| AT4G39080 | gbM  | mCHH | gbM  | gbM | gbM | gbM | mCHH | gbM |
| AT4G39090 | UM   | UM   | UM   | UM  | UM  | UM  | UM   | UM  |
| AT4G39100 | UM   | UM   | UM   | UM  | UM  | UM  | UM   | UM  |
| AT4G39110 | gbM  | gbM  | gbM  | gbM | gbM | gbM | mCHH | gbM |
| AT4G39120 | UM   | UM   | UM   | UM  | UM  | UM  | UM   | UM  |
| AT4G39130 | UM   | UM   | UM   | UM  | UM  | UM  | UM   | UM  |
| AT4G39140 | UM   | UM   | UM   | UM  | UM  | UM  | mCHH | UM  |
| AT4G39150 | UM   | UM   | UM   | UM  | UM  | UM  | UM   | UM  |
| AT4G39160 | UM   | UM   | UM   | UM  | UM  | UM  | mCHH | UM  |
| AT4G39170 | gbM  | gbM  | gbM  | UM  | gbM | gbM | mCHH | gbM |
| AT4G39180 | UM   | UM   | UM   | UM  | UM  | UM  | mCHH | UM  |
| AT4G39190 | UM   | UM   | UM   | UM  | UM  | UM  | mCHH | UM  |
| AT4G39200 | UM   | UM   | UM   | UM  | UM  | UM  | UM   | UM  |
| AT4G39210 | UM   | UM   | UM   | UM  | UM  | UM  | mCHH | UM  |
| AT4G39220 | UM   | UM   | UM   | UM  | UM  | UM  | UM   | UM  |
| AT4G39230 | UM   | UM   | UM   | UM  | UM  | UM  | UM   | UM  |
| AT4G39235 | UM   | UM   | UM   | UM  | UM  | UM  | UM   | UM  |
| AT4G39240 | UM   | UM   | UM   | UM  | UM  | UM  | UM   | UM  |
| AT4G39250 | UM   | UM   | UM   | UM  | UM  | UM  | UM   | UM  |
| AT4G39260 | UM   | UM   | UM   | UM  | UM  | UM  | UM   | UM  |
| AT4G39270 | UM   | UM   | UM   | UM  | UM  | UM  | mCHH | UM  |
| AT4G39280 | gbM  | mCHG | gbM  | UM  | UM  | UM  | mCHH | gbM |

|           |     |      |     |     |     |     |      |     |
|-----------|-----|------|-----|-----|-----|-----|------|-----|
| AT4G39290 | UM  | UM   | UM  | UM  | UM  | UM  | UM   | UM  |
| AT4G39300 | UM  | UM   | UM  | UM  | UM  | UM  | UM   | UM  |
| AT4G39320 | UM  | UM   | UM  | UM  | UM  | UM  | UM   | UM  |
| AT4G39330 | UM  | UM   | UM  | UM  | UM  | UM  | mCHH | UM  |
| AT4G39340 | UM  | UM   | UM  | UM  | UM  | UM  | UM   | UM  |
| AT4G39350 | UM  | mCHH | UM  | UM  | UM  | UM  | mCHH | UM  |
| AT4G39360 | UM  | UM   | UM  | UM  | UM  | UM  | UM   | UM  |
| AT4G39370 | UM  | UM   | UM  | UM  | UM  | UM  | mCHH | UM  |
| AT4G39380 | UM  | UM   | UM  | UM  | UM  | UM  | mCHH | UM  |
| AT4G39390 | UM  | UM   | UM  | UM  | UM  | UM  | mCHH | UM  |
| AT4G39400 | UM  | UM   | UM  | UM  | UM  | UM  | mCHH | UM  |
| AT4G39403 | UM  | UM   | UM  | UM  | UM  | UM  | UM   | UM  |
| AT4G39410 | UM  | UM   | UM  | UM  | UM  | UM  | UM   | UM  |
| AT4G39420 | gbM | mCHH | gbM | gbM | gbM | gbM | mCHH | gbM |
| AT4G39460 | UM  | UM   | UM  | UM  | UM  | UM  | mCHH | UM  |
| AT4G39470 | UM  | UM   | UM  | UM  | UM  | UM  | mCHH | UM  |
| AT4G39480 | UM  | UM   | UM  | UM  | UM  | UM  | UM   | UM  |
| AT4G39490 | UM  | UM   | UM  | UM  | UM  | UM  | mCHH | UM  |
| AT4G39500 | UM  | UM   | UM  | UM  | UM  | UM  | mCHH | UM  |
| AT4G39510 | UM  | UM   | UM  | UM  | UM  | UM  | mCHH | UM  |
| AT4G39520 | gbM | gbM  | gbM | gbM | gbM | gbM | mCHH | gbM |
| AT4G39530 | UM  | UM   | UM  | UM  | UM  | UM  | mCHH | UM  |
| AT4G39540 | UM  | UM   | UM  | UM  | UM  | UM  | mCHH | UM  |
| AT4G39550 | UM  | UM   | UM  | UM  | UM  | UM  | mCHH | UM  |
| AT4G39560 | UM  | UM   | UM  | UM  | UM  | UM  | UM   | UM  |
| AT4G39570 | UM  | UM   | UM  | UM  | UM  | UM  | UM   | UM  |
| AT4G39580 | UM  | UM   | UM  | UM  | UM  | UM  | UM   | UM  |
| AT4G39590 | UM  | UM   | UM  | UM  | UM  | UM  | UM   | UM  |
| AT4G39600 | UM  | UM   | UM  | UM  | UM  | UM  | UM   | UM  |
| AT4G39610 | UM  | UM   | UM  | UM  | UM  | UM  | UM   | UM  |
| AT4G39620 | UM  | mCHH | UM  | UM  | UM  | UM  | mCHH | UM  |
| AT4G39630 | UM  | UM   | UM  | UM  | UM  | UM  | mCHH | UM  |
| AT4G39640 | UM  | UM   | UM  | UM  | UM  | UM  | mCHH | UM  |
| AT4G39650 | UM  | UM   | UM  | UM  | UM  | UM  | mCHH | UM  |
| AT4G39660 | UM  | UM   | UM  | UM  | UM  | UM  | mCHH | UM  |
| AT4G39670 | UM  | UM   | UM  | UM  | UM  | UM  | UM   | UM  |
| AT4G39675 | UM  | UM   | UM  | UM  | UM  | UM  | UM   | UM  |
| AT4G39680 | gbM | gbM  | gbM | UM  | UM  | gbM | mCHH | gbM |
| AT4G39690 | gbM | gbM  | gbM | UM  | UM  | UM  | mCHH | UM  |
| AT4G39700 | UM  | UM   | UM  | UM  | UM  | UM  | UM   | UM  |
| AT4G39710 | UM  | UM   | UM  | UM  | UM  | UM  | UM   | UM  |
| AT4G39720 | UM  | UM   | UM  | UM  | UM  | UM  | UM   | UM  |
| AT4G39730 | UM  | UM   | UM  | UM  | UM  | UM  | UM   | UM  |
| AT4G39740 | UM  | UM   | UM  | UM  | UM  | UM  | UM   | UM  |
| AT4G39745 | UM  | UM   | UM  | UM  | UM  | UM  | UM   | UM  |
| AT4G39750 | UM  | UM   | UM  | UM  | UM  | UM  | UM   | UM  |
| AT4G39753 | UM  | UM   | UM  | UM  | UM  | UM  | mCHH | UM  |
| AT4G39756 | UM  | UM   | UM  | UM  | UM  | UM  | UM   | UM  |

|           |      |      |      |      |      |      |      |      |
|-----------|------|------|------|------|------|------|------|------|
| AT4G39760 | UM   |
| AT4G39770 | UM   | UM   | UM   | UM   | UM   | UM   | mCHH | UM   |
| AT4G39780 | UM   |
| AT4G39790 | UM   | UM   | UM   | UM   | UM   | UM   | mCHH | UM   |
| AT4G39795 | UM   |
| AT4G39800 | UM   | UM   | UM   | UM   | UM   | UM   | mCHH | UM   |
| AT4G39810 | UM   | UM   | UM   | UM   | UM   | UM   | mCHH | UM   |
| AT4G39820 | UM   |
| AT4G39830 | UM   |
| AT4G39840 | UM   |
| AT4G39850 | gbM  | gbM  | gbM  | gbM  | gbM  | gbM  | mCHH | gbM  |
| AT4G39860 | UM   |
| AT4G39870 | UM   |
| AT4G39880 | UM   |
| AT4G39890 | UM   | UM   | UM   | UM   | UM   | UM   | mCHH | UM   |
| AT4G39900 | UM   | UM   | UM   | UM   | UM   | UM   | mCHH | UM   |
| AT4G39910 | UM   | UM   | UM   | UM   | UM   | UM   | mCHH | UM   |
| AT4G39917 | UM   |
| AT4G39920 | UM   |
| AT4G39925 | UM   |
| AT4G39930 | UM   | UM   | UM   | UM   | UM   | UM   | mCHH | UM   |
| AT4G39940 | UM   |
| AT4G39950 | UM   | UM   | UM   | UM   | UM   | UM   | mCHH | UM   |
| AT4G39952 | UM   | UM   | UM   | UM   | UM   | UM   | mCHH | UM   |
| AT4G39955 | UM   |
| AT4G39960 | gbM  | gbM  | gbM  | gbM  | gbM  | gbM  | mCHH | gbM  |
| AT4G39970 | UM   |
| AT4G39980 | UM   | UM   | UM   | UM   | UM   | UM   | mCHH | UM   |
| AT4G39986 | UM   |
| AT4G39990 | UM   |
| AT4G40000 | gbM  | gbM  | gbM  | gbM  | UM   | gbM  | mCHH | UM   |
| AT4G40010 | UM   | UM   | UM   | UM   | UM   | UM   | mCHH | UM   |
| AT4G40011 | UM   |
| AT4G40020 | mCHH | UM   | UM   | UM   | UM   | UM   | mCHH | UM   |
| AT4G40030 | UM   |
| AT4G40040 | UM   |
| AT4G40042 | UM   |
| AT4G40045 | UM   |
| AT4G40050 | UM   | UM   | UM   | UM   | UM   | UM   | mCHH | UM   |
| AT4G40060 | UM   | UM   | UM   | UM   | UM   | UM   | mCHH | UM   |
| AT4G40070 | UM   |
| AT4G40080 | UM   |
| AT4G40090 | UM   |
| AT4G40100 | mCHH |
| AT5G01010 | UM   |
| AT5G01015 | UM   |
| AT5G01020 | UM   |
| AT5G01030 | UM   |



|           |      |      |      |      |      |      |      |      |
|-----------|------|------|------|------|------|------|------|------|
| AT5G01040 | UM   |
| AT5G01050 | UM   | UM   | UM   | UM   | UM   | UM   | mCHH | UM   |
| AT5G01060 | UM   |
| AT5G01070 | UM   |
| AT5G01075 | UM   |
| AT5G01080 | mCHH |
| AT5G01090 | UM   |
| AT5G01100 | UM   |
| AT5G01110 | gbM  | gbM  | gbM  | UM   | UM   | UM   | gbM  | UM   |
| AT5G01120 | UM   | UM   | UM   | UM   | UM   | UM   | mCHH | UM   |
| AT5G01130 | UM   |
| AT5G01140 | UM   |
| AT5G01150 | UM   |
| AT5G01160 | gbM  | UM   | UM   | UM   | UM   | UM   | gbM  | UM   |
| AT5G01170 | UM   |
| AT5G01180 | UM   |
| AT5G01190 | UM   |
| AT5G01200 | UM   |
| AT5G01210 | UM   |
| AT5G01220 | UM   |
| AT5G01225 | UM   |
| AT5G01230 | UM   |
| AT5G01240 | UM   |
| AT5G01250 | UM   |
| AT5G01260 | UM   |
| AT5G01270 | UM   |
| AT5G01280 | UM   |
| AT5G01290 | UM   |
| AT5G01300 | UM   |
| AT5G01310 | UM   | UM   | UM   | UM   | UM   | UM   | mCHH | UM   |
| AT5G01320 | UM   |
| AT5G01330 | UM   |
| AT5G01340 | UM   |
| AT5G01350 | UM   |
| AT5G01360 | UM   |
| AT5G01370 | UM   |
| AT5G01380 | mCHH | UM   |
| AT5G01390 | UM   |
| AT5G01400 | mCHH | mCHH | UM   | UM   | UM   | UM   | mCHH | UM   |
| AT5G01410 | UM   |
| AT5G01420 | UM   |
| AT5G01430 | gbM  |
| AT5G01440 | mCHH | mCHH | gbM  | UM   | UM   | UM   | mCHH | UM   |
| AT5G01445 | UM   |
| AT5G01450 | UM   |
| AT5G01460 | UM   | mCHH | UM   | UM   | UM   | UM   | UM   | UM   |
| AT5G01470 | UM   |
| AT5G01480 | UM   | UM   | UM   | UM   | UM   | UM   | mCHH | UM   |

|           |     |      |     |    |    |    |      |    |
|-----------|-----|------|-----|----|----|----|------|----|
| AT5G01490 | UM  | UM   | UM  | UM | UM | UM | mCHH | UM |
| AT5G01500 | UM  | UM   | UM  | UM | UM | UM | UM   | UM |
| AT5G01510 | UM  | UM   | UM  | UM | UM | UM | UM   | UM |
| AT5G01520 | UM  | UM   | UM  | UM | UM | UM | UM   | UM |
| AT5G01530 | UM  | UM   | UM  | UM | UM | UM | UM   | UM |
| AT5G01540 | UM  | UM   | UM  | UM | UM | UM | UM   | UM |
| AT5G01550 | UM  | UM   | UM  | UM | UM | UM | UM   | UM |
| AT5G01560 | UM  | UM   | UM  | UM | UM | UM | UM   | UM |
| AT5G01570 | UM  | UM   | UM  | UM | UM | UM | UM   | UM |
| AT5G01580 | UM  | gbM  | UM  | UM | UM | UM | UM   | UM |
| AT5G01590 | UM  | UM   | UM  | UM | UM | UM | UM   | UM |
| AT5G01600 | UM  | UM   | UM  | UM | UM | UM | UM   | UM |
| AT5G01610 | UM  | UM   | UM  | UM | UM | UM | UM   | UM |
| AT5G01620 | UM  | UM   | UM  | UM | UM | UM | mCHH | UM |
| AT5G01630 | UM  | UM   | UM  | UM | UM | UM | UM   | UM |
| AT5G01640 | UM  | UM   | UM  | UM | UM | UM | UM   | UM |
| AT5G01650 | UM  | UM   | UM  | UM | UM | UM | UM   | UM |
| AT5G01660 | UM  | mCHH | UM  | UM | UM | UM | UM   | UM |
| AT5G01670 | UM  | UM   | UM  | UM | UM | UM | UM   | UM |
| AT5G01680 | UM  | UM   | UM  | UM | UM | UM | UM   | UM |
| AT5G01690 | UM  | UM   | UM  | UM | UM | UM | UM   | UM |
| AT5G01700 | UM  | UM   | UM  | UM | UM | UM | mCHH | UM |
| AT5G01710 | UM  | UM   | UM  | UM | UM | UM | UM   | UM |
| AT5G01712 | UM  | UM   | UM  | UM | UM | UM | UM   | UM |
| AT5G01720 | UM  | UM   | UM  | UM | UM | UM | mCHH | UM |
| AT5G01730 | UM  | UM   | UM  | UM | UM | UM | UM   | UM |
| AT5G01734 | UM  | UM   | UM  | UM | UM | UM | UM   | UM |
| AT5G01740 | UM  | UM   | UM  | UM | UM | UM | UM   | UM |
| AT5G01750 | UM  | UM   | UM  | UM | UM | UM | UM   | UM |
| AT5G01760 | UM  | UM   | UM  | UM | UM | UM | UM   | UM |
| AT5G01770 | gbM | mCHH | gbM | UM | UM | UM | gbM  | UM |
| AT5G01780 | UM  | UM   | UM  | UM | UM | UM | UM   | UM |
| AT5G01790 | UM  | UM   | UM  | UM | UM | UM | UM   | UM |
| AT5G01800 | UM  | UM   | UM  | UM | UM | UM | UM   | UM |
| AT5G01810 | UM  | UM   | UM  | UM | UM | UM | UM   | UM |
| AT5G01820 | UM  | UM   | UM  | UM | UM | UM | UM   | UM |
| AT5G01830 | UM  | UM   | UM  | UM | UM | UM | UM   | UM |
| AT5G01840 | UM  | UM   | UM  | UM | UM | UM | UM   | UM |
| AT5G01849 | UM  | UM   | UM  | UM | UM | UM | UM   | UM |
| AT5G01850 | UM  | UM   | UM  | UM | UM | UM | UM   | UM |
| AT5G01860 | UM  | UM   | UM  | UM | UM | UM | UM   | UM |
| AT5G01870 | UM  | UM   | UM  | UM | UM | UM | UM   | UM |
| AT5G01880 | UM  | UM   | UM  | UM | UM | UM | UM   | UM |
| AT5G01881 | UM  | UM   | UM  | UM | UM | UM | UM   | UM |
| AT5G01890 | UM  | UM   | UM  | UM | UM | UM | UM   | UM |
| AT5G01900 | UM  | UM   | UM  | UM | UM | UM | UM   | UM |
| AT5G01910 | UM  | UM   | UM  | UM | UM | UM | UM   | UM |
| AT5G01920 | UM  | UM   | UM  | UM | UM | UM | UM   | UM |



|           |      |      |      |      |      |      |      |      |
|-----------|------|------|------|------|------|------|------|------|
| AT5G02410 | UM   | UM   | UM   | UM   | UM   | UM   | mCHH | UM   |
| AT5G02420 | UM   |
| AT5G02430 | UM   |
| AT5G02440 | UM   |
| AT5G02450 | UM   |
| AT5G02460 | UM   |
| AT5G02470 | UM   |
| AT5G02480 | gbM  |
| AT5G02490 | UM   |
| AT5G02500 | UM   |
| AT5G02502 | UM   |
| AT5G02510 | UM   |
| AT5G02520 | UM   | mCHH | UM   | UM   | UM   | UM   | mCHH | UM   |
| AT5G02530 | UM   |
| AT5G02540 | UM   |
| AT5G02550 | UM   |
| AT5G02560 | UM   |
| AT5G02570 | UM   |
| AT5G02580 | UM   |
| AT5G02590 | UM   |
| AT5G02600 | UM   |
| AT5G02610 | UM   |
| AT5G02620 | UM   |
| AT5G02630 | UM   |
| AT5G02640 | UM   |
| AT5G02650 | UM   |
| AT5G02660 | UM   |
| AT5G02670 | UM   | UM   | UM   | UM   | UM   | UM   | mCHH | UM   |
| AT5G02680 | UM   |
| AT5G02690 | UM   |
| AT5G02700 | mCHH |
| AT5G02710 | UM   |
| AT5G02720 | UM   |
| AT5G02730 | UM   |
| AT5G02740 | UM   |
| AT5G02750 | UM   |
| AT5G02760 | UM   |
| AT5G02770 | UM   |
| AT5G02780 | UM   |
| AT5G02790 | UM   |
| AT5G02800 | gbM  | gbM  | gbM  | gbM  | gbM  | gbM  | mCHH | gbM  |
| AT5G02810 | gbM  | gbM  | gbM  | UM   | gbM  | UM   | mCHH | gbM  |
| AT5G02811 | UM   |
| AT5G02820 | UM   |
| AT5G02830 | UM   |
| AT5G02840 | UM   |
| AT5G02850 | UM   |
| AT5G02860 | gbM  | gbM  | gbM  | UM   | UM   | UM   | gbM  | UM   |

|           |      |      |      |      |      |      |      |      |
|-----------|------|------|------|------|------|------|------|------|
| AT5G02870 | UM   |
| AT5G02880 | gbM  | gbM  | gbM  | gbM  | gbM  | gbM  | mCHH | gbM  |
| AT5G02890 | UM   |
| AT5G02900 | UM   |
| AT5G02910 | UM   |
| AT5G02920 | UM   |
| AT5G02930 | UM   |
| AT5G02940 | UM   | UM   | UM   | UM   | UM   | UM   | mCHH | UM   |
| AT5G02950 | UM   |
| AT5G02960 | UM   |
| AT5G02970 | UM   |
| AT5G02980 | UM   |
| AT5G02990 | mCHH | mCHH | UM   | UM   | UM   | UM   | mCHH | UM   |
| AT5G03000 | UM   |
| AT5G03010 | UM   |
| AT5G03020 | UM   |
| AT5G03030 | UM   |
| AT5G03040 | UM   |
| AT5G03050 | UM   |
| AT5G03060 | UM   | UM   | UM   | UM   | UM   | UM   | mCHH | UM   |
| AT5G03070 | UM   |
| AT5G03080 | UM   |
| AT5G03090 | mCHH | mCHH | mCHH | mCHG | mCHH | mCHH | mCHH | mCHG |
| AT5G03100 | UM   |
| AT5G03110 | UM   |
| AT5G03120 | UM   |
| AT5G03130 | UM   |
| AT5G03140 | UM   |
| AT5G03150 | UM   |
| AT5G03160 | UM   | gbM  | UM   | UM   | UM   | gbM  | gbM  | UM   |
| AT5G03170 | UM   |
| AT5G03180 | UM   |
| AT5G03190 | UM   |
| AT5G03200 | UM   |
| AT5G03204 | UM   |
| AT5G03210 | UM   |
| AT5G03220 | UM   |
| AT5G03230 | UM   |
| AT5G03240 | UM   | UM   | UM   | UM   | UM   | UM   | mCHG | UM   |
| AT5G03250 | gbM  | mCHH | gbM  | gbM  | gbM  | gbM  | gbM  | gbM  |
| AT5G03260 | UM   |
| AT5G03270 | UM   |
| AT5G03280 | gbM  | gbM  | gbM  | gbM  | gbM  | gbM  | mCHH | gbM  |
| AT5G03290 | UM   |
| AT5G03300 | UM   |
| AT5G03310 | UM   |
| AT5G03320 | gbM  |
| AT5G03330 | gbM  | gbM  | gbM  | UM   | gbM  | gbM  | gbM  | UM   |





|           |      |      |      |      |         |         |      |      |
|-----------|------|------|------|------|---------|---------|------|------|
| AT5G04180 | UM   | UM   | UM   | UM   | UM      | UM      | UM   | UM   |
| AT5G04190 | UM   | UM   | UM   | UM   | UM      | UM      | UM   | UM   |
| AT5G04200 | UM   | UM   | UM   | UM   | UM      | UM      | UM   | UM   |
| AT5G04210 | UM   | UM   | UM   | UM   | UM      | UM      | UM   | UM   |
| AT5G04220 | UM   | gbM  | UM   | UM   | UM      | UM      | mCHH | UM   |
| AT5G04230 | UM   | UM   | UM   | UM   | UM      | UM      | UM   | UM   |
| AT5G04238 | UM   | UM   | UM   | UM   | UM      | UM      | UM   | UM   |
| AT5G04240 | UM   | UM   | UM   | UM   | UM      | UM      | mCHH | UM   |
| AT5G04250 | UM   | UM   | UM   | UM   | UM      | UM      | UM   | UM   |
| AT5G04260 | UM   | UM   | UM   | UM   | UM      | UM      | UM   | UM   |
| AT5G04267 | mCHH | mCHH | mCHH | mCHG | mCHG    | mCHH    | mCHH | mCHH |
| AT5G04270 | UM   | UM   | UM   | UM   | UM      | UM      | UM   | UM   |
| AT5G04280 | gbM  | gbM  | gbM  | gbM  | gbM     | gbM     | gbM  | gbM  |
| AT5G04290 | gbM  | mCHH | mCHG | gbM  | gbM     | UM      | mCHH | gbM  |
| AT5G04310 | UM   | UM   | UM   | UM   | UM      | UM      | UM   | UM   |
| AT5G04320 | gbM  | gbM  | gbM  | UM   | UM      | UM      | mCHH | gbM  |
| AT5G04330 | UM   | UM   | UM   | UM   | UM      | UM      | UM   | UM   |
| AT5G04340 | UM   | UM   | UM   | UM   | UM      | UM      | UM   | UM   |
| AT5G04347 | UM   | UM   | UM   | UM   | UM      | UM      | UM   | UM   |
| AT5G04350 | UM   | UM   | UM   | UM   | UM      | UM      | UM   | UM   |
| AT5G04360 | UM   | UM   | UM   | UM   | UM      | UM      | mCHH | UM   |
| AT5G04370 | UM   | UM   | UM   | UM   | UM      | UM      | UM   | UM   |
| AT5G04380 | UM   | UM   | UM   | UM   | UM      | UM      | UM   | UM   |
| AT5G04386 | UM   | UM   | UM   | UM   | unknown | unknown | UM   | UM   |
| AT5G04390 | UM   | UM   | UM   | UM   | UM      | UM      | UM   | UM   |
| AT5G04400 | UM   | UM   | UM   | UM   | UM      | UM      | UM   | UM   |
| AT5G04410 | gbM  | gbM  | gbM  | UM   | UM      | gbM     | gbM  | UM   |
| AT5G04420 | UM   | gbM  | gbM  | UM   | gbM     | UM      | gbM  | gbM  |
| AT5G04430 | UM   | UM   | UM   | UM   | UM      | UM      | UM   | UM   |
| AT5G04440 | UM   | UM   | UM   | UM   | UM      | UM      | UM   | UM   |
| AT5G04460 | gbM  | gbM  | gbM  | gbM  | gbM     | gbM     | gbM  | gbM  |
| AT5G04470 | UM   | UM   | UM   | UM   | UM      | UM      | UM   | UM   |
| AT5G04480 | UM   | UM   | UM   | UM   | UM      | UM      | UM   | UM   |
| AT5G04490 | UM   | UM   | UM   | UM   | UM      | UM      | UM   | UM   |
| AT5G04500 | UM   | UM   | UM   | UM   | UM      | UM      | UM   | UM   |
| AT5G04510 | gbM  | gbM  | gbM  | gbM  | gbM     | gbM     | gbM  | gbM  |
| AT5G04520 | UM   | UM   | UM   | UM   | UM      | UM      | UM   | UM   |
| AT5G04530 | UM   | UM   | UM   | UM   | UM      | UM      | UM   | UM   |
| AT5G04540 | UM   | gbM  | UM   | UM   | UM      | UM      | gbM  | gbM  |
| AT5G04550 | gbM  | gbM  | gbM  | gbM  | gbM     | gbM     | gbM  | gbM  |
| AT5G04560 | UM   | mCHH | UM   | UM   | UM      | UM      | mCHH | UM   |
| AT5G04590 | UM   | UM   | UM   | UM   | UM      | UM      | UM   | UM   |
| AT5G04600 | UM   | UM   | UM   | UM   | UM      | UM      | UM   | UM   |
| AT5G04610 | UM   | UM   | UM   | UM   | UM      | UM      | UM   | UM   |
| AT5G04620 | UM   | UM   | UM   | UM   | UM      | UM      | mCHH | UM   |
| AT5G04630 | UM   | UM   | UM   | UM   | UM      | UM      | UM   | UM   |
| AT5G04640 | UM   | UM   | UM   | UM   | UM      | UM      | UM   | UM   |
| AT5G04660 | UM   | UM   | UM   | UM   | UM      | UM      | UM   | UM   |



|           |      |      |      |      |      |      |      |      |
|-----------|------|------|------|------|------|------|------|------|
| AT5G04670 | UM   |
| AT5G04680 | UM   |
| AT5G04690 | UM   |
| AT5G04700 | UM   |
| AT5G04710 | UM   |
| AT5G04720 | UM   | UM   | UM   | UM   | UM   | UM   | mCHH | UM   |
| AT5G04730 | UM   |
| AT5G04740 | UM   |
| AT5G04750 | UM   |
| AT5G04760 | UM   |
| AT5G04770 | UM   |
| AT5G04780 | gbM  |
| AT5G04790 | UM   |
| AT5G04800 | UM   | gbM  | UM   | gbM  | gbM  | UM   | gbM  | gbM  |
| AT5G04810 | gbM  | gbM  | gbM  | UM   | UM   | UM   | gbM  | UM   |
| AT5G04820 | UM   |
| AT5G04830 | UM   |
| AT5G04840 | UM   |
| AT5G04850 | UM   |
| AT5G04853 | mCHH | mCHH | mCHH | mCHG | mCHG | mCHH | mCHH | mCHG |
| AT5G04860 | mCHH | UM   | UM   | UM   | UM   | UM   | mCHH | UM   |
| AT5G04870 | gbM  | gbM  | gbM  | gbM  | UM   | UM   | gbM  | gbM  |
| AT5G04885 | gbM  |
| AT5G04890 | mCHH | mCHH | mCHH | UM   | UM   | UM   | mCHH | UM   |
| AT5G04895 | gbM  | gbM  | gbM  | gbM  | gbM  | gbM  | mCHH | gbM  |
| AT5G04900 | UM   |
| AT5G04910 | UM   |
| AT5G04920 | UM   | UM   | UM   | UM   | UM   | UM   | mCHH | UM   |
| AT5G04930 | gbM  | gbM  | gbM  | gbM  | gbM  | gbM  | mCHH | gbM  |
| AT5G04940 | gbM  | gbM  | gbM  | UM   | UM   | UM   | gbM  | UM   |
| AT5G04950 | UM   |
| AT5G04960 | UM   |
| AT5G04970 | UM   |
| AT5G04980 | UM   |
| AT5G04990 | UM   |
| AT5G05000 | UM   |
| AT5G05010 | gbM  |
| AT5G05020 | UM   |
| AT5G05030 | UM   |
| AT5G05040 | UM   |
| AT5G05050 | UM   |
| AT5G05060 | UM   |
| AT5G05070 | UM   |
| AT5G05080 | UM   | UM   | UM   | gbM  | UM   | UM   | UM   | UM   |
| AT5G05090 | UM   |
| AT5G05100 | UM   |
| AT5G05110 | UM   |
| AT5G05113 | UM   |

|           |      |      |      |      |      |      |      |      |
|-----------|------|------|------|------|------|------|------|------|
| AT5G05120 | mCHH | mCHH | mCHH | mCHG | gbM  | mCHH | mCHH | mCHG |
| AT5G05130 | UM   |
| AT5G05140 | UM   |
| AT5G05150 | UM   |
| AT5G05160 | UM   |
| AT5G05170 | UM   | UM   | UM   | UM   | UM   | UM   | mCHH | UM   |
| AT5G05180 | UM   |
| AT5G05190 | UM   |
| AT5G05200 | UM   |
| AT5G05210 | mCHH | mCHH | mCHH | UM   | gbM  | UM   | mCHH | gbM  |
| AT5G05220 | UM   |
| AT5G05230 | UM   |
| AT5G05240 | UM   | gbM  | UM   | UM   | UM   | gbM  | UM   | UM   |
| AT5G05250 | UM   |
| AT5G05260 | mCHH | mCHH | mCHH | mCHG | mCHH | mCHG | mCHH | mCHH |
| AT5G05270 | UM   |
| AT5G05280 | UM   |
| AT5G05282 | UM   |
| AT5G05290 | UM   |
| AT5G05300 | UM   |
| AT5G05310 | UM   |
| AT5G05320 | UM   |
| AT5G05330 | UM   |
| AT5G05340 | UM   |
| AT5G05350 | UM   |
| AT5G05360 | UM   |
| AT5G05365 | UM   |
| AT5G05370 | UM   |
| AT5G05380 | UM   |
| AT5G05390 | UM   |
| AT5G05400 | gbM  | mCHH | UM   | UM   | UM   | UM   | mCHH | UM   |
| AT5G05410 | UM   |
| AT5G05420 | UM   |
| AT5G05430 | UM   |
| AT5G05440 | UM   |
| AT5G05450 | UM   |
| AT5G05460 | UM   | UM   | UM   | UM   | UM   | UM   | mCHH | UM   |
| AT5G05470 | UM   |
| AT5G05480 | UM   |
| AT5G05490 | UM   |
| AT5G05500 | UM   |
| AT5G05510 | UM   | mCHH | UM   | UM   | UM   | UM   | UM   | UM   |
| AT5G05520 | UM   |
| AT5G05530 | UM   |
| AT5G05540 | UM   | gbM  | gbM  | UM   | UM   | UM   | mCHH | UM   |
| AT5G05550 | UM   |
| AT5G05560 | gbM  | gbM  | gbM  | gbM  | gbM  | gbM  | mCHH | gbM  |
| AT5G05570 | gbM  | gbM  | gbM  | UM   | gbM  | gbM  | mCHH | gbM  |

|           |      |      |      |      |      |      |      |      |
|-----------|------|------|------|------|------|------|------|------|
| AT5G05580 | UM   |
| AT5G05590 | UM   | gbM  | UM   | gbM  | gbM  | gbM  | gbM  | gbM  |
| AT5G05598 | UM   |
| AT5G05600 | UM   |
| AT5G05610 | UM   |
| AT5G05620 | UM   |
| AT5G05630 | UM   |
| AT5G05640 | UM   |
| AT5G05650 | mCHH | mCHH | mCHH | mCHG | mCHG | mCHG | mCHH | mCHG |
| AT5G05657 | UM   |
| AT5G05660 | UM   |
| AT5G05670 | UM   | gbM  | UM   | UM   | UM   | UM   | UM   | UM   |
| AT5G05680 | UM   | UM   | UM   | UM   | UM   | UM   | mCHH | UM   |
| AT5G05690 | UM   |
| AT5G05700 | UM   |
| AT5G05710 | UM   |
| AT5G05720 | UM   |
| AT5G05730 | gbM  | gbM  | gbM  | UM   | gbM  | UM   | gbM  | gbM  |
| AT5G05740 | UM   | gbM  | UM   | UM   | UM   | UM   | gbM  | UM   |
| AT5G05750 | UM   |
| AT5G05760 | UM   |
| AT5G05770 | UM   |
| AT5G05780 | UM   |
| AT5G05790 | UM   |
| AT5G05800 | gbM  | gbM  | UM   | UM   | UM   | UM   | gbM  | gbM  |
| AT5G05810 | UM   |
| AT5G05820 | UM   |
| AT5G05830 | UM   |
| AT5G05840 | UM   |
| AT5G05850 | UM   |
| AT5G05860 | UM   |
| AT5G05870 | UM   |
| AT5G05880 | UM   |
| AT5G05890 | UM   |
| AT5G05900 | UM   |
| AT5G05910 | UM   |
| AT5G05920 | UM   |
| AT5G05930 | gbM  | gbM  | gbM  | gbM  | gbM  | UM   | gbM  | gbM  |
| AT5G05940 | UM   |
| AT5G05950 | UM   |
| AT5G05960 | UM   | gbM  | UM   | UM   | UM   | UM   | gbM  | UM   |
| AT5G05965 | UM   |
| AT5G05970 | gbM  |
| AT5G05980 | gbM  | gbM  | gbM  | gbM  | gbM  | gbM  | mCHH | gbM  |
| AT5G05987 | UM   |
| AT5G05990 | UM   |
| AT5G06000 | UM   |
| AT5G06010 | UM   |

|           |      |      |      |      |      |      |      |      |
|-----------|------|------|------|------|------|------|------|------|
| AT5G06020 | mCHH | mCHH | mCHH | mCHH | UM   | gbM  | mCHH | mCHH |
| AT5G06030 | mCHH | mCHH | mCHH | UM   | mCHH | mCHH | mCHH | mCHH |
| AT5G06040 | mCHH | mCHH | UM   | UM   | UM   | UM   | mCHH | mCHH |
| AT5G06043 | mCHH | mCHH | mCHH | mCHG | mCHH | mCHH | mCHH | mCHH |
| AT5G06050 | UM   |
| AT5G06060 | gbM  | gbM  | UM   | UM   | UM   | UM   | gbM  | UM   |
| AT5G06070 | UM   |
| AT5G06080 | UM   |
| AT5G06090 | UM   |
| AT5G06100 | gbM  | UM   |
| AT5G06110 | UM   | mCHH | UM   | UM   | UM   | UM   | mCHH | UM   |
| AT5G06120 | gbM  | mCHH | gbM  | gbM  | gbM  | gbM  | mCHH | gbM  |
| AT5G06130 | UM   |
| AT5G06140 | UM   |
| AT5G06150 | UM   |
| AT5G06160 | gbM  | gbM  | gbM  | UM   | UM   | UM   | gbM  | gbM  |
| AT5G06170 | mCHH | mCHH | mCHH | UM   | UM   | UM   | mCHH | UM   |
| AT5G06180 | UM   |
| AT5G06190 | UM   |
| AT5G06200 | UM   |
| AT5G06210 | UM   |
| AT5G06220 | gbM  | gbM  | gbM  | gbM  | gbM  | gbM  | mCHH | gbM  |
| AT5G06230 | UM   |
| AT5G06240 | UM   |
| AT5G06250 | UM   |
| AT5G06260 | UM   |
| AT5G06265 | UM   |
| AT5G06270 | UM   |
| AT5G06280 | UM   |
| AT5G06290 | UM   |
| AT5G06300 | UM   |
| AT5G06310 | UM   |
| AT5G06320 | UM   |
| AT5G06330 | UM   |
| AT5G06340 | UM   |
| AT5G06350 | gbM  | gbM  | gbM  | UM   | gbM  | gbM  | mCHH | gbM  |
| AT5G06360 | UM   |
| AT5G06370 | UM   |
| AT5G06380 | UM   |
| AT5G06390 | UM   |
| AT5G06400 | UM   |
| AT5G06410 | UM   |
| AT5G06420 | UM   |
| AT5G06430 | UM   |
| AT5G06440 | UM   | UM   | UM   | UM   | UM   | UM   | mCHH | UM   |
| AT5G06450 | UM   |
| AT5G06460 | gbM  |
| AT5G06470 | UM   |

|           |      |      |      |      |      |      |      |      |
|-----------|------|------|------|------|------|------|------|------|
| AT5G06480 | UM   |
| AT5G06490 | UM   |
| AT5G06500 | UM   |
| AT5G06510 | UM   |
| AT5G06520 | UM   |
| AT5G06530 | UM   |
| AT5G06540 | UM   |
| AT5G06550 | UM   |
| AT5G06560 | gbM  | gbM  | gbM  | gbM  | UM   | gbM  | gbM  | gbM  |
| AT5G06570 | UM   |
| AT5G06580 | UM   |
| AT5G06590 | UM   |
| AT5G06600 | gbM  | gbM  | gbM  | gbM  | gbM  | gbM  | mCHH | gbM  |
| AT5G06610 | UM   | UM   | UM   | UM   | UM   | UM   | mCHH | UM   |
| AT5G06620 | UM   |
| AT5G06630 | mCHH | mCHH | mCHH | mCHH | mCHG | mCHH | mCHH | mCHH |
| AT5G06640 | mCHH |
| AT5G06650 | UM   |
| AT5G06660 | UM   |
| AT5G06670 | gbM  | mCHH | UM   | UM   | UM   | UM   | mCHH | UM   |
| AT5G06680 | gbM  |
| AT5G06690 | UM   |
| AT5G06700 | UM   |
| AT5G06710 | UM   |
| AT5G06720 | UM   |
| AT5G06730 | UM   |
| AT5G06740 | UM   |
| AT5G06750 | UM   |
| AT5G06755 | UM   |
| AT5G06760 | UM   |
| AT5G06770 | UM   |
| AT5G06780 | UM   | gbM  | UM   | UM   | UM   | gbM  | gbM  | UM   |
| AT5G06790 | UM   |
| AT5G06800 | UM   |
| AT5G06810 | UM   |
| AT5G06820 | UM   |
| AT5G06830 | UM   |
| AT5G06839 | UM   |
| AT5G06850 | UM   |
| AT5G06860 | UM   |
| AT5G06870 | UM   |
| AT5G06890 | UM   |
| AT5G06900 | UM   |
| AT5G06905 | UM   |
| AT5G06910 | UM   |
| AT5G06920 | UM   |
| AT5G06930 | UM   |
| AT5G06940 | UM   |





|           |      |      |      |      |      |      |      |      |
|-----------|------|------|------|------|------|------|------|------|
| AT5G07870 | UM   |
| AT5G07880 | UM   |
| AT5G07890 | gbM  |
| AT5G07900 | UM   |
| AT5G07910 | UM   |
| AT5G07920 | gbM  |
| AT5G07930 | UM   |
| AT5G07940 | gbM  | mCHH | gbM  | gbM  | gbM  | gbM  | gbM  | gbM  |
| AT5G07950 | UM   |
| AT5G07960 | UM   |
| AT5G07970 | gbM  | gbM  | gbM  | UM   | UM   | gbM  | gbM  | UM   |
| AT5G07980 | gbM  | mCHH | gbM  | gbM  | gbM  | gbM  | mCHH | gbM  |
| AT5G07990 | UM   |
| AT5G08000 | UM   |
| AT5G08010 | UM   | UM   | UM   | UM   | UM   | UM   | mCHH | UM   |
| AT5G08020 | UM   |
| AT5G08030 | UM   |
| AT5G08040 | UM   |
| AT5G08050 | UM   |
| AT5G08055 | mCHH | mCHH | mCHH | mCHG | mCHG | mCHG | mCHH | mCHH |
| AT5G08060 | UM   |
| AT5G08070 | UM   |
| AT5G08080 | UM   |
| AT5G08090 | UM   |
| AT5G08100 | UM   |
| AT5G08110 | gbM  | gbM  | gbM  | gbM  | gbM  | gbM  | mCHH | gbM  |
| AT5G08120 | UM   |
| AT5G08130 | UM   |
| AT5G08139 | UM   |
| AT5G08141 | UM   |
| AT5G08150 | UM   |
| AT5G08160 | UM   |
| AT5G08170 | UM   | mCHH | UM   | UM   | UM   | UM   | UM   | UM   |
| AT5G08180 | UM   |
| AT5G08185 | UM   |
| AT5G08190 | UM   |
| AT5G08200 | UM   |
| AT5G08220 | UM   |
| AT5G08230 | gbM  | gbM  | gbM  | gbM  | gbM  | gbM  | mCHH | gbM  |
| AT5G08240 | UM   |
| AT5G08250 | UM   |
| AT5G08260 | UM   |
| AT5G08270 | UM   | UM   | UM   | UM   | UM   | UM   | mCHH | UM   |
| AT5G08280 | gbM  | gbM  | UM   | UM   | gbM  | UM   | gbM  | UM   |
| AT5G08290 | UM   |
| AT5G08300 | UM   | mCHH | UM   | UM   | UM   | UM   | UM   | UM   |
| AT5G08305 | UM   | gbM  | UM   | UM   | UM   | UM   | UM   | UM   |
| AT5G08310 | UM   | UM   | UM   | UM   | UM   | UM   | mCHH | UM   |



|           |      |      |      |      |      |      |      |      |
|-----------|------|------|------|------|------|------|------|------|
| AT5G08315 | mCHH | mCHH | mCHH | mCHG | mCHH | mCHH | mCHH | mCHH |
| AT5G08320 | UM   |
| AT5G08330 | UM   |
| AT5G08335 | gbM  | gbM  | gbM  | gbM  | UM   | gbM  | gbM  | gbM  |
| AT5G08340 | UM   | gbM  | UM   | gbM  | UM   | UM   | UM   | UM   |
| AT5G08350 | UM   |
| AT5G08360 | UM   |
| AT5G08370 | UM   |
| AT5G08380 | UM   |
| AT5G08390 | gbM  | gbM  | gbM  | UM   | gbM  | gbM  | gbM  | gbM  |
| AT5G08391 | UM   |
| AT5G08400 | UM   |
| AT5G08410 | UM   |
| AT5G08415 | UM   |
| AT5G08420 | UM   |
| AT5G08430 | UM   | UM   | UM   | UM   | UM   | UM   | gbM  | UM   |
| AT5G08440 | gbM  |
| AT5G08450 | mCHH | mCHH | gbM  | gbM  | gbM  | gbM  | mCHH | gbM  |
| AT5G08460 | UM   |
| AT5G08470 | gbM  | gbM  | gbM  | gbM  | UM   | UM   | gbM  | gbM  |
| AT5G08480 | UM   |
| AT5G08490 | UM   |
| AT5G08500 | UM   |
| AT5G08505 | UM   |
| AT5G08510 | UM   |
| AT5G08520 | gbM  |
| AT5G08530 | gbM  | gbM  | gbM  | UM   | gbM  | gbM  | gbM  | UM   |
| AT5G08535 | UM   |
| AT5G08540 | UM   |
| AT5G08550 | UM   |
| AT5G08560 | gbM  |
| AT5G08565 | UM   |
| AT5G08570 | gbM  |
| AT5G08580 | UM   |
| AT5G08590 | UM   | UM   | UM   | UM   | UM   | UM   | mCHH | UM   |
| AT5G08600 | UM   | UM   | UM   | UM   | UM   | UM   | mCHG | UM   |
| AT5G08610 | UM   |
| AT5G08620 | UM   |
| AT5G08630 | gbM  | gbM  | gbM  | gbM  | gbM  | gbM  | mCHH | gbM  |
| AT5G08640 | UM   |
| AT5G08650 | gbM  | gbM  | UM   | UM   | gbM  | UM   | mCHH | gbM  |
| AT5G08660 | gbM  | mCHH | gbM  | gbM  | gbM  | gbM  | mCHH | gbM  |
| AT5G08670 | UM   |
| AT5G08680 | UM   |
| AT5G08690 | UM   | gbM  | UM   | UM   | UM   | UM   | UM   | UM   |
| AT5G08695 | UM   |
| AT5G08710 | UM   |
| AT5G08720 | UM   | mCHH | UM   | UM   | UM   | UM   | UM   | UM   |



|           |      |      |      |     |     |     |      |     |
|-----------|------|------|------|-----|-----|-----|------|-----|
| AT5G09570 | UM   | UM   | UM   | UM  | UM  | UM  | UM   | UM  |
| AT5G09580 | UM   | UM   | UM   | UM  | UM  | UM  | UM   | UM  |
| AT5G09590 | UM   | UM   | UM   | UM  | UM  | UM  | UM   | UM  |
| AT5G09600 | UM   | UM   | UM   | UM  | UM  | UM  | UM   | UM  |
| AT5G09610 | UM   | UM   | UM   | UM  | UM  | UM  | UM   | UM  |
| AT5G09620 | UM   | UM   | UM   | UM  | UM  | UM  | UM   | UM  |
| AT5G09630 | UM   | gbM  | gbM  | gbM | gbM | gbM | gbM  | gbM |
| AT5G09640 | UM   | UM   | UM   | UM  | UM  | UM  | UM   | UM  |
| AT5G09650 | UM   | UM   | UM   | UM  | UM  | UM  | UM   | UM  |
| AT5G09660 | UM   | UM   | UM   | UM  | UM  | UM  | UM   | UM  |
| AT5G09670 | UM   | UM   | UM   | UM  | UM  | UM  | UM   | UM  |
| AT5G09672 | UM   | UM   | UM   | UM  | UM  | UM  | UM   | UM  |
| AT5G09680 | UM   | UM   | UM   | UM  | UM  | UM  | UM   | UM  |
| AT5G09690 | UM   | UM   | UM   | UM  | UM  | UM  | UM   | UM  |
| AT5G09700 | UM   | UM   | UM   | UM  | UM  | UM  | UM   | UM  |
| AT5G09710 | UM   | UM   | UM   | UM  | UM  | UM  | UM   | UM  |
| AT5G09711 | UM   | UM   | UM   | UM  | UM  | UM  | UM   | UM  |
| AT5G09720 | UM   | UM   | UM   | UM  | UM  | UM  | UM   | UM  |
| AT5G09730 | UM   | UM   | UM   | UM  | UM  | UM  | UM   | UM  |
| AT5G09740 | UM   | UM   | UM   | UM  | UM  | UM  | UM   | UM  |
| AT5G09750 | UM   | UM   | UM   | UM  | UM  | UM  | UM   | UM  |
| AT5G09760 | UM   | UM   | UM   | UM  | UM  | UM  | UM   | UM  |
| AT5G09770 | UM   | UM   | UM   | UM  | UM  | UM  | UM   | UM  |
| AT5G09780 | UM   | UM   | UM   | UM  | UM  | UM  | UM   | UM  |
| AT5G09790 | UM   | UM   | UM   | UM  | UM  | UM  | mCHH | UM  |
| AT5G09800 | UM   | UM   | UM   | UM  | UM  | UM  | UM   | UM  |
| AT5G09805 | UM   | UM   | UM   | UM  | UM  | UM  | UM   | UM  |
| AT5G09810 | gbM  | gbM  | UM   | gbM | gbM | gbM | UM   | gbM |
| AT5G09820 | UM   | UM   | UM   | UM  | UM  | UM  | UM   | UM  |
| AT5G09830 | UM   | UM   | UM   | UM  | UM  | UM  | UM   | UM  |
| AT5G09840 | UM   | gbM  | gbM  | UM  | UM  | UM  | gbM  | UM  |
| AT5G09850 | UM   | UM   | UM   | UM  | UM  | UM  | UM   | UM  |
| AT5G09860 | gbM  | gbM  | gbM  | gbM | gbM | gbM | mCHH | gbM |
| AT5G09870 | gbM  | gbM  | gbM  | gbM | gbM | gbM | gbM  | gbM |
| AT5G09876 | UM   | UM   | mCHH | UM  | UM  | UM  | UM   | UM  |
| AT5G09880 | mCHH | mCHH | UM   | UM  | UM  | UM  | mCHH | UM  |
| AT5G09890 | UM   | UM   | UM   | UM  | UM  | UM  | mCHH | UM  |
| AT5G09900 | UM   | UM   | UM   | UM  | UM  | UM  | UM   | UM  |
| AT5G09910 | UM   | UM   | UM   | UM  | UM  | UM  | UM   | UM  |
| AT5G09920 | UM   | UM   | UM   | UM  | UM  | UM  | UM   | UM  |
| AT5G09930 | UM   | UM   | UM   | UM  | UM  | UM  | UM   | UM  |
| AT5G09940 | UM   | UM   | UM   | UM  | UM  | UM  | UM   | UM  |
| AT5G09950 | gbM  | gbM  | gbM  | gbM | gbM | gbM | mCHH | gbM |
| AT5G09960 | UM   | UM   | UM   | UM  | UM  | UM  | UM   | UM  |
| AT5G09970 | UM   | UM   | UM   | UM  | UM  | UM  | UM   | UM  |
| AT5G09976 | UM   | UM   | UM   | UM  | UM  | UM  | UM   | UM  |
| AT5G09978 | UM   | UM   | UM   | UM  | UM  | UM  | UM   | UM  |
| AT5G09980 | UM   | UM   | UM   | UM  | UM  | UM  | UM   | UM  |

|           |      |      |      |     |     |     |      |     |
|-----------|------|------|------|-----|-----|-----|------|-----|
| AT5G09990 | UM   | UM   | UM   | UM  | UM  | UM  | UM   | UM  |
| AT5G09995 | UM   | UM   | UM   | UM  | UM  | UM  | UM   | UM  |
| AT5G10000 | UM   | UM   | UM   | UM  | UM  | UM  | UM   | UM  |
| AT5G10010 | mCHH | mCHH | UM   | UM  | UM  | UM  | mCHH | UM  |
| AT5G10020 | gbM  | gbM  | gbM  | gbM | gbM | gbM | gbM  | gbM |
| AT5G10030 | UM   | UM   | UM   | UM  | UM  | UM  | UM   | UM  |
| AT5G10040 | UM   | UM   | UM   | UM  | UM  | UM  | UM   | UM  |
| AT5G10050 | UM   | UM   | UM   | UM  | UM  | UM  | UM   | UM  |
| AT5G10060 | UM   | UM   | UM   | UM  | UM  | UM  | UM   | UM  |
| AT5G10070 | UM   | UM   | UM   | UM  | UM  | UM  | UM   | UM  |
| AT5G10080 | UM   | UM   | UM   | UM  | UM  | UM  | UM   | UM  |
| AT5G10090 | UM   | UM   | UM   | UM  | UM  | UM  | UM   | UM  |
| AT5G10100 | UM   | UM   | UM   | UM  | UM  | UM  | UM   | UM  |
| AT5G10110 | UM   | UM   | UM   | UM  | UM  | UM  | UM   | UM  |
| AT5G10120 | UM   | UM   | UM   | UM  | UM  | UM  | UM   | UM  |
| AT5G10130 | UM   | UM   | UM   | UM  | UM  | UM  | UM   | UM  |
| AT5G10140 | UM   | mCHH | UM   | UM  | UM  | UM  | UM   | UM  |
| AT5G10150 | UM   | UM   | UM   | UM  | UM  | UM  | UM   | UM  |
| AT5G10160 | UM   | UM   | UM   | UM  | UM  | UM  | UM   | UM  |
| AT5G10170 | UM   | UM   | UM   | UM  | UM  | UM  | UM   | UM  |
| AT5G10180 | UM   | UM   | UM   | UM  | UM  | UM  | UM   | UM  |
| AT5G10190 | UM   | UM   | UM   | UM  | UM  | UM  | UM   | UM  |
| AT5G10200 | gbM  | gbM  | gbM  | gbM | gbM | gbM | mCHH | gbM |
| AT5G10210 | UM   | UM   | UM   | UM  | UM  | UM  | UM   | UM  |
| AT5G10220 | UM   | UM   | UM   | UM  | UM  | UM  | mCHH | UM  |
| AT5G10230 | UM   | UM   | UM   | UM  | UM  | UM  | UM   | UM  |
| AT5G10240 | gbM  | gbM  | gbM  | gbM | gbM | gbM | mCHH | gbM |
| AT5G10250 | UM   | UM   | UM   | UM  | UM  | UM  | UM   | UM  |
| AT5G10260 | UM   | UM   | UM   | UM  | UM  | UM  | UM   | UM  |
| AT5G10270 | gbM  | gbM  | gbM  | gbM | UM  | gbM | gbM  | UM  |
| AT5G10280 | UM   | UM   | UM   | UM  | UM  | UM  | UM   | UM  |
| AT5G10290 | UM   | gbM  | gbM  | gbM | gbM | gbM | gbM  | gbM |
| AT5G10300 | UM   | UM   | UM   | UM  | UM  | UM  | UM   | UM  |
| AT5G10310 | UM   | UM   | UM   | UM  | UM  | UM  | mCHH | UM  |
| AT5G10320 | UM   | UM   | UM   | UM  | UM  | UM  | UM   | UM  |
| AT5G10330 | UM   | UM   | UM   | UM  | UM  | UM  | UM   | UM  |
| AT5G10336 | UM   | UM   | UM   | UM  | UM  | UM  | UM   | UM  |
| AT5G10340 | mCHH | mCHH | mCHH | UM  | UM  | UM  | mCHH | UM  |
| AT5G10350 | UM   | UM   | UM   | UM  | UM  | UM  | UM   | UM  |
| AT5G10360 | UM   | UM   | UM   | UM  | UM  | UM  | UM   | UM  |
| AT5G10370 | gbM  | gbM  | gbM  | gbM | gbM | gbM | gbM  | gbM |
| AT5G10380 | UM   | UM   | UM   | UM  | UM  | UM  | UM   | UM  |
| AT5G10390 | UM   | UM   | UM   | UM  | UM  | UM  | UM   | UM  |
| AT5G10400 | UM   | UM   | UM   | UM  | UM  | UM  | UM   | UM  |
| AT5G10410 | UM   | UM   | UM   | UM  | UM  | UM  | UM   | UM  |
| AT5G10420 | UM   | UM   | UM   | UM  | UM  | UM  | UM   | UM  |
| AT5G10430 | UM   | UM   | UM   | UM  | UM  | UM  | UM   | UM  |
| AT5G10440 | UM   | UM   | UM   | UM  | UM  | UM  | mCHH | UM  |

|           |      |      |      |     |     |     |      |     |
|-----------|------|------|------|-----|-----|-----|------|-----|
| AT5G10450 | UM   | UM   | UM   | UM  | UM  | UM  | UM   | UM  |
| AT5G10460 | UM   | UM   | UM   | UM  | UM  | UM  | UM   | UM  |
| AT5G10470 | gbM  | mCHH | gbM  | gbM | gbM | gbM | gbM  | gbM |
| AT5G10480 | UM   | UM   | UM   | UM  | UM  | UM  | UM   | UM  |
| AT5G10490 | gbM  | mCHH | gbM  | gbM | gbM | gbM | mCHH | gbM |
| AT5G10500 | UM   | mCHH | mCHH | UM  | UM  | UM  | mCHH | UM  |
| AT5G10504 | UM   | UM   | UM   | UM  | UM  | UM  | UM   | UM  |
| AT5G10510 | UM   | UM   | UM   | UM  | UM  | UM  | UM   | UM  |
| AT5G10520 | UM   | UM   | UM   | UM  | UM  | UM  | UM   | UM  |
| AT5G10530 | UM   | UM   | UM   | UM  | UM  | UM  | UM   | UM  |
| AT5G10540 | gbM  | gbM  | gbM  | gbM | gbM | gbM | mCHH | gbM |
| AT5G10550 | UM   | UM   | UM   | UM  | UM  | UM  | UM   | UM  |
| AT5G10560 | UM   | UM   | UM   | UM  | UM  | UM  | UM   | UM  |
| AT5G10570 | UM   | UM   | UM   | UM  | UM  | UM  | UM   | UM  |
| AT5G10580 | UM   | UM   | UM   | UM  | UM  | UM  | UM   | UM  |
| AT5G10590 | UM   | UM   | UM   | UM  | UM  | UM  | UM   | UM  |
| AT5G10600 | UM   | UM   | UM   | UM  | UM  | UM  | UM   | UM  |
| AT5G10605 | UM   | UM   | UM   | UM  | UM  | UM  | UM   | UM  |
| AT5G10610 | UM   | UM   | UM   | UM  | UM  | UM  | UM   | UM  |
| AT5G10620 | UM   | UM   | UM   | UM  | UM  | UM  | UM   | UM  |
| AT5G10625 | UM   | UM   | UM   | UM  | UM  | UM  | UM   | UM  |
| AT5G10630 | gbM  | gbM  | gbM  | UM  | gbM | gbM | mCHH | gbM |
| AT5G10650 | UM   | UM   | UM   | UM  | UM  | UM  | UM   | UM  |
| AT5G10660 | mCHH | mCHH | mCHH | UM  | UM  | UM  | mCHH | UM  |
| AT5G10680 | gbM  | UM   | mCHH | UM  | UM  | UM  | UM   | gbM |
| AT5G10690 | UM   | UM   | UM   | UM  | UM  | UM  | UM   | UM  |
| AT5G10695 | UM   | UM   | UM   | UM  | UM  | UM  | UM   | UM  |
| AT5G10700 | UM   | UM   | UM   | UM  | UM  | UM  | UM   | UM  |
| AT5G10710 | UM   | gbM  | UM   | UM  | UM  | UM  | UM   | UM  |
| AT5G10720 | UM   | gbM  | UM   | UM  | UM  | UM  | UM   | UM  |
| AT5G10730 | UM   | UM   | UM   | UM  | UM  | UM  | UM   | UM  |
| AT5G10740 | UM   | UM   | UM   | UM  | UM  | UM  | UM   | UM  |
| AT5G10745 | UM   | UM   | UM   | UM  | UM  | UM  | UM   | UM  |
| AT5G10750 | UM   | UM   | UM   | UM  | UM  | UM  | UM   | UM  |
| AT5G10760 | UM   | UM   | UM   | UM  | UM  | UM  | UM   | UM  |
| AT5G10770 | UM   | UM   | UM   | UM  | UM  | UM  | UM   | UM  |
| AT5G10780 | UM   | UM   | UM   | UM  | UM  | UM  | UM   | UM  |
| AT5G10790 | UM   | UM   | UM   | UM  | UM  | UM  | UM   | UM  |
| AT5G10800 | UM   | UM   | UM   | UM  | UM  | UM  | mCHH | UM  |
| AT5G10810 | UM   | UM   | UM   | UM  | UM  | UM  | UM   | UM  |
| AT5G10820 | UM   | UM   | UM   | UM  | UM  | UM  | UM   | UM  |
| AT5G10830 | UM   | UM   | UM   | UM  | UM  | UM  | UM   | UM  |
| AT5G10840 | gbM  | gbM  | gbM  | gbM | gbM | gbM | mCHH | gbM |
| AT5G10860 | UM   | UM   | UM   | UM  | UM  | UM  | UM   | UM  |
| AT5G10870 | UM   | UM   | UM   | UM  | UM  | UM  | UM   | UM  |
| AT5G10880 | UM   | UM   | UM   | UM  | UM  | UM  | UM   | UM  |
| AT5G10890 | UM   | UM   | UM   | UM  | UM  | UM  | UM   | UM  |
| AT5G10900 | UM   | UM   | UM   | UM  | UM  | UM  | UM   | UM  |

|           |      |      |      |     |     |     |      |     |
|-----------|------|------|------|-----|-----|-----|------|-----|
| AT5G10910 | UM   | UM   | UM   | UM  | UM  | UM  | UM   | UM  |
| AT5G10920 | UM   | UM   | UM   | UM  | UM  | UM  | UM   | UM  |
| AT5G10930 | UM   | UM   | UM   | UM  | UM  | UM  | UM   | UM  |
| AT5G10940 | gbM  | mCHH | gbM  | gbM | gbM | gbM | gbM  | gbM |
| AT5G10946 | UM   | UM   | UM   | UM  | UM  | UM  | UM   | UM  |
| AT5G10950 | mCHH | UM   | mCHH | UM  | UM  | UM  | mCHH | UM  |
| AT5G10960 | UM   | UM   | UM   | UM  | UM  | UM  | UM   | UM  |
| AT5G10970 | gbM  | gbM  | UM   | gbM | UM  | UM  | gbM  | UM  |
| AT5G10980 | UM   | UM   | UM   | UM  | UM  | UM  | UM   | UM  |
| AT5G10990 | UM   | UM   | UM   | UM  | UM  | UM  | UM   | UM  |
| AT5G11000 | UM   | UM   | UM   | UM  | UM  | UM  | UM   | UM  |
| AT5G11010 | UM   | UM   | UM   | UM  | UM  | UM  | UM   | UM  |
| AT5G11020 | UM   | UM   | UM   | UM  | UM  | UM  | UM   | UM  |
| AT5G11027 | UM   | UM   | UM   | UM  | UM  | UM  | UM   | UM  |
| AT5G11030 | UM   | UM   | UM   | UM  | UM  | UM  | UM   | UM  |
| AT5G11040 | gbM  | gbM  | gbM  | gbM | gbM | gbM | gbM  | gbM |
| AT5G11050 | UM   | UM   | UM   | UM  | UM  | UM  | UM   | UM  |
| AT5G11060 | UM   | UM   | UM   | UM  | UM  | UM  | UM   | UM  |
| AT5G11070 | UM   | UM   | UM   | UM  | UM  | UM  | UM   | UM  |
| AT5G11080 | UM   | UM   | UM   | UM  | UM  | UM  | UM   | UM  |
| AT5G11090 | UM   | UM   | UM   | UM  | UM  | UM  | UM   | UM  |
| AT5G11100 | UM   | UM   | UM   | UM  | UM  | UM  | mCHH | UM  |
| AT5G11110 | UM   | UM   | UM   | UM  | UM  | UM  | UM   | UM  |
| AT5G11130 | UM   | UM   | UM   | UM  | UM  | UM  | UM   | UM  |
| AT5G11140 | UM   | UM   | UM   | UM  | UM  | UM  | UM   | UM  |
| AT5G11150 | UM   | UM   | UM   | UM  | UM  | UM  | UM   | UM  |
| AT5G11160 | UM   | UM   | UM   | UM  | UM  | UM  | UM   | UM  |
| AT5G11170 | UM   | UM   | UM   | UM  | UM  | UM  | UM   | UM  |
| AT5G11180 | UM   | mCHH | UM   | UM  | UM  | UM  | mCHH | UM  |
| AT5G11190 | UM   | UM   | UM   | UM  | UM  | UM  | UM   | UM  |
| AT5G11200 | UM   | UM   | UM   | UM  | UM  | UM  | UM   | UM  |
| AT5G11210 | UM   | UM   | UM   | UM  | UM  | UM  | UM   | UM  |
| AT5G11220 | UM   | UM   | UM   | UM  | UM  | UM  | UM   | UM  |
| AT5G11230 | UM   | UM   | UM   | UM  | UM  | UM  | UM   | UM  |
| AT5G11240 | UM   | UM   | UM   | UM  | UM  | UM  | UM   | UM  |
| AT5G11250 | UM   | UM   | UM   | UM  | UM  | UM  | UM   | UM  |
| AT5G11260 | UM   | UM   | UM   | UM  | UM  | UM  | UM   | UM  |
| AT5G11270 | UM   | UM   | UM   | UM  | UM  | UM  | UM   | UM  |
| AT5G11280 | UM   | UM   | UM   | UM  | UM  | UM  | UM   | UM  |
| AT5G11290 | UM   | UM   | UM   | UM  | UM  | UM  | UM   | UM  |
| AT5G11300 | UM   | UM   | UM   | UM  | UM  | UM  | UM   | UM  |
| AT5G11310 | UM   | UM   | UM   | UM  | UM  | UM  | UM   | UM  |
| AT5G11320 | UM   | UM   | UM   | UM  | UM  | UM  | UM   | UM  |
| AT5G11330 | UM   | UM   | UM   | UM  | UM  | UM  | UM   | UM  |
| AT5G11340 | UM   | UM   | UM   | UM  | UM  | UM  | UM   | UM  |
| AT5G11350 | UM   | UM   | UM   | UM  | UM  | UM  | UM   | UM  |
| AT5G11360 | UM   | UM   | UM   | UM  | UM  | UM  | UM   | UM  |
| AT5G11370 | UM   | mCHH | mCHG | UM  | UM  | UM  | mCHH | UM  |

|           |      |      |      |     |     |     |      |     |
|-----------|------|------|------|-----|-----|-----|------|-----|
| AT5G11380 | gbM  | gbM  | gbM  | gbM | gbM | gbM | gbM  | gbM |
| AT5G11390 | UM   | mCHH | UM   | UM  | UM  | UM  | UM   | UM  |
| AT5G11400 | UM   | UM   | UM   | UM  | UM  | UM  | UM   | UM  |
| AT5G11410 | UM   | UM   | UM   | UM  | UM  | UM  | UM   | UM  |
| AT5G11412 | UM   | UM   | UM   | UM  | UM  | UM  | UM   | UM  |
| AT5G11416 | UM   | UM   | UM   | UM  | UM  | UM  | UM   | UM  |
| AT5G11420 | UM   | UM   | UM   | UM  | UM  | UM  | UM   | UM  |
| AT5G11425 | UM   | UM   | UM   | UM  | UM  | UM  | UM   | UM  |
| AT5G11430 | mCHG | mCHG | mCHG | UM  | UM  | UM  | mCHH | UM  |
| AT5G11440 | UM   | UM   | UM   | UM  | UM  | UM  | UM   | UM  |
| AT5G11450 | UM   | UM   | UM   | UM  | UM  | UM  | UM   | UM  |
| AT5G11460 | UM   | UM   | UM   | UM  | UM  | UM  | UM   | UM  |
| AT5G11470 | gbM  | gbM  | gbM  | gbM | gbM | gbM | mCHH | gbM |
| AT5G11480 | UM   | UM   | UM   | UM  | UM  | UM  | UM   | UM  |
| AT5G11490 | gbM  | gbM  | gbM  | gbM | gbM | gbM | gbM  | gbM |
| AT5G11500 | UM   | UM   | UM   | UM  | UM  | UM  | UM   | UM  |
| AT5G11510 | UM   | gbM  | UM   | UM  | UM  | UM  | mCHH | UM  |
| AT5G11520 | UM   | UM   | UM   | UM  | UM  | UM  | UM   | UM  |
| AT5G11530 | gbM  | gbM  | gbM  | gbM | gbM | gbM | mCHH | gbM |
| AT5G11540 | UM   | UM   | UM   | UM  | UM  | UM  | UM   | UM  |
| AT5G11550 | UM   | UM   | UM   | UM  | UM  | UM  | UM   | UM  |
| AT5G11560 | gbM  | gbM  | gbM  | gbM | gbM | gbM | gbM  | gbM |
| AT5G11570 | UM   | UM   | UM   | UM  | UM  | UM  | UM   | UM  |
| AT5G11580 | gbM  | gbM  | gbM  | UM  | UM  | UM  | gbM  | UM  |
| AT5G11590 | UM   | UM   | UM   | UM  | UM  | UM  | UM   | UM  |
| AT5G11600 | UM   | UM   | UM   | UM  | UM  | UM  | UM   | UM  |
| AT5G11610 | UM   | UM   | UM   | UM  | UM  | UM  | UM   | UM  |
| AT5G11620 | UM   | UM   | UM   | UM  | UM  | UM  | UM   | UM  |
| AT5G11630 | UM   | UM   | UM   | UM  | UM  | UM  | UM   | UM  |
| AT5G11640 | UM   | UM   | UM   | UM  | UM  | UM  | UM   | UM  |
| AT5G11650 | UM   | UM   | UM   | UM  | UM  | UM  | UM   | UM  |
| AT5G11660 | UM   | UM   | UM   | UM  | UM  | UM  | UM   | UM  |
| AT5G11670 | UM   | UM   | UM   | UM  | UM  | UM  | mCHH | UM  |
| AT5G11680 | UM   | UM   | UM   | UM  | UM  | UM  | UM   | UM  |
| AT5G11690 | UM   | UM   | UM   | UM  | UM  | UM  | UM   | UM  |
| AT5G11700 | gbM  | gbM  | gbM  | gbM | gbM | gbM | gbM  | gbM |
| AT5G11710 | UM   | UM   | UM   | UM  | UM  | UM  | UM   | UM  |
| AT5G11720 | UM   | UM   | UM   | UM  | UM  | UM  | UM   | UM  |
| AT5G11730 | gbM  | gbM  | gbM  | gbM | gbM | gbM | gbM  | gbM |
| AT5G11740 | UM   | UM   | UM   | UM  | UM  | UM  | UM   | UM  |
| AT5G11750 | UM   | UM   | UM   | UM  | UM  | UM  | UM   | UM  |
| AT5G11760 | UM   | UM   | UM   | UM  | UM  | UM  | UM   | UM  |
| AT5G11770 | UM   | UM   | UM   | UM  | UM  | UM  | UM   | UM  |
| AT5G11780 | UM   | UM   | UM   | UM  | UM  | UM  | UM   | UM  |
| AT5G11790 | UM   | UM   | UM   | UM  | UM  | UM  | UM   | UM  |
| AT5G11800 | UM   | UM   | UM   | UM  | UM  | UM  | UM   | UM  |
| AT5G11810 | UM   | UM   | UM   | UM  | UM  | UM  | UM   | UM  |
| AT5G11820 | UM   | UM   | UM   | UM  | UM  | UM  | UM   | UM  |

|           |      |      |      |      |      |      |      |      |
|-----------|------|------|------|------|------|------|------|------|
| AT5G11830 | UM   |
| AT5G11840 | UM   |
| AT5G11850 | UM   |
| AT5G11860 | gbM  | UM   | UM   | gbM  | UM   | gbM  | mCHH | UM   |
| AT5G11870 | UM   |
| AT5G11880 | UM   |
| AT5G11890 | UM   |
| AT5G11900 | UM   |
| AT5G11910 | UM   |
| AT5G11920 | UM   |
| AT5G11930 | UM   | UM   | UM   | UM   | UM   | UM   | mCHH | UM   |
| AT5G11940 | UM   |
| AT5G11950 | UM   |
| AT5G11960 | UM   | mCHH | UM   | UM   | UM   | gbM  | mCHH | UM   |
| AT5G11970 | UM   |
| AT5G11980 | UM   |
| AT5G11990 | UM   |
| AT5G12000 | UM   |
| AT5G12010 | UM   |
| AT5G12020 | UM   |
| AT5G12030 | UM   |
| AT5G12040 | UM   |
| AT5G12043 | UM   |
| AT5G12050 | UM   | UM   | UM   | UM   | UM   | UM   | mCHH | UM   |
| AT5G12060 | UM   |
| AT5G12070 | UM   |
| AT5G12080 | gbM  |
| AT5G12090 | mCHH |
| AT5G12100 | UM   |
| AT5G12110 | UM   |
| AT5G12120 | gbM  |
| AT5G12130 | UM   |
| AT5G12140 | UM   |
| AT5G12150 | gbM  | gbM  | UM   | UM   | UM   | UM   | gbM  | UM   |
| AT5G12170 | UM   |
| AT5G12180 | UM   |
| AT5G12190 | UM   |
| AT5G12200 | UM   |
| AT5G12210 | UM   |
| AT5G12220 | UM   |
| AT5G12230 | UM   |
| AT5G12235 | UM   |
| AT5G12236 | UM   |
| AT5G12240 | UM   |
| AT5G12250 | UM   |
| AT5G12260 | UM   |
| AT5G12270 | UM   |
| AT5G12280 | UM   |









|           |     |     |     |     |     |     |      |     |
|-----------|-----|-----|-----|-----|-----|-----|------|-----|
| AT5G14050 | UM   | UM  |
| AT5G14060 | UM  | UM  | UM  | UM  | UM  | UM  | mCHH | UM  |
| AT5G14070 | UM   | UM  |
| AT5G14080 | UM   | UM  |
| AT5G14090 | UM   | UM  |
| AT5G14100 | UM   | UM  |
| AT5G14105 | UM   | UM  |
| AT5G14110 | UM   | UM  |
| AT5G14120 | UM   | UM  |
| AT5G14130 | UM   | UM  |
| AT5G14140 | UM   | UM  |
| AT5G14150 | UM   | UM  |
| AT5G14160 | UM   | UM  |
| AT5G14170 | gbM  | gbM |
| AT5G14180 | UM   | UM  |
| AT5G14200 | UM   | UM  |
| AT5G14210 | UM   | UM  |
| AT5G14220 | UM  | UM  | UM  | UM  | UM  | UM  | mCHH | UM  |
| AT5G14230 | gbM  | gbM |
| AT5G14240 | UM   | UM  |
| AT5G14250 | UM   | UM  |
| AT5G14260 | UM  | UM  | UM  | UM  | UM  | UM  | gbM  | UM  |
| AT5G14270 | gbM | gbM | gbM | UM  | UM  | gbM | mCHH | UM  |
| AT5G14280 | UM   | UM  |
| AT5G14290 | UM   | UM  |
| AT5G14300 | UM   | UM  |
| AT5G14310 | UM   | UM  |
| AT5G14320 | UM   | UM  |
| AT5G14330 | UM   | UM  |
| AT5G14340 | UM   | UM  |
| AT5G14345 | UM   | UM  |
| AT5G14350 | UM   | UM  |
| AT5G14360 | UM   | UM  |
| AT5G14370 | UM   | UM  |
| AT5G14380 | UM   | UM  |
| AT5G14390 | UM   | UM  |
| AT5G14400 | UM   | UM  |
| AT5G14410 | UM   | UM  |
| AT5G14420 | UM  | gbM | UM  | UM  | UM  | UM  | gbM  | UM  |
| AT5G14430 | UM   | UM  |
| AT5G14440 | UM   | UM  |
| AT5G14450 | UM   | UM  |
| AT5G14460 | UM   | UM  |
| AT5G14470 | UM   | UM  |
| AT5G14480 | gbM | gbM | gbM | gbM | gbM | UM  | gbM  | gbM |
| AT5G14490 | UM   | UM  |
| AT5G14500 | UM   | UM  |
| AT5G14510 | UM   | UM  |

|           |      |      |      |     |     |     |      |     |
|-----------|------|------|------|-----|-----|-----|------|-----|
| AT5G14520 | UM   | gbM  | UM   | UM  | UM  | UM  | UM   | UM  |
| AT5G14530 | UM   | UM   | UM   | UM  | UM  | UM  | UM   | UM  |
| AT5G14540 | gbM  | gbM  | UM   | UM  | UM  | UM  | gbM  | UM  |
| AT5G14550 | UM   | UM   | UM   | UM  | UM  | UM  | UM   | UM  |
| AT5G14560 | UM   | UM   | UM   | UM  | UM  | UM  | UM   | UM  |
| AT5G14570 | UM   | UM   | UM   | UM  | UM  | UM  | UM   | UM  |
| AT5G14580 | gbM  | mCHH | gbM  | gbM | gbM | gbM | mCHH | gbM |
| AT5G14590 | UM   | UM   | UM   | UM  | UM  | UM  | UM   | UM  |
| AT5G14600 | UM   | UM   | UM   | UM  | UM  | UM  | UM   | UM  |
| AT5G14602 | UM   | UM   | UM   | UM  | UM  | UM  | UM   | UM  |
| AT5G14610 | gbM  | gbM  | gbM  | gbM | UM  | gbM | gbM  | UM  |
| AT5G14620 | mCHG | mCHG | mCHG | UM  | UM  | gbM | mCHH | UM  |
| AT5G14640 | UM   | UM   | UM   | UM  | UM  | UM  | UM   | UM  |
| AT5G14650 | gbM  | gbM  | gbM  | gbM | UM  | UM  | gbM  | gbM |
| AT5G14660 | UM   | UM   | UM   | UM  | UM  | UM  | UM   | UM  |
| AT5G14670 | UM   | UM   | UM   | UM  | UM  | UM  | UM   | UM  |
| AT5G14680 | UM   | UM   | UM   | UM  | UM  | UM  | UM   | UM  |
| AT5G14690 | UM   | UM   | UM   | UM  | UM  | UM  | UM   | UM  |
| AT5G14700 | UM   | UM   | UM   | UM  | UM  | UM  | UM   | UM  |
| AT5G14710 | UM   | UM   | UM   | UM  | UM  | UM  | UM   | UM  |
| AT5G14720 | gbM  | UM   | gbM  | UM  | UM  | UM  | gbM  | gbM |
| AT5G14730 | UM   | UM   | UM   | UM  | UM  | UM  | UM   | UM  |
| AT5G14740 | UM   | UM   | UM   | UM  | UM  | UM  | UM   | UM  |
| AT5G14750 | UM   | UM   | UM   | UM  | UM  | UM  | UM   | UM  |
| AT5G14760 | gbM  | gbM  | gbM  | gbM | gbM | gbM | gbM  | gbM |
| AT5G14770 | gbM  | gbM  | gbM  | UM  | gbM | gbM | gbM  | UM  |
| AT5G14780 | UM   | UM   | UM   | UM  | UM  | UM  | UM   | UM  |
| AT5G14790 | gbM  | gbM  | gbM  | gbM | gbM | gbM | gbM  | gbM |
| AT5G14800 | UM   | UM   | UM   | UM  | UM  | UM  | UM   | UM  |
| AT5G14820 | UM   | UM   | UM   | UM  | UM  | UM  | UM   | UM  |
| AT5G14850 | UM   | mCHH | UM   | UM  | UM  | UM  | UM   | UM  |
| AT5G14860 | UM   | UM   | UM   | UM  | UM  | UM  | UM   | UM  |
| AT5G14870 | UM   | UM   | UM   | UM  | UM  | UM  | UM   | UM  |
| AT5G14880 | UM   | UM   | UM   | UM  | UM  | UM  | UM   | UM  |
| AT5G14890 | UM   | UM   | UM   | UM  | UM  | UM  | UM   | UM  |
| AT5G14900 | UM   | UM   | UM   | UM  | UM  | UM  | UM   | UM  |
| AT5G14910 | UM   | UM   | UM   | UM  | UM  | UM  | UM   | UM  |
| AT5G14920 | UM   | UM   | UM   | UM  | UM  | UM  | UM   | UM  |
| AT5G14930 | UM   | UM   | UM   | UM  | UM  | UM  | UM   | UM  |
| AT5G14940 | UM   | UM   | UM   | UM  | UM  | UM  | UM   | UM  |
| AT5G14950 | gbM  | gbM  | gbM  | gbM | gbM | gbM | gbM  | gbM |
| AT5G14960 | UM   | UM   | UM   | UM  | UM  | UM  | UM   | UM  |
| AT5G14970 | UM   | UM   | UM   | UM  | UM  | UM  | UM   | UM  |
| AT5G14980 | UM   | UM   | UM   | UM  | UM  | UM  | UM   | UM  |
| AT5G14990 | UM   | UM   | UM   | UM  | UM  | UM  | UM   | UM  |
| AT5G14995 | UM   | UM   | UM   | UM  | UM  | UM  | UM   | UM  |
| AT5G15000 | UM   | UM   | UM   | UM  | UM  | UM  | UM   | UM  |
| AT5G15008 | UM   | UM   | UM   | UM  | UM  | UM  | UM   | UM  |

|           |      |      |      |      |      |      |      |      |
|-----------|------|------|------|------|------|------|------|------|
| AT5G15010 | UM   | gbM  | gbM  | UM   | UM   | UM   | mCHH | UM   |
| AT5G15020 | gbM  | mCHH | gbM  | gbM  | gbM  | gbM  | mCHH | gbM  |
| AT5G15030 | UM   | UM   | UM   | UM   | UM   | UM   | mCHH | UM   |
| AT5G15040 | UM   |
| AT5G15050 | UM   |
| AT5G15060 | UM   |
| AT5G15070 | UM   | UM   | UM   | UM   | UM   | UM   | mCHH | UM   |
| AT5G15080 | gbM  | gbM  | UM   | gbM  | gbM  | gbM  | UM   | UM   |
| AT5G15090 | UM   |
| AT5G15100 | UM   |
| AT5G15110 | UM   |
| AT5G15120 | UM   |
| AT5G15130 | UM   |
| AT5G15140 | UM   | mCHH | UM   | UM   | UM   | UM   | UM   | UM   |
| AT5G15150 | UM   |
| AT5G15160 | UM   |
| AT5G15170 | gbM  | gbM  | gbM  | UM   | UM   | UM   | gbM  | gbM  |
| AT5G15180 | UM   |
| AT5G15190 | UM   |
| AT5G15200 | UM   |
| AT5G15210 | UM   |
| AT5G15220 | UM   |
| AT5G15230 | UM   |
| AT5G15240 | UM   |
| AT5G15250 | UM   |
| AT5G15254 | UM   |
| AT5G15260 | UM   |
| AT5G15265 | UM   |
| AT5G15270 | gbM  | gbM  | gbM  | gbM  | gbM  | gbM  | mCHH | gbM  |
| AT5G15280 | gbM  | gbM  | gbM  | gbM  | gbM  | gbM  | mCHH | gbM  |
| AT5G15290 | UM   |
| AT5G15300 | UM   |
| AT5G15310 | UM   |
| AT5G15320 | UM   |
| AT5G15330 | UM   |
| AT5G15340 | UM   |
| AT5G15350 | UM   |
| AT5G15360 | mCHH |
| AT5G15380 | UM   |
| AT5G15390 | UM   |
| AT5G15400 | gbM  |
| AT5G15410 | UM   |
| AT5G15420 | mCHH | mCHH | mCHH | mCHG | mCHG | mCHG | mCHH | mCHG |
| AT5G15430 | UM   | UM   | UM   | UM   | UM   | UM   | mCHH | UM   |
| AT5G15440 | gbM  |
| AT5G15450 | gbM  | mCHH | gbM  | gbM  | gbM  | gbM  | gbM  | gbM  |
| AT5G15460 | gbM  | gbM  | UM   | UM   | UM   | UM   | gbM  | UM   |
| AT5G15470 | UM   | gbM  | gbM  | UM   | UM   | UM   | UM   | UM   |

|           |      |      |      |      |      |      |      |      |
|-----------|------|------|------|------|------|------|------|------|
| AT5G15480 | UM   |
| AT5G15490 | gbM  | gbM  | gbM  | gbM  | UM   | UM   | gbM  | UM   |
| AT5G15500 | UM   |
| AT5G15510 | UM   |
| AT5G15520 | UM   |
| AT5G15530 | UM   |
| AT5G15540 | gbM  | mCHH | gbM  | gbM  | gbM  | gbM  | mCHH | gbM  |
| AT5G15550 | UM   |
| AT5G15560 | UM   | UM   | UM   | UM   | UM   | UM   | mCHH | UM   |
| AT5G15570 | gbM  | mCHH | gbM  | gbM  | gbM  | gbM  | gbM  | gbM  |
| AT5G15580 | UM   |
| AT5G15581 | UM   |
| AT5G15600 | UM   |
| AT5G15610 | UM   |
| AT5G15620 | UM   |
| AT5G15630 | UM   |
| AT5G15640 | UM   |
| AT5G15650 | UM   |
| AT5G15660 | UM   |
| AT5G15670 | UM   |
| AT5G15680 | gbM  | mCHH | gbM  | gbM  | gbM  | gbM  | mCHH | gbM  |
| AT5G15690 | mCHH |
| AT5G15700 | gbM  | gbM  | gbM  | UM   | UM   | UM   | gbM  | gbM  |
| AT5G15710 | UM   |
| AT5G15720 | UM   | gbM  | UM   | UM   | UM   | UM   | UM   | UM   |
| AT5G15725 | UM   |
| AT5G15730 | gbM  | gbM  | gbM  | UM   | gbM  | gbM  | gbM  | gbM  |
| AT5G15740 | UM   |
| AT5G15750 | UM   |
| AT5G15760 | UM   |
| AT5G15770 | UM   |
| AT5G15780 | UM   | mCHG | mCHG | UM   | UM   | UM   | mCHH | UM   |
| AT5G15790 | UM   | gbM  | UM   | UM   | UM   | UM   | UM   | UM   |
| AT5G15800 | UM   |
| AT5G15802 | UM   |
| AT5G15810 | gbM  | mCHH | gbM  | gbM  | gbM  | gbM  | mCHH | gbM  |
| AT5G15820 | UM   |
| AT5G15830 | UM   |
| AT5G15840 | UM   |
| AT5G15850 | UM   |
| AT5G15853 | UM   |
| AT5G15860 | UM   |
| AT5G15870 | UM   |
| AT5G15880 | UM   |
| AT5G15890 | gbM  | gbM  | gbM  | gbM  | gbM  | gbM  | mCHG | gbM  |
| AT5G15900 | UM   |
| AT5G15910 | UM   |
| AT5G15920 | gbM  | mCHH | gbM  | gbM  | gbM  | gbM  | mCHH | gbM  |

|           |     |      |     |     |     |     |      |     |
|-----------|-----|------|-----|-----|-----|-----|------|-----|
| AT5G15930 | UM  | UM   | gbM | gbM | UM  | gbM | gbM  | gbM |
| AT5G15940 | UM  | UM   | UM  | UM  | UM  | UM  | UM   | UM  |
| AT5G15948 | UM  | UM   | UM  | UM  | UM  | UM  | UM   | UM  |
| AT5G15950 | UM  | UM   | UM  | UM  | UM  | UM  | UM   | UM  |
| AT5G15960 | UM  | UM   | UM  | UM  | UM  | UM  | UM   | UM  |
| AT5G15970 | UM  | UM   | UM  | UM  | UM  | UM  | UM   | UM  |
| AT5G15980 | UM  | UM   | UM  | UM  | UM  | UM  | UM   | UM  |
| AT5G16000 | UM  | UM   | UM  | UM  | UM  | UM  | UM   | UM  |
| AT5G16010 | UM  | UM   | UM  | UM  | UM  | UM  | UM   | UM  |
| AT5G16020 | UM  | UM   | UM  | UM  | UM  | UM  | mCHH | UM  |
| AT5G16023 | UM  | UM   | UM  | UM  | UM  | UM  | UM   | UM  |
| AT5G16030 | UM  | UM   | UM  | UM  | UM  | UM  | mCHH | UM  |
| AT5G16040 | UM  | UM   | UM  | UM  | UM  | UM  | gbM  | UM  |
| AT5G16050 | UM  | UM   | UM  | UM  | UM  | UM  | UM   | UM  |
| AT5G16060 | UM  | UM   | UM  | UM  | UM  | UM  | UM   | UM  |
| AT5G16070 | gbM | gbM  | gbM | UM  | UM  | UM  | UM   | UM  |
| AT5G16080 | UM  | UM   | UM  | UM  | UM  | UM  | UM   | UM  |
| AT5G16090 | UM  | UM   | UM  | UM  | UM  | UM  | UM   | UM  |
| AT5G16100 | UM  | UM   | UM  | UM  | UM  | UM  | UM   | UM  |
| AT5G16110 | UM  | UM   | UM  | UM  | UM  | UM  | UM   | UM  |
| AT5G16120 | UM  | UM   | UM  | gbM | UM  | UM  | UM   | UM  |
| AT5G16130 | UM  | UM   | UM  | UM  | UM  | UM  | UM   | UM  |
| AT5G16140 | UM  | UM   | UM  | UM  | UM  | UM  | UM   | UM  |
| AT5G16150 | UM  | UM   | UM  | UM  | UM  | UM  | UM   | UM  |
| AT5G16160 | UM  | UM   | UM  | UM  | UM  | UM  | UM   | UM  |
| AT5G16170 | UM  | UM   | UM  | UM  | UM  | UM  | UM   | UM  |
| AT5G16180 | UM  | UM   | UM  | UM  | UM  | UM  | UM   | UM  |
| AT5G16190 | UM  | UM   | UM  | UM  | UM  | UM  | UM   | UM  |
| AT5G16200 | UM  | UM   | UM  | UM  | UM  | UM  | UM   | UM  |
| AT5G16210 | gbM | mCHH | gbM | gbM | gbM | gbM | gbM  | gbM |
| AT5G16220 | UM  | UM   | UM  | UM  | UM  | UM  | UM   | UM  |
| AT5G16230 | UM  | UM   | UM  | UM  | UM  | UM  | UM   | UM  |
| AT5G16240 | UM  | UM   | UM  | UM  | UM  | UM  | UM   | UM  |
| AT5G16250 | UM  | UM   | UM  | UM  | UM  | UM  | UM   | UM  |
| AT5G16260 | gbM | gbM  | gbM | gbM | UM  | gbM | gbM  | gbM |
| AT5G16270 | gbM | gbM  | gbM | gbM | gbM | gbM | mCHH | gbM |
| AT5G16280 | gbM | mCHH | gbM | gbM | gbM | gbM | mCHH | gbM |
| AT5G16285 | UM  | UM   | UM  | UM  | UM  | UM  | UM   | UM  |
| AT5G16286 | UM  | UM   | UM  | UM  | UM  | UM  | UM   | UM  |
| AT5G16290 | UM  | UM   | UM  | UM  | UM  | UM  | UM   | UM  |
| AT5G16300 | UM  | UM   | UM  | UM  | UM  | UM  | UM   | UM  |
| AT5G16310 | UM  | UM   | UM  | UM  | UM  | UM  | UM   | UM  |
| AT5G16320 | UM  | UM   | UM  | UM  | UM  | UM  | UM   | UM  |
| AT5G16330 | UM  | UM   | UM  | UM  | UM  | UM  | UM   | UM  |
| AT5G16340 | UM  | UM   | UM  | UM  | UM  | UM  | UM   | UM  |
| AT5G16350 | UM  | UM   | UM  | UM  | UM  | UM  | UM   | UM  |
| AT5G16360 | UM  | UM   | UM  | UM  | UM  | UM  | UM   | UM  |
| AT5G16370 | UM  | UM   | UM  | UM  | UM  | UM  | UM   | UM  |









|           |      |      |     |     |     |     |      |     |
|-----------|------|------|-----|-----|-----|-----|------|-----|
| AT5G17740 | UM   | UM   | UM  | UM  | UM  | UM  | UM   | UM  |
| AT5G17750 | UM   | UM   | UM  | UM  | UM  | UM  | UM   | UM  |
| AT5G17760 | UM   | UM   | UM  | UM  | UM  | UM  | UM   | UM  |
| AT5G17770 | UM   | UM   | UM  | UM  | UM  | UM  | UM   | UM  |
| AT5G17780 | UM   | UM   | UM  | UM  | UM  | UM  | UM   | UM  |
| AT5G17790 | gbM  | gbM  | UM  | UM  | UM  | UM  | mCHH | UM  |
| AT5G17795 | UM   | UM   | UM  | UM  | UM  | UM  | UM   | UM  |
| AT5G17800 | UM   | UM   | UM  | UM  | UM  | UM  | UM   | UM  |
| AT5G17810 | UM   | UM   | UM  | UM  | UM  | UM  | UM   | UM  |
| AT5G17820 | UM   | UM   | UM  | UM  | UM  | UM  | UM   | UM  |
| AT5G17830 | UM   | UM   | UM  | UM  | UM  | UM  | UM   | UM  |
| AT5G17840 | UM   | UM   | UM  | UM  | UM  | UM  | UM   | UM  |
| AT5G17847 | UM   | UM   | UM  | UM  | UM  | UM  | UM   | UM  |
| AT5G17850 | gbM  | gbM  | gbM | gbM | gbM | gbM | gbM  | gbM |
| AT5G17860 | UM   | UM   | UM  | UM  | UM  | UM  | UM   | UM  |
| AT5G17870 | UM   | UM   | UM  | UM  | UM  | UM  | UM   | UM  |
| AT5G17880 | UM   | UM   | UM  | UM  | UM  | UM  | UM   | UM  |
| AT5G17890 | UM   | mCHH | UM  | UM  | UM  | UM  | mCHH | UM  |
| AT5G17900 | mCHH | mCHH | gbM | UM  | UM  | UM  | mCHH | UM  |
| AT5G17910 | gbM  | mCHH | UM  | UM  | UM  | UM  | mCHH | UM  |
| AT5G17920 | UM   | UM   | UM  | UM  | UM  | UM  | UM   | UM  |
| AT5G17930 | mCHH | mCHH | gbM | gbM | gbM | gbM | mCHH | gbM |
| AT5G17950 | UM   | UM   | UM  | UM  | UM  | UM  | UM   | UM  |
| AT5G17960 | UM   | UM   | UM  | UM  | UM  | UM  | UM   | UM  |
| AT5G17970 | UM   | UM   | UM  | UM  | UM  | UM  | UM   | UM  |
| AT5G17980 | UM   | UM   | UM  | UM  | UM  | UM  | UM   | UM  |
| AT5G17990 | UM   | UM   | UM  | UM  | UM  | UM  | UM   | UM  |
| AT5G18000 | UM   | UM   | UM  | UM  | UM  | UM  | UM   | UM  |
| AT5G18010 | UM   | UM   | UM  | UM  | UM  | UM  | UM   | UM  |
| AT5G18020 | UM   | UM   | UM  | UM  | UM  | UM  | UM   | UM  |
| AT5G18030 | UM   | UM   | UM  | UM  | UM  | UM  | UM   | UM  |
| AT5G18037 | UM   | UM   | UM  | UM  | UM  | UM  | UM   | UM  |
| AT5G18040 | UM   | UM   | UM  | UM  | UM  | UM  | UM   | UM  |
| AT5G18050 | UM   | UM   | UM  | UM  | UM  | UM  | UM   | UM  |
| AT5G18060 | UM   | UM   | UM  | UM  | UM  | UM  | UM   | UM  |
| AT5G18065 | UM   | UM   | UM  | UM  | UM  | UM  | UM   | UM  |
| AT5G18070 | UM   | UM   | UM  | UM  | UM  | UM  | UM   | UM  |
| AT5G18080 | UM   | UM   | UM  | UM  | UM  | UM  | UM   | UM  |
| AT5G18090 | UM   | UM   | UM  | UM  | UM  | UM  | UM   | UM  |
| AT5G18100 | UM   | UM   | UM  | UM  | UM  | UM  | UM   | UM  |
| AT5G18110 | gbM  | gbM  | gbM | UM  | UM  | UM  | gbM  | UM  |
| AT5G18120 | UM   | UM   | UM  | UM  | UM  | UM  | UM   | UM  |
| AT5G18130 | UM   | UM   | UM  | UM  | UM  | UM  | UM   | UM  |
| AT5G18140 | UM   | UM   | UM  | UM  | UM  | UM  | UM   | UM  |
| AT5G18150 | UM   | UM   | UM  | UM  | UM  | UM  | UM   | UM  |
| AT5G18160 | UM   | UM   | UM  | UM  | UM  | UM  | UM   | UM  |
| AT5G18170 | UM   | UM   | UM  | UM  | UM  | UM  | UM   | UM  |
| AT5G18180 | UM   | UM   | UM  | UM  | UM  | UM  | UM   | UM  |

|           |     |     |     |     |     |     |      |     |
|-----------|-----|-----|-----|-----|-----|-----|------|-----|
| AT5G18190 | gbM  | gbM |
| AT5G18200 | UM   | UM  |
| AT5G18210 | UM   | UM  |
| AT5G18220 | UM   | UM  |
| AT5G18230 | gbM  | gbM |
| AT5G18240 | UM   | UM  |
| AT5G18250 | UM   | UM  |
| AT5G18260 | UM   | UM  |
| AT5G18270 | UM   | UM  |
| AT5G18280 | UM   | UM  |
| AT5G18290 | UM   | UM  |
| AT5G18300 | UM   | UM  |
| AT5G18310 | UM   | UM  |
| AT5G18320 | UM   | UM  |
| AT5G18330 | UM   | UM  |
| AT5G18340 | UM   | UM  |
| AT5G18350 | UM   | UM  |
| AT5G18360 | UM   | UM  |
| AT5G18362 | UM   | UM  |
| AT5G18370 | UM  | UM  | UM  | UM  | UM  | UM  | mCHH | UM  |
| AT5G18380 | UM   | UM  |
| AT5G18390 | UM   | UM  |
| AT5G18400 | gbM  | gbM |
| AT5G18403 | UM   | UM  |
| AT5G18404 | UM   | UM  |
| AT5G18407 | UM   | UM  |
| AT5G18410 | gbM | gbM | gbM | gbM | gbM | gbM | mCHH | gbM |
| AT5G18420 | UM  | UM  | UM  | UM  | gbM | UM  | UM   | UM  |
| AT5G18430 | UM   | UM  |
| AT5G18440 | UM   | UM  |
| AT5G18450 | UM   | UM  |
| AT5G18460 | UM  | UM  | UM  | UM  | UM  | UM  | mCHH | UM  |
| AT5G18470 | UM   | UM  |
| AT5G18475 | gbM | gbM | gbM | gbM | UM  | UM  | gbM  | gbM |
| AT5G18480 | UM   | UM  |
| AT5G18490 | UM   | UM  |
| AT5G18500 | gbM  | gbM |
| AT5G18510 | UM   | UM  |
| AT5G18520 | UM   | UM  |
| AT5G18525 | gbM  | gbM |
| AT5G18540 | UM   | UM  |
| AT5G18550 | UM   | UM  |
| AT5G18560 | UM   | UM  |
| AT5G18570 | UM   | UM  |
| AT5G18580 | gbM | gbM | gbM | UM  | UM  | gbM | gbM  | UM  |
| AT5G18590 | gbM  | gbM |
| AT5G18600 | UM   | UM  |
| AT5G18610 | gbM  | gbM |



|           |      |      |     |     |     |     |      |     |
|-----------|------|------|-----|-----|-----|-----|------|-----|
| AT5G19060 | UM   | UM   | UM  | UM  | UM  | UM  | UM   | UM  |
| AT5G19070 | gbM  | gbM  | gbM | UM  | gbM | UM  | gbM  | gbM |
| AT5G19080 | UM   | UM   | UM  | UM  | UM  | UM  | UM   | UM  |
| AT5G19090 | UM   | UM   | UM  | UM  | UM  | UM  | UM   | UM  |
| AT5G19100 | UM   | UM   | UM  | UM  | UM  | UM  | UM   | UM  |
| AT5G19110 | UM   | UM   | UM  | UM  | UM  | UM  | UM   | UM  |
| AT5G19120 | UM   | UM   | UM  | UM  | UM  | UM  | UM   | UM  |
| AT5G19130 | gbM  | gbM  | gbM | gbM | UM  | gbM | gbM  | UM  |
| AT5G19140 | UM   | UM   | UM  | UM  | UM  | UM  | UM   | UM  |
| AT5G19150 | UM   | UM   | UM  | UM  | UM  | UM  | UM   | UM  |
| AT5G19151 | UM   | UM   | UM  | UM  | UM  | UM  | UM   | UM  |
| AT5G19160 | UM   | UM   | UM  | UM  | UM  | UM  | UM   | UM  |
| AT5G19170 | UM   | UM   | UM  | UM  | UM  | UM  | UM   | UM  |
| AT5G19172 | UM   | UM   | UM  | UM  | UM  | UM  | UM   | UM  |
| AT5G19175 | UM   | UM   | UM  | UM  | UM  | UM  | UM   | UM  |
| AT5G19180 | UM   | UM   | UM  | UM  | UM  | UM  | UM   | UM  |
| AT5G19190 | UM   | UM   | UM  | UM  | UM  | UM  | UM   | UM  |
| AT5G19200 | UM   | UM   | UM  | UM  | UM  | UM  | UM   | UM  |
| AT5G19210 | UM   | UM   | UM  | UM  | UM  | UM  | UM   | UM  |
| AT5G19220 | UM   | UM   | UM  | UM  | UM  | UM  | UM   | UM  |
| AT5G19230 | UM   | UM   | UM  | UM  | UM  | UM  | UM   | UM  |
| AT5G19240 | UM   | UM   | UM  | UM  | UM  | UM  | UM   | UM  |
| AT5G19250 | UM   | UM   | UM  | UM  | UM  | UM  | UM   | UM  |
| AT5G19257 | UM   | UM   | UM  | UM  | UM  | UM  | UM   | UM  |
| AT5G19260 | UM   | UM   | UM  | UM  | UM  | UM  | UM   | UM  |
| AT5G19270 | UM   | UM   | UM  | UM  | UM  | UM  | UM   | UM  |
| AT5G19280 | gbM  | gbM  | gbM | gbM | gbM | gbM | mCHH | gbM |
| AT5G19290 | UM   | UM   | UM  | UM  | UM  | UM  | UM   | UM  |
| AT5G19300 | UM   | UM   | UM  | UM  | UM  | UM  | mCHH | UM  |
| AT5G19310 | mCHH | mCHH | gbM | gbM | gbM | gbM | mCHH | gbM |
| AT5G19315 | UM   | UM   | UM  | UM  | UM  | UM  | UM   | UM  |
| AT5G19320 | gbM  | gbM  | gbM | gbM | gbM | gbM | gbM  | gbM |
| AT5G19330 | UM   | UM   | UM  | UM  | UM  | UM  | UM   | UM  |
| AT5G19340 | UM   | UM   | UM  | UM  | UM  | UM  | mCHH | UM  |
| AT5G19350 | UM   | UM   | UM  | UM  | UM  | UM  | mCHH | UM  |
| AT5G19360 | UM   | UM   | UM  | UM  | UM  | UM  | UM   | UM  |
| AT5G19370 | UM   | UM   | UM  | UM  | UM  | UM  | UM   | UM  |
| AT5G19380 | UM   | UM   | UM  | UM  | UM  | UM  | UM   | UM  |
| AT5G19390 | gbM  | mCHH | gbM | gbM | gbM | gbM | mCHH | gbM |
| AT5G19400 | gbM  | gbM  | gbM | gbM | gbM | gbM | gbM  | gbM |
| AT5G19410 | UM   | UM   | UM  | UM  | UM  | UM  | UM   | UM  |
| AT5G19420 | gbM  | gbM  | gbM | gbM | gbM | gbM | mCHH | gbM |
| AT5G19430 | UM   | UM   | UM  | UM  | UM  | UM  | UM   | UM  |
| AT5G19440 | UM   | UM   | UM  | UM  | UM  | UM  | UM   | UM  |
| AT5G19450 | gbM  | gbM  | gbM | UM  | gbM | gbM | gbM  | gbM |
| AT5G19460 | UM   | UM   | UM  | UM  | UM  | UM  | UM   | UM  |
| AT5G19470 | UM   | UM   | UM  | UM  | UM  | UM  | UM   | UM  |
| AT5G19473 | UM   | UM   | UM  | UM  | UM  | UM  | UM   | UM  |

|           |      |      |      |     |     |     |      |     |
|-----------|------|------|------|-----|-----|-----|------|-----|
| AT5G19480 | UM   | UM   | UM   | UM  | UM  | UM  | UM   | UM  |
| AT5G19485 | UM   | UM   | UM   | UM  | UM  | UM  | UM   | UM  |
| AT5G19490 | UM   | UM   | UM   | UM  | UM  | UM  | UM   | UM  |
| AT5G19500 | UM   | UM   | UM   | UM  | UM  | UM  | mCHH | UM  |
| AT5G19510 | UM   | UM   | UM   | UM  | UM  | UM  | UM   | UM  |
| AT5G19520 | UM   | UM   | UM   | UM  | UM  | UM  | UM   | UM  |
| AT5G19530 | UM   | UM   | UM   | UM  | UM  | UM  | UM   | UM  |
| AT5G19540 | UM   | UM   | UM   | UM  | UM  | UM  | UM   | UM  |
| AT5G19550 | UM   | mCHH | UM   | UM  | UM  | UM  | UM   | UM  |
| AT5G19560 | UM   | UM   | UM   | UM  | UM  | UM  | UM   | UM  |
| AT5G19570 | UM   | UM   | UM   | UM  | UM  | UM  | UM   | UM  |
| AT5G19580 | UM   | UM   | UM   | UM  | UM  | UM  | UM   | UM  |
| AT5G19590 | UM   | UM   | UM   | UM  | UM  | UM  | UM   | UM  |
| AT5G19600 | UM   | UM   | UM   | UM  | UM  | UM  | mCHH | UM  |
| AT5G19610 | UM   | UM   | UM   | UM  | UM  | UM  | mCHH | gbM |
| AT5G19620 | gbM  | gbM  | gbM  | gbM | gbM | gbM | gbM  | gbM |
| AT5G19630 | UM   | UM   | UM   | UM  | UM  | UM  | UM   | UM  |
| AT5G19640 | UM   | UM   | UM   | UM  | UM  | UM  | UM   | UM  |
| AT5G19650 | UM   | UM   | UM   | UM  | UM  | UM  | UM   | UM  |
| AT5G19660 | UM   | gbM  | UM   | UM  | UM  | UM  | UM   | UM  |
| AT5G19670 | gbM  | gbM  | gbM  | UM  | UM  | gbM | gbM  | UM  |
| AT5G19680 | UM   | UM   | UM   | UM  | UM  | UM  | UM   | UM  |
| AT5G19690 | gbM  | gbM  | gbM  | gbM | UM  | gbM | mCHH | gbM |
| AT5G19700 | UM   | UM   | UM   | UM  | UM  | UM  | UM   | UM  |
| AT5G19710 | UM   | UM   | UM   | UM  | UM  | UM  | UM   | UM  |
| AT5G19720 | UM   | UM   | UM   | UM  | UM  | UM  | UM   | UM  |
| AT5G19729 | UM   | UM   | UM   | UM  | UM  | UM  | UM   | UM  |
| AT5G19730 | UM   | UM   | UM   | UM  | UM  | UM  | UM   | UM  |
| AT5G19740 | UM   | UM   | UM   | UM  | UM  | UM  | mCHG | UM  |
| AT5G19750 | UM   | UM   | UM   | UM  | UM  | UM  | UM   | UM  |
| AT5G19760 | UM   | gbM  | UM   | UM  | UM  | UM  | UM   | gbM |
| AT5G19770 | UM   | UM   | UM   | UM  | UM  | UM  | UM   | UM  |
| AT5G19780 | UM   | UM   | UM   | UM  | UM  | UM  | UM   | UM  |
| AT5G19790 | UM   | UM   | UM   | UM  | UM  | UM  | UM   | UM  |
| AT5G19800 | UM   | UM   | UM   | UM  | UM  | UM  | UM   | UM  |
| AT5G19810 | mCHG | mCHH | mCHG | UM  | UM  | UM  | mCHH | UM  |
| AT5G19820 | UM   | UM   | UM   | UM  | UM  | UM  | mCHH | UM  |
| AT5G19830 | UM   | UM   | UM   | UM  | UM  | UM  | UM   | UM  |
| AT5G19840 | gbM  | gbM  | gbM  | UM  | gbM | gbM | gbM  | gbM |
| AT5G19850 | UM   | UM   | UM   | UM  | UM  | UM  | UM   | UM  |
| AT5G19855 | UM   | UM   | UM   | UM  | UM  | UM  | UM   | UM  |
| AT5G19860 | UM   | UM   | UM   | UM  | UM  | UM  | UM   | UM  |
| AT5G19870 | UM   | UM   | UM   | UM  | UM  | UM  | UM   | UM  |
| AT5G19875 | UM   | UM   | UM   | UM  | UM  | UM  | UM   | UM  |
| AT5G19880 | UM   | UM   | UM   | UM  | UM  | UM  | UM   | UM  |
| AT5G19890 | UM   | UM   | UM   | UM  | UM  | UM  | UM   | UM  |
| AT5G19900 | UM   | UM   | UM   | UM  | UM  | UM  | UM   | UM  |
| AT5G19910 | UM   | UM   | UM   | UM  | UM  | UM  | UM   | UM  |



|           |     |     |     |     |     |     |      |     |
|-----------|-----|-----|-----|-----|-----|-----|------|-----|
| AT5G19920 | gbM  | gbM |
| AT5G19930 | UM   | UM  |
| AT5G19940 | UM   | UM  |
| AT5G19950 | UM   | UM  |
| AT5G19960 | UM   | UM  |
| AT5G19970 | UM   | UM  |
| AT5G19980 | UM   | UM  |
| AT5G19990 | UM   | UM  |
| AT5G20000 | UM   | UM  |
| AT5G20010 | UM   | UM  |
| AT5G20020 | UM   | UM  |
| AT5G20030 | UM  | gbM | UM  | UM  | UM  | UM  | UM   | UM  |
| AT5G20040 | UM  | gbM | UM  | UM  | UM  | UM  | gbM  | UM  |
| AT5G20045 | UM   | UM  |
| AT5G20050 | UM  | gbM | UM  | UM  | UM  | UM  | gbM  | UM  |
| AT5G20060 | UM   | UM  |
| AT5G20070 | UM   | UM  |
| AT5G20080 | UM   | UM  |
| AT5G20090 | UM   | UM  |
| AT5G20100 | UM   | UM  |
| AT5G20110 | UM   | UM  |
| AT5G20120 | UM   | UM  |
| AT5G20130 | UM   | UM  |
| AT5G20140 | UM   | UM  |
| AT5G20150 | UM   | UM  |
| AT5G20160 | UM   | UM  |
| AT5G20165 | UM   | UM  |
| AT5G20170 | gbM  | gbM |
| AT5G20180 | UM   | UM  |
| AT5G20181 | UM   | UM  |
| AT5G20190 | UM   | UM  |
| AT5G20200 | gbM | gbM | gbM | gbM | gbM | gbM | mCHH | gbM |
| AT5G20220 | UM   | UM  |
| AT5G20230 | UM   | UM  |
| AT5G20240 | UM   | UM  |
| AT5G20250 | UM   | UM  |
| AT5G20260 | UM   | UM  |
| AT5G20270 | UM   | UM  |
| AT5G20280 | UM   | UM  |
| AT5G20290 | UM   | UM  |
| AT5G20300 | gbM  | gbM |
| AT5G20310 | UM   | UM  |
| AT5G20320 | gbM | gbM | gbM | gbM | gbM | gbM | mCHH | gbM |
| AT5G20330 | UM   | UM  |
| AT5G20340 | UM   | UM  |
| AT5G20350 | gbM | gbM | UM  | UM  | UM  | UM  | gbM  | UM  |
| AT5G20360 | UM  | UM  | UM  | UM  | UM  | UM  | mCHH | UM  |
| AT5G20370 | UM   | UM  |

|           |      |      |      |     |     |     |      |     |
|-----------|------|------|------|-----|-----|-----|------|-----|
| AT5G20380 | UM   | mCHH | UM   | UM  | UM  | UM  | UM   | UM  |
| AT5G20390 | UM   | UM   | UM   | UM  | UM  | UM  | UM   | UM  |
| AT5G20400 | UM   | UM   | UM   | UM  | UM  | UM  | UM   | UM  |
| AT5G20410 | UM   | UM   | UM   | UM  | UM  | UM  | UM   | UM  |
| AT5G20420 | UM   | UM   | UM   | UM  | UM  | UM  | UM   | UM  |
| AT5G20430 | UM   | UM   | UM   | UM  | UM  | UM  | UM   | UM  |
| AT5G20440 | UM   | UM   | UM   | UM  | UM  | UM  | UM   | UM  |
| AT5G20447 | UM   | UM   | UM   | UM  | UM  | UM  | UM   | UM  |
| AT5G20450 | UM   | gbM  | UM   | UM  | UM  | gbM | UM   | UM  |
| AT5G20460 | UM   | UM   | mCHH | UM  | UM  | UM  | UM   | UM  |
| AT5G20470 | UM   | UM   | UM   | UM  | UM  | UM  | UM   | UM  |
| AT5G20480 | UM   | mCHH | UM   | UM  | UM  | UM  | UM   | UM  |
| AT5G20490 | gbM  | mCHH | gbM  | gbM | gbM | gbM | mCHH | gbM |
| AT5G20500 | UM   | UM   | UM   | UM  | UM  | UM  | UM   | UM  |
| AT5G20510 | UM   | UM   | UM   | UM  | UM  | UM  | UM   | UM  |
| AT5G20520 | UM   | UM   | UM   | UM  | UM  | UM  | UM   | UM  |
| AT5G20540 | UM   | UM   | UM   | UM  | UM  | UM  | UM   | UM  |
| AT5G20550 | UM   | UM   | UM   | UM  | UM  | UM  | UM   | UM  |
| AT5G20560 | UM   | UM   | UM   | UM  | UM  | UM  | UM   | UM  |
| AT5G20570 | UM   | UM   | UM   | UM  | UM  | UM  | UM   | UM  |
| AT5G20580 | UM   | UM   | UM   | UM  | UM  | UM  | UM   | UM  |
| AT5G20590 | UM   | UM   | UM   | UM  | UM  | UM  | UM   | UM  |
| AT5G20600 | UM   | UM   | UM   | UM  | UM  | UM  | UM   | UM  |
| AT5G20610 | mCHH | mCHH | gbM  | gbM | gbM | gbM | mCHH | gbM |
| AT5G20620 | UM   | UM   | UM   | UM  | UM  | UM  | UM   | UM  |
| AT5G20630 | UM   | UM   | UM   | UM  | UM  | UM  | UM   | UM  |
| AT5G20635 | UM   | UM   | UM   | UM  | UM  | UM  | UM   | UM  |
| AT5G20640 | UM   | UM   | UM   | UM  | UM  | UM  | UM   | UM  |
| AT5G20650 | UM   | UM   | UM   | UM  | UM  | UM  | UM   | UM  |
| AT5G20660 | gbM  | mCHH | gbM  | gbM | gbM | gbM | mCHH | gbM |
| AT5G20670 | UM   | UM   | UM   | UM  | UM  | UM  | UM   | UM  |
| AT5G20680 | gbM  | gbM  | gbM  | gbM | gbM | gbM | gbM  | gbM |
| AT5G20690 | UM   | UM   | UM   | UM  | UM  | UM  | UM   | UM  |
| AT5G20700 | UM   | UM   | UM   | UM  | UM  | UM  | UM   | UM  |
| AT5G20710 | UM   | UM   | UM   | UM  | UM  | UM  | UM   | UM  |
| AT5G20720 | UM   | UM   | UM   | UM  | UM  | UM  | UM   | UM  |
| AT5G20730 | gbM  | gbM  | gbM  | gbM | gbM | gbM | gbM  | gbM |
| AT5G20736 | UM   | UM   | UM   | UM  | UM  | UM  | UM   | UM  |
| AT5G20740 | UM   | UM   | UM   | UM  | UM  | UM  | UM   | UM  |
| AT5G20790 | UM   | UM   | UM   | UM  | UM  | UM  | UM   | UM  |
| AT5G20810 | UM   | UM   | UM   | UM  | UM  | UM  | UM   | UM  |
| AT5G20820 | UM   | UM   | UM   | UM  | UM  | UM  | UM   | UM  |
| AT5G20830 | UM   | UM   | UM   | UM  | UM  | UM  | UM   | UM  |
| AT5G20840 | gbM  | mCHH | gbM  | gbM | gbM | gbM | gbM  | UM  |
| AT5G20850 | UM   | UM   | UM   | UM  | UM  | UM  | UM   | UM  |
| AT5G20860 | UM   | UM   | UM   | UM  | UM  | UM  | UM   | UM  |
| AT5G20870 | UM   | UM   | UM   | UM  | UM  | UM  | UM   | UM  |
| AT5G20885 | UM   | UM   | UM   | UM  | UM  | UM  | UM   | UM  |



|           |      |      |      |     |     |     |      |     |
|-----------|------|------|------|-----|-----|-----|------|-----|
| AT5G22010 | gbM  | mCHH | gbM  | gbM | gbM | gbM | mCHH | gbM |
| AT5G22020 | UM   | UM   | UM   | UM  | UM  | UM  | UM   | UM  |
| AT5G22030 | gbM  | gbM  | gbM  | gbM | gbM | gbM | mCHH | gbM |
| AT5G22040 | gbM  | UM   | gbM  | gbM | gbM | gbM | mCHH | UM  |
| AT5G22050 | UM   | UM   | UM   | UM  | UM  | UM  | UM   | UM  |
| AT5G22060 | UM   | UM   | UM   | UM  | UM  | UM  | UM   | UM  |
| AT5G22070 | UM   | UM   | UM   | UM  | UM  | UM  | UM   | UM  |
| AT5G22080 | UM   | UM   | UM   | UM  | UM  | UM  | mCHH | UM  |
| AT5G22090 | UM   | UM   | UM   | UM  | UM  | UM  | UM   | UM  |
| AT5G22100 | UM   | UM   | UM   | UM  | UM  | UM  | UM   | UM  |
| AT5G22110 | UM   | gbM  | UM   | UM  | UM  | UM  | gbM  | UM  |
| AT5G22120 | UM   | UM   | UM   | UM  | UM  | UM  | UM   | UM  |
| AT5G22130 | gbM  | gbM  | gbM  | gbM | gbM | UM  | gbM  | UM  |
| AT5G22140 | UM   | UM   | UM   | UM  | UM  | UM  | UM   | UM  |
| AT5G22150 | UM   | UM   | UM   | UM  | UM  | UM  | UM   | UM  |
| AT5G22160 | UM   | UM   | UM   | UM  | UM  | UM  | UM   | UM  |
| AT5G22170 | UM   | UM   | UM   | UM  | UM  | UM  | UM   | UM  |
| AT5G22180 | UM   | UM   | UM   | UM  | UM  | UM  | UM   | UM  |
| AT5G22190 | UM   | UM   | UM   | UM  | UM  | UM  | UM   | UM  |
| AT5G22200 | UM   | UM   | UM   | UM  | UM  | UM  | UM   | UM  |
| AT5G22210 | UM   | UM   | UM   | UM  | UM  | UM  | UM   | UM  |
| AT5G22220 | UM   | gbM  | UM   | UM  | UM  | UM  | UM   | UM  |
| AT5G22240 | UM   | UM   | UM   | UM  | UM  | UM  | UM   | UM  |
| AT5G22250 | UM   | UM   | UM   | UM  | UM  | UM  | UM   | UM  |
| AT5G22260 | UM   | UM   | UM   | UM  | UM  | UM  | mCHH | UM  |
| AT5G22270 | UM   | UM   | UM   | UM  | UM  | UM  | UM   | UM  |
| AT5G22280 | UM   | UM   | UM   | UM  | UM  | UM  | UM   | UM  |
| AT5G22290 | UM   | UM   | UM   | UM  | UM  | UM  | UM   | UM  |
| AT5G22300 | UM   | UM   | UM   | UM  | UM  | UM  | UM   | UM  |
| AT5G22310 | UM   | UM   | UM   | UM  | UM  | UM  | UM   | UM  |
| AT5G22320 | gbM  | mCHH | mCHH | UM  | UM  | gbM | mCHH | gbM |
| AT5G22330 | gbM  | gbM  | gbM  | UM  | UM  | UM  | gbM  | UM  |
| AT5G22340 | UM   | UM   | UM   | UM  | UM  | UM  | UM   | UM  |
| AT5G22350 | gbM  | gbM  | gbM  | UM  | UM  | UM  | gbM  | UM  |
| AT5G22355 | UM   | UM   | UM   | UM  | UM  | UM  | UM   | UM  |
| AT5G22360 | UM   | UM   | UM   | UM  | UM  | UM  | UM   | UM  |
| AT5G22370 | UM   | gbM  | UM   | UM  | UM  | UM  | UM   | UM  |
| AT5G22380 | UM   | UM   | UM   | UM  | UM  | UM  | UM   | UM  |
| AT5G22390 | UM   | UM   | UM   | UM  | UM  | UM  | UM   | UM  |
| AT5G22400 | UM   | UM   | UM   | UM  | UM  | UM  | mCHH | UM  |
| AT5G22410 | UM   | UM   | UM   | UM  | UM  | UM  | UM   | UM  |
| AT5G22420 | mCHH | mCHH | mCHH | UM  | UM  | UM  | mCHH | UM  |
| AT5G22430 | UM   | UM   | UM   | UM  | UM  | UM  | UM   | UM  |
| AT5G22440 | UM   | UM   | UM   | UM  | UM  | UM  | mCHH | UM  |
| AT5G22450 | gbM  | gbM  | gbM  | gbM | gbM | gbM | mCHH | gbM |
| AT5G22460 | UM   | UM   | UM   | UM  | UM  | UM  | UM   | UM  |
| AT5G22470 | UM   | UM   | UM   | UM  | UM  | UM  | UM   | UM  |
| AT5G22480 | gbM  | gbM  | UM   | gbM | gbM | gbM | gbM  | gbM |



|           |      |      |      |     |     |     |      |     |
|-----------|------|------|------|-----|-----|-----|------|-----|
| AT5G22920 | UM   | UM   | UM   | UM  | UM  | UM  | UM   | UM  |
| AT5G22930 | UM   | UM   | UM   | UM  | UM  | UM  | UM   | UM  |
| AT5G22940 | UM   | UM   | UM   | UM  | UM  | UM  | UM   | UM  |
| AT5G22950 | UM   | UM   | UM   | UM  | UM  | UM  | UM   | UM  |
| AT5G22960 | UM   | UM   | UM   | UM  | UM  | UM  | UM   | UM  |
| AT5G22970 | UM   | UM   | UM   | UM  | UM  | UM  | UM   | UM  |
| AT5G22980 | UM   | UM   | UM   | UM  | UM  | UM  | UM   | UM  |
| AT5G22990 | mCHH | mCHH | UM   | UM  | UM  | UM  | mCHH | UM  |
| AT5G23000 | UM   | UM   | UM   | UM  | UM  | UM  | UM   | UM  |
| AT5G23010 | UM   | UM   | UM   | UM  | UM  | UM  | UM   | UM  |
| AT5G23020 | UM   | UM   | UM   | UM  | UM  | UM  | UM   | UM  |
| AT5G23027 | UM   | UM   | UM   | UM  | UM  | UM  | UM   | UM  |
| AT5G23030 | UM   | UM   | UM   | UM  | UM  | UM  | UM   | UM  |
| AT5G23035 | UM   | UM   | UM   | UM  | UM  | UM  | UM   | UM  |
| AT5G23040 | UM   | UM   | UM   | UM  | UM  | UM  | UM   | UM  |
| AT5G23050 | UM   | UM   | UM   | UM  | UM  | UM  | UM   | UM  |
| AT5G23060 | UM   | UM   | UM   | UM  | UM  | UM  | UM   | UM  |
| AT5G23070 | UM   | UM   | UM   | UM  | UM  | UM  | UM   | UM  |
| AT5G23080 | gbM  | mCHH | mCHH | gbM | gbM | gbM | mCHH | gbM |
| AT5G23090 | UM   | UM   | UM   | UM  | UM  | UM  | UM   | UM  |
| AT5G23100 | UM   | UM   | UM   | UM  | UM  | UM  | UM   | UM  |
| AT5G23110 | gbM  | mCHH | gbM  | gbM | gbM | gbM | mCHH | gbM |
| AT5G23120 | UM   | UM   | UM   | UM  | UM  | UM  | UM   | UM  |
| AT5G23130 | UM   | UM   | UM   | UM  | UM  | UM  | UM   | UM  |
| AT5G23140 | UM   | UM   | UM   | UM  | UM  | UM  | UM   | UM  |
| AT5G23150 | gbM  | gbM  | gbM  | gbM | gbM | gbM | mCHH | gbM |
| AT5G23160 | UM   | UM   | UM   | UM  | UM  | UM  | UM   | UM  |
| AT5G23170 | UM   | UM   | UM   | UM  | UM  | UM  | UM   | UM  |
| AT5G23180 | UM   | UM   | UM   | UM  | UM  | UM  | UM   | UM  |
| AT5G23190 | UM   | UM   | UM   | UM  | UM  | UM  | UM   | UM  |
| AT5G23200 | UM   | UM   | UM   | UM  | UM  | UM  | UM   | UM  |
| AT5G23210 | UM   | UM   | UM   | UM  | UM  | UM  | UM   | UM  |
| AT5G23212 | UM   | UM   | UM   | UM  | UM  | UM  | UM   | UM  |
| AT5G23220 | UM   | UM   | UM   | UM  | UM  | UM  | UM   | UM  |
| AT5G23230 | UM   | UM   | UM   | UM  | UM  | UM  | UM   | UM  |
| AT5G23240 | UM   | UM   | UM   | UM  | UM  | UM  | UM   | UM  |
| AT5G23250 | UM   | UM   | UM   | UM  | UM  | UM  | UM   | UM  |
| AT5G23260 | UM   | UM   | UM   | UM  | UM  | UM  | UM   | UM  |
| AT5G23270 | UM   | UM   | UM   | UM  | UM  | UM  | UM   | UM  |
| AT5G23280 | UM   | UM   | UM   | UM  | UM  | UM  | UM   | UM  |
| AT5G23290 | UM   | UM   | UM   | UM  | UM  | UM  | UM   | UM  |
| AT5G23300 | UM   | UM   | UM   | UM  | UM  | UM  | UM   | UM  |
| AT5G23310 | UM   | UM   | UM   | UM  | UM  | UM  | UM   | UM  |
| AT5G23320 | UM   | UM   | UM   | UM  | UM  | UM  | UM   | UM  |
| AT5G23330 | UM   | UM   | UM   | UM  | UM  | UM  | UM   | UM  |
| AT5G23340 | gbM  | gbM  | UM   | UM  | UM  | UM  | gbM  | UM  |
| AT5G23350 | UM   | UM   | UM   | UM  | UM  | UM  | UM   | UM  |
| AT5G23360 | UM   | UM   | UM   | UM  | UM  | UM  | UM   | UM  |



|           |      |      |      |      |      |      |      |      |
|-----------|------|------|------|------|------|------|------|------|
| AT5G23840 | UM   |
| AT5G23850 | UM   |
| AT5G23860 | UM   | UM   | UM   | UM   | UM   | UM   | mCHH | UM   |
| AT5G23870 | UM   |
| AT5G23880 | gbM  |
| AT5G23890 | gbM  | mCHG | gbM  | gbM  | gbM  | gbM  | mCHH | gbM  |
| AT5G23900 | UM   |
| AT5G23903 | UM   |
| AT5G23908 | UM   |
| AT5G23910 | UM   |
| AT5G23920 | UM   |
| AT5G23930 | UM   |
| AT5G23940 | UM   |
| AT5G23950 | UM   |
| AT5G23960 | UM   |
| AT5G23970 | UM   |
| AT5G23980 | UM   |
| AT5G23989 | UM   |
| AT5G23990 | UM   |
| AT5G24000 | UM   | UM   | UM   | UM   | UM   | UM   | mCHH | UM   |
| AT5G24010 | gbM  | gbM  | UM   | UM   | UM   | UM   | gbM  | gbM  |
| AT5G24020 | UM   |
| AT5G24030 | UM   | UM   | UM   | UM   | UM   | UM   | mCHH | UM   |
| AT5G24040 | UM   |
| AT5G24050 | UM   |
| AT5G24060 | UM   |
| AT5G24070 | UM   |
| AT5G24080 | UM   |
| AT5G24090 | UM   |
| AT5G24100 | UM   |
| AT5G24105 | UM   |
| AT5G24110 | UM   |
| AT5G24120 | UM   |
| AT5G24130 | UM   |
| AT5G24140 | UM   |
| AT5G24150 | UM   |
| AT5G24155 | UM   |
| AT5G24160 | UM   |
| AT5G24165 | UM   |
| AT5G24170 | UM   |
| AT5G24180 | UM   |
| AT5G24190 | mCHG | mCHG | UM   | UM   | UM   | mCHG | mCHG | mCHG |
| AT5G24200 | mCHH | mCHH | mCHH | mCHG | gbM  | gbM  | mCHH | mCHH |
| AT5G24210 | mCHG | mCHH | mCHG | UM   | mCHG | UM   | mCHG | UM   |
| AT5G24220 | mCHH | mCHH | mCHH | UM   | UM   | UM   | mCHH | mCHH |
| AT5G24230 | UM   |
| AT5G24240 | UM   |
| AT5G24250 | mCHH | mCHH | mCHH | mCHG | mCHH | mCHH | mCHH | mCHG |





|           |      |      |      |      |      |      |      |      |
|-----------|------|------|------|------|------|------|------|------|
| AT5G24660 | UM   |
| AT5G24670 | mCHG | mCHG | mCHG | gbM  | gbM  | gbM  | mCHG | mCHG |
| AT5G24680 | UM   |
| AT5G24690 | UM   |
| AT5G24710 | gbM  |
| AT5G24740 | gbM  | mCHH | gbM  | gbM  | gbM  | gbM  | mCHH | gbM  |
| AT5G24750 | gbM  | gbM  | gbM  | gbM  | gbM  | gbM  | mCHH | gbM  |
| AT5G24760 | UM   |
| AT5G24770 | UM   |
| AT5G24780 | UM   |
| AT5G24790 | UM   |
| AT5G24800 | gbM  | gbM  | gbM  | gbM  | gbM  | UM   | gbM  | gbM  |
| AT5G24810 | UM   | mCHH | UM   | UM   | UM   | UM   | UM   | UM   |
| AT5G24820 | UM   |
| AT5G24830 | UM   | gbM  | UM   | UM   | UM   | UM   | gbM  | UM   |
| AT5G24840 | gbM  | gbM  | gbM  | UM   | gbM  | UM   | gbM  | UM   |
| AT5G24850 | UM   |
| AT5G24860 | UM   |
| AT5G24870 | UM   |
| AT5G24879 | UM   |
| AT5G24880 | mCHH | mCHH | UM   | UM   | UM   | UM   | mCHH | UM   |
| AT5G24890 | UM   |
| AT5G24900 | mCHG | mCHH | mCHG | UM   | UM   | UM   | mCHH | mCHG |
| AT5G24910 | UM   |
| AT5G24920 | UM   |
| AT5G24930 | UM   |
| AT5G24940 | gbM  | gbM  | UM   | UM   | UM   | UM   | gbM  | UM   |
| AT5G24950 | UM   |
| AT5G24960 | UM   |
| AT5G24970 | gbM  | UM   |
| AT5G24980 | UM   |
| AT5G24990 | UM   |
| AT5G25000 | mCHH |
| AT5G25010 | UM   |
| AT5G25020 | UM   |
| AT5G25030 | UM   | UM   | UM   | UM   | UM   | UM   | mCHH | UM   |
| AT5G25040 | mCHH |
| AT5G25050 | mCHG | gbM  | gbM  | gbM  | gbM  | gbM  | mCHH | gbM  |
| AT5G25060 | gbM  | gbM  | gbM  | gbM  | gbM  | gbM  | mCHH | gbM  |
| AT5G25070 | UM   | mCHG | UM   | UM   | UM   | UM   | mCHG | UM   |
| AT5G25080 | UM   | gbM  | UM   | UM   | UM   | UM   | UM   | UM   |
| AT5G25090 | UM   |
| AT5G25100 | gbM  | mCHH | gbM  | gbM  | gbM  | gbM  | mCHG | gbM  |
| AT5G25102 | UM   |
| AT5G25110 | UM   |
| AT5G25120 | UM   |
| AT5G25130 | UM   |
| AT5G25140 | UM   |



|           |      |      |     |     |     |     |      |      |
|-----------|------|------|-----|-----|-----|-----|------|------|
| AT5G25580 | UM   | UM   | UM  | UM  | UM  | UM  | UM   | UM   |
| AT5G25590 | UM   | mCHH | UM  | UM  | UM  | UM  | mCHH | UM   |
| AT5G25600 | UM   | UM   | UM  | UM  | UM  | UM  | UM   | UM   |
| AT5G25610 | UM   | UM   | UM  | UM  | UM  | UM  | UM   | UM   |
| AT5G25620 | UM   | UM   | UM  | UM  | UM  | UM  | UM   | UM   |
| AT5G25630 | gbM  | UM   | gbM | UM  | UM  | UM  | gbM  | UM   |
| AT5G25640 | UM   | UM   | UM  | UM  | UM  | UM  | UM   | UM   |
| AT5G25750 | gbM  | gbM  | gbM | UM  | gbM | UM  | gbM  | UM   |
| AT5G25752 | UM   | UM   | UM  | UM  | UM  | UM  | UM   | UM   |
| AT5G25754 | UM   | UM   | UM  | UM  | UM  | UM  | UM   | UM   |
| AT5G25757 | UM   | UM   | UM  | UM  | UM  | UM  | UM   | UM   |
| AT5G25760 | UM   | UM   | UM  | UM  | UM  | UM  | UM   | UM   |
| AT5G25770 | UM   | UM   | UM  | UM  | UM  | UM  | mCHH | UM   |
| AT5G25780 | gbM  | gbM  | gbM | gbM | gbM | gbM | mCHH | gbM  |
| AT5G25790 | UM   | UM   | UM  | UM  | UM  | UM  | UM   | UM   |
| AT5G25800 | gbM  | gbM  | gbM | UM  | UM  | UM  | gbM  | UM   |
| AT5G25810 | UM   | UM   | UM  | UM  | UM  | UM  | UM   | UM   |
| AT5G25820 | UM   | UM   | UM  | UM  | UM  | UM  | UM   | UM   |
| AT5G25830 | UM   | UM   | UM  | UM  | UM  | UM  | UM   | UM   |
| AT5G25840 | UM   | UM   | UM  | UM  | UM  | UM  | UM   | UM   |
| AT5G25850 | UM   | UM   | UM  | UM  | UM  | UM  | UM   | UM   |
| AT5G25860 | UM   | UM   | UM  | UM  | UM  | UM  | UM   | UM   |
| AT5G25870 | mCHH | UM   | UM  | UM  | UM  | UM  | mCHH | UM   |
| AT5G25880 | UM   | UM   | UM  | UM  | UM  | UM  | UM   | UM   |
| AT5G25890 | UM   | UM   | UM  | UM  | UM  | UM  | UM   | UM   |
| AT5G25900 | UM   | UM   | UM  | UM  | UM  | UM  | gbM  | UM   |
| AT5G25910 | UM   | UM   | UM  | UM  | UM  | UM  | UM   | UM   |
| AT5G25920 | UM   | UM   | UM  | UM  | UM  | UM  | UM   | UM   |
| AT5G25930 | UM   | UM   | UM  | UM  | UM  | UM  | UM   | UM   |
| AT5G25940 | UM   | UM   | UM  | UM  | UM  | UM  | UM   | UM   |
| AT5G25950 | UM   | UM   | UM  | UM  | UM  | UM  | UM   | UM   |
| AT5G25960 | UM   | UM   | UM  | UM  | UM  | UM  | UM   | UM   |
| AT5G25970 | UM   | UM   | UM  | UM  | UM  | UM  | mCHH | mCHH |
| AT5G25980 | UM   | UM   | UM  | UM  | UM  | UM  | UM   | UM   |
| AT5G25990 | UM   | UM   | UM  | UM  | UM  | UM  | UM   | UM   |
| AT5G26000 | UM   | UM   | UM  | UM  | UM  | UM  | UM   | UM   |
| AT5G26010 | UM   | UM   | UM  | UM  | UM  | UM  | UM   | UM   |
| AT5G26030 | UM   | UM   | UM  | UM  | UM  | UM  | UM   | UM   |
| AT5G26040 | UM   | UM   | UM  | UM  | UM  | UM  | UM   | UM   |
| AT5G26050 | UM   | UM   | UM  | UM  | UM  | UM  | UM   | UM   |
| AT5G26060 | UM   | UM   | UM  | UM  | UM  | UM  | UM   | UM   |
| AT5G26070 | UM   | gbM  | UM  | UM  | UM  | UM  | UM   | UM   |
| AT5G26080 | UM   | UM   | UM  | UM  | UM  | UM  | UM   | UM   |
| AT5G26090 | UM   | UM   | UM  | UM  | UM  | UM  | UM   | UM   |
| AT5G26100 | UM   | UM   | UM  | UM  | UM  | UM  | UM   | UM   |
| AT5G26110 | UM   | UM   | UM  | UM  | UM  | UM  | UM   | UM   |
| AT5G26114 | gbM  | UM   | UM  | UM  | UM  | UM  | UM   | gbM  |
| AT5G26120 | gbM  | mCHH | UM  | UM  | UM  | UM  | mCHH | UM   |





|           |      |      |      |      |      |      |      |      |
|-----------|------|------|------|------|------|------|------|------|
| AT5G27220 | mCHH | mCHH | gbM  | gbM  | gbM  | gbM  | mCHH | gbM  |
| AT5G27230 | gbM  |
| AT5G27238 | mCHH | mCHH | mCHH | mCHG | mCHG | mCHH | mCHH | mCHH |
| AT5G27240 | mCHH | mCHH | gbM  | gbM  | gbM  | gbM  | mCHH | gbM  |
| AT5G27247 | UM   | UM   | UM   | UM   | UM   | UM   | mCHH | mCHH |
| AT5G27260 | mCHH |
| AT5G27270 | gbM  | gbM  | gbM  | gbM  | gbM  | gbM  | mCHH | gbM  |
| AT5G27280 | UM   |
| AT5G27290 | gbM  | UM   |
| AT5G27300 | UM   |
| AT5G27310 | UM   |
| AT5G27320 | UM   |
| AT5G27330 | UM   | UM   | UM   | UM   | UM   | UM   | mCHH | UM   |
| AT5G27340 | mCHH |
| AT5G27350 | UM   |
| AT5G27360 | UM   |
| AT5G27370 | UM   |
| AT5G27380 | UM   | UM   | gbM  | UM   | UM   | UM   | UM   | UM   |
| AT5G27390 | UM   |
| AT5G27395 | gbM  | gbM  | gbM  | UM   | UM   | UM   | gbM  | UM   |
| AT5G27400 | gbM  |
| AT5G27410 | gbM  |
| AT5G27420 | UM   |
| AT5G27430 | UM   |
| AT5G27440 | UM   |
| AT5G27450 | gbM  |
| AT5G27460 | UM   |
| AT5G27470 | gbM  |
| AT5G27490 | UM   |
| AT5G27495 | UM   |
| AT5G27510 | UM   |
| AT5G27520 | UM   |
| AT5G27530 | mCHH | mCHH | UM   | UM   | UM   | UM   | mCHH | UM   |
| AT5G27540 | gbM  |
| AT5G27550 | gbM  |
| AT5G27560 | gbM  | gbM  | gbM  | gbM  | UM   | UM   | gbM  | gbM  |
| AT5G27570 | UM   |
| AT5G27580 | UM   |
| AT5G27600 | UM   |
| AT5G27606 | mCHH |
| AT5G27610 | gbM  | mCHH | gbM  | gbM  | gbM  | gbM  | mCHH | gbM  |
| AT5G27620 | UM   |
| AT5G27630 | UM   |
| AT5G27640 | gbM  |
| AT5G27650 | gbM  | mCHH | gbM  | gbM  | gbM  | UM   | mCHH | gbM  |
| AT5G27660 | gbM  | gbM  | gbM  | gbM  | UM   | gbM  | gbM  | UM   |
| AT5G27670 | UM   |
| AT5G27680 | gbM  | gbM  | gbM  | UM   | gbM  | UM   | gbM  | gbM  |







|           |      |      |      |      |      |      |      |      |
|-----------|------|------|------|------|------|------|------|------|
| AT5G28740 | gbM  |
| AT5G28750 | UM   |
| AT5G28770 | UM   |
| AT5G28780 | mCHH |
| AT5G28781 | UM   | mCHH | mCHG | mCHG | mCHG | mCHG | mCHH | mCHG |
| AT5G28800 | mCHH | mCHH | mCHH | mCHG | mCHH | mCHH | mCHH | mCHG |
| AT5G28810 | mCHH |
| AT5G28820 | mCHH |
| AT5G28821 | mCHH | mCHH | mCHH | mCHG | gbM  | mCHG | mCHH | mCHG |
| AT5G28823 | mCHH |
| AT5G28830 | UM   |
| AT5G28840 | UM   |
| AT5G28850 | gbM  |
| AT5G28885 | mCHH | mCHH | mCHH | mCHG | mCHG | mCHH | mCHH | mCHH |
| AT5G28900 | gbM  |
| AT5G28910 | mCHH | mCHH | mCHH | mCHH | mCHH | mCHG | mCHH | mCHH |
| AT5G28919 | UM   |
| AT5G28920 | mCHH | mCHH | mCHH | mCHG | mCHH | mCHG | mCHH | mCHH |
| AT5G28931 | mCHH | mCHH | mCHH | mCHH | mCHH | mCHG | mCHH | mCHH |
| AT5G28950 | mCHH | mCHH | mCHH | mCHG | mCHG | mCHH | mCHH | mCHH |
| AT5G28960 | UM   |
| AT5G29000 | UM   |
| AT5G29044 | mCHH | mCHH | gbM  | gbM  | gbM  | mCHH | mCHH | gbM  |
| AT5G29050 | mCHH |
| AT5G29054 | mCHH | mCHH | mCHH | mCHH | mCHG | mCHG | mCHH | mCHH |
| AT5G29070 | mCHH |
| AT5G29210 | mCHH | mCHH | mCHH | mCHG | mCHH | mCHH | mCHH | mCHG |
| AT5G29231 | mCHG | mCHH | mCHH | mCHG | UM   | mCHG | mCHH | mCHG |
| AT5G29560 | UM   |
| AT5G29613 | mCHH | mCHH | mCHH | gbM  | gbM  | mCHG | mCHH | mCHG |
| AT5G29624 | mCHH |
| AT5G29807 | mCHH | mCHH | mCHH | mCHH | mCHH | mCHG | mCHH | mCHH |
| AT5G30341 | mCHH |
| AT5G30490 | gbM  | gbM  | UM   | UM   | UM   | UM   | mCHH | UM   |
| AT5G30495 | UM   |
| AT5G30500 | UM   |
| AT5G30510 | UM   |
| AT5G30520 | mCHH | mCHH | mCHH | mCHH | mCHG | mCHH | mCHH | mCHH |
| AT5G31412 | mCHH |
| AT5G32440 | UM   |
| AT5G32450 | UM   |
| AT5G32460 | UM   |
| AT5G32470 | gbM  | UM   |
| AT5G32590 | mCHH |
| AT5G32597 | mCHH | mCHH | mCHH | UM   | UM   | mCHG | mCHH | mCHG |
| AT5G32613 | mCHH |
| AT5G32619 | mCHH | mCHH | mCHH | UM   | mCHH | UM   | mCHH | UM   |
| AT5G33210 | mCHH | mCHH | mCHH | mCHG | gbM  | mCHH | mCHH | mCHH |







|           |      |         |         |         |         |         |         |         |
|-----------|------|---------|---------|---------|---------|---------|---------|---------|
| AT5G36260 | UM   | UM      | UM      | UM      | UM      | UM      | UM      | UM      |
| AT5G36280 | UM   | UM      | UM      | UM      | UM      | UM      | UM      | UM      |
| AT5G36290 | UM   | UM      | UM      | UM      | UM      | UM      | UM      | UM      |
| AT5G36300 | mCHH | mCHH    | mCHH    | mCHH    | mCHH    | mCHH    | mCHH    | mCHH    |
| AT5G36310 | mCHH | mCHH    | mCHH    | mCHG    | mCHG    | mCHG    | mCHH    | mCHH    |
| AT5G36320 | mCHH | mCHH    | mCHH    | mCHH    | mCHH    | mCHG    | mCHH    | mCHH    |
| AT5G36330 | mCHH | mCHH    | mCHH    | mCHH    | mCHH    | mCHG    | mCHH    | mCHG    |
| AT5G36340 | mCHH | mCHH    | mCHH    | mCHG    | mCHG    | mCHG    | mCHH    | mCHG    |
| AT5G36350 | mCHH | mCHH    | mCHH    | mCHG    | mCHG    | mCHG    | mCHH    | mCHG    |
| AT5G36360 | mCHH | mCHH    | mCHH    | mCHH    | mCHH    | mCHH    | mCHH    | mCHH    |
| AT5G36370 | mCHH | mCHH    | mCHH    | mCHG    | mCHG    | mCHH    | mCHH    | mCHH    |
| AT5G36380 | mCHH | mCHH    | mCHH    | mCHG    | gbM     | mCHH    | mCHH    | mCHG    |
| AT5G36390 | mCHH | mCHH    | mCHH    | mCHG    | mCHG    | mCHG    | mCHH    | mCHG    |
| AT5G36400 | mCHH | mCHH    | mCHH    | gbM     | mCHG    | mCHH    | mCHH    | mCHG    |
| AT5G36410 | mCHG | mCHH    | mCHG    | mCHG    | mCHG    | mCHG    | mCHH    | mCHG    |
| AT5G36420 | mCHH | mCHH    | mCHH    | mCHG    | mCHG    | UM      | mCHH    | mCHG    |
| AT5G36430 | mCHH | mCHH    | mCHH    | mCHG    | mCHG    | mCHG    | mCHH    | gbM     |
| AT5G36440 | mCHH | mCHH    | mCHH    | mCHG    | mCHG    | mCHG    | mCHH    | mCHG    |
| AT5G36450 | mCHH | mCHH    | mCHH    | mCHG    | mCHG    | mCHH    | mCHH    | mCHG    |
| AT5G36460 | mCHH | mCHH    | mCHH    | mCHG    | mCHH    | mCHH    | mCHH    | mCHG    |
| AT5G36470 | mCHH | mCHH    | mCHH    | mCHG    | mCHH    | mCHH    | mCHH    | mCHG    |
| AT5G36480 | mCHH | mCHH    | mCHH    | mCHG    | mCHH    | mCHG    | mCHH    | mCHG    |
| AT5G36490 | mCHH | mCHH    | mCHH    | mCHG    | mCHG    | mCHH    | mCHH    | mCHH    |
| AT5G36500 | mCHH | mCHH    | mCHH    | mCHG    | mCHH    | mCHG    | mCHH    | mCHG    |
| AT5G36520 | mCHH | mCHH    | mCHH    | mCHG    | gbM     | mCHG    | mCHH    | mCHG    |
| AT5G36540 | mCHH | mCHH    | mCHH    | mCHG    | mCHH    | mCHH    | mCHH    | mCHG    |
| AT5G36550 | mCHH | mCHH    | mCHH    | mCHG    | mCHG    | mCHH    | mCHH    | mCHH    |
| AT5G36657 | mCHH | mCHH    | mCHH    | mCHH    | mCHH    | mCHH    | mCHH    | mCHH    |
| AT5G36658 | mCHH | mCHH    | mCHH    | mCHH    | mCHH    | mCHG    | mCHH    | mCHH    |
| AT5G36659 | mCHH | mCHH    | mCHH    | mCHG    | mCHG    | mCHG    | mCHH    | mCHG    |
| AT5G36661 | mCHG | mCHG    | mCHH    | UM      | gbM     | unknown | mCHH    | UM      |
| AT5G36662 | gbM  | UM      | UM      | unknown | unknown | unknown | UM      | unknown |
| AT5G36670 | UM   | UM      | UM      | unknown | UM      | unknown | UM      | unknown |
| AT5G36680 | UM   | UM      | unknown | unknown | unknown | unknown | UM      | unknown |
| AT5G36690 | UM   | UM      | UM      | UM      | unknown | unknown | UM      | unknown |
| AT5G36700 | UM   | UM      | UM      | UM      | unknown | UM      | UM      | UM      |
| AT5G36710 | UM   | UM      | UM      | unknown | unknown | unknown | UM      | unknown |
| AT5G36720 | UM   | unknown | UM      | unknown | unknown | unknown | UM      | unknown |
| AT5G36730 | UM   | UM      | UM      | unknown | unknown | unknown | UM      | unknown |
| AT5G36738 | mCHG | mCHH    | mCHG    | UM      | UM      | UM      | mCHH    | unknown |
| AT5G36739 | UM   | UM      | UM      | unknown | unknown | UM      | gbM     | unknown |
| AT5G36740 | UM   | UM      | UM      | UM      | UM      | UM      | UM      | UM      |
| AT5G36780 | UM   | UM      | UM      | unknown | unknown | unknown | UM      | unknown |
| AT5G36790 | UM   | UM      | UM      | UM      | unknown | UM      | UM      | unknown |
| AT5G36800 | UM   | UM      | UM      | unknown | unknown | unknown | UM      | unknown |
| AT5G36805 | UM   | UM      | unknown | unknown | unknown | unknown | unknown | unknown |
| AT5G36810 | UM   | unknown | UM      | unknown | unknown | unknown | UM      | unknown |
| AT5G36820 | UM   | UM      | UM      | unknown | unknown | unknown | UM      | unknown |

|           |      |      |      |      |      |      |      |      |
|-----------|------|------|------|------|------|------|------|------|
| AT5G36870 | UM   | UM   | UM   | UM   | UM   | UM   | mCHH | UM   |
| AT5G36880 | gbM  | mCHH | mCHH | gbM  | gbM  | gbM  | mCHH | gbM  |
| AT5G36890 | UM   |
| AT5G36900 | mCHH |
| AT5G36910 | UM   |
| AT5G36920 | UM   | UM   | UM   | UM   | UM   | UM   | mCHH | UM   |
| AT5G36925 | UM   |
| AT5G36930 | gbM  | gbM  | gbM  | gbM  | gbM  | gbM  | mCHH | gbM  |
| AT5G36940 | gbM  | gbM  | gbM  | UM   | gbM  | gbM  | gbM  | gbM  |
| AT5G36950 | UM   |
| AT5G36960 | UM   |
| AT5G36970 | UM   |
| AT5G36980 | UM   |
| AT5G37000 | UM   | mCHH | UM   | gbM  | gbM  | gbM  | UM   | gbM  |
| AT5G37010 | gbM  | gbM  | gbM  | UM   | UM   | UM   | mCHH | UM   |
| AT5G37020 | gbM  |
| AT5G37030 | UM   | mCHH | UM   | UM   | UM   | UM   | UM   | UM   |
| AT5G37040 | UM   |
| AT5G37050 | UM   |
| AT5G37055 | UM   |
| AT5G37060 | UM   |
| AT5G37070 | UM   |
| AT5G37130 | gbM  | UM   | UM   | UM   | UM   | UM   | mCHH | UM   |
| AT5G37140 | UM   | UM   | UM   | UM   | UM   | UM   | mCHH | UM   |
| AT5G37150 | mCHH |
| AT5G37160 | mCHH | mCHH | mCHH | UM   | UM   | UM   | mCHH | mCHG |
| AT5G37170 | UM   | UM   | UM   | UM   | UM   | UM   | mCHH | UM   |
| AT5G37180 | UM   | UM   | UM   | UM   | UM   | UM   | mCHH | UM   |
| AT5G37190 | mCHH | mCHH | mCHH | UM   | UM   | gbM  | mCHH | UM   |
| AT5G37200 | UM   |
| AT5G37210 | UM   | UM   | UM   | UM   | UM   | UM   | mCHH | UM   |
| AT5G37220 | UM   | mCHH | UM   | UM   | UM   | UM   | UM   | UM   |
| AT5G37230 | UM   |
| AT5G37240 | UM   |
| AT5G37250 | UM   |
| AT5G37260 | mCHG | mCHG | UM   | UM   | UM   | UM   | mCHH | UM   |
| AT5G37270 | mCHH |
| AT5G37280 | UM   | UM   | UM   | UM   | UM   | UM   | mCHH | UM   |
| AT5G37290 | UM   |
| AT5G37300 | UM   |
| AT5G37310 | mCHH | mCHH | gbM  | gbM  | UM   | gbM  | gbM  | gbM  |
| AT5G37320 | UM   |
| AT5G37340 | gbM  |
| AT5G37350 | gbM  | mCHH | gbM  | UM   | UM   | UM   | gbM  | UM   |
| AT5G37351 | UM   |
| AT5G37360 | UM   |
| AT5G37370 | gbM  | gbM  | mCHH | gbM  | gbM  | gbM  | gbM  | gbM  |
| AT5G37380 | gbM  | gbM  | gbM  | gbM  | gbM  | gbM  | mCHH | gbM  |







|           |      |      |      |      |      |      |      |      |
|-----------|------|------|------|------|------|------|------|------|
| AT5G38314 | UM   |
| AT5G38317 | UM   |
| AT5G38320 | UM   |
| AT5G38330 | UM   |
| AT5G38340 | UM   | UM   | UM   | UM   | UM   | UM   | mCHH | UM   |
| AT5G38344 | UM   |
| AT5G38350 | UM   |
| AT5G38360 | UM   |
| AT5G38370 | UM   |
| AT5G38378 | mCHH |
| AT5G38380 | UM   | gbM  | UM   | UM   | UM   | UM   | UM   | UM   |
| AT5G38386 | UM   |
| AT5G38390 | UM   |
| AT5G38396 | UM   |
| AT5G38400 | UM   |
| AT5G38410 | UM   |
| AT5G38420 | UM   |
| AT5G38430 | UM   |
| AT5G38435 | UM   |
| AT5G38440 | UM   |
| AT5G38450 | UM   | mCHH | UM   | UM   | UM   | UM   | UM   | UM   |
| AT5G38460 | UM   | UM   | UM   | UM   | UM   | UM   | mCHH | UM   |
| AT5G38470 | gbM  |
| AT5G38480 | UM   |
| AT5G38490 | UM   |
| AT5G38500 | UM   |
| AT5G38510 | gbM  | UM   |
| AT5G38520 | UM   |
| AT5G38530 | UM   |
| AT5G38540 | UM   |
| AT5G38550 | UM   | UM   | UM   | UM   | UM   | UM   | mCHH | UM   |
| AT5G38560 | gbM  |
| AT5G38565 | UM   |
| AT5G38570 | UM   |
| AT5G38580 | UM   |
| AT5G38590 | UM   |
| AT5G38600 | gbM  | gbM  | gbM  | gbM  | gbM  | gbM  | mCHH | gbM  |
| AT5G38610 | UM   |
| AT5G38620 | UM   |
| AT5G38630 | UM   |
| AT5G38640 | UM   |
| AT5G38650 | UM   |
| AT5G38660 | UM   |
| AT5G38670 | UM   |
| AT5G38680 | UM   |
| AT5G38690 | UM   | UM   | UM   | UM   | UM   | UM   | mCHH | UM   |
| AT5G38700 | UM   |
| AT5G38710 | UM   |

|           |      |      |      |      |      |      |      |      |
|-----------|------|------|------|------|------|------|------|------|
| AT5G38720 | UM   |
| AT5G38730 | UM   | UM   | mCHG | UM   | UM   | UM   | UM   | UM   |
| AT5G38740 | UM   |
| AT5G38750 | UM   |
| AT5G38760 | UM   |
| AT5G38770 | UM   |
| AT5G38780 | UM   |
| AT5G38790 | UM   |
| AT5G38800 | UM   |
| AT5G38810 | UM   |
| AT5G38820 | UM   | UM   | UM   | UM   | UM   | UM   | mCHH | UM   |
| AT5G38830 | UM   |
| AT5G38840 | gbM  | mCHH | mCHH | UM   | UM   | UM   | mCHH | UM   |
| AT5G38850 | UM   | UM   | UM   | UM   | UM   | UM   | mCHH | UM   |
| AT5G38860 | UM   |
| AT5G38880 | gbM  | mCHH | gbM  | gbM  | gbM  | gbM  | gbM  | gbM  |
| AT5G38890 | UM   |
| AT5G38895 | UM   |
| AT5G38900 | UM   |
| AT5G38910 | mCHH | mCHH | mCHH | mCHG | mCHG | mCHG | mCHH | mCHH |
| AT5G38920 | mCHH |
| AT5G38930 | mCHH |
| AT5G38940 | mCHH |
| AT5G38950 | UM   | UM   | UM   | UM   | UM   | UM   | mCHH | UM   |
| AT5G38960 | mCHH | mCHH | mCHH | mCHG | mCHG | mCHG | mCHH | mCHH |
| AT5G38970 | UM   |
| AT5G38980 | UM   |
| AT5G38990 | UM   |
| AT5G39000 | UM   |
| AT5G39010 | UM   |
| AT5G39020 | mCHG | mCHH | mCHH | UM   | UM   | UM   | mCHH | UM   |
| AT5G39024 | UM   |
| AT5G39030 | UM   |
| AT5G39040 | gbM  |
| AT5G39050 | UM   |
| AT5G39080 | UM   |
| AT5G39090 | UM   |
| AT5G39100 | mCHH | mCHH | mCHH | mCHG | mCHH | mCHG | mCHH | mCHH |
| AT5G39110 | mCHH |
| AT5G39120 | mCHH |
| AT5G39130 | mCHH | mCHH | mCHH | mCHG | mCHG | mCHH | mCHH | mCHH |
| AT5G39140 | mCHH | mCHG | mCHG | gbM  | gbM  | gbM  | mCHG | mCHG |
| AT5G39150 | mCHH |
| AT5G39160 | mCHH | mCHH | mCHH | mCHG | mCHG | mCHH | mCHH | mCHH |
| AT5G39170 | mCHH | mCHH | mCHH | gbM  | gbM  | mCHH | mCHH | mCHH |
| AT5G39180 | mCHH | mCHH | mCHH | mCHG | mCHH | mCHH | mCHH | mCHH |
| AT5G39190 | mCHH | mCHH | mCHH | mCHG | mCHG | mCHH | mCHH | mCHH |
| AT5G39200 | mCHH | mCHH | mCHH | mCHG | mCHG | mCHG | mCHH | mCHG |

|           |      |      |      |      |      |      |      |      |
|-----------|------|------|------|------|------|------|------|------|
| AT5G39210 | UM   |
| AT5G39220 | UM   |
| AT5G39230 | UM   |
| AT5G39240 | UM   |
| AT5G39250 | UM   |
| AT5G39260 | UM   |
| AT5G39270 | UM   |
| AT5G39280 | UM   |
| AT5G39290 | UM   |
| AT5G39300 | UM   |
| AT5G39310 | UM   |
| AT5G39320 | UM   | UM   | UM   | UM   | UM   | UM   | mCHH | UM   |
| AT5G39330 | UM   |
| AT5G39340 | UM   |
| AT5G39350 | gbM  | gbM  | gbM  | gbM  | UM   | UM   | gbM  | gbM  |
| AT5G39360 | UM   | UM   | UM   | gbM  | UM   | UM   | UM   | UM   |
| AT5G39365 | UM   |
| AT5G39370 | UM   |
| AT5G39380 | gbM  | mCHH | gbM  | gbM  | UM   | gbM  | mCHH | UM   |
| AT5G39390 | UM   |
| AT5G39400 | UM   |
| AT5G39410 | UM   |
| AT5G39420 | UM   |
| AT5G39430 | UM   |
| AT5G39440 | UM   |
| AT5G39450 | gbM  | UM   | UM   | UM   | UM   | UM   | gbM  | UM   |
| AT5G39460 | UM   |
| AT5G39470 | UM   |
| AT5G39471 | UM   |
| AT5G39480 | mCHH | mCHH | mCHH | mCHG | mCHG | mCHH | mCHH | mCHH |
| AT5G39490 | mCHH | mCHH | mCHH | mCHG | mCHG | mCHG | mCHH | mCHH |
| AT5G39493 | UM   | UM   | mCHH | UM   | UM   | UM   | mCHH | mCHH |
| AT5G39500 | gbM  | mCHH | gbM  | gbM  | gbM  | gbM  | mCHH | gbM  |
| AT5G39510 | gbM  | gbM  | gbM  | UM   | gbM  | UM   | gbM  | UM   |
| AT5G39520 | UM   |
| AT5G39530 | UM   |
| AT5G39540 | UM   |
| AT5G39550 | UM   |
| AT5G39560 | UM   |
| AT5G39570 | UM   | UM   | UM   | UM   | UM   | UM   | mCHH | UM   |
| AT5G39580 | UM   |
| AT5G39581 | UM   |
| AT5G39590 | UM   |
| AT5G39600 | UM   |
| AT5G39610 | mCHH | UM   |
| AT5G39620 | mCHH | mCHH | mCHH | UM   | UM   | mCHG | mCHH | mCHH |
| AT5G39630 | UM   |
| AT5G39640 | mCHH | mCHH | mCHH | mCHG | mCHG | mCHH | mCHH | mCHG |

|           |      |      |      |      |      |      |      |      |
|-----------|------|------|------|------|------|------|------|------|
| AT5G39645 | mCHH | mCHH | mCHG | mCHG | mCHG | mCHH | mCHH | mCHH |
| AT5G39650 | UM   |
| AT5G39660 | UM   |
| AT5G39670 | UM   |
| AT5G39680 | UM   | gbM  | UM   | gbM  | UM   | UM   | mCHH | UM   |
| AT5G39690 | UM   | mCHH | UM   | UM   | UM   | UM   | mCHH | UM   |
| AT5G39700 | UM   |
| AT5G39710 | gbM  | gbM  | mCHG | gbM  | gbM  | UM   | gbM  | gbM  |
| AT5G39720 | UM   |
| AT5G39730 | UM   |
| AT5G39740 | UM   |
| AT5G39750 | UM   |
| AT5G39760 | UM   |
| AT5G39770 | mCHH |
| AT5G39785 | UM   | UM   | UM   | UM   | UM   | UM   | mCHH | UM   |
| AT5G39790 | gbM  | gbM  | gbM  | UM   | UM   | UM   | mCHH | UM   |
| AT5G39800 | UM   |
| AT5G39810 | UM   |
| AT5G39820 | UM   |
| AT5G39830 | gbM  |
| AT5G39840 | gbM  |
| AT5G39850 | UM   |
| AT5G39860 | UM   |
| AT5G39865 | UM   |
| AT5G39870 | UM   | UM   | UM   | UM   | UM   | UM   | mCHH | UM   |
| AT5G39880 | UM   |
| AT5G39890 | UM   |
| AT5G39900 | gbM  |
| AT5G39910 | UM   |
| AT5G39920 | mCHH | mCHH | mCHH | mCHG | gbM  | mCHG | mCHH | mCHH |
| AT5G39930 | UM   |
| AT5G39940 | gbM  |
| AT5G39950 | UM   |
| AT5G39960 | gbM  | gbM  | gbM  | gbM  | gbM  | gbM  | mCHH | gbM  |
| AT5G39970 | gbM  | gbM  | gbM  | UM   | UM   | UM   | gbM  | gbM  |
| AT5G39980 | gbM  | gbM  | gbM  | gbM  | gbM  | gbM  | mCHH | gbM  |
| AT5G39990 | UM   |
| AT5G40000 | UM   |
| AT5G40010 | mCHH | mCHG | UM   | UM   | UM   | UM   | mCHH | UM   |
| AT5G40020 | UM   |
| AT5G40030 | UM   | UM   | UM   | UM   | gbM  | UM   | UM   | gbM  |
| AT5G40040 | UM   |
| AT5G40050 | UM   |
| AT5G40060 | UM   |
| AT5G40070 | UM   |
| AT5G40080 | UM   |
| AT5G40090 | UM   | UM   | UM   | UM   | UM   | UM   | mCHH | UM   |
| AT5G40100 | gbM  | mCHH | UM   | UM   | UM   | UM   | gbM  | UM   |

|           |      |      |      |     |     |     |      |     |
|-----------|------|------|------|-----|-----|-----|------|-----|
| AT5G40120 | UM   | UM   | UM   | UM  | UM  | UM  | mCHH | UM  |
| AT5G40140 | UM   | UM   | UM   | UM  | UM  | UM  | mCHH | UM  |
| AT5G40150 | UM   | UM   | UM   | UM  | UM  | UM  | UM   | UM  |
| AT5G40155 | UM   | UM   | UM   | UM  | UM  | UM  | UM   | UM  |
| AT5G40160 | UM   | UM   | UM   | UM  | UM  | UM  | UM   | UM  |
| AT5G40170 | UM   | UM   | UM   | UM  | UM  | UM  | UM   | UM  |
| AT5G40180 | UM   | UM   | UM   | UM  | UM  | UM  | UM   | UM  |
| AT5G40190 | UM   | UM   | UM   | UM  | UM  | UM  | UM   | UM  |
| AT5G40200 | UM   | UM   | UM   | UM  | UM  | UM  | UM   | UM  |
| AT5G40210 | UM   | UM   | UM   | UM  | UM  | UM  | UM   | UM  |
| AT5G40220 | UM   | UM   | UM   | UM  | UM  | UM  | UM   | UM  |
| AT5G40230 | gbM  | gbM  | UM   | UM  | UM  | UM  | gbM  | gbM |
| AT5G40240 | UM   | UM   | UM   | UM  | UM  | UM  | UM   | UM  |
| AT5G40250 | UM   | UM   | UM   | UM  | UM  | UM  | UM   | UM  |
| AT5G40260 | UM   | UM   | UM   | UM  | UM  | UM  | UM   | UM  |
| AT5G40270 | gbM  | gbM  | UM   | gbM | UM  | UM  | gbM  | UM  |
| AT5G40280 | UM   | UM   | UM   | UM  | UM  | UM  | UM   | UM  |
| AT5G40290 | UM   | UM   | UM   | UM  | UM  | UM  | UM   | UM  |
| AT5G40300 | UM   | UM   | UM   | UM  | UM  | UM  | UM   | UM  |
| AT5G40310 | UM   | UM   | UM   | UM  | UM  | UM  | UM   | UM  |
| AT5G40320 | UM   | UM   | UM   | UM  | UM  | UM  | UM   | UM  |
| AT5G40330 | UM   | UM   | UM   | UM  | UM  | UM  | UM   | UM  |
| AT5G40340 | mCHH | mCHH | mCHH | UM  | UM  | UM  | mCHH | UM  |
| AT5G40350 | UM   | UM   | UM   | UM  | UM  | UM  | UM   | UM  |
| AT5G40360 | UM   | UM   | UM   | UM  | UM  | UM  | UM   | UM  |
| AT5G40370 | UM   | UM   | UM   | UM  | UM  | UM  | UM   | UM  |
| AT5G40380 | UM   | UM   | UM   | UM  | UM  | UM  | UM   | UM  |
| AT5G40382 | UM   | UM   | UM   | UM  | UM  | UM  | UM   | UM  |
| AT5G40390 | UM   | UM   | UM   | UM  | UM  | UM  | UM   | UM  |
| AT5G40400 | gbM  | gbM  | gbM  | UM  | UM  | gbM | gbM  | UM  |
| AT5G40405 | UM   | UM   | UM   | UM  | UM  | UM  | UM   | UM  |
| AT5G40410 | UM   | UM   | UM   | UM  | UM  | UM  | UM   | UM  |
| AT5G40420 | UM   | UM   | UM   | UM  | UM  | UM  | UM   | UM  |
| AT5G40430 | UM   | UM   | UM   | UM  | UM  | UM  | mCHH | UM  |
| AT5G40440 | gbM  | gbM  | gbM  | gbM | gbM | UM  | gbM  | gbM |
| AT5G40450 | mCHH | mCHH | mCHH | UM  | UM  | UM  | mCHH | UM  |
| AT5G40460 | UM   | UM   | UM   | UM  | UM  | UM  | UM   | UM  |
| AT5G40470 | UM   | UM   | UM   | UM  | UM  | UM  | mCHH | UM  |
| AT5G40480 | gbM  | mCHH | gbM  | gbM | gbM | gbM | mCHH | gbM |
| AT5G40490 | gbM  | gbM  | gbM  | UM  | UM  | UM  | gbM  | UM  |
| AT5G40500 | UM   | UM   | UM   | UM  | UM  | UM  | UM   | UM  |
| AT5G40510 | UM   | UM   | UM   | UM  | UM  | UM  | UM   | UM  |
| AT5G40520 | gbM  | gbM  | gbM  | gbM | gbM | gbM | gbM  | gbM |
| AT5G40530 | UM   | UM   | UM   | UM  | UM  | UM  | mCHH | UM  |
| AT5G40540 | UM   | UM   | UM   | UM  | UM  | UM  | UM   | UM  |
| AT5G40550 | UM   | UM   | UM   | UM  | UM  | UM  | UM   | UM  |
| AT5G40560 | UM   | UM   | UM   | UM  | UM  | UM  | UM   | UM  |
| AT5G40570 | UM   | UM   | UM   | UM  | UM  | UM  | UM   | UM  |



|           |      |      |      |         |     |     |      |     |
|-----------|------|------|------|---------|-----|-----|------|-----|
| AT5G41020 | mCHH | mCHH | mCHH | UM      | UM  | UM  | mCHH | UM  |
| AT5G41030 | UM   | mCHH | UM   | UM      | UM  | UM  | mCHH | UM  |
| AT5G41040 | UM   | UM   | UM   | UM      | UM  | UM  | UM   | UM  |
| AT5G41050 | UM   | UM   | UM   | UM      | UM  | UM  | UM   | UM  |
| AT5G41060 | UM   | UM   | UM   | UM      | UM  | UM  | mCHH | UM  |
| AT5G41070 | UM   | UM   | UM   | UM      | UM  | UM  | UM   | UM  |
| AT5G41071 | UM   | UM   | UM   | UM      | UM  | UM  | UM   | UM  |
| AT5G41080 | UM   | UM   | UM   | UM      | UM  | UM  | UM   | UM  |
| AT5G41090 | UM   | UM   | UM   | UM      | UM  | UM  | UM   | UM  |
| AT5G41100 | gbM  | gbM  | gbM  | gbM     | gbM | gbM | gbM  | gbM |
| AT5G41109 | UM   | UM   | UM   | UM      | UM  | UM  | UM   | UM  |
| AT5G41110 | UM   | UM   | UM   | UM      | UM  | UM  | UM   | UM  |
| AT5G41120 | UM   | UM   | UM   | UM      | UM  | UM  | UM   | UM  |
| AT5G41130 | UM   | UM   | UM   | UM      | UM  | UM  | UM   | UM  |
| AT5G41140 | mCHH | mCHH | gbM  | gbM     | gbM | gbM | mCHH | gbM |
| AT5G41150 | gbM  | mCHG | gbM  | gbM     | gbM | gbM | mCHG | gbM |
| AT5G41160 | mCHH | mCHH | gbM  | gbM     | UM  | gbM | mCHH | UM  |
| AT5G41170 | UM   | mCHH | UM   | UM      | UM  | UM  | gbM  | UM  |
| AT5G41180 | gbM  | gbM  | gbM  | gbM     | gbM | gbM | mCHH | gbM |
| AT5G41190 | UM   | UM   | UM   | UM      | UM  | UM  | UM   | UM  |
| AT5G41200 | UM   | UM   | UM   | UM      | UM  | UM  | UM   | UM  |
| AT5G41210 | UM   | UM   | UM   | UM      | UM  | UM  | UM   | UM  |
| AT5G41220 | gbM  | mCHH | gbM  | gbM     | UM  | UM  | mCHH | UM  |
| AT5G41240 | gbM  | mCHH | gbM  | gbM     | gbM | UM  | mCHH | gbM |
| AT5G41250 | UM   | UM   | UM   | UM      | UM  | UM  | UM   | UM  |
| AT5G41260 | gbM  | gbM  | gbM  | gbM     | gbM | gbM | gbM  | gbM |
| AT5G41270 | UM   | UM   | UM   | UM      | UM  | UM  | UM   | UM  |
| AT5G41280 | UM   | UM   | UM   | UM      | UM  | UM  | UM   | UM  |
| AT5G41290 | UM   | UM   | UM   | UM      | UM  | UM  | UM   | UM  |
| AT5G41300 | UM   | UM   | UM   | UM      | UM  | UM  | UM   | UM  |
| AT5G41310 | UM   | UM   | UM   | UM      | UM  | UM  | mCHH | UM  |
| AT5G41315 | UM   | UM   | UM   | UM      | UM  | UM  | UM   | UM  |
| AT5G41320 | UM   | mCHH | UM   | UM      | UM  | UM  | mCHH | UM  |
| AT5G41330 | UM   | UM   | UM   | UM      | UM  | UM  | UM   | UM  |
| AT5G41340 | UM   | UM   | UM   | UM      | UM  | UM  | UM   | UM  |
| AT5G41350 | UM   | UM   | UM   | gbM     | gbM | gbM | UM   | gbM |
| AT5G41360 | gbM  | gbM  | gbM  | gbM     | gbM | gbM | mCHH | gbM |
| AT5G41370 | gbM  | gbM  | gbM  | gbM     | gbM | gbM | mCHH | gbM |
| AT5G41380 | UM   | UM   | UM   | UM      | UM  | UM  | UM   | UM  |
| AT5G41390 | UM   | UM   | UM   | UM      | UM  | UM  | mCHH | UM  |
| AT5G41400 | UM   | UM   | UM   | UM      | UM  | UM  | UM   | UM  |
| AT5G41401 | UM   | UM   | UM   | unknown | UM  | UM  | UM   | UM  |
| AT5G41410 | UM   | UM   | UM   | UM      | UM  | UM  | mCHH | UM  |
| AT5G41420 | UM   | UM   | UM   | UM      | UM  | UM  | UM   | UM  |
| AT5G41430 | UM   | UM   | UM   | UM      | gbM | UM  | UM   | gbM |
| AT5G41440 | UM   | UM   | UM   | UM      | UM  | UM  | UM   | UM  |
| AT5G41450 | UM   | UM   | UM   | UM      | UM  | UM  | UM   | UM  |
| AT5G41460 | UM   | UM   | UM   | UM      | UM  | UM  | UM   | UM  |



|           |      |      |      |      |      |      |      |      |
|-----------|------|------|------|------|------|------|------|------|
| AT5G41470 | UM   |
| AT5G41480 | gbM  | gbM  | gbM  | gbM  | gbM  | gbM  | mCHH | UM   |
| AT5G41490 | mCHH |
| AT5G41500 | mCHH |
| AT5G41510 | mCHH | mCHH | mCHH | UM   | mCHH | mCHG | mCHH | mCHH |
| AT5G41520 | UM   |
| AT5G41530 | UM   | UM   | UM   | UM   | UM   | UM   | mCHH | UM   |
| AT5G41540 | UM   |
| AT5G41550 | UM   |
| AT5G41560 | UM   |
| AT5G41570 | UM   |
| AT5G41580 | gbM  | UM   |
| AT5G41590 | UM   |
| AT5G41600 | UM   |
| AT5G41610 | UM   | UM   | UM   | UM   | UM   | UM   | mCHH | UM   |
| AT5G41614 | UM   |
| AT5G41620 | UM   |
| AT5G41630 | UM   |
| AT5G41640 | mCHH | UM   | UM   | UM   | UM   | UM   | mCHH | UM   |
| AT5G41650 | UM   |
| AT5G41660 | mCHH |
| AT5G41670 | UM   |
| AT5G41680 | gbM  |
| AT5G41685 | UM   |
| AT5G41690 | UM   |
| AT5G41700 | UM   |
| AT5G41720 | UM   | UM   | UM   | UM   | UM   | UM   | mCHH | UM   |
| AT5G41730 | UM   | UM   | UM   | UM   | UM   | UM   | mCHH | UM   |
| AT5G41740 | UM   |
| AT5G41750 | UM   | UM   | UM   | UM   | UM   | UM   | mCHH | UM   |
| AT5G41760 | gbM  | gbM  | gbM  | UM   | gbM  | gbM  | gbM  | gbM  |
| AT5G41761 | UM   |
| AT5G41765 | mCHH |
| AT5G41770 | UM   |
| AT5G41774 | UM   |
| AT5G41780 | UM   | UM   | UM   | UM   | UM   | UM   | mCHH | UM   |
| AT5G41790 | mCHH | mCHH | mCHH | gbM  | UM   | gbM  | mCHH | gbM  |
| AT5G41800 | UM   |
| AT5G41810 | UM   |
| AT5G41820 | UM   |
| AT5G41830 | UM   |
| AT5G41840 | UM   |
| AT5G41850 | UM   |
| AT5G41860 | UM   |
| AT5G41870 | UM   |
| AT5G41880 | UM   | UM   | UM   | UM   | UM   | UM   | mCHH | UM   |
| AT5G41890 | UM   |
| AT5G41900 | UM   |

|           |      |      |      |      |      |      |      |      |
|-----------|------|------|------|------|------|------|------|------|
| AT5G41908 | UM   |
| AT5G41910 | UM   |
| AT5G41920 | UM   |
| AT5G41940 | gbM  |
| AT5G41950 | UM   |
| AT5G41960 | UM   |
| AT5G41970 | UM   |
| AT5G41980 | UM   |
| AT5G41990 | gbM  |
| AT5G41992 | UM   |
| AT5G42000 | UM   |
| AT5G42010 | UM   |
| AT5G42020 | UM   |
| AT5G42030 | UM   |
| AT5G42040 | UM   |
| AT5G42050 | UM   |
| AT5G42053 | UM   |
| AT5G42060 | UM   |
| AT5G42070 | UM   |
| AT5G42080 | gbM  |
| AT5G42090 | UM   |
| AT5G42100 | UM   |
| AT5G42110 | UM   |
| AT5G42120 | UM   |
| AT5G42130 | UM   |
| AT5G42140 | gbM  | mCHH | gbM  | gbM  | gbM  | gbM  | gbM  | gbM  |
| AT5G42146 | UM   |
| AT5G42150 | UM   |
| AT5G42170 | mCHH | mCHG | mCHH | mCHG | mCHG | mCHG | mCHH | mCHG |
| AT5G42180 | UM   |
| AT5G42190 | UM   |
| AT5G42200 | UM   |
| AT5G42203 | UM   | UM   | mCHH | UM   | UM   | UM   | UM   | UM   |
| AT5G42210 | UM   |
| AT5G42220 | gbM  |
| AT5G42223 | UM   |
| AT5G42230 | UM   |
| AT5G42232 | UM   |
| AT5G42235 | UM   |
| AT5G42240 | UM   |
| AT5G42242 | UM   |
| AT5G42250 | UM   |
| AT5G42260 | mCHH |
| AT5G42270 | gbM  | gbM  | gbM  | gbM  | gbM  | UM   | gbM  | gbM  |
| AT5G42280 | UM   | mCHH | UM   | UM   | UM   | UM   | UM   | UM   |
| AT5G42290 | UM   |
| AT5G42300 | UM   |
| AT5G42310 | gbM  | gbM  | gbM  | UM   | UM   | UM   | mCHH | UM   |

|           |      |      |      |      |         |      |      |      |
|-----------|------|------|------|------|---------|------|------|------|
| AT5G42320 | UM   | UM   | UM   | UM   | UM      | UM   | mCHH | UM   |
| AT5G42325 | UM   | UM   | UM   | UM   | UM      | UM   | UM   | UM   |
| AT5G42330 | UM   | UM   | UM   | UM   | UM      | UM   | UM   | UM   |
| AT5G42340 | gbM  | gbM  | gbM  | UM   | gbM     | gbM  | mCHH | UM   |
| AT5G42350 | gbM  | gbM  | gbM  | gbM  | gbM     | UM   | gbM  | gbM  |
| AT5G42360 | gbM  | gbM  | gbM  | gbM  | gbM     | gbM  | gbM  | gbM  |
| AT5G42370 | UM   | UM   | UM   | UM   | UM      | UM   | UM   | UM   |
| AT5G42380 | UM   | UM   | UM   | UM   | UM      | UM   | UM   | UM   |
| AT5G42390 | gbM  | gbM  | gbM  | gbM  | gbM     | gbM  | mCHH | gbM  |
| AT5G42400 | gbM  | mCHH | gbM  | gbM  | gbM     | gbM  | mCHH | gbM  |
| AT5G42405 | mCHH | mCHH | mCHH | mCHG | UM      | mCHG | mCHH | mCHG |
| AT5G42410 | UM   | UM   | UM   | UM   | UM      | UM   | UM   | UM   |
| AT5G42420 | UM   | UM   | UM   | UM   | UM      | UM   | UM   | UM   |
| AT5G42430 | UM   | UM   | UM   | UM   | UM      | UM   | UM   | UM   |
| AT5G42440 | UM   | UM   | UM   | UM   | UM      | UM   | UM   | UM   |
| AT5G42450 | UM   | UM   | UM   | UM   | UM      | UM   | UM   | UM   |
| AT5G42460 | UM   | UM   | UM   | UM   | UM      | UM   | UM   | UM   |
| AT5G42470 | UM   | UM   | UM   | UM   | UM      | UM   | UM   | UM   |
| AT5G42480 | gbM  | gbM  | gbM  | UM   | UM      | gbM  | gbM  | UM   |
| AT5G42490 | UM   | UM   | UM   | UM   | UM      | UM   | mCHH | UM   |
| AT5G42500 | UM   | UM   | UM   | UM   | UM      | UM   | UM   | UM   |
| AT5G42504 | mCHH | mCHH | mCHH | mCHG | mCHG    | mCHG | mCHH | mCHG |
| AT5G42510 | UM   | UM   | UM   | UM   | UM      | UM   | UM   | UM   |
| AT5G42520 | gbM  | gbM  | gbM  | gbM  | UM      | gbM  | gbM  | gbM  |
| AT5G42530 | UM   | UM   | UM   | UM   | UM      | UM   | UM   | UM   |
| AT5G42540 | gbM  | mCHH | gbM  | gbM  | gbM     | gbM  | mCHH | gbM  |
| AT5G42560 | gbM  | UM   | UM   | UM   | UM      | UM   | UM   | UM   |
| AT5G42567 | mCHH | mCHH | mCHH | mCHH | mCHH    | mCHH | mCHH | mCHH |
| AT5G42570 | UM   | UM   | UM   | UM   | UM      | UM   | UM   | UM   |
| AT5G42580 | UM   | UM   | UM   | UM   | UM      | UM   | UM   | UM   |
| AT5G42590 | UM   | UM   | UM   | UM   | UM      | UM   | UM   | UM   |
| AT5G42591 | UM   | UM   | UM   | UM   | UM      | UM   | UM   | UM   |
| AT5G42600 | UM   | UM   | UM   | UM   | UM      | UM   | UM   | UM   |
| AT5G42610 | UM   | UM   | UM   | UM   | UM      | UM   | UM   | UM   |
| AT5G42620 | gbM  | gbM  | gbM  | gbM  | gbM     | gbM  | gbM  | gbM  |
| AT5G42630 | UM   | UM   | UM   | UM   | UM      | UM   | UM   | UM   |
| AT5G42635 | mCHH | mCHH | mCHH | UM   | unknown | mCHG | mCHH | mCHG |
| AT5G42640 | mCHH | mCHH | mCHH | mCHH | mCHH    | mCHH | mCHH | mCHH |
| AT5G42650 | UM   | UM   | UM   | UM   | UM      | UM   | UM   | UM   |
| AT5G42655 | UM   | UM   | UM   | UM   | UM      | UM   | UM   | UM   |
| AT5G42660 | UM   | UM   | UM   | UM   | UM      | UM   | UM   | UM   |
| AT5G42670 | gbM  | gbM  | gbM  | gbM  | gbM     | gbM  | mCHH | gbM  |
| AT5G42680 | UM   | UM   | UM   | UM   | UM      | UM   | UM   | UM   |
| AT5G42690 | UM   | UM   | UM   | UM   | UM      | UM   | UM   | UM   |
| AT5G42700 | UM   | UM   | UM   | UM   | UM      | UM   | UM   | UM   |
| AT5G42710 | mCHH | mCHH | mCHH | UM   | UM      | UM   | mCHH | UM   |
| AT5G42720 | UM   | UM   | UM   | UM   | UM      | UM   | UM   | UM   |
| AT5G42740 | gbM  | gbM  | gbM  | gbM  | UM      | gbM  | gbM  | UM   |













|           |      |      |      |      |      |      |      |      |
|-----------|------|------|------|------|------|------|------|------|
| AT5G44770 | gbM  | mCHG | gbM  | mCHG | gbM  | gbM  | mCHH | mCHG |
| AT5G44780 | UM   | UM   | UM   | UM   | UM   | UM   | mCHH | UM   |
| AT5G44785 | UM   |
| AT5G44790 | gbM  |
| AT5G44800 | gbM  | mCHH | gbM  | gbM  | gbM  | gbM  | mCHH | gbM  |
| AT5G44820 | UM   |
| AT5G44830 | mCHH | mCHH | mCHH | mCHG | mCHG | mCHH | mCHH | mCHH |
| AT5G44840 | mCHH | mCHH | mCHH | mCHH | mCHG | mCHH | mCHH | mCHH |
| AT5G44850 | UM   |
| AT5G44860 | UM   |
| AT5G44870 | UM   | UM   | UM   | UM   | UM   | UM   | mCHH | UM   |
| AT5G44894 | UM   |
| AT5G44900 | UM   |
| AT5G44910 | UM   |
| AT5G44920 | UM   |
| AT5G44930 | UM   |
| AT5G44940 | UM   |
| AT5G44950 | UM   |
| AT5G44960 | UM   |
| AT5G44970 | UM   |
| AT5G44973 | UM   |
| AT5G44980 | UM   |
| AT5G44990 | UM   |
| AT5G45000 | UM   |
| AT5G45010 | UM   |
| AT5G45020 | gbM  | gbM  | gbM  | UM   | UM   | UM   | gbM  | UM   |
| AT5G45030 | gbM  |
| AT5G45040 | UM   |
| AT5G45050 | UM   | UM   | UM   | UM   | UM   | UM   | mCHH | UM   |
| AT5G45060 | UM   | mCHH | UM   | UM   | gbM  | gbM  | mCHH | UM   |
| AT5G45070 | UM   |
| AT5G45080 | UM   | UM   | UM   | UM   | UM   | UM   | mCHH | UM   |
| AT5G45090 | UM   |
| AT5G45095 | mCHH | mCHH | mCHH | mCHG | mCHH | mCHH | mCHH | mCHH |
| AT5G45100 | UM   |
| AT5G45105 | mCHH | mCHH | mCHG | mCHG | mCHG | mCHG | mCHH | mCHG |
| AT5G45110 | UM   | UM   | UM   | UM   | UM   | UM   | mCHH | UM   |
| AT5G45113 | UM   |
| AT5G45120 | UM   |
| AT5G45130 | UM   |
| AT5G45140 | gbM  | mCHH | gbM  | gbM  | gbM  | gbM  | mCHH | gbM  |
| AT5G45150 | UM   | UM   | UM   | UM   | UM   | UM   | mCHH | UM   |
| AT5G45160 | gbM  | UM   |
| AT5G45170 | UM   | gbM  | UM   | UM   | UM   | UM   | UM   | UM   |
| AT5G45180 | UM   |
| AT5G45190 | gbM  | gbM  | UM   | UM   | UM   | UM   | mCHH | UM   |
| AT5G45200 | UM   | mCHH | UM   | UM   | UM   | UM   | UM   | UM   |
| AT5G45210 | UM   |





|           |      |      |      |     |     |      |      |      |
|-----------|------|------|------|-----|-----|------|------|------|
| AT5G46100 | UM   | UM   | UM   | UM  | UM  | UM   | UM   | UM   |
| AT5G46110 | UM   | UM   | UM   | UM  | UM  | UM   | UM   | UM   |
| AT5G46115 | UM   | UM   | UM   | UM  | UM  | UM   | UM   | UM   |
| AT5G46130 | UM   | UM   | UM   | UM  | UM  | UM   | UM   | UM   |
| AT5G46140 | UM   | UM   | UM   | UM  | UM  | UM   | UM   | UM   |
| AT5G46150 | UM   | UM   | UM   | UM  | UM  | UM   | mCHH | UM   |
| AT5G46160 | UM   | UM   | UM   | UM  | UM  | UM   | UM   | UM   |
| AT5G46170 | UM   | UM   | UM   | UM  | UM  | UM   | UM   | UM   |
| AT5G46180 | UM   | UM   | UM   | UM  | UM  | UM   | UM   | UM   |
| AT5G46190 | gbM  | gbM  | gbM  | gbM | gbM | gbM  | gbM  | gbM  |
| AT5G46200 | UM   | UM   | UM   | UM  | UM  | UM   | UM   | UM   |
| AT5G46210 | UM   | gbM  | UM   | UM  | UM  | UM   | gbM  | UM   |
| AT5G46220 | UM   | UM   | UM   | UM  | UM  | UM   | mCHH | UM   |
| AT5G46230 | UM   | UM   | UM   | UM  | UM  | UM   | UM   | UM   |
| AT5G46240 | UM   | UM   | UM   | UM  | UM  | UM   | mCHH | UM   |
| AT5G46250 | UM   | UM   | UM   | UM  | UM  | UM   | UM   | UM   |
| AT5G46260 | UM   | UM   | UM   | UM  | UM  | UM   | UM   | UM   |
| AT5G46270 | UM   | UM   | UM   | UM  | UM  | UM   | UM   | UM   |
| AT5G46280 | gbM  | gbM  | gbM  | UM  | UM  | UM   | gbM  | gbM  |
| AT5G46290 | UM   | UM   | UM   | UM  | UM  | UM   | UM   | UM   |
| AT5G46295 | UM   | UM   | UM   | UM  | UM  | UM   | UM   | UM   |
| AT5G46300 | UM   | UM   | UM   | UM  | UM  | UM   | UM   | UM   |
| AT5G46310 | UM   | UM   | UM   | UM  | UM  | UM   | UM   | UM   |
| AT5G46320 | mCHH | mCHH | mCHG | UM  | UM  | mCHH | mCHH | mCHG |
| AT5G46330 | UM   | UM   | UM   | UM  | UM  | UM   | mCHH | UM   |
| AT5G46340 | gbM  | gbM  | gbM  | gbM | gbM | gbM  | gbM  | gbM  |
| AT5G46350 | UM   | UM   | UM   | UM  | UM  | UM   | UM   | UM   |
| AT5G46360 | UM   | UM   | UM   | UM  | UM  | UM   | UM   | UM   |
| AT5G46370 | UM   | UM   | UM   | UM  | UM  | UM   | UM   | UM   |
| AT5G46380 | UM   | UM   | UM   | UM  | UM  | UM   | mCHH | UM   |
| AT5G46390 | UM   | UM   | UM   | UM  | UM  | UM   | UM   | UM   |
| AT5G46400 | gbM  | gbM  | gbM  | UM  | UM  | UM   | gbM  | UM   |
| AT5G46410 | gbM  | gbM  | gbM  | gbM | gbM | gbM  | gbM  | gbM  |
| AT5G46417 | UM   | UM   | UM   | UM  | UM  | UM   | UM   | UM   |
| AT5G46420 | gbM  | gbM  | gbM  | UM  | UM  | UM   | gbM  | UM   |
| AT5G46430 | UM   | UM   | UM   | UM  | UM  | UM   | UM   | UM   |
| AT5G46440 | UM   | UM   | UM   | UM  | UM  | UM   | UM   | UM   |
| AT5G46450 | UM   | UM   | UM   | UM  | UM  | UM   | mCHH | UM   |
| AT5G46460 | UM   | UM   | UM   | UM  | UM  | UM   | UM   | UM   |
| AT5G46470 | mCHH | gbM  | gbM  | gbM | gbM | gbM  | mCHH | gbM  |
| AT5G46490 | UM   | UM   | UM   | UM  | UM  | UM   | UM   | UM   |
| AT5G46500 | UM   | UM   | UM   | UM  | UM  | UM   | UM   | UM   |
| AT5G46510 | gbM  | gbM  | gbM  | UM  | UM  | UM   | gbM  | UM   |
| AT5G46520 | UM   | UM   | UM   | UM  | UM  | UM   | UM   | UM   |
| AT5G46530 | UM   | UM   | UM   | UM  | UM  | UM   | UM   | UM   |
| AT5G46540 | UM   | UM   | UM   | UM  | UM  | UM   | mCHH | UM   |
| AT5G46550 | UM   | UM   | UM   | UM  | UM  | UM   | UM   | UM   |
| AT5G46560 | UM   | UM   | UM   | gbM | UM  | UM   | UM   | UM   |



|           |      |      |      |      |      |      |      |      |
|-----------|------|------|------|------|------|------|------|------|
| AT5G46990 | UM   | UM   | UM   | UM   | UM   | UM   | mCHH | UM   |
| AT5G47000 | UM   |
| AT5G47010 | gbM  |
| AT5G47020 | gbM  | gbM  | gbM  | gbM  | gbM  | gbM  | mCHG | gbM  |
| AT5G47030 | UM   |
| AT5G47040 | UM   | UM   | UM   | UM   | UM   | UM   | mCHH | UM   |
| AT5G47050 | UM   |
| AT5G47060 | UM   |
| AT5G47070 | UM   |
| AT5G47075 | UM   |
| AT5G47077 | UM   |
| AT5G47080 | UM   |
| AT5G47090 | UM   |
| AT5G47100 | UM   |
| AT5G47110 | UM   |
| AT5G47120 | UM   |
| AT5G47130 | UM   |
| AT5G47140 | UM   |
| AT5G47150 | UM   | UM   | UM   | UM   | UM   | UM   | gbM  | UM   |
| AT5G47160 | UM   | UM   | UM   | UM   | UM   | UM   | gbM  | UM   |
| AT5G47170 | UM   |
| AT5G47175 | UM   |
| AT5G47180 | UM   |
| AT5G47190 | UM   |
| AT5G47200 | UM   |
| AT5G47210 | UM   |
| AT5G47220 | UM   |
| AT5G47229 | UM   |
| AT5G47230 | UM   |
| AT5G47240 | UM   |
| AT5G47250 | UM   |
| AT5G47260 | mCHH |
| AT5G47280 | mCHH |
| AT5G47290 | UM   |
| AT5G47300 | mCHH |
| AT5G47306 | UM   |
| AT5G47310 | UM   |
| AT5G47320 | UM   | UM   | gbM  | gbM  | UM   | UM   | UM   | UM   |
| AT5G47330 | UM   |
| AT5G47340 | UM   | UM   | UM   | UM   | UM   | UM   | mCHH | UM   |
| AT5G47350 | UM   |
| AT5G47360 | UM   |
| AT5G47370 | UM   |
| AT5G47380 | UM   |
| AT5G47390 | UM   |
| AT5G47400 | gbM  | gbM  | UM   | UM   | UM   | UM   | gbM  | UM   |
| AT5G47420 | UM   |
| AT5G47430 | UM   |

















|           |      |         |         |         |         |         |         |         |
|-----------|------|---------|---------|---------|---------|---------|---------|---------|
| AT5G50480 | UM   | UM      | UM      | UM      | UM      | UM      | UM      | UM      |
| AT5G50490 | UM   | UM      | UM      | UM      | UM      | UM      | UM      | UM      |
| AT5G50500 | UM   | UM      | UM      | UM      | UM      | UM      | UM      | UM      |
| AT5G50510 | UM   | UM      | UM      | unknown | unknown | unknown | UM      | unknown |
| AT5G50520 | UM   | UM      | UM      | unknown | unknown | unknown | UM      | unknown |
| AT5G50530 | UM   | UM      | UM      | unknown | unknown | unknown | UM      | unknown |
| AT5G50540 | UM   | UM      | UM      | unknown | unknown | unknown | UM      | unknown |
| AT5G50550 | UM   | UM      | unknown | unknown | unknown | unknown | UM      | unknown |
| AT5G50560 | UM   | unknown | unknown | unknown | unknown | unknown | UM      | unknown |
| AT5G50562 | UM   | UM      | UM      | unknown | unknown | unknown | UM      | unknown |
| AT5G50570 | UM   | UM      | UM      | unknown | unknown | unknown | UM      | unknown |
| AT5G50580 | UM   | UM      | UM      | unknown | unknown | unknown | UM      | unknown |
| AT5G50590 | UM   | UM      | unknown | unknown | UM      | UM      | UM      | UM      |
| AT5G50600 | UM   | UM      | UM      | unknown | unknown | unknown | UM      | unknown |
| AT5G50610 | UM   | unknown | UM      | unknown | unknown | unknown | UM      | unknown |
| AT5G50630 | UM   | UM      | UM      | unknown | unknown | unknown | UM      | unknown |
| AT5G50640 | UM   | UM      | UM      | UM      | unknown | unknown | UM      | unknown |
| AT5G50645 | UM   | UM      | UM      | unknown | unknown | unknown | UM      | unknown |
| AT5G50650 | UM   | UM      | UM      | unknown | unknown | unknown | UM      | unknown |
| AT5G50660 | UM   | unknown | unknown | unknown | unknown | unknown | UM      | unknown |
| AT5G50665 | UM   | UM      | unknown | unknown | unknown | unknown | UM      | unknown |
| AT5G50670 | UM   | UM      | UM      | unknown | unknown | unknown | UM      | UM      |
| AT5G50680 | UM   | UM      | UM      | unknown | unknown | unknown | UM      | unknown |
| AT5G50690 | UM   | UM      | unknown | unknown | unknown | unknown | UM      | UM      |
| AT5G50700 | UM   | UM      | UM      | unknown | unknown | unknown | UM      | unknown |
| AT5G50710 | UM   | unknown |
| AT5G50720 | UM   | UM      | UM      | UM      | UM      | UM      | UM      | UM      |
| AT5G50740 | mCHH | UM      | mCHH    | UM      | UM      | UM      | UM      | UM      |
| AT5G50750 | UM   | UM      | UM      | UM      | UM      | UM      | UM      | UM      |
| AT5G50760 | UM   | UM      | UM      | UM      | UM      | UM      | UM      | UM      |
| AT5G50770 | UM   | UM      | UM      | UM      | UM      | UM      | mCHH    | UM      |
| AT5G50780 | gbM  | gbM     | gbM     | UM      | UM      | UM      | mCHH    | UM      |
| AT5G50790 | UM   | UM      | UM      | UM      | UM      | UM      | UM      | UM      |
| AT5G50800 | UM   | UM      | UM      | UM      | UM      | UM      | UM      | UM      |
| AT5G50801 | UM   | UM      | UM      | UM      | UM      | UM      | UM      | UM      |
| AT5G50810 | UM   | UM      | UM      | UM      | UM      | UM      | UM      | UM      |
| AT5G50820 | UM   | UM      | UM      | UM      | UM      | UM      | UM      | UM      |
| AT5G50830 | UM   | UM      | UM      | UM      | UM      | UM      | UM      | UM      |
| AT5G50840 | UM   | UM      | UM      | UM      | UM      | UM      | UM      | UM      |
| AT5G50850 | UM   | UM      | UM      | UM      | UM      | UM      | UM      | UM      |
| AT5G50860 | UM   | UM      | UM      | UM      | UM      | UM      | UM      | UM      |
| AT5G50870 | UM   | UM      | UM      | UM      | UM      | UM      | UM      | UM      |
| AT5G50880 | mCHH | mCHH    | mCHH    | mCHG    | mCHG    | mCHG    | mCHH    | mCHH    |
| AT5G50890 | UM   | UM      | UM      | UM      | UM      | UM      | UM      | UM      |
| AT5G50900 | UM   | UM      | UM      | UM      | UM      | UM      | UM      | UM      |
| AT5G50910 | UM   | UM      | UM      | UM      | UM      | UM      | UM      | UM      |
| AT5G50915 | UM   | UM      | UM      | UM      | UM      | UM      | UM      | UM      |
| AT5G50920 | gbM  | gbM     | gbM     | gbM     | gbM     | gbM     | mCHH    | gbM     |

|           |      |      |      |      |      |      |      |      |
|-----------|------|------|------|------|------|------|------|------|
| AT5G50930 | UM   |
| AT5G50940 | UM   |
| AT5G50950 | UM   |
| AT5G50960 | gbM  |
| AT5G50970 | UM   |
| AT5G50990 | gbM  |
| AT5G51000 | mCHH | mCHH | mCHH | UM   | mCHH | UM   | mCHH | mCHH |
| AT5G51010 | mCHH | UM   |
| AT5G51020 | UM   |
| AT5G51030 | UM   |
| AT5G51040 | UM   |
| AT5G51050 | UM   |
| AT5G51060 | UM   |
| AT5G51070 | UM   |
| AT5G51080 | UM   |
| AT5G51090 | mCHH | mCHH | mCHH | mCHG | mCHH | mCHG | mCHH | mCHG |
| AT5G51100 | UM   | UM   | mCHG | UM   | UM   | UM   | mCHH | UM   |
| AT5G51105 | UM   |
| AT5G51110 | UM   |
| AT5G51120 | UM   |
| AT5G51130 | gbM  | UM   |
| AT5G51140 | UM   | UM   | UM   | UM   | UM   | UM   | gbM  | UM   |
| AT5G51150 | UM   |
| AT5G51160 | UM   |
| AT5G51170 | UM   |
| AT5G51180 | UM   |
| AT5G51190 | UM   |
| AT5G51195 | mCHH |
| AT5G51200 | gbM  | mCHH | gbM  | gbM  | gbM  | gbM  | mCHH | gbM  |
| AT5G51210 | UM   |
| AT5G51220 | UM   |
| AT5G51230 | gbM  | gbM  | gbM  | gbM  | gbM  | gbM  | mCHH | gbM  |
| AT5G51250 | UM   |
| AT5G51260 | UM   |
| AT5G51270 | UM   | mCHH | UM   | UM   | UM   | UM   | mCHH | UM   |
| AT5G51280 | UM   |
| AT5G51290 | UM   |
| AT5G51300 | UM   |
| AT5G51310 | UM   |
| AT5G51330 | UM   |
| AT5G51340 | gbM  | mCHH | gbM  | gbM  | gbM  | gbM  | gbM  | gbM  |
| AT5G51350 | UM   |
| AT5G51360 | UM   |
| AT5G51370 | UM   |
| AT5G51380 | UM   |
| AT5G51390 | UM   |
| AT5G51400 | UM   |
| AT5G51410 | gbM  | UM   | UM   | UM   | UM   | UM   | mCHH | UM   |

|           |      |      |      |      |      |      |      |      |
|-----------|------|------|------|------|------|------|------|------|
| AT5G51420 | UM   | UM   | UM   | UM   | UM   | UM   | mCHH | UM   |
| AT5G51430 | UM   |
| AT5G51440 | UM   |
| AT5G51450 | gbM  | gbM  | gbM  | gbM  | UM   | gbM  | gbM  | gbM  |
| AT5G51451 | gbM  | gbM  | gbM  | gbM  | gbM  | UM   | gbM  | gbM  |
| AT5G51460 | gbM  | gbM  | UM   | UM   | UM   | UM   | gbM  | UM   |
| AT5G51470 | UM   |
| AT5G51480 | UM   | UM   | UM   | UM   | UM   | UM   | mCHH | UM   |
| AT5G51490 | UM   |
| AT5G51500 | UM   |
| AT5G51510 | UM   |
| AT5G51520 | UM   |
| AT5G51530 | UM   | mCHH | UM   | UM   | UM   | UM   | UM   | UM   |
| AT5G51540 | gbM  | gbM  | gbM  | gbM  | UM   | gbM  | gbM  | gbM  |
| AT5G51545 | UM   |
| AT5G51550 | UM   |
| AT5G51560 | UM   | UM   | UM   | UM   | gbM  | UM   | gbM  | gbM  |
| AT5G51570 | UM   |
| AT5G51580 | UM   |
| AT5G51590 | UM   | UM   | UM   | UM   | UM   | UM   | mCHH | UM   |
| AT5G51600 | UM   |
| AT5G51610 | UM   |
| AT5G51620 | UM   |
| AT5G51630 | gbM  | mCHH | gbM  | gbM  | gbM  | gbM  | gbM  | UM   |
| AT5G51640 | gbM  |
| AT5G51650 | mCHH |
| AT5G51660 | gbM  | gbM  | gbM  | gbM  | gbM  | gbM  | mCHH | gbM  |
| AT5G51670 | UM   |
| AT5G51680 | UM   | gbM  | UM   | gbM  | gbM  | UM   | gbM  | UM   |
| AT5G51690 | UM   |
| AT5G51700 | UM   |
| AT5G51710 | UM   | mCHH | UM   | UM   | UM   | UM   | mCHH | UM   |
| AT5G51720 | UM   |
| AT5G51730 | UM   |
| AT5G51740 | UM   |
| AT5G51750 | UM   |
| AT5G51760 | UM   |
| AT5G51770 | UM   |
| AT5G51780 | UM   |
| AT5G51790 | UM   |
| AT5G51795 | UM   | UM   | UM   | UM   | UM   | UM   | mCHH | UM   |
| AT5G51800 | UM   |
| AT5G51810 | UM   |
| AT5G51812 | UM   |
| AT5G51820 | UM   |
| AT5G51830 | UM   |
| AT5G51840 | UM   | gbM  | UM   | gbM  | gbM  | gbM  | mCHH | gbM  |
| AT5G51845 | UM   |









|           |      |      |      |      |      |      |      |     |
|-----------|------|------|------|------|------|------|------|-----|
| AT5G53200 | UM   | UM  |
| AT5G53205 | UM   | UM  |
| AT5G53210 | UM   | UM  |
| AT5G53220 | UM   | UM  |
| AT5G53230 | UM   | UM  |
| AT5G53240 | UM   | UM  |
| AT5G53250 | UM   | UM  |
| AT5G53260 | UM   | UM  |
| AT5G53270 | UM   | UM  |
| AT5G53280 | UM   | UM   | UM   | UM   | UM   | UM   | mCHH | UM  |
| AT5G53290 | UM   | UM  |
| AT5G53300 | UM   | UM  |
| AT5G53310 | UM   | UM  |
| AT5G53320 | gbM  | gbM  | UM   | UM   | UM   | UM   | gbM  | UM  |
| AT5G53330 | UM   | UM  |
| AT5G53340 | UM   | UM  |
| AT5G53350 | UM   | UM  |
| AT5G53360 | UM   | UM  |
| AT5G53370 | UM   | UM  |
| AT5G53380 | UM   | UM  |
| AT5G53390 | UM   | UM  |
| AT5G53400 | UM   | UM  |
| AT5G53410 | mCHH | mCHH | mCHH | mCHG | mCHH | mCHG | mCHH | gbM |
| AT5G53420 | UM   | UM  |
| AT5G53430 | UM   | UM  |
| AT5G53440 | gbM  | mCHH | gbM  | gbM  | gbM  | gbM  | mCHH | gbM |
| AT5G53450 | gbM  | gbM  | UM   | gbM  | gbM  | gbM  | mCHH | gbM |
| AT5G53451 | UM   | UM  |
| AT5G53460 | gbM  | gbM  | gbM  | gbM  | gbM  | gbM  | mCHH | gbM |
| AT5G53470 | UM   | UM  |
| AT5G53480 | gbM  | gbM |
| AT5G53486 | UM   | UM  |
| AT5G53490 | UM   | UM  |
| AT5G53500 | UM   | UM  |
| AT5G53510 | UM   | UM  |
| AT5G53520 | UM   | UM  |
| AT5G53530 | gbM  | gbM  | gbM  | gbM  | gbM  | UM   | gbM  | UM  |
| AT5G53540 | UM   | UM  |
| AT5G53550 | UM   | UM  |
| AT5G53560 | UM   | UM  |
| AT5G53570 | gbM  | gbM  | gbM  | UM   | UM   | UM   | mCHH | UM  |
| AT5G53580 | UM   | UM  |
| AT5G53588 | UM   | UM  |
| AT5G53590 | UM   | UM  |
| AT5G53592 | UM   | UM  |
| AT5G53600 | UM   | UM  |
| AT5G53610 | UM   | UM  |
| AT5G53620 | UM   | UM  |







|           |     |      |     |     |     |     |      |     |
|-----------|-----|------|-----|-----|-----|-----|------|-----|
| AT5G54930 | gbM | gbM  | gbM | gbM | gbM | gbM | gbM  | gbM |
| AT5G54940 | UM  | UM   | UM  | UM  | UM  | UM  | UM   | UM  |
| AT5G54950 | UM  | UM   | UM  | UM  | UM  | UM  | UM   | UM  |
| AT5G54960 | UM  | UM   | UM  | UM  | UM  | UM  | UM   | UM  |
| AT5G54970 | UM  | UM   | UM  | UM  | UM  | UM  | UM   | UM  |
| AT5G54980 | UM  | UM   | UM  | UM  | UM  | UM  | UM   | UM  |
| AT5G54990 | UM  | UM   | UM  | UM  | UM  | UM  | UM   | UM  |
| AT5G55000 | gbM | gbM  | gbM | gbM | gbM | gbM | gbM  | gbM |
| AT5G55010 | UM  | UM   | UM  | UM  | UM  | UM  | UM   | UM  |
| AT5G55020 | UM  | UM   | UM  | UM  | UM  | UM  | UM   | UM  |
| AT5G55040 | gbM | gbM  | gbM | gbM | gbM | gbM | gbM  | gbM |
| AT5G55050 | UM  | UM   | UM  | UM  | UM  | UM  | UM   | UM  |
| AT5G55056 | UM  | UM   | UM  | UM  | UM  | UM  | UM   | UM  |
| AT5G55060 | UM  | UM   | UM  | UM  | UM  | UM  | UM   | UM  |
| AT5G55070 | UM  | UM   | UM  | UM  | UM  | UM  | mCHG | UM  |
| AT5G55080 | UM  | UM   | UM  | UM  | UM  | UM  | UM   | UM  |
| AT5G55090 | UM  | UM   | UM  | UM  | UM  | UM  | mCHH | UM  |
| AT5G55100 | UM  | mCHH | UM  | UM  | UM  | UM  | UM   | UM  |
| AT5G55110 | UM  | UM   | UM  | UM  | UM  | UM  | UM   | UM  |
| AT5G55120 | gbM | gbM  | gbM | gbM | gbM | gbM | mCHH | gbM |
| AT5G55125 | UM  | UM   | UM  | UM  | UM  | UM  | UM   | UM  |
| AT5G55130 | gbM | gbM  | gbM | UM  | UM  | UM  | gbM  | UM  |
| AT5G55131 | UM  | UM   | UM  | UM  | UM  | UM  | UM   | UM  |
| AT5G55132 | UM  | UM   | UM  | UM  | UM  | UM  | mCHH | UM  |
| AT5G55135 | UM  | UM   | UM  | UM  | UM  | UM  | UM   | UM  |
| AT5G55140 | UM  | UM   | UM  | UM  | UM  | UM  | UM   | UM  |
| AT5G55150 | UM  | UM   | UM  | UM  | UM  | UM  | UM   | UM  |
| AT5G55160 | UM  | UM   | UM  | UM  | UM  | UM  | UM   | UM  |
| AT5G55170 | UM  | UM   | UM  | UM  | UM  | UM  | UM   | UM  |
| AT5G55180 | UM  | UM   | UM  | UM  | UM  | UM  | UM   | UM  |
| AT5G55190 | UM  | UM   | UM  | UM  | UM  | UM  | UM   | UM  |
| AT5G55200 | UM  | UM   | UM  | UM  | UM  | UM  | UM   | UM  |
| AT5G55210 | UM  | UM   | UM  | UM  | UM  | UM  | UM   | UM  |
| AT5G55220 | UM  | UM   | UM  | UM  | UM  | UM  | UM   | UM  |
| AT5G55230 | UM  | UM   | UM  | UM  | UM  | UM  | mCHH | UM  |
| AT5G55240 | UM  | UM   | UM  | UM  | UM  | UM  | UM   | UM  |
| AT5G55250 | UM  | UM   | UM  | UM  | UM  | UM  | UM   | UM  |
| AT5G55260 | UM  | UM   | UM  | UM  | UM  | UM  | UM   | UM  |
| AT5G55270 | UM  | UM   | UM  | UM  | UM  | UM  | UM   | UM  |
| AT5G55280 | UM  | UM   | UM  | UM  | UM  | UM  | UM   | UM  |
| AT5G55290 | UM  | UM   | UM  | UM  | UM  | UM  | UM   | UM  |
| AT5G55300 | UM  | mCHH | UM  | UM  | UM  | UM  | mCHH | UM  |
| AT5G55310 | UM  | UM   | UM  | UM  | UM  | UM  | mCHH | UM  |
| AT5G55320 | UM  | UM   | UM  | UM  | UM  | UM  | UM   | UM  |
| AT5G55330 | UM  | UM   | UM  | UM  | UM  | UM  | mCHH | UM  |
| AT5G55340 | UM  | UM   | UM  | UM  | UM  | UM  | UM   | UM  |
| AT5G55350 | UM  | UM   | UM  | UM  | UM  | UM  | UM   | UM  |
| AT5G55360 | UM  | UM   | UM  | UM  | UM  | UM  | UM   | UM  |



|           |      |      |      |     |     |     |      |     |
|-----------|------|------|------|-----|-----|-----|------|-----|
| AT5G55370 | UM   | UM   | UM   | UM  | UM  | UM  | UM   | UM  |
| AT5G55380 | UM   | UM   | UM   | UM  | UM  | UM  | UM   | UM  |
| AT5G55390 | gbM  | mCHG | gbM  | gbM | gbM | gbM | gbM  | gbM |
| AT5G55400 | UM   | UM   | UM   | gbM | UM  | UM  | mCHH | UM  |
| AT5G55410 | UM   | UM   | UM   | UM  | UM  | UM  | UM   | UM  |
| AT5G55430 | UM   | UM   | UM   | UM  | UM  | UM  | UM   | UM  |
| AT5G55440 | UM   | UM   | UM   | UM  | UM  | UM  | UM   | UM  |
| AT5G55450 | UM   | UM   | UM   | UM  | UM  | UM  | UM   | UM  |
| AT5G55460 | UM   | UM   | UM   | UM  | UM  | UM  | UM   | UM  |
| AT5G55470 | gbM  | mCHH | gbM  | UM  | UM  | UM  | gbM  | UM  |
| AT5G55480 | gbM  | gbM  | gbM  | gbM | gbM | gbM | gbM  | gbM |
| AT5G55490 | UM   | UM   | UM   | UM  | UM  | UM  | UM   | UM  |
| AT5G55500 | UM   | UM   | UM   | UM  | gbM | UM  | gbM  | UM  |
| AT5G55507 | UM   | UM   | UM   | UM  | UM  | UM  | UM   | UM  |
| AT5G55508 | UM   | UM   | UM   | UM  | UM  | UM  | mCHH | UM  |
| AT5G55510 | UM   | UM   | UM   | UM  | UM  | UM  | UM   | UM  |
| AT5G55520 | UM   | UM   | UM   | UM  | UM  | UM  | UM   | UM  |
| AT5G55530 | gbM  | gbM  | gbM  | UM  | gbM | UM  | gbM  | UM  |
| AT5G55540 | gbM  | gbM  | gbM  | gbM | gbM | gbM | mCHH | gbM |
| AT5G55550 | UM   | UM   | UM   | UM  | UM  | UM  | UM   | UM  |
| AT5G55560 | UM   | UM   | UM   | UM  | UM  | UM  | UM   | UM  |
| AT5G55565 | UM   | UM   | UM   | UM  | UM  | UM  | UM   | UM  |
| AT5G55570 | UM   | UM   | UM   | UM  | UM  | UM  | UM   | UM  |
| AT5G55580 | UM   | UM   | UM   | UM  | UM  | UM  | UM   | UM  |
| AT5G55590 | UM   | UM   | UM   | UM  | UM  | UM  | UM   | UM  |
| AT5G55600 | gbM  | gbM  | gbM  | UM  | UM  | UM  | gbM  | UM  |
| AT5G55610 | UM   | gbM  | UM   | UM  | UM  | UM  | gbM  | UM  |
| AT5G55620 | UM   | UM   | UM   | UM  | UM  | UM  | UM   | UM  |
| AT5G55630 | UM   | UM   | UM   | UM  | UM  | UM  | UM   | UM  |
| AT5G55640 | UM   | UM   | UM   | UM  | UM  | UM  | UM   | UM  |
| AT5G55650 | UM   | UM   | UM   | UM  | UM  | UM  | UM   | UM  |
| AT5G55660 | mCHH | mCHH | mCHH | UM  | UM  | UM  | mCHH | UM  |
| AT5G55670 | gbM  | gbM  | gbM  | UM  | UM  | UM  | gbM  | UM  |
| AT5G55680 | UM   | UM   | UM   | UM  | UM  | UM  | UM   | UM  |
| AT5G55690 | UM   | UM   | UM   | UM  | UM  | UM  | UM   | UM  |
| AT5G55700 | UM   | UM   | UM   | UM  | UM  | UM  | UM   | UM  |
| AT5G55710 | UM   | UM   | UM   | UM  | UM  | UM  | UM   | UM  |
| AT5G55720 | UM   | UM   | UM   | UM  | UM  | UM  | UM   | UM  |
| AT5G55730 | UM   | UM   | UM   | UM  | UM  | UM  | UM   | UM  |
| AT5G55740 | UM   | UM   | UM   | UM  | UM  | UM  | UM   | UM  |
| AT5G55750 | UM   | UM   | UM   | UM  | UM  | UM  | UM   | UM  |
| AT5G55760 | UM   | UM   | UM   | UM  | UM  | UM  | UM   | UM  |
| AT5G55770 | UM   | UM   | UM   | UM  | UM  | UM  | UM   | UM  |
| AT5G55780 | UM   | UM   | UM   | UM  | UM  | UM  | UM   | UM  |
| AT5G55790 | UM   | UM   | UM   | UM  | UM  | UM  | UM   | UM  |
| AT5G55800 | mCHH | mCHH | UM   | UM  | UM  | UM  | mCHH | UM  |
| AT5G55810 | UM   | UM   | UM   | UM  | UM  | UM  | UM   | UM  |
| AT5G55820 | mCHH | mCHH | gbM  | UM  | UM  | UM  | mCHH | UM  |







|           |     |      |     |     |     |     |      |     |
|-----------|-----|------|-----|-----|-----|-----|------|-----|
| AT5G57150 | UM  | UM   | UM  | UM  | UM  | UM  | UM   | UM  |
| AT5G57160 | gbM | mCHH | UM  | UM  | UM  | UM  | mCHH | UM  |
| AT5G57170 | UM  | UM   | UM  | UM  | UM  | UM  | UM   | UM  |
| AT5G57180 | UM  | UM   | UM  | UM  | UM  | UM  | UM   | UM  |
| AT5G57181 | UM  | UM   | UM  | UM  | UM  | UM  | UM   | UM  |
| AT5G57190 | UM  | UM   | UM  | UM  | UM  | UM  | UM   | UM  |
| AT5G57200 | UM  | UM   | UM  | UM  | UM  | UM  | UM   | UM  |
| AT5G57210 | gbM | mCHH | gbM | gbM | gbM | gbM | gbM  | gbM |
| AT5G57220 | UM  | UM   | UM  | UM  | UM  | UM  | UM   | UM  |
| AT5G57230 | UM  | UM   | UM  | UM  | UM  | UM  | UM   | UM  |
| AT5G57240 | UM  | UM   | UM  | UM  | UM  | UM  | UM   | UM  |
| AT5G57250 | UM  | UM   | UM  | UM  | UM  | UM  | UM   | UM  |
| AT5G57260 | UM  | UM   | UM  | UM  | UM  | UM  | UM   | UM  |
| AT5G57270 | UM  | UM   | UM  | UM  | UM  | UM  | UM   | UM  |
| AT5G57280 | UM  | UM   | UM  | UM  | UM  | UM  | UM   | UM  |
| AT5G57290 | UM  | UM   | UM  | UM  | UM  | UM  | UM   | UM  |
| AT5G57300 | UM  | UM   | UM  | UM  | UM  | UM  | UM   | UM  |
| AT5G57310 | UM  | UM   | UM  | UM  | UM  | UM  | UM   | UM  |
| AT5G57320 | gbM | mCHH | gbM | gbM | gbM | gbM | gbM  | gbM |
| AT5G57330 | gbM | gbM  | gbM | gbM | gbM | gbM | gbM  | gbM |
| AT5G57340 | UM  | UM   | UM  | UM  | UM  | UM  | UM   | UM  |
| AT5G57345 | UM  | UM   | UM  | UM  | UM  | UM  | UM   | UM  |
| AT5G57350 | UM  | UM   | UM  | UM  | UM  | UM  | UM   | UM  |
| AT5G57360 | gbM | gbM  | gbM | gbM | gbM | gbM | gbM  | gbM |
| AT5G57370 | UM  | UM   | UM  | UM  | UM  | UM  | UM   | UM  |
| AT5G57380 | UM  | UM   | UM  | UM  | UM  | UM  | UM   | UM  |
| AT5G57390 | UM  | UM   | UM  | UM  | UM  | UM  | UM   | UM  |
| AT5G57391 | UM  | UM   | UM  | UM  | UM  | UM  | UM   | UM  |
| AT5G57400 | UM  | UM   | UM  | UM  | UM  | UM  | UM   | UM  |
| AT5G57410 | UM  | UM   | UM  | UM  | UM  | UM  | UM   | UM  |
| AT5G57420 | UM  | UM   | UM  | UM  | UM  | UM  | UM   | UM  |
| AT5G57440 | UM  | UM   | UM  | UM  | UM  | UM  | UM   | UM  |
| AT5G57450 | UM  | UM   | UM  | UM  | UM  | UM  | UM   | UM  |
| AT5G57460 | UM  | UM   | UM  | UM  | UM  | UM  | UM   | UM  |
| AT5G57480 | UM  | UM   | UM  | UM  | UM  | UM  | UM   | UM  |
| AT5G57490 | UM  | UM   | UM  | UM  | UM  | UM  | UM   | UM  |
| AT5G57500 | UM  | UM   | UM  | UM  | UM  | UM  | UM   | UM  |
| AT5G57510 | UM  | UM   | UM  | UM  | UM  | UM  | UM   | UM  |
| AT5G57520 | UM  | UM   | UM  | UM  | UM  | UM  | UM   | UM  |
| AT5G57530 | UM  | UM   | UM  | UM  | UM  | UM  | UM   | UM  |
| AT5G57535 | UM  | UM   | UM  | UM  | UM  | UM  | UM   | UM  |
| AT5G57540 | UM  | UM   | UM  | UM  | UM  | UM  | UM   | UM  |
| AT5G57550 | UM  | UM   | UM  | UM  | UM  | UM  | UM   | UM  |
| AT5G57560 | UM  | UM   | UM  | UM  | UM  | UM  | UM   | UM  |
| AT5G57565 | UM  | UM   | UM  | UM  | UM  | UM  | UM   | UM  |
| AT5G57567 | UM  | UM   | UM  | UM  | UM  | UM  | UM   | UM  |
| AT5G57570 | UM  | UM   | UM  | UM  | UM  | UM  | UM   | UM  |
| AT5G57580 | gbM | mCHG | gbM | gbM | gbM | gbM | gbM  | gbM |

|           |      |      |      |      |      |      |      |      |
|-----------|------|------|------|------|------|------|------|------|
| AT5G57590 | UM   |
| AT5G57610 | gbM  |
| AT5G57620 | UM   |
| AT5G57625 | UM   |
| AT5G57630 | UM   |
| AT5G57640 | UM   |
| AT5G57650 | UM   |
| AT5G57655 | UM   |
| AT5G57660 | UM   |
| AT5G57670 | mCHH |
| AT5G57685 | UM   |
| AT5G57690 | UM   |
| AT5G57700 | UM   |
| AT5G57710 | UM   |
| AT5G57720 | UM   |
| AT5G57730 | UM   | UM   | UM   | UM   | UM   | UM   | mCHH | UM   |
| AT5G57740 | UM   |
| AT5G57747 | UM   |
| AT5G57750 | UM   |
| AT5G57760 | UM   |
| AT5G57770 | UM   |
| AT5G57780 | UM   |
| AT5G57785 | UM   |
| AT5G57790 | UM   |
| AT5G57800 | UM   |
| AT5G57810 | UM   |
| AT5G57815 | UM   |
| AT5G57820 | UM   |
| AT5G57830 | UM   |
| AT5G57840 | UM   |
| AT5G57850 | UM   |
| AT5G57860 | UM   |
| AT5G57870 | gbM  | mCHH | gbM  | gbM  | gbM  | gbM  | gbM  | gbM  |
| AT5G57880 | UM   |
| AT5G57887 | UM   |
| AT5G57890 | mCHH | mCHH | mCHH | UM   | UM   | UM   | mCHH | UM   |
| AT5G57900 | UM   |
| AT5G57910 | UM   |
| AT5G57920 | UM   |
| AT5G57930 | UM   |
| AT5G57940 | gbM  |
| AT5G57950 | UM   |
| AT5G57960 | UM   |
| AT5G57970 | UM   |
| AT5G57980 | UM   |
| AT5G57990 | UM   | UM   | UM   | UM   | UM   | UM   | gbM  | UM   |
| AT5G58000 | UM   |
| AT5G58003 | UM   |

|           |     |      |     |     |     |     |      |     |
|-----------|-----|------|-----|-----|-----|-----|------|-----|
| AT5G58005 | UM  | UM   | UM  | UM  | UM  | UM  | UM   | UM  |
| AT5G58010 | UM  | UM   | UM  | UM  | UM  | UM  | UM   | UM  |
| AT5G58020 | UM  | UM   | UM  | UM  | UM  | UM  | UM   | UM  |
| AT5G58030 | UM  | UM   | UM  | UM  | UM  | UM  | UM   | UM  |
| AT5G58040 | gbM | mCHH | gbM | gbM | gbM | gbM | gbM  | gbM |
| AT5G58050 | UM  | UM   | UM  | UM  | UM  | UM  | UM   | UM  |
| AT5G58060 | UM  | UM   | UM  | UM  | UM  | UM  | UM   | UM  |
| AT5G58070 | UM  | UM   | UM  | UM  | UM  | UM  | UM   | UM  |
| AT5G58080 | UM  | UM   | UM  | UM  | UM  | UM  | UM   | UM  |
| AT5G58090 | UM  | UM   | UM  | UM  | UM  | UM  | UM   | UM  |
| AT5G58100 | gbM | gbM  | gbM | gbM | gbM | gbM | mCHH | gbM |
| AT5G58110 | UM  | UM   | UM  | UM  | UM  | UM  | UM   | UM  |
| AT5G58120 | UM  | UM   | UM  | UM  | UM  | UM  | UM   | UM  |
| AT5G58130 | UM  | UM   | UM  | UM  | UM  | UM  | UM   | UM  |
| AT5G58140 | UM  | gbM  | UM  | gbM | UM  | UM  | mCHH | gbM |
| AT5G58150 | UM  | UM   | UM  | UM  | UM  | UM  | UM   | UM  |
| AT5G58160 | UM  | mCHH | UM  | UM  | UM  | UM  | UM   | UM  |
| AT5G58170 | UM  | UM   | UM  | UM  | UM  | UM  | UM   | UM  |
| AT5G58180 | UM  | UM   | UM  | UM  | UM  | UM  | UM   | UM  |
| AT5G58190 | UM  | mCHH | UM  | UM  | UM  | UM  | UM   | UM  |
| AT5G58200 | UM  | mCHH | UM  | UM  | UM  | UM  | UM   | UM  |
| AT5G58210 | UM  | UM   | UM  | UM  | UM  | UM  | UM   | UM  |
| AT5G58220 | UM  | UM   | UM  | UM  | UM  | UM  | UM   | UM  |
| AT5G58230 | UM  | UM   | UM  | UM  | UM  | UM  | UM   | UM  |
| AT5G58240 | UM  | UM   | UM  | UM  | UM  | UM  | UM   | UM  |
| AT5G58250 | UM  | UM   | UM  | UM  | UM  | UM  | mCHG | UM  |
| AT5G58260 | UM  | UM   | UM  | UM  | UM  | UM  | UM   | UM  |
| AT5G58270 | UM  | UM   | UM  | UM  | UM  | UM  | mCHH | UM  |
| AT5G58280 | UM  | UM   | UM  | UM  | UM  | UM  | mCHH | UM  |
| AT5G58290 | UM  | UM   | UM  | UM  | UM  | UM  | UM   | UM  |
| AT5G58300 | UM  | UM   | UM  | UM  | UM  | UM  | UM   | UM  |
| AT5G58310 | UM  | UM   | UM  | UM  | UM  | UM  | UM   | UM  |
| AT5G58320 | UM  | UM   | UM  | UM  | UM  | UM  | UM   | UM  |
| AT5G58330 | UM  | UM   | UM  | UM  | UM  | UM  | UM   | UM  |
| AT5G58340 | UM  | UM   | UM  | UM  | UM  | UM  | UM   | UM  |
| AT5G58350 | UM  | UM   | UM  | UM  | UM  | UM  | UM   | UM  |
| AT5G58360 | UM  | UM   | UM  | UM  | UM  | UM  | mCHH | UM  |
| AT5G58370 | UM  | UM   | UM  | UM  | UM  | UM  | UM   | UM  |
| AT5G58375 | UM  | UM   | UM  | UM  | UM  | UM  | UM   | UM  |
| AT5G58380 | UM  | UM   | UM  | UM  | UM  | UM  | UM   | UM  |
| AT5G58390 | UM  | UM   | UM  | UM  | UM  | UM  | UM   | UM  |
| AT5G58400 | UM  | UM   | UM  | UM  | UM  | UM  | UM   | UM  |
| AT5G58410 | gbM | gbM  | gbM | gbM | gbM | gbM | mCHH | gbM |
| AT5G58412 | UM  | UM   | UM  | UM  | UM  | UM  | UM   | UM  |
| AT5G58420 | UM  | UM   | UM  | UM  | UM  | UM  | UM   | UM  |
| AT5G58430 | UM  | UM   | UM  | UM  | UM  | UM  | UM   | UM  |
| AT5G58440 | UM  | UM   | UM  | UM  | UM  | UM  | UM   | UM  |
| AT5G58450 | gbM | gbM  | gbM | gbM | gbM | gbM | gbM  | gbM |

|           |     |      |      |     |     |     |      |     |
|-----------|-----|------|------|-----|-----|-----|------|-----|
| AT5G58460 | UM  | UM   | UM   | UM  | UM  | UM  | UM   | UM  |
| AT5G58470 | UM  | UM   | UM   | UM  | UM  | UM  | UM   | UM  |
| AT5G58480 | UM  | UM   | UM   | UM  | UM  | UM  | UM   | UM  |
| AT5G58490 | UM  | UM   | UM   | UM  | UM  | UM  | UM   | UM  |
| AT5G58500 | UM  | UM   | UM   | UM  | UM  | UM  | UM   | UM  |
| AT5G58510 | gbM | mCHH | gbM  | UM  | UM  | UM  | gbM  | UM  |
| AT5G58520 | UM  | UM   | UM   | UM  | UM  | UM  | UM   | UM  |
| AT5G58530 | UM  | UM   | UM   | UM  | UM  | UM  | UM   | UM  |
| AT5G58540 | gbM | gbM  | UM   | UM  | UM  | UM  | gbM  | gbM |
| AT5G58550 | gbM | gbM  | gbM  | UM  | gbM | UM  | gbM  | gbM |
| AT5G58560 | UM  | UM   | UM   | UM  | UM  | UM  | UM   | UM  |
| AT5G58570 | UM  | gbM  | UM   | UM  | gbM | UM  | UM   | gbM |
| AT5G58575 | UM  | UM   | UM   | UM  | UM  | UM  | UM   | UM  |
| AT5G58580 | UM  | UM   | UM   | UM  | UM  | UM  | UM   | UM  |
| AT5G58590 | UM  | UM   | UM   | UM  | UM  | UM  | UM   | UM  |
| AT5G58600 | UM  | UM   | UM   | UM  | UM  | UM  | UM   | UM  |
| AT5G58610 | UM  | mCHH | UM   | UM  | UM  | UM  | UM   | UM  |
| AT5G58620 | gbM | gbM  | gbM  | gbM | UM  | gbM | gbM  | gbM |
| AT5G58630 | UM  | UM   | UM   | UM  | UM  | UM  | mCHH | UM  |
| AT5G58640 | UM  | UM   | UM   | UM  | UM  | UM  | UM   | UM  |
| AT5G58650 | UM  | UM   | UM   | UM  | UM  | UM  | UM   | UM  |
| AT5G58660 | UM  | UM   | UM   | UM  | UM  | UM  | UM   | UM  |
| AT5G58670 | UM  | UM   | UM   | UM  | UM  | UM  | UM   | UM  |
| AT5G58680 | UM  | UM   | UM   | UM  | UM  | UM  | UM   | UM  |
| AT5G58690 | UM  | UM   | UM   | UM  | UM  | UM  | UM   | UM  |
| AT5G58700 | UM  | UM   | UM   | UM  | UM  | UM  | UM   | UM  |
| AT5G58710 | UM  | UM   | UM   | UM  | UM  | UM  | UM   | UM  |
| AT5G58720 | UM  | UM   | UM   | UM  | UM  | UM  | UM   | UM  |
| AT5G58730 | UM  | UM   | UM   | UM  | UM  | UM  | UM   | UM  |
| AT5G58740 | UM  | UM   | UM   | UM  | UM  | UM  | UM   | UM  |
| AT5G58750 | UM  | UM   | UM   | UM  | UM  | UM  | UM   | UM  |
| AT5G58760 | gbM | gbM  | gbM  | UM  | UM  | UM  | mCHH | gbM |
| AT5G58770 | UM  | UM   | UM   | UM  | UM  | UM  | UM   | UM  |
| AT5G58780 | UM  | UM   | UM   | UM  | UM  | UM  | UM   | UM  |
| AT5G58782 | UM  | UM   | UM   | UM  | UM  | UM  | UM   | UM  |
| AT5G58784 | UM  | UM   | UM   | UM  | UM  | UM  | UM   | UM  |
| AT5G58787 | UM  | UM   | UM   | UM  | UM  | UM  | mCHH | UM  |
| AT5G58790 | UM  | UM   | UM   | UM  | UM  | UM  | UM   | UM  |
| AT5G58800 | UM  | UM   | UM   | UM  | gbM | UM  | UM   | UM  |
| AT5G58820 | UM  | UM   | UM   | UM  | UM  | UM  | mCHH | UM  |
| AT5G58830 | UM  | UM   | UM   | UM  | UM  | UM  | mCHH | UM  |
| AT5G58840 | UM  | UM   | UM   | UM  | UM  | UM  | UM   | UM  |
| AT5G58850 | UM  | UM   | UM   | UM  | UM  | UM  | UM   | UM  |
| AT5G58860 | UM  | UM   | UM   | UM  | UM  | UM  | UM   | UM  |
| AT5G58870 | gbM | gbM  | UM   | UM  | UM  | UM  | gbM  | gbM |
| AT5G58880 | UM  | mCHH | mCHH | UM  | UM  | UM  | mCHH | UM  |
| AT5G58890 | UM  | UM   | UM   | UM  | UM  | UM  | UM   | UM  |
| AT5G58900 | UM  | UM   | UM   | UM  | UM  | UM  | UM   | UM  |













|           |      |      |      |      |      |      |      |      |
|-----------|------|------|------|------|------|------|------|------|
| AT5G61228 | UM   |
| AT5G61230 | UM   | gbM  | gbM  | gbM  | gbM  | gbM  | gbM  | UM   |
| AT5G61240 | UM   |
| AT5G61250 | UM   |
| AT5G61260 | UM   |
| AT5G61270 | UM   |
| AT5G61280 | mCHH | UM   |
| AT5G61290 | UM   |
| AT5G61300 | UM   | gbM  | UM   | UM   | UM   | UM   | UM   | UM   |
| AT5G61310 | UM   |
| AT5G61320 | UM   |
| AT5G61330 | UM   |
| AT5G61340 | UM   |
| AT5G61350 | UM   |
| AT5G61360 | UM   |
| AT5G61370 | UM   |
| AT5G61380 | gbM  | gbM  | gbM  | gbM  | UM   | UM   | mCHH | UM   |
| AT5G61390 | UM   |
| AT5G61400 | UM   |
| AT5G61410 | UM   |
| AT5G61412 | UM   |
| AT5G61420 | UM   |
| AT5G61430 | UM   |
| AT5G61440 | UM   |
| AT5G61450 | UM   | UM   | UM   | UM   | UM   | UM   | mCHH | UM   |
| AT5G61460 | gbM  | mCHH | gbM  | gbM  | gbM  | gbM  | mCHH | gbM  |
| AT5G61470 | mCHH |
| AT5G61480 | UM   |
| AT5G61490 | UM   |
| AT5G61495 | UM   |
| AT5G61500 | UM   |
| AT5G61510 | UM   |
| AT5G61520 | UM   |
| AT5G61530 | gbM  | gbM  | UM   | UM   | gbM  | UM   | gbM  | UM   |
| AT5G61540 | UM   |
| AT5G61550 | UM   |
| AT5G61560 | UM   |
| AT5G61570 | UM   |
| AT5G61580 | UM   |
| AT5G61590 | UM   |
| AT5G61600 | UM   |
| AT5G61605 | UM   |
| AT5G61610 | UM   |
| AT5G61620 | UM   |
| AT5G61630 | UM   |
| AT5G61640 | UM   |
| AT5G61650 | UM   |
| AT5G61660 | UM   |











|           |      |      |     |     |     |     |      |     |
|-----------|------|------|-----|-----|-----|-----|------|-----|
| AT5G63520 | UM   | mCHG | UM  | UM  | UM  | UM  | UM   | UM  |
| AT5G63530 | UM   | UM   | UM  | UM  | UM  | UM  | mCHH | UM  |
| AT5G63540 | UM   | UM   | UM  | UM  | UM  | UM  | UM   | UM  |
| AT5G63550 | UM   | mCHH | UM  | UM  | UM  | UM  | mCHH | UM  |
| AT5G63560 | UM   | UM   | UM  | UM  | UM  | UM  | UM   | UM  |
| AT5G63570 | gbM  | gbM  | gbM | UM  | gbM | UM  | gbM  | gbM |
| AT5G63580 | UM   | UM   | UM  | UM  | UM  | UM  | UM   | UM  |
| AT5G63590 | UM   | UM   | UM  | UM  | UM  | UM  | UM   | UM  |
| AT5G63595 | UM   | UM   | UM  | UM  | UM  | UM  | UM   | UM  |
| AT5G63600 | UM   | UM   | UM  | UM  | UM  | UM  | UM   | UM  |
| AT5G63610 | gbM  | gbM  | gbM | gbM | gbM | gbM | gbM  | gbM |
| AT5G63620 | UM   | UM   | UM  | UM  | UM  | UM  | UM   | UM  |
| AT5G63630 | UM   | UM   | UM  | UM  | UM  | UM  | UM   | UM  |
| AT5G63640 | UM   | UM   | UM  | UM  | UM  | UM  | UM   | UM  |
| AT5G63650 | mCHH | mCHG | UM  | UM  | UM  | UM  | mCHH | UM  |
| AT5G63660 | UM   | UM   | UM  | UM  | UM  | UM  | UM   | UM  |
| AT5G63670 | UM   | UM   | UM  | UM  | UM  | UM  | UM   | UM  |
| AT5G63680 | gbM  | gbM  | gbM | gbM | gbM | gbM | gbM  | gbM |
| AT5G63690 | UM   | UM   | UM  | UM  | UM  | UM  | UM   | UM  |
| AT5G63700 | UM   | UM   | UM  | UM  | UM  | UM  | UM   | UM  |
| AT5G63710 | UM   | UM   | UM  | UM  | UM  | UM  | UM   | UM  |
| AT5G63720 | UM   | UM   | UM  | UM  | UM  | UM  | UM   | UM  |
| AT5G63730 | UM   | UM   | UM  | UM  | UM  | UM  | UM   | UM  |
| AT5G63740 | UM   | UM   | UM  | UM  | UM  | UM  | UM   | UM  |
| AT5G63750 | UM   | UM   | UM  | UM  | UM  | UM  | UM   | UM  |
| AT5G63760 | UM   | UM   | UM  | UM  | UM  | UM  | UM   | UM  |
| AT5G63770 | gbM  | gbM  | gbM | UM  | UM  | UM  | gbM  | UM  |
| AT5G63780 | gbM  | gbM  | gbM | gbM | gbM | gbM | gbM  | gbM |
| AT5G63790 | UM   | UM   | UM  | UM  | UM  | UM  | UM   | UM  |
| AT5G63800 | UM   | UM   | UM  | UM  | UM  | UM  | UM   | UM  |
| AT5G63810 | UM   | UM   | UM  | UM  | UM  | UM  | UM   | UM  |
| AT5G63820 | UM   | UM   | UM  | UM  | UM  | UM  | UM   | UM  |
| AT5G63830 | UM   | UM   | UM  | UM  | UM  | UM  | UM   | UM  |
| AT5G63840 | UM   | UM   | UM  | UM  | UM  | UM  | UM   | UM  |
| AT5G63850 | UM   | UM   | UM  | UM  | UM  | UM  | UM   | UM  |
| AT5G63860 | UM   | UM   | UM  | UM  | UM  | UM  | UM   | UM  |
| AT5G63870 | UM   | UM   | UM  | UM  | UM  | UM  | UM   | UM  |
| AT5G63880 | UM   | UM   | UM  | UM  | UM  | UM  | UM   | UM  |
| AT5G63890 | UM   | UM   | UM  | UM  | UM  | UM  | UM   | UM  |
| AT5G63900 | UM   | UM   | UM  | UM  | UM  | UM  | UM   | UM  |
| AT5G63905 | UM   | UM   | UM  | UM  | UM  | UM  | UM   | UM  |
| AT5G63910 | UM   | UM   | UM  | UM  | UM  | UM  | UM   | UM  |
| AT5G63920 | UM   | UM   | UM  | UM  | UM  | UM  | UM   | UM  |
| AT5G63930 | gbM  | gbM  | gbM | gbM | gbM | gbM | gbM  | gbM |
| AT5G63940 | gbM  | gbM  | gbM | gbM | gbM | gbM | gbM  | gbM |
| AT5G63950 | UM   | mCHH | UM  | UM  | UM  | UM  | mCHH | UM  |
| AT5G63952 | UM   | UM   | UM  | UM  | UM  | UM  | UM   | UM  |
| AT5G63960 | gbM  | gbM  | gbM | gbM | UM  | UM  | gbM  | UM  |

|           |     |      |      |     |     |     |      |     |
|-----------|-----|------|------|-----|-----|-----|------|-----|
| AT5G63970 | UM  | UM   | UM   | UM  | UM  | UM  | mCHH | UM  |
| AT5G63980 | UM  | UM   | UM   | UM  | UM  | UM  | UM   | UM  |
| AT5G63990 | UM  | UM   | UM   | UM  | UM  | UM  | UM   | UM  |
| AT5G64000 | gbM | gbM  | gbM  | gbM | gbM | gbM | gbM  | gbM |
| AT5G64010 | UM  | UM   | UM   | UM  | UM  | UM  | UM   | UM  |
| AT5G64020 | UM  | UM   | UM   | UM  | UM  | UM  | gbM  | UM  |
| AT5G64030 | gbM | mCHH | mCHH | gbM | gbM | gbM | mCHH | gbM |
| AT5G64040 | UM  | UM   | UM   | UM  | UM  | UM  | UM   | UM  |
| AT5G64050 | UM  | UM   | UM   | UM  | UM  | UM  | UM   | UM  |
| AT5G64060 | UM  | UM   | UM   | UM  | UM  | UM  | UM   | UM  |
| AT5G64070 | gbM | mCHH | gbM  | gbM | gbM | gbM | mCHH | gbM |
| AT5G64080 | UM  | UM   | UM   | UM  | UM  | UM  | UM   | UM  |
| AT5G64090 | UM  | UM   | UM   | UM  | UM  | UM  | UM   | UM  |
| AT5G64100 | UM  | UM   | UM   | UM  | UM  | UM  | UM   | UM  |
| AT5G64110 | UM  | UM   | UM   | UM  | UM  | UM  | UM   | UM  |
| AT5G64120 | UM  | UM   | UM   | UM  | UM  | UM  | UM   | UM  |
| AT5G64130 | UM  | UM   | UM   | UM  | UM  | UM  | UM   | UM  |
| AT5G64140 | UM  | UM   | UM   | UM  | UM  | UM  | UM   | UM  |
| AT5G64150 | UM  | UM   | UM   | UM  | UM  | UM  | UM   | UM  |
| AT5G64160 | UM  | UM   | UM   | UM  | UM  | UM  | UM   | UM  |
| AT5G64170 | gbM | gbM  | gbM  | gbM | gbM | gbM | gbM  | gbM |
| AT5G64180 | UM  | UM   | UM   | UM  | UM  | UM  | UM   | UM  |
| AT5G64190 | UM  | UM   | UM   | UM  | UM  | UM  | UM   | UM  |
| AT5G64200 | gbM | gbM  | gbM  | gbM | gbM | gbM | gbM  | gbM |
| AT5G64210 | UM  | UM   | UM   | UM  | UM  | UM  | UM   | UM  |
| AT5G64220 | gbM | gbM  | gbM  | gbM | gbM | gbM | mCHH | gbM |
| AT5G64230 | UM  | UM   | UM   | UM  | UM  | UM  | UM   | UM  |
| AT5G64240 | UM  | UM   | UM   | UM  | UM  | UM  | UM   | UM  |
| AT5G64250 | UM  | UM   | UM   | UM  | UM  | UM  | UM   | UM  |
| AT5G64260 | UM  | UM   | UM   | UM  | UM  | UM  | UM   | UM  |
| AT5G64270 | gbM | gbM  | gbM  | gbM | gbM | gbM | gbM  | gbM |
| AT5G64280 | UM  | UM   | UM   | UM  | UM  | UM  | UM   | UM  |
| AT5G64290 | UM  | UM   | UM   | UM  | UM  | UM  | UM   | UM  |
| AT5G64300 | UM  | UM   | UM   | UM  | UM  | UM  | UM   | UM  |
| AT5G64310 | UM  | UM   | UM   | UM  | UM  | UM  | UM   | UM  |
| AT5G64320 | UM  | UM   | UM   | UM  | UM  | UM  | UM   | UM  |
| AT5G64330 | UM  | UM   | UM   | UM  | UM  | UM  | UM   | UM  |
| AT5G64340 | UM  | UM   | UM   | UM  | UM  | UM  | UM   | UM  |
| AT5G64341 | UM  | UM   | UM   | UM  | UM  | UM  | UM   | UM  |
| AT5G64342 | UM  | UM   | UM   | UM  | UM  | UM  | UM   | UM  |
| AT5G64343 | UM  | UM   | UM   | UM  | UM  | UM  | UM   | UM  |
| AT5G64350 | UM  | UM   | UM   | UM  | UM  | UM  | UM   | UM  |
| AT5G64360 | UM  | UM   | UM   | UM  | UM  | UM  | UM   | UM  |
| AT5G64370 | UM  | UM   | UM   | UM  | UM  | UM  | UM   | UM  |
| AT5G64380 | UM  | UM   | UM   | UM  | UM  | UM  | UM   | UM  |
| AT5G64390 | gbM | gbM  | UM   | UM  | UM  | UM  | gbM  | UM  |
| AT5G64395 | UM  | UM   | UM   | UM  | UM  | UM  | UM   | UM  |
| AT5G64400 | UM  | UM   | UM   | UM  | UM  | UM  | UM   | UM  |



|           |      |      |      |      |      |      |      |      |
|-----------|------|------|------|------|------|------|------|------|
| AT5G64830 | UM   | gbM  | UM   | UM   | UM   | UM   | UM   | UM   |
| AT5G64840 | UM   |
| AT5G64850 | UM   |
| AT5G64860 | UM   | UM   | UM   | UM   | UM   | UM   | mCHH | UM   |
| AT5G64870 | UM   |
| AT5G64880 | UM   | UM   | UM   | UM   | UM   | UM   | mCHH | UM   |
| AT5G64890 | UM   |
| AT5G64900 | UM   |
| AT5G64905 | UM   |
| AT5G64910 | UM   |
| AT5G64920 | UM   |
| AT5G64930 | gbM  | mCHH | gbM  | gbM  | gbM  | UM   | gbM  | gbM  |
| AT5G64940 | UM   | UM   | UM   | UM   | UM   | UM   | mCHH | UM   |
| AT5G64950 | UM   |
| AT5G64960 | gbM  |
| AT5G64970 | UM   |
| AT5G64980 | UM   |
| AT5G64990 | UM   |
| AT5G65000 | UM   |
| AT5G65005 | mCHH |
| AT5G65010 | UM   |
| AT5G65020 | UM   |
| AT5G65030 | UM   |
| AT5G65040 | UM   |
| AT5G65050 | UM   |
| AT5G65060 | UM   |
| AT5G65070 | UM   |
| AT5G65080 | UM   |
| AT5G65090 | UM   |
| AT5G65100 | UM   |
| AT5G65110 | UM   |
| AT5G65120 | UM   |
| AT5G65130 | UM   |
| AT5G65140 | UM   |
| AT5G65158 | UM   |
| AT5G65160 | UM   |
| AT5G65165 | UM   |
| AT5G65166 | UM   |
| AT5G65170 | UM   |
| AT5G65180 | UM   | UM   | UM   | UM   | UM   | UM   | gbM  | UM   |
| AT5G65200 | UM   |
| AT5G65205 | UM   |
| AT5G65207 | UM   |
| AT5G65210 | UM   | UM   | UM   | UM   | UM   | UM   | mCHH | UM   |
| AT5G65220 | UM   |
| AT5G65230 | UM   |
| AT5G65240 | UM   | UM   | UM   | UM   | UM   | UM   | gbM  | UM   |
| AT5G65250 | UM   |



|           |      |      |      |     |     |     |      |     |
|-----------|------|------|------|-----|-----|-----|------|-----|
| AT5G65687 | UM   | UM   | UM   | UM  | UM  | UM  | UM   | UM  |
| AT5G65690 | UM   | UM   | UM   | UM  | UM  | UM  | UM   | UM  |
| AT5G65700 | UM   | UM   | UM   | UM  | UM  | UM  | UM   | UM  |
| AT5G65710 | UM   | mCHH | UM   | UM  | UM  | UM  | UM   | UM  |
| AT5G65720 | UM   | UM   | UM   | UM  | UM  | UM  | UM   | UM  |
| AT5G65730 | UM   | UM   | UM   | UM  | UM  | UM  | UM   | UM  |
| AT5G65740 | UM   | UM   | UM   | UM  | UM  | UM  | UM   | UM  |
| AT5G65750 | gbM  | gbM  | gbM  | gbM | gbM | gbM | mCHH | gbM |
| AT5G65760 | UM   | UM   | UM   | UM  | UM  | UM  | UM   | UM  |
| AT5G65770 | mCHH | mCHH | gbM  | UM  | UM  | UM  | mCHH | UM  |
| AT5G65780 | UM   | UM   | UM   | UM  | UM  | UM  | UM   | UM  |
| AT5G65790 | UM   | UM   | UM   | UM  | UM  | UM  | UM   | UM  |
| AT5G65800 | UM   | UM   | UM   | UM  | UM  | UM  | UM   | UM  |
| AT5G65810 | UM   | UM   | UM   | UM  | UM  | UM  | UM   | UM  |
| AT5G65820 | UM   | UM   | UM   | UM  | UM  | UM  | UM   | UM  |
| AT5G65830 | UM   | UM   | UM   | UM  | UM  | UM  | UM   | UM  |
| AT5G65840 | UM   | UM   | UM   | UM  | UM  | UM  | UM   | UM  |
| AT5G65850 | UM   | UM   | UM   | UM  | UM  | UM  | UM   | UM  |
| AT5G65860 | UM   | UM   | UM   | UM  | UM  | UM  | UM   | UM  |
| AT5G65870 | UM   | UM   | UM   | UM  | UM  | UM  | UM   | UM  |
| AT5G65880 | UM   | UM   | UM   | UM  | UM  | UM  | UM   | UM  |
| AT5G65890 | UM   | UM   | UM   | UM  | UM  | UM  | UM   | UM  |
| AT5G65900 | mCHG | mCHH | mCHG | UM  | UM  | UM  | mCHH | UM  |
| AT5G65910 | UM   | UM   | UM   | UM  | UM  | UM  | UM   | UM  |
| AT5G65920 | UM   | UM   | UM   | UM  | UM  | UM  | UM   | UM  |
| AT5G65925 | UM   | UM   | UM   | UM  | UM  | UM  | UM   | UM  |
| AT5G65930 | UM   | UM   | UM   | UM  | UM  | UM  | mCHH | UM  |
| AT5G65940 | UM   | UM   | UM   | UM  | UM  | UM  | UM   | UM  |
| AT5G65950 | gbM  | mCHH | gbM  | gbM | gbM | gbM | gbM  | UM  |
| AT5G65960 | UM   | UM   | UM   | UM  | UM  | UM  | UM   | UM  |
| AT5G65970 | UM   | UM   | UM   | UM  | UM  | UM  | UM   | UM  |
| AT5G65980 | UM   | UM   | UM   | UM  | UM  | UM  | UM   | UM  |
| AT5G65990 | UM   | UM   | UM   | UM  | UM  | UM  | UM   | UM  |
| AT5G66000 | UM   | UM   | UM   | UM  | UM  | UM  | UM   | UM  |
| AT5G66005 | UM   | UM   | UM   | UM  | UM  | UM  | UM   | UM  |
| AT5G66010 | gbM  | gbM  | gbM  | gbM | gbM | gbM | gbM  | gbM |
| AT5G66020 | UM   | UM   | UM   | UM  | UM  | UM  | UM   | UM  |
| AT5G66030 | gbM  | gbM  | gbM  | gbM | gbM | gbM | mCHH | gbM |
| AT5G66040 | UM   | UM   | UM   | UM  | UM  | UM  | UM   | UM  |
| AT5G66050 | UM   | UM   | UM   | UM  | UM  | UM  | mCHH | UM  |
| AT5G66052 | UM   | UM   | UM   | UM  | UM  | UM  | UM   | UM  |
| AT5G66053 | UM   | UM   | UM   | UM  | UM  | UM  | UM   | UM  |
| AT5G66055 | UM   | UM   | UM   | UM  | UM  | UM  | UM   | UM  |
| AT5G66060 | UM   | UM   | UM   | UM  | UM  | UM  | UM   | UM  |
| AT5G66070 | UM   | UM   | UM   | UM  | UM  | UM  | UM   | UM  |
| AT5G66080 | UM   | UM   | UM   | UM  | UM  | UM  | UM   | UM  |
| AT5G66090 | UM   | UM   | UM   | UM  | UM  | UM  | mCHH | UM  |
| AT5G66100 | UM   | UM   | UM   | UM  | UM  | UM  | UM   | UM  |





|           |      |      |     |     |     |     |      |     |
|-----------|------|------|-----|-----|-----|-----|------|-----|
| AT5G66580 | UM   | UM   | UM  | UM  | UM  | UM  | UM   | UM  |
| AT5G66590 | UM   | UM   | UM  | UM  | UM  | UM  | UM   | UM  |
| AT5G66600 | gbM  | gbM  | UM  | UM  | gbM | UM  | UM   | UM  |
| AT5G66607 | UM   | UM   | UM  | UM  | UM  | UM  | UM   | UM  |
| AT5G66610 | UM   | UM   | UM  | UM  | UM  | UM  | UM   | UM  |
| AT5G66620 | UM   | UM   | UM  | UM  | UM  | UM  | UM   | UM  |
| AT5G66630 | UM   | UM   | UM  | UM  | UM  | UM  | UM   | UM  |
| AT5G66631 | UM   | UM   | UM  | UM  | UM  | UM  | UM   | UM  |
| AT5G66640 | UM   | mCHH | UM  | UM  | UM  | UM  | UM   | UM  |
| AT5G66650 | UM   | UM   | UM  | UM  | UM  | UM  | UM   | UM  |
| AT5G66658 | UM   | UM   | UM  | UM  | UM  | UM  | UM   | UM  |
| AT5G66660 | UM   | UM   | UM  | UM  | UM  | UM  | UM   | UM  |
| AT5G66670 | UM   | UM   | UM  | UM  | UM  | UM  | UM   | UM  |
| AT5G66675 | UM   | UM   | UM  | UM  | UM  | UM  | UM   | UM  |
| AT5G66680 | UM   | UM   | UM  | UM  | UM  | UM  | UM   | UM  |
| AT5G66690 | UM   | UM   | UM  | UM  | UM  | UM  | UM   | UM  |
| AT5G66700 | UM   | UM   | UM  | UM  | UM  | UM  | UM   | UM  |
| AT5G66710 | UM   | UM   | UM  | UM  | UM  | UM  | UM   | UM  |
| AT5G66720 | UM   | UM   | UM  | gbM | UM  | UM  | UM   | UM  |
| AT5G66730 | UM   | UM   | UM  | UM  | UM  | UM  | UM   | UM  |
| AT5G66740 | UM   | UM   | UM  | UM  | UM  | UM  | UM   | UM  |
| AT5G66750 | UM   | UM   | UM  | UM  | UM  | UM  | UM   | UM  |
| AT5G66760 | UM   | UM   | UM  | UM  | UM  | UM  | mCHH | UM  |
| AT5G66770 | UM   | UM   | UM  | UM  | UM  | UM  | UM   | UM  |
| AT5G66780 | UM   | UM   | UM  | UM  | UM  | UM  | UM   | UM  |
| AT5G66790 | UM   | UM   | UM  | UM  | UM  | UM  | mCHH | UM  |
| AT5G66800 | UM   | UM   | UM  | UM  | UM  | UM  | UM   | UM  |
| AT5G66810 | UM   | UM   | UM  | UM  | UM  | UM  | mCHH | UM  |
| AT5G66815 | mCHH | UM   | UM  | UM  | UM  | UM  | mCHH | UM  |
| AT5G66816 | UM   | UM   | UM  | UM  | UM  | UM  | UM   | UM  |
| AT5G66820 | UM   | UM   | UM  | UM  | UM  | UM  | UM   | UM  |
| AT5G66830 | UM   | UM   | UM  | UM  | UM  | UM  | UM   | UM  |
| AT5G66840 | UM   | UM   | UM  | UM  | UM  | UM  | UM   | UM  |
| AT5G66850 | UM   | UM   | UM  | UM  | UM  | UM  | UM   | UM  |
| AT5G66860 | UM   | UM   | UM  | UM  | UM  | UM  | UM   | UM  |
| AT5G66870 | UM   | UM   | UM  | UM  | UM  | UM  | UM   | UM  |
| AT5G66880 | UM   | UM   | UM  | UM  | UM  | UM  | UM   | UM  |
| AT5G66890 | UM   | UM   | UM  | UM  | UM  | UM  | UM   | UM  |
| AT5G66900 | UM   | UM   | UM  | UM  | UM  | UM  | mCHH | UM  |
| AT5G66910 | UM   | UM   | UM  | UM  | UM  | UM  | UM   | UM  |
| AT5G66920 | UM   | UM   | UM  | UM  | UM  | UM  | UM   | UM  |
| AT5G66930 | UM   | UM   | UM  | UM  | UM  | UM  | UM   | UM  |
| AT5G66940 | UM   | UM   | UM  | UM  | UM  | UM  | UM   | UM  |
| AT5G66950 | gbM  | gbM  | gbM | gbM | gbM | gbM | mCHH | gbM |
| AT5G66960 | UM   | UM   | UM  | UM  | UM  | UM  | UM   | UM  |
| AT5G66970 | UM   | UM   | UM  | UM  | UM  | UM  | UM   | UM  |
| AT5G66980 | UM   | UM   | UM  | UM  | UM  | UM  | UM   | UM  |
| AT5G66985 | UM   | UM   | UM  | UM  | UM  | UM  | UM   | UM  |

|           |      |      |      |     |      |      |      |     |
|-----------|------|------|------|-----|------|------|------|-----|
| AT5G66990 | UM   | UM   | UM   | UM  | UM   | UM   | UM   | UM  |
| AT5G67000 | UM   | UM   | UM   | UM  | UM   | UM   | UM   | UM  |
| AT5G67010 | UM   | UM   | UM   | UM  | UM   | UM   | UM   | UM  |
| AT5G67020 | UM   | UM   | UM   | UM  | UM   | UM   | UM   | UM  |
| AT5G67030 | UM   | UM   | UM   | UM  | UM   | UM   | UM   | UM  |
| AT5G67040 | UM   | UM   | UM   | UM  | UM   | UM   | UM   | UM  |
| AT5G67050 | UM   | UM   | UM   | UM  | UM   | UM   | UM   | UM  |
| AT5G67060 | UM   | UM   | UM   | UM  | UM   | UM   | UM   | UM  |
| AT5G67070 | UM   | UM   | UM   | UM  | UM   | UM   | UM   | UM  |
| AT5G67080 | UM   | UM   | UM   | UM  | UM   | UM   | UM   | UM  |
| AT5G67090 | UM   | UM   | UM   | UM  | UM   | UM   | mCHH | UM  |
| AT5G67100 | UM   | mCHH | UM   | UM  | UM   | UM   | mCHH | UM  |
| AT5G67110 | UM   | UM   | UM   | UM  | UM   | UM   | UM   | UM  |
| AT5G67120 | mCHH | mCHH | mCHH | UM  | mCHG | mCHG | mCHH | UM  |
| AT5G67130 | UM   | UM   | UM   | UM  | UM   | UM   | UM   | UM  |
| AT5G67140 | UM   | UM   | UM   | UM  | UM   | UM   | UM   | UM  |
| AT5G67150 | UM   | UM   | UM   | UM  | UM   | UM   | UM   | UM  |
| AT5G67160 | UM   | UM   | UM   | UM  | UM   | UM   | UM   | UM  |
| AT5G67170 | UM   | mCHH | UM   | UM  | UM   | UM   | UM   | UM  |
| AT5G67180 | UM   | UM   | UM   | UM  | UM   | UM   | UM   | UM  |
| AT5G67190 | UM   | UM   | UM   | UM  | UM   | UM   | UM   | UM  |
| AT5G67200 | UM   | UM   | UM   | UM  | UM   | UM   | UM   | UM  |
| AT5G67210 | UM   | UM   | UM   | UM  | UM   | UM   | UM   | UM  |
| AT5G67220 | UM   | UM   | UM   | UM  | UM   | UM   | UM   | UM  |
| AT5G67230 | UM   | UM   | UM   | UM  | UM   | UM   | UM   | UM  |
| AT5G67240 | UM   | UM   | gbM  | UM  | UM   | UM   | gbM  | UM  |
| AT5G67245 | UM   | UM   | UM   | UM  | UM   | UM   | UM   | UM  |
| AT5G67250 | UM   | UM   | UM   | UM  | UM   | UM   | UM   | UM  |
| AT5G67260 | UM   | UM   | UM   | UM  | UM   | UM   | UM   | UM  |
| AT5G67265 | UM   | UM   | UM   | UM  | UM   | UM   | UM   | UM  |
| AT5G67270 | UM   | UM   | UM   | UM  | UM   | UM   | UM   | UM  |
| AT5G67280 | UM   | UM   | UM   | UM  | UM   | UM   | UM   | UM  |
| AT5G67290 | UM   | UM   | UM   | UM  | UM   | UM   | UM   | UM  |
| AT5G67300 | UM   | UM   | UM   | UM  | UM   | UM   | UM   | UM  |
| AT5G67310 | UM   | UM   | UM   | UM  | UM   | UM   | UM   | UM  |
| AT5G67320 | mCHH | mCHH | UM   | UM  | UM   | UM   | mCHH | UM  |
| AT5G67330 | UM   | UM   | UM   | UM  | UM   | UM   | UM   | UM  |
| AT5G67340 | UM   | UM   | UM   | UM  | UM   | UM   | UM   | UM  |
| AT5G67350 | UM   | UM   | UM   | UM  | UM   | UM   | UM   | UM  |
| AT5G67360 | UM   | UM   | UM   | UM  | UM   | UM   | UM   | UM  |
| AT5G67370 | UM   | UM   | UM   | UM  | UM   | UM   | UM   | UM  |
| AT5G67380 | UM   | UM   | UM   | UM  | UM   | UM   | UM   | UM  |
| AT5G67385 | gbM  | gbM  | gbM  | gbM | gbM  | gbM  | gbM  | gbM |
| AT5G67390 | UM   | UM   | UM   | UM  | UM   | UM   | UM   | UM  |
| AT5G67400 | UM   | UM   | UM   | UM  | UM   | UM   | UM   | UM  |
| AT5G67410 | UM   | UM   | UM   | UM  | UM   | UM   | UM   | UM  |
| AT5G67411 | UM   | UM   | UM   | UM  | UM   | UM   | UM   | UM  |
| AT5G67420 | UM   | UM   | UM   | UM  | UM   | UM   | UM   | UM  |

|           |        |         |        |         |         |         |         |         |
|-----------|--------|---------|--------|---------|---------|---------|---------|---------|
| AT5G67430 | UM     | UM      | UM     | UM      | UM      | UM      | UM      | UM      |
| AT5G67440 | UM     | UM      | UM     | UM      | UM      | UM      | UM      | UM      |
| AT5G67450 | UM     | UM      | UM     | UM      | UM      | UM      | UM      | UM      |
| AT5G67460 | UM     | UM      | UM     | UM      | UM      | UM      | UM      | UM      |
| AT5G67470 | UM     | UM      | UM     | UM      | UM      | UM      | UM      | UM      |
| AT5G67480 | UM     | UM      | UM     | UM      | UM      | UM      | UM      | UM      |
| AT5G67490 | UM     | UM      | UM     | UM      | UM      | UM      | UM      | UM      |
| AT5G67500 | UM     | UM      | UM     | UM      | UM      | UM      | UM      | UM      |
| AT5G67510 | UM     | UM      | UM     | UM      | UM      | UM      | UM      | UM      |
| AT5G67520 | UM     | UM      | UM     | UM      | UM      | UM      | UM      | UM      |
| AT5G67530 | gbM    | gbM     | gbM    | UM      | gbM     | gbM     | gbM     | gbM     |
| AT5G67540 | gbM    | gbM     | gbM    | gbM     | gbM     | gbM     | gbM     | gbM     |
| AT5G67550 | UM     | UM      | UM     | UM      | UM      | UM      | UM      | UM      |
| AT5G67560 | UM     | UM      | UM     | UM      | UM      | UM      | UM      | UM      |
| AT5G67570 | UM     | UM      | UM     | UM      | UM      | UM      | mCHH    | UM      |
| AT5G67580 | UM     | UM      | UM     | UM      | UM      | UM      | UM      | UM      |
| AT5G67590 | UM     | UM      | UM     | UM      | UM      | UM      | UM      | UM      |
| AT5G67600 | UM     | UM      | UM     | UM      | UM      | UM      | UM      | UM      |
| AT5G67610 | UM     | mCHH    | UM     | UM      | UM      | UM      | mCHH    | UM      |
| AT5G67620 | UM     | UM      | UM     | UM      | UM      | UM      | UM      | UM      |
| AT5G67630 | UM     | UM      | UM     | UM      | UM      | UM      | UM      | UM      |
| AT5G67640 | UM     | UM      | UM     | UM      | UM      | UM      | UM      | UM      |
| AT1G53885 | unknow | UM      | unknow | unknown | unknown | unknown | UM      | unknown |
| AT2G07684 | unknow | UM      | unknow | unknown | unknown | unknown | UM      | unknown |
| AT2G07691 | unknow | UM      | UM     | unknown | unknown | unknown | unknown | unknown |
| AT2G07820 | unknow | UM      | unknow | unknown | unknown | unknown | UM      | unknown |
| AT5G36770 | unknow | UM      | UM     | unknown | unknown | unknown | UM      | unknown |
| AT5G50620 | unknow | UM      | UM     | unknown | unknown | unknown | UM      | unknown |
| AT1G59359 | unknow | unknown | UM     | unknown | unknown | UM      | unknown | unknown |
| AT4G34881 | unknow | unknown | UM     | UM      | UM      | UM      | UM      | unknown |
| AT2G07696 | unknow | unknown | unknow | unknown | unknown | unknown | UM      | unknown |
| AT5G50565 | unknow | unknown | unknow | unknown | unknown | unknown | UM      | unknown |

Table S10. Genes used in network analysis. Various transcription factors and target genes are listed together with the relationship of their expression using only those genes that are significantly changed in the differential expression analyses in a particular trisomic or ploidy relative to the diploid. If the target is positively correlated with the transcription factor expression, the interaction is listed as “activation”. If the target gene expression is negatively correlated with the transcription factor expression, the interaction is listed as “repression”. The types of interactions in the reference network, AtRegNet, are also shown.

| TF(Trisomy1) | Target gene | Relation (AtRegNet) | Ratio(TF) | Ratio(target) | Relation (Data) |
|--------------|-------------|---------------------|-----------|---------------|-----------------|
| AT1G32770    | AT2G14620   | RefActivation       | 0.00      | >=6           | DataRepression  |
| AT1G32770    | AT1G16420   | RefActivation       | 0.00      | >=6           | DataRepression  |
| AT2G25000    | AT2G19190   | RefActivation       | 4.86      | >=6           | DataActivation  |
| AT2G43010    | AT1G14880   | RefActivation       | 0.47      | >=6           | DataRepression  |
| AT2G43010    | AT1G62760   | RefActivation       | 0.47      | >=6           | DataRepression  |
| AT2G43010    | AT1G68620   | RefActivation       | 0.47      | >=6           | DataRepression  |
| AT2G43010    | AT1G69600   | RefActivation       | 0.47      | >=6           | DataRepression  |
| AT2G43010    | AT1G72490   | RefActivation       | 0.47      | >=6           | DataRepression  |
| AT2G43010    | AT1G73000   | RefActivation       | 0.47      | >=6           | DataRepression  |
| AT2G43010    | AT1G78290   | RefActivation       | 0.47      | >=6           | DataRepression  |
| AT2G43010    | AT2G43140   | RefActivation       | 0.47      | >=6           | DataRepression  |
| AT2G43010    | AT2G46830   | RefActivation       | 0.47      | >=6           | DataRepression  |
| AT2G43010    | AT3G01513   | RefActivation       | 0.47      | >=6           | DataRepression  |
| AT2G43010    | AT3G10320   | RefActivation       | 0.47      | >=6           | DataRepression  |
| AT2G43010    | AT3G12320   | RefActivation       | 0.47      | >=6           | DataRepression  |
| AT2G43010    | AT3G22840   | RefActivation       | 0.47      | >=6           | DataRepression  |
| AT2G43010    | AT3G27170   | RefActivation       | 0.47      | >=6           | DataRepression  |
| AT2G43010    | AT3G44300   | RefActivation       | 0.47      | >=6           | DataRepression  |
| AT2G43010    | AT3G48520   | RefActivation       | 0.47      | >=6           | DataRepression  |
| AT2G43010    | AT3G54510   | RefActivation       | 0.47      | >=6           | DataRepression  |
| AT2G43010    | AT3G56290   | RefActivation       | 0.47      | >=6           | DataRepression  |
| AT2G43010    | AT3G56350   | RefActivation       | 0.47      | >=6           | DataRepression  |
| AT2G43010    | AT3G59930   | RefActivation       | 0.47      | >=6           | DataRepression  |
| AT2G43010    | AT3G61930   | RefActivation       | 0.47      | >=6           | DataRepression  |
| AT2G43010    | AT4G16260   | RefActivation       | 0.47      | >=6           | DataRepression  |
| AT2G43010    | AT4G31380   | RefActivation       | 0.47      | >=6           | DataRepression  |
| AT2G43010    | AT5G04190   | RefActivation       | 0.47      | >=6           | DataRepression  |
| AT2G43010    | AT5G06980   | RefActivation       | 0.47      | >=6           | DataRepression  |
| AT2G43010    | AT5G07010   | RefActivation       | 0.47      | >=6           | DataRepression  |
| AT2G43010    | AT5G44460   | RefActivation       | 0.47      | >=6           | DataRepression  |
| AT2G43010    | AT5G45380   | RefActivation       | 0.47      | >=6           | DataRepression  |
| AT2G43010    | AT5G47740   | RefActivation       | 0.47      | >=6           | DataRepression  |
| AT2G43010    | AT5G66690   | RefActivation       | 0.47      | >=6           | DataRepression  |
| AT2G43010    | AT5G67310   | RefActivation       | 0.47      | >=6           | DataRepression  |
| AT3G24520    | AT2G47180   | RefActivation       | 0.28      | >=6           | DataRepression  |
| AT4G18960    | AT2G27550   | RefActivation       | 0.02      | >=6           | DataRepression  |
| AT5G11260    | AT5G01550   | RefActivation       | 4.11      | >=6           | DataActivation  |
| AT5G11260    | AT3G48520   | RefActivation       | 4.11      | >=6           | DataActivation  |
| AT5G11260    | AT1G09480   | RefActivation       | 4.11      | >=6           | DataActivation  |
| AT5G11260    | AT1G68620   | RefActivation       | 4.11      | >=6           | DataActivation  |
| AT2G43010    | AT1G35230   | RefActivation       | 0.47      | 5.94          | DataRepression  |
| AT2G43010    | AT3G47420   | RefActivation       | 0.47      | 5.90          | DataRepression  |
| AT4G23810    | AT4G35090   | RefActivation       | 0.10      | 5.53          | DataRepression  |
| AT2G43010    | AT2G21510   | RefActivation       | 0.47      | 5.46          | DataRepression  |
| AT2G43010    | AT5G15860   | RefActivation       | 0.47      | 5.42          | DataRepression  |
| AT2G43010    | AT2G28056   | RefActivation       | 0.47      | 5.42          | DataRepression  |
| AT4G18960    | AT1G73830   | RefActivation       | 0.02      | 5.41          | DataRepression  |
| AT5G11260    | AT4G31870   | RefActivation       | 4.11      | 5.14          | DataActivation  |
| AT2G43010    | AT3G54500   | RefActivation       | 0.47      | 5.13          | DataRepression  |
| AT2G43010    | AT1G06570   | RefActivation       | 0.47      | 4.85          | DataRepression  |
| AT2G43010    | AT1G21050   | RefActivation       | 0.47      | 4.79          | DataRepression  |

|           |           |               |      |      |                |
|-----------|-----------|---------------|------|------|----------------|
| AT2G43010 | AT1G62370 | RefActivation | 0.47 | 4.71 | DataRepression |
| AT2G43010 | AT1G10070 | RefActivation | 0.47 | 4.69 | DataRepression |
| AT2G43010 | AT2G30140 | RefActivation | 0.47 | 4.66 | DataRepression |
| AT2G43010 | AT5G25820 | RefActivation | 0.47 | 4.62 | DataRepression |
| AT2G43010 | AT2G45210 | RefActivation | 0.47 | 4.54 | DataRepression |
| AT5G15840 | AT1G62960 | RefActivation | 0.16 | 4.36 | DataRepression |
| AT2G43010 | AT1G02230 | RefActivation | 0.47 | 4.18 | DataRepression |
| AT2G43010 | AT5G11260 | RefActivation | 0.47 | 4.11 | DataRepression |
| AT2G43010 | AT1G69160 | RefActivation | 0.47 | 3.94 | DataRepression |
| AT2G43010 | AT2G46790 | RefActivation | 0.47 | 3.94 | DataRepression |
| AT2G43010 | AT5G53970 | RefActivation | 0.47 | 3.78 | DataRepression |
| AT2G43010 | AT4G27450 | RefActivation | 0.47 | 3.70 | DataRepression |
| AT2G43010 | AT2G46680 | RefActivation | 0.47 | 3.64 | DataRepression |
| AT2G43010 | AT1G16300 | RefActivation | 0.47 | 3.62 | DataRepression |
| AT2G43010 | AT1G69570 | RefActivation | 0.47 | 3.48 | DataRepression |
| AT2G43010 | AT1G15100 | RefActivation | 0.47 | 3.41 | DataRepression |
| AT2G43010 | AT1G75490 | RefActivation | 0.47 | 3.39 | DataRepression |
| AT2G43010 | AT3G15500 | RefActivation | 0.47 | 3.38 | DataRepression |
| AT2G43010 | AT1G09420 | RefActivation | 0.47 | 3.37 | DataRepression |
| AT2G43010 | AT1G23040 | RefActivation | 0.47 | 3.35 | DataRepression |
| AT2G43010 | AT1G05710 | RefActivation | 0.47 | 3.16 | DataRepression |
| AT2G43010 | AT1G63840 | RefActivation | 0.47 | 3.10 | DataRepression |
| AT2G43010 | AT1G67920 | RefActivation | 0.47 | 3.02 | DataRepression |
| AT2G43010 | AT1G52890 | RefActivation | 0.47 | 2.98 | DataRepression |
| AT5G08520 | AT1G52890 | RefActivation | 0.38 | 2.98 | DataRepression |
| AT2G43010 | AT2G23150 | RefActivation | 0.47 | 2.95 | DataRepression |
| AT2G43010 | AT3G12920 | RefActivation | 0.47 | 2.95 | DataRepression |
| AT2G43010 | AT2G39210 | RefActivation | 0.47 | 2.91 | DataRepression |
| AT2G43010 | AT3G47220 | RefActivation | 0.47 | 2.83 | DataRepression |
| AT5G04340 | AT3G24170 | RefActivation | 0.25 | 2.77 | DataRepression |
| AT2G43010 | AT1G19450 | RefActivation | 0.47 | 2.75 | DataRepression |
| AT1G74930 | AT1G74710 | RefActivation | 0.21 | 2.71 | DataRepression |
| AT2G43010 | AT4G06744 | RefActivation | 0.47 | 2.70 | DataRepression |
| AT2G43010 | AT1G21400 | RefActivation | 0.47 | 2.65 | DataRepression |
| AT2G43010 | AT4G29520 | RefActivation | 0.47 | 2.64 | DataRepression |
| AT2G43010 | AT1G62380 | RefActivation | 0.47 | 2.52 | DataRepression |
| AT2G43010 | AT1G10140 | RefActivation | 0.47 | 2.45 | DataRepression |
| AT2G43010 | AT2G37180 | RefActivation | 0.47 | 2.40 | DataRepression |
| AT2G43010 | AT4G27310 | RefActivation | 0.47 | 2.31 | DataRepression |
| AT5G11260 | AT4G27310 | RefActivation | 4.11 | 2.31 | DataActivation |
| AT2G43010 | AT3G61430 | RefActivation | 0.47 | 2.29 | DataRepression |
| AT4G18960 | AT4G32980 | RefActivation | 0.02 | 2.21 | DataRepression |
| AT5G11260 | AT1G57770 | RefActivation | 4.11 | 2.19 | DataActivation |
| AT1G32770 | AT5G34940 | RefActivation | 0.00 | 2.10 | DataRepression |
| AT2G43010 | AT3G54960 | RefActivation | 0.47 | 2.08 | DataRepression |
| AT2G43010 | AT2G17730 | RefActivation | 0.47 | 2.06 | DataRepression |
| AT2G43010 | AT1G73480 | RefActivation | 0.47 | 2.05 | DataRepression |
| AT2G43010 | AT1G78230 | RefActivation | 0.47 | 1.99 | DataRepression |
| AT5G11260 | AT1G22750 | RefActivation | 4.11 | 1.87 | DataActivation |
| AT2G43010 | AT1G34630 | RefActivation | 0.47 | 1.73 | DataRepression |
| AT2G43010 | AT2G40280 | RefActivation | 0.47 | 0.62 | DataActivation |
| AT2G43010 | AT5G55960 | RefActivation | 0.47 | 0.59 | DataActivation |

|           |           |               |      |      |                |
|-----------|-----------|---------------|------|------|----------------|
| AT1G32770 | AT5G59290 | RefActivation | 0.00 | 0.57 | DataActivation |
| AT2G43010 | AT1G16858 | RefActivation | 0.47 | 0.57 | DataActivation |
| AT2G43010 | AT3G45780 | RefActivation | 0.47 | 0.56 | DataActivation |
| AT2G43010 | AT2G41740 | RefActivation | 0.47 | 0.56 | DataActivation |
| AT2G43010 | AT5G65810 | RefActivation | 0.47 | 0.55 | DataActivation |
| AT2G43010 | AT2G41630 | RefActivation | 0.47 | 0.55 | DataActivation |
| AT2G43010 | AT2G20370 | RefActivation | 0.47 | 0.55 | DataActivation |
| AT2G43010 | AT1G72150 | RefActivation | 0.47 | 0.54 | DataActivation |
| AT2G43010 | AT3G19590 | RefActivation | 0.47 | 0.54 | DataActivation |
| AT2G43010 | AT3G15640 | RefActivation | 0.47 | 0.53 | DataActivation |
| AT2G43010 | AT5G66590 | RefActivation | 0.47 | 0.53 | DataActivation |
| AT2G43010 | AT4G25280 | RefActivation | 0.47 | 0.52 | DataActivation |
| AT2G43010 | AT3G49360 | RefActivation | 0.47 | 0.52 | DataActivation |
| AT2G43010 | AT5G03050 | RefActivation | 0.47 | 0.51 | DataActivation |
| AT2G43010 | AT4G25020 | RefActivation | 0.47 | 0.51 | DataActivation |
| AT2G43010 | AT5G11970 | RefActivation | 0.47 | 0.50 | DataActivation |
| AT2G43010 | AT2G30230 | RefActivation | 0.47 | 0.50 | DataActivation |
| AT2G43010 | AT2G32430 | RefActivation | 0.47 | 0.49 | DataActivation |
| AT2G43010 | AT3G06780 | RefActivation | 0.47 | 0.49 | DataActivation |
| AT2G43010 | AT5G16590 | RefActivation | 0.47 | 0.49 | DataActivation |
| AT2G43010 | AT1G17840 | RefActivation | 0.47 | 0.49 | DataActivation |
| AT2G43010 | AT4G09890 | RefActivation | 0.47 | 0.49 | DataActivation |
| AT2G43010 | AT5G45350 | RefActivation | 0.47 | 0.49 | DataActivation |
| AT2G43010 | AT3G16800 | RefActivation | 0.47 | 0.48 | DataActivation |
| AT2G43010 | AT2G37930 | RefActivation | 0.47 | 0.48 | DataActivation |
| AT1G32770 | AT4G12910 | RefActivation | 0.00 | 0.48 | DataActivation |
| AT4G01250 | AT4G24040 | RefActivation | 0.13 | 0.48 | DataActivation |
| AT2G43010 | AT2G22900 | RefActivation | 0.47 | 0.47 | DataActivation |
| AT2G43010 | AT2G39700 | RefActivation | 0.47 | 0.46 | DataActivation |
| AT2G43010 | AT4G35500 | RefActivation | 0.47 | 0.46 | DataActivation |
| AT2G43010 | AT3G14360 | RefActivation | 0.47 | 0.46 | DataActivation |
| AT2G43010 | AT1G67050 | RefActivation | 0.47 | 0.46 | DataActivation |
| AT2G43010 | AT1G14350 | RefActivation | 0.47 | 0.45 | DataActivation |
| AT2G43010 | AT5G50890 | RefActivation | 0.47 | 0.45 | DataActivation |
| AT2G43010 | AT3G17100 | RefActivation | 0.47 | 0.45 | DataActivation |
| AT2G43010 | AT5G22740 | RefActivation | 0.47 | 0.45 | DataActivation |
| AT2G43010 | AT1G04540 | RefActivation | 0.47 | 0.45 | DataActivation |
| AT2G43010 | AT2G40970 | RefActivation | 0.47 | 0.45 | DataActivation |
| AT2G43010 | AT5G59010 | RefActivation | 0.47 | 0.45 | DataActivation |
| AT2G43010 | AT5G23860 | RefActivation | 0.47 | 0.45 | DataActivation |
| AT2G43010 | AT3G15020 | RefActivation | 0.47 | 0.44 | DataActivation |
| AT5G11260 | AT5G45110 | RefActivation | 4.11 | 0.44 | DataRepression |
| AT2G43010 | AT5G12250 | RefActivation | 0.47 | 0.44 | DataActivation |
| AT1G09530 | AT5G47370 | RefActivation | 1.77 | 0.44 | DataRepression |
| AT2G43010 | AT5G47370 | RefActivation | 0.47 | 0.44 | DataActivation |
| AT2G43010 | AT1G69690 | RefActivation | 0.47 | 0.43 | DataActivation |
| AT2G43010 | AT4G16745 | RefActivation | 0.47 | 0.43 | DataActivation |
| AT2G43010 | AT3G23030 | RefActivation | 0.47 | 0.43 | DataActivation |
| AT2G43010 | AT4G39840 | RefActivation | 0.47 | 0.43 | DataActivation |
| AT2G43010 | AT2G41750 | RefActivation | 0.47 | 0.42 | DataActivation |
| AT2G43010 | AT5G11000 | RefActivation | 0.47 | 0.42 | DataActivation |
| AT2G43010 | AT1G13260 | RefActivation | 0.47 | 0.42 | DataActivation |



|           |           |               |      |      |                |
|-----------|-----------|---------------|------|------|----------------|
| AT5G04340 | AT5G27380 | RefActivation | 0.25 | 0.42 | DataActivation |
| AT2G43010 | AT1G20620 | RefActivation | 0.47 | 0.41 | DataActivation |
| AT4G23810 | AT1G20620 | RefActivation | 0.10 | 0.41 | DataActivation |
| AT2G43010 | AT3G61820 | RefActivation | 0.47 | 0.41 | DataActivation |
| AT2G43010 | AT3G01750 | RefActivation | 0.47 | 0.41 | DataActivation |
| AT2G43010 | AT2G19810 | RefActivation | 0.47 | 0.41 | DataActivation |
| AT2G43010 | AT2G44490 | RefActivation | 0.47 | 0.41 | DataActivation |
| AT2G43010 | AT2G41110 | RefActivation | 0.47 | 0.41 | DataActivation |
| AT2G43010 | AT5G27220 | RefActivation | 0.47 | 0.40 | DataActivation |
| AT2G43010 | AT1G72240 | RefActivation | 0.47 | 0.40 | DataActivation |
| AT2G43010 | AT4G14550 | RefActivation | 0.47 | 0.39 | DataActivation |
| AT2G43010 | AT2G47500 | RefActivation | 0.47 | 0.39 | DataActivation |
| AT2G43010 | AT3G44610 | RefActivation | 0.47 | 0.39 | DataActivation |
| AT2G43010 | AT5G65140 | RefActivation | 0.47 | 0.39 | DataActivation |
| AT2G43010 | AT4G02100 | RefActivation | 0.47 | 0.39 | DataActivation |
| AT2G43010 | AT1G64640 | RefActivation | 0.47 | 0.38 | DataActivation |
| AT2G43010 | AT3G50340 | RefActivation | 0.47 | 0.38 | DataActivation |
| AT2G43010 | AT2G38400 | RefActivation | 0.47 | 0.38 | DataActivation |
| AT2G43010 | AT3G29360 | RefActivation | 0.47 | 0.38 | DataActivation |
| AT2G43010 | AT3G50890 | RefActivation | 0.47 | 0.37 | DataActivation |
| AT2G43010 | AT2G35880 | RefActivation | 0.47 | 0.37 | DataActivation |
| AT2G43010 | AT5G15160 | RefActivation | 0.47 | 0.36 | DataActivation |
| AT2G43010 | AT5G05180 | RefActivation | 0.47 | 0.36 | DataActivation |
| AT2G43010 | AT2G46780 | RefActivation | 0.47 | 0.36 | DataActivation |
| AT2G43010 | AT5G60860 | RefActivation | 0.47 | 0.36 | DataActivation |
| AT2G43010 | AT5G04470 | RefActivation | 0.47 | 0.36 | DataActivation |
| AT2G43010 | AT5G37010 | RefActivation | 0.47 | 0.35 | DataActivation |
| AT5G11260 | AT5G01730 | RefActivation | 4.11 | 0.35 | DataRepression |
| AT2G43010 | AT3G09730 | RefActivation | 0.47 | 0.35 | DataActivation |
| AT2G43010 | AT3G50660 | RefActivation | 0.47 | 0.35 | DataActivation |
| AT2G43010 | AT3G02170 | RefActivation | 0.47 | 0.35 | DataActivation |
| AT2G43010 | AT1G32090 | RefActivation | 0.47 | 0.34 | DataActivation |
| AT2G43010 | AT5G18690 | RefActivation | 0.47 | 0.34 | DataActivation |
| AT2G43010 | AT2G20680 | RefActivation | 0.47 | 0.34 | DataActivation |
| AT2G43010 | AT4G27260 | RefActivation | 0.47 | 0.34 | DataActivation |
| AT2G43010 | AT3G54030 | RefActivation | 0.47 | 0.34 | DataActivation |
| AT2G43010 | AT1G05490 | RefActivation | 0.47 | 0.34 | DataActivation |
| AT2G43010 | AT3G60530 | RefActivation | 0.47 | 0.34 | DataActivation |
| AT2G43010 | AT4G01335 | RefActivation | 0.47 | 0.33 | DataActivation |
| AT5G04340 | AT5G44070 | RefActivation | 0.25 | 0.33 | DataActivation |
| AT2G43010 | AT1G29980 | RefActivation | 0.47 | 0.33 | DataActivation |
| AT2G43010 | AT3G57540 | RefActivation | 0.47 | 0.33 | DataActivation |
| AT2G43010 | AT5G03120 | RefActivation | 0.47 | 0.33 | DataActivation |
| AT2G43010 | AT4G16500 | RefActivation | 0.47 | 0.32 | DataActivation |
| AT2G43010 | AT4G09030 | RefActivation | 0.47 | 0.32 | DataActivation |
| AT2G43010 | AT3G55840 | RefActivation | 0.47 | 0.32 | DataActivation |
| AT2G43010 | AT3G61680 | RefActivation | 0.47 | 0.32 | DataActivation |
| AT5G11260 | AT3G61680 | RefActivation | 4.11 | 0.32 | DataRepression |
| AT5G11260 | AT2G33580 | RefActivation | 4.11 | 0.32 | DataRepression |
| AT2G43010 | AT2G14890 | RefActivation | 0.47 | 0.32 | DataActivation |
| AT2G43010 | AT2G37940 | RefActivation | 0.47 | 0.31 | DataActivation |
| AT4G23810 | AT4G39410 | RefActivation | 0.10 | 0.31 | DataActivation |

|           |           |               |      |      |                |
|-----------|-----------|---------------|------|------|----------------|
| AT2G43010 | AT3G59765 | RefActivation | 0.47 | 0.31 | DataActivation |
| AT2G43010 | AT2G28840 | RefActivation | 0.47 | 0.30 | DataActivation |
| AT2G43010 | AT5G65470 | RefActivation | 0.47 | 0.30 | DataActivation |
| AT2G43010 | AT3G13520 | RefActivation | 0.47 | 0.30 | DataActivation |
| AT2G43010 | AT3G44735 | RefActivation | 0.47 | 0.30 | DataActivation |
| AT2G43010 | AT3G18710 | RefActivation | 0.47 | 0.30 | DataActivation |
| AT2G43010 | AT1G20010 | RefActivation | 0.47 | 0.30 | DataActivation |
| AT2G43010 | AT3G23820 | RefActivation | 0.47 | 0.29 | DataActivation |
| AT2G43010 | AT3G58850 | RefActivation | 0.47 | 0.29 | DataActivation |
| AT5G11260 | AT1G09070 | RefActivation | 4.11 | 0.29 | DataRepression |
| AT5G11260 | AT4G36670 | RefActivation | 4.11 | 0.29 | DataRepression |
| AT2G43010 | AT5G48460 | RefActivation | 0.47 | 0.28 | DataActivation |
| AT2G43010 | AT4G29140 | RefActivation | 0.47 | 0.28 | DataActivation |
| AT2G43010 | AT3G52470 | RefActivation | 0.47 | 0.28 | DataActivation |
| AT2G43000 | AT1G66350 | RefActivation | >=6  | 0.28 | DataRepression |
| AT2G43010 | AT1G66350 | RefActivation | 0.47 | 0.28 | DataActivation |
| AT2G43010 | AT2G29980 | RefActivation | 0.47 | 0.28 | DataActivation |
| AT2G43010 | AT5G40630 | RefActivation | 0.47 | 0.28 | DataActivation |
| AT2G43010 | AT3G63430 | RefActivation | 0.47 | 0.27 | DataActivation |
| AT5G11260 | AT5G23010 | RefActivation | 4.11 | 0.27 | DataRepression |
| AT5G11260 | AT5G62520 | RefActivation | 4.11 | 0.27 | DataRepression |
| AT4G18960 | AT4G22950 | RefActivation | 0.02 | 0.27 | DataActivation |
| AT2G43010 | AT4G23500 | RefActivation | 0.47 | 0.27 | DataActivation |
| AT5G35550 | AT3G26790 | RefActivation | 0.00 | 0.27 | DataActivation |
| AT2G43010 | AT1G25450 | RefActivation | 0.47 | 0.27 | DataActivation |
| AT5G11260 | AT1G61890 | RefActivation | 4.11 | 0.27 | DataRepression |
| AT2G43010 | AT1G17830 | RefActivation | 0.47 | 0.27 | DataActivation |
| AT2G43010 | AT1G51940 | RefActivation | 0.47 | 0.27 | DataActivation |
| AT2G43010 | AT5G23210 | RefActivation | 0.47 | 0.26 | DataActivation |
| AT5G15840 | AT1G65480 | RefActivation | 0.16 | 0.26 | DataActivation |
| AT2G43010 | AT4G22010 | RefActivation | 0.47 | 0.26 | DataActivation |
| AT2G43010 | AT5G04340 | RefActivation | 0.47 | 0.25 | DataActivation |
| AT2G43010 | AT1G32170 | RefActivation | 0.47 | 0.25 | DataActivation |
| AT2G43010 | AT5G60680 | RefActivation | 0.47 | 0.25 | DataActivation |
| AT2G43010 | AT2G42800 | RefActivation | 0.47 | 0.25 | DataActivation |
| AT2G43010 | AT5G41460 | RefActivation | 0.47 | 0.25 | DataActivation |
| AT2G43010 | AT1G21140 | RefActivation | 0.47 | 0.25 | DataActivation |
| AT2G43010 | AT5G11740 | RefActivation | 0.47 | 0.25 | DataActivation |
| AT2G43010 | AT1G22530 | RefActivation | 0.47 | 0.24 | DataActivation |
| AT5G11260 | AT1G18740 | RefActivation | 4.11 | 0.24 | DataRepression |
| AT2G43010 | AT1G74660 | RefActivation | 0.47 | 0.24 | DataActivation |
| AT1G32770 | AT5G16600 | RefActivation | 0.00 | 0.24 | DataActivation |
| AT2G43010 | AT3G11420 | RefActivation | 0.47 | 0.24 | DataActivation |
| AT2G43010 | AT3G51400 | RefActivation | 0.47 | 0.23 | DataActivation |
| AT2G43010 | AT2G36410 | RefActivation | 0.47 | 0.23 | DataActivation |
| AT2G43010 | AT2G47060 | RefActivation | 0.47 | 0.23 | DataActivation |
| AT2G43010 | AT2G22122 | RefActivation | 0.47 | 0.23 | DataActivation |
| AT2G43010 | AT1G17620 | RefActivation | 0.47 | 0.23 | DataActivation |
| AT2G43010 | AT3G54020 | RefActivation | 0.47 | 0.22 | DataActivation |
| AT5G11260 | AT2G47460 | RefActivation | 4.11 | 0.22 | DataRepression |
| AT2G43010 | AT5G17165 | RefActivation | 0.47 | 0.22 | DataActivation |
| AT2G43010 | AT5G14920 | RefActivation | 0.47 | 0.22 | DataActivation |

|           |           |               |      |      |                |
|-----------|-----------|---------------|------|------|----------------|
| AT2G43010 | AT5G61660 | RefActivation | 0.47 | 0.22 | DataActivation |
| AT2G43010 | AT2G01150 | RefActivation | 0.47 | 0.22 | DataActivation |
| AT2G43010 | AT2G29730 | RefActivation | 0.47 | 0.22 | DataActivation |
| AT2G43010 | AT1G20440 | RefActivation | 0.47 | 0.22 | DataActivation |
| AT2G22430 | AT1G74930 | RefActivation | 0.44 | 0.21 | DataActivation |
| AT2G43010 | AT1G61260 | RefActivation | 0.47 | 0.21 | DataActivation |
| AT2G43010 | AT2G40000 | RefActivation | 0.47 | 0.21 | DataActivation |
| AT5G11260 | AT2G30040 | RefActivation | 4.11 | 0.21 | DataRepression |
| AT2G43010 | AT2G31360 | RefActivation | 0.47 | 0.21 | DataActivation |
| AT2G43010 | AT1G22740 | RefActivation | 0.47 | 0.21 | DataActivation |
| AT2G43010 | AT2G37280 | RefActivation | 0.47 | 0.21 | DataActivation |
| AT2G43010 | AT5G45830 | RefActivation | 0.47 | 0.20 | DataActivation |
| AT2G43010 | AT5G67480 | RefActivation | 0.47 | 0.20 | DataActivation |
| AT2G43010 | AT1G55330 | RefActivation | 0.47 | 0.20 | DataActivation |
| AT2G43010 | AT2G22170 | RefActivation | 0.47 | 0.20 | DataActivation |
| AT2G43010 | AT5G47240 | RefActivation | 0.47 | 0.20 | DataActivation |
| AT5G11260 | AT4G34150 | RefActivation | 4.11 | 0.20 | DataRepression |
| AT2G43010 | AT3G61640 | RefActivation | 0.47 | 0.20 | DataActivation |
| AT2G43010 | AT4G38580 | RefActivation | 0.47 | 0.19 | DataActivation |
| AT2G43010 | AT4G02290 | RefActivation | 0.47 | 0.19 | DataActivation |
| AT2G43010 | AT5G48900 | RefActivation | 0.47 | 0.19 | DataActivation |
| AT2G43010 | AT4G35480 | RefActivation | 0.47 | 0.19 | DataActivation |
| AT2G43010 | AT1G18570 | RefActivation | 0.47 | 0.19 | DataActivation |
| AT5G11260 | AT1G18570 | RefActivation | 4.11 | 0.19 | DataRepression |
| AT5G11260 | AT4G32800 | RefActivation | 4.11 | 0.19 | DataRepression |
| AT2G43010 | AT3G49530 | RefActivation | 0.47 | 0.19 | DataActivation |
| AT5G11260 | AT2G36220 | RefActivation | 4.11 | 0.19 | DataRepression |
| AT5G11260 | AT1G61340 | RefActivation | 4.11 | 0.19 | DataRepression |
| AT2G43010 | AT3G28910 | RefActivation | 0.47 | 0.19 | DataActivation |
| AT2G43010 | AT5G39860 | RefActivation | 0.47 | 0.19 | DataActivation |
| AT5G11260 | AT2G41100 | RefActivation | 4.11 | 0.19 | DataRepression |
| AT2G43010 | AT1G62480 | RefActivation | 0.47 | 0.19 | DataActivation |
| AT5G11260 | AT1G18300 | RefActivation | 4.11 | 0.18 | DataRepression |
| AT2G43010 | AT4G30660 | RefActivation | 0.47 | 0.18 | DataActivation |
| AT2G43010 | AT1G02205 | RefActivation | 0.47 | 0.18 | DataActivation |
| AT2G43010 | AT4G25620 | RefActivation | 0.47 | 0.18 | DataActivation |
| AT2G43010 | AT3G16180 | RefActivation | 0.47 | 0.17 | DataActivation |
| AT2G43010 | AT5G58600 | RefActivation | 0.47 | 0.17 | DataActivation |
| AT2G43010 | AT1G27670 | RefActivation | 0.47 | 0.17 | DataActivation |
| AT2G43010 | AT3G15530 | RefActivation | 0.47 | 0.17 | DataActivation |
| AT2G43010 | AT5G25810 | RefActivation | 0.47 | 0.17 | DataActivation |
| AT5G11260 | AT5G25810 | RefActivation | 4.11 | 0.17 | DataRepression |
| AT2G43010 | AT4G14560 | RefActivation | 0.47 | 0.17 | DataActivation |
| AT2G43010 | AT5G25240 | RefActivation | 0.47 | 0.17 | DataActivation |
| AT2G43010 | AT4G14130 | RefActivation | 0.47 | 0.16 | DataActivation |
| AT4G23810 | AT4G31800 | RefActivation | 0.10 | 0.16 | DataActivation |
| AT2G43010 | AT5G14360 | RefActivation | 0.47 | 0.16 | DataActivation |
| AT5G11260 | AT4G05100 | RefActivation | 4.11 | 0.16 | DataRepression |
| AT2G43010 | AT3G54200 | RefActivation | 0.47 | 0.16 | DataActivation |
| AT5G11260 | AT5G01100 | RefActivation | 4.11 | 0.16 | DataRepression |
| AT2G43010 | AT5G63350 | RefActivation | 0.47 | 0.16 | DataActivation |
| AT5G11260 | AT2G37430 | RefActivation | 4.11 | 0.16 | DataRepression |

|           |           |               |      |      |                |
|-----------|-----------|---------------|------|------|----------------|
| AT2G43010 | AT5G48450 | RefActivation | 0.47 | 0.16 | DataActivation |
| AT2G43010 | AT1G16850 | RefActivation | 0.47 | 0.16 | DataActivation |
| AT2G43010 | AT3G43190 | RefActivation | 0.47 | 0.15 | DataActivation |
| AT5G11260 | AT1G25400 | RefActivation | 4.11 | 0.15 | DataRepression |
| AT2G43010 | AT4G27657 | RefActivation | 0.47 | 0.15 | DataActivation |
| AT2G43010 | AT3G28857 | RefActivation | 0.47 | 0.15 | DataActivation |
| AT2G43010 | AT2G39920 | RefActivation | 0.47 | 0.15 | DataActivation |
| AT2G43010 | AT5G66080 | RefActivation | 0.47 | 0.15 | DataActivation |
| AT2G43010 | AT4G30370 | RefActivation | 0.47 | 0.15 | DataActivation |
| AT2G43010 | AT2G19450 | RefActivation | 0.47 | 0.15 | DataActivation |
| AT5G11260 | AT5G66210 | RefActivation | 4.11 | 0.15 | DataRepression |
| AT3G26790 | AT1G62290 | RefActivation | 0.27 | 0.14 | DataActivation |
| AT2G43010 | AT1G22065 | RefActivation | 0.47 | 0.14 | DataActivation |
| AT5G11260 | AT4G33920 | RefActivation | 4.11 | 0.14 | DataRepression |
| AT5G11260 | AT3G06160 | RefActivation | 4.11 | 0.14 | DataRepression |
| AT2G43010 | AT5G24030 | RefActivation | 0.47 | 0.14 | DataActivation |
| AT2G43010 | AT1G02660 | RefActivation | 0.47 | 0.14 | DataActivation |
| AT2G47190 | AT5G25610 | RefActivation | 4.79 | 0.14 | DataRepression |
| AT2G43010 | AT3G53990 | RefActivation | 0.47 | 0.14 | DataActivation |
| AT5G11260 | AT3G52400 | RefActivation | 4.11 | 0.14 | DataRepression |
| AT2G43010 | AT1G28330 | RefActivation | 0.47 | 0.14 | DataActivation |
| AT2G43010 | AT2G15830 | RefActivation | 0.47 | 0.14 | DataActivation |
| AT2G43010 | AT5G64260 | RefActivation | 0.47 | 0.14 | DataActivation |
| AT1G09530 | AT5G02200 | RefActivation | 1.77 | 0.14 | DataRepression |
| AT2G43010 | AT5G02200 | RefActivation | 0.47 | 0.14 | DataActivation |
| AT2G43010 | AT3G28180 | RefActivation | 0.47 | 0.14 | DataActivation |
| AT2G43010 | AT3G48260 | RefActivation | 0.47 | 0.14 | DataActivation |
| AT2G43010 | AT3G62570 | RefActivation | 0.47 | 0.13 | DataActivation |
| AT2G43010 | AT4G01250 | RefActivation | 0.47 | 0.13 | DataActivation |
| AT4G23810 | AT4G01250 | RefActivation | 0.10 | 0.13 | DataActivation |
| AT2G43010 | AT5G63810 | RefActivation | 0.47 | 0.13 | DataActivation |
| AT2G43010 | AT2G36050 | RefActivation | 0.47 | 0.13 | DataActivation |
| AT2G43010 | AT2G41640 | RefActivation | 0.47 | 0.13 | DataActivation |
| AT5G11260 | AT2G41640 | RefActivation | 4.11 | 0.13 | DataRepression |
| AT2G43010 | AT1G20450 | RefActivation | 0.47 | 0.13 | DataActivation |
| AT2G43010 | AT5G41080 | RefActivation | 0.47 | 0.13 | DataActivation |
| AT1G09530 | AT4G32280 | RefActivation | 1.77 | 0.12 | DataRepression |
| AT2G43010 | AT4G32280 | RefActivation | 0.47 | 0.12 | DataActivation |
| AT5G11260 | AT2G39650 | RefActivation | 4.11 | 0.12 | DataRepression |
| AT2G43010 | AT1G29490 | RefActivation | 0.47 | 0.12 | DataActivation |
| AT1G74930 | AT3G14440 | RefActivation | 0.21 | 0.12 | DataActivation |
| AT2G43010 | AT3G14440 | RefActivation | 0.47 | 0.12 | DataActivation |
| AT5G08520 | AT3G14440 | RefActivation | 0.38 | 0.12 | DataActivation |
| AT5G11260 | AT3G14440 | RefActivation | 4.11 | 0.12 | DataRepression |
| AT2G43010 | AT3G49930 | RefActivation | 0.47 | 0.12 | DataActivation |
| AT2G43010 | AT2G42570 | RefActivation | 0.47 | 0.11 | DataActivation |
| AT2G43010 | AT3G54000 | RefActivation | 0.47 | 0.11 | DataActivation |
| AT2G43010 | AT1G19320 | RefActivation | 0.47 | 0.11 | DataActivation |
| AT2G43010 | AT4G30430 | RefActivation | 0.47 | 0.11 | DataActivation |
| AT5G11260 | AT3G02840 | RefActivation | 4.11 | 0.11 | DataRepression |
| AT2G43010 | AT5G54585 | RefActivation | 0.47 | 0.11 | DataActivation |
| AT2G43010 | AT3G12700 | RefActivation | 0.47 | 0.11 | DataActivation |

|           |           |               |      |      |                |
|-----------|-----------|---------------|------|------|----------------|
| AT2G43010 | AT3G03170 | RefActivation | 0.47 | 0.11 | DataActivation |
| AT5G11260 | AT5G66650 | RefActivation | 4.11 | 0.11 | DataRepression |
| AT5G11260 | AT5G59550 | RefActivation | 4.11 | 0.11 | DataRepression |
| AT2G43010 | AT3G50800 | RefActivation | 0.47 | 0.11 | DataActivation |
| AT5G11260 | AT3G50800 | RefActivation | 4.11 | 0.11 | DataRepression |
| AT2G43010 | AT5G60760 | RefActivation | 0.47 | 0.10 | DataActivation |
| AT2G43010 | AT5G25190 | RefActivation | 0.47 | 0.10 | DataActivation |
| AT2G43010 | AT1G66400 | RefActivation | 0.47 | 0.10 | DataActivation |
| AT2G43010 | AT3G19680 | RefActivation | 0.47 | 0.10 | DataActivation |
| AT2G43010 | AT2G06200 | RefActivation | 0.47 | 0.10 | DataActivation |
| AT2G43010 | AT5G15230 | RefActivation | 0.47 | 0.10 | DataActivation |
| AT5G11260 | AT1G73540 | RefActivation | 4.11 | 0.10 | DataRepression |
| AT2G43010 | AT1G53830 | RefActivation | 0.47 | 0.10 | DataActivation |
| AT2G43010 | AT5G65300 | RefActivation | 0.47 | 0.10 | DataActivation |
| AT5G11260 | AT5G65300 | RefActivation | 4.11 | 0.10 | DataRepression |
| AT5G11260 | AT2G22880 | RefActivation | 4.11 | 0.10 | DataRepression |
| AT2G43010 | AT1G02800 | RefActivation | 0.47 | 0.09 | DataActivation |
| AT2G43010 | AT1G64380 | RefActivation | 0.47 | 0.09 | DataActivation |
| AT5G11260 | AT1G19380 | RefActivation | 4.11 | 0.09 | DataRepression |
| AT2G43010 | AT2G40610 | RefActivation | 0.47 | 0.09 | DataActivation |
| AT2G43010 | AT1G08500 | RefActivation | 0.47 | 0.09 | DataActivation |
| AT2G43010 | AT5G64870 | RefActivation | 0.47 | 0.09 | DataActivation |
| AT5G11260 | AT5G49520 | RefActivation | 4.11 | 0.09 | DataRepression |
| AT1G74930 | AT4G37770 | RefActivation | 0.21 | 0.09 | DataActivation |
| AT2G43010 | AT4G37770 | RefActivation | 0.47 | 0.09 | DataActivation |
| AT5G11260 | AT4G37770 | RefActivation | 4.11 | 0.09 | DataRepression |
| AT2G43010 | AT4G27460 | RefActivation | 0.47 | 0.09 | DataActivation |
| AT2G43010 | AT4G39360 | RefActivation | 0.47 | 0.09 | DataActivation |
| AT2G43010 | AT5G22500 | RefActivation | 0.47 | 0.09 | DataActivation |
| AT2G43010 | AT1G29395 | RefActivation | 0.47 | 0.09 | DataActivation |
| AT2G43010 | AT1G10560 | RefActivation | 0.47 | 0.09 | DataActivation |
| AT2G43010 | AT4G19120 | RefActivation | 0.47 | 0.09 | DataActivation |
| AT2G43010 | AT1G53180 | RefActivation | 0.47 | 0.08 | DataActivation |
| AT5G11260 | AT4G27280 | RefActivation | 4.11 | 0.08 | DataRepression |
| AT2G43010 | AT1G67265 | RefActivation | 0.47 | 0.08 | DataActivation |
| AT2G43010 | AT3G28340 | RefActivation | 0.47 | 0.08 | DataActivation |
| AT5G11260 | AT1G78440 | RefActivation | 4.11 | 0.08 | DataRepression |
| AT2G43010 | AT3G05880 | RefActivation | 0.47 | 0.08 | DataActivation |
| AT5G11260 | AT1G66160 | RefActivation | 4.11 | 0.08 | DataRepression |
| AT5G11260 | AT3G62720 | RefActivation | 4.11 | 0.08 | DataRepression |
| AT2G43010 | AT3G54810 | RefActivation | 0.47 | 0.08 | DataActivation |
| AT5G11260 | AT3G54810 | RefActivation | 4.11 | 0.08 | DataRepression |
| AT2G43010 | AT2G35710 | RefActivation | 0.47 | 0.07 | DataActivation |
| AT2G43010 | AT4G23870 | RefActivation | 0.47 | 0.07 | DataActivation |
| AT5G11260 | AT5G64660 | RefActivation | 4.11 | 0.07 | DataRepression |
| AT5G11260 | AT2G35290 | RefActivation | 4.11 | 0.07 | DataRepression |
| AT2G43010 | AT1G12845 | RefActivation | 0.47 | 0.07 | DataActivation |
| AT5G11260 | AT2G28630 | RefActivation | 4.11 | 0.07 | DataRepression |
| AT5G11260 | AT5G05410 | RefActivation | 4.11 | 0.07 | DataRepression |
| AT5G11260 | AT1G76600 | RefActivation | 4.11 | 0.07 | DataRepression |
| AT4G18960 | AT4G21590 | RefActivation | 0.02 | 0.07 | DataActivation |
| AT2G43010 | AT4G36010 | RefActivation | 0.47 | 0.06 | DataActivation |

|           |           |               |      |      |                |
|-----------|-----------|---------------|------|------|----------------|
| AT2G43010 | AT2G22500 | RefActivation | 0.47 | 0.06 | DataActivation |
| AT5G11260 | AT2G22500 | RefActivation | 4.11 | 0.06 | DataRepression |
| AT1G09530 | AT2G42870 | RefActivation | 1.77 | 0.06 | DataRepression |
| AT2G43010 | AT2G42870 | RefActivation | 0.47 | 0.06 | DataActivation |
| AT5G11260 | AT2G42870 | RefActivation | 4.11 | 0.06 | DataRepression |
| AT5G11260 | AT3G56880 | RefActivation | 4.11 | 0.06 | DataRepression |
| AT1G09530 | AT3G15540 | RefActivation | 1.77 | 0.06 | DataRepression |
| AT2G43010 | AT3G15540 | RefActivation | 0.47 | 0.06 | DataActivation |
| AT2G43010 | AT5G64310 | RefActivation | 0.47 | 0.06 | DataActivation |
| AT5G11260 | AT3G19350 | RefActivation | 4.11 | 0.06 | DataRepression |
| AT5G11260 | AT1G77640 | RefActivation | 4.11 | 0.06 | DataRepression |
| AT2G43010 | AT1G69890 | RefActivation | 0.47 | 0.06 | DataActivation |
| AT2G43010 | AT1G78860 | RefActivation | 0.47 | 0.05 | DataActivation |
| AT2G43010 | AT1G06360 | RefActivation | 0.47 | 0.05 | DataActivation |
| AT2G43010 | AT5G28630 | RefActivation | 0.47 | 0.05 | DataActivation |
| AT5G11260 | AT3G13600 | RefActivation | 4.11 | 0.05 | DataRepression |
| AT5G11260 | AT2G35930 | RefActivation | 4.11 | 0.05 | DataRepression |
| AT2G43010 | AT4G22490 | RefActivation | 0.47 | 0.04 | DataActivation |
| AT2G43010 | AT5G48250 | RefActivation | 0.47 | 0.04 | DataActivation |
| AT5G11260 | AT3G55980 | RefActivation | 4.11 | 0.04 | DataRepression |
| AT4G18960 | AT1G14540 | RefActivation | 0.02 | 0.04 | DataActivation |
| AT5G11260 | AT1G78990 | RefActivation | 4.11 | 0.04 | DataRepression |
| AT2G43010 | AT4G37240 | RefActivation | 0.47 | 0.04 | DataActivation |
| AT2G43010 | AT5G65390 | RefActivation | 0.47 | 0.03 | DataActivation |
| AT2G43010 | AT4G25470 | RefActivation | 0.47 | 0.03 | DataActivation |
| AT5G11260 | AT2G40080 | RefActivation | 4.11 | 0.03 | DataRepression |
| AT5G11260 | AT5G43890 | RefActivation | 4.11 | 0.03 | DataRepression |
| AT2G43010 | AT1G73550 | RefActivation | 0.47 | 0.03 | DataActivation |
| AT2G43010 | AT5G25110 | RefActivation | 0.47 | 0.03 | DataActivation |
| AT5G11260 | AT4G29780 | RefActivation | 4.11 | 0.02 | DataRepression |
| AT2G43010 | AT3G45970 | RefActivation | 0.47 | 0.02 | DataActivation |
| AT2G43010 | AT1G21910 | RefActivation | 0.47 | 0.02 | DataActivation |
| AT5G11260 | AT1G21910 | RefActivation | 4.11 | 0.02 | DataRepression |
| AT2G43010 | AT4G30650 | RefActivation | 0.47 | 0.02 | DataActivation |
| AT2G43010 | AT4G08950 | RefActivation | 0.47 | 0.02 | DataActivation |
| AT5G11260 | AT4G08950 | RefActivation | 4.11 | 0.02 | DataRepression |
| AT2G43010 | AT2G21660 | RefActivation | 0.47 | 0.02 | DataActivation |
| AT4G18960 | AT1G02190 | RefActivation | 0.02 | 0.02 | DataActivation |
| AT5G11260 | AT1G07135 | RefActivation | 4.11 | 0.02 | DataRepression |
| AT2G43010 | AT5G44260 | RefActivation | 0.47 | 0.02 | DataActivation |
| AT5G11260 | AT1G76650 | RefActivation | 4.11 | 0.01 | DataRepression |
| AT5G11260 | AT5G45340 | RefActivation | 4.11 | 0.01 | DataRepression |
| AT5G11260 | AT5G51190 | RefActivation | 4.11 | 0.01 | DataRepression |
| AT2G43010 | AT3G49570 | RefActivation | 0.47 | 0.01 | DataActivation |
| AT5G11260 | AT2G27080 | RefActivation | 4.11 | 0.01 | DataRepression |
| AT5G11260 | AT4G34410 | RefActivation | 4.11 | 0.01 | DataRepression |
| AT2G43010 | AT3G20810 | RefActivation | 0.47 | 0.01 | DataActivation |
| AT2G43010 | AT1G10550 | RefActivation | 0.47 | 0.01 | DataActivation |
| AT5G11260 | AT4G25490 | RefActivation | 4.11 | 0.00 | DataRepression |
| AT2G43010 | AT3G49580 | RefActivation | 0.47 | 0.00 | DataActivation |
| AT2G42200 | AT1G69120 | RefActivation | 0.31 | 0.00 | DataActivation |
| AT2G43010 | AT1G22470 | RefActivation | 0.47 | 0.00 | DataActivation |

|           |           |               |      |      |                |
|-----------|-----------|---------------|------|------|----------------|
| AT2G43010 | AT3G14880 | RefActivation | 0.47 | 0.00 | DataActivation |
| AT2G43010 | AT3G49820 | RefActivation | 0.47 | 0.00 | DataActivation |
| AT2G43010 | AT4G13790 | RefActivation | 0.47 | 0.00 | DataActivation |
| AT2G43010 | AT4G25580 | RefActivation | 0.47 | 0.00 | DataActivation |
| AT2G43010 | AT5G15150 | RefActivation | 0.47 | 0.00 | DataActivation |
| AT2G43010 | AT5G38700 | RefActivation | 0.47 | 0.00 | DataActivation |
| AT2G43010 | AT5G39240 | RefActivation | 0.47 | 0.00 | DataActivation |
| AT4G35900 | AT1G69120 | RefActivation | 0.13 | 0.00 | DataActivation |
| AT5G11260 | AT3G22830 | RefActivation | 4.11 | 0.00 | DataRepression |
| AT2G43010 | AT1G01060 | RefRepression | 0.47 | >=6  | DataRepression |
| AT2G43010 | AT1G05880 | RefRepression | 0.47 | >=6  | DataRepression |
| AT2G43010 | AT1G17615 | RefRepression | 0.47 | >=6  | DataRepression |
| AT2G43010 | AT1G18075 | RefRepression | 0.47 | >=6  | DataRepression |
| AT2G43010 | AT1G23020 | RefRepression | 0.47 | >=6  | DataRepression |
| AT2G43010 | AT1G72490 | RefRepression | 0.47 | >=6  | DataRepression |
| AT2G43010 | AT1G78290 | RefRepression | 0.47 | >=6  | DataRepression |
| AT2G43010 | AT2G25470 | RefRepression | 0.47 | >=6  | DataRepression |
| AT2G43010 | AT2G43000 | RefRepression | 0.47 | >=6  | DataRepression |
| AT2G43010 | AT2G43140 | RefRepression | 0.47 | >=6  | DataRepression |
| AT2G43010 | AT2G46830 | RefRepression | 0.47 | >=6  | DataRepression |
| AT2G43010 | AT3G12320 | RefRepression | 0.47 | >=6  | DataRepression |
| AT2G43010 | AT3G24900 | RefRepression | 0.47 | >=6  | DataRepression |
| AT2G43010 | AT3G54990 | RefRepression | 0.47 | >=6  | DataRepression |
| AT2G43010 | AT3G56290 | RefRepression | 0.47 | >=6  | DataRepression |
| AT2G43010 | AT3G56350 | RefRepression | 0.47 | >=6  | DataRepression |
| AT2G43010 | AT3G59930 | RefRepression | 0.47 | >=6  | DataRepression |
| AT2G43010 | AT4G36700 | RefRepression | 0.47 | >=6  | DataRepression |
| AT2G43010 | AT5G04190 | RefRepression | 0.47 | >=6  | DataRepression |
| AT2G43010 | AT5G06980 | RefRepression | 0.47 | >=6  | DataRepression |
| AT3G47640 | AT1G23020 | RefRepression | 2.44 | >=6  | DataActivation |
| AT5G08330 | AT2G46830 | RefRepression | 0.18 | >=6  | DataRepression |
| AT5G11260 | AT2G43570 | RefRepression | 4.11 | >=6  | DataActivation |
| AT5G11260 | AT3G21890 | RefRepression | 4.11 | >=6  | DataActivation |
| AT5G11260 | AT2G15020 | RefRepression | 4.11 | >=6  | DataActivation |
| AT2G43010 | AT3G61890 | RefRepression | 0.47 | 5.40 | DataRepression |
| AT2G43010 | AT5G52570 | RefRepression | 0.47 | 5.31 | DataRepression |
| AT2G43010 | AT5G48540 | RefRepression | 0.47 | 5.27 | DataRepression |
| AT2G43010 | AT3G54500 | RefRepression | 0.47 | 5.13 | DataRepression |
| AT5G11260 | AT5G24140 | RefRepression | 4.11 | 4.92 | DataActivation |
| AT2G43010 | AT4G25070 | RefRepression | 0.47 | 4.85 | DataRepression |
| AT2G43010 | AT1G06570 | RefRepression | 0.47 | 4.85 | DataRepression |
| AT2G43010 | AT1G10070 | RefRepression | 0.47 | 4.69 | DataRepression |
| AT5G11260 | AT3G01350 | RefRepression | 4.11 | 4.55 | DataActivation |
| AT2G43010 | AT1G78030 | RefRepression | 0.47 | 4.17 | DataRepression |
| AT2G43010 | AT5G67370 | RefRepression | 0.47 | 4.02 | DataRepression |
| AT2G43010 | AT4G27300 | RefRepression | 0.47 | 3.96 | DataRepression |
| AT2G43010 | AT1G69160 | RefRepression | 0.47 | 3.94 | DataRepression |
| AT2G43010 | AT2G46790 | RefRepression | 0.47 | 3.94 | DataRepression |
| AT3G47640 | AT5G13740 | RefRepression | 2.44 | 3.94 | DataActivation |
| AT2G43010 | AT5G58770 | RefRepression | 0.47 | 3.93 | DataRepression |
| AT2G43010 | AT5G03350 | RefRepression | 0.47 | 3.89 | DataRepression |
| AT5G11260 | AT2G33380 | RefRepression | 4.11 | 3.87 | DataActivation |

|           |           |               |      |      |                |
|-----------|-----------|---------------|------|------|----------------|
| AT2G43010 | AT5G53970 | RefRepression | 0.47 | 3.78 | DataRepression |
| AT2G43010 | AT2G46680 | RefRepression | 0.47 | 3.64 | DataRepression |
| AT2G43010 | AT4G38840 | RefRepression | 0.47 | 3.62 | DataRepression |
| AT2G43010 | AT2G30520 | RefRepression | 0.47 | 3.62 | DataRepression |
| AT2G43010 | AT1G23090 | RefRepression | 0.47 | 3.59 | DataRepression |
| AT2G43010 | AT1G79110 | RefRepression | 0.47 | 3.52 | DataRepression |
| AT5G11260 | AT2G43590 | RefRepression | 4.11 | 3.40 | DataActivation |
| AT2G43010 | AT1G07010 | RefRepression | 0.47 | 3.39 | DataRepression |
| AT2G43010 | AT3G61198 | RefRepression | 0.47 | 3.28 | DataRepression |
| AT2G43010 | AT5G47610 | RefRepression | 0.47 | 3.17 | DataRepression |
| AT5G11260 | AT5G17760 | RefRepression | 4.11 | 3.11 | DataActivation |
| AT2G43010 | AT4G16370 | RefRepression | 0.47 | 2.88 | DataRepression |
| AT2G43010 | AT3G27060 | RefRepression | 0.47 | 2.85 | DataRepression |
| AT2G43010 | AT1G56170 | RefRepression | 0.47 | 2.75 | DataRepression |
| AT2G43010 | AT1G01580 | RefRepression | 0.47 | 2.67 | DataRepression |
| AT2G43010 | AT1G18460 | RefRepression | 0.47 | 2.66 | DataRepression |
| AT2G43010 | AT1G37130 | RefRepression | 0.47 | 2.64 | DataRepression |
| AT2G43010 | AT1G31835 | RefRepression | 0.47 | 2.59 | DataRepression |
| AT2G43010 | AT5G67030 | RefRepression | 0.47 | 2.55 | DataRepression |
| AT2G43010 | AT1G19670 | RefRepression | 0.47 | 2.45 | DataRepression |
| AT2G43010 | AT3G47640 | RefRepression | 0.47 | 2.44 | DataRepression |
| AT2G43010 | AT5G05250 | RefRepression | 0.47 | 2.41 | DataRepression |
| AT5G11260 | AT1G17100 | RefRepression | 4.11 | 2.38 | DataActivation |
| AT2G43010 | AT1G44575 | RefRepression | 0.47 | 2.37 | DataRepression |
| AT3G47640 | AT1G56430 | RefRepression | 2.44 | 2.33 | DataActivation |
| AT2G43010 | AT1G32190 | RefRepression | 0.47 | 2.32 | DataRepression |
| AT2G43010 | AT1G73660 | RefRepression | 0.47 | 2.21 | DataRepression |
| AT2G43010 | AT2G44670 | RefRepression | 0.47 | 2.21 | DataRepression |
| AT2G43010 | AT1G70200 | RefRepression | 0.47 | 2.20 | DataRepression |
| AT2G43010 | AT1G13245 | RefRepression | 0.47 | 2.18 | DataRepression |
| AT2G43010 | AT1G27050 | RefRepression | 0.47 | 2.15 | DataRepression |
| AT2G43010 | AT1G50020 | RefRepression | 0.47 | 2.14 | DataRepression |
| AT2G43010 | AT4G27860 | RefRepression | 0.47 | 2.07 | DataRepression |
| AT2G43010 | AT1G06040 | RefRepression | 0.47 | 2.04 | DataRepression |
| AT2G43010 | AT1G68830 | RefRepression | 0.47 | 1.89 | DataRepression |
| AT5G11260 | AT4G34610 | RefRepression | 4.11 | 1.89 | DataActivation |
| AT2G43010 | AT1G30680 | RefRepression | 0.47 | 1.87 | DataRepression |
| AT2G43010 | AT2G19870 | RefRepression | 0.47 | 1.83 | DataRepression |
| AT2G43010 | AT1G28580 | RefRepression | 0.47 | 1.82 | DataRepression |
| AT2G43010 | AT3G29240 | RefRepression | 0.47 | 1.82 | DataRepression |
| AT2G43010 | AT1G42550 | RefRepression | 0.47 | 1.78 | DataRepression |
| AT2G43010 | AT3G01860 | RefRepression | 0.47 | 0.59 | DataActivation |
| AT2G43010 | AT4G39050 | RefRepression | 0.47 | 0.58 | DataActivation |
| AT2G43010 | AT2G41880 | RefRepression | 0.47 | 0.54 | DataActivation |
| AT2G43010 | AT4G38420 | RefRepression | 0.47 | 0.53 | DataActivation |
| AT2G43010 | AT2G03710 | RefRepression | 0.47 | 0.52 | DataActivation |
| AT2G43010 | AT4G19830 | RefRepression | 0.47 | 0.51 | DataActivation |
| AT2G43010 | AT3G60380 | RefRepression | 0.47 | 0.51 | DataActivation |
| AT2G43010 | AT3G52840 | RefRepression | 0.47 | 0.50 | DataActivation |
| AT2G43010 | AT3G06780 | RefRepression | 0.47 | 0.49 | DataActivation |
| AT2G43010 | AT2G16280 | RefRepression | 0.47 | 0.48 | DataActivation |
| AT2G43010 | AT3G05625 | RefRepression | 0.47 | 0.47 | DataActivation |



|           |           |               |      |      |                |
|-----------|-----------|---------------|------|------|----------------|
| AT2G43010 | AT4G14480 | RefRepression | 0.47 | 0.47 | DataActivation |
| AT2G43010 | AT4G28750 | RefRepression | 0.47 | 0.46 | DataActivation |
| AT2G43010 | AT2G39700 | RefRepression | 0.47 | 0.46 | DataActivation |
| AT2G43010 | AT5G39210 | RefRepression | 0.47 | 0.46 | DataActivation |
| AT2G43010 | AT5G01240 | RefRepression | 0.47 | 0.46 | DataActivation |
| AT2G43010 | AT5G43810 | RefRepression | 0.47 | 0.45 | DataActivation |
| AT2G43010 | AT3G61470 | RefRepression | 0.47 | 0.45 | DataActivation |
| AT2G43010 | AT1G15000 | RefRepression | 0.47 | 0.45 | DataActivation |
| AT2G43010 | AT2G46510 | RefRepression | 0.47 | 0.45 | DataActivation |
| AT2G43010 | AT4G18240 | RefRepression | 0.47 | 0.45 | DataActivation |
| AT2G43010 | AT5G62220 | RefRepression | 0.47 | 0.44 | DataActivation |
| AT2G43010 | AT4G37080 | RefRepression | 0.47 | 0.44 | DataActivation |
| AT5G11260 | AT2G38750 | RefRepression | 4.11 | 0.43 | DataRepression |
| AT2G43010 | AT5G38510 | RefRepression | 0.47 | 0.42 | DataActivation |
| AT2G43010 | AT5G43870 | RefRepression | 0.47 | 0.42 | DataActivation |
| AT2G43010 | AT1G32540 | RefRepression | 0.47 | 0.41 | DataActivation |
| AT2G43010 | AT4G05180 | RefRepression | 0.47 | 0.41 | DataActivation |
| AT2G43010 | AT4G03205 | RefRepression | 0.47 | 0.40 | DataActivation |
| AT2G43010 | AT1G70430 | RefRepression | 0.47 | 0.40 | DataActivation |
| AT2G43010 | AT3G27960 | RefRepression | 0.47 | 0.40 | DataActivation |
| AT2G43010 | AT4G12430 | RefRepression | 0.47 | 0.38 | DataActivation |
| AT2G43010 | AT2G23760 | RefRepression | 0.47 | 0.38 | DataActivation |
| AT2G43010 | AT3G14550 | RefRepression | 0.47 | 0.37 | DataActivation |
| AT2G43010 | AT2G20570 | RefRepression | 0.47 | 0.37 | DataActivation |
| AT2G43010 | AT5G15160 | RefRepression | 0.47 | 0.36 | DataActivation |
| AT2G43010 | AT3G01490 | RefRepression | 0.47 | 0.36 | DataActivation |
| AT2G43010 | AT5G60860 | RefRepression | 0.47 | 0.36 | DataActivation |
| AT5G11260 | AT4G35030 | RefRepression | 4.11 | 0.35 | DataRepression |
| AT2G43010 | AT4G25100 | RefRepression | 0.47 | 0.35 | DataActivation |
| AT2G43010 | AT2G01420 | RefRepression | 0.47 | 0.35 | DataActivation |
| AT2G43010 | AT2G39220 | RefRepression | 0.47 | 0.35 | DataActivation |
| AT2G43000 | AT3G50660 | RefRepression | >=6  | 0.35 | DataRepression |
| AT2G43010 | AT2G01890 | RefRepression | 0.47 | 0.34 | DataActivation |
| AT2G43010 | AT1G08920 | RefRepression | 0.47 | 0.34 | DataActivation |
| AT2G43010 | AT4G01330 | RefRepression | 0.47 | 0.34 | DataActivation |
| AT2G43010 | AT1G05490 | RefRepression | 0.47 | 0.34 | DataActivation |
| AT2G43010 | AT4G38690 | RefRepression | 0.47 | 0.34 | DataActivation |
| AT2G43010 | AT3G29320 | RefRepression | 0.47 | 0.33 | DataActivation |
| AT2G43010 | AT5G62350 | RefRepression | 0.47 | 0.32 | DataActivation |
| AT2G43010 | AT5G53500 | RefRepression | 0.47 | 0.32 | DataActivation |
| AT2G43010 | AT1G29660 | RefRepression | 0.47 | 0.31 | DataActivation |
| AT1G69120 | AT2G42200 | RefRepression | 0.00 | 0.31 | DataActivation |
| AT2G43010 | AT2G37940 | RefRepression | 0.47 | 0.31 | DataActivation |
| AT2G43010 | AT3G30340 | RefRepression | 0.47 | 0.31 | DataActivation |
| AT2G43010 | AT4G11320 | RefRepression | 0.47 | 0.31 | DataActivation |
| AT2G43010 | AT4G04630 | RefRepression | 0.47 | 0.28 | DataActivation |
| AT2G43010 | AT4G23500 | RefRepression | 0.47 | 0.27 | DataActivation |
| AT2G43010 | AT5G20635 | RefRepression | 0.47 | 0.27 | DataActivation |
| AT2G43010 | AT5G47640 | RefRepression | 0.47 | 0.27 | DataActivation |
| AT2G43010 | AT1G24530 | RefRepression | 0.47 | 0.26 | DataActivation |
| AT5G11260 | AT1G24530 | RefRepression | 4.11 | 0.26 | DataRepression |
| AT2G43010 | AT4G21910 | RefRepression | 0.47 | 0.26 | DataActivation |

|           |           |               |      |      |                |
|-----------|-----------|---------------|------|------|----------------|
| AT1G69120 | AT1G65480 | RefRepression | 0.00 | 0.26 | DataActivation |
| AT5G10140 | AT1G65480 | RefRepression | >=6  | 0.26 | DataRepression |
| AT2G43010 | AT5G54710 | RefRepression | 0.47 | 0.26 | DataActivation |
| AT2G43010 | AT3G50240 | RefRepression | 0.47 | 0.25 | DataActivation |
| AT5G11260 | AT1G10760 | RefRepression | 4.11 | 0.25 | DataRepression |
| AT2G43010 | AT1G21130 | RefRepression | 0.47 | 0.25 | DataActivation |
| AT4G04450 | AT3G23430 | RefRepression | 0.22 | 0.24 | DataActivation |
| AT5G11260 | AT2G29630 | RefRepression | 4.11 | 0.23 | DataRepression |
| AT2G43010 | AT3G45730 | RefRepression | 0.47 | 0.22 | DataActivation |
| AT2G43010 | AT5G22920 | RefRepression | 0.47 | 0.22 | DataActivation |
| AT2G25000 | AT4G04450 | RefRepression | 4.86 | 0.22 | DataRepression |
| AT4G23810 | AT4G04450 | RefRepression | 0.10 | 0.22 | DataActivation |
| AT2G43010 | AT5G24920 | RefRepression | 0.47 | 0.22 | DataActivation |
| AT2G43010 | AT5G58900 | RefRepression | 0.47 | 0.21 | DataActivation |
| AT2G43010 | AT1G12090 | RefRepression | 0.47 | 0.21 | DataActivation |
| AT2G43010 | AT5G45830 | RefRepression | 0.47 | 0.20 | DataActivation |
| AT2G43010 | AT5G67480 | RefRepression | 0.47 | 0.20 | DataActivation |
| AT2G43010 | AT1G18570 | RefRepression | 0.47 | 0.19 | DataActivation |
| AT2G43010 | AT2G41100 | RefRepression | 0.47 | 0.19 | DataActivation |
| AT2G43010 | AT5G08330 | RefRepression | 0.47 | 0.18 | DataActivation |
| AT2G43010 | AT5G58600 | RefRepression | 0.47 | 0.17 | DataActivation |
| AT2G43010 | AT2G46530 | RefRepression | 0.47 | 0.16 | DataActivation |
| AT2G43010 | AT3G53800 | RefRepression | 0.47 | 0.16 | DataActivation |
| AT5G11260 | AT1G16850 | RefRepression | 4.11 | 0.16 | DataRepression |
| AT2G43010 | AT1G70090 | RefRepression | 0.47 | 0.16 | DataActivation |
| AT2G43010 | AT4G27657 | RefRepression | 0.47 | 0.15 | DataActivation |
| AT2G43010 | AT2G21650 | RefRepression | 0.47 | 0.14 | DataActivation |
| AT2G43010 | AT3G52910 | RefRepression | 0.47 | 0.14 | DataActivation |
| AT1G69120 | AT5G03840 | RefRepression | 0.00 | 0.13 | DataActivation |
| AT2G43010 | AT2G36050 | RefRepression | 0.47 | 0.13 | DataActivation |
| AT5G10140 | AT4G35900 | RefRepression | >=6  | 0.13 | DataRepression |
| AT2G43010 | AT5G41080 | RefRepression | 0.47 | 0.13 | DataActivation |
| AT2G43010 | AT5G15230 | RefRepression | 0.47 | 0.10 | DataActivation |
| AT2G43010 | AT2G40610 | RefRepression | 0.47 | 0.09 | DataActivation |
| AT3G26790 | AT1G80340 | RefRepression | 0.27 | 0.09 | DataActivation |
| AT2G43010 | AT1G72520 | RefRepression | 0.47 | 0.09 | DataActivation |
| AT2G43010 | AT5G48940 | RefRepression | 0.47 | 0.08 | DataActivation |
| AT2G43010 | AT4G23870 | RefRepression | 0.47 | 0.07 | DataActivation |
| AT1G01060 | AT5G61380 | RefRepression | >=6  | 0.07 | DataRepression |
| AT2G46830 | AT5G61380 | RefRepression | >=6  | 0.07 | DataRepression |
| AT2G43010 | AT4G04330 | RefRepression | 0.47 | 0.06 | DataActivation |
| AT2G43010 | AT3G15720 | RefRepression | 0.47 | 0.06 | DataActivation |
| AT2G43010 | AT1G49220 | RefRepression | 0.47 | 0.05 | DataActivation |
| AT5G11260 | AT3G07650 | RefRepression | 4.11 | 0.04 | DataRepression |
| AT2G43010 | AT1G14540 | RefRepression | 0.47 | 0.04 | DataActivation |
| AT2G46830 | AT5G24470 | RefRepression | >=6  | 0.03 | DataRepression |
| AT2G43010 | AT5G65390 | RefRepression | 0.47 | 0.03 | DataActivation |
| AT1G01060 | AT2G40080 | RefRepression | >=6  | 0.03 | DataRepression |
| AT2G46830 | AT2G40080 | RefRepression | >=6  | 0.03 | DataRepression |
| AT2G43010 | AT5G62360 | RefRepression | 0.47 | 0.02 | DataActivation |
| AT5G02030 | AT4G18960 | RefRepression | 0.43 | 0.02 | DataActivation |
| AT2G43010 | AT1G09350 | RefRepression | 0.47 | 0.01 | DataActivation |

|           |           |               |      |      |                |
|-----------|-----------|---------------|------|------|----------------|
| AT2G43010 | AT5G20630 | RefRepression | 0.47 | 0.01 | DataActivation |
| AT2G43010 | AT3G20810 | RefRepression | 0.47 | 0.01 | DataActivation |
| AT2G43010 | AT1G33760 | RefRepression | 0.47 | 0.01 | DataActivation |
| AT2G43010 | AT4G27980 | RefRepression | 0.47 | 0.00 | DataActivation |
| AT2G43010 | AT5G60880 | RefRepression | 0.47 | 0.00 | DataActivation |
| AT5G11260 | AT2G28780 | RefRepression | 4.11 | 0.00 | DataRepression |

| TF(Trisomy2) | Target gene | Relation (AtRegNet) | Ratio(TF) | Ratio(target) | Relation (Data) |
|--------------|-------------|---------------------|-----------|---------------|-----------------|
| AT4G01250    | AT3G23240   | RefActivation       | 3.54      | >=6           | DataActivation  |
| AT4G01250    | AT1G19540   | RefActivation       | 3.54      | 3.35          | DataActivation  |
| AT4G01250    | AT2G38960   | RefActivation       | 3.54      | 2.54          | DataActivation  |
| AT4G01250    | AT3G11840   | RefActivation       | 3.54      | 2.41          | DataActivation  |
| AT2G43010    | AT1G02360   | RefActivation       | 2.14      | >=6           | DataActivation  |
| AT2G43010    | AT1G06080   | RefActivation       | 2.14      | >=6           | DataActivation  |
| AT2G43010    | AT1G07985   | RefActivation       | 2.14      | >=6           | DataActivation  |
| AT2G43010    | AT1G10070   | RefActivation       | 2.14      | >=6           | DataActivation  |
| AT2G43010    | AT1G17400   | RefActivation       | 2.14      | >=6           | DataActivation  |
| AT2G43010    | AT1G29490   | RefActivation       | 2.14      | >=6           | DataActivation  |
| AT2G43010    | AT1G34580   | RefActivation       | 2.14      | >=6           | DataActivation  |
| AT2G43010    | AT1G35230   | RefActivation       | 2.14      | >=6           | DataActivation  |
| AT2G43010    | AT1G69160   | RefActivation       | 2.14      | >=6           | DataActivation  |
| AT2G43010    | AT1G74650   | RefActivation       | 2.14      | >=6           | DataActivation  |
| AT2G43010    | AT1G75490   | RefActivation       | 2.14      | >=6           | DataActivation  |
| AT2G43010    | AT1G75830   | RefActivation       | 2.14      | >=6           | DataActivation  |
| AT2G43010    | AT1G78850   | RefActivation       | 2.14      | >=6           | DataActivation  |
| AT2G43010    | AT1G78860   | RefActivation       | 2.14      | >=6           | DataActivation  |
| AT2G43010    | AT2G14900   | RefActivation       | 2.14      | >=6           | DataActivation  |
| AT2G43010    | AT2G18690   | RefActivation       | 2.14      | >=6           | DataActivation  |
| AT2G43010    | AT2G39210   | RefActivation       | 2.14      | >=6           | DataActivation  |
| AT2G43010    | AT2G43140   | RefActivation       | 2.14      | >=6           | DataActivation  |
| AT2G43010    | AT2G44080   | RefActivation       | 2.14      | >=6           | DataActivation  |
| AT2G43010    | AT2G46830   | RefActivation       | 2.14      | >=6           | DataActivation  |
| AT2G43010    | AT3G12320   | RefActivation       | 2.14      | >=6           | DataActivation  |
| AT2G43010    | AT3G13790   | RefActivation       | 2.14      | >=6           | DataActivation  |
| AT2G43010    | AT3G15500   | RefActivation       | 2.14      | >=6           | DataActivation  |
| AT2G43010    | AT3G27170   | RefActivation       | 2.14      | >=6           | DataActivation  |
| AT2G43010    | AT3G29370   | RefActivation       | 2.14      | >=6           | DataActivation  |
| AT2G43010    | AT3G55240   | RefActivation       | 2.14      | >=6           | DataActivation  |
| AT2G43010    | AT4G01335   | RefActivation       | 2.14      | >=6           | DataActivation  |
| AT2G43010    | AT4G16260   | RefActivation       | 2.14      | >=6           | DataActivation  |
| AT2G43010    | AT4G27450   | RefActivation       | 2.14      | >=6           | DataActivation  |
| AT2G43010    | AT4G27970   | RefActivation       | 2.14      | >=6           | DataActivation  |
| AT2G43010    | AT4G34770   | RefActivation       | 2.14      | >=6           | DataActivation  |
| AT2G43010    | AT4G35770   | RefActivation       | 2.14      | >=6           | DataActivation  |
| AT2G43010    | AT4G37770   | RefActivation       | 2.14      | >=6           | DataActivation  |
| AT2G43010    | AT5G04190   | RefActivation       | 2.14      | >=6           | DataActivation  |
| AT2G43010    | AT5G04530   | RefActivation       | 2.14      | >=6           | DataActivation  |
| AT2G43010    | AT5G06980   | RefActivation       | 2.14      | >=6           | DataActivation  |
| AT2G43010    | AT5G07010   | RefActivation       | 2.14      | >=6           | DataActivation  |
| AT2G43010    | AT5G15150   | RefActivation       | 2.14      | >=6           | DataActivation  |
| AT2G43010    | AT5G19110   | RefActivation       | 2.14      | >=6           | DataActivation  |
| AT2G43010    | AT5G44460   | RefActivation       | 2.14      | >=6           | DataActivation  |
| AT2G43010    | AT5G62280   | RefActivation       | 2.14      | >=6           | DataActivation  |
| AT2G43010    | AT5G66690   | RefActivation       | 2.14      | >=6           | DataActivation  |
| AT2G43010    | AT2G20670   | RefActivation       | 2.14      | 5.98          | DataActivation  |
| AT2G43010    | AT1G14870   | RefActivation       | 2.14      | 5.96          | DataActivation  |
| AT2G43010    | AT5G07000   | RefActivation       | 2.14      | 5.92          | DataActivation  |
| AT2G43010    | AT3G54510   | RefActivation       | 2.14      | 5.91          | DataActivation  |
| AT2G43010    | AT5G01250   | RefActivation       | 2.14      | 5.90          | DataActivation  |

|           |           |               |      |      |                |
|-----------|-----------|---------------|------|------|----------------|
| AT2G43010 | AT4G36110 | RefActivation | 2.14 | 5.43 | DataActivation |
| AT2G43010 | AT2G28190 | RefActivation | 2.14 | 5.35 | DataActivation |
| AT2G43010 | AT3G50740 | RefActivation | 2.14 | 5.34 | DataActivation |
| AT2G43010 | AT4G39070 | RefActivation | 2.14 | 5.03 | DataActivation |
| AT2G43010 | AT1G15550 | RefActivation | 2.14 | 5.02 | DataActivation |
| AT2G43010 | AT2G28056 | RefActivation | 2.14 | 5.01 | DataActivation |
| AT2G43010 | AT3G29670 | RefActivation | 2.14 | 4.85 | DataActivation |
| AT2G43010 | AT4G36380 | RefActivation | 2.14 | 4.72 | DataActivation |
| AT2G43010 | AT4G20362 | RefActivation | 2.14 | 4.71 | DataActivation |
| AT2G43010 | AT2G42610 | RefActivation | 2.14 | 4.61 | DataActivation |
| AT2G43010 | AT2G46790 | RefActivation | 2.14 | 4.46 | DataActivation |
| AT2G43010 | AT2G01610 | RefActivation | 2.14 | 4.45 | DataActivation |
| AT2G43010 | AT1G15010 | RefActivation | 2.14 | 4.44 | DataActivation |
| AT2G43010 | AT3G17520 | RefActivation | 2.14 | 4.41 | DataActivation |
| AT2G43010 | AT5G07030 | RefActivation | 2.14 | 4.39 | DataActivation |
| AT2G43010 | AT2G21510 | RefActivation | 2.14 | 4.25 | DataActivation |
| AT2G43010 | AT5G01740 | RefActivation | 2.14 | 4.20 | DataActivation |
| AT2G43010 | AT2G37025 | RefActivation | 2.14 | 4.19 | DataActivation |
| AT2G43010 | AT5G22500 | RefActivation | 2.14 | 4.14 | DataActivation |
| AT2G43010 | AT1G22360 | RefActivation | 2.14 | 3.88 | DataActivation |
| AT2G43010 | AT3G50800 | RefActivation | 2.14 | 3.82 | DataActivation |
| AT2G43010 | AT5G03150 | RefActivation | 2.14 | 3.79 | DataActivation |
| AT2G43010 | AT1G18400 | RefActivation | 2.14 | 3.71 | DataActivation |
| AT2G43010 | AT1G28130 | RefActivation | 2.14 | 3.67 | DataActivation |
| AT2G43010 | AT1G14280 | RefActivation | 2.14 | 3.61 | DataActivation |
| AT2G43010 | AT4G01250 | RefActivation | 2.14 | 3.54 | DataActivation |
| AT2G43010 | AT2G43050 | RefActivation | 2.14 | 3.51 | DataActivation |
| AT2G43010 | AT1G53180 | RefActivation | 2.14 | 3.47 | DataActivation |
| AT2G43010 | AT4G29190 | RefActivation | 2.14 | 3.44 | DataActivation |
| AT2G43010 | AT3G05890 | RefActivation | 2.14 | 3.39 | DataActivation |
| AT2G43010 | AT2G37280 | RefActivation | 2.14 | 3.32 | DataActivation |
| AT2G43010 | AT1G21050 | RefActivation | 2.14 | 3.32 | DataActivation |
| AT2G43010 | AT4G19420 | RefActivation | 2.14 | 3.31 | DataActivation |
| AT2G43010 | AT5G66110 | RefActivation | 2.14 | 3.30 | DataActivation |
| AT2G43010 | AT4G27310 | RefActivation | 2.14 | 3.27 | DataActivation |
| AT2G43010 | AT3G23930 | RefActivation | 2.14 | 3.25 | DataActivation |
| AT2G43010 | AT1G16300 | RefActivation | 2.14 | 3.17 | DataActivation |
| AT2G43010 | AT1G64710 | RefActivation | 2.14 | 3.13 | DataActivation |
| AT2G43010 | AT5G49360 | RefActivation | 2.14 | 3.12 | DataActivation |
| AT2G43010 | AT1G18570 | RefActivation | 2.14 | 3.09 | DataActivation |
| AT2G43010 | AT1G48260 | RefActivation | 2.14 | 3.06 | DataActivation |
| AT2G43010 | AT3G54500 | RefActivation | 2.14 | 3.01 | DataActivation |
| AT2G43010 | AT5G51460 | RefActivation | 2.14 | 2.97 | DataActivation |
| AT2G43010 | AT2G18700 | RefActivation | 2.14 | 2.97 | DataActivation |
| AT2G43010 | AT2G26440 | RefActivation | 2.14 | 2.96 | DataActivation |
| AT2G43010 | AT1G76090 | RefActivation | 2.14 | 2.91 | DataActivation |
| AT2G43010 | AT2G47780 | RefActivation | 2.14 | 2.88 | DataActivation |
| AT2G43010 | AT3G23090 | RefActivation | 2.14 | 2.88 | DataActivation |
| AT2G43010 | AT2G39700 | RefActivation | 2.14 | 2.77 | DataActivation |
| AT2G43010 | AT1G73480 | RefActivation | 2.14 | 2.70 | DataActivation |
| AT2G43010 | AT5G11670 | RefActivation | 2.14 | 2.70 | DataActivation |
| AT2G43010 | AT1G15350 | RefActivation | 2.14 | 2.70 | DataActivation |

|           |           |               |      |      |                |
|-----------|-----------|---------------|------|------|----------------|
| AT2G43010 | AT2G01450 | RefActivation | 2.14 | 2.69 | DataActivation |
| AT2G43010 | AT5G14230 | RefActivation | 2.14 | 2.59 | DataActivation |
| AT2G43010 | AT2G37940 | RefActivation | 2.14 | 2.59 | DataActivation |
| AT2G43010 | AT5G15860 | RefActivation | 2.14 | 2.52 | DataActivation |
| AT2G43010 | AT2G39980 | RefActivation | 2.14 | 2.49 | DataActivation |
| AT2G43010 | AT1G02340 | RefActivation | 2.14 | 2.47 | DataActivation |
| AT2G43010 | AT1G10140 | RefActivation | 2.14 | 2.43 | DataActivation |
| AT2G43010 | AT5G03140 | RefActivation | 2.14 | 2.42 | DataActivation |
| AT2G43010 | AT3G59060 | RefActivation | 2.14 | 2.39 | DataActivation |
| AT2G43010 | AT1G06570 | RefActivation | 2.14 | 2.37 | DataActivation |
| AT2G43010 | AT1G74660 | RefActivation | 2.14 | 2.36 | DataActivation |
| AT2G43010 | AT2G30140 | RefActivation | 2.14 | 2.34 | DataActivation |
| AT2G43010 | AT4G18550 | RefActivation | 2.14 | 2.34 | DataActivation |
| AT2G43010 | AT3G61460 | RefActivation | 2.14 | 2.32 | DataActivation |
| AT2G43010 | AT2G02170 | RefActivation | 2.14 | 2.31 | DataActivation |
| AT2G43010 | AT2G41070 | RefActivation | 2.14 | 2.30 | DataActivation |
| AT2G43010 | AT2G44490 | RefActivation | 2.14 | 2.28 | DataActivation |
| AT2G43010 | AT3G16800 | RefActivation | 2.14 | 2.26 | DataActivation |
| AT2G43010 | AT1G71960 | RefActivation | 2.14 | 2.23 | DataActivation |
| AT2G43010 | AT1G70940 | RefActivation | 2.14 | 2.23 | DataActivation |
| AT2G43010 | AT1G03610 | RefActivation | 2.14 | 2.23 | DataActivation |
| AT2G43010 | AT4G16780 | RefActivation | 2.14 | 2.22 | DataActivation |
| AT2G43010 | AT2G41110 | RefActivation | 2.14 | 2.21 | DataActivation |
| AT2G43010 | AT5G01445 | RefActivation | 2.14 | 2.20 | DataActivation |
| AT2G43010 | AT5G23870 | RefActivation | 2.14 | 2.17 | DataActivation |
| AT2G43010 | AT5G57660 | RefActivation | 2.14 | 2.15 | DataActivation |
| AT2G43010 | AT2G13650 | RefActivation | 2.14 | 2.14 | DataActivation |
| AT2G43010 | AT1G26270 | RefActivation | 2.14 | 2.09 | DataActivation |
| AT2G43010 | AT1G09250 | RefActivation | 2.14 | 2.04 | DataActivation |
| AT2G43010 | AT5G56980 | RefActivation | 2.14 | 2.02 | DataActivation |
| AT2G43010 | AT5G22740 | RefActivation | 2.14 | 1.97 | DataActivation |
| AT2G43010 | AT3G23030 | RefActivation | 2.14 | 1.95 | DataActivation |
| AT2G43010 | AT1G62380 | RefActivation | 2.14 | 1.90 | DataActivation |
| AT2G43010 | AT2G41630 | RefActivation | 2.14 | 1.84 | DataActivation |
| AT2G43010 | AT5G11970 | RefActivation | 2.14 | 1.83 | DataActivation |
| AT2G43010 | AT3G05910 | RefActivation | 2.14 | 1.83 | DataActivation |
| AT2G43010 | AT2G41310 | RefActivation | 2.14 | 1.82 | DataActivation |
| AT2G43010 | AT2G36320 | RefActivation | 2.14 | 1.79 | DataActivation |
| AT2G43010 | AT5G55960 | RefActivation | 2.14 | 0.58 | DataRepression |
| AT2G43010 | AT3G15020 | RefActivation | 2.14 | 0.54 | DataRepression |
| AT2G43010 | AT1G44170 | RefActivation | 2.14 | 0.53 | DataRepression |
| AT2G43010 | AT1G69690 | RefActivation | 2.14 | 0.52 | DataRepression |
| AT2G43010 | AT1G11440 | RefActivation | 2.14 | 0.51 | DataRepression |
| AT2G43010 | AT5G65140 | RefActivation | 2.14 | 0.49 | DataRepression |
| AT2G43010 | AT3G01750 | RefActivation | 2.14 | 0.48 | DataRepression |
| AT2G43010 | AT1G01320 | RefActivation | 2.14 | 0.48 | DataRepression |
| AT2G43010 | AT3G26520 | RefActivation | 2.14 | 0.46 | DataRepression |
| AT2G43010 | AT1G10060 | RefActivation | 2.14 | 0.45 | DataRepression |
| AT2G43010 | AT2G16365 | RefActivation | 2.14 | 0.43 | DataRepression |
| AT2G43010 | AT3G61820 | RefActivation | 2.14 | 0.42 | DataRepression |
| AT2G43010 | AT4G17695 | RefActivation | 2.14 | 0.41 | DataRepression |
| AT2G43010 | AT5G27220 | RefActivation | 2.14 | 0.40 | DataRepression |

|           |           |               |      |      |                |
|-----------|-----------|---------------|------|------|----------------|
| AT2G43010 | AT3G15030 | RefActivation | 2.14 | 0.39 | DataRepression |
| AT2G43010 | AT3G29575 | RefActivation | 2.14 | 0.38 | DataRepression |
| AT2G43010 | AT3G61680 | RefActivation | 2.14 | 0.33 | DataRepression |
| AT2G43010 | AT5G01790 | RefActivation | 2.14 | 0.32 | DataRepression |
| AT2G43010 | AT5G63350 | RefActivation | 2.14 | 0.32 | DataRepression |
| AT2G43010 | AT1G32090 | RefActivation | 2.14 | 0.31 | DataRepression |
| AT2G43010 | AT5G02260 | RefActivation | 2.14 | 0.30 | DataRepression |
| AT2G43010 | AT5G47240 | RefActivation | 2.14 | 0.29 | DataRepression |
| AT2G43010 | AT1G69526 | RefActivation | 2.14 | 0.29 | DataRepression |
| AT2G43010 | AT5G46240 | RefActivation | 2.14 | 0.29 | DataRepression |
| AT2G43010 | AT1G16850 | RefActivation | 2.14 | 0.29 | DataRepression |
| AT2G43010 | AT3G05880 | RefActivation | 2.14 | 0.24 | DataRepression |
| AT2G43010 | AT4G36010 | RefActivation | 2.14 | 0.24 | DataRepression |
| AT2G43010 | AT1G52890 | RefActivation | 2.14 | 0.24 | DataRepression |
| AT2G43010 | AT2G19450 | RefActivation | 2.14 | 0.23 | DataRepression |
| AT2G43010 | AT1G29395 | RefActivation | 2.14 | 0.18 | DataRepression |
| AT2G43010 | AT4G19120 | RefActivation | 2.14 | 0.15 | DataRepression |
| AT2G43010 | AT4G30650 | RefActivation | 2.14 | 0.15 | DataRepression |
| AT2G43010 | AT1G08500 | RefActivation | 2.14 | 0.13 | DataRepression |
| AT2G43010 | AT2G21660 | RefActivation | 2.14 | 0.11 | DataRepression |
| AT2G43010 | AT2G06200 | RefActivation | 2.14 | 0.11 | DataRepression |
| AT2G43010 | AT5G59490 | RefActivation | 2.14 | 0.10 | DataRepression |
| AT2G43010 | AT4G22490 | RefActivation | 2.14 | 0.09 | DataRepression |
| AT2G43010 | AT1G20070 | RefActivation | 2.14 | 0.07 | DataRepression |
| AT2G43010 | AT3G20810 | RefActivation | 2.14 | 0.05 | DataRepression |
| AT2G43010 | AT5G39240 | RefActivation | 2.14 | 0.05 | DataRepression |
| AT2G43010 | AT4G33467 | RefActivation | 2.14 | 0.05 | DataRepression |
| AT2G43010 | AT5G48250 | RefActivation | 2.14 | 0.04 | DataRepression |
| AT2G43010 | AT1G73120 | RefActivation | 2.14 | 0.00 | DataRepression |
| AT2G43010 | AT3G14880 | RefActivation | 2.14 | 0.00 | DataRepression |
| AT2G43010 | AT4G13790 | RefActivation | 2.14 | 0.00 | DataRepression |
| AT2G27050 | AT3G23240 | RefActivation | 2.00 | >=6  | DataActivation |
| AT2G20180 | AT1G75490 | RefActivation | 1.75 | >=6  | DataActivation |
| AT2G20180 | AT4G33800 | RefActivation | 1.75 | >=6  | DataActivation |
| AT2G20180 | AT5G06980 | RefActivation | 1.75 | >=6  | DataActivation |
| AT2G20180 | AT5G07010 | RefActivation | 1.75 | >=6  | DataActivation |
| AT2G20180 | AT1G76990 | RefActivation | 1.75 | 3.21 | DataActivation |
| AT2G20180 | AT4G24110 | RefActivation | 1.75 | 2.98 | DataActivation |
| AT2G20180 | AT2G46270 | RefActivation | 1.75 | 2.80 | DataActivation |
| AT2G20180 | AT5G58350 | RefActivation | 1.75 | 2.73 | DataActivation |
| AT2G20180 | AT4G37550 | RefActivation | 1.75 | 2.57 | DataActivation |
| AT2G20180 | AT5G58650 | RefActivation | 1.75 | 2.33 | DataActivation |
| AT2G20180 | AT1G03610 | RefActivation | 1.75 | 2.23 | DataActivation |
| AT2G20180 | AT1G09570 | RefActivation | 1.75 | 1.73 | DataActivation |
| AT2G20180 | AT1G04120 | RefActivation | 1.75 | 0.51 | DataRepression |
| AT2G20180 | AT3G05120 | RefActivation | 1.75 | 0.47 | DataRepression |
| AT2G20180 | AT1G16850 | RefActivation | 1.75 | 0.29 | DataRepression |
| AT2G20180 | AT1G22770 | RefActivation | 1.75 | 0.28 | DataRepression |
| AT2G20180 | AT1G27990 | RefActivation | 1.75 | 0.22 | DataRepression |
| AT2G20180 | AT1G62290 | RefActivation | 1.75 | 0.21 | DataRepression |
| AT2G20180 | AT2G38465 | RefActivation | 1.75 | 0.11 | DataRepression |
| AT4G18960 | AT1G73830 | RefActivation | 0.45 | >=6  | DataRepression |

|           |           |               |      |      |                |
|-----------|-----------|---------------|------|------|----------------|
| AT4G18960 | AT1G15550 | RefActivation | 0.45 | 5.02 | DataRepression |
| AT4G18960 | AT4G22950 | RefActivation | 0.45 | 2.85 | DataRepression |
| AT4G18960 | AT2G02710 | RefActivation | 0.45 | 2.21 | DataRepression |
| AT4G18960 | AT1G24260 | RefActivation | 0.45 | 0.02 | DataActivation |
| AT4G18960 | AT4G36740 | RefActivation | 0.45 | 0.00 | DataActivation |
| AT3G24520 | AT2G47180 | RefActivation | 0.32 | >=6  | DataRepression |
| AT5G41315 | AT3G50800 | RefActivation | 0.15 | 3.82 | DataRepression |
| AT5G41315 | AT4G00480 | RefActivation | 0.15 | 3.26 | DataRepression |
| AT5G41315 | AT2G26250 | RefActivation | 0.15 | 1.77 | DataRepression |
| AT5G15840 | AT1G65480 | RefActivation | 0.11 | 0.10 | DataActivation |
| AT1G24260 | AT4G18960 | RefActivation | 0.02 | 0.45 | DataActivation |
| AT1G24260 | AT5G60910 | RefActivation | 0.02 | 0.38 | DataActivation |
| AT1G24260 | AT5G15800 | RefActivation | 0.02 | 0.04 | DataActivation |
| AT2G43000 | AT1G15550 | RefRepression | >=6  | 5.02 | DataActivation |
| AT3G55560 | AT1G15550 | RefRepression | >=6  | 5.02 | DataActivation |
| AT2G43000 | AT2G20180 | RefRepression | >=6  | 1.75 | DataActivation |
| AT1G01060 | AT5G61380 | RefRepression | >=6  | 0.18 | DataRepression |
| AT2G46830 | AT5G61380 | RefRepression | >=6  | 0.18 | DataRepression |
| AT2G46830 | AT5G24470 | RefRepression | >=6  | 0.06 | DataRepression |
| AT1G01060 | AT2G40080 | RefRepression | >=6  | 0.03 | DataRepression |
| AT2G46830 | AT2G40080 | RefRepression | >=6  | 0.03 | DataRepression |
| AT2G44745 | AT2G46770 | RefRepression | 3.54 | >=6  | DataActivation |
| AT2G43010 | AT1G01060 | RefRepression | 2.14 | >=6  | DataActivation |
| AT2G43010 | AT1G10070 | RefRepression | 2.14 | >=6  | DataActivation |
| AT2G43010 | AT1G34580 | RefRepression | 2.14 | >=6  | DataActivation |
| AT2G43010 | AT1G68840 | RefRepression | 2.14 | >=6  | DataActivation |
| AT2G43010 | AT1G69160 | RefRepression | 2.14 | >=6  | DataActivation |
| AT2G43010 | AT1G75830 | RefRepression | 2.14 | >=6  | DataActivation |
| AT2G43010 | AT2G37030 | RefRepression | 2.14 | >=6  | DataActivation |
| AT2G43010 | AT2G43000 | RefRepression | 2.14 | >=6  | DataActivation |
| AT2G43010 | AT2G43140 | RefRepression | 2.14 | >=6  | DataActivation |
| AT2G43010 | AT2G46830 | RefRepression | 2.14 | >=6  | DataActivation |
| AT2G43010 | AT3G12320 | RefRepression | 2.14 | >=6  | DataActivation |
| AT2G43010 | AT3G55240 | RefRepression | 2.14 | >=6  | DataActivation |
| AT2G43010 | AT4G02380 | RefRepression | 2.14 | >=6  | DataActivation |
| AT2G43010 | AT4G11320 | RefRepression | 2.14 | >=6  | DataActivation |
| AT2G43010 | AT4G27300 | RefRepression | 2.14 | >=6  | DataActivation |
| AT2G43010 | AT4G37810 | RefRepression | 2.14 | >=6  | DataActivation |
| AT2G43010 | AT5G04190 | RefRepression | 2.14 | >=6  | DataActivation |
| AT2G43010 | AT5G04530 | RefRepression | 2.14 | >=6  | DataActivation |
| AT2G43010 | AT5G06980 | RefRepression | 2.14 | >=6  | DataActivation |
| AT2G43010 | AT5G48540 | RefRepression | 2.14 | >=6  | DataActivation |
| AT2G43010 | AT2G20670 | RefRepression | 2.14 | 5.98 | DataActivation |
| AT2G43010 | AT1G14870 | RefRepression | 2.14 | 5.96 | DataActivation |
| AT2G43010 | AT5G03350 | RefRepression | 2.14 | 5.39 | DataActivation |
| AT2G43010 | AT2G28190 | RefRepression | 2.14 | 5.35 | DataActivation |
| AT2G43010 | AT2G30520 | RefRepression | 2.14 | 5.25 | DataActivation |
| AT2G43010 | AT2G30010 | RefRepression | 2.14 | 5.06 | DataActivation |
| AT2G43010 | AT3G54990 | RefRepression | 2.14 | 4.96 | DataActivation |
| AT2G43010 | AT2G46220 | RefRepression | 2.14 | 4.89 | DataActivation |
| AT2G43010 | AT2G25470 | RefRepression | 2.14 | 4.54 | DataActivation |
| AT2G43010 | AT1G21130 | RefRepression | 2.14 | 4.49 | DataActivation |



|           |           |               |      |      |                |
|-----------|-----------|---------------|------|------|----------------|
| AT2G43010 | AT2G46790 | RefRepression | 2.14 | 4.46 | DataActivation |
| AT2G43010 | AT4G25990 | RefRepression | 2.14 | 4.46 | DataActivation |
| AT2G43010 | AT1G15010 | RefRepression | 2.14 | 4.44 | DataActivation |
| AT2G43010 | AT2G41100 | RefRepression | 2.14 | 4.35 | DataActivation |
| AT2G43010 | AT5G01740 | RefRepression | 2.14 | 4.20 | DataActivation |
| AT2G43010 | AT4G25070 | RefRepression | 2.14 | 4.15 | DataActivation |
| AT2G43010 | AT2G28940 | RefRepression | 2.14 | 4.12 | DataActivation |
| AT2G43010 | AT5G21482 | RefRepression | 2.14 | 3.91 | DataActivation |
| AT2G43010 | AT5G52570 | RefRepression | 2.14 | 3.62 | DataActivation |
| AT2G43010 | AT1G14185 | RefRepression | 2.14 | 3.38 | DataActivation |
| AT2G43010 | AT2G42690 | RefRepression | 2.14 | 3.32 | DataActivation |
| AT2G43010 | AT4G19420 | RefRepression | 2.14 | 3.31 | DataActivation |
| AT2G43010 | AT1G79760 | RefRepression | 2.14 | 3.30 | DataActivation |
| AT2G43010 | AT5G57010 | RefRepression | 2.14 | 3.28 | DataActivation |
| AT2G43010 | AT1G25510 | RefRepression | 2.14 | 3.26 | DataActivation |
| AT2G43010 | AT2G41880 | RefRepression | 2.14 | 3.25 | DataActivation |
| AT2G43010 | AT1G59920 | RefRepression | 2.14 | 3.25 | DataActivation |
| AT2G43010 | AT1G18570 | RefRepression | 2.14 | 3.09 | DataActivation |
| AT2G43010 | AT2G44670 | RefRepression | 2.14 | 3.06 | DataActivation |
| AT2G43010 | AT3G17510 | RefRepression | 2.14 | 3.05 | DataActivation |
| AT2G43010 | AT3G54500 | RefRepression | 2.14 | 3.01 | DataActivation |
| AT2G43010 | AT5G51460 | RefRepression | 2.14 | 2.97 | DataActivation |
| AT2G43010 | AT2G18700 | RefRepression | 2.14 | 2.97 | DataActivation |
| AT2G43010 | AT4G17245 | RefRepression | 2.14 | 2.88 | DataActivation |
| AT2G43010 | AT2G03530 | RefRepression | 2.14 | 2.83 | DataActivation |
| AT2G43010 | AT2G39700 | RefRepression | 2.14 | 2.77 | DataActivation |
| AT2G43010 | AT3G06080 | RefRepression | 2.14 | 2.77 | DataActivation |
| AT2G43010 | AT1G32190 | RefRepression | 2.14 | 2.63 | DataActivation |
| AT2G43010 | AT2G37940 | RefRepression | 2.14 | 2.59 | DataActivation |
| AT2G43010 | AT5G22920 | RefRepression | 2.14 | 2.58 | DataActivation |
| AT2G43010 | AT4G37550 | RefRepression | 2.14 | 2.57 | DataActivation |
| AT2G43010 | AT2G22330 | RefRepression | 2.14 | 2.56 | DataActivation |
| AT2G43010 | AT1G22650 | RefRepression | 2.14 | 2.44 | DataActivation |
| AT2G43010 | AT3G50750 | RefRepression | 2.14 | 2.41 | DataActivation |
| AT2G43010 | AT1G25275 | RefRepression | 2.14 | 2.38 | DataActivation |
| AT2G43010 | AT1G06570 | RefRepression | 2.14 | 2.37 | DataActivation |
| AT2G43010 | AT1G03180 | RefRepression | 2.14 | 2.27 | DataActivation |
| AT2G43010 | AT2G22990 | RefRepression | 2.14 | 2.22 | DataActivation |
| AT2G43010 | AT3G14020 | RefRepression | 2.14 | 2.16 | DataActivation |
| AT2G43010 | AT2G41090 | RefRepression | 2.14 | 2.16 | DataActivation |
| AT2G43010 | AT4G36220 | RefRepression | 2.14 | 2.09 | DataActivation |
| AT2G43010 | AT4G01330 | RefRepression | 2.14 | 2.07 | DataActivation |
| AT2G43010 | AT2G16280 | RefRepression | 2.14 | 2.06 | DataActivation |
| AT2G43010 | AT4G23250 | RefRepression | 2.14 | 2.03 | DataActivation |
| AT2G43010 | AT2G40700 | RefRepression | 2.14 | 2.00 | DataActivation |
| AT2G43010 | AT4G16990 | RefRepression | 2.14 | 1.99 | DataActivation |
| AT2G43010 | AT1G50460 | RefRepression | 2.14 | 1.98 | DataActivation |
| AT2G43010 | AT1G23020 | RefRepression | 2.14 | 1.92 | DataActivation |
| AT2G43010 | AT4G11330 | RefRepression | 2.14 | 1.92 | DataActivation |
| AT2G43010 | AT4G30490 | RefRepression | 2.14 | 1.92 | DataActivation |
| AT2G43010 | AT3G21270 | RefRepression | 2.14 | 1.82 | DataActivation |
| AT2G43010 | AT2G24790 | RefRepression | 2.14 | 1.81 | DataActivation |

|           |           |               |      |      |                |
|-----------|-----------|---------------|------|------|----------------|
| AT2G43010 | AT2G43910 | RefRepression | 2.14 | 1.80 | DataActivation |
| AT2G43010 | AT2G35260 | RefRepression | 2.14 | 1.69 | DataActivation |
| AT2G43010 | AT2G20725 | RefRepression | 2.14 | 1.65 | DataActivation |
| AT2G43010 | AT1G17220 | RefRepression | 2.14 | 0.55 | DataRepression |
| AT2G43010 | AT3G60380 | RefRepression | 2.14 | 0.54 | DataRepression |
| AT2G43010 | AT3G02830 | RefRepression | 2.14 | 0.53 | DataRepression |
| AT2G43010 | AT1G63670 | RefRepression | 2.14 | 0.48 | DataRepression |
| AT2G43010 | AT1G01320 | RefRepression | 2.14 | 0.48 | DataRepression |
| AT2G43010 | AT4G28660 | RefRepression | 2.14 | 0.47 | DataRepression |
| AT2G43010 | AT5G24000 | RefRepression | 2.14 | 0.46 | DataRepression |
| AT2G43010 | AT1G55550 | RefRepression | 2.14 | 0.46 | DataRepression |
| AT2G43010 | AT1G75460 | RefRepression | 2.14 | 0.45 | DataRepression |
| AT2G43010 | AT1G14345 | RefRepression | 2.14 | 0.44 | DataRepression |
| AT2G43010 | AT1G25440 | RefRepression | 2.14 | 0.43 | DataRepression |
| AT2G43010 | AT4G27520 | RefRepression | 2.14 | 0.42 | DataRepression |
| AT2G43010 | AT3G05625 | RefRepression | 2.14 | 0.42 | DataRepression |
| AT2G43010 | AT3G15030 | RefRepression | 2.14 | 0.39 | DataRepression |
| AT2G43010 | AT4G37800 | RefRepression | 2.14 | 0.38 | DataRepression |
| AT2G43010 | AT2G21210 | RefRepression | 2.14 | 0.38 | DataRepression |
| AT2G43010 | AT1G10960 | RefRepression | 2.14 | 0.36 | DataRepression |
| AT2G43010 | AT1G01580 | RefRepression | 2.14 | 0.34 | DataRepression |
| AT2G43010 | AT5G38510 | RefRepression | 2.14 | 0.33 | DataRepression |
| AT2G43010 | AT4G18240 | RefRepression | 2.14 | 0.31 | DataRepression |
| AT2G43010 | AT5G13730 | RefRepression | 2.14 | 0.29 | DataRepression |
| AT2G43010 | AT5G46240 | RefRepression | 2.14 | 0.29 | DataRepression |
| AT2G43010 | AT5G39210 | RefRepression | 2.14 | 0.28 | DataRepression |
| AT2G43010 | AT1G73600 | RefRepression | 2.14 | 0.27 | DataRepression |
| AT2G43010 | AT2G18193 | RefRepression | 2.14 | 0.27 | DataRepression |
| AT2G43010 | AT4G04330 | RefRepression | 2.14 | 0.18 | DataRepression |
| AT2G43010 | AT1G49220 | RefRepression | 2.14 | 0.18 | DataRepression |
| AT2G43010 | AT5G62360 | RefRepression | 2.14 | 0.14 | DataRepression |
| AT2G43010 | AT3G15720 | RefRepression | 2.14 | 0.12 | DataRepression |
| AT2G43010 | AT1G09350 | RefRepression | 2.14 | 0.11 | DataRepression |
| AT2G43010 | AT3G20810 | RefRepression | 2.14 | 0.05 | DataRepression |
| AT2G43010 | AT1G24260 | RefRepression | 2.14 | 0.02 | DataRepression |
| AT2G43010 | AT5G20630 | RefRepression | 2.14 | 0.00 | DataRepression |
| AT2G43010 | AT1G75430 | RefRepression | 2.14 | 0.00 | DataRepression |
| AT2G43010 | AT3G28650 | RefRepression | 2.14 | 0.00 | DataRepression |
| AT2G43010 | AT5G54280 | RefRepression | 2.14 | 0.00 | DataRepression |
| AT2G20180 | AT1G03850 | RefRepression | 1.75 | >=6  | DataActivation |
| AT2G20180 | AT2G43000 | RefRepression | 1.75 | >=6  | DataActivation |
| AT2G20180 | AT4G17460 | RefRepression | 1.75 | 2.98 | DataActivation |
| AT2G20180 | AT2G27500 | RefRepression | 1.75 | 2.68 | DataActivation |
| AT2G20180 | AT1G26270 | RefRepression | 1.75 | 2.09 | DataActivation |
| AT2G20180 | AT1G31240 | RefRepression | 1.75 | 0.30 | DataRepression |
| AT2G20180 | AT1G52890 | RefRepression | 1.75 | 0.24 | DataRepression |
| AT5G02030 | AT4G18960 | RefRepression | 0.37 | 0.45 | DataActivation |

| TF(Trisomy3) | Target gene | Relation (AtRegNet) | Ratio(TF) | Ratio(target) | Relation (Data) |
|--------------|-------------|---------------------|-----------|---------------|-----------------|
| AT5G11260    | AT4G17500   | RefActivation       | 2.71      | >=6           | DataActivation  |
| AT5G11260    | AT4G34410   | RefActivation       | 2.71      | >=6           | DataActivation  |
| AT5G11260    | AT4G31870   | RefActivation       | 2.71      | >=6           | DataActivation  |
| AT5G11260    | AT3G51240   | RefActivation       | 2.71      | >=6           | DataActivation  |
| AT5G11260    | AT1G17380   | RefActivation       | 2.71      | >=6           | DataActivation  |
| AT5G11260    | AT1G68620   | RefActivation       | 2.71      | >=6           | DataActivation  |
| AT5G11260    | AT3G46080   | RefActivation       | 2.71      | >=6           | DataActivation  |
| AT3G23210    | AT5G04150   | RefActivation       | 2.52      | >=6           | DataActivation  |
| AT3G23210    | AT3G56970   | RefActivation       | 2.52      | >=6           | DataActivation  |
| AT3G23210    | AT3G56980   | RefActivation       | 2.52      | >=6           | DataActivation  |
| AT3G23210    | AT2G41240   | RefActivation       | 2.52      | >=6           | DataActivation  |
| AT5G08520    | AT4G27410   | RefActivation       | 0.52      | >=6           | DataRepression  |
| AT5G08520    | AT1G52890   | RefActivation       | 0.52      | >=6           | DataRepression  |
| AT4G36920    | AT1G29270   | RefActivation       | 0.34      | >=6           | DataRepression  |
| AT4G36920    | AT2G14210   | RefActivation       | 0.34      | >=6           | DataRepression  |
| AT4G36920    | AT3G12320   | RefActivation       | 0.34      | >=6           | DataRepression  |
| AT4G36920    | AT5G49360   | RefActivation       | 0.34      | >=6           | DataRepression  |
| AT2G22430    | AT1G74930   | RefActivation       | 0.32      | >=6           | DataRepression  |
| AT4G23810    | AT4G35090   | RefActivation       | 0.09      | >=6           | DataRepression  |
| AT4G23810    | AT5G45890   | RefActivation       | 0.09      | >=6           | DataRepression  |
| AT1G32770    | AT5G64530   | RefActivation       | 0.00      | >=6           | DataRepression  |
| AT1G32770    | AT1G16420   | RefActivation       | 0.00      | >=6           | DataRepression  |
| AT5G12870    | AT2G28200   | RefActivation       | 0.15      | 5.71          | DataRepression  |
| AT4G36920    | AT2G40435   | RefActivation       | 0.34      | 5.26          | DataRepression  |
| AT5G12870    | AT5G53200   | RefActivation       | 0.15      | 4.24          | DataRepression  |
| AT3G08500    | AT5G53200   | RefActivation       | 0.09      | 4.24          | DataRepression  |
| AT5G11260    | AT5G45820   | RefActivation       | 2.71      | 4.13          | DataActivation  |
| AT5G12870    | AT3G45010   | RefActivation       | 0.15      | 4.13          | DataRepression  |
| AT5G15840    | AT3G55610   | RefActivation       | 0.14      | 3.96          | DataRepression  |
| AT5G11260    | AT1G19180   | RefActivation       | 2.71      | 3.80          | DataActivation  |
| AT4G36920    | AT3G05690   | RefActivation       | 0.34      | 3.73          | DataRepression  |
| AT5G12870    | AT2G22850   | RefActivation       | 0.15      | 3.61          | DataRepression  |
| AT3G08500    | AT2G22850   | RefActivation       | 0.09      | 3.61          | DataRepression  |
| AT5G11260    | AT5G01550   | RefActivation       | 2.71      | 3.61          | DataActivation  |
| AT4G36920    | AT5G54470   | RefActivation       | 0.34      | 3.61          | DataRepression  |
| AT5G12870    | AT2G16720   | RefActivation       | 0.15      | 3.55          | DataRepression  |
| AT3G08500    | AT2G16720   | RefActivation       | 0.09      | 3.55          | DataRepression  |
| AT2G27050    | AT3G23240   | RefActivation       | 0.53      | 3.49          | DataRepression  |
| AT5G11260    | AT4G27310   | RefActivation       | 2.71      | 3.43          | DataActivation  |
| AT5G11260    | AT1G09480   | RefActivation       | 2.71      | 3.29          | DataActivation  |
| AT5G15840    | AT1G62960   | RefActivation       | 0.14      | 3.29          | DataRepression  |
| AT4G36920    | AT5G06530   | RefActivation       | 0.34      | 3.21          | DataRepression  |
| AT5G12870    | AT3G19450   | RefActivation       | 0.15      | 2.95          | DataRepression  |
| AT3G08500    | AT3G19450   | RefActivation       | 0.09      | 2.95          | DataRepression  |
| AT5G12870    | AT1G75410   | RefActivation       | 0.15      | 2.57          | DataRepression  |
| AT3G08500    | AT1G75410   | RefActivation       | 0.09      | 2.57          | DataRepression  |
| AT5G11260    | AT4G36040   | RefActivation       | 2.71      | 2.50          | DataActivation  |
| AT5G11260    | AT2G29670   | RefActivation       | 2.71      | 2.43          | DataActivation  |
| AT4G36920    | AT3G16650   | RefActivation       | 0.34      | 2.31          | DataRepression  |
| AT5G12870    | AT1G19700   | RefActivation       | 0.15      | 2.31          | DataRepression  |
| AT3G08500    | AT1G19700   | RefActivation       | 0.09      | 2.31          | DataRepression  |

|           |           |               |      |      |                |
|-----------|-----------|---------------|------|------|----------------|
| AT5G11260 | AT5G02270 | RefActivation | 2.71 | 2.17 | DataActivation |
| AT4G36920 | AT4G28560 | RefActivation | 0.34 | 2.06 | DataRepression |
| AT4G36920 | AT2G45660 | RefActivation | 0.34 | 2.06 | DataRepression |
| AT5G15840 | AT2G45660 | RefActivation | 0.14 | 2.06 | DataRepression |
| AT5G11260 | AT1G57770 | RefActivation | 2.71 | 1.98 | DataActivation |
| AT1G19350 | AT4G39350 | RefActivation | 0.42 | 0.57 | DataActivation |
| AT4G36920 | AT1G69295 | RefActivation | 0.34 | 0.57 | DataActivation |
| AT1G19350 | AT5G05170 | RefActivation | 0.42 | 0.52 | DataActivation |
| AT1G32770 | AT1G27440 | RefActivation | 0.00 | 0.50 | DataActivation |
| AT4G36920 | AT3G19370 | RefActivation | 0.34 | 0.50 | DataActivation |
| AT1G19350 | AT4G32410 | RefActivation | 0.42 | 0.49 | DataActivation |
| AT5G35550 | AT3G26790 | RefActivation | 0.09 | 0.41 | DataActivation |
| AT4G36920 | AT5G64640 | RefActivation | 0.34 | 0.41 | DataActivation |
| AT5G12870 | AT5G67230 | RefActivation | 0.15 | 0.40 | DataActivation |
| AT3G08500 | AT5G67230 | RefActivation | 0.09 | 0.40 | DataActivation |
| AT1G32770 | AT5G67230 | RefActivation | 0.00 | 0.40 | DataActivation |
| AT1G19350 | AT5G64740 | RefActivation | 0.42 | 0.40 | DataActivation |
| AT5G12870 | AT5G59290 | RefActivation | 0.15 | 0.40 | DataActivation |
| AT3G08500 | AT5G59290 | RefActivation | 0.09 | 0.40 | DataActivation |
| AT1G32770 | AT5G59290 | RefActivation | 0.00 | 0.40 | DataActivation |
| AT4G36920 | AT1G66350 | RefActivation | 0.34 | 0.39 | DataActivation |
| AT4G36920 | AT4G00730 | RefActivation | 0.34 | 0.38 | DataActivation |
| AT4G36920 | AT1G70560 | RefActivation | 0.34 | 0.38 | DataActivation |
| AT5G11260 | AT5G66210 | RefActivation | 2.71 | 0.36 | DataRepression |
| AT5G11260 | AT5G62180 | RefActivation | 2.71 | 0.33 | DataRepression |
| AT1G32770 | AT1G19300 | RefActivation | 0.00 | 0.33 | DataActivation |
| AT4G23810 | AT1G20620 | RefActivation | 0.09 | 0.33 | DataActivation |
| AT1G32770 | AT1G70500 | RefActivation | 0.00 | 0.31 | DataActivation |
| AT4G36920 | AT2G38970 | RefActivation | 0.34 | 0.30 | DataActivation |
| AT1G32770 | AT1G50010 | RefActivation | 0.00 | 0.28 | DataActivation |
| AT5G11260 | AT3G13600 | RefActivation | 2.71 | 0.27 | DataRepression |
| AT4G36920 | AT4G17670 | RefActivation | 0.34 | 0.27 | DataActivation |
| AT1G32770 | AT2G28760 | RefActivation | 0.00 | 0.27 | DataActivation |
| AT4G27410 | AT1G02850 | RefActivation | >=6  | 0.27 | DataRepression |
| AT5G62380 | AT1G20850 | RefActivation | 0.12 | 0.27 | DataActivation |
| AT1G32770 | AT1G20850 | RefActivation | 0.00 | 0.27 | DataActivation |
| AT5G11260 | AT1G18570 | RefActivation | 2.71 | 0.27 | DataRepression |
| AT4G36920 | AT5G67180 | RefActivation | 0.34 | 0.26 | DataActivation |
| AT1G32770 | AT5G64060 | RefActivation | 0.00 | 0.26 | DataActivation |
| AT5G11260 | AT5G64660 | RefActivation | 2.71 | 0.26 | DataRepression |
| AT4G26150 | AT5G44030 | RefActivation | 3.98 | 0.25 | DataRepression |
| AT4G26150 | AT5G44030 | RefActivation | 3.98 | 0.25 | DataRepression |
| AT1G77570 | AT5G44030 | RefActivation | 2.29 | 0.25 | DataRepression |
| AT1G77570 | AT5G44030 | RefActivation | 2.29 | 0.25 | DataRepression |
| AT5G07580 | AT5G44030 | RefActivation | 0.52 | 0.25 | DataActivation |
| AT5G07580 | AT5G44030 | RefActivation | 0.52 | 0.25 | DataActivation |
| AT1G19350 | AT5G44030 | RefActivation | 0.42 | 0.25 | DataActivation |
| AT4G31550 | AT5G44030 | RefActivation | 0.40 | 0.25 | DataActivation |
| AT5G12870 | AT5G44030 | RefActivation | 0.15 | 0.25 | DataActivation |
| AT2G01430 | AT5G44030 | RefActivation | 0.09 | 0.25 | DataActivation |
| AT2G01430 | AT5G44030 | RefActivation | 0.09 | 0.25 | DataActivation |
| AT5G11260 | AT3G17130 | RefActivation | 2.71 | 0.24 | DataRepression |

|           |           |               |      |      |                |
|-----------|-----------|---------------|------|------|----------------|
| AT1G32770 | AT1G23460 | RefActivation | 0.00 | 0.24 | DataActivation |
| AT4G36920 | AT4G29190 | RefActivation | 0.34 | 0.23 | DataActivation |
| AT4G36920 | AT5G64870 | RefActivation | 0.34 | 0.23 | DataActivation |
| AT4G36920 | AT1G73590 | RefActivation | 0.34 | 0.22 | DataActivation |
| AT4G36920 | AT1G11730 | RefActivation | 0.34 | 0.22 | DataActivation |
| AT5G12870 | AT5G17420 | RefActivation | 0.15 | 0.21 | DataActivation |
| AT4G32730 | AT1G08560 | RefActivation | 0.48 | 0.21 | DataActivation |
| AT5G11510 | AT1G08560 | RefActivation | 0.25 | 0.21 | DataActivation |
| AT5G11260 | AT3G01830 | RefActivation | 2.71 | 0.20 | DataRepression |
| AT4G36920 | AT1G19330 | RefActivation | 0.34 | 0.20 | DataActivation |
| AT3G26790 | AT1G62290 | RefActivation | 0.41 | 0.20 | DataActivation |
| AT4G36920 | AT1G73805 | RefActivation | 0.34 | 0.20 | DataActivation |
| AT4G36920 | AT2G46530 | RefActivation | 0.34 | 0.19 | DataActivation |
| AT1G19350 | AT4G18780 | RefActivation | 0.42 | 0.18 | DataActivation |
| AT5G12870 | AT4G18780 | RefActivation | 0.15 | 0.18 | DataActivation |
| AT5G62380 | AT4G35350 | RefActivation | 0.12 | 0.18 | DataActivation |
| AT1G32770 | AT4G35350 | RefActivation | 0.00 | 0.18 | DataActivation |
| AT5G11260 | AT5G15510 | RefActivation | 2.71 | 0.17 | DataRepression |
| AT5G11260 | AT5G25810 | RefActivation | 2.71 | 0.15 | DataRepression |
| AT5G11260 | AT5G43890 | RefActivation | 2.71 | 0.15 | DataRepression |
| AT5G62380 | AT5G12870 | RefActivation | 0.12 | 0.15 | DataActivation |
| AT1G32770 | AT5G12870 | RefActivation | 0.00 | 0.15 | DataActivation |
| AT5G11260 | AT1G80850 | RefActivation | 2.71 | 0.14 | DataRepression |
| AT5G12870 | AT5G16600 | RefActivation | 0.15 | 0.14 | DataActivation |
| AT1G32770 | AT5G16600 | RefActivation | 0.00 | 0.14 | DataActivation |
| AT5G11260 | AT3G06160 | RefActivation | 2.71 | 0.14 | DataRepression |
| AT1G74930 | AT4G37770 | RefActivation | >=6  | 0.13 | DataRepression |
| AT5G11260 | AT4G37770 | RefActivation | 2.71 | 0.13 | DataRepression |
| AT4G36920 | AT4G25420 | RefActivation | 0.34 | 0.13 | DataActivation |
| AT5G11260 | AT4G32800 | RefActivation | 2.71 | 0.13 | DataRepression |
| AT5G11260 | AT1G12950 | RefActivation | 2.71 | 0.12 | DataRepression |
| AT4G36920 | AT3G25905 | RefActivation | 0.34 | 0.12 | DataActivation |
| AT5G11260 | AT2G42870 | RefActivation | 2.71 | 0.10 | DataRepression |
| AT4G36920 | AT2G42870 | RefActivation | 0.34 | 0.10 | DataActivation |
| AT5G11260 | AT3G19350 | RefActivation | 2.71 | 0.09 | DataRepression |
| AT5G62380 | AT3G08500 | RefActivation | 0.12 | 0.09 | DataActivation |
| AT1G32770 | AT3G08500 | RefActivation | 0.00 | 0.09 | DataActivation |
| AT4G36920 | AT2G41990 | RefActivation | 0.34 | 0.08 | DataActivation |
| AT5G11260 | AT5G65300 | RefActivation | 2.71 | 0.08 | DataRepression |
| AT5G11260 | AT2G35930 | RefActivation | 2.71 | 0.08 | DataRepression |
| AT5G11260 | AT2G47460 | RefActivation | 2.71 | 0.07 | DataRepression |
| AT5G62380 | AT1G01900 | RefActivation | 0.12 | 0.07 | DataActivation |
| AT4G36920 | AT5G49120 | RefActivation | 0.34 | 0.07 | DataActivation |
| AT5G11260 | AT3G60550 | RefActivation | 2.71 | 0.06 | DataRepression |
| AT4G27410 | AT4G19120 | RefActivation | >=6  | 0.05 | DataRepression |
| AT4G36920 | AT5G07030 | RefActivation | 0.34 | 0.05 | DataActivation |
| AT4G36920 | AT2G22170 | RefActivation | 0.34 | 0.04 | DataActivation |
| AT5G11260 | AT1G02810 | RefActivation | 2.71 | 0.04 | DataRepression |
| AT4G36920 | AT2G42800 | RefActivation | 0.34 | 0.04 | DataActivation |
| AT4G36920 | AT1G49230 | RefActivation | 0.34 | 0.04 | DataActivation |
| AT4G36920 | AT4G14130 | RefActivation | 0.34 | 0.03 | DataActivation |
| AT5G11260 | AT3G22830 | RefActivation | 2.71 | 0.03 | DataRepression |

|           |           |               |      |      |                |
|-----------|-----------|---------------|------|------|----------------|
| AT5G11260 | AT2G40080 | RefActivation | 2.71 | 0.02 | DataRepression |
| AT5G12870 | AT1G73410 | RefActivation | 0.15 | 0.00 | DataActivation |
| AT3G08500 | AT1G73410 | RefActivation | 0.09 | 0.00 | DataActivation |
| AT1G32770 | AT1G73410 | RefActivation | 0.00 | 0.00 | DataActivation |
| AT1G32640 | AT1G29930 | RefRepression | 3.69 | >=6  | DataActivation |
| AT5G11260 | AT1G13600 | RefRepression | 2.71 | >=6  | DataActivation |
| AT5G11260 | AT1G15380 | RefRepression | 2.71 | >=6  | DataActivation |
| AT5G11260 | AT3G21890 | RefRepression | 2.71 | >=6  | DataActivation |
| AT5G11260 | AT5G24140 | RefRepression | 2.71 | >=6  | DataActivation |
| AT5G11260 | AT5G01300 | RefRepression | 2.71 | >=6  | DataActivation |
| AT5G11260 | AT2G15020 | RefRepression | 2.71 | >=6  | DataActivation |
| AT4G36920 | AT3G55560 | RefRepression | 0.34 | >=6  | DataRepression |
| AT4G36920 | AT4G34410 | RefRepression | 0.34 | >=6  | DataRepression |
| AT5G08330 | AT2G46830 | RefRepression | 0.26 | >=6  | DataRepression |
| AT5G11260 | AT5G59780 | RefRepression | 2.71 | 5.64 | DataActivation |
| AT5G11260 | AT2G43570 | RefRepression | 2.71 | 5.34 | DataActivation |
| AT5G11260 | AT1G32450 | RefRepression | 2.71 | 5.32 | DataActivation |
| AT4G36920 | AT4G21870 | RefRepression | 0.34 | 4.86 | DataRepression |
| AT5G11260 | AT4G37230 | RefRepression | 2.71 | 3.79 | DataActivation |
| AT5G11260 | AT3G04140 | RefRepression | 2.71 | 3.68 | DataActivation |
| AT4G36920 | AT4G24050 | RefRepression | 0.34 | 3.45 | DataRepression |
| AT4G23810 | AT3G01080 | RefRepression | 0.09 | 3.05 | DataRepression |
| AT4G36920 | AT1G71030 | RefRepression | 0.34 | 2.92 | DataRepression |
| AT4G36920 | AT1G23390 | RefRepression | 0.34 | 2.41 | DataRepression |
| AT5G11260 | AT3G06080 | RefRepression | 2.71 | 2.35 | DataActivation |
| AT4G36920 | AT3G50270 | RefRepression | 0.34 | 2.19 | DataRepression |
| AT5G10140 | AT2G45660 | RefRepression | >=6  | 2.06 | DataActivation |
| AT4G36920 | AT2G45660 | RefRepression | 0.34 | 2.06 | DataRepression |
| AT5G11260 | AT4G32190 | RefRepression | 2.71 | 2.02 | DataActivation |
| AT5G11260 | AT1G27480 | RefRepression | 2.71 | 0.50 | DataRepression |
| AT4G36920 | AT1G75880 | RefRepression | 0.34 | 0.42 | DataActivation |
| AT4G36920 | AT4G27240 | RefRepression | 0.34 | 0.38 | DataActivation |
| AT4G36920 | AT5G14550 | RefRepression | 0.34 | 0.37 | DataActivation |
| AT5G11260 | AT2G38750 | RefRepression | 2.71 | 0.36 | DataRepression |
| AT5G11260 | AT1G10760 | RefRepression | 2.71 | 0.34 | DataRepression |
| AT4G36920 | AT4G02540 | RefRepression | 0.34 | 0.34 | DataActivation |
| AT4G36920 | AT1G22530 | RefRepression | 0.34 | 0.32 | DataActivation |
| AT5G11260 | AT2G29630 | RefRepression | 2.71 | 0.30 | DataRepression |
| AT4G36920 | AT1G07260 | RefRepression | 0.34 | 0.29 | DataActivation |
| AT5G11260 | AT4G35030 | RefRepression | 2.71 | 0.25 | DataRepression |
| AT4G36920 | AT2G25150 | RefRepression | 0.34 | 0.22 | DataActivation |
| AT2G02820 | AT3G54180 | RefRepression | 0.53 | 0.20 | DataActivation |
| AT4G36920 | AT5G15310 | RefRepression | 0.34 | 0.20 | DataActivation |
| AT4G36920 | AT2G26520 | RefRepression | 0.34 | 0.19 | DataActivation |
| AT2G46830 | AT5G61380 | RefRepression | >=6  | 0.19 | DataRepression |
| AT1G01060 | AT5G61380 | RefRepression | >=6  | 0.19 | DataRepression |
| AT4G36920 | AT1G71050 | RefRepression | 0.34 | 0.17 | DataActivation |
| AT4G36920 | AT4G24510 | RefRepression | 0.34 | 0.14 | DataActivation |
| AT4G36920 | AT3G12610 | RefRepression | 0.34 | 0.13 | DataActivation |
| AT4G36920 | AT3G43960 | RefRepression | 0.34 | 0.12 | DataActivation |
| AT4G36920 | AT5G44680 | RefRepression | 0.34 | 0.12 | DataActivation |
| AT4G36920 | AT5G62360 | RefRepression | 0.34 | 0.07 | DataActivation |

|           |           |               |      |      |                |
|-----------|-----------|---------------|------|------|----------------|
| AT5G11260 | AT1G16850 | RefRepression | 2.71 | 0.05 | DataRepression |
| AT5G11260 | AT3G07650 | RefRepression | 2.71 | 0.02 | DataRepression |
| AT2G46830 | AT2G40080 | RefRepression | >=6  | 0.02 | DataRepression |
| AT1G01060 | AT2G40080 | RefRepression | >=6  | 0.02 | DataRepression |
| AT4G36920 | AT5G02890 | RefRepression | 0.34 | 0.01 | DataActivation |
| AT5G11260 | AT5G45850 | RefRepression | 2.71 | 0.01 | DataRepression |
| AT4G36920 | AT1G51460 | RefRepression | 0.34 | 0.00 | DataActivation |
| AT4G36920 | AT1G04110 | RefRepression | 0.34 | 0.00 | DataActivation |
| AT4G36920 | AT2G18550 | RefRepression | 0.34 | 0.00 | DataActivation |

| TF(Trisomy4) | Target gene | Relation (AtRegNet) | Ratio(TF) | Ratio(target) | Relation (Data) |
|--------------|-------------|---------------------|-----------|---------------|-----------------|
| AT5G41315    | AT4G01060   | RefActivation       | >=6       | >=6           | DataActivation  |
| AT5G41315    | AT2G37260   | RefActivation       | >=6       | >=6           | DataActivation  |
| AT5G11260    | AT5G05270   | RefActivation       | 4.19      | >=6           | DataActivation  |
| AT5G11260    | AT3G51240   | RefActivation       | 4.19      | >=6           | DataActivation  |
| AT5G11260    | AT1G68620   | RefActivation       | 4.19      | >=6           | DataActivation  |
| AT5G11260    | AT5G13930   | RefActivation       | 4.19      | >=6           | DataActivation  |
| AT5G11260    | AT5G07990   | RefActivation       | 4.19      | >=6           | DataActivation  |
| AT5G11260    | AT5G42800   | RefActivation       | 4.19      | >=6           | DataActivation  |
| AT5G11260    | AT4G22880   | RefActivation       | 4.19      | >=6           | DataActivation  |
| AT4G36920    | AT1G02070   | RefActivation       | 2.75      | >=6           | DataActivation  |
| AT4G36920    | AT1G35730   | RefActivation       | 2.75      | >=6           | DataActivation  |
| AT4G36920    | AT3G12320   | RefActivation       | 2.75      | >=6           | DataActivation  |
| AT1G22070    | AT2G14610   | RefActivation       | 0.47      | >=6           | DataRepression  |
| AT4G18960    | AT1G73830   | RefActivation       | 0.37      | >=6           | DataRepression  |
| AT4G18960    | AT2G27550   | RefActivation       | 0.37      | >=6           | DataRepression  |
| AT4G18960    | AT2G31430   | RefActivation       | 0.37      | >=6           | DataRepression  |
| AT4G18960    | AT5G12000   | RefActivation       | 0.37      | >=6           | DataRepression  |
| AT4G18960    | AT5G35390   | RefActivation       | 0.37      | >=6           | DataRepression  |
| AT5G15840    | AT4G20370   | RefActivation       | 0.22      | >=6           | DataRepression  |
| AT4G23810    | AT4G35090   | RefActivation       | 0.17      | >=6           | DataRepression  |
| AT1G32770    | AT1G16420   | RefActivation       | 0.00      | >=6           | DataRepression  |
| AT2G25000    | AT2G19190   | RefActivation       | 2.97      | 6.00          | DataActivation  |
| AT4G18960    | AT5G39610   | RefActivation       | 0.37      | 5.80          | DataRepression  |
| AT5G11260    | AT4G31870   | RefActivation       | 4.19      | 5.52          | DataActivation  |
| AT1G24260    | AT5G13790   | RefActivation       | 0.10      | 5.31          | DataRepression  |
| AT5G41315    | AT1G79840   | RefActivation       | >=6       | 5.27          | DataActivation  |
| AT5G11260    | AT3G55120   | RefActivation       | 4.19      | 5.12          | DataActivation  |
| AT5G11260    | AT1G09480   | RefActivation       | 4.19      | 4.87          | DataActivation  |
| AT5G11260    | AT5G01550   | RefActivation       | 4.19      | 4.78          | DataActivation  |
| AT5G11260    | AT4G27310   | RefActivation       | 4.19      | 4.76          | DataActivation  |
| AT4G36920    | AT2G43620   | RefActivation       | 2.75      | 4.75          | DataActivation  |
| AT5G41315    | AT2G46410   | RefActivation       | >=6       | 4.22          | DataActivation  |
| AT4G36920    | AT4G25420   | RefActivation       | 2.75      | 3.87          | DataActivation  |
| AT4G36920    | AT1G19640   | RefActivation       | 2.75      | 3.72          | DataActivation  |
| AT4G18960    | AT4G32980   | RefActivation       | 0.37      | 3.47          | DataRepression  |
| AT4G36920    | AT3G05690   | RefActivation       | 2.75      | 3.41          | DataActivation  |
| AT5G11260    | AT3G05820   | RefActivation       | 4.19      | 3.36          | DataActivation  |
| AT4G18960    | AT1G15550   | RefActivation       | 0.37      | 3.23          | DataRepression  |
| AT4G36920    | AT5G06530   | RefActivation       | 2.75      | 2.91          | DataActivation  |
| AT1G32770    | AT5G64530   | RefActivation       | 0.00      | 2.78          | DataRepression  |
| AT5G15840    | AT1G62960   | RefActivation       | 0.22      | 2.78          | DataRepression  |
| AT1G32770    | AT4G34990   | RefActivation       | 0.00      | 2.78          | DataRepression  |
| AT4G36920    | AT4G16490   | RefActivation       | 2.75      | 2.74          | DataActivation  |
| AT5G11260    | AT2G44080   | RefActivation       | 4.19      | 2.62          | DataActivation  |
| AT5G11260    | AT3G17130   | RefActivation       | 4.19      | 2.52          | DataActivation  |
| AT5G13790    | AT4G38620   | RefActivation       | 5.31      | 2.49          | DataActivation  |
| AT5G11260    | AT4G13010   | RefActivation       | 4.19      | 2.48          | DataActivation  |
| AT5G13790    | AT5G48800   | RefActivation       | 5.31      | 2.37          | DataActivation  |
| AT4G36920    | AT1G50290   | RefActivation       | 2.75      | 2.32          | DataActivation  |
| AT4G36920    | AT5G67180   | RefActivation       | 2.75      | 2.30          | DataActivation  |
| AT4G36920    | AT1G03710   | RefActivation       | 2.75      | 2.26          | DataActivation  |



|           |           |               |      |      |                |
|-----------|-----------|---------------|------|------|----------------|
| AT4G36920 | AT2G15320 | RefActivation | 2.75 | 1.95 | DataActivation |
| AT4G36920 | AT4G30490 | RefActivation | 2.75 | 1.87 | DataActivation |
| AT2G38470 | AT4G04920 | RefActivation | 0.10 | 1.70 | DataRepression |
| AT5G41315 | AT2G30410 | RefActivation | >=6  | 0.57 | DataRepression |
| AT5G13790 | AT5G50180 | RefActivation | 5.31 | 0.56 | DataRepression |
| AT5G04340 | AT1G03980 | RefActivation | 0.16 | 0.55 | DataActivation |
| AT5G04340 | AT5G44070 | RefActivation | 0.16 | 0.47 | DataActivation |
| AT4G36920 | AT5G64640 | RefActivation | 2.75 | 0.44 | DataRepression |
| AT4G36920 | AT3G27770 | RefActivation | 2.75 | 0.43 | DataRepression |
| AT5G11260 | AT1G20510 | RefActivation | 4.19 | 0.43 | DataRepression |
| AT5G13790 | AT1G04030 | RefActivation | 5.31 | 0.42 | DataRepression |
| AT4G18960 | AT2G02710 | RefActivation | 0.37 | 0.40 | DataActivation |
| AT5G11260 | AT5G13700 | RefActivation | 4.19 | 0.40 | DataRepression |
| AT5G13790 | AT5G46910 | RefActivation | 5.31 | 0.39 | DataRepression |
| AT4G36920 | AT1G11050 | RefActivation | 2.75 | 0.39 | DataRepression |
| AT4G36920 | AT4G18960 | RefActivation | 2.75 | 0.37 | DataRepression |
| AT1G24260 | AT4G18960 | RefActivation | 0.10 | 0.37 | DataActivation |
| AT5G11260 | AT3G14440 | RefActivation | 4.19 | 0.37 | DataRepression |
| AT5G08520 | AT3G14440 | RefActivation | 0.33 | 0.37 | DataActivation |
| AT1G74930 | AT3G14440 | RefActivation | 0.04 | 0.37 | DataActivation |
| AT4G36920 | AT3G11820 | RefActivation | 2.75 | 0.37 | DataRepression |
| AT5G13790 | AT1G12780 | RefActivation | 5.31 | 0.36 | DataRepression |
| AT5G13790 | AT1G23000 | RefActivation | 5.31 | 0.36 | DataRepression |
| AT5G13790 | AT1G68670 | RefActivation | 5.31 | 0.34 | DataRepression |
| AT1G32770 | AT1G66810 | RefActivation | 0.00 | 0.34 | DataActivation |
| AT5G11260 | AT4G17500 | RefActivation | 4.19 | 0.34 | DataRepression |
| AT5G11260 | AT1G17420 | RefActivation | 4.19 | 0.33 | DataRepression |
| AT4G36920 | AT2G45660 | RefActivation | 2.75 | 0.33 | DataRepression |
| AT5G15840 | AT2G45660 | RefActivation | 0.22 | 0.33 | DataActivation |
| AT5G11260 | AT4G34150 | RefActivation | 4.19 | 0.31 | DataRepression |
| AT4G36920 | AT5G58900 | RefActivation | 2.75 | 0.31 | DataRepression |
| AT5G08520 | AT1G52890 | RefActivation | 0.33 | 0.30 | DataActivation |
| AT5G04340 | AT5G27380 | RefActivation | 0.16 | 0.28 | DataActivation |
| AT5G11260 | AT1G24140 | RefActivation | 4.19 | 0.27 | DataRepression |
| AT5G15840 | AT1G65480 | RefActivation | 0.22 | 0.26 | DataActivation |
| AT1G32770 | AT5G64060 | RefActivation | 0.00 | 0.25 | DataActivation |
| AT5G11260 | AT5G45110 | RefActivation | 4.19 | 0.25 | DataRepression |
| AT5G11260 | AT1G09070 | RefActivation | 4.19 | 0.24 | DataRepression |
| AT5G11260 | AT3G25250 | RefActivation | 4.19 | 0.23 | DataRepression |
| AT4G18960 | AT4G21590 | RefActivation | 0.37 | 0.22 | DataActivation |
| AT5G11260 | AT2G25460 | RefActivation | 4.19 | 0.22 | DataRepression |
| AT4G36920 | AT1G73805 | RefActivation | 2.75 | 0.21 | DataRepression |
| AT5G11260 | AT2G33580 | RefActivation | 4.19 | 0.21 | DataRepression |
| AT5G04340 | AT1G59870 | RefActivation | 0.16 | 0.21 | DataActivation |
| AT5G11260 | AT1G18740 | RefActivation | 4.19 | 0.20 | DataRepression |
| AT5G11260 | AT5G66650 | RefActivation | 4.19 | 0.20 | DataRepression |
| AT4G36920 | AT4G26690 | RefActivation | 2.75 | 0.20 | DataRepression |
| AT5G11260 | AT2G41100 | RefActivation | 4.19 | 0.18 | DataRepression |
| AT5G11260 | AT4G33920 | RefActivation | 4.19 | 0.17 | DataRepression |
| AT4G23810 | AT1G20630 | RefActivation | 0.17 | 0.17 | DataActivation |
| AT5G11260 | AT3G46080 | RefActivation | 4.19 | 0.17 | DataRepression |
| AT5G11260 | AT2G30040 | RefActivation | 4.19 | 0.17 | DataRepression |

|           |           |               |      |      |                |
|-----------|-----------|---------------|------|------|----------------|
| AT5G11260 | AT4G36670 | RefActivation | 4.19 | 0.16 | DataRepression |
| AT1G24260 | AT5G60910 | RefActivation | 0.10 | 0.16 | DataActivation |
| AT5G13790 | AT1G75190 | RefActivation | 5.31 | 0.16 | DataRepression |
| AT1G74930 | AT5G05440 | RefActivation | 0.04 | 0.16 | DataActivation |
| AT5G11260 | AT1G18570 | RefActivation | 4.19 | 0.15 | DataRepression |
| AT5G11260 | AT1G78990 | RefActivation | 4.19 | 0.15 | DataRepression |
| AT5G11260 | AT5G64660 | RefActivation | 4.19 | 0.15 | DataRepression |
| AT5G11260 | AT1G19180 | RefActivation | 4.19 | 0.15 | DataRepression |
| AT5G11260 | AT5G59550 | RefActivation | 4.19 | 0.14 | DataRepression |
| AT5G11260 | AT5G66210 | RefActivation | 4.19 | 0.14 | DataRepression |
| AT4G36920 | AT1G02205 | RefActivation | 2.75 | 0.14 | DataRepression |
| AT5G11260 | AT5G01100 | RefActivation | 4.19 | 0.13 | DataRepression |
| AT5G11260 | AT3G01830 | RefActivation | 4.19 | 0.12 | DataRepression |
| AT5G11260 | AT2G22500 | RefActivation | 4.19 | 0.12 | DataRepression |
| AT5G11260 | AT3G60550 | RefActivation | 4.19 | 0.12 | DataRepression |
| AT4G36920 | AT1G49230 | RefActivation | 2.75 | 0.12 | DataRepression |
| AT4G36920 | AT1G13260 | RefActivation | 2.75 | 0.11 | DataRepression |
| AT5G11260 | AT5G62520 | RefActivation | 4.19 | 0.11 | DataRepression |
| AT5G11260 | AT5G65300 | RefActivation | 4.19 | 0.10 | DataRepression |
| AT4G18960 | AT1G24260 | RefActivation | 0.37 | 0.10 | DataActivation |
| AT4G36920 | AT4G25480 | RefActivation | 2.75 | 0.10 | DataRepression |
| AT5G11260 | AT3G54810 | RefActivation | 4.19 | 0.10 | DataRepression |
| AT5G13790 | AT4G31800 | RefActivation | 5.31 | 0.10 | DataRepression |
| AT4G23810 | AT4G31800 | RefActivation | 0.17 | 0.10 | DataActivation |
| AT5G11260 | AT2G37530 | RefActivation | 4.19 | 0.09 | DataRepression |
| AT5G11260 | AT4G27280 | RefActivation | 4.19 | 0.09 | DataRepression |
| AT5G11260 | AT5G49520 | RefActivation | 4.19 | 0.09 | DataRepression |
| AT5G11260 | AT1G25400 | RefActivation | 4.19 | 0.09 | DataRepression |
| AT5G11260 | AT2G41640 | RefActivation | 4.19 | 0.08 | DataRepression |
| AT5G11260 | AT3G62720 | RefActivation | 4.19 | 0.08 | DataRepression |
| AT5G13790 | AT1G25550 | RefActivation | 5.31 | 0.08 | DataRepression |
| AT5G41315 | AT3G50800 | RefActivation | >=6  | 0.08 | DataRepression |
| AT5G11260 | AT3G50800 | RefActivation | 4.19 | 0.08 | DataRepression |
| AT5G11260 | AT3G02840 | RefActivation | 4.19 | 0.08 | DataRepression |
| AT5G11260 | AT2G39650 | RefActivation | 4.19 | 0.07 | DataRepression |
| AT5G11260 | AT2G22880 | RefActivation | 4.19 | 0.07 | DataRepression |
| AT5G11260 | AT5G45630 | RefActivation | 4.19 | 0.07 | DataRepression |
| AT5G11260 | AT1G61340 | RefActivation | 4.19 | 0.07 | DataRepression |
| AT5G11260 | AT3G56880 | RefActivation | 4.19 | 0.06 | DataRepression |
| AT5G11260 | AT2G35930 | RefActivation | 4.19 | 0.06 | DataRepression |
| AT5G11260 | AT1G19380 | RefActivation | 4.19 | 0.06 | DataRepression |
| AT5G11260 | AT5G43890 | RefActivation | 4.19 | 0.06 | DataRepression |
| AT5G11260 | AT1G18300 | RefActivation | 4.19 | 0.05 | DataRepression |
| AT5G11260 | AT1G73540 | RefActivation | 4.19 | 0.05 | DataRepression |
| AT5G11260 | AT5G05410 | RefActivation | 4.19 | 0.05 | DataRepression |
| AT5G11260 | AT3G52400 | RefActivation | 4.19 | 0.05 | DataRepression |
| AT5G13790 | AT5G25210 | RefActivation | 5.31 | 0.05 | DataRepression |
| AT5G11260 | AT2G35290 | RefActivation | 4.19 | 0.05 | DataRepression |
| AT4G36920 | AT1G27730 | RefActivation | 2.75 | 0.05 | DataRepression |
| AT5G11260 | AT4G08950 | RefActivation | 4.19 | 0.05 | DataRepression |
| AT4G36920 | AT4G08950 | RefActivation | 2.75 | 0.05 | DataRepression |
| AT4G36920 | AT5G64870 | RefActivation | 2.75 | 0.05 | DataRepression |

|           |           |               |      |      |                |
|-----------|-----------|---------------|------|------|----------------|
| AT5G11260 | AT3G06160 | RefActivation | 4.19 | 0.04 | DataRepression |
| AT5G11260 | AT3G55980 | RefActivation | 4.19 | 0.04 | DataRepression |
| AT4G36920 | AT3G55980 | RefActivation | 2.75 | 0.04 | DataRepression |
| AT5G11260 | AT5G51190 | RefActivation | 4.19 | 0.04 | DataRepression |
| AT5G11260 | AT5G59820 | RefActivation | 4.19 | 0.04 | DataRepression |
| AT5G11260 | AT1G76600 | RefActivation | 4.19 | 0.03 | DataRepression |
| AT5G11260 | AT4G29780 | RefActivation | 4.19 | 0.03 | DataRepression |
| AT5G11260 | AT1G66160 | RefActivation | 4.19 | 0.03 | DataRepression |
| AT5G11260 | AT3G19350 | RefActivation | 4.19 | 0.03 | DataRepression |
| AT4G18960 | AT1G14540 | RefActivation | 0.37 | 0.03 | DataActivation |
| AT5G11260 | AT5G45340 | RefActivation | 4.19 | 0.01 | DataRepression |
| AT5G11260 | AT2G27080 | RefActivation | 4.19 | 0.01 | DataRepression |
| AT5G11260 | AT1G21910 | RefActivation | 4.19 | 0.01 | DataRepression |
| AT5G11260 | AT1G77640 | RefActivation | 4.19 | 0.01 | DataRepression |
| AT5G11260 | AT1G76650 | RefActivation | 4.19 | 0.01 | DataRepression |
| AT5G11260 | AT3G22830 | RefActivation | 4.19 | 0.01 | DataRepression |
| AT5G11260 | AT1G07135 | RefActivation | 4.19 | 0.01 | DataRepression |
| AT5G11260 | AT4G25490 | RefActivation | 4.19 | 0.01 | DataRepression |
| AT5G11260 | AT2G40080 | RefActivation | 4.19 | 0.00 | DataRepression |
| AT5G13790 | AT5G25180 | RefActivation | 5.31 | 0.00 | DataRepression |
| AT5G11260 | AT4G34410 | RefActivation | 4.19 | 0.00 | DataRepression |
| AT5G13790 | AT1G07180 | RefRepression | 5.31 | >=6  | DataActivation |
| AT5G13790 | AT2G37040 | RefRepression | 5.31 | >=6  | DataActivation |
| AT5G13790 | AT5G05340 | RefRepression | 5.31 | >=6  | DataActivation |
| AT5G13790 | AT1G11700 | RefRepression | 5.31 | >=6  | DataActivation |
| AT5G13790 | AT3G48700 | RefRepression | 5.31 | >=6  | DataActivation |
| AT5G13790 | AT5G07010 | RefRepression | 5.31 | >=6  | DataActivation |
| AT5G11260 | AT1G13600 | RefRepression | 4.19 | >=6  | DataActivation |
| AT5G11260 | AT2G43570 | RefRepression | 4.19 | >=6  | DataActivation |
| AT5G11260 | AT3G21890 | RefRepression | 4.19 | >=6  | DataActivation |
| AT5G11260 | AT3G03450 | RefRepression | 4.19 | >=6  | DataActivation |
| AT5G11260 | AT1G80130 | RefRepression | 4.19 | >=6  | DataActivation |
| AT5G11260 | AT5G01300 | RefRepression | 4.19 | >=6  | DataActivation |
| AT5G11260 | AT2G15020 | RefRepression | 4.19 | >=6  | DataActivation |
| AT4G36920 | AT2G18470 | RefRepression | 2.75 | >=6  | DataActivation |
| AT4G36920 | AT4G13210 | RefRepression | 2.75 | >=6  | DataActivation |
| AT5G08330 | AT2G46830 | RefRepression | 0.28 | >=6  | DataRepression |
| AT4G36920 | AT5G13790 | RefRepression | 2.75 | 5.31 | DataActivation |
| AT4G36920 | AT3G55560 | RefRepression | 2.75 | 4.94 | DataActivation |
| AT5G13790 | AT4G12310 | RefRepression | 5.31 | 4.42 | DataActivation |
| AT5G11260 | AT3G04140 | RefRepression | 4.19 | 4.39 | DataActivation |
| AT5G13790 | AT5G41400 | RefRepression | 5.31 | 4.34 | DataActivation |
| AT4G36920 | AT5G01600 | RefRepression | 2.75 | 3.92 | DataActivation |
| AT5G13790 | AT4G37310 | RefRepression | 5.31 | 3.70 | DataActivation |
| AT5G13790 | AT2G47560 | RefRepression | 5.31 | 3.53 | DataActivation |
| AT4G36920 | AT4G24050 | RefRepression | 2.75 | 3.45 | DataActivation |
| AT5G11260 | AT2G46660 | RefRepression | 4.19 | 3.33 | DataActivation |
| AT2G43000 | AT1G15550 | RefRepression | >=6  | 3.23 | DataActivation |
| AT3G55560 | AT1G15550 | RefRepression | 4.94 | 3.23 | DataActivation |
| AT5G11260 | AT3G01350 | RefRepression | 4.19 | 3.17 | DataActivation |
| AT5G13790 | AT1G07090 | RefRepression | 5.31 | 3.14 | DataActivation |
| AT5G13790 | AT5G53870 | RefRepression | 5.31 | 3.09 | DataActivation |

|           |           |               |      |      |                |
|-----------|-----------|---------------|------|------|----------------|
| AT5G11260 | AT4G34610 | RefRepression | 4.19 | 2.87 | DataActivation |
| AT5G11260 | AT5G53370 | RefRepression | 4.19 | 2.75 | DataActivation |
| AT5G13790 | AT2G39210 | RefRepression | 5.31 | 2.54 | DataActivation |
| AT4G36920 | AT4G27240 | RefRepression | 2.75 | 2.50 | DataActivation |
| AT5G13790 | AT3G05360 | RefRepression | 5.31 | 2.39 | DataActivation |
| AT4G36920 | AT1G14280 | RefRepression | 2.75 | 2.38 | DataActivation |
| AT5G13790 | AT3G48690 | RefRepression | 5.31 | 2.36 | DataActivation |
| AT5G13790 | AT5G01840 | RefRepression | 5.31 | 2.33 | DataActivation |
| AT5G13790 | AT2G45830 | RefRepression | 5.31 | 2.26 | DataActivation |
| AT4G36920 | AT1G61580 | RefRepression | 2.75 | 2.22 | DataActivation |
| AT5G13790 | AT2G42610 | RefRepression | 5.31 | 2.20 | DataActivation |
| AT5G13790 | AT3G05180 | RefRepression | 5.31 | 2.01 | DataActivation |
| AT5G11260 | AT1G03630 | RefRepression | 4.19 | 0.55 | DataRepression |
| AT1G24260 | AT2G03710 | RefRepression | 0.10 | 0.52 | DataActivation |
| AT5G11260 | AT5G55220 | RefRepression | 4.19 | 0.50 | DataRepression |
| AT5G13790 | AT2G36830 | RefRepression | 5.31 | 0.48 | DataRepression |
| AT5G11260 | AT1G32450 | RefRepression | 4.19 | 0.48 | DataRepression |
| AT5G11260 | AT3G02990 | RefRepression | 4.19 | 0.48 | DataRepression |
| AT5G13790 | AT2G33860 | RefRepression | 5.31 | 0.48 | DataRepression |
| AT4G36920 | AT5G04020 | RefRepression | 2.75 | 0.46 | DataRepression |
| AT5G11260 | AT1G62780 | RefRepression | 4.19 | 0.45 | DataRepression |
| AT5G13790 | AT5G39760 | RefRepression | 5.31 | 0.43 | DataRepression |
| AT5G13790 | AT3G07390 | RefRepression | 5.31 | 0.41 | DataRepression |
| AT5G13790 | AT1G27480 | RefRepression | 5.31 | 0.40 | DataRepression |
| AT5G11260 | AT1G27480 | RefRepression | 4.19 | 0.40 | DataRepression |
| AT5G13790 | AT1G71880 | RefRepression | 5.31 | 0.39 | DataRepression |
| AT5G13790 | AT1G21670 | RefRepression | 5.31 | 0.39 | DataRepression |
| AT5G13790 | AT5G40170 | RefRepression | 5.31 | 0.39 | DataRepression |
| AT5G13790 | AT1G17620 | RefRepression | 5.31 | 0.34 | DataRepression |
| AT4G36920 | AT2G45660 | RefRepression | 2.75 | 0.33 | DataRepression |
| AT1G24260 | AT2G45660 | RefRepression | 0.10 | 0.33 | DataActivation |
| AT5G11260 | AT1G17460 | RefRepression | 4.19 | 0.32 | DataRepression |
| AT4G36920 | AT3G45140 | RefRepression | 2.75 | 0.28 | DataRepression |
| AT5G11260 | AT2G05160 | RefRepression | 4.19 | 0.26 | DataRepression |
| AT5G13790 | AT5G50570 | RefRepression | 5.31 | 0.26 | DataRepression |
| AT5G13790 | AT1G69870 | RefRepression | 5.31 | 0.26 | DataRepression |
| AT5G13790 | AT1G24530 | RefRepression | 5.31 | 0.21 | DataRepression |
| AT5G11260 | AT1G24530 | RefRepression | 4.19 | 0.21 | DataRepression |
| AT5G11260 | AT1G16850 | RefRepression | 4.19 | 0.21 | DataRepression |
| AT4G08150 | AT1G77530 | RefRepression | 0.00 | 0.21 | DataActivation |
| AT5G13790 | AT3G15840 | RefRepression | 5.31 | 0.19 | DataRepression |
| AT4G36920 | AT3G50700 | RefRepression | 2.75 | 0.19 | DataRepression |
| AT4G36920 | AT1G23390 | RefRepression | 2.75 | 0.19 | DataRepression |
| AT4G36920 | AT1G64380 | RefRepression | 2.75 | 0.18 | DataRepression |
| AT5G13790 | AT1G31290 | RefRepression | 5.31 | 0.16 | DataRepression |
| AT4G36920 | AT1G53160 | RefRepression | 2.75 | 0.15 | DataRepression |
| AT5G11260 | AT2G29630 | RefRepression | 4.19 | 0.14 | DataRepression |
| AT5G13790 | AT2G28120 | RefRepression | 5.31 | 0.14 | DataRepression |
| AT4G36920 | AT1G22530 | RefRepression | 2.75 | 0.13 | DataRepression |
| AT4G36920 | AT5G61590 | RefRepression | 2.75 | 0.12 | DataRepression |
| AT5G13790 | AT2G32210 | RefRepression | 5.31 | 0.11 | DataRepression |
| AT2G25000 | AT4G04450 | RefRepression | 2.97 | 0.10 | DataRepression |

|           |           |               |      |      |                |
|-----------|-----------|---------------|------|------|----------------|
| AT4G23810 | AT4G04450 | RefRepression | 0.17 | 0.10 | DataActivation |
| AT5G13790 | AT1G80450 | RefRepression | 5.31 | 0.10 | DataRepression |
| AT5G11260 | AT1G10760 | RefRepression | 4.19 | 0.10 | DataRepression |
| AT5G13790 | AT4G13340 | RefRepression | 5.31 | 0.07 | DataRepression |
| AT5G13790 | AT4G21680 | RefRepression | 5.31 | 0.06 | DataRepression |
| AT5G13790 | AT4G30430 | RefRepression | 5.31 | 0.05 | DataRepression |
| AT4G36920 | AT5G20250 | RefRepression | 2.75 | 0.05 | DataRepression |
| AT5G13790 | AT2G16660 | RefRepression | 5.31 | 0.05 | DataRepression |
| AT5G13790 | AT4G25470 | RefRepression | 5.31 | 0.05 | DataRepression |
| AT1G01060 | AT5G61380 | RefRepression | >=6  | 0.03 | DataRepression |
| AT2G46830 | AT5G61380 | RefRepression | >=6  | 0.03 | DataRepression |
| AT5G13790 | AT3G63160 | RefRepression | 5.31 | 0.02 | DataRepression |
| AT4G36920 | AT5G62360 | RefRepression | 2.75 | 0.01 | DataRepression |
| AT5G13790 | AT1G77640 | RefRepression | 5.31 | 0.01 | DataRepression |
| AT5G13790 | AT4G22470 | RefRepression | 5.31 | 0.01 | DataRepression |
| AT5G11260 | AT3G07650 | RefRepression | 4.19 | 0.01 | DataRepression |
| AT1G01060 | AT2G40080 | RefRepression | >=6  | 0.00 | DataRepression |
| AT2G46830 | AT2G40080 | RefRepression | >=6  | 0.00 | DataRepression |
| AT2G46830 | AT5G24470 | RefRepression | >=6  | 0.00 | DataRepression |
| AT5G13790 | AT1G52690 | RefRepression | 5.31 | 0.00 | DataRepression |
| AT5G11260 | AT2G35300 | RefRepression | 4.19 | 0.00 | DataRepression |
| AT4G36920 | AT4G34410 | RefRepression | 2.75 | 0.00 | DataRepression |

| TF(Trisomy5) | Target gene | Relation (AtRegNet) | Ratio(TF) | Ratio(target) | Relation (Data) |
|--------------|-------------|---------------------|-----------|---------------|-----------------|
| AT5G62380    | AT1G63910   | RefActivation       | 0.25      | >=6           | DataRepression  |
| AT5G62380    | AT1G20850   | RefActivation       | 0.25      | 0.20          | DataActivation  |
| AT5G62380    | AT3G08500   | RefActivation       | 0.25      | 0.17          | DataActivation  |
| AT5G62380    | AT4G35350   | RefActivation       | 0.25      | 0.11          | DataActivation  |
| AT5G62380    | AT1G01900   | RefActivation       | 0.25      | 0.05          | DataActivation  |
| AT4G18960    | AT4G22950   | RefActivation       | 0.05      | >=6           | DataRepression  |
| AT4G18960    | AT5G39610   | RefActivation       | 0.05      | >=6           | DataRepression  |
| AT4G18960    | AT1G73830   | RefActivation       | 0.05      | >=6           | DataRepression  |
| AT4G18960    | AT3G11000   | RefActivation       | 0.05      | 3.33          | DataRepression  |
| AT4G18960    | AT1G15550   | RefActivation       | 0.05      | 3.26          | DataRepression  |
| AT4G18960    | AT4G02180   | RefActivation       | 0.05      | 0.10          | DataActivation  |
| AT4G18960    | AT1G14540   | RefActivation       | 0.05      | 0.10          | DataActivation  |
| AT4G18960    | AT1G24260   | RefActivation       | 0.05      | 0.09          | DataActivation  |
| AT4G18960    | AT1G02190   | RefActivation       | 0.05      | 0.06          | DataActivation  |
| AT4G18960    | AT3G54340   | RefActivation       | 0.05      | 0.00          | DataActivation  |
| AT4G18960    | AT4G36740   | RefActivation       | 0.05      | 0.00          | DataActivation  |
| AT3G54340    | AT1G69490   | RefActivation       | 0.00      | 4.82          | DataRepression  |
| AT3G15500    | AT5G51070   | RefActivation       | >=6       | 2.25          | DataActivation  |
| AT3G08500    | AT2G16720   | RefActivation       | 0.17      | 3.16          | DataRepression  |
| AT3G08500    | AT5G25890   | RefActivation       | 0.17      | 2.43          | DataRepression  |
| AT3G08500    | AT4G34610   | RefActivation       | 0.17      | 1.97          | DataRepression  |
| AT3G08500    | AT1G66810   | RefActivation       | 0.17      | 0.43          | DataActivation  |
| AT3G08500    | AT2G37040   | RefActivation       | 0.17      | 0.37          | DataActivation  |
| AT3G08500    | AT1G65060   | RefActivation       | 0.17      | 0.23          | DataActivation  |
| AT2G46770    | AT1G63910   | RefActivation       | >=6       | >=6           | DataActivation  |
| AT2G46770    | AT3G08500   | RefActivation       | >=6       | 0.17          | DataRepression  |
| AT2G43000    | AT1G66350   | RefActivation       | 5.63      | 0.37          | DataRepression  |
| AT2G25000    | AT2G19190   | RefActivation       | 3.43      | 5.11          | DataActivation  |
| AT1G56010    | AT2G04160   | RefActivation       | 2.42      | 0.40          | DataRepression  |
| AT1G32770    | AT1G63910   | RefActivation       | >=6       | >=6           | DataActivation  |
| AT1G32770    | AT4G33450   | RefActivation       | >=6       | >=6           | DataActivation  |
| AT1G32770    | AT1G16420   | RefActivation       | >=6       | >=6           | DataActivation  |
| AT1G32770    | AT5G64530   | RefActivation       | >=6       | 5.58          | DataActivation  |
| AT1G32770    | AT1G66810   | RefActivation       | >=6       | 0.43          | DataRepression  |
| AT1G32770    | AT1G70500   | RefActivation       | >=6       | 0.41          | DataRepression  |
| AT1G32770    | AT2G28760   | RefActivation       | >=6       | 0.32          | DataRepression  |
| AT1G32770    | AT1G50010   | RefActivation       | >=6       | 0.28          | DataRepression  |
| AT1G32770    | AT1G26820   | RefActivation       | >=6       | 0.24          | DataRepression  |
| AT1G32770    | AT1G23460   | RefActivation       | >=6       | 0.20          | DataRepression  |
| AT1G32770    | AT1G20850   | RefActivation       | >=6       | 0.20          | DataRepression  |
| AT1G32770    | AT3G08500   | RefActivation       | >=6       | 0.17          | DataRepression  |
| AT1G32770    | AT4G35350   | RefActivation       | >=6       | 0.11          | DataRepression  |
| AT1G24260    | AT5G60910   | RefActivation       | 0.09      | 0.50          | DataActivation  |
| AT1G24260    | AT4G18960   | RefActivation       | 0.09      | 0.05          | DataActivation  |
| AT1G24260    | AT3G54340   | RefActivation       | 0.09      | 0.00          | DataActivation  |
| AT5G16560    | AT3G55560   | RefRepression       | 1.85      | >=6           | DataActivation  |
| AT5G16560    | AT5G17860   | RefRepression       | 1.85      | >=6           | DataActivation  |
| AT5G16560    | AT5G59780   | RefRepression       | 1.85      | >=6           | DataActivation  |
| AT5G16560    | AT4G27300   | RefRepression       | 1.85      | 5.08          | DataActivation  |
| AT5G16560    | AT4G38840   | RefRepression       | 1.85      | 3.45          | DataActivation  |
| AT5G16560    | AT5G47560   | RefRepression       | 1.85      | 3.35          | DataActivation  |

|           |           |               |      |      |                |
|-----------|-----------|---------------|------|------|----------------|
| AT5G16560 | AT5G03150 | RefRepression | 1.85 | 3.09 | DataActivation |
| AT5G16560 | AT5G47370 | RefRepression | 1.85 | 2.79 | DataActivation |
| AT5G16560 | AT5G52900 | RefRepression | 1.85 | 2.67 | DataActivation |
| AT5G16560 | AT2G30520 | RefRepression | 1.85 | 2.45 | DataActivation |
| AT5G16560 | AT5G61590 | RefRepression | 1.85 | 2.28 | DataActivation |
| AT5G16560 | AT1G01490 | RefRepression | 1.85 | 2.28 | DataActivation |
| AT5G16560 | AT3G61460 | RefRepression | 1.85 | 2.23 | DataActivation |
| AT5G16560 | AT5G67440 | RefRepression | 1.85 | 1.98 | DataActivation |
| AT5G16560 | AT5G63410 | RefRepression | 1.85 | 1.96 | DataActivation |
| AT5G16560 | AT5G09850 | RefRepression | 1.85 | 1.78 | DataActivation |
| AT5G16560 | AT3G49220 | RefRepression | 1.85 | 0.40 | DataRepression |
| AT5G16560 | AT4G16980 | RefRepression | 1.85 | 0.31 | DataRepression |
| AT5G16560 | AT1G01120 | RefRepression | 1.85 | 0.29 | DataRepression |
| AT5G10140 | AT1G65480 | RefRepression | >=6  | 3.74 | DataActivation |
| AT3G55560 | AT1G15550 | RefRepression | >=6  | 3.26 | DataActivation |
| AT2G44745 | AT2G46770 | RefRepression | 3.80 | >=6  | DataActivation |
| AT2G43000 | AT1G15550 | RefRepression | 5.63 | 3.26 | DataActivation |

| Transcription factor | Target gene | Relationship (AtRegNet) |
|----------------------|-------------|-------------------------|
| AT5G11260            | AT1G12950   | Activation              |
| AT5G11260            | AT1G21910   | Activation              |
| AT5G11260            | AT1G78440   | Activation              |
| AT5G11260            | AT3G14440   | Activation              |
| AT5G11260            | AT1G02810   | Activation              |
| AT5G11260            | AT1G07135   | Activation              |
| AT5G11260            | AT1G09070   | Activation              |
| AT5G11260            | AT1G57770   | Activation              |
| AT5G11260            | AT3G56880   | Activation              |
| AT5G11260            | AT2G27080   | Activation              |
| AT5G11260            | AT5G53310   | Activation              |
| AT5G11260            | AT2G34990   | Activation              |
| AT5G11260            | AT3G05820   | Activation              |
| AT5G11260            | AT2G41100   | Activation              |
| AT5G11260            | AT5G64660   | Activation              |
| AT5G11260            | AT3G52740   | Activation              |
| AT5G11260            | AT4G17500   | Activation              |
| AT5G11260            | AT5G66650   | Activation              |
| AT5G11260            | AT2G02870   | Activation              |
| AT5G11260            | AT5G50950   | Activation              |
| AT5G11260            | AT3G06160   | Activation              |
| AT5G11260            | AT4G08950   | Activation              |
| AT5G11260            | AT4G05100   | Activation              |
| AT5G11260            | AT3G22830   | Activation              |
| AT5G11260            | AT2G29670   | Activation              |
| AT5G11260            | AT4G27250   | Activation              |
| AT5G11260            | AT5G01550   | Activation              |
| AT5G11260            | AT5G45110   | Activation              |
| AT5G11260            | AT4G25490   | Activation              |
| AT5G11260            | AT5G62180   | Activation              |
| AT5G11260            | AT5G59820   | Activation              |
| AT5G11260            | AT3G13600   | Activation              |
| AT5G11260            | AT3G48520   | Activation              |
| AT5G11260            | AT5G43890   | Activation              |
| AT5G11260            | AT1G19380   | Activation              |
| AT5G11260            | AT2G36220   | Activation              |
| AT5G11260            | AT2G22500   | Activation              |
| AT5G11260            | AT3G01830   | Activation              |
| AT5G11260            | AT1G73500   | Activation              |
| AT5G11260            | AT2G44080   | Activation              |
| AT5G11260            | AT2G41640   | Activation              |
| AT5G11260            | AT5G02270   | Activation              |
| AT5G11260            | AT5G62520   | Activation              |
| AT5G11260            | AT2G37430   | Activation              |
| AT5G11260            | AT2G30040   | Activation              |
| AT5G11260            | AT4G27280   | Activation              |
| AT5G11260            | AT1G25400   | Activation              |
| AT5G11260            | AT4G29780   | Activation              |
| AT5G11260            | AT1G17420   | Activation              |
| AT5G11260            | AT1G73540   | Activation              |
| AT5G11260            | AT3G02840   | Activation              |



|           |           |            |
|-----------|-----------|------------|
| AT5G11260 | AT5G03210 | Activation |
| AT5G11260 | AT3G55240 | Activation |
| AT5G11260 | AT5G05270 | Activation |
| AT5G11260 | AT1G09480 | Activation |
| AT5G11260 | AT4G32800 | Activation |
| AT5G11260 | AT1G59640 | Activation |
| AT5G11260 | AT4G37770 | Activation |
| AT5G11260 | AT1G80850 | Activation |
| AT5G11260 | AT5G01730 | Activation |
| AT5G11260 | AT5G41170 | Activation |
| AT5G11260 | AT4G34410 | Activation |
| AT5G11260 | AT1G33560 | Activation |
| AT5G11260 | AT5G49520 | Activation |
| AT5G11260 | AT1G76650 | Activation |
| AT5G11260 | AT4G31870 | Activation |
| AT5G11260 | AT3G51240 | Activation |
| AT5G11260 | AT1G19210 | Activation |
| AT5G11260 | AT1G66160 | Activation |
| AT5G11260 | AT1G24140 | Activation |
| AT5G11260 | AT5G08640 | Activation |
| AT5G11260 | AT5G44110 | Activation |
| AT5G11260 | AT1G22750 | Activation |
| AT5G11260 | AT5G65260 | Activation |
| AT5G11260 | AT5G60360 | Activation |
| AT5G11260 | AT5G10100 | Activation |
| AT5G11260 | AT1G19180 | Activation |
| AT5G11260 | AT1G20510 | Activation |
| AT5G11260 | AT1G17380 | Activation |
| AT5G11260 | AT1G18570 | Activation |
| AT5G11260 | AT5G45340 | Activation |
| AT5G11260 | AT4G21420 | Activation |
| AT5G11260 | AT3G19350 | Activation |
| AT5G11260 | AT3G17130 | Activation |
| AT5G11260 | AT2G42870 | Activation |
| AT5G11260 | AT3G60550 | Activation |
| AT5G11260 | AT1G71697 | Activation |
| AT5G11260 | AT5G45630 | Activation |
| AT5G11260 | AT5G49280 | Activation |
| AT5G11260 | AT4G36040 | Activation |
| AT5G11260 | AT5G62020 | Activation |
| AT5G11260 | AT5G45820 | Activation |
| AT5G11260 | AT1G53170 | Activation |
| AT5G11260 | AT5G64550 | Activation |
| AT5G11260 | AT5G13700 | Activation |
| AT5G11260 | AT5G51190 | Activation |
| AT5G11260 | AT1G78990 | Activation |
| AT5G11260 | AT3G23610 | Activation |
| AT5G11260 | AT4G27310 | Activation |
| AT5G11260 | AT2G37530 | Activation |
| AT5G11260 | AT3G09010 | Activation |
| AT5G11260 | AT3G61680 | Activation |
| AT5G11260 | AT3G62720 | Activation |

|           |           |            |
|-----------|-----------|------------|
| AT5G11260 | AT3G52400 | Activation |
| AT5G11260 | AT3G25250 | Activation |
| AT5G11260 | AT2G39650 | Activation |
| AT5G11260 | AT4G36670 | Activation |
| AT5G11260 | AT2G03300 | Activation |
| AT5G11260 | AT5G05410 | Activation |
| AT5G11260 | AT1G60190 | Activation |
| AT5G11260 | AT1G61890 | Activation |
| AT5G11260 | AT4G34150 | Activation |
| AT5G11260 | AT5G66210 | Activation |
| AT5G11260 | AT5G02280 | Activation |
| AT5G11260 | AT2G32510 | Activation |
| AT5G11260 | AT5G01100 | Activation |
| AT5G11260 | AT4G33920 | Activation |
| AT5G11260 | AT2G47460 | Activation |
| AT5G11260 | AT3G54810 | Activation |
| AT5G11260 | AT5G23010 | Activation |
| AT5G11260 | AT4G13010 | Activation |
| AT5G11260 | AT5G15510 | Activation |
| AT5G11260 | AT5G67400 | Activation |
| AT5G11260 | AT5G59550 | Activation |
| AT5G11260 | AT5G54510 | Activation |
| AT5G11260 | AT5G65300 | Activation |
| AT5G11260 | AT3G55980 | Activation |
| AT5G11260 | AT2G35930 | Activation |
| AT5G11260 | AT5G52020 | Activation |
| AT5G11260 | AT2G35290 | Activation |
| AT5G11260 | AT2G34330 | Activation |
| AT5G11260 | AT1G61340 | Activation |
| AT5G11260 | AT2G28630 | Activation |
| AT5G11260 | AT2G33580 | Activation |
| AT5G11260 | AT1G77640 | Activation |
| AT5G11260 | AT5G25810 | Activation |
| AT5G11260 | AT2G22880 | Activation |
| AT5G11260 | AT1G68840 | Activation |
| AT5G11260 | AT1G56660 | Activation |
| AT5G11260 | AT5G57510 | Activation |
| AT5G11260 | AT1G76600 | Activation |
| AT5G11260 | AT3G50850 | Activation |
| AT5G11260 | AT1G68620 | Activation |
| AT5G11260 | AT3G46080 | Activation |
| AT5G11260 | AT1G18740 | Activation |
| AT5G11260 | AT3G50800 | Activation |
| AT5G11260 | AT5G47590 | Activation |
| AT5G11260 | AT2G25460 | Activation |
| AT5G11260 | AT3G62260 | Activation |
| AT5G11260 | AT1G18300 | Activation |
| AT1G28300 | AT5G13790 | Activation |
| AT1G28300 | AT3G62100 | Activation |
| AT1G28300 | AT1G65090 | Activation |
| AT1G28300 | AT1G67100 | Activation |
| AT1G28300 | AT3G54940 | Activation |

|           |           |            |
|-----------|-----------|------------|
| AT1G28300 | AT2G41070 | Activation |
| AT1G28300 | AT5G50600 | Activation |
| AT1G28300 | AT5G54740 | Activation |
| AT1G28300 | AT4G25140 | Activation |
| AT1G28300 | AT4G27150 | Activation |
| AT1G28300 | AT4G27160 | Activation |
| AT1G28300 | AT4G27170 | Activation |
| AT1G28300 | AT5G44120 | Activation |
| AT1G28300 | AT4G27140 | Activation |
| AT5G03790 | AT1G26310 | Activation |
| AT5G62020 | AT1G16030 | Activation |
| AT5G62020 | AT4G10250 | Activation |
| AT5G62020 | AT5G59720 | Activation |
| AT5G62020 | AT4G27670 | Activation |
| AT5G62020 | AT1G52560 | Activation |
| AT5G62020 | AT3G09640 | Activation |
| AT1G62300 | AT2G19190 | Activation |
| AT3G62420 | AT3G30775 | Activation |
| AT2G25000 | AT2G19190 | Activation |
| AT5G15840 | AT4G20370 | Activation |
| AT2G36270 | AT3G51810 | Activation |
| AT1G28300 | AT3G01570 | Activation |
| AT2G36010 | AT1G07270 | Activation |
| AT2G36010 | AT5G42680 | Activation |
| AT5G02470 | AT5G42680 | Activation |
| AT1G21970 | AT3G26790 | Activation |
| AT1G21970 | AT3G24650 | Activation |
| AT3G26790 | AT1G62290 | Activation |
| AT2G36010 | AT5G15540 | Activation |
| AT5G02470 | AT5G15540 | Activation |
| AT2G36010 | AT5G07950 | Activation |
| AT5G02470 | AT5G07950 | Activation |
| AT2G36010 | AT3G54180 | Activation |
| AT5G02470 | AT3G54180 | Activation |
| AT2G36010 | AT2G46200 | Activation |
| AT5G02470 | AT2G46200 | Activation |
| AT2G36010 | AT1G80190 | Activation |
| AT5G02470 | AT1G80190 | Activation |
| AT2G36010 | AT4G31400 | Activation |
| AT5G02470 | AT4G31400 | Activation |
| AT2G36010 | AT3G17030 | Activation |
| AT5G02470 | AT3G17030 | Activation |
| AT2G36010 | AT2G46380 | Activation |
| AT5G02470 | AT2G46380 | Activation |
| AT2G36010 | AT3G60660 | Activation |
| AT5G02470 | AT3G60660 | Activation |
| AT2G36010 | AT5G06590 | Activation |
| AT5G02470 | AT5G06590 | Activation |
| AT2G36010 | AT2G40550 | Activation |
| AT5G02470 | AT2G40550 | Activation |
| AT2G36010 | AT1G78650 | Activation |
| AT5G02470 | AT1G78650 | Activation |

|           |           |            |
|-----------|-----------|------------|
| AT2G36010 | AT2G24970 | Activation |
| AT5G02470 | AT2G24970 | Activation |
| AT2G36010 | AT5G03700 | Activation |
| AT5G02470 | AT5G03700 | Activation |
| AT2G36010 | AT1G31020 | Activation |
| AT5G02470 | AT1G31020 | Activation |
| AT2G36010 | AT1G49540 | Activation |
| AT5G02470 | AT1G49540 | Activation |
| AT2G36010 | AT3G23020 | Activation |
| AT5G02470 | AT3G23020 | Activation |
| AT2G36010 | AT1G45110 | Activation |
| AT5G02470 | AT1G45110 | Activation |
| AT2G36010 | AT3G51450 | Activation |
| AT5G02470 | AT3G51450 | Activation |
| AT2G36010 | AT4G30840 | Activation |
| AT5G02470 | AT4G30840 | Activation |
| AT2G36010 | AT4G14770 | Activation |
| AT5G02470 | AT4G14770 | Activation |
| AT2G36010 | AT2G02810 | Activation |
| AT5G02470 | AT2G02810 | Activation |
| AT2G36010 | AT5G19920 | Activation |
| AT5G02470 | AT5G19920 | Activation |
| AT2G36010 | AT3G42660 | Activation |
| AT5G02470 | AT3G42660 | Activation |
| AT2G36010 | AT5G06910 | Activation |
| AT5G02470 | AT5G06910 | Activation |
| AT2G36010 | AT1G80720 | Activation |
| AT5G02470 | AT1G80720 | Activation |
| AT2G36010 | AT3G12170 | Activation |
| AT5G02470 | AT3G12170 | Activation |
| AT2G36010 | AT5G14530 | Activation |
| AT5G02470 | AT5G14530 | Activation |
| AT2G36010 | AT3G54650 | Activation |
| AT5G02470 | AT3G54650 | Activation |
| AT2G36010 | AT5G52910 | Activation |
| AT5G02470 | AT5G52910 | Activation |
| AT2G36010 | AT1G04730 | Activation |
| AT5G02470 | AT1G04730 | Activation |
| AT2G36010 | AT1G34770 | Activation |
| AT5G02470 | AT1G34770 | Activation |
| AT2G36010 | AT3G63480 | Activation |
| AT5G02470 | AT3G63480 | Activation |
| AT2G36010 | AT2G47680 | Activation |
| AT5G02470 | AT2G47680 | Activation |
| AT2G36010 | AT3G27640 | Activation |
| AT5G02470 | AT3G27640 | Activation |
| AT2G36010 | AT4G14365 | Activation |
| AT5G02470 | AT4G14365 | Activation |
| AT2G36010 | AT1G68200 | Activation |
| AT5G02470 | AT1G68200 | Activation |
| AT2G36010 | AT4G23860 | Activation |
| AT5G02470 | AT4G23860 | Activation |

|           |           |            |
|-----------|-----------|------------|
| AT2G36010 | AT3G02820 | Activation |
| AT5G02470 | AT3G02820 | Activation |
| AT2G36010 | AT1G33420 | Activation |
| AT5G02470 | AT1G33420 | Activation |
| AT2G36010 | AT2G41460 | Activation |
| AT5G02470 | AT2G41460 | Activation |
| AT2G36010 | AT3G24320 | Activation |
| AT5G02470 | AT3G24320 | Activation |
| AT2G36010 | AT5G44740 | Activation |
| AT5G02470 | AT5G44740 | Activation |
| AT2G36010 | AT5G22750 | Activation |
| AT5G02470 | AT5G22750 | Activation |
| AT2G36010 | AT4G25540 | Activation |
| AT5G02470 | AT4G25540 | Activation |
| AT2G36010 | AT3G14890 | Activation |
| AT5G02470 | AT3G14890 | Activation |
| AT2G36010 | AT4G17760 | Activation |
| AT5G02470 | AT4G17760 | Activation |
| AT2G36010 | AT4G02460 | Activation |
| AT5G02470 | AT4G02460 | Activation |
| AT2G36010 | AT3G15620 | Activation |
| AT5G02470 | AT3G15620 | Activation |
| AT2G36010 | AT5G66130 | Activation |
| AT5G02470 | AT5G66130 | Activation |
| AT2G36010 | AT4G02070 | Activation |
| AT5G02470 | AT4G02070 | Activation |
| AT2G36010 | AT3G18630 | Activation |
| AT5G02470 | AT3G18630 | Activation |
| AT2G36010 | AT1G66740 | Activation |
| AT5G02470 | AT1G66740 | Activation |
| AT2G36010 | AT5G18620 | Activation |
| AT5G02470 | AT5G18620 | Activation |
| AT2G36010 | AT5G62410 | Activation |
| AT5G02470 | AT5G62410 | Activation |
| AT2G36010 | AT1G69770 | Activation |
| AT5G02470 | AT1G69770 | Activation |
| AT2G36010 | AT5G38110 | Activation |
| AT5G02470 | AT5G38110 | Activation |
| AT2G36010 | AT2G44980 | Activation |
| AT5G02470 | AT2G44980 | Activation |
| AT2G36010 | AT2G31650 | Activation |
| AT5G02470 | AT2G31650 | Activation |
| AT2G36010 | AT5G56740 | Activation |
| AT5G02470 | AT5G56740 | Activation |
| AT2G36010 | AT3G59550 | Activation |
| AT5G02470 | AT3G59550 | Activation |
| AT2G36010 | AT5G49160 | Activation |
| AT5G02470 | AT5G49160 | Activation |
| AT2G36010 | AT1G65470 | Activation |
| AT5G02470 | AT1G65470 | Activation |
| AT2G36010 | AT1G13330 | Activation |
| AT5G02470 | AT1G13330 | Activation |

|           |           |            |
|-----------|-----------|------------|
| AT2G36010 | AT5G61460 | Activation |
| AT5G02470 | AT5G61460 | Activation |
| AT2G36010 | AT5G24330 | Activation |
| AT5G02470 | AT5G24330 | Activation |
| AT2G36010 | AT1G07270 | Activation |
| AT5G02470 | AT1G07270 | Activation |
| AT2G36010 | AT3G25100 | Activation |
| AT5G02470 | AT3G25100 | Activation |
| AT2G36010 | AT5G23420 | Activation |
| AT5G02470 | AT5G23420 | Activation |
| AT2G36010 | AT5G07660 | Activation |
| AT5G02470 | AT5G07660 | Activation |
| AT2G36010 | AT1G44900 | Activation |
| AT5G02470 | AT1G44900 | Activation |
| AT2G36010 | AT2G16440 | Activation |
| AT5G02470 | AT2G16440 | Activation |
| AT2G36010 | AT3G09660 | Activation |
| AT5G02470 | AT3G09660 | Activation |
| AT2G36010 | AT2G31270 | Activation |
| AT5G02470 | AT2G31270 | Activation |
| AT2G36010 | AT1G26840 | Activation |
| AT5G02470 | AT1G26840 | Activation |
| AT2G36010 | AT4G12620 | Activation |
| AT5G02470 | AT4G12620 | Activation |
| AT2G36010 | AT5G16690 | Activation |
| AT5G02470 | AT5G16690 | Activation |
| AT2G36010 | AT2G14050 | Activation |
| AT5G02470 | AT2G14050 | Activation |
| AT2G36010 | AT2G29680 | Activation |
| AT5G02470 | AT2G29680 | Activation |
| AT2G36010 | AT3G10690 | Activation |
| AT5G02470 | AT3G10690 | Activation |
| AT2G36010 | AT5G27740 | Activation |
| AT5G02470 | AT5G27740 | Activation |
| AT2G36010 | AT3G02920 | Activation |
| AT5G02470 | AT3G02920 | Activation |
| AT2G36010 | AT1G67500 | Activation |
| AT5G02470 | AT1G67500 | Activation |
| AT2G36010 | AT1G08130 | Activation |
| AT5G02470 | AT1G08130 | Activation |
| AT2G36010 | AT1G07370 | Activation |
| AT5G02470 | AT1G07370 | Activation |
| AT2G36010 | AT2G42120 | Activation |
| AT5G02470 | AT2G42120 | Activation |
| AT2G36010 | AT2G24490 | Activation |
| AT5G02470 | AT2G24490 | Activation |
| AT2G36010 | AT2G29570 | Activation |
| AT5G02470 | AT2G29570 | Activation |
| AT2G36010 | AT1G79890 | Activation |
| AT5G02470 | AT1G79890 | Activation |
| AT2G36010 | AT1G20720 | Activation |
| AT5G02470 | AT1G20720 | Activation |

|           |           |            |
|-----------|-----------|------------|
| AT2G36010 | AT5G49010 | Activation |
| AT5G02470 | AT5G49010 | Activation |
| AT2G36010 | AT3G46940 | Activation |
| AT5G02470 | AT3G46940 | Activation |
| AT2G36010 | AT5G41880 | Activation |
| AT5G02470 | AT5G41880 | Activation |
| AT2G36010 | AT5G67100 | Activation |
| AT5G02470 | AT5G67100 | Activation |
| AT2G36010 | AT2G21790 | Activation |
| AT5G02470 | AT2G21790 | Activation |
| AT2G36010 | AT5G63960 | Activation |
| AT5G02470 | AT5G63960 | Activation |
| AT2G36010 | AT5G63920 | Activation |
| AT5G02470 | AT5G63920 | Activation |
| AT2G36010 | AT3G27060 | Activation |
| AT5G02470 | AT3G27060 | Activation |
| AT2G36010 | AT1G67320 | Activation |
| AT5G02470 | AT1G67320 | Activation |
| AT2G36010 | AT1G67630 | Activation |
| AT5G02470 | AT1G67630 | Activation |
| AT2G36010 | AT3G01330 | Activation |
| AT5G02470 | AT3G01330 | Activation |
| AT2G36010 | AT1G20750 | Activation |
| AT5G02470 | AT1G20750 | Activation |
| AT2G36010 | AT1G35530 | Activation |
| AT5G02470 | AT1G35530 | Activation |
| AT2G36010 | AT3G05740 | Activation |
| AT5G02470 | AT3G05740 | Activation |
| AT1G32640 | AT1G77120 | Activation |
| AT2G36010 | AT3G12280 | Activation |
| AT5G02470 | AT3G12280 | Activation |
| AT2G47190 | AT5G25610 | Activation |
| AT1G32640 | AT5G25610 | Activation |
| AT5G15840 | AT1G62960 | Activation |
| AT5G15840 | AT3G55610 | Activation |
| AT2G47190 | AT1G77120 | Activation |
| AT3G27010 | AT4G37490 | Activation |
| AT3G27010 | AT2G29570 | Activation |
| AT3G27010 | AT3G53020 | Activation |
| AT3G27010 | AT1G23290 | Activation |
| AT3G27010 | AT3G46040 | Activation |
| AT1G56010 | AT2G04160 | Activation |
| AT4G27410 | AT1G02850 | Activation |
| AT4G35900 | AT1G69120 | Activation |
| AT1G42990 | AT2G31955 | Activation |
| AT5G14750 | AT2G46410 | Activation |
| AT5G14750 | AT1G79840 | Activation |
| AT1G42990 | AT1G09080 | Activation |
| AT1G42990 | AT5G20990 | Activation |
| AT5G21120 | AT3G23240 | Activation |
| AT2G27050 | AT3G23240 | Activation |
| AT3G20770 | AT3G23240 | Activation |

|           |           |            |
|-----------|-----------|------------|
| AT1G42990 | AT5G42020 | Activation |
| AT1G42990 | AT5G28540 | Activation |
| AT1G42990 | AT1G42990 | Activation |
| AT4G18960 | AT1G13400 | Activation |
| AT4G18960 | AT1G02190 | Activation |
| AT4G18960 | AT4G21590 | Activation |
| AT4G18960 | AT4G32980 | Activation |
| AT4G18960 | AT3G17010 | Activation |
| AT4G18960 | AT1G47610 | Activation |
| AT4G18960 | AT3G11000 | Activation |
| AT1G14685 | AT4G09960 | Activation |
| AT4G01930 | AT4G09960 | Activation |
| AT2G21240 | AT1G23420 | Activation |
| AT1G22070 | AT2G14610 | Activation |
| AT5G06950 | AT2G14610 | Activation |
| AT5G61850 | AT1G69120 | Activation |
| AT4G18960 | AT3G23130 | Activation |
| AT5G15840 | AT1G65480 | Activation |
| AT5G15840 | AT2G45660 | Activation |
| AT5G13790 | AT5G13790 | Activation |
| AT2G17950 | AT4G18960 | Activation |
| AT4G18960 | AT4G18960 | Activation |
| AT4G18960 | AT1G24260 | Activation |
| AT4G18960 | AT1G15550 | Activation |
| AT4G18960 | AT3G54340 | Activation |
| AT4G18960 | AT1G69180 | Activation |
| AT4G23810 | AT1G20620 | Activation |
| AT4G23810 | AT4G35090 | Activation |
| AT4G23810 | AT1G20630 | Activation |
| AT4G23810 | AT5G45890 | Activation |
| AT4G23810 | AT5G01900 | Activation |
| AT4G23810 | AT4G31800 | Activation |
| AT4G23810 | AT4G23550 | Activation |
| AT4G23810 | AT4G01250 | Activation |
| AT4G23810 | AT4G39410 | Activation |
| AT3G24520 | AT2G47180 | Activation |
| AT4G02640 | AT4G27160 | Activation |
| AT3G54340 | AT3G23130 | Activation |
| AT5G20240 | AT3G23130 | Activation |
| AT4G27410 | AT4G19120 | Activation |
| AT1G52890 | AT1G56410 | Activation |
| AT3G15500 | AT5G51070 | Activation |
| AT4G09820 | AT1G61720 | Activation |
| AT5G35550 | AT1G61720 | Activation |
| AT1G69120 | AT3G54340 | Activation |
| AT3G54340 | AT3G54340 | Activation |
| AT5G20240 | AT3G54340 | Activation |
| AT3G54340 | AT1G69490 | Activation |
| AT5G20240 | AT1G69490 | Activation |
| AT4G18960 | AT2G42830 | Activation |
| AT4G18960 | AT2G27330 | Activation |
| AT5G61850 | AT1G26310 | Activation |



|           |           |            |
|-----------|-----------|------------|
| AT5G61850 | AT1G68880 | Activation |
| AT5G61850 | AT2G44450 | Activation |
| AT5G61850 | AT3G19390 | Activation |
| AT5G61850 | AT1G61830 | Activation |
| AT5G61850 | AT3G47340 | Activation |
| AT5G61850 | AT3G43190 | Activation |
| AT5G61850 | AT3G52470 | Activation |
| AT5G61850 | AT4G14090 | Activation |
| AT5G61850 | AT4G22780 | Activation |
| AT5G61850 | AT3G61250 | Activation |
| AT5G61850 | AT1G16070 | Activation |
| AT5G61850 | AT5G60630 | Activation |
| AT5G61850 | AT5G49770 | Activation |
| AT5G61850 | AT5G03790 | Activation |
| AT5G61850 | AT5G03230 | Activation |
| AT5G61850 | AT3G54340 | Activation |
| AT5G61850 | AT4G18960 | Activation |
| AT5G06100 | AT5G61850 | Activation |
| AT4G32730 | AT1G08560 | Activation |
| AT5G11510 | AT1G08560 | Activation |
| AT1G09530 | AT5G13930 | Activation |
| AT1G09530 | AT3G55120 | Activation |
| AT1G09530 | AT3G51240 | Activation |
| AT1G09530 | AT5G07990 | Activation |
| AT1G09530 | AT5G42800 | Activation |
| AT1G09530 | AT4G22880 | Activation |
| AT5G11260 | AT5G13930 | Activation |
| AT5G11260 | AT3G55120 | Activation |
| AT5G11260 | AT5G07990 | Activation |
| AT5G11260 | AT5G42800 | Activation |
| AT5G11260 | AT4G22880 | Activation |
| AT2G37260 | AT2G37260 | Activation |
| AT3G27920 | AT4G00480 | Activation |
| AT5G41315 | AT4G00480 | Activation |
| AT3G27920 | AT5G52510 | Activation |
| AT5G41315 | AT5G52510 | Activation |
| AT3G27920 | AT5G28350 | Activation |
| AT5G41315 | AT5G28350 | Activation |
| AT3G27920 | AT4G20960 | Activation |
| AT5G41315 | AT4G20960 | Activation |
| AT3G27920 | AT3G50800 | Activation |
| AT5G41315 | AT3G50800 | Activation |
| AT3G27920 | AT3G50790 | Activation |
| AT5G41315 | AT3G50790 | Activation |
| AT3G27920 | AT2G30410 | Activation |
| AT5G41315 | AT2G30410 | Activation |
| AT3G27920 | AT3G60830 | Activation |
| AT5G41315 | AT3G60830 | Activation |
| AT3G27920 | AT3G12280 | Activation |
| AT5G41315 | AT3G12280 | Activation |
| AT3G27920 | AT4G01060 | Activation |
| AT5G41315 | AT4G01060 | Activation |

|           |           |            |
|-----------|-----------|------------|
| AT3G27920 | AT5G04470 | Activation |
| AT5G41315 | AT5G04470 | Activation |
| AT3G27920 | AT2G26250 | Activation |
| AT5G41315 | AT2G26250 | Activation |
| AT3G27920 | AT2G37260 | Activation |
| AT5G41315 | AT2G37260 | Activation |
| AT3G27920 | AT2G46410 | Activation |
| AT5G41315 | AT2G46410 | Activation |
| AT3G27920 | AT1G01380 | Activation |
| AT5G41315 | AT1G01380 | Activation |
| AT3G27920 | AT1G79840 | Activation |
| AT5G41315 | AT1G79840 | Activation |
| AT2G20180 | AT1G01260 | Activation |
| AT2G20180 | AT1G01650 | Activation |
| AT2G20180 | AT1G01720 | Activation |
| AT2G20180 | AT1G03590 | Activation |
| AT2G20180 | AT1G03600 | Activation |
| AT2G20180 | AT1G03610 | Activation |
| AT2G20180 | AT1G03790 | Activation |
| AT2G20180 | AT1G04120 | Activation |
| AT2G20180 | AT1G06400 | Activation |
| AT2G20180 | AT1G07430 | Activation |
| AT2G20180 | AT1G08570 | Activation |
| AT2G20180 | AT1G09570 | Activation |
| AT2G20180 | AT1G14910 | Activation |
| AT2G20180 | AT1G16730 | Activation |
| AT2G20180 | AT1G16840 | Activation |
| AT2G20180 | AT1G16850 | Activation |
| AT2G20180 | AT1G17830 | Activation |
| AT2G20180 | AT1G19110 | Activation |
| AT2G20180 | AT1G20620 | Activation |
| AT2G20180 | AT1G22060 | Activation |
| AT2G20180 | AT1G22770 | Activation |
| AT2G20180 | AT1G27990 | Activation |
| AT2G20180 | AT1G28330 | Activation |
| AT2G20180 | AT1G30110 | Activation |
| AT2G20180 | AT1G49500 | Activation |
| AT2G20180 | AT1G56220 | Activation |
| AT2G20180 | AT1G62290 | Activation |
| AT2G20180 | AT1G67100 | Activation |
| AT2G20180 | AT1G67310 | Activation |
| AT2G20180 | AT1G68670 | Activation |
| AT2G20180 | AT1G69010 | Activation |
| AT2G20180 | AT1G69840 | Activation |
| AT2G20180 | AT1G70790 | Activation |
| AT2G20180 | AT1G75450 | Activation |
| AT2G20180 | AT1G75490 | Activation |
| AT2G20180 | AT1G75810 | Activation |
| AT2G20180 | AT1G76990 | Activation |
| AT2G20180 | AT1G78700 | Activation |
| AT2G20180 | AT2G01570 | Activation |
| AT2G20180 | AT2G18790 | Activation |

|           |           |            |
|-----------|-----------|------------|
| AT2G20180 | AT2G28420 | Activation |
| AT2G20180 | AT2G31980 | Activation |
| AT2G20180 | AT2G36270 | Activation |
| AT2G20180 | AT2G38465 | Activation |
| AT2G20180 | AT2G44920 | Activation |
| AT2G20180 | AT2G45590 | Activation |
| AT2G20180 | AT2G45620 | Activation |
| AT2G20180 | AT2G45820 | Activation |
| AT2G20180 | AT2G45910 | Activation |
| AT2G20180 | AT2G46270 | Activation |
| AT2G20180 | AT2G46710 | Activation |
| AT2G20180 | AT3G02540 | Activation |
| AT2G20180 | AT3G03150 | Activation |
| AT2G20180 | AT3G05120 | Activation |
| AT2G20180 | AT3G12920 | Activation |
| AT2G20180 | AT3G14360 | Activation |
| AT2G20180 | AT3G18080 | Activation |
| AT2G20180 | AT3G19590 | Activation |
| AT2G20180 | AT3G24503 | Activation |
| AT2G20180 | AT3G24650 | Activation |
| AT2G20180 | AT3G25870 | Activation |
| AT2G20180 | AT3G44310 | Activation |
| AT2G20180 | AT3G47640 | Activation |
| AT2G20180 | AT3G47650 | Activation |
| AT2G20180 | AT3G47950 | Activation |
| AT2G20180 | AT3G52500 | Activation |
| AT2G20180 | AT3G56350 | Activation |
| AT2G20180 | AT3G57020 | Activation |
| AT2G20180 | AT3G60690 | Activation |
| AT2G20180 | AT3G61420 | Activation |
| AT2G20180 | AT3G61830 | Activation |
| AT2G20180 | AT3G62090 | Activation |
| AT2G20180 | AT3G63350 | Activation |
| AT2G20180 | AT4G10020 | Activation |
| AT2G20180 | AT4G18650 | Activation |
| AT2G20180 | AT4G19700 | Activation |
| AT2G20180 | AT4G24110 | Activation |
| AT2G20180 | AT4G27460 | Activation |
| AT2G20180 | AT4G28240 | Activation |
| AT2G20180 | AT4G31390 | Activation |
| AT2G20180 | AT4G33800 | Activation |
| AT2G20180 | AT4G37550 | Activation |
| AT2G20180 | AT4G39800 | Activation |
| AT2G20180 | AT5G01720 | Activation |
| AT2G20180 | AT5G01950 | Activation |
| AT2G20180 | AT5G02200 | Activation |
| AT2G20180 | AT5G02580 | Activation |
| AT2G20180 | AT5G04590 | Activation |
| AT2G20180 | AT5G06980 | Activation |
| AT2G20180 | AT5G07010 | Activation |
| AT2G20180 | AT5G07020 | Activation |
| AT2G20180 | AT5G08139 | Activation |

|           |           |            |
|-----------|-----------|------------|
| AT2G20180 | AT5G09970 | Activation |
| AT2G20180 | AT5G10740 | Activation |
| AT2G20180 | AT5G23850 | Activation |
| AT2G20180 | AT5G24930 | Activation |
| AT2G20180 | AT5G28300 | Activation |
| AT2G20180 | AT5G35660 | Activation |
| AT2G20180 | AT5G49710 | Activation |
| AT2G20180 | AT5G58350 | Activation |
| AT2G20180 | AT5G58650 | Activation |
| AT2G20180 | AT5G61590 | Activation |
| AT2G20180 | AT5G62390 | Activation |
| AT2G20180 | AT5G62670 | Activation |
| AT2G20180 | AT5G63530 | Activation |
| AT2G20180 | AT5G64260 | Activation |
| AT2G20180 | AT5G65380 | Activation |
| AT2G20180 | AT5G65430 | Activation |
| AT2G20180 | AT5G66590 | Activation |
| AT2G20180 | AT5G66730 | Activation |
| AT1G24260 | AT5G60910 | Activation |
| AT1G24260 | AT5G20240 | Activation |
| AT1G24260 | AT5G15800 | Activation |
| AT1G24260 | AT5G13790 | Activation |
| AT1G24260 | AT4G18960 | Activation |
| AT1G24260 | AT3G58780 | Activation |
| AT1G24260 | AT3G54340 | Activation |
| AT1G24260 | AT3G02310 | Activation |
| AT1G24260 | AT2G42830 | Activation |
| AT1G24260 | AT1G69120 | Activation |
| AT1G24260 | AT1G24260 | Activation |
| AT4G18960 | AT2G35270 | Activation |
| AT4G18960 | AT3G29020 | Activation |
| AT4G18960 | AT4G22950 | Activation |
| AT4G18960 | AT4G36740 | Activation |
| AT4G18960 | AT4G37940 | Activation |
| AT4G18960 | AT5G22570 | Activation |
| AT4G18960 | AT5G39610 | Activation |
| AT4G18960 | AT5G49330 | Activation |
| AT4G18960 | AT1G14540 | Activation |
| AT4G18960 | AT1G48620 | Activation |
| AT4G18960 | AT1G73830 | Activation |
| AT4G18960 | AT2G02710 | Activation |
| AT4G18960 | AT2G15590 | Activation |
| AT4G18960 | AT2G27550 | Activation |
| AT4G18960 | AT2G31430 | Activation |
| AT4G18960 | AT3G61410 | Activation |
| AT4G18960 | AT4G02180 | Activation |
| AT4G18960 | AT4G09100 | Activation |
| AT4G18960 | AT4G12550 | Activation |
| AT4G18960 | AT5G12000 | Activation |
| AT4G18960 | AT5G35390 | Activation |
| AT4G18960 | AT5G39540 | Activation |
| AT4G18960 | AT5G40860 | Activation |

|           |           |            |
|-----------|-----------|------------|
| AT5G13790 | AT1G04030 | Activation |
| AT5G13790 | AT1G12780 | Activation |
| AT5G13790 | AT1G29090 | Activation |
| AT5G13790 | AT1G45180 | Activation |
| AT5G13790 | AT1G53860 | Activation |
| AT5G13790 | AT1G70210 | Activation |
| AT5G13790 | AT3G04320 | Activation |
| AT5G13790 | AT4G02210 | Activation |
| AT5G13790 | AT4G02800 | Activation |
| AT5G13790 | AT4G34160 | Activation |
| AT5G13790 | AT4G37110 | Activation |
| AT5G13790 | AT5G25580 | Activation |
| AT5G13790 | AT5G46910 | Activation |
| AT5G13790 | AT5G50180 | Activation |
| AT5G13790 | AT5G51850 | Activation |
| AT5G13790 | AT1G05070 | Activation |
| AT5G13790 | AT1G11000 | Activation |
| AT5G13790 | AT1G23000 | Activation |
| AT5G13790 | AT1G49320 | Activation |
| AT5G13790 | AT1G75190 | Activation |
| AT5G13790 | AT2G46710 | Activation |
| AT5G13790 | AT3G04730 | Activation |
| AT5G13790 | AT3G10740 | Activation |
| AT5G13790 | AT3G18035 | Activation |
| AT5G13790 | AT3G21550 | Activation |
| AT5G13790 | AT3G54820 | Activation |
| AT5G13790 | AT3G62100 | Activation |
| AT5G13790 | AT4G03210 | Activation |
| AT5G13790 | AT4G24670 | Activation |
| AT5G13790 | AT4G28400 | Activation |
| AT5G13790 | AT4G30090 | Activation |
| AT5G13790 | AT4G35070 | Activation |
| AT5G13790 | AT4G36700 | Activation |
| AT5G13790 | AT5G25180 | Activation |
| AT5G13790 | AT5G25210 | Activation |
| AT5G13790 | AT5G48800 | Activation |
| AT5G13790 | AT5G65910 | Activation |
| AT5G13790 | AT3G24650 | Activation |
| AT5G13790 | AT1G19220 | Activation |
| AT5G13790 | AT1G25550 | Activation |
| AT5G13790 | AT1G69010 | Activation |
| AT5G13790 | AT5G64340 | Activation |
| AT5G13790 | AT5G48560 | Activation |
| AT5G13790 | AT4G38620 | Activation |
| AT5G13790 | AT4G31800 | Activation |
| AT5G13790 | AT2G46590 | Activation |
| AT5G13790 | AT3G26790 | Activation |
| AT5G13790 | AT5G42630 | Activation |
| AT5G13790 | AT1G28300 | Activation |
| AT5G13790 | AT1G68670 | Activation |
| AT5G13790 | AT5G66300 | Activation |
| AT4G36920 | AT1G02070 | Activation |

|           |           |            |
|-----------|-----------|------------|
| AT4G36920 | AT1G02205 | Activation |
| AT4G36920 | AT1G03710 | Activation |
| AT4G36920 | AT1G11050 | Activation |
| AT4G36920 | AT1G11730 | Activation |
| AT4G36920 | AT1G13260 | Activation |
| AT4G36920 | AT1G14350 | Activation |
| AT4G36920 | AT1G19330 | Activation |
| AT4G36920 | AT1G19640 | Activation |
| AT4G36920 | AT1G24625 | Activation |
| AT4G36920 | AT1G27730 | Activation |
| AT4G36920 | AT1G29270 | Activation |
| AT4G36920 | AT1G34750 | Activation |
| AT4G36920 | AT1G35730 | Activation |
| AT4G36920 | AT1G35910 | Activation |
| AT4G36920 | AT1G49230 | Activation |
| AT4G36920 | AT1G50290 | Activation |
| AT4G36920 | AT1G66350 | Activation |
| AT4G36920 | AT1G69295 | Activation |
| AT4G36920 | AT1G70560 | Activation |
| AT4G36920 | AT1G72320 | Activation |
| AT4G36920 | AT1G72500 | Activation |
| AT4G36920 | AT1G73590 | Activation |
| AT4G36920 | AT1G73805 | Activation |
| AT4G36920 | AT2G14210 | Activation |
| AT4G36920 | AT2G15320 | Activation |
| AT4G36920 | AT2G21650 | Activation |
| AT4G36920 | AT2G22170 | Activation |
| AT4G36920 | AT2G22840 | Activation |
| AT4G36920 | AT2G26040 | Activation |
| AT4G36920 | AT2G28550 | Activation |
| AT4G36920 | AT2G31980 | Activation |
| AT4G36920 | AT2G35820 | Activation |
| AT4G36920 | AT2G38970 | Activation |
| AT4G36920 | AT2G40130 | Activation |
| AT4G36920 | AT2G40435 | Activation |
| AT4G36920 | AT2G41940 | Activation |
| AT4G36920 | AT2G41990 | Activation |
| AT4G36920 | AT2G42800 | Activation |
| AT4G36920 | AT2G42830 | Activation |
| AT4G36920 | AT2G42870 | Activation |
| AT4G36920 | AT2G43620 | Activation |
| AT4G36920 | AT2G45660 | Activation |
| AT4G36920 | AT2G45680 | Activation |
| AT4G36920 | AT2G46530 | Activation |
| AT4G36920 | AT2G48110 | Activation |
| AT4G36920 | AT3G04620 | Activation |
| AT4G36920 | AT3G05690 | Activation |
| AT4G36920 | AT3G07450 | Activation |
| AT4G36920 | AT3G11820 | Activation |
| AT4G36920 | AT3G12320 | Activation |
| AT4G36920 | AT3G16650 | Activation |
| AT4G36920 | AT3G19370 | Activation |

|           |           |            |
|-----------|-----------|------------|
| AT4G36920 | AT3G25905 | Activation |
| AT4G36920 | AT3G27770 | Activation |
| AT4G36920 | AT3G55980 | Activation |
| AT4G36920 | AT3G58780 | Activation |
| AT4G36920 | AT4G00730 | Activation |
| AT4G36920 | AT4G01120 | Activation |
| AT4G36920 | AT4G01250 | Activation |
| AT4G36920 | AT4G04630 | Activation |
| AT4G36920 | AT4G08950 | Activation |
| AT4G36920 | AT4G14130 | Activation |
| AT4G36920 | AT4G16490 | Activation |
| AT4G36920 | AT4G16770 | Activation |
| AT4G36920 | AT4G17670 | Activation |
| AT4G36920 | AT4G18960 | Activation |
| AT4G36920 | AT4G19240 | Activation |
| AT4G36920 | AT4G25420 | Activation |
| AT4G36920 | AT4G25480 | Activation |
| AT4G36920 | AT4G26690 | Activation |
| AT4G36920 | AT4G28560 | Activation |
| AT4G36920 | AT4G29190 | Activation |
| AT4G36920 | AT4G30490 | Activation |
| AT4G36920 | AT5G06530 | Activation |
| AT4G36920 | AT5G07030 | Activation |
| AT4G36920 | AT5G19140 | Activation |
| AT4G36920 | AT5G24710 | Activation |
| AT4G36920 | AT5G43680 | Activation |
| AT4G36920 | AT5G45160 | Activation |
| AT4G36920 | AT5G46340 | Activation |
| AT4G36920 | AT5G49120 | Activation |
| AT4G36920 | AT5G49360 | Activation |
| AT4G36920 | AT5G54470 | Activation |
| AT4G36920 | AT5G58900 | Activation |
| AT4G36920 | AT5G62000 | Activation |
| AT4G36920 | AT5G64220 | Activation |
| AT4G36920 | AT5G64640 | Activation |
| AT4G36920 | AT5G64870 | Activation |
| AT4G36920 | AT5G67060 | Activation |
| AT4G36920 | AT5G67180 | Activation |
| AT2G43010 | AT1G01070 | Activation |
| AT2G43010 | AT1G01110 | Activation |
| AT2G43010 | AT1G01260 | Activation |
| AT2G43010 | AT1G01320 | Activation |
| AT2G43010 | AT1G01390 | Activation |
| AT2G43010 | AT1G02205 | Activation |
| AT2G43010 | AT1G02230 | Activation |
| AT2G43010 | AT1G02250 | Activation |
| AT2G43010 | AT1G02340 | Activation |
| AT2G43010 | AT1G02350 | Activation |
| AT2G43010 | AT1G02360 | Activation |
| AT2G43010 | AT1G02400 | Activation |
| AT2G43010 | AT1G02660 | Activation |
| AT2G43010 | AT1G02800 | Activation |

|           |           |            |
|-----------|-----------|------------|
| AT2G43010 | AT1G02810 | Activation |
| AT2G43010 | AT1G02816 | Activation |
| AT2G43010 | AT1G03090 | Activation |
| AT2G43010 | AT1G03170 | Activation |
| AT2G43010 | AT1G03610 | Activation |
| AT2G43010 | AT1G03780 | Activation |
| AT2G43010 | AT1G03790 | Activation |
| AT2G43010 | AT1G03800 | Activation |
| AT2G43010 | AT1G03870 | Activation |
| AT2G43010 | AT1G03880 | Activation |
| AT2G43010 | AT1G04160 | Activation |
| AT2G43010 | AT1G04250 | Activation |
| AT2G43010 | AT1G04540 | Activation |
| AT2G43010 | AT1G05490 | Activation |
| AT2G43010 | AT1G05710 | Activation |
| AT2G43010 | AT1G05835 | Activation |
| AT2G43010 | AT1G06070 | Activation |
| AT2G43010 | AT1G06080 | Activation |
| AT2G43010 | AT1G06360 | Activation |
| AT2G43010 | AT1G06570 | Activation |
| AT2G43010 | AT1G06580 | Activation |
| AT2G43010 | AT1G06850 | Activation |
| AT2G43010 | AT1G06980 | Activation |
| AT2G43010 | AT1G07000 | Activation |
| AT2G43010 | AT1G07090 | Activation |
| AT2G43010 | AT1G07985 | Activation |
| AT2G43010 | AT1G08500 | Activation |
| AT2G43010 | AT1G08560 | Activation |
| AT2G43010 | AT1G09250 | Activation |
| AT2G43010 | AT1G09420 | Activation |
| AT2G43010 | AT1G10060 | Activation |
| AT2G43010 | AT1G10070 | Activation |
| AT2G43010 | AT1G10140 | Activation |
| AT2G43010 | AT1G10410 | Activation |
| AT2G43010 | AT1G10417 | Activation |
| AT2G43010 | AT1G10550 | Activation |
| AT2G43010 | AT1G10560 | Activation |
| AT2G43010 | AT1G11120 | Activation |
| AT2G43010 | AT1G11440 | Activation |
| AT2G43010 | AT1G11545 | Activation |
| AT2G43010 | AT1G11740 | Activation |
| AT2G43010 | AT1G12070 | Activation |
| AT2G43010 | AT1G12080 | Activation |
| AT2G43010 | AT1G12110 | Activation |
| AT2G43010 | AT1G12240 | Activation |
| AT2G43010 | AT1G12420 | Activation |
| AT2G43010 | AT1G12845 | Activation |
| AT2G43010 | AT1G13260 | Activation |
| AT2G43010 | AT1G13280 | Activation |
| AT2G43010 | AT1G14280 | Activation |
| AT2G43010 | AT1G14350 | Activation |
| AT2G43010 | AT1G14730 | Activation |



|           |           |            |
|-----------|-----------|------------|
| AT2G43010 | AT1G14870 | Activation |
| AT2G43010 | AT1G14880 | Activation |
| AT2G43010 | AT1G14920 | Activation |
| AT2G43010 | AT1G15010 | Activation |
| AT2G43010 | AT1G15100 | Activation |
| AT2G43010 | AT1G15210 | Activation |
| AT2G43010 | AT1G15330 | Activation |
| AT2G43010 | AT1G15350 | Activation |
| AT2G43010 | AT1G15550 | Activation |
| AT2G43010 | AT1G15800 | Activation |
| AT2G43010 | AT1G16290 | Activation |
| AT2G43010 | AT1G16300 | Activation |
| AT2G43010 | AT1G16850 | Activation |
| AT2G43010 | AT1G16858 | Activation |
| AT2G43010 | AT1G17400 | Activation |
| AT2G43010 | AT1G17500 | Activation |
| AT2G43010 | AT1G17620 | Activation |
| AT2G43010 | AT1G17830 | Activation |
| AT2G43010 | AT1G17840 | Activation |
| AT2G43010 | AT1G18280 | Activation |
| AT2G43010 | AT1G18290 | Activation |
| AT2G43010 | AT1G18400 | Activation |
| AT2G43010 | AT1G18570 | Activation |
| AT2G43010 | AT1G18580 | Activation |
| AT2G43010 | AT1G19180 | Activation |
| AT2G43010 | AT1G19300 | Activation |
| AT2G43010 | AT1G19320 | Activation |
| AT2G43010 | AT1G19450 | Activation |
| AT2G43010 | AT1G19840 | Activation |
| AT2G43010 | AT1G20010 | Activation |
| AT2G43010 | AT1G20070 | Activation |
| AT2G43010 | AT1G20190 | Activation |
| AT2G43010 | AT1G20440 | Activation |
| AT2G43010 | AT1G20450 | Activation |
| AT2G43010 | AT1G20610 | Activation |
| AT2G43010 | AT1G20620 | Activation |
| AT2G43010 | AT1G20790 | Activation |
| AT2G43010 | AT1G20900 | Activation |
| AT2G43010 | AT1G21050 | Activation |
| AT2G43010 | AT1G21060 | Activation |
| AT2G43010 | AT1G21140 | Activation |
| AT2G43010 | AT1G21400 | Activation |
| AT2G43010 | AT1G21910 | Activation |
| AT2G43010 | AT1G21980 | Activation |
| AT2G43010 | AT1G22065 | Activation |
| AT2G43010 | AT1G22360 | Activation |
| AT2G43010 | AT1G22470 | Activation |
| AT2G43010 | AT1G22530 | Activation |
| AT2G43010 | AT1G22740 | Activation |
| AT2G43010 | AT1G22910 | Activation |
| AT2G43010 | AT1G23040 | Activation |
| AT2G43010 | AT1G23060 | Activation |

|           |           |            |
|-----------|-----------|------------|
| AT2G43010 | AT1G23070 | Activation |
| AT2G43010 | AT1G23380 | Activation |
| AT2G43010 | AT1G23490 | Activation |
| AT2G43010 | AT1G24130 | Activation |
| AT2G43010 | AT1G25450 | Activation |
| AT2G43010 | AT1G26270 | Activation |
| AT2G43010 | AT1G26560 | Activation |
| AT2G43010 | AT1G26773 | Activation |
| AT2G43010 | AT1G26850 | Activation |
| AT2G43010 | AT1G26945 | Activation |
| AT2G43010 | AT1G27670 | Activation |
| AT2G43010 | AT1G28130 | Activation |
| AT2G43010 | AT1G28330 | Activation |
| AT2G43010 | AT1G28590 | Activation |
| AT2G43010 | AT1G29050 | Activation |
| AT2G43010 | AT1G29060 | Activation |
| AT2G43010 | AT1G29090 | Activation |
| AT2G43010 | AT1G29100 | Activation |
| AT2G43010 | AT1G29270 | Activation |
| AT2G43010 | AT1G29395 | Activation |
| AT2G43010 | AT1G29440 | Activation |
| AT2G43010 | AT1G29450 | Activation |
| AT2G43010 | AT1G29460 | Activation |
| AT2G43010 | AT1G29490 | Activation |
| AT2G43010 | AT1G29500 | Activation |
| AT2G43010 | AT1G29980 | Activation |
| AT2G43010 | AT1G30330 | Activation |
| AT2G43010 | AT1G30690 | Activation |
| AT2G43010 | AT1G32090 | Activation |
| AT2G43010 | AT1G32100 | Activation |
| AT2G43010 | AT1G32170 | Activation |
| AT2G43010 | AT1G32640 | Activation |
| AT2G43010 | AT1G33170 | Activation |
| AT2G43010 | AT1G33560 | Activation |
| AT2G43010 | AT1G34110 | Activation |
| AT2G43010 | AT1G34580 | Activation |
| AT2G43010 | AT1G34630 | Activation |
| AT2G43010 | AT1G35230 | Activation |
| AT2G43010 | AT1G35260 | Activation |
| AT2G43010 | AT1G36940 | Activation |
| AT2G43010 | AT1G44170 | Activation |
| AT2G43010 | AT1G44542 | Activation |
| AT2G43010 | AT1G44830 | Activation |
| AT2G43010 | AT1G45130 | Activation |
| AT2G43010 | AT1G48260 | Activation |
| AT2G43010 | AT1G49740 | Activation |
| AT2G43010 | AT1G51140 | Activation |
| AT2G43010 | AT1G51940 | Activation |
| AT2G43010 | AT1G52190 | Activation |
| AT2G43010 | AT1G52750 | Activation |
| AT2G43010 | AT1G52890 | Activation |
| AT2G43010 | AT1G53180 | Activation |

|           |           |            |
|-----------|-----------|------------|
| AT2G43010 | AT1G53450 | Activation |
| AT2G43010 | AT1G53830 | Activation |
| AT2G43010 | AT1G54100 | Activation |
| AT2G43010 | AT1G54200 | Activation |
| AT2G43010 | AT1G54420 | Activation |
| AT2G43010 | AT1G55330 | Activation |
| AT2G43010 | AT1G56210 | Activation |
| AT2G43010 | AT1G56650 | Activation |
| AT2G43010 | AT1G60060 | Activation |
| AT2G43010 | AT1G60190 | Activation |
| AT2G43010 | AT1G60440 | Activation |
| AT2G43010 | AT1G60450 | Activation |
| AT2G43010 | AT1G61260 | Activation |
| AT2G43010 | AT1G62370 | Activation |
| AT2G43010 | AT1G62380 | Activation |
| AT2G43010 | AT1G62480 | Activation |
| AT2G43010 | AT1G62760 | Activation |
| AT2G43010 | AT1G62770 | Activation |
| AT2G43010 | AT1G63840 | Activation |
| AT2G43010 | AT1G64110 | Activation |
| AT2G43010 | AT1G64380 | Activation |
| AT2G43010 | AT1G64390 | Activation |
| AT2G43010 | AT1G64625 | Activation |
| AT2G43010 | AT1G64640 | Activation |
| AT2G43010 | AT1G64650 | Activation |
| AT2G43010 | AT1G64660 | Activation |
| AT2G43010 | AT1G64670 | Activation |
| AT2G43010 | AT1G64710 | Activation |
| AT2G43010 | AT1G65920 | Activation |
| AT2G43010 | AT1G66350 | Activation |
| AT2G43010 | AT1G66400 | Activation |
| AT2G43010 | AT1G67050 | Activation |
| AT2G43010 | AT1G67265 | Activation |
| AT2G43010 | AT1G67270 | Activation |
| AT2G43010 | AT1G67360 | Activation |
| AT2G43010 | AT1G67590 | Activation |
| AT2G43010 | AT1G67750 | Activation |
| AT2G43010 | AT1G67900 | Activation |
| AT2G43010 | AT1G67920 | Activation |
| AT2G43010 | AT1G68560 | Activation |
| AT2G43010 | AT1G68620 | Activation |
| AT2G43010 | AT1G69030 | Activation |
| AT2G43010 | AT1G69040 | Activation |
| AT2G43010 | AT1G69160 | Activation |
| AT2G43010 | AT1G69260 | Activation |
| AT2G43010 | AT1G69295 | Activation |
| AT2G43010 | AT1G69526 | Activation |
| AT2G43010 | AT1G69570 | Activation |
| AT2G43010 | AT1G69600 | Activation |
| AT2G43010 | AT1G69690 | Activation |
| AT2G43010 | AT1G69770 | Activation |
| AT2G43010 | AT1G69890 | Activation |

|           |           |            |
|-----------|-----------|------------|
| AT2G43010 | AT1G70210 | Activation |
| AT2G43010 | AT1G70260 | Activation |
| AT2G43010 | AT1G70270 | Activation |
| AT2G43010 | AT1G70290 | Activation |
| AT2G43010 | AT1G70370 | Activation |
| AT2G43010 | AT1G70420 | Activation |
| AT2G43010 | AT1G70560 | Activation |
| AT2G43010 | AT1G70710 | Activation |
| AT2G43010 | AT1G70940 | Activation |
| AT2G43010 | AT1G71110 | Activation |
| AT2G43010 | AT1G71870 | Activation |
| AT2G43010 | AT1G71960 | Activation |
| AT2G43010 | AT1G72100 | Activation |
| AT2G43010 | AT1G72150 | Activation |
| AT2G43010 | AT1G72240 | Activation |
| AT2G43010 | AT1G72290 | Activation |
| AT2G43010 | AT1G72430 | Activation |
| AT2G43010 | AT1G72470 | Activation |
| AT2G43010 | AT1G72490 | Activation |
| AT2G43010 | AT1G73000 | Activation |
| AT2G43010 | AT1G73120 | Activation |
| AT2G43010 | AT1G73480 | Activation |
| AT2G43010 | AT1G73550 | Activation |
| AT2G43010 | AT1G73680 | Activation |
| AT2G43010 | AT1G74650 | Activation |
| AT2G43010 | AT1G74660 | Activation |
| AT2G43010 | AT1G75388 | Activation |
| AT2G43010 | AT1G75450 | Activation |
| AT2G43010 | AT1G75490 | Activation |
| AT2G43010 | AT1G75500 | Activation |
| AT2G43010 | AT1G75590 | Activation |
| AT2G43010 | AT1G75830 | Activation |
| AT2G43010 | AT1G76090 | Activation |
| AT2G43010 | AT1G76180 | Activation |
| AT2G43010 | AT1G76240 | Activation |
| AT2G43010 | AT1G76250 | Activation |
| AT2G43010 | AT1G76390 | Activation |
| AT2G43010 | AT1G76500 | Activation |
| AT2G43010 | AT1G76740 | Activation |
| AT2G43010 | AT1G77200 | Activation |
| AT2G43010 | AT1G77500 | Activation |
| AT2G43010 | AT1G78090 | Activation |
| AT2G43010 | AT1G78230 | Activation |
| AT2G43010 | AT1G78290 | Activation |
| AT2G43010 | AT1G78850 | Activation |
| AT2G43010 | AT1G78860 | Activation |
| AT2G43010 | AT1G78970 | Activation |
| AT2G43010 | AT1G79330 | Activation |
| AT2G43010 | AT1G79340 | Activation |
| AT2G43010 | AT1G79530 | Activation |
| AT2G43010 | AT1G80130 | Activation |
| AT2G43010 | AT1G80240 | Activation |

|           |           |            |
|-----------|-----------|------------|
| AT2G43010 | AT2G01150 | Activation |
| AT2G43010 | AT2G01450 | Activation |
| AT2G43010 | AT2G01570 | Activation |
| AT2G43010 | AT2G01610 | Activation |
| AT2G43010 | AT2G01900 | Activation |
| AT2G43010 | AT2G02170 | Activation |
| AT2G43010 | AT2G03720 | Activation |
| AT2G43010 | AT2G04240 | Activation |
| AT2G43010 | AT2G04500 | Activation |
| AT2G43010 | AT2G06200 | Activation |
| AT2G43010 | AT2G10940 | Activation |
| AT2G43010 | AT2G13650 | Activation |
| AT2G43010 | AT2G14890 | Activation |
| AT2G43010 | AT2G14900 | Activation |
| AT2G43010 | AT2G15830 | Activation |
| AT2G43010 | AT2G16365 | Activation |
| AT2G43010 | AT2G16720 | Activation |
| AT2G43010 | AT2G17290 | Activation |
| AT2G43010 | AT2G17500 | Activation |
| AT2G43010 | AT2G17730 | Activation |
| AT2G43010 | AT2G18010 | Activation |
| AT2G43010 | AT2G18170 | Activation |
| AT2G43010 | AT2G18690 | Activation |
| AT2G43010 | AT2G18700 | Activation |
| AT2G43010 | AT2G18790 | Activation |
| AT2G43010 | AT2G18950 | Activation |
| AT2G43010 | AT2G19450 | Activation |
| AT2G43010 | AT2G19660 | Activation |
| AT2G43010 | AT2G19810 | Activation |
| AT2G43010 | AT2G20370 | Activation |
| AT2G43010 | AT2G20515 | Activation |
| AT2G43010 | AT2G20670 | Activation |
| AT2G43010 | AT2G20680 | Activation |
| AT2G43010 | AT2G20750 | Activation |
| AT2G43010 | AT2G20760 | Activation |
| AT2G43010 | AT2G21200 | Activation |
| AT2G43010 | AT2G21510 | Activation |
| AT2G43010 | AT2G21660 | Activation |
| AT2G43010 | AT2G22122 | Activation |
| AT2G43010 | AT2G22170 | Activation |
| AT2G43010 | AT2G22500 | Activation |
| AT2G43010 | AT2G22620 | Activation |
| AT2G43010 | AT2G22840 | Activation |
| AT2G43010 | AT2G22900 | Activation |
| AT2G43010 | AT2G23150 | Activation |
| AT2G43010 | AT2G25625 | Activation |
| AT2G43010 | AT2G26440 | Activation |
| AT2G43010 | AT2G26690 | Activation |
| AT2G43010 | AT2G26695 | Activation |
| AT2G43010 | AT2G28056 | Activation |
| AT2G43010 | AT2G28190 | Activation |
| AT2G43010 | AT2G28200 | Activation |

|           |           |            |
|-----------|-----------|------------|
| AT2G43010 | AT2G28315 | Activation |
| AT2G43010 | AT2G28490 | Activation |
| AT2G43010 | AT2G28520 | Activation |
| AT2G43010 | AT2G28840 | Activation |
| AT2G43010 | AT2G29730 | Activation |
| AT2G43010 | AT2G29980 | Activation |
| AT2G43010 | AT2G30140 | Activation |
| AT2G43010 | AT2G30230 | Activation |
| AT2G43010 | AT2G31082 | Activation |
| AT2G43010 | AT2G31360 | Activation |
| AT2G43010 | AT2G31940 | Activation |
| AT2G43010 | AT2G32150 | Activation |
| AT2G43010 | AT2G32430 | Activation |
| AT2G43010 | AT2G33040 | Activation |
| AT2G43010 | AT2G33560 | Activation |
| AT2G43010 | AT2G34020 | Activation |
| AT2G43010 | AT2G34150 | Activation |
| AT2G43010 | AT2G34190 | Activation |
| AT2G43010 | AT2G34650 | Activation |
| AT2G43010 | AT2G34930 | Activation |
| AT2G43010 | AT2G35200 | Activation |
| AT2G43010 | AT2G35710 | Activation |
| AT2G43010 | AT2G35860 | Activation |
| AT2G43010 | AT2G35880 | Activation |
| AT2G43010 | AT2G36050 | Activation |
| AT2G43010 | AT2G36310 | Activation |
| AT2G43010 | AT2G36320 | Activation |
| AT2G43010 | AT2G36410 | Activation |
| AT2G43010 | AT2G36870 | Activation |
| AT2G43010 | AT2G37025 | Activation |
| AT2G43010 | AT2G37040 | Activation |
| AT2G43010 | AT2G37170 | Activation |
| AT2G43010 | AT2G37180 | Activation |
| AT2G43010 | AT2G37280 | Activation |
| AT2G43010 | AT2G37640 | Activation |
| AT2G43010 | AT2G37930 | Activation |
| AT2G43010 | AT2G37940 | Activation |
| AT2G43010 | AT2G38080 | Activation |
| AT2G43010 | AT2G38090 | Activation |
| AT2G43010 | AT2G38320 | Activation |
| AT2G43010 | AT2G38400 | Activation |
| AT2G43010 | AT2G38530 | Activation |
| AT2G43010 | AT2G39210 | Activation |
| AT2G43010 | AT2G39450 | Activation |
| AT2G43010 | AT2G39700 | Activation |
| AT2G43010 | AT2G39705 | Activation |
| AT2G43010 | AT2G39920 | Activation |
| AT2G43010 | AT2G39980 | Activation |
| AT2G43010 | AT2G40000 | Activation |
| AT2G43010 | AT2G40008 | Activation |
| AT2G43010 | AT2G40280 | Activation |
| AT2G43010 | AT2G40475 | Activation |

|           |           |            |
|-----------|-----------|------------|
| AT2G43010 | AT2G40540 | Activation |
| AT2G43010 | AT2G40610 | Activation |
| AT2G43010 | AT2G40970 | Activation |
| AT2G43010 | AT2G41070 | Activation |
| AT2G43010 | AT2G41110 | Activation |
| AT2G43010 | AT2G41310 | Activation |
| AT2G43010 | AT2G41410 | Activation |
| AT2G43010 | AT2G41630 | Activation |
| AT2G43010 | AT2G41640 | Activation |
| AT2G43010 | AT2G41740 | Activation |
| AT2G43010 | AT2G41750 | Activation |
| AT2G43010 | AT2G42010 | Activation |
| AT2G43010 | AT2G42150 | Activation |
| AT2G43010 | AT2G42570 | Activation |
| AT2G43010 | AT2G42610 | Activation |
| AT2G43010 | AT2G42800 | Activation |
| AT2G43010 | AT2G42870 | Activation |
| AT2G43010 | AT2G43010 | Activation |
| AT2G43010 | AT2G43050 | Activation |
| AT2G43010 | AT2G43060 | Activation |
| AT2G43010 | AT2G43140 | Activation |
| AT2G43010 | AT2G44080 | Activation |
| AT2G43010 | AT2G44490 | Activation |
| AT2G43010 | AT2G44798 | Activation |
| AT2G43010 | AT2G44910 | Activation |
| AT2G43010 | AT2G45040 | Activation |
| AT2G43010 | AT2G45210 | Activation |
| AT2G43010 | AT2G46170 | Activation |
| AT2G43010 | AT2G46600 | Activation |
| AT2G43010 | AT2G46660 | Activation |
| AT2G43010 | AT2G46680 | Activation |
| AT2G43010 | AT2G46780 | Activation |
| AT2G43010 | AT2G46790 | Activation |
| AT2G43010 | AT2G46830 | Activation |
| AT2G43010 | AT2G46970 | Activation |
| AT2G43010 | AT2G46980 | Activation |
| AT2G43010 | AT2G47000 | Activation |
| AT2G43010 | AT2G47010 | Activation |
| AT2G43010 | AT2G47060 | Activation |
| AT2G43010 | AT2G47160 | Activation |
| AT2G43010 | AT2G47500 | Activation |
| AT2G43010 | AT2G47770 | Activation |
| AT2G43010 | AT2G47780 | Activation |
| AT2G43010 | AT2G47940 | Activation |
| AT2G43010 | AT3G01513 | Activation |
| AT2G43010 | AT3G01516 | Activation |
| AT2G43010 | AT3G01750 | Activation |
| AT2G43010 | AT3G02120 | Activation |
| AT2G43010 | AT3G02170 | Activation |
| AT2G43010 | AT3G03170 | Activation |
| AT2G43010 | AT3G03820 | Activation |
| AT2G43010 | AT3G03830 | Activation |

|           |           |            |
|-----------|-----------|------------|
| AT2G43010 | AT3G03840 | Activation |
| AT2G43010 | AT3G03850 | Activation |
| AT2G43010 | AT3G04420 | Activation |
| AT2G43010 | AT3G04903 | Activation |
| AT2G43010 | AT3G05630 | Activation |
| AT2G43010 | AT3G05880 | Activation |
| AT2G43010 | AT3G05890 | Activation |
| AT2G43010 | AT3G05910 | Activation |
| AT2G43010 | AT3G05920 | Activation |
| AT2G43010 | AT3G06125 | Activation |
| AT2G43010 | AT3G06420 | Activation |
| AT2G43010 | AT3G06490 | Activation |
| AT2G43010 | AT3G06780 | Activation |
| AT2G43010 | AT3G07340 | Activation |
| AT2G43010 | AT3G07350 | Activation |
| AT2G43010 | AT3G08030 | Activation |
| AT2G43010 | AT3G08610 | Activation |
| AT2G43010 | AT3G09300 | Activation |
| AT2G43010 | AT3G09730 | Activation |
| AT2G43010 | AT3G10320 | Activation |
| AT2G43010 | AT3G10420 | Activation |
| AT2G43010 | AT3G11420 | Activation |
| AT2G43010 | AT3G12290 | Activation |
| AT2G43010 | AT3G12320 | Activation |
| AT2G43010 | AT3G12610 | Activation |
| AT2G43010 | AT3G12700 | Activation |
| AT2G43010 | AT3G12820 | Activation |
| AT2G43010 | AT3G12920 | Activation |
| AT2G43010 | AT3G13360 | Activation |
| AT2G43010 | AT3G13520 | Activation |
| AT2G43010 | AT3G13790 | Activation |
| AT2G43010 | AT3G13980 | Activation |
| AT2G43010 | AT3G14067 | Activation |
| AT2G43010 | AT3G14360 | Activation |
| AT2G43010 | AT3G14370 | Activation |
| AT2G43010 | AT3G14440 | Activation |
| AT2G43010 | AT3G14850 | Activation |
| AT2G43010 | AT3G14880 | Activation |
| AT2G43010 | AT3G15020 | Activation |
| AT2G43010 | AT3G15030 | Activation |
| AT2G43010 | AT3G15115 | Activation |
| AT2G43010 | AT3G15500 | Activation |
| AT2G43010 | AT3G15530 | Activation |
| AT2G43010 | AT3G15534 | Activation |
| AT2G43010 | AT3G15540 | Activation |
| AT2G43010 | AT3G15640 | Activation |
| AT2G43010 | AT3G16180 | Activation |
| AT2G43010 | AT3G16800 | Activation |
| AT2G43010 | AT3G17100 | Activation |
| AT2G43010 | AT3G17120 | Activation |
| AT2G43010 | AT3G17520 | Activation |
| AT2G43010 | AT3G17580 | Activation |



|           |           |            |
|-----------|-----------|------------|
| AT2G43010 | AT3G17810 | Activation |
| AT2G43010 | AT3G17820 | Activation |
| AT2G43010 | AT3G18060 | Activation |
| AT2G43010 | AT3G18535 | Activation |
| AT2G43010 | AT3G18710 | Activation |
| AT2G43010 | AT3G19390 | Activation |
| AT2G43010 | AT3G19580 | Activation |
| AT2G43010 | AT3G19590 | Activation |
| AT2G43010 | AT3G19680 | Activation |
| AT2G43010 | AT3G20340 | Activation |
| AT2G43010 | AT3G20810 | Activation |
| AT2G43010 | AT3G21320 | Activation |
| AT2G43010 | AT3G21330 | Activation |
| AT2G43010 | AT3G21550 | Activation |
| AT2G43010 | AT3G21560 | Activation |
| AT2G43010 | AT3G22400 | Activation |
| AT2G43010 | AT3G22840 | Activation |
| AT2G43010 | AT3G23030 | Activation |
| AT2G43010 | AT3G23090 | Activation |
| AT2G43010 | AT3G23730 | Activation |
| AT2G43010 | AT3G23810 | Activation |
| AT2G43010 | AT3G23820 | Activation |
| AT2G43010 | AT3G23890 | Activation |
| AT2G43010 | AT3G23930 | Activation |
| AT2G43010 | AT3G24715 | Activation |
| AT2G43010 | AT3G25727 | Activation |
| AT2G43010 | AT3G25730 | Activation |
| AT2G43010 | AT3G26170 | Activation |
| AT2G43010 | AT3G26180 | Activation |
| AT2G43010 | AT3G26520 | Activation |
| AT2G43010 | AT3G27170 | Activation |
| AT2G43010 | AT3G27690 | Activation |
| AT2G43010 | AT3G28180 | Activation |
| AT2G43010 | AT3G28340 | Activation |
| AT2G43010 | AT3G28857 | Activation |
| AT2G43010 | AT3G28910 | Activation |
| AT2G43010 | AT3G28958 | Activation |
| AT2G43010 | AT3G29360 | Activation |
| AT2G43010 | AT3G29370 | Activation |
| AT2G43010 | AT3G29575 | Activation |
| AT2G43010 | AT3G29670 | Activation |
| AT2G43010 | AT3G30180 | Activation |
| AT2G43010 | AT3G43190 | Activation |
| AT2G43010 | AT3G43270 | Activation |
| AT2G43010 | AT3G43960 | Activation |
| AT2G43010 | AT3G44300 | Activation |
| AT2G43010 | AT3G44610 | Activation |
| AT2G43010 | AT3G44735 | Activation |
| AT2G43010 | AT3G45300 | Activation |
| AT2G43010 | AT3G45600 | Activation |
| AT2G43010 | AT3G45610 | Activation |
| AT2G43010 | AT3G45780 | Activation |

|           |           |            |
|-----------|-----------|------------|
| AT2G43010 | AT3G45970 | Activation |
| AT2G43010 | AT3G47010 | Activation |
| AT2G43010 | AT3G47220 | Activation |
| AT2G43010 | AT3G47420 | Activation |
| AT2G43010 | AT3G48260 | Activation |
| AT2G43010 | AT3G48520 | Activation |
| AT2G43010 | AT3G49220 | Activation |
| AT2G43010 | AT3G49350 | Activation |
| AT2G43010 | AT3G49360 | Activation |
| AT2G43010 | AT3G49530 | Activation |
| AT2G43010 | AT3G49570 | Activation |
| AT2G43010 | AT3G49580 | Activation |
| AT2G43010 | AT3G49690 | Activation |
| AT2G43010 | AT3G49700 | Activation |
| AT2G43010 | AT3G49780 | Activation |
| AT2G43010 | AT3G49820 | Activation |
| AT2G43010 | AT3G49930 | Activation |
| AT2G43010 | AT3G50330 | Activation |
| AT2G43010 | AT3G50340 | Activation |
| AT2G43010 | AT3G50660 | Activation |
| AT2G43010 | AT3G50740 | Activation |
| AT2G43010 | AT3G50800 | Activation |
| AT2G43010 | AT3G50890 | Activation |
| AT2G43010 | AT3G51400 | Activation |
| AT2G43010 | AT3G51410 | Activation |
| AT2G43010 | AT3G51895 | Activation |
| AT2G43010 | AT3G52460 | Activation |
| AT2G43010 | AT3G52470 | Activation |
| AT2G43010 | AT3G53200 | Activation |
| AT2G43010 | AT3G53230 | Activation |
| AT2G43010 | AT3G53232 | Activation |
| AT2G43010 | AT3G53420 | Activation |
| AT2G43010 | AT3G53990 | Activation |
| AT2G43010 | AT3G54000 | Activation |
| AT2G43010 | AT3G54020 | Activation |
| AT2G43010 | AT3G54030 | Activation |
| AT2G43010 | AT3G54200 | Activation |
| AT2G43010 | AT3G54400 | Activation |
| AT2G43010 | AT3G54500 | Activation |
| AT2G43010 | AT3G54510 | Activation |
| AT2G43010 | AT3G54770 | Activation |
| AT2G43010 | AT3G54810 | Activation |
| AT2G43010 | AT3G54940 | Activation |
| AT2G43010 | AT3G54950 | Activation |
| AT2G43010 | AT3G54960 | Activation |
| AT2G43010 | AT3G55240 | Activation |
| AT2G43010 | AT3G55840 | Activation |
| AT2G43010 | AT3G56290 | Activation |
| AT2G43010 | AT3G56350 | Activation |
| AT2G43010 | AT3G57540 | Activation |
| AT2G43010 | AT3G58120 | Activation |
| AT2G43010 | AT3G58730 | Activation |

|           |           |            |
|-----------|-----------|------------|
| AT2G43010 | AT3G58850 | Activation |
| AT2G43010 | AT3G59060 | Activation |
| AT2G43010 | AT3G59765 | Activation |
| AT2G43010 | AT3G59900 | Activation |
| AT2G43010 | AT3G59930 | Activation |
| AT2G43010 | AT3G60390 | Activation |
| AT2G43010 | AT3G60520 | Activation |
| AT2G43010 | AT3G60530 | Activation |
| AT2G43010 | AT3G61430 | Activation |
| AT2G43010 | AT3G61460 | Activation |
| AT2G43010 | AT3G61640 | Activation |
| AT2G43010 | AT3G61680 | Activation |
| AT2G43010 | AT3G61820 | Activation |
| AT2G43010 | AT3G61930 | Activation |
| AT2G43010 | AT3G62090 | Activation |
| AT2G43010 | AT3G62570 | Activation |
| AT2G43010 | AT3G62680 | Activation |
| AT2G43010 | AT3G63350 | Activation |
| AT2G43010 | AT3G63430 | Activation |
| AT2G43010 | AT4G00150 | Activation |
| AT2G43010 | AT4G00820 | Activation |
| AT2G43010 | AT4G01250 | Activation |
| AT2G43010 | AT4G01335 | Activation |
| AT2G43010 | AT4G01410 | Activation |
| AT2G43010 | AT4G01510 | Activation |
| AT2G43010 | AT4G01680 | Activation |
| AT2G43010 | AT4G02075 | Activation |
| AT2G43010 | AT4G02090 | Activation |
| AT2G43010 | AT4G02100 | Activation |
| AT2G43010 | AT4G02290 | Activation |
| AT2G43010 | AT4G03190 | Activation |
| AT2G43010 | AT4G03320 | Activation |
| AT2G43010 | AT4G03330 | Activation |
| AT2G43010 | AT4G05190 | Activation |
| AT2G43010 | AT4G06744 | Activation |
| AT2G43010 | AT4G08160 | Activation |
| AT2G43010 | AT4G08950 | Activation |
| AT2G43010 | AT4G09030 | Activation |
| AT2G43010 | AT4G09890 | Activation |
| AT2G43010 | AT4G10020 | Activation |
| AT2G43010 | AT4G10240 | Activation |
| AT2G43010 | AT4G10250 | Activation |
| AT2G43010 | AT4G10560 | Activation |
| AT2G43010 | AT4G11010 | Activation |
| AT2G43010 | AT4G11020 | Activation |
| AT2G43010 | AT4G11050 | Activation |
| AT2G43010 | AT4G11610 | Activation |
| AT2G43010 | AT4G11820 | Activation |
| AT2G43010 | AT4G12410 | Activation |
| AT2G43010 | AT4G12730 | Activation |
| AT2G43010 | AT4G13395 | Activation |
| AT2G43010 | AT4G13540 | Activation |

|           |           |            |
|-----------|-----------|------------|
| AT2G43010 | AT4G13790 | Activation |
| AT2G43010 | AT4G13930 | Activation |
| AT2G43010 | AT4G14130 | Activation |
| AT2G43010 | AT4G14140 | Activation |
| AT2G43010 | AT4G14465 | Activation |
| AT2G43010 | AT4G14550 | Activation |
| AT2G43010 | AT4G14560 | Activation |
| AT2G43010 | AT4G14690 | Activation |
| AT2G43010 | AT4G14746 | Activation |
| AT2G43010 | AT4G14750 | Activation |
| AT2G43010 | AT4G14905 | Activation |
| AT2G43010 | AT4G15160 | Activation |
| AT2G43010 | AT4G15230 | Activation |
| AT2G43010 | AT4G15550 | Activation |
| AT2G43010 | AT4G15700 | Activation |
| AT2G43010 | AT4G16260 | Activation |
| AT2G43010 | AT4G16500 | Activation |
| AT2G43010 | AT4G16515 | Activation |
| AT2G43010 | AT4G16745 | Activation |
| AT2G43010 | AT4G16750 | Activation |
| AT2G43010 | AT4G16770 | Activation |
| AT2G43010 | AT4G16780 | Activation |
| AT2G43010 | AT4G17280 | Activation |
| AT2G43010 | AT4G17420 | Activation |
| AT2G43010 | AT4G17670 | Activation |
| AT2G43010 | AT4G17695 | Activation |
| AT2G43010 | AT4G18550 | Activation |
| AT2G43010 | AT4G19120 | Activation |
| AT2G43010 | AT4G19170 | Activation |
| AT2G43010 | AT4G19420 | Activation |
| AT2G43010 | AT4G20362 | Activation |
| AT2G43010 | AT4G21745 | Activation |
| AT2G43010 | AT4G21926 | Activation |
| AT2G43010 | AT4G22010 | Activation |
| AT2G43010 | AT4G22490 | Activation |
| AT2G43010 | AT4G22780 | Activation |
| AT2G43010 | AT4G22810 | Activation |
| AT2G43010 | AT4G23060 | Activation |
| AT2G43010 | AT4G23440 | Activation |
| AT2G43010 | AT4G23500 | Activation |
| AT2G43010 | AT4G23820 | Activation |
| AT2G43010 | AT4G23870 | Activation |
| AT2G43010 | AT4G24150 | Activation |
| AT2G43010 | AT4G25020 | Activation |
| AT2G43010 | AT4G25260 | Activation |
| AT2G43010 | AT4G25280 | Activation |
| AT2G43010 | AT4G25380 | Activation |
| AT2G43010 | AT4G25470 | Activation |
| AT2G43010 | AT4G25580 | Activation |
| AT2G43010 | AT4G25620 | Activation |
| AT2G43010 | AT4G25640 | Activation |
| AT2G43010 | AT4G25760 | Activation |

|           |           |            |
|-----------|-----------|------------|
| AT2G43010 | AT4G26940 | Activation |
| AT2G43010 | AT4G27260 | Activation |
| AT2G43010 | AT4G27310 | Activation |
| AT2G43010 | AT4G27435 | Activation |
| AT2G43010 | AT4G27450 | Activation |
| AT2G43010 | AT4G27460 | Activation |
| AT2G43010 | AT4G27657 | Activation |
| AT2G43010 | AT4G27970 | Activation |
| AT2G43010 | AT4G28530 | Activation |
| AT2G43010 | AT4G28650 | Activation |
| AT2G43010 | AT4G28720 | Activation |
| AT2G43010 | AT4G29130 | Activation |
| AT2G43010 | AT4G29140 | Activation |
| AT2G43010 | AT4G29190 | Activation |
| AT2G43010 | AT4G29270 | Activation |
| AT2G43010 | AT4G29520 | Activation |
| AT2G43010 | AT4G29700 | Activation |
| AT2G43010 | AT4G29900 | Activation |
| AT2G43010 | AT4G30080 | Activation |
| AT2G43010 | AT4G30170 | Activation |
| AT2G43010 | AT4G30180 | Activation |
| AT2G43010 | AT4G30370 | Activation |
| AT2G43010 | AT4G30400 | Activation |
| AT2G43010 | AT4G30410 | Activation |
| AT2G43010 | AT4G30420 | Activation |
| AT2G43010 | AT4G30430 | Activation |
| AT2G43010 | AT4G30650 | Activation |
| AT2G43010 | AT4G30660 | Activation |
| AT2G43010 | AT4G31370 | Activation |
| AT2G43010 | AT4G31380 | Activation |
| AT2G43010 | AT4G32070 | Activation |
| AT2G43010 | AT4G32280 | Activation |
| AT2G43010 | AT4G32810 | Activation |
| AT2G43010 | AT4G32870 | Activation |
| AT2G43010 | AT4G33040 | Activation |
| AT2G43010 | AT4G33467 | Activation |
| AT2G43010 | AT4G33560 | Activation |
| AT2G43010 | AT4G34000 | Activation |
| AT2G43010 | AT4G34230 | Activation |
| AT2G43010 | AT4G34760 | Activation |
| AT2G43010 | AT4G34770 | Activation |
| AT2G43010 | AT4G35060 | Activation |
| AT2G43010 | AT4G35070 | Activation |
| AT2G43010 | AT4G35110 | Activation |
| AT2G43010 | AT4G35190 | Activation |
| AT2G43010 | AT4G35480 | Activation |
| AT2G43010 | AT4G35500 | Activation |
| AT2G43010 | AT4G35720 | Activation |
| AT2G43010 | AT4G35750 | Activation |
| AT2G43010 | AT4G35770 | Activation |
| AT2G43010 | AT4G36010 | Activation |
| AT2G43010 | AT4G36040 | Activation |

|           |           |            |
|-----------|-----------|------------|
| AT2G43010 | AT4G36110 | Activation |
| AT2G43010 | AT4G36120 | Activation |
| AT2G43010 | AT4G36360 | Activation |
| AT2G43010 | AT4G36380 | Activation |
| AT2G43010 | AT4G36790 | Activation |
| AT2G43010 | AT4G36910 | Activation |
| AT2G43010 | AT4G37070 | Activation |
| AT2G43010 | AT4G37240 | Activation |
| AT2G43010 | AT4G37580 | Activation |
| AT2G43010 | AT4G37740 | Activation |
| AT2G43010 | AT4G37770 | Activation |
| AT2G43010 | AT4G38580 | Activation |
| AT2G43010 | AT4G38850 | Activation |
| AT2G43010 | AT4G38860 | Activation |
| AT2G43010 | AT4G39070 | Activation |
| AT2G43010 | AT4G39210 | Activation |
| AT2G43010 | AT4G39360 | Activation |
| AT2G43010 | AT4G39390 | Activation |
| AT2G43010 | AT4G39404 | Activation |
| AT2G43010 | AT4G39840 | Activation |
| AT2G43010 | AT5G01250 | Activation |
| AT2G43010 | AT5G01445 | Activation |
| AT2G43010 | AT5G01520 | Activation |
| AT2G43010 | AT5G01600 | Activation |
| AT2G43010 | AT5G01740 | Activation |
| AT2G43010 | AT5G01790 | Activation |
| AT2G43010 | AT5G01820 | Activation |
| AT2G43010 | AT5G02180 | Activation |
| AT2G43010 | AT5G02190 | Activation |
| AT2G43010 | AT5G02200 | Activation |
| AT2G43010 | AT5G02230 | Activation |
| AT2G43010 | AT5G02260 | Activation |
| AT2G43010 | AT5G02540 | Activation |
| AT2G43010 | AT5G02550 | Activation |
| AT2G43010 | AT5G02580 | Activation |
| AT2G43010 | AT5G02760 | Activation |
| AT2G43010 | AT5G03050 | Activation |
| AT2G43010 | AT5G03120 | Activation |
| AT2G43010 | AT5G03140 | Activation |
| AT2G43010 | AT5G03150 | Activation |
| AT2G43010 | AT5G03180 | Activation |
| AT2G43010 | AT5G03210 | Activation |
| AT2G43010 | AT5G03760 | Activation |
| AT2G43010 | AT5G04120 | Activation |
| AT2G43010 | AT5G04190 | Activation |
| AT2G43010 | AT5G04340 | Activation |
| AT2G43010 | AT5G04470 | Activation |
| AT2G43010 | AT5G04530 | Activation |
| AT2G43010 | AT5G04770 | Activation |
| AT2G43010 | AT5G05180 | Activation |
| AT2G43010 | AT5G05965 | Activation |
| AT2G43010 | AT5G06200 | Activation |

|           |           |            |
|-----------|-----------|------------|
| AT2G43010 | AT5G06720 | Activation |
| AT2G43010 | AT5G06930 | Activation |
| AT2G43010 | AT5G06980 | Activation |
| AT2G43010 | AT5G07000 | Activation |
| AT2G43010 | AT5G07010 | Activation |
| AT2G43010 | AT5G07030 | Activation |
| AT2G43010 | AT5G07200 | Activation |
| AT2G43010 | AT5G07270 | Activation |
| AT2G43010 | AT5G07920 | Activation |
| AT2G43010 | AT5G07990 | Activation |
| AT2G43010 | AT5G08130 | Activation |
| AT2G43010 | AT5G09440 | Activation |
| AT2G43010 | AT5G09810 | Activation |
| AT2G43010 | AT5G09970 | Activation |
| AT2G43010 | AT5G10100 | Activation |
| AT2G43010 | AT5G10430 | Activation |
| AT2G43010 | AT5G10930 | Activation |
| AT2G43010 | AT5G10990 | Activation |
| AT2G43010 | AT5G11000 | Activation |
| AT2G43010 | AT5G11100 | Activation |
| AT2G43010 | AT5G11260 | Activation |
| AT2G43010 | AT5G11520 | Activation |
| AT2G43010 | AT5G11650 | Activation |
| AT2G43010 | AT5G11670 | Activation |
| AT2G43010 | AT5G11740 | Activation |
| AT2G43010 | AT5G11970 | Activation |
| AT2G43010 | AT5G12250 | Activation |
| AT2G43010 | AT5G13150 | Activation |
| AT2G43010 | AT5G13170 | Activation |
| AT2G43010 | AT5G13820 | Activation |
| AT2G43010 | AT5G13990 | Activation |
| AT2G43010 | AT5G14230 | Activation |
| AT2G43010 | AT5G14360 | Activation |
| AT2G43010 | AT5G14780 | Activation |
| AT2G43010 | AT5G14790 | Activation |
| AT2G43010 | AT5G14920 | Activation |
| AT2G43010 | AT5G15150 | Activation |
| AT2G43010 | AT5G15160 | Activation |
| AT2G43010 | AT5G15230 | Activation |
| AT2G43010 | AT5G15265 | Activation |
| AT2G43010 | AT5G15420 | Activation |
| AT2G43010 | AT5G15580 | Activation |
| AT2G43010 | AT5G15860 | Activation |
| AT2G43010 | AT5G15870 | Activation |
| AT2G43010 | AT5G16023 | Activation |
| AT2G43010 | AT5G16570 | Activation |
| AT2G43010 | AT5G16590 | Activation |
| AT2G43010 | AT5G16910 | Activation |
| AT2G43010 | AT5G17160 | Activation |
| AT2G43010 | AT5G17165 | Activation |
| AT2G43010 | AT5G18010 | Activation |
| AT2G43010 | AT5G18020 | Activation |

|           |           |            |
|-----------|-----------|------------|
| AT2G43010 | AT5G18030 | Activation |
| AT2G43010 | AT5G18050 | Activation |
| AT2G43010 | AT5G18060 | Activation |
| AT2G43010 | AT5G18080 | Activation |
| AT2G43010 | AT5G18690 | Activation |
| AT2G43010 | AT5G19110 | Activation |
| AT2G43010 | AT5G19140 | Activation |
| AT2G43010 | AT5G19810 | Activation |
| AT2G43010 | AT5G20700 | Activation |
| AT2G43010 | AT5G20710 | Activation |
| AT2G43010 | AT5G21950 | Activation |
| AT2G43010 | AT5G22500 | Activation |
| AT2G43010 | AT5G22740 | Activation |
| AT2G43010 | AT5G23020 | Activation |
| AT2G43010 | AT5G23210 | Activation |
| AT2G43010 | AT5G23350 | Activation |
| AT2G43010 | AT5G23860 | Activation |
| AT2G43010 | AT5G23870 | Activation |
| AT2G43010 | AT5G24030 | Activation |
| AT2G43010 | AT5G24870 | Activation |
| AT2G43010 | AT5G24910 | Activation |
| AT2G43010 | AT5G25110 | Activation |
| AT2G43010 | AT5G25190 | Activation |
| AT2G43010 | AT5G25200 | Activation |
| AT2G43010 | AT5G25240 | Activation |
| AT2G43010 | AT5G25460 | Activation |
| AT2G43010 | AT5G25620 | Activation |
| AT2G43010 | AT5G25810 | Activation |
| AT2G43010 | AT5G25820 | Activation |
| AT2G43010 | AT5G26140 | Activation |
| AT2G43010 | AT5G27220 | Activation |
| AT2G43010 | AT5G27520 | Activation |
| AT2G43010 | AT5G28050 | Activation |
| AT2G43010 | AT5G28150 | Activation |
| AT2G43010 | AT5G28300 | Activation |
| AT2G43010 | AT5G28630 | Activation |
| AT2G43010 | AT5G35525 | Activation |
| AT2G43010 | AT5G37010 | Activation |
| AT2G43010 | AT5G38700 | Activation |
| AT2G43010 | AT5G39240 | Activation |
| AT2G43010 | AT5G39850 | Activation |
| AT2G43010 | AT5G39860 | Activation |
| AT2G43010 | AT5G40630 | Activation |
| AT2G43010 | AT5G41080 | Activation |
| AT2G43010 | AT5G41460 | Activation |
| AT2G43010 | AT5G42690 | Activation |
| AT2G43010 | AT5G43150 | Activation |
| AT2G43010 | AT5G43700 | Activation |
| AT2G43010 | AT5G44020 | Activation |
| AT2G43010 | AT5G44210 | Activation |
| AT2G43010 | AT5G44260 | Activation |
| AT2G43010 | AT5G44440 | Activation |



|           |           |            |
|-----------|-----------|------------|
| AT2G43010 | AT5G44460 | Activation |
| AT2G43010 | AT5G45350 | Activation |
| AT2G43010 | AT5G45380 | Activation |
| AT2G43010 | AT5G45830 | Activation |
| AT2G43010 | AT5G46180 | Activation |
| AT2G43010 | AT5G46240 | Activation |
| AT2G43010 | AT5G47060 | Activation |
| AT2G43010 | AT5G47240 | Activation |
| AT2G43010 | AT5G47370 | Activation |
| AT2G43010 | AT5G47740 | Activation |
| AT2G43010 | AT5G48250 | Activation |
| AT2G43010 | AT5G48450 | Activation |
| AT2G43010 | AT5G48460 | Activation |
| AT2G43010 | AT5G48890 | Activation |
| AT2G43010 | AT5G48900 | Activation |
| AT2G43010 | AT5G49280 | Activation |
| AT2G43010 | AT5G49360 | Activation |
| AT2G43010 | AT5G49370 | Activation |
| AT2G43010 | AT5G49690 | Activation |
| AT2G43010 | AT5G49800 | Activation |
| AT2G43010 | AT5G50335 | Activation |
| AT2G43010 | AT5G50890 | Activation |
| AT2G43010 | AT5G51210 | Activation |
| AT2G43010 | AT5G51460 | Activation |
| AT2G43010 | AT5G52900 | Activation |
| AT2G43010 | AT5G53660 | Activation |
| AT2G43010 | AT5G53970 | Activation |
| AT2G43010 | AT5G53980 | Activation |
| AT2G43010 | AT5G54160 | Activation |
| AT2G43010 | AT5G54190 | Activation |
| AT2G43010 | AT5G54470 | Activation |
| AT2G43010 | AT5G54530 | Activation |
| AT2G43010 | AT5G54585 | Activation |
| AT2G43010 | AT5G54590 | Activation |
| AT2G43010 | AT5G54670 | Activation |
| AT2G43010 | AT5G54970 | Activation |
| AT2G43010 | AT5G55090 | Activation |
| AT2G43010 | AT5G55830 | Activation |
| AT2G43010 | AT5G55960 | Activation |
| AT2G43010 | AT5G56490 | Activation |
| AT2G43010 | AT5G56980 | Activation |
| AT2G43010 | AT5G57655 | Activation |
| AT2G43010 | AT5G57660 | Activation |
| AT2G43010 | AT5G57670 | Activation |
| AT2G43010 | AT5G57780 | Activation |
| AT2G43010 | AT5G58465 | Activation |
| AT2G43010 | AT5G58520 | Activation |
| AT2G43010 | AT5G58600 | Activation |
| AT2G43010 | AT5G58660 | Activation |
| AT2G43010 | AT5G59010 | Activation |
| AT2G43010 | AT5G59220 | Activation |
| AT2G43010 | AT5G59490 | Activation |

|           |           |            |
|-----------|-----------|------------|
| AT2G43010 | AT5G59510 | Activation |
| AT2G43010 | AT5G59540 | Activation |
| AT2G43010 | AT5G59870 | Activation |
| AT2G43010 | AT5G59880 | Activation |
| AT2G43010 | AT5G60460 | Activation |
| AT2G43010 | AT5G60680 | Activation |
| AT2G43010 | AT5G60760 | Activation |
| AT2G43010 | AT5G60840 | Activation |
| AT2G43010 | AT5G60850 | Activation |
| AT2G43010 | AT5G60860 | Activation |
| AT2G43010 | AT5G61660 | Activation |
| AT2G43010 | AT5G61820 | Activation |
| AT2G43010 | AT5G62280 | Activation |
| AT2G43010 | AT5G63350 | Activation |
| AT2G43010 | AT5G63450 | Activation |
| AT2G43010 | AT5G63650 | Activation |
| AT2G43010 | AT5G63660 | Activation |
| AT2G43010 | AT5G63800 | Activation |
| AT2G43010 | AT5G63810 | Activation |
| AT2G43010 | AT5G64260 | Activation |
| AT2G43010 | AT5G64300 | Activation |
| AT2G43010 | AT5G64310 | Activation |
| AT2G43010 | AT5G64870 | Activation |
| AT2G43010 | AT5G65140 | Activation |
| AT2G43010 | AT5G65300 | Activation |
| AT2G43010 | AT5G65380 | Activation |
| AT2G43010 | AT5G65390 | Activation |
| AT2G43010 | AT5G65430 | Activation |
| AT2G43010 | AT5G65470 | Activation |
| AT2G43010 | AT5G65790 | Activation |
| AT2G43010 | AT5G65800 | Activation |
| AT2G43010 | AT5G65810 | Activation |
| AT2G43010 | AT5G65980 | Activation |
| AT2G43010 | AT5G66080 | Activation |
| AT2G43010 | AT5G66110 | Activation |
| AT2G43010 | AT5G66230 | Activation |
| AT2G43010 | AT5G66580 | Activation |
| AT2G43010 | AT5G66590 | Activation |
| AT2G43010 | AT5G66690 | Activation |
| AT2G43010 | AT5G66700 | Activation |
| AT2G43010 | AT5G66760 | Activation |
| AT2G43010 | AT5G66920 | Activation |
| AT2G43010 | AT5G67020 | Activation |
| AT2G43010 | AT5G67310 | Activation |
| AT2G43010 | AT5G67390 | Activation |
| AT2G43010 | AT5G67400 | Activation |
| AT2G43010 | AT5G67480 | Activation |
| AT5G61850 | AT1G01170 | Activation |
| AT5G61850 | AT1G01180 | Activation |
| AT5G61850 | AT1G01183 | Activation |
| AT5G61850 | AT1G01490 | Activation |
| AT5G61850 | AT1G01500 | Activation |

|           |           |            |
|-----------|-----------|------------|
| AT5G61850 | AT1G01610 | Activation |
| AT5G61850 | AT1G01620 | Activation |
| AT5G61850 | AT1G01630 | Activation |
| AT5G61850 | AT1G01670 | Activation |
| AT5G61850 | AT1G01680 | Activation |
| AT5G61850 | AT1G01710 | Activation |
| AT5G61850 | AT1G01720 | Activation |
| AT5G61850 | AT1G02180 | Activation |
| AT5G61850 | AT1G02190 | Activation |
| AT5G61850 | AT1G02228 | Activation |
| AT5G61850 | AT1G02230 | Activation |
| AT5G61850 | AT1G02335 | Activation |
| AT5G61850 | AT1G02340 | Activation |
| AT5G61850 | AT1G02350 | Activation |
| AT5G61850 | AT1G02360 | Activation |
| AT5G61850 | AT1G02630 | Activation |
| AT5G61850 | AT1G02640 | Activation |
| AT5G61850 | AT1G03190 | Activation |
| AT5G61850 | AT1G03200 | Activation |
| AT5G61850 | AT1G03240 | Activation |
| AT5G61850 | AT1G03250 | Activation |
| AT5G61850 | AT1G03280 | Activation |
| AT5G61850 | AT1G03290 | Activation |
| AT5G61850 | AT1G03850 | Activation |
| AT5G61850 | AT1G03860 | Activation |
| AT5G61850 | AT1G04150 | Activation |
| AT5G61850 | AT1G04160 | Activation |
| AT5G61850 | AT1G04250 | Activation |
| AT5G61850 | AT1G05010 | Activation |
| AT5G61850 | AT1G05020 | Activation |
| AT5G61850 | AT1G05430 | Activation |
| AT5G61850 | AT1G05440 | Activation |
| AT5G61850 | AT1G05750 | Activation |
| AT5G61850 | AT1G05770 | Activation |
| AT5G61850 | AT1G05790 | Activation |
| AT5G61850 | AT1G05800 | Activation |
| AT5G61850 | AT1G05970 | Activation |
| AT5G61850 | AT1G05980 | Activation |
| AT5G61850 | AT1G05990 | Activation |
| AT5G61850 | AT1G06148 | Activation |
| AT5G61850 | AT1G06400 | Activation |
| AT5G61850 | AT1G06410 | Activation |
| AT5G61850 | AT1G06990 | Activation |
| AT5G61850 | AT1G07000 | Activation |
| AT5G61850 | AT1G07010 | Activation |
| AT5G61850 | AT1G07200 | Activation |
| AT5G61850 | AT1G07210 | Activation |
| AT5G61850 | AT1G07280 | Activation |
| AT5G61850 | AT1G07380 | Activation |
| AT5G61850 | AT1G07390 | Activation |
| AT5G61850 | AT1G07440 | Activation |
| AT5G61850 | AT1G07450 | Activation |

|           |           |            |
|-----------|-----------|------------|
| AT5G61850 | AT1G07460 | Activation |
| AT5G61850 | AT1G07520 | Activation |
| AT5G61850 | AT1G07530 | Activation |
| AT5G61850 | AT1G07540 | Activation |
| AT5G61850 | AT1G07550 | Activation |
| AT5G61850 | AT1G07570 | Activation |
| AT5G61850 | AT1G07580 | Activation |
| AT5G61850 | AT1G07620 | Activation |
| AT5G61850 | AT1G07630 | Activation |
| AT5G61850 | AT1G07640 | Activation |
| AT5G61850 | AT1G07650 | Activation |
| AT5G61850 | AT1G07900 | Activation |
| AT5G61850 | AT1G07901 | Activation |
| AT5G61850 | AT1G08240 | Activation |
| AT5G61850 | AT1G08250 | Activation |
| AT5G61850 | AT1G08260 | Activation |
| AT5G61850 | AT1G08370 | Activation |
| AT5G61850 | AT1G08380 | Activation |
| AT5G61850 | AT1G08390 | Activation |
| AT5G61850 | AT1G08650 | Activation |
| AT5G61850 | AT1G08660 | Activation |
| AT5G61850 | AT1G08920 | Activation |
| AT5G61850 | AT1G08930 | Activation |
| AT5G61850 | AT1G08985 | Activation |
| AT5G61850 | AT1G08990 | Activation |
| AT5G61850 | AT1G09000 | Activation |
| AT5G61850 | AT1G09130 | Activation |
| AT5G61850 | AT1G09140 | Activation |
| AT5G61850 | AT1G09150 | Activation |
| AT5G61850 | AT1G09155 | Activation |
| AT5G61850 | AT1G09157 | Activation |
| AT5G61850 | AT1G09340 | Activation |
| AT5G61850 | AT1G09350 | Activation |
| AT5G61850 | AT1G09650 | Activation |
| AT5G61850 | AT1G09660 | Activation |
| AT5G61850 | AT1G09950 | Activation |
| AT5G61850 | AT1G09960 | Activation |
| AT5G61850 | AT1G09980 | Activation |
| AT5G61850 | AT1G09995 | Activation |
| AT5G61850 | AT1G10000 | Activation |
| AT5G61850 | AT1G10090 | Activation |
| AT5G61850 | AT1G10095 | Activation |
| AT5G61850 | AT1G10200 | Activation |
| AT5G61850 | AT1G10210 | Activation |
| AT5G61850 | AT1G10280 | Activation |
| AT5G61850 | AT1G10290 | Activation |
| AT5G61850 | AT1G10652 | Activation |
| AT5G61850 | AT1G10657 | Activation |
| AT5G61850 | AT1G10747 | Activation |
| AT5G61850 | AT1G10750 | Activation |
| AT5G61850 | AT1G10840 | Activation |
| AT5G61850 | AT1G10850 | Activation |

|           |           |            |
|-----------|-----------|------------|
| AT5G61850 | AT1G10865 | Activation |
| AT5G61850 | AT1G10870 | Activation |
| AT5G61850 | AT1G11260 | Activation |
| AT5G61850 | AT1G11310 | Activation |
| AT5G61850 | AT1G11320 | Activation |
| AT5G61850 | AT1G11360 | Activation |
| AT5G61850 | AT1G11362 | Activation |
| AT5G61850 | AT1G11700 | Activation |
| AT5G61850 | AT1G11780 | Activation |
| AT5G61850 | AT1G11785 | Activation |
| AT5G61850 | AT1G12100 | Activation |
| AT5G61850 | AT1G12120 | Activation |
| AT5G61850 | AT1G12190 | Activation |
| AT5G61850 | AT1G12200 | Activation |
| AT5G61850 | AT1G12423 | Activation |
| AT5G61850 | AT1G12430 | Activation |
| AT5G61850 | AT1G12440 | Activation |
| AT5G61850 | AT1G12450 | Activation |
| AT5G61850 | AT1G13000 | Activation |
| AT5G61850 | AT1G13010 | Activation |
| AT5G61850 | AT1G13260 | Activation |
| AT5G61850 | AT1G13360 | Activation |
| AT5G61850 | AT1G13830 | Activation |
| AT5G61850 | AT1G13840 | Activation |
| AT5G61850 | AT1G13920 | Activation |
| AT5G61850 | AT1G13930 | Activation |
| AT5G61850 | AT1G14315 | Activation |
| AT5G61850 | AT1G14320 | Activation |
| AT5G61850 | AT1G14360 | Activation |
| AT5G61850 | AT1G14370 | Activation |
| AT5G61850 | AT1G14520 | Activation |
| AT5G61850 | AT1G14530 | Activation |
| AT5G61850 | AT1G14550 | Activation |
| AT5G61850 | AT1G14560 | Activation |
| AT5G61850 | AT1G14570 | Activation |
| AT5G61850 | AT1G14620 | Activation |
| AT5G61850 | AT1G14630 | Activation |
| AT5G61850 | AT1G14740 | Activation |
| AT5G61850 | AT1G14750 | Activation |
| AT5G61850 | AT1G14920 | Activation |
| AT5G61850 | AT1G14930 | Activation |
| AT5G61850 | AT1G15020 | Activation |
| AT5G61850 | AT1G15030 | Activation |
| AT5G61850 | AT1G15550 | Activation |
| AT5G61850 | AT1G15570 | Activation |
| AT5G61850 | AT1G15670 | Activation |
| AT5G61850 | AT1G16080 | Activation |
| AT5G61850 | AT1G17110 | Activation |
| AT5G61850 | AT1G17120 | Activation |
| AT5G61850 | AT1G17140 | Activation |
| AT5G61850 | AT1G17145 | Activation |
| AT5G61850 | AT1G17147 | Activation |

|           |           |            |
|-----------|-----------|------------|
| AT5G61850 | AT1G17150 | Activation |
| AT5G61850 | AT1G17370 | Activation |
| AT5G61850 | AT1G17380 | Activation |
| AT5G61850 | AT1G17390 | Activation |
| AT5G61850 | AT1G17545 | Activation |
| AT5G61850 | AT1G17550 | Activation |
| AT5G61850 | AT1G17690 | Activation |
| AT5G61850 | AT1G17700 | Activation |
| AT5G61850 | AT1G17744 | Activation |
| AT5G61850 | AT1G17745 | Activation |
| AT5G61850 | AT1G17750 | Activation |
| AT5G61850 | AT1G17870 | Activation |
| AT5G61850 | AT1G17880 | Activation |
| AT5G61850 | AT1G17890 | Activation |
| AT5G61850 | AT1G17900 | Activation |
| AT5G61850 | AT1G18200 | Activation |
| AT5G61850 | AT1G18210 | Activation |
| AT5G61850 | AT1G18220 | Activation |
| AT5G61850 | AT1G18390 | Activation |
| AT5G61850 | AT1G18400 | Activation |
| AT5G61850 | AT1G18490 | Activation |
| AT5G61850 | AT1G18500 | Activation |
| AT5G61850 | AT1G18560 | Activation |
| AT5G61850 | AT1G18570 | Activation |
| AT5G61850 | AT1G18590 | Activation |
| AT5G61850 | AT1G18600 | Activation |
| AT5G61850 | AT1G19050 | Activation |
| AT5G61850 | AT1G19060 | Activation |
| AT5G61850 | AT1G19660 | Activation |
| AT5G61850 | AT1G19670 | Activation |
| AT5G61850 | AT1G19800 | Activation |
| AT5G61850 | AT1G19830 | Activation |
| AT5G61850 | AT1G19835 | Activation |
| AT5G61850 | AT1G19840 | Activation |
| AT5G61850 | AT1G19870 | Activation |
| AT5G61850 | AT1G19880 | Activation |
| AT5G61850 | AT1G20290 | Activation |
| AT5G61850 | AT1G20300 | Activation |
| AT5G61850 | AT1G20430 | Activation |
| AT5G61850 | AT1G20440 | Activation |
| AT5G61850 | AT1G20480 | Activation |
| AT5G61850 | AT1G20490 | Activation |
| AT5G61850 | AT1G20500 | Activation |
| AT5G61850 | AT1G20510 | Activation |
| AT5G61850 | AT1G20515 | Activation |
| AT5G61850 | AT1G20620 | Activation |
| AT5G61850 | AT1G20630 | Activation |
| AT5G61850 | AT1G21000 | Activation |
| AT5G61850 | AT1G21010 | Activation |
| AT5G61850 | AT1G21120 | Activation |
| AT5G61850 | AT1G21130 | Activation |
| AT5G61850 | AT1G21140 | Activation |

|           |           |            |
|-----------|-----------|------------|
| AT5G61850 | AT1G21326 | Activation |
| AT5G61850 | AT1G21327 | Activation |
| AT5G61850 | AT1G21390 | Activation |
| AT5G61850 | AT1G21395 | Activation |
| AT5G61850 | AT1G21450 | Activation |
| AT5G61850 | AT1G21460 | Activation |
| AT5G61850 | AT1G21520 | Activation |
| AT5G61850 | AT1G21590 | Activation |
| AT5G61850 | AT1G21600 | Activation |
| AT5G61850 | AT1G21610 | Activation |
| AT5G61850 | AT1G22380 | Activation |
| AT5G61850 | AT1G22400 | Activation |
| AT5G61850 | AT1G22403 | Activation |
| AT5G61850 | AT1G22410 | Activation |
| AT5G61850 | AT1G22560 | Activation |
| AT5G61850 | AT1G22570 | Activation |
| AT5G61850 | AT1G22680 | Activation |
| AT5G61850 | AT1G22690 | Activation |
| AT5G61850 | AT1G22700 | Activation |
| AT5G61850 | AT1G22710 | Activation |
| AT5G61850 | AT1G22730 | Activation |
| AT5G61850 | AT1G22740 | Activation |
| AT5G61850 | AT1G22760 | Activation |
| AT5G61850 | AT1G22767 | Activation |
| AT5G61850 | AT1G22810 | Activation |
| AT5G61850 | AT1G22830 | Activation |
| AT5G61850 | AT1G23070 | Activation |
| AT5G61850 | AT1G23074 | Activation |
| AT5G61850 | AT1G23080 | Activation |
| AT5G61850 | AT1G23100 | Activation |
| AT5G61850 | AT1G23390 | Activation |
| AT5G61850 | AT1G23400 | Activation |
| AT5G61850 | AT1G23700 | Activation |
| AT5G61850 | AT1G23710 | Activation |
| AT5G61850 | AT1G23860 | Activation |
| AT5G61850 | AT1G23870 | Activation |
| AT5G61850 | AT1G24140 | Activation |
| AT5G61850 | AT1G24145 | Activation |
| AT5G61850 | AT1G24160 | Activation |
| AT5G61850 | AT1G24170 | Activation |
| AT5G61850 | AT1G24260 | Activation |
| AT5G61850 | AT1G24265 | Activation |
| AT5G61850 | AT1G24530 | Activation |
| AT5G61850 | AT1G24600 | Activation |
| AT5G61850 | AT1G24625 | Activation |
| AT5G61850 | AT1G24640 | Activation |
| AT5G61850 | AT1G25240 | Activation |
| AT5G61850 | AT1G25250 | Activation |
| AT5G61850 | AT1G25270 | Activation |
| AT5G61850 | AT1G25275 | Activation |
| AT5G61850 | AT1G25280 | Activation |
| AT5G61850 | AT1G25390 | Activation |

|           |           |            |
|-----------|-----------|------------|
| AT5G61850 | AT1G25400 | Activation |
| AT5G61850 | AT1G25440 | Activation |
| AT5G61850 | AT1G25450 | Activation |
| AT5G61850 | AT1G25540 | Activation |
| AT5G61850 | AT1G25550 | Activation |
| AT5G61850 | AT1G25560 | Activation |
| AT5G61850 | AT1G25570 | Activation |
| AT5G61850 | AT1G25580 | Activation |
| AT5G61850 | AT1G26550 | Activation |
| AT5G61850 | AT1G26558 | Activation |
| AT5G61850 | AT1G26940 | Activation |
| AT5G61850 | AT1G27110 | Activation |
| AT5G61850 | AT1G27120 | Activation |
| AT5G61850 | AT1G27210 | Activation |
| AT5G61850 | AT1G27213 | Activation |
| AT5G61850 | AT1G27220 | Activation |
| AT5G61850 | AT1G27320 | Activation |
| AT5G61850 | AT1G27330 | Activation |
| AT5G61850 | AT1G27440 | Activation |
| AT5G61850 | AT1G27450 | Activation |
| AT5G61850 | AT1G27470 | Activation |
| AT5G61850 | AT1G27480 | Activation |
| AT5G61850 | AT1G27730 | Activation |
| AT5G61850 | AT1G27740 | Activation |
| AT5G61850 | AT1G27750 | Activation |
| AT5G61850 | AT1G27752 | Activation |
| AT5G61850 | AT1G27840 | Activation |
| AT5G61850 | AT1G27850 | Activation |
| AT5G61850 | AT1G27920 | Activation |
| AT5G61850 | AT1G27921 | Activation |
| AT5G61850 | AT1G27930 | Activation |
| AT5G61850 | AT1G28310 | Activation |
| AT5G61850 | AT1G28430 | Activation |
| AT5G61850 | AT1G28560 | Activation |
| AT5G61850 | AT1G28570 | Activation |
| AT5G61850 | AT1G28600 | Activation |
| AT5G61850 | AT1G28610 | Activation |
| AT5G61850 | AT1G28630 | Activation |
| AT5G61850 | AT1G29060 | Activation |
| AT5G61850 | AT1G29400 | Activation |
| AT5G61850 | AT1G29410 | Activation |
| AT5G61850 | AT1G29430 | Activation |
| AT5G61850 | AT1G29440 | Activation |
| AT5G61850 | AT1G29450 | Activation |
| AT5G61850 | AT1G29460 | Activation |
| AT5G61850 | AT1G29500 | Activation |
| AT5G61850 | AT1G29510 | Activation |
| AT5G61850 | AT1G29630 | Activation |
| AT5G61850 | AT1G29640 | Activation |
| AT5G61850 | AT1G29720 | Activation |
| AT5G61850 | AT1G29910 | Activation |
| AT5G61850 | AT1G29920 | Activation |



|           |           |            |
|-----------|-----------|------------|
| AT5G61850 | AT1G29930 | Activation |
| AT5G61850 | AT1G30016 | Activation |
| AT5G61850 | AT1G30040 | Activation |
| AT5G61850 | AT1G30190 | Activation |
| AT5G61850 | AT1G30320 | Activation |
| AT5G61850 | AT1G30350 | Activation |
| AT5G61850 | AT1G30360 | Activation |
| AT5G61850 | AT1G30475 | Activation |
| AT5G61850 | AT1G30480 | Activation |
| AT5G61850 | AT1G31130 | Activation |
| AT5G61850 | AT1G31140 | Activation |
| AT5G61850 | AT1G31340 | Activation |
| AT5G61850 | AT1G31350 | Activation |
| AT5G61850 | AT1G32170 | Activation |
| AT5G61850 | AT1G32530 | Activation |
| AT5G61850 | AT1G32540 | Activation |
| AT5G61850 | AT1G32550 | Activation |
| AT5G61850 | AT1G32780 | Activation |
| AT5G61850 | AT1G32790 | Activation |
| AT5G61850 | AT1G32900 | Activation |
| AT5G61850 | AT1G32910 | Activation |
| AT5G61850 | AT1G32920 | Activation |
| AT5G61850 | AT1G33060 | Activation |
| AT5G61850 | AT1G33102 | Activation |
| AT5G61850 | AT1G33110 | Activation |
| AT5G61850 | AT1G33360 | Activation |
| AT5G61850 | AT1G33370 | Activation |
| AT5G61850 | AT1G33415 | Activation |
| AT5G61850 | AT1G33440 | Activation |
| AT5G61850 | AT1G33590 | Activation |
| AT5G61850 | AT1G33600 | Activation |
| AT5G61850 | AT1G33790 | Activation |
| AT5G61850 | AT1G33800 | Activation |
| AT5G61850 | AT1G33810 | Activation |
| AT5G61850 | AT1G33970 | Activation |
| AT5G61850 | AT1G33980 | Activation |
| AT5G61850 | AT1G34120 | Activation |
| AT5G61850 | AT1G34210 | Activation |
| AT5G61850 | AT1G34220 | Activation |
| AT5G61850 | AT1G34230 | Activation |
| AT5G61850 | AT1G35510 | Activation |
| AT5G61850 | AT1G35515 | Activation |
| AT5G61850 | AT1G35610 | Activation |
| AT5G61850 | AT1G35612 | Activation |
| AT5G61850 | AT1G35663 | Activation |
| AT5G61850 | AT1G35670 | Activation |
| AT5G61850 | AT1G35720 | Activation |
| AT5G61850 | AT1G35730 | Activation |
| AT5G61850 | AT1G35735 | Activation |
| AT5G61850 | AT1G36936 | Activation |
| AT5G61850 | AT1G36940 | Activation |
| AT5G61850 | AT1G37130 | Activation |

|           |           |            |
|-----------|-----------|------------|
| AT5G61850 | AT1G37140 | Activation |
| AT5G61850 | AT1G37150 | Activation |
| AT5G61850 | AT1G44170 | Activation |
| AT5G61850 | AT1G44835 | Activation |
| AT5G61850 | AT1G45120 | Activation |
| AT5G61850 | AT1G45130 | Activation |
| AT5G61850 | AT1G45201 | Activation |
| AT5G61850 | AT1G45230 | Activation |
| AT5G61850 | AT1G45249 | Activation |
| AT5G61850 | AT1G47128 | Activation |
| AT5G61850 | AT1G48090 | Activation |
| AT5G61850 | AT1G48095 | Activation |
| AT5G61850 | AT1G48267 | Activation |
| AT5G61850 | AT1G48270 | Activation |
| AT5G61850 | AT1G48410 | Activation |
| AT5G61850 | AT1G48420 | Activation |
| AT5G61850 | AT1G48470 | Activation |
| AT5G61850 | AT1G48480 | Activation |
| AT5G61850 | AT1G48870 | Activation |
| AT5G61850 | AT1G48880 | Activation |
| AT5G61850 | AT1G48970 | Activation |
| AT5G61850 | AT1G48980 | Activation |
| AT5G61850 | AT1G48990 | Activation |
| AT5G61850 | AT1G49000 | Activation |
| AT5G61850 | AT1G49005 | Activation |
| AT5G61850 | AT1G49010 | Activation |
| AT5G61850 | AT1G49310 | Activation |
| AT5G61850 | AT1G49410 | Activation |
| AT5G61850 | AT1G49420 | Activation |
| AT5G61850 | AT1G49430 | Activation |
| AT5G61850 | AT1G49440 | Activation |
| AT5G61850 | AT1G49450 | Activation |
| AT5G61850 | AT1G49590 | Activation |
| AT5G61850 | AT1G49600 | Activation |
| AT5G61850 | AT1G49750 | Activation |
| AT5G61850 | AT1G49760 | Activation |
| AT5G61850 | AT1G50140 | Activation |
| AT5G61850 | AT1G50160 | Activation |
| AT5G61850 | AT1G50170 | Activation |
| AT5G61850 | AT1G50410 | Activation |
| AT5G61850 | AT1G50420 | Activation |
| AT5G61850 | AT1G50640 | Activation |
| AT5G61850 | AT1G51160 | Activation |
| AT5G61850 | AT1G51170 | Activation |
| AT5G61850 | AT1G52560 | Activation |
| AT5G61850 | AT1G52565 | Activation |
| AT5G61850 | AT1G52790 | Activation |
| AT5G61850 | AT1G52800 | Activation |
| AT5G61850 | AT1G52890 | Activation |
| AT5G61850 | AT1G52900 | Activation |
| AT5G61850 | AT1G53165 | Activation |
| AT5G61850 | AT1G53170 | Activation |

|           |           |            |
|-----------|-----------|------------|
| AT5G61850 | AT1G53430 | Activation |
| AT5G61850 | AT1G53830 | Activation |
| AT5G61850 | AT1G54110 | Activation |
| AT5G61850 | AT1G54115 | Activation |
| AT5G61850 | AT1G54120 | Activation |
| AT5G61850 | AT1G54130 | Activation |
| AT5G61850 | AT1G54170 | Activation |
| AT5G61850 | AT1G54180 | Activation |
| AT5G61850 | AT1G54215 | Activation |
| AT5G61850 | AT1G54217 | Activation |
| AT5G61850 | AT1G54220 | Activation |
| AT5G61850 | AT1G55205 | Activation |
| AT5G61850 | AT1G55210 | Activation |
| AT5G61850 | AT1G55330 | Activation |
| AT5G61850 | AT1G55340 | Activation |
| AT5G61850 | AT1G55350 | Activation |
| AT5G61850 | AT1G55650 | Activation |
| AT5G61850 | AT1G55660 | Activation |
| AT5G61850 | AT1G55690 | Activation |
| AT5G61850 | AT1G55700 | Activation |
| AT5G61850 | AT1G55750 | Activation |
| AT5G61850 | AT1G55760 | Activation |
| AT5G61850 | AT1G55770 | Activation |
| AT5G61850 | AT1G55960 | Activation |
| AT5G61850 | AT1G55970 | Activation |
| AT5G61850 | AT1G56010 | Activation |
| AT5G61850 | AT1G56020 | Activation |
| AT5G61850 | AT1G56030 | Activation |
| AT5G61850 | AT1G56240 | Activation |
| AT5G61850 | AT1G56242 | Activation |
| AT5G61850 | AT1G56250 | Activation |
| AT5G61850 | AT1G56260 | Activation |
| AT5G61850 | AT1G56550 | Activation |
| AT5G61850 | AT1G56553 | Activation |
| AT5G61850 | AT1G56630 | Activation |
| AT5G61850 | AT1G56650 | Activation |
| AT5G61850 | AT1G58180 | Activation |
| AT5G61850 | AT1G58190 | Activation |
| AT5G61850 | AT1G58200 | Activation |
| AT5G61850 | AT1G58210 | Activation |
| AT5G61850 | AT1G58350 | Activation |
| AT5G61850 | AT1G59660 | Activation |
| AT5G61850 | AT1G59670 | Activation |
| AT5G61850 | AT1G59710 | Activation |
| AT5G61850 | AT1G59720 | Activation |
| AT5G61850 | AT1G59722 | Activation |
| AT5G61850 | AT1G59780 | Activation |
| AT5G61850 | AT1G59790 | Activation |
| AT5G61850 | AT1G59930 | Activation |
| AT5G61850 | AT1G59940 | Activation |
| AT5G61850 | AT1G59950 | Activation |
| AT5G61850 | AT1G59960 | Activation |

|           |           |            |
|-----------|-----------|------------|
| AT5G61850 | AT1G60010 | Activation |
| AT5G61850 | AT1G60020 | Activation |
| AT5G61850 | AT1G61255 | Activation |
| AT5G61850 | AT1G61260 | Activation |
| AT5G61850 | AT1G61795 | Activation |
| AT5G61850 | AT1G61800 | Activation |
| AT5G61850 | AT1G62301 | Activation |
| AT5G61850 | AT1G62305 | Activation |
| AT5G61850 | AT1G63290 | Activation |
| AT5G61850 | AT1G63570 | Activation |
| AT5G61850 | AT1G63580 | Activation |
| AT5G61850 | AT1G63700 | Activation |
| AT5G61850 | AT1G63710 | Activation |
| AT5G61850 | AT1G63800 | Activation |
| AT5G61850 | AT1G63810 | Activation |
| AT5G61850 | AT1G63835 | Activation |
| AT5G61850 | AT1G63840 | Activation |
| AT5G61850 | AT1G63880 | Activation |
| AT5G61850 | AT1G63900 | Activation |
| AT5G61850 | AT1G64050 | Activation |
| AT5G61850 | AT1G64060 | Activation |
| AT5G61850 | AT1G64170 | Activation |
| AT5G61850 | AT1G64180 | Activation |
| AT5G61850 | AT1G64420 | Activation |
| AT5G61850 | AT1G64430 | Activation |
| AT5G61850 | AT1G64440 | Activation |
| AT5G61850 | AT1G64800 | Activation |
| AT5G61850 | AT1G64810 | Activation |
| AT5G61850 | AT1G64820 | Activation |
| AT5G61850 | AT1G65040 | Activation |
| AT5G61850 | AT1G65050 | Activation |
| AT5G61850 | AT1G65790 | Activation |
| AT5G61850 | AT1G65800 | Activation |
| AT5G61850 | AT1G65810 | Activation |
| AT5G61850 | AT1G66190 | Activation |
| AT5G61850 | AT1G66200 | Activation |
| AT5G61850 | AT1G66245 | Activation |
| AT5G61850 | AT1G66250 | Activation |
| AT5G61850 | AT1G66480 | Activation |
| AT5G61850 | AT1G66490 | Activation |
| AT5G61850 | AT1G66720 | Activation |
| AT5G61850 | AT1G66725 | Activation |
| AT5G61850 | AT1G66730 | Activation |
| AT5G61850 | AT1G66920 | Activation |
| AT5G61850 | AT1G66930 | Activation |
| AT5G61850 | AT1G66980 | Activation |
| AT5G61850 | AT1G67000 | Activation |
| AT5G61850 | AT1G67265 | Activation |
| AT5G61850 | AT1G67350 | Activation |
| AT5G61850 | AT1G67680 | Activation |
| AT5G61850 | AT1G67690 | Activation |
| AT5G61850 | AT1G67730 | Activation |

|           |           |            |
|-----------|-----------|------------|
| AT5G61850 | AT1G67740 | Activation |
| AT5G61850 | AT1G67750 | Activation |
| AT5G61850 | AT1G67760 | Activation |
| AT5G61850 | AT1G67770 | Activation |
| AT5G61850 | AT1G67775 | Activation |
| AT5G61850 | AT1G67850 | Activation |
| AT5G61850 | AT1G67855 | Activation |
| AT5G61850 | AT1G67856 | Activation |
| AT5G61850 | AT1G67900 | Activation |
| AT5G61850 | AT1G67910 | Activation |
| AT5G61850 | AT1G67920 | Activation |
| AT5G61850 | AT1G68360 | Activation |
| AT5G61850 | AT1G68380 | Activation |
| AT5G61850 | AT1G68500 | Activation |
| AT5G61850 | AT1G68510 | Activation |
| AT5G61850 | AT1G68520 | Activation |
| AT5G61850 | AT1G68580 | Activation |
| AT5G61850 | AT1G68585 | Activation |
| AT5G61850 | AT1G68825 | Activation |
| AT5G61850 | AT1G68830 | Activation |
| AT5G61850 | AT1G68875 | Activation |
| AT5G61850 | AT1G68890 | Activation |
| AT5G61850 | AT1G69030 | Activation |
| AT5G61850 | AT1G69130 | Activation |
| AT5G61850 | AT1G69150 | Activation |
| AT5G61850 | AT1G69160 | Activation |
| AT5G61850 | AT1G69330 | Activation |
| AT5G61850 | AT1G69340 | Activation |
| AT5G61850 | AT1G69420 | Activation |
| AT5G61850 | AT1G69680 | Activation |
| AT5G61850 | AT1G69760 | Activation |
| AT5G61850 | AT1G69770 | Activation |
| AT5G61850 | AT1G69780 | Activation |
| AT5G61850 | AT1G69800 | Activation |
| AT5G61850 | AT1G69810 | Activation |
| AT5G61850 | AT1G69850 | Activation |
| AT5G61850 | AT1G69870 | Activation |
| AT5G61850 | AT1G70200 | Activation |
| AT5G61850 | AT1G70290 | Activation |
| AT5G61850 | AT1G70300 | Activation |
| AT5G61850 | AT1G70370 | Activation |
| AT5G61850 | AT1G70420 | Activation |
| AT5G61850 | AT1G70520 | Activation |
| AT5G61850 | AT1G70530 | Activation |
| AT5G61850 | AT1G70550 | Activation |
| AT5G61850 | AT1G70581 | Activation |
| AT5G61850 | AT1G70590 | Activation |
| AT5G61850 | AT1G70700 | Activation |
| AT5G61850 | AT1G70710 | Activation |
| AT5G61850 | AT1G70890 | Activation |
| AT5G61850 | AT1G70895 | Activation |
| AT5G61850 | AT1G70900 | Activation |

|           |           |            |
|-----------|-----------|------------|
| AT5G61850 | AT1G70940 | Activation |
| AT5G61850 | AT1G70944 | Activation |
| AT5G61850 | AT1G71030 | Activation |
| AT5G61850 | AT1G71040 | Activation |
| AT5G61850 | AT1G71370 | Activation |
| AT5G61850 | AT1G71380 | Activation |
| AT5G61850 | AT1G71500 | Activation |
| AT5G61850 | AT1G71520 | Activation |
| AT5G61850 | AT1G71720 | Activation |
| AT5G61850 | AT1G72000 | Activation |
| AT5G61850 | AT1G72010 | Activation |
| AT5G61850 | AT1G72060 | Activation |
| AT5G61850 | AT1G72070 | Activation |
| AT5G61850 | AT1G72080 | Activation |
| AT5G61850 | AT1G72150 | Activation |
| AT5G61850 | AT1G72160 | Activation |
| AT5G61850 | AT1G72190 | Activation |
| AT5G61850 | AT1G72200 | Activation |
| AT5G61850 | AT1G72300 | Activation |
| AT5G61850 | AT1G72500 | Activation |
| AT5G61850 | AT1G72510 | Activation |
| AT5G61850 | AT1G72620 | Activation |
| AT5G61850 | AT1G72630 | Activation |
| AT5G61850 | AT1G72830 | Activation |
| AT5G61850 | AT1G72840 | Activation |
| AT5G61850 | AT1G73020 | Activation |
| AT5G61850 | AT1G73030 | Activation |
| AT5G61850 | AT1G73230 | Activation |
| AT5G61850 | AT1G73240 | Activation |
| AT5G61850 | AT1G73390 | Activation |
| AT5G61850 | AT1G73400 | Activation |
| AT5G61850 | AT1G73805 | Activation |
| AT5G61850 | AT1G73810 | Activation |
| AT5G61850 | AT1G73910 | Activation |
| AT5G61850 | AT1G73920 | Activation |
| AT5G61850 | AT1G74088 | Activation |
| AT5G61850 | AT1G74280 | Activation |
| AT5G61850 | AT1G74290 | Activation |
| AT5G61850 | AT1G74300 | Activation |
| AT5G61850 | AT1G74340 | Activation |
| AT5G61850 | AT1G74360 | Activation |
| AT5G61850 | AT1G74460 | Activation |
| AT5G61850 | AT1G74470 | Activation |
| AT5G61850 | AT1G74950 | Activation |
| AT5G61850 | AT1G74960 | Activation |
| AT5G61850 | AT1G75090 | Activation |
| AT5G61850 | AT1G75100 | Activation |
| AT5G61850 | AT1G75170 | Activation |
| AT5G61850 | AT1G75180 | Activation |
| AT5G61850 | AT1G75190 | Activation |
| AT5G61850 | AT1G75200 | Activation |
| AT5G61850 | AT1G75440 | Activation |

|           |           |            |
|-----------|-----------|------------|
| AT5G61850 | AT1G75450 | Activation |
| AT5G61850 | AT1G75680 | Activation |
| AT5G61850 | AT1G75690 | Activation |
| AT5G61850 | AT1G75710 | Activation |
| AT5G61850 | AT1G75717 | Activation |
| AT5G61850 | AT1G75820 | Activation |
| AT5G61850 | AT1G76120 | Activation |
| AT5G61850 | AT1G76130 | Activation |
| AT5G61850 | AT1G76180 | Activation |
| AT5G61850 | AT1G76185 | Activation |
| AT5G61850 | AT1G76310 | Activation |
| AT5G61850 | AT1G76320 | Activation |
| AT5G61850 | AT1G76510 | Activation |
| AT5G61850 | AT1G76520 | Activation |
| AT5G61850 | AT1G76580 | Activation |
| AT5G61850 | AT1G76590 | Activation |
| AT5G61850 | AT1G76880 | Activation |
| AT5G61850 | AT1G76952 | Activation |
| AT5G61850 | AT1G76954 | Activation |
| AT5G61850 | AT1G76980 | Activation |
| AT5G61850 | AT1G76990 | Activation |
| AT5G61850 | AT1G76994 | Activation |
| AT5G61850 | AT1G77000 | Activation |
| AT5G61850 | AT1G77060 | Activation |
| AT5G61850 | AT1G77080 | Activation |
| AT5G61850 | AT1G77620 | Activation |
| AT5G61850 | AT1G77630 | Activation |
| AT5G61850 | AT1G77640 | Activation |
| AT5G61850 | AT1G77650 | Activation |
| AT5G61850 | AT1G77730 | Activation |
| AT5G61850 | AT1G77740 | Activation |
| AT5G61850 | AT1G77780 | Activation |
| AT5G61850 | AT1G77790 | Activation |
| AT5G61850 | AT1G77800 | Activation |
| AT5G61850 | AT1G77992 | Activation |
| AT5G61850 | AT1G78010 | Activation |
| AT5G61850 | AT1G78020 | Activation |
| AT5G61850 | AT1G78100 | Activation |
| AT5G61850 | AT1G78120 | Activation |
| AT5G61850 | AT1G78130 | Activation |
| AT5G61850 | AT1G78240 | Activation |
| AT5G61850 | AT1G78390 | Activation |
| AT5G61850 | AT1G78400 | Activation |
| AT5G61850 | AT1G78610 | Activation |
| AT5G61850 | AT1G78620 | Activation |
| AT5G61850 | AT1G78630 | Activation |
| AT5G61850 | AT1G78820 | Activation |
| AT5G61850 | AT1G78830 | Activation |
| AT5G61850 | AT1G78880 | Activation |
| AT5G61850 | AT1G78890 | Activation |
| AT5G61850 | AT1G79120 | Activation |
| AT5G61850 | AT1G79410 | Activation |

|           |           |            |
|-----------|-----------|------------|
| AT5G61850 | AT1G79420 | Activation |
| AT5G61850 | AT1G79620 | Activation |
| AT5G61850 | AT1G79630 | Activation |
| AT5G61850 | AT1G79640 | Activation |
| AT5G61850 | AT1G80010 | Activation |
| AT5G61850 | AT1G80020 | Activation |
| AT5G61850 | AT1G80080 | Activation |
| AT5G61850 | AT1G80090 | Activation |
| AT5G61850 | AT1G80100 | Activation |
| AT5G61850 | AT1G80280 | Activation |
| AT5G61850 | AT1G80290 | Activation |
| AT5G61850 | AT1G80340 | Activation |
| AT5G61850 | AT1G80350 | Activation |
| AT5G61850 | AT1G80370 | Activation |
| AT5G61850 | AT1G80380 | Activation |
| AT5G61850 | AT1G80490 | Activation |
| AT5G61850 | AT1G80500 | Activation |
| AT5G61850 | AT1G80820 | Activation |
| AT5G61850 | AT1G80830 | Activation |
| AT5G61850 | AT1G80840 | Activation |
| AT5G61850 | AT2G01260 | Activation |
| AT5G61850 | AT2G01270 | Activation |
| AT5G61850 | AT2G01330 | Activation |
| AT5G61850 | AT2G01340 | Activation |
| AT5G61850 | AT2G01410 | Activation |
| AT5G61850 | AT2G01420 | Activation |
| AT5G61850 | AT2G01850 | Activation |
| AT5G61850 | AT2G01860 | Activation |
| AT5G61850 | AT2G01905 | Activation |
| AT5G61850 | AT2G01910 | Activation |
| AT5G61850 | AT2G02020 | Activation |
| AT5G61850 | AT2G02050 | Activation |
| AT5G61850 | AT2G02860 | Activation |
| AT5G61850 | AT2G02930 | Activation |
| AT5G61850 | AT2G02950 | Activation |
| AT5G61850 | AT2G03240 | Activation |
| AT5G61850 | AT2G03340 | Activation |
| AT5G61850 | AT2G03350 | Activation |
| AT5G61850 | AT2G03430 | Activation |
| AT5G61850 | AT2G03440 | Activation |
| AT5G61850 | AT2G03445 | Activation |
| AT5G61850 | AT2G03540 | Activation |
| AT5G61850 | AT2G03550 | Activation |
| AT5G61850 | AT2G03680 | Activation |
| AT5G61850 | AT2G03690 | Activation |
| AT5G61850 | AT2G03700 | Activation |
| AT5G61850 | AT2G03710 | Activation |
| AT5G61850 | AT2G03720 | Activation |
| AT5G61850 | AT2G03740 | Activation |
| AT5G61850 | AT2G03750 | Activation |
| AT5G61850 | AT2G03980 | Activation |
| AT5G61850 | AT2G04170 | Activation |



|           |           |            |
|-----------|-----------|------------|
| AT5G61850 | AT2G04180 | Activation |
| AT5G61850 | AT2G06050 | Activation |
| AT5G61850 | AT2G06060 | Activation |
| AT5G61850 | AT2G11240 | Activation |
| AT5G61850 | AT2G11270 | Activation |
| AT5G61850 | AT2G12461 | Activation |
| AT5G61850 | AT2G12462 | Activation |
| AT5G61850 | AT2G12465 | Activation |
| AT5G61850 | AT2G14890 | Activation |
| AT5G61850 | AT2G14900 | Activation |
| AT5G61850 | AT2G15070 | Activation |
| AT5G61850 | AT2G15080 | Activation |
| AT5G61850 | AT2G15090 | Activation |
| AT5G61850 | AT2G15370 | Activation |
| AT5G61850 | AT2G15380 | Activation |
| AT5G61850 | AT2G15560 | Activation |
| AT5G61850 | AT2G15570 | Activation |
| AT5G61850 | AT2G15750 | Activation |
| AT5G61850 | AT2G15760 | Activation |
| AT5G61850 | AT2G16850 | Activation |
| AT5G61850 | AT2G16860 | Activation |
| AT5G61850 | AT2G17055 | Activation |
| AT5G61850 | AT2G17060 | Activation |
| AT5G61850 | AT2G17220 | Activation |
| AT5G61850 | AT2G17660 | Activation |
| AT5G61850 | AT2G17670 | Activation |
| AT5G61850 | AT2G17730 | Activation |
| AT5G61850 | AT2G17740 | Activation |
| AT5G61850 | AT2G17750 | Activation |
| AT5G61850 | AT2G17760 | Activation |
| AT5G61850 | AT2G17770 | Activation |
| AT5G61850 | AT2G17975 | Activation |
| AT5G61850 | AT2G17980 | Activation |
| AT5G61850 | AT2G17990 | Activation |
| AT5G61850 | AT2G18162 | Activation |
| AT5G61850 | AT2G18200 | Activation |
| AT5G61850 | AT2G18210 | Activation |
| AT5G61850 | AT2G18260 | Activation |
| AT5G61850 | AT2G18280 | Activation |
| AT5G61850 | AT2G18400 | Activation |
| AT5G61850 | AT2G18410 | Activation |
| AT5G61850 | AT2G18540 | Activation |
| AT5G61850 | AT2G18550 | Activation |
| AT5G61850 | AT2G18640 | Activation |
| AT5G61850 | AT2G18650 | Activation |
| AT5G61850 | AT2G18880 | Activation |
| AT5G61850 | AT2G18890 | Activation |
| AT5G61850 | AT2G19120 | Activation |
| AT5G61850 | AT2G19130 | Activation |
| AT5G61850 | AT2G19620 | Activation |
| AT5G61850 | AT2G19630 | Activation |
| AT5G61850 | AT2G19780 | Activation |

|           |           |            |
|-----------|-----------|------------|
| AT5G61850 | AT2G19790 | Activation |
| AT5G61850 | AT2G19806 | Activation |
| AT5G61850 | AT2G19810 | Activation |
| AT5G61850 | AT2G19820 | Activation |
| AT5G61850 | AT2G19840 | Activation |
| AT5G61850 | AT2G19850 | Activation |
| AT5G61850 | AT2G20050 | Activation |
| AT5G61850 | AT2G20060 | Activation |
| AT5G61850 | AT2G20562 | Activation |
| AT5G61850 | AT2G20570 | Activation |
| AT5G61850 | AT2G20580 | Activation |
| AT5G61850 | AT2G20825 | Activation |
| AT5G61850 | AT2G20830 | Activation |
| AT5G61850 | AT2G21120 | Activation |
| AT5G61850 | AT2G21130 | Activation |
| AT5G61850 | AT2G21300 | Activation |
| AT5G61850 | AT2G21310 | Activation |
| AT5G61850 | AT2G21370 | Activation |
| AT5G61850 | AT2G21380 | Activation |
| AT5G61850 | AT2G22010 | Activation |
| AT5G61850 | AT2G22030 | Activation |
| AT5G61850 | AT2G22080 | Activation |
| AT5G61850 | AT2G22088 | Activation |
| AT5G61850 | AT2G22090 | Activation |
| AT5G61850 | AT2G22190 | Activation |
| AT5G61850 | AT2G22280 | Activation |
| AT5G61850 | AT2G22290 | Activation |
| AT5G61850 | AT2G22330 | Activation |
| AT5G61850 | AT2G22340 | Activation |
| AT5G61850 | AT2G22425 | Activation |
| AT5G61850 | AT2G22426 | Activation |
| AT5G61850 | AT2G22500 | Activation |
| AT5G61850 | AT2G22590 | Activation |
| AT5G61850 | AT2G22600 | Activation |
| AT5G61850 | AT2G22890 | Activation |
| AT5G61850 | AT2G22900 | Activation |
| AT5G61850 | AT2G22905 | Activation |
| AT5G61850 | AT2G22980 | Activation |
| AT5G61850 | AT2G22990 | Activation |
| AT5G61850 | AT2G23067 | Activation |
| AT5G61850 | AT2G23120 | Activation |
| AT5G61850 | AT2G23130 | Activation |
| AT5G61850 | AT2G23180 | Activation |
| AT5G61850 | AT2G23190 | Activation |
| AT5G61850 | AT2G23200 | Activation |
| AT5G61850 | AT2G23350 | Activation |
| AT5G61850 | AT2G23360 | Activation |
| AT5G61850 | AT2G23420 | Activation |
| AT5G61850 | AT2G23430 | Activation |
| AT5G61850 | AT2G23450 | Activation |
| AT5G61850 | AT2G23460 | Activation |
| AT5G61850 | AT2G24030 | Activation |

|           |           |            |
|-----------|-----------|------------|
| AT5G61850 | AT2G24040 | Activation |
| AT5G61850 | AT2G24170 | Activation |
| AT5G61850 | AT2G24240 | Activation |
| AT5G61850 | AT2G24285 | Activation |
| AT5G61850 | AT2G24290 | Activation |
| AT5G61850 | AT2G24300 | Activation |
| AT5G61850 | AT2G24880 | Activation |
| AT5G61850 | AT2G24890 | Activation |
| AT5G61850 | AT2G25052 | Activation |
| AT5G61850 | AT2G25060 | Activation |
| AT5G61850 | AT2G25070 | Activation |
| AT5G61850 | AT2G25460 | Activation |
| AT5G61850 | AT2G25470 | Activation |
| AT5G61850 | AT2G25490 | Activation |
| AT5G61850 | AT2G25500 | Activation |
| AT5G61850 | AT2G25735 | Activation |
| AT5G61850 | AT2G25737 | Activation |
| AT5G61850 | AT2G25910 | Activation |
| AT5G61850 | AT2G25920 | Activation |
| AT5G61850 | AT2G25930 | Activation |
| AT5G61850 | AT2G26330 | Activation |
| AT5G61850 | AT2G26340 | Activation |
| AT5G61850 | AT2G26510 | Activation |
| AT5G61850 | AT2G26511 | Activation |
| AT5G61850 | AT2G26520 | Activation |
| AT5G61850 | AT2G26530 | Activation |
| AT5G61850 | AT2G26540 | Activation |
| AT5G61850 | AT2G27350 | Activation |
| AT5G61850 | AT2G27360 | Activation |
| AT5G61850 | AT2G27510 | Activation |
| AT5G61850 | AT2G27520 | Activation |
| AT5G61850 | AT2G27650 | Activation |
| AT5G61850 | AT2G27660 | Activation |
| AT5G61850 | AT2G27670 | Activation |
| AT5G61850 | AT2G27810 | Activation |
| AT5G61850 | AT2G27820 | Activation |
| AT5G61850 | AT2G27830 | Activation |
| AT5G61850 | AT2G27840 | Activation |
| AT5G61850 | AT2G28200 | Activation |
| AT5G61850 | AT2G28350 | Activation |
| AT5G61850 | AT2G28360 | Activation |
| AT5G61850 | AT2G28520 | Activation |
| AT5G61850 | AT2G28610 | Activation |
| AT5G61850 | AT2G28620 | Activation |
| AT5G61850 | AT2G28640 | Activation |
| AT5G61850 | AT2G28650 | Activation |
| AT5G61850 | AT2G28660 | Activation |
| AT5G61850 | AT2G28671 | Activation |
| AT5G61850 | AT2G28725 | Activation |
| AT5G61850 | AT2G28730 | Activation |
| AT5G61850 | AT2G28740 | Activation |
| AT5G61850 | AT2G28920 | Activation |

|           |           |            |
|-----------|-----------|------------|
| AT5G61850 | AT2G28930 | Activation |
| AT5G61850 | AT2G28940 | Activation |
| AT5G61850 | AT2G28950 | Activation |
| AT5G61850 | AT2G29080 | Activation |
| AT5G61850 | AT2G29090 | Activation |
| AT5G61850 | AT2G29263 | Activation |
| AT5G61850 | AT2G29290 | Activation |
| AT5G61850 | AT2G29330 | Activation |
| AT5G61850 | AT2G29340 | Activation |
| AT5G61850 | AT2G29350 | Activation |
| AT5G61850 | AT2G29650 | Activation |
| AT5G61850 | AT2G29654 | Activation |
| AT5G61850 | AT2G29940 | Activation |
| AT5G61850 | AT2G29950 | Activation |
| AT5G61850 | AT2G29960 | Activation |
| AT5G61850 | AT2G30060 | Activation |
| AT5G61850 | AT2G30070 | Activation |
| AT5G61850 | AT2G30300 | Activation |
| AT5G61850 | AT2G30310 | Activation |
| AT5G61850 | AT2G30424 | Activation |
| AT5G61850 | AT2G30430 | Activation |
| AT5G61850 | AT2G30490 | Activation |
| AT5G61850 | AT2G30500 | Activation |
| AT5G61850 | AT2G30580 | Activation |
| AT5G61850 | AT2G30590 | Activation |
| AT5G61850 | AT2G30990 | Activation |
| AT5G61850 | AT2G31005 | Activation |
| AT5G61850 | AT2G31150 | Activation |
| AT5G61850 | AT2G31160 | Activation |
| AT5G61850 | AT2G31230 | Activation |
| AT5G61850 | AT2G31320 | Activation |
| AT5G61850 | AT2G31335 | Activation |
| AT5G61850 | AT2G31350 | Activation |
| AT5G61850 | AT2G31360 | Activation |
| AT5G61850 | AT2G31390 | Activation |
| AT5G61850 | AT2G31400 | Activation |
| AT5G61850 | AT2G31780 | Activation |
| AT5G61850 | AT2G31790 | Activation |
| AT5G61850 | AT2G32090 | Activation |
| AT5G61850 | AT2G32100 | Activation |
| AT5G61850 | AT2G32510 | Activation |
| AT5G61850 | AT2G32765 | Activation |
| AT5G61850 | AT2G32770 | Activation |
| AT5G61850 | AT2G33170 | Activation |
| AT5G61850 | AT2G33175 | Activation |
| AT5G61850 | AT2G33180 | Activation |
| AT5G61850 | AT2G33190 | Activation |
| AT5G61850 | AT2G33350 | Activation |
| AT5G61850 | AT2G33360 | Activation |
| AT5G61850 | AT2G33430 | Activation |
| AT5G61850 | AT2G33435 | Activation |
| AT5G61850 | AT2G33500 | Activation |

|           |           |            |
|-----------|-----------|------------|
| AT5G61850 | AT2G33509 | Activation |
| AT5G61850 | AT2G33510 | Activation |
| AT5G61850 | AT2G34050 | Activation |
| AT5G61850 | AT2G34060 | Activation |
| AT5G61850 | AT2G34650 | Activation |
| AT5G61850 | AT2G34655 | Activation |
| AT5G61850 | AT2G34660 | Activation |
| AT5G61850 | AT2G35060 | Activation |
| AT5G61850 | AT2G35070 | Activation |
| AT5G61850 | AT2G35700 | Activation |
| AT5G61850 | AT2G35900 | Activation |
| AT5G61850 | AT2G35910 | Activation |
| AT5G61850 | AT2G35920 | Activation |
| AT5G61850 | AT2G35930 | Activation |
| AT5G61850 | AT2G35950 | Activation |
| AT5G61850 | AT2G36300 | Activation |
| AT5G61850 | AT2G36305 | Activation |
| AT5G61850 | AT2G36570 | Activation |
| AT5G61850 | AT2G36571 | Activation |
| AT5G61850 | AT2G36580 | Activation |
| AT5G61850 | AT2G36740 | Activation |
| AT5G61850 | AT2G36750 | Activation |
| AT5G61850 | AT2G36800 | Activation |
| AT5G61850 | AT2G36810 | Activation |
| AT5G61850 | AT2G36885 | Activation |
| AT5G61850 | AT2G36890 | Activation |
| AT5G61850 | AT2G36950 | Activation |
| AT5G61850 | AT2G36960 | Activation |
| AT5G61850 | AT2G37170 | Activation |
| AT5G61850 | AT2G37180 | Activation |
| AT5G61850 | AT2G37380 | Activation |
| AT5G61850 | AT2G37570 | Activation |
| AT5G61850 | AT2G37580 | Activation |
| AT5G61850 | AT2G37900 | Activation |
| AT5G61850 | AT2G37910 | Activation |
| AT5G61850 | AT2G38120 | Activation |
| AT5G61850 | AT2G38130 | Activation |
| AT5G61850 | AT2G38304 | Activation |
| AT5G61850 | AT2G38310 | Activation |
| AT5G61850 | AT2G38450 | Activation |
| AT5G61850 | AT2G38460 | Activation |
| AT5G61850 | AT2G38730 | Activation |
| AT5G61850 | AT2G38740 | Activation |
| AT5G61850 | AT2G38750 | Activation |
| AT5G61850 | AT2G39170 | Activation |
| AT5G61850 | AT2G39175 | Activation |
| AT5G61850 | AT2G39240 | Activation |
| AT5G61850 | AT2G39250 | Activation |
| AT5G61850 | AT2G39260 | Activation |
| AT5G61850 | AT2G39270 | Activation |
| AT5G61850 | AT2G39435 | Activation |
| AT5G61850 | AT2G39440 | Activation |

|           |           |            |
|-----------|-----------|------------|
| AT5G61850 | AT2G39710 | Activation |
| AT5G61850 | AT2G39720 | Activation |
| AT5G61850 | AT2G39800 | Activation |
| AT5G61850 | AT2G39805 | Activation |
| AT5G61850 | AT2G39865 | Activation |
| AT5G61850 | AT2G39870 | Activation |
| AT5G61850 | AT2G40330 | Activation |
| AT5G61850 | AT2G40340 | Activation |
| AT5G61850 | AT2G40600 | Activation |
| AT5G61850 | AT2G40610 | Activation |
| AT5G61850 | AT2G40660 | Activation |
| AT5G61850 | AT2G40670 | Activation |
| AT5G61850 | AT2G40890 | Activation |
| AT5G61850 | AT2G40900 | Activation |
| AT5G61850 | AT2G40940 | Activation |
| AT5G61850 | AT2G40950 | Activation |
| AT5G61850 | AT2G41000 | Activation |
| AT5G61850 | AT2G41010 | Activation |
| AT5G61850 | AT2G41170 | Activation |
| AT5G61850 | AT2G41178 | Activation |
| AT5G61850 | AT2G41240 | Activation |
| AT5G61850 | AT2G41250 | Activation |
| AT5G61850 | AT2G41260 | Activation |
| AT5G61850 | AT2G41280 | Activation |
| AT5G61850 | AT2G41310 | Activation |
| AT5G61850 | AT2G41370 | Activation |
| AT5G61850 | AT2G41380 | Activation |
| AT5G61850 | AT2G41745 | Activation |
| AT5G61850 | AT2G41750 | Activation |
| AT5G61850 | AT2G41810 | Activation |
| AT5G61850 | AT2G41820 | Activation |
| AT5G61850 | AT2G41940 | Activation |
| AT5G61850 | AT2G41945 | Activation |
| AT5G61850 | AT2G41950 | Activation |
| AT5G61850 | AT2G41997 | Activation |
| AT5G61850 | AT2G42020 | Activation |
| AT5G61850 | AT2G42030 | Activation |
| AT5G61850 | AT2G42180 | Activation |
| AT5G61850 | AT2G42190 | Activation |
| AT5G61850 | AT2G42430 | Activation |
| AT5G61850 | AT2G42440 | Activation |
| AT5G61850 | AT2G42530 | Activation |
| AT5G61850 | AT2G42540 | Activation |
| AT5G61850 | AT2G42870 | Activation |
| AT5G61850 | AT2G42880 | Activation |
| AT5G61850 | AT2G43050 | Activation |
| AT5G61850 | AT2G43060 | Activation |
| AT5G61850 | AT2G43240 | Activation |
| AT5G61850 | AT2G43250 | Activation |
| AT5G61850 | AT2G43290 | Activation |
| AT5G61850 | AT2G43300 | Activation |
| AT5G61850 | AT2G43310 | Activation |

|           |           |            |
|-----------|-----------|------------|
| AT5G61850 | AT2G43320 | Activation |
| AT5G61850 | AT2G43330 | Activation |
| AT5G61850 | AT2G43390 | Activation |
| AT5G61850 | AT2G43400 | Activation |
| AT5G61850 | AT2G43560 | Activation |
| AT5G61850 | AT2G43570 | Activation |
| AT5G61850 | AT2G44050 | Activation |
| AT5G61850 | AT2G44060 | Activation |
| AT5G61850 | AT2G44065 | Activation |
| AT5G61850 | AT2G44480 | Activation |
| AT5G61850 | AT2G44490 | Activation |
| AT5G61850 | AT2G44570 | Activation |
| AT5G61850 | AT2G44581 | Activation |
| AT5G61850 | AT2G44600 | Activation |
| AT5G61850 | AT2G44610 | Activation |
| AT5G61850 | AT2G44760 | Activation |
| AT5G61850 | AT2G44770 | Activation |
| AT5G61850 | AT2G44910 | Activation |
| AT5G61850 | AT2G44920 | Activation |
| AT5G61850 | AT2G45050 | Activation |
| AT5G61850 | AT2G45060 | Activation |
| AT5G61850 | AT2G45070 | Activation |
| AT5G61850 | AT2G45120 | Activation |
| AT5G61850 | AT2G45126 | Activation |
| AT5G61850 | AT2G45130 | Activation |
| AT5G61850 | AT2G45200 | Activation |
| AT5G61850 | AT2G45290 | Activation |
| AT5G61850 | AT2G45300 | Activation |
| AT5G61850 | AT2G45580 | Activation |
| AT5G61850 | AT2G45590 | Activation |
| AT5G61850 | AT2G45660 | Activation |
| AT5G61850 | AT2G45670 | Activation |
| AT5G61850 | AT2G45685 | Activation |
| AT5G61850 | AT2G45690 | Activation |
| AT5G61850 | AT2G45900 | Activation |
| AT5G61850 | AT2G46080 | Activation |
| AT5G61850 | AT2G46090 | Activation |
| AT5G61850 | AT2G46360 | Activation |
| AT5G61850 | AT2G46370 | Activation |
| AT5G61850 | AT2G46410 | Activation |
| AT5G61850 | AT2G46420 | Activation |
| AT5G61850 | AT2G46610 | Activation |
| AT5G61850 | AT2G46620 | Activation |
| AT5G61850 | AT2G46840 | Activation |
| AT5G61850 | AT2G46850 | Activation |
| AT5G61850 | AT2G46940 | Activation |
| AT5G61850 | AT2G46950 | Activation |
| AT5G61850 | AT2G46960 | Activation |
| AT5G61850 | AT2G47160 | Activation |
| AT5G61850 | AT2G47170 | Activation |
| AT5G61850 | AT2G47230 | Activation |
| AT5G61850 | AT2G47240 | Activation |

|           |           |            |
|-----------|-----------|------------|
| AT5G61850 | AT2G47250 | Activation |
| AT5G61850 | AT2G47260 | Activation |
| AT5G61850 | AT2G47270 | Activation |
| AT5G61850 | AT2G47440 | Activation |
| AT5G61850 | AT2G47450 | Activation |
| AT5G61850 | AT2G47460 | Activation |
| AT5G61850 | AT2G47470 | Activation |
| AT5G61850 | AT2G47560 | Activation |
| AT5G61850 | AT2G47570 | Activation |
| AT5G61850 | AT3G01090 | Activation |
| AT5G61850 | AT3G01100 | Activation |
| AT5G61850 | AT3G01120 | Activation |
| AT5G61850 | AT3G01140 | Activation |
| AT5G61850 | AT3G01150 | Activation |
| AT5G61850 | AT3G01250 | Activation |
| AT5G61850 | AT3G01260 | Activation |
| AT5G61850 | AT3G01270 | Activation |
| AT5G61850 | AT3G01490 | Activation |
| AT5G61850 | AT3G01500 | Activation |
| AT5G61850 | AT3G01680 | Activation |
| AT5G61850 | AT3G01690 | Activation |
| AT5G61850 | AT3G02000 | Activation |
| AT5G61850 | AT3G02010 | Activation |
| AT5G61850 | AT3G02170 | Activation |
| AT5G61850 | AT3G02180 | Activation |
| AT5G61850 | AT3G02242 | Activation |
| AT5G61850 | AT3G02250 | Activation |
| AT5G61850 | AT3G02460 | Activation |
| AT5G61850 | AT3G02470 | Activation |
| AT5G61850 | AT3G03160 | Activation |
| AT5G61850 | AT3G03170 | Activation |
| AT5G61850 | AT3G03180 | Activation |
| AT5G61850 | AT3G03190 | Activation |
| AT5G61850 | AT3G03200 | Activation |
| AT5G61850 | AT3G03210 | Activation |
| AT5G61850 | AT3G03430 | Activation |
| AT5G61850 | AT3G03440 | Activation |
| AT5G61850 | AT3G04450 | Activation |
| AT5G61850 | AT3G04460 | Activation |
| AT5G61850 | AT3G04510 | Activation |
| AT5G61850 | AT3G04520 | Activation |
| AT5G61850 | AT3G04570 | Activation |
| AT5G61850 | AT3G04580 | Activation |
| AT5G61850 | AT3G04620 | Activation |
| AT5G61850 | AT3G04630 | Activation |
| AT5G61850 | AT3G04730 | Activation |
| AT5G61850 | AT3G04732 | Activation |
| AT5G61850 | AT3G04860 | Activation |
| AT5G61850 | AT3G04870 | Activation |
| AT5G61850 | AT3G04910 | Activation |
| AT5G61850 | AT3G04920 | Activation |
| AT5G61850 | AT3G05155 | Activation |



|           |           |            |
|-----------|-----------|------------|
| AT5G61850 | AT3G05160 | Activation |
| AT5G61850 | AT3G05193 | Activation |
| AT5G61850 | AT3G05200 | Activation |
| AT5G61850 | AT3G05210 | Activation |
| AT5G61850 | AT3G05220 | Activation |
| AT5G61850 | AT3G05230 | Activation |
| AT5G61850 | AT3G05480 | Activation |
| AT5G61850 | AT3G05490 | Activation |
| AT5G61850 | AT3G05540 | Activation |
| AT5G61850 | AT3G05545 | Activation |
| AT5G61850 | AT3G05700 | Activation |
| AT5G61850 | AT3G05710 | Activation |
| AT5G61850 | AT3G05800 | Activation |
| AT5G61850 | AT3G05810 | Activation |
| AT5G61850 | AT3G05835 | Activation |
| AT5G61850 | AT3G05840 | Activation |
| AT5G61850 | AT3G05980 | Activation |
| AT5G61850 | AT3G05990 | Activation |
| AT5G61850 | AT3G06150 | Activation |
| AT5G61850 | AT3G06160 | Activation |
| AT5G61850 | AT3G06410 | Activation |
| AT5G61850 | AT3G06420 | Activation |
| AT5G61850 | AT3G06500 | Activation |
| AT5G61850 | AT3G06510 | Activation |
| AT5G61850 | AT3G06520 | Activation |
| AT5G61850 | AT3G06630 | Activation |
| AT5G61850 | AT3G06640 | Activation |
| AT5G61850 | AT3G06940 | Activation |
| AT5G61850 | AT3G06950 | Activation |
| AT5G61850 | AT3G06960 | Activation |
| AT5G61850 | AT3G06990 | Activation |
| AT5G61850 | AT3G07000 | Activation |
| AT5G61850 | AT3G07340 | Activation |
| AT5G61850 | AT3G07350 | Activation |
| AT5G61850 | AT3G07750 | Activation |
| AT5G61850 | AT3G07760 | Activation |
| AT5G61850 | AT3G08030 | Activation |
| AT5G61850 | AT3G08040 | Activation |
| AT5G61850 | AT3G08580 | Activation |
| AT5G61850 | AT3G08590 | Activation |
| AT5G61850 | AT3G08730 | Activation |
| AT5G61850 | AT3G08740 | Activation |
| AT5G61850 | AT3G08810 | Activation |
| AT5G61850 | AT3G08820 | Activation |
| AT5G61850 | AT3G08970 | Activation |
| AT5G61850 | AT3G08980 | Activation |
| AT5G61850 | AT3G09380 | Activation |
| AT5G61850 | AT3G09390 | Activation |
| AT5G61850 | AT3G09400 | Activation |
| AT5G61850 | AT3G09595 | Activation |
| AT5G61850 | AT3G09600 | Activation |
| AT5G61850 | AT3G09975 | Activation |

|           |           |            |
|-----------|-----------|------------|
| AT5G61850 | AT3G09980 | Activation |
| AT5G61850 | AT3G09990 | Activation |
| AT5G61850 | AT3G10480 | Activation |
| AT5G61850 | AT3G10490 | Activation |
| AT5G61850 | AT3G10720 | Activation |
| AT5G61850 | AT3G10730 | Activation |
| AT5G61850 | AT3G10760 | Activation |
| AT5G61850 | AT3G10770 | Activation |
| AT5G61850 | AT3G10840 | Activation |
| AT5G61850 | AT3G10845 | Activation |
| AT5G61850 | AT3G10970 | Activation |
| AT5G61850 | AT3G10974 | Activation |
| AT5G61850 | AT3G11405 | Activation |
| AT5G61850 | AT3G11410 | Activation |
| AT5G61850 | AT3G11690 | Activation |
| AT5G61850 | AT3G11700 | Activation |
| AT5G61850 | AT3G11850 | Activation |
| AT5G61850 | AT3G11860 | Activation |
| AT5G61850 | AT3G12120 | Activation |
| AT5G61850 | AT3G12130 | Activation |
| AT5G61850 | AT3G12150 | Activation |
| AT5G61850 | AT3G12160 | Activation |
| AT5G61850 | AT3G12835 | Activation |
| AT5G61850 | AT3G12840 | Activation |
| AT5G61850 | AT3G12850 | Activation |
| AT5G61850 | AT3G12915 | Activation |
| AT5G61850 | AT3G12920 | Activation |
| AT5G61850 | AT3G12965 | Activation |
| AT5G61850 | AT3G12970 | Activation |
| AT5G61850 | AT3G12977 | Activation |
| AT5G61850 | AT3G12980 | Activation |
| AT5G61850 | AT3G13560 | Activation |
| AT5G61850 | AT3G13570 | Activation |
| AT5G61850 | AT3G13580 | Activation |
| AT5G61850 | AT3G13686 | Activation |
| AT5G61850 | AT3G13690 | Activation |
| AT5G61850 | AT3G13710 | Activation |
| AT5G61850 | AT3G13870 | Activation |
| AT5G61850 | AT3G13880 | Activation |
| AT5G61850 | AT3G13950 | Activation |
| AT5G61850 | AT3G13960 | Activation |
| AT5G61850 | AT3G14050 | Activation |
| AT5G61850 | AT3G14060 | Activation |
| AT5G61850 | AT3G14080 | Activation |
| AT5G61850 | AT3G14090 | Activation |
| AT5G61850 | AT3G14100 | Activation |
| AT5G61850 | AT3G14640 | Activation |
| AT5G61850 | AT3G14650 | Activation |
| AT5G61850 | AT3G14680 | Activation |
| AT5G61850 | AT3G14690 | Activation |
| AT5G61850 | AT3G14710 | Activation |
| AT5G61850 | AT3G14720 | Activation |

|           |           |            |
|-----------|-----------|------------|
| AT5G61850 | AT3G14810 | Activation |
| AT5G61850 | AT3G14820 | Activation |
| AT5G61850 | AT3G14870 | Activation |
| AT5G61850 | AT3G14880 | Activation |
| AT5G61850 | AT3G14980 | Activation |
| AT5G61850 | AT3G14990 | Activation |
| AT5G61850 | AT3G15095 | Activation |
| AT5G61850 | AT3G15110 | Activation |
| AT5G61850 | AT3G15200 | Activation |
| AT5G61850 | AT3G15210 | Activation |
| AT5G61850 | AT3G15340 | Activation |
| AT5G61850 | AT3G15350 | Activation |
| AT5G61850 | AT3G15420 | Activation |
| AT5G61850 | AT3G15430 | Activation |
| AT5G61850 | AT3G15500 | Activation |
| AT5G61850 | AT3G15750 | Activation |
| AT5G61850 | AT3G15760 | Activation |
| AT5G61850 | AT3G15780 | Activation |
| AT5G61850 | AT3G15790 | Activation |
| AT5G61850 | AT3G16070 | Activation |
| AT5G61850 | AT3G16080 | Activation |
| AT5G61850 | AT3G16570 | Activation |
| AT5G61850 | AT3G16580 | Activation |
| AT5G61850 | AT3G16860 | Activation |
| AT5G61850 | AT3G16870 | Activation |
| AT5G61850 | AT3G17185 | Activation |
| AT5G61850 | AT3G17200 | Activation |
| AT5G61850 | AT3G17205 | Activation |
| AT5G61850 | AT3G17680 | Activation |
| AT5G61850 | AT3G17690 | Activation |
| AT5G61850 | AT3G17700 | Activation |
| AT5G61850 | AT3G17730 | Activation |
| AT5G61850 | AT3G17740 | Activation |
| AT5G61850 | AT3G17820 | Activation |
| AT5G61850 | AT3G17830 | Activation |
| AT5G61850 | AT3G18490 | Activation |
| AT5G61850 | AT3G18500 | Activation |
| AT5G61850 | AT3G18930 | Activation |
| AT5G61850 | AT3G18940 | Activation |
| AT5G61850 | AT3G18970 | Activation |
| AT5G61850 | AT3G18980 | Activation |
| AT5G61850 | AT3G19002 | Activation |
| AT5G61850 | AT3G19010 | Activation |
| AT5G61850 | AT3G19020 | Activation |
| AT5G61850 | AT3G19030 | Activation |
| AT5G61850 | AT3G19035 | Activation |
| AT5G61850 | AT3G19130 | Activation |
| AT5G61850 | AT3G19140 | Activation |
| AT5G61850 | AT3G19180 | Activation |
| AT5G61850 | AT3G19184 | Activation |
| AT5G61850 | AT3G19190 | Activation |
| AT5G61850 | AT3G19790 | Activation |

|           |           |            |
|-----------|-----------|------------|
| AT5G61850 | AT3G19800 | Activation |
| AT5G61850 | AT3G19810 | Activation |
| AT5G61850 | AT3G19820 | Activation |
| AT5G61850 | AT3G19830 | Activation |
| AT5G61850 | AT3G19860 | Activation |
| AT5G61850 | AT3G19870 | Activation |
| AT5G61850 | AT3G20010 | Activation |
| AT5G61850 | AT3G20015 | Activation |
| AT5G61850 | AT3G20080 | Activation |
| AT5G61850 | AT3G20085 | Activation |
| AT5G61850 | AT3G20400 | Activation |
| AT5G61850 | AT3G20410 | Activation |
| AT5G61850 | AT3G20420 | Activation |
| AT5G61850 | AT3G20630 | Activation |
| AT5G61850 | AT3G20640 | Activation |
| AT5G61850 | AT3G20650 | Activation |
| AT5G61850 | AT3G20655 | Activation |
| AT5G61850 | AT3G20660 | Activation |
| AT5G61850 | AT3G20670 | Activation |
| AT5G61850 | AT3G20710 | Activation |
| AT5G61850 | AT3G20720 | Activation |
| AT5G61850 | AT3G21320 | Activation |
| AT5G61850 | AT3G21400 | Activation |
| AT5G61850 | AT3G21410 | Activation |
| AT5G61850 | AT3G21890 | Activation |
| AT5G61850 | AT3G21900 | Activation |
| AT5G61850 | AT3G22121 | Activation |
| AT5G61850 | AT3G22133 | Activation |
| AT5G61850 | AT3G22142 | Activation |
| AT5G61850 | AT3G22150 | Activation |
| AT5G61850 | AT3G22810 | Activation |
| AT5G61850 | AT3G22820 | Activation |
| AT5G61850 | AT3G22830 | Activation |
| AT5G61850 | AT3G22840 | Activation |
| AT5G61850 | AT3G22845 | Activation |
| AT5G61850 | AT3G22920 | Activation |
| AT5G61850 | AT3G22930 | Activation |
| AT5G61850 | AT3G23000 | Activation |
| AT5G61850 | AT3G23170 | Activation |
| AT5G61850 | AT3G23171 | Activation |
| AT5G61850 | AT3G23172 | Activation |
| AT5G61850 | AT3G23210 | Activation |
| AT5G61850 | AT3G23220 | Activation |
| AT5G61850 | AT3G23440 | Activation |
| AT5G61850 | AT3G24180 | Activation |
| AT5G61850 | AT3G24190 | Activation |
| AT5G61850 | AT3G24480 | Activation |
| AT5G61850 | AT3G24503 | Activation |
| AT5G61850 | AT3G24506 | Activation |
| AT5G61850 | AT3G25655 | Activation |
| AT5G61850 | AT3G25660 | Activation |
| AT5G61850 | AT3G25710 | Activation |

|           |           |            |
|-----------|-----------|------------|
| AT5G61850 | AT3G25880 | Activation |
| AT5G61850 | AT3G26085 | Activation |
| AT5G61850 | AT3G26090 | Activation |
| AT5G61850 | AT3G26160 | Activation |
| AT5G61850 | AT3G26170 | Activation |
| AT5G61850 | AT3G26210 | Activation |
| AT5G61850 | AT3G26220 | Activation |
| AT5G61850 | AT3G26230 | Activation |
| AT5G61850 | AT3G26511 | Activation |
| AT5G61850 | AT3G26700 | Activation |
| AT5G61850 | AT3G26710 | Activation |
| AT5G61850 | AT3G26720 | Activation |
| AT5G61850 | AT3G26730 | Activation |
| AT5G61850 | AT3G26740 | Activation |
| AT5G61850 | AT3G27010 | Activation |
| AT5G61850 | AT3G27020 | Activation |
| AT5G61850 | AT3G27160 | Activation |
| AT5G61850 | AT3G27170 | Activation |
| AT5G61850 | AT3G27190 | Activation |
| AT5G61850 | AT3G27200 | Activation |
| AT5G61850 | AT3G27210 | Activation |
| AT5G61850 | AT3G27220 | Activation |
| AT5G61850 | AT3G27260 | Activation |
| AT5G61850 | AT3G27330 | Activation |
| AT5G61850 | AT3G27340 | Activation |
| AT5G61850 | AT3G27380 | Activation |
| AT5G61850 | AT3G27390 | Activation |
| AT5G61850 | AT3G27960 | Activation |
| AT5G61850 | AT3G27965 | Activation |
| AT5G61850 | AT3G28030 | Activation |
| AT5G61850 | AT3G28040 | Activation |
| AT5G61850 | AT3G28060 | Activation |
| AT5G61850 | AT3G28070 | Activation |
| AT5G61850 | AT3G28080 | Activation |
| AT5G61850 | AT3G28100 | Activation |
| AT5G61850 | AT3G28110 | Activation |
| AT5G61850 | AT3G28120 | Activation |
| AT5G61850 | AT3G28130 | Activation |
| AT5G61850 | AT3G28180 | Activation |
| AT5G61850 | AT3G28685 | Activation |
| AT5G61850 | AT3G28690 | Activation |
| AT5G61850 | AT3G28910 | Activation |
| AT5G61850 | AT3G29034 | Activation |
| AT5G61850 | AT3G29035 | Activation |
| AT5G61850 | AT3G29040 | Activation |
| AT5G61850 | AT3G29360 | Activation |
| AT5G61850 | AT3G29647 | Activation |
| AT5G61850 | AT3G30170 | Activation |
| AT5G61850 | AT3G30300 | Activation |
| AT5G61850 | AT3G30340 | Activation |
| AT5G61850 | AT3G42160 | Activation |
| AT5G61850 | AT3G42170 | Activation |

|           |           |            |
|-----------|-----------|------------|
| AT5G61850 | AT3G42786 | Activation |
| AT5G61850 | AT3G42790 | Activation |
| AT5G61850 | AT3G43110 | Activation |
| AT5G61850 | AT3G43120 | Activation |
| AT5G61850 | AT3G43205 | Activation |
| AT5G61850 | AT3G43720 | Activation |
| AT5G61850 | AT3G43722 | Activation |
| AT5G61850 | AT3G43910 | Activation |
| AT5G61850 | AT3G43920 | Activation |
| AT5G61850 | AT3G44100 | Activation |
| AT5G61850 | AT3G44110 | Activation |
| AT5G61850 | AT3G44310 | Activation |
| AT5G61850 | AT3G44320 | Activation |
| AT5G61850 | AT3G44380 | Activation |
| AT5G61850 | AT3G44390 | Activation |
| AT5G61850 | AT3G44720 | Activation |
| AT5G61850 | AT3G44735 | Activation |
| AT5G61850 | AT3G44740 | Activation |
| AT5G61850 | AT3G44990 | Activation |
| AT5G61850 | AT3G45210 | Activation |
| AT5G61850 | AT3G45600 | Activation |
| AT5G61850 | AT3G45610 | Activation |
| AT5G61850 | AT3G45775 | Activation |
| AT5G61850 | AT3G45780 | Activation |
| AT5G61850 | AT3G45955 | Activation |
| AT5G61850 | AT3G45960 | Activation |
| AT5G61850 | AT3G46000 | Activation |
| AT5G61850 | AT3G46010 | Activation |
| AT5G61850 | AT3G46020 | Activation |
| AT5G61850 | AT3G46130 | Activation |
| AT5G61850 | AT3G46140 | Activation |
| AT5G61850 | AT3G46370 | Activation |
| AT5G61850 | AT3G47210 | Activation |
| AT5G61850 | AT3G47220 | Activation |
| AT5G61850 | AT3G47341 | Activation |
| AT5G61850 | AT3G47342 | Activation |
| AT5G61850 | AT3G47420 | Activation |
| AT5G61850 | AT3G47430 | Activation |
| AT5G61850 | AT3G48205 | Activation |
| AT5G61850 | AT3G48208 | Activation |
| AT5G61850 | AT3G48237 | Activation |
| AT5G61850 | AT3G48240 | Activation |
| AT5G61850 | AT3G48250 | Activation |
| AT5G61850 | AT3G48360 | Activation |
| AT5G61850 | AT3G48370 | Activation |
| AT5G61850 | AT3G48780 | Activation |
| AT5G61850 | AT3G48790 | Activation |
| AT5G61850 | AT3G48980 | Activation |
| AT5G61850 | AT3G48990 | Activation |
| AT5G61850 | AT3G49000 | Activation |
| AT5G61850 | AT3G49350 | Activation |
| AT5G61850 | AT3G49360 | Activation |

|           |           |            |
|-----------|-----------|------------|
| AT5G61850 | AT3G49410 | Activation |
| AT5G61850 | AT3G49420 | Activation |
| AT5G61850 | AT3G49660 | Activation |
| AT5G61850 | AT3G49668 | Activation |
| AT5G61850 | AT3G49940 | Activation |
| AT5G61850 | AT3G50240 | Activation |
| AT5G61850 | AT3G50250 | Activation |
| AT5G61850 | AT3G50390 | Activation |
| AT5G61850 | AT3G50400 | Activation |
| AT5G61850 | AT3G50410 | Activation |
| AT5G61850 | AT3G50560 | Activation |
| AT5G61850 | AT3G50570 | Activation |
| AT5G61850 | AT3G50630 | Activation |
| AT5G61850 | AT3G50640 | Activation |
| AT5G61850 | AT3G50750 | Activation |
| AT5G61850 | AT3G50751 | Activation |
| AT5G61850 | AT3G50790 | Activation |
| AT5G61850 | AT3G50800 | Activation |
| AT5G61850 | AT3G51430 | Activation |
| AT5G61850 | AT3G51440 | Activation |
| AT5G61850 | AT3G51450 | Activation |
| AT5G61850 | AT3G51490 | Activation |
| AT5G61850 | AT3G51500 | Activation |
| AT5G61850 | AT3G51580 | Activation |
| AT5G61850 | AT3G51590 | Activation |
| AT5G61850 | AT3G51600 | Activation |
| AT5G61850 | AT3G51630 | Activation |
| AT5G61850 | AT3G51636 | Activation |
| AT5G61850 | AT3G51640 | Activation |
| AT5G61850 | AT3G51710 | Activation |
| AT5G61850 | AT3G51720 | Activation |
| AT5G61850 | AT3G51940 | Activation |
| AT5G61850 | AT3G51950 | Activation |
| AT5G61850 | AT3G51960 | Activation |
| AT5G61850 | AT3G52220 | Activation |
| AT5G61850 | AT3G52230 | Activation |
| AT5G61850 | AT3G52240 | Activation |
| AT5G61850 | AT3G52460 | Activation |
| AT5G61850 | AT3G52870 | Activation |
| AT5G61850 | AT3G52880 | Activation |
| AT5G61850 | AT3G53460 | Activation |
| AT5G61850 | AT3G53470 | Activation |
| AT5G61850 | AT3G53480 | Activation |
| AT5G61850 | AT3G53680 | Activation |
| AT5G61850 | AT3G53690 | Activation |
| AT5G61850 | AT3G53700 | Activation |
| AT5G61850 | AT3G53710 | Activation |
| AT5G61850 | AT3G53920 | Activation |
| AT5G61850 | AT3G53930 | Activation |
| AT5G61850 | AT3G53940 | Activation |
| AT5G61850 | AT3G53950 | Activation |
| AT5G61850 | AT3G53960 | Activation |

|           |           |            |
|-----------|-----------|------------|
| AT5G61850 | AT3G53980 | Activation |
| AT5G61850 | AT3G53990 | Activation |
| AT5G61850 | AT3G54320 | Activation |
| AT5G61850 | AT3G54730 | Activation |
| AT5G61850 | AT3G54740 | Activation |
| AT5G61850 | AT3G54826 | Activation |
| AT5G61850 | AT3G54830 | Activation |
| AT5G61850 | AT3G54880 | Activation |
| AT5G61850 | AT3G54890 | Activation |
| AT5G61850 | AT3G55060 | Activation |
| AT5G61850 | AT3G55070 | Activation |
| AT5G61850 | AT3G55240 | Activation |
| AT5G61850 | AT3G55250 | Activation |
| AT5G61850 | AT3G55280 | Activation |
| AT5G61850 | AT3G55290 | Activation |
| AT5G61850 | AT3G55440 | Activation |
| AT5G61850 | AT3G55450 | Activation |
| AT5G61850 | AT3G55560 | Activation |
| AT5G61850 | AT3G55566 | Activation |
| AT5G61850 | AT3G55610 | Activation |
| AT5G61850 | AT3G55620 | Activation |
| AT5G61850 | AT3G55980 | Activation |
| AT5G61850 | AT3G56120 | Activation |
| AT5G61850 | AT3G56130 | Activation |
| AT5G61850 | AT3G56140 | Activation |
| AT5G61850 | AT3G56950 | Activation |
| AT5G61850 | AT3G56960 | Activation |
| AT5G61850 | AT3G57000 | Activation |
| AT5G61850 | AT3G57010 | Activation |
| AT5G61850 | AT3G57020 | Activation |
| AT5G61850 | AT3G57040 | Activation |
| AT5G61850 | AT3G57050 | Activation |
| AT5G61850 | AT3G57060 | Activation |
| AT5G61850 | AT3G57130 | Activation |
| AT5G61850 | AT3G57540 | Activation |
| AT5G61850 | AT3G57550 | Activation |
| AT5G61850 | AT3G57790 | Activation |
| AT5G61850 | AT3G57800 | Activation |
| AT5G61850 | AT3G57810 | Activation |
| AT5G61850 | AT3G57870 | Activation |
| AT5G61850 | AT3G57880 | Activation |
| AT5G61850 | AT3G58070 | Activation |
| AT5G61850 | AT3G58080 | Activation |
| AT5G61850 | AT3G58670 | Activation |
| AT5G61850 | AT3G58676 | Activation |
| AT5G61850 | AT3G58680 | Activation |
| AT5G61850 | AT3G58710 | Activation |
| AT5G61850 | AT3G58720 | Activation |
| AT5G61850 | AT3G58730 | Activation |
| AT5G61850 | AT3G59410 | Activation |
| AT5G61850 | AT3G59415 | Activation |
| AT5G61850 | AT3G59420 | Activation |



|           |           |            |
|-----------|-----------|------------|
| AT5G61850 | AT3G59430 | Activation |
| AT5G61850 | AT3G59440 | Activation |
| AT5G61850 | AT3G59470 | Activation |
| AT5G61850 | AT3G59480 | Activation |
| AT5G61850 | AT3G59680 | Activation |
| AT5G61850 | AT3G59690 | Activation |
| AT5G61850 | AT3G60120 | Activation |
| AT5G61850 | AT3G60380 | Activation |
| AT5G61850 | AT3G60390 | Activation |
| AT5G61850 | AT3G60520 | Activation |
| AT5G61850 | AT3G60530 | Activation |
| AT5G61850 | AT3G60620 | Activation |
| AT5G61850 | AT3G60630 | Activation |
| AT5G61850 | AT3G60660 | Activation |
| AT5G61850 | AT3G60670 | Activation |
| AT5G61850 | AT3G60897 | Activation |
| AT5G61850 | AT3G60900 | Activation |
| AT5G61850 | AT3G61150 | Activation |
| AT5G61850 | AT3G61160 | Activation |
| AT5G61850 | AT3G61240 | Activation |
| AT5G61850 | AT3G61630 | Activation |
| AT5G61850 | AT3G61640 | Activation |
| AT5G61850 | AT3G61750 | Activation |
| AT5G61850 | AT3G61755 | Activation |
| AT5G61850 | AT3G62130 | Activation |
| AT5G61850 | AT3G62140 | Activation |
| AT5G61850 | AT3G62150 | Activation |
| AT5G61850 | AT3G62528 | Activation |
| AT5G61850 | AT3G62820 | Activation |
| AT5G61850 | AT3G62830 | Activation |
| AT5G61850 | AT3G62980 | Activation |
| AT5G61850 | AT3G62988 | Activation |
| AT5G61850 | AT3G63006 | Activation |
| AT5G61850 | AT3G63010 | Activation |
| AT5G61850 | AT3G63020 | Activation |
| AT5G61850 | AT3G63180 | Activation |
| AT5G61850 | AT3G63190 | Activation |
| AT5G61850 | AT3G63233 | Activation |
| AT5G61850 | AT3G63240 | Activation |
| AT5G61850 | AT3G63450 | Activation |
| AT5G61850 | AT3G63460 | Activation |
| AT5G61850 | AT3G63520 | Activation |
| AT5G61850 | AT3G63530 | Activation |
| AT5G61850 | AT3G63540 | Activation |
| AT5G61850 | AT3G66652 | Activation |
| AT5G61850 | AT3G66654 | Activation |
| AT5G61850 | AT4G00140 | Activation |
| AT5G61850 | AT4G00150 | Activation |
| AT5G61850 | AT4G00165 | Activation |
| AT5G61850 | AT4G00170 | Activation |
| AT5G61850 | AT4G00300 | Activation |
| AT5G61850 | AT4G00305 | Activation |

|           |           |            |
|-----------|-----------|------------|
| AT5G61850 | AT4G00310 | Activation |
| AT5G61850 | AT4G00370 | Activation |
| AT5G61850 | AT4G00380 | Activation |
| AT5G61850 | AT4G00430 | Activation |
| AT5G61850 | AT4G00570 | Activation |
| AT5G61850 | AT4G00580 | Activation |
| AT5G61850 | AT4G00690 | Activation |
| AT5G61850 | AT4G00695 | Activation |
| AT5G61850 | AT4G00700 | Activation |
| AT5G61850 | AT4G01050 | Activation |
| AT5G61850 | AT4G01060 | Activation |
| AT5G61850 | AT4G01090 | Activation |
| AT5G61850 | AT4G01100 | Activation |
| AT5G61850 | AT4G01120 | Activation |
| AT5G61850 | AT4G01130 | Activation |
| AT5G61850 | AT4G01330 | Activation |
| AT5G61850 | AT4G01335 | Activation |
| AT5G61850 | AT4G01460 | Activation |
| AT5G61850 | AT4G01480 | Activation |
| AT5G61850 | AT4G01490 | Activation |
| AT5G61850 | AT4G01500 | Activation |
| AT5G61850 | AT4G03110 | Activation |
| AT5G61850 | AT4G03113 | Activation |
| AT5G61850 | AT4G03115 | Activation |
| AT5G61850 | AT4G03280 | Activation |
| AT5G61850 | AT4G03285 | Activation |
| AT5G61850 | AT4G03290 | Activation |
| AT5G61850 | AT4G03400 | Activation |
| AT5G61850 | AT4G03410 | Activation |
| AT5G61850 | AT4G03420 | Activation |
| AT5G61850 | AT4G03450 | Activation |
| AT5G61850 | AT4G03550 | Activation |
| AT5G61850 | AT4G03560 | Activation |
| AT5G61850 | AT4G05030 | Activation |
| AT5G61850 | AT4G05040 | Activation |
| AT5G61850 | AT4G05095 | Activation |
| AT5G61850 | AT4G05100 | Activation |
| AT5G61850 | AT4G08860 | Activation |
| AT5G61850 | AT4G08870 | Activation |
| AT5G61850 | AT4G08871 | Activation |
| AT5G61850 | AT4G09530 | Activation |
| AT5G61850 | AT4G10740 | Activation |
| AT5G61850 | AT4G10750 | Activation |
| AT5G61850 | AT4G10760 | Activation |
| AT5G61850 | AT4G11220 | Activation |
| AT5G61850 | AT4G11230 | Activation |
| AT5G61850 | AT4G11320 | Activation |
| AT5G61850 | AT4G11330 | Activation |
| AT5G61850 | AT4G11360 | Activation |
| AT5G61850 | AT4G11370 | Activation |
| AT5G61850 | AT4G11405 | Activation |
| AT5G61850 | AT4G11410 | Activation |

|           |           |            |
|-----------|-----------|------------|
| AT5G61850 | AT4G11960 | Activation |
| AT5G61850 | AT4G11970 | Activation |
| AT5G61850 | AT4G12090 | Activation |
| AT5G61850 | AT4G12700 | Activation |
| AT5G61850 | AT4G12710 | Activation |
| AT5G61850 | AT4G12790 | Activation |
| AT5G61850 | AT4G12800 | Activation |
| AT5G61850 | AT4G12810 | Activation |
| AT5G61850 | AT4G12960 | Activation |
| AT5G61850 | AT4G12970 | Activation |
| AT5G61850 | AT4G13400 | Activation |
| AT5G61850 | AT4G13410 | Activation |
| AT5G61850 | AT4G13420 | Activation |
| AT5G61850 | AT4G13600 | Activation |
| AT5G61850 | AT4G13610 | Activation |
| AT5G61850 | AT4G13790 | Activation |
| AT5G61850 | AT4G13800 | Activation |
| AT5G61850 | AT4G14230 | Activation |
| AT5G61850 | AT4G14240 | Activation |
| AT5G61850 | AT4G14390 | Activation |
| AT5G61850 | AT4G14400 | Activation |
| AT5G61850 | AT4G14530 | Activation |
| AT5G61850 | AT4G14540 | Activation |
| AT5G61850 | AT4G14590 | Activation |
| AT5G61850 | AT4G14600 | Activation |
| AT5G61850 | AT4G14740 | Activation |
| AT5G61850 | AT4G14930 | Activation |
| AT5G61850 | AT4G14940 | Activation |
| AT5G61850 | AT4G14950 | Activation |
| AT5G61850 | AT4G15160 | Activation |
| AT5G61850 | AT4G15248 | Activation |
| AT5G61850 | AT4G15250 | Activation |
| AT5G61850 | AT4G15410 | Activation |
| AT5G61850 | AT4G15415 | Activation |
| AT5G61850 | AT4G15420 | Activation |
| AT5G61850 | AT4G15430 | Activation |
| AT5G61850 | AT4G15440 | Activation |
| AT5G61850 | AT4G15450 | Activation |
| AT5G61850 | AT4G15530 | Activation |
| AT5G61850 | AT4G15540 | Activation |
| AT5G61850 | AT4G15620 | Activation |
| AT5G61850 | AT4G15630 | Activation |
| AT5G61850 | AT4G15830 | Activation |
| AT5G61850 | AT4G15840 | Activation |
| AT5G61850 | AT4G15955 | Activation |
| AT5G61850 | AT4G15960 | Activation |
| AT5G61850 | AT4G15970 | Activation |
| AT5G61850 | AT4G16130 | Activation |
| AT5G61850 | AT4G16140 | Activation |
| AT5G61850 | AT4G16280 | Activation |
| AT5G61850 | AT4G16295 | Activation |
| AT5G61850 | AT4G16370 | Activation |

|           |           |            |
|-----------|-----------|------------|
| AT5G61850 | AT4G16380 | Activation |
| AT5G61850 | AT4G16390 | Activation |
| AT5G61850 | AT4G16490 | Activation |
| AT5G61850 | AT4G16590 | Activation |
| AT5G61850 | AT4G16600 | Activation |
| AT5G61850 | AT4G16820 | Activation |
| AT5G61850 | AT4G16830 | Activation |
| AT5G61850 | AT4G17070 | Activation |
| AT5G61850 | AT4G17080 | Activation |
| AT5G61850 | AT4G17090 | Activation |
| AT5G61850 | AT4G17098 | Activation |
| AT5G61850 | AT4G17330 | Activation |
| AT5G61850 | AT4G17340 | Activation |
| AT5G61850 | AT4G17390 | Activation |
| AT5G61850 | AT4G17410 | Activation |
| AT5G61850 | AT4G17950 | Activation |
| AT5G61850 | AT4G17960 | Activation |
| AT5G61850 | AT4G18280 | Activation |
| AT5G61850 | AT4G18282 | Activation |
| AT5G61850 | AT4G18540 | Activation |
| AT5G61850 | AT4G18550 | Activation |
| AT5G61850 | AT4G18815 | Activation |
| AT5G61850 | AT4G18820 | Activation |
| AT5G61850 | AT4G18970 | Activation |
| AT5G61850 | AT4G19020 | Activation |
| AT5G61850 | AT4G19030 | Activation |
| AT5G61850 | AT4G19170 | Activation |
| AT5G61850 | AT4G19180 | Activation |
| AT5G61850 | AT4G19520 | Activation |
| AT5G61850 | AT4G19530 | Activation |
| AT5G61850 | AT4G20040 | Activation |
| AT5G61850 | AT4G20050 | Activation |
| AT5G61850 | AT4G20170 | Activation |
| AT5G61850 | AT4G20180 | Activation |
| AT5G61850 | AT4G20740 | Activation |
| AT5G61850 | AT4G20810 | Activation |
| AT5G61850 | AT4G21050 | Activation |
| AT5G61850 | AT4G21060 | Activation |
| AT5G61850 | AT4G21330 | Activation |
| AT5G61850 | AT4G21340 | Activation |
| AT5G61850 | AT4G21440 | Activation |
| AT5G61850 | AT4G21445 | Activation |
| AT5G61850 | AT4G21570 | Activation |
| AT5G61850 | AT4G21580 | Activation |
| AT5G61850 | AT4G21902 | Activation |
| AT5G61850 | AT4G21903 | Activation |
| AT5G61850 | AT4G21910 | Activation |
| AT5G61850 | AT4G21930 | Activation |
| AT5G61850 | AT4G21940 | Activation |
| AT5G61850 | AT4G21950 | Activation |
| AT5G61850 | AT4G21960 | Activation |
| AT5G61850 | AT4G22000 | Activation |

|           |           |            |
|-----------|-----------|------------|
| AT5G61850 | AT4G22010 | Activation |
| AT5G61850 | AT4G22030 | Activation |
| AT5G61850 | AT4G22190 | Activation |
| AT5G61850 | AT4G22200 | Activation |
| AT5G61850 | AT4G22540 | Activation |
| AT5G61850 | AT4G22770 | Activation |
| AT5G61850 | AT4G22785 | Activation |
| AT5G61850 | AT4G22850 | Activation |
| AT5G61850 | AT4G22860 | Activation |
| AT5G61850 | AT4G22980 | Activation |
| AT5G61850 | AT4G22990 | Activation |
| AT5G61850 | AT4G23210 | Activation |
| AT5G61850 | AT4G23220 | Activation |
| AT5G61850 | AT4G23240 | Activation |
| AT5G61850 | AT4G23250 | Activation |
| AT5G61850 | AT4G23515 | Activation |
| AT5G61850 | AT4G23520 | Activation |
| AT5G61850 | AT4G23530 | Activation |
| AT5G61850 | AT4G23620 | Activation |
| AT5G61850 | AT4G23630 | Activation |
| AT5G61850 | AT4G23750 | Activation |
| AT5G61850 | AT4G23760 | Activation |
| AT5G61850 | AT4G23770 | Activation |
| AT5G61850 | AT4G24026 | Activation |
| AT5G61850 | AT4G24040 | Activation |
| AT5G61850 | AT4G24231 | Activation |
| AT5G61850 | AT4G24240 | Activation |
| AT5G61850 | AT4G24265 | Activation |
| AT5G61850 | AT4G24270 | Activation |
| AT5G61850 | AT4G24340 | Activation |
| AT5G61850 | AT4G24350 | Activation |
| AT5G61850 | AT4G24780 | Activation |
| AT5G61850 | AT4G24790 | Activation |
| AT5G61850 | AT4G24973 | Activation |
| AT5G61850 | AT4G24974 | Activation |
| AT5G61850 | AT4G24975 | Activation |
| AT5G61850 | AT4G24980 | Activation |
| AT5G61850 | AT4G25160 | Activation |
| AT5G61850 | AT4G25170 | Activation |
| AT5G61850 | AT4G25180 | Activation |
| AT5G61850 | AT4G25190 | Activation |
| AT5G61850 | AT4G25200 | Activation |
| AT5G61850 | AT4G25210 | Activation |
| AT5G61850 | AT4G25350 | Activation |
| AT5G61850 | AT4G25360 | Activation |
| AT5G61850 | AT4G25420 | Activation |
| AT5G61850 | AT4G25430 | Activation |
| AT5G61850 | AT4G25520 | Activation |
| AT5G61850 | AT4G25530 | Activation |
| AT5G61850 | AT4G25570 | Activation |
| AT5G61850 | AT4G25580 | Activation |
| AT5G61850 | AT4G25640 | Activation |

|           |           |            |
|-----------|-----------|------------|
| AT5G61850 | AT4G25650 | Activation |
| AT5G61850 | AT4G25835 | Activation |
| AT5G61850 | AT4G25840 | Activation |
| AT5G61850 | AT4G25950 | Activation |
| AT5G61850 | AT4G25960 | Activation |
| AT5G61850 | AT4G25990 | Activation |
| AT5G61850 | AT4G26000 | Activation |
| AT5G61850 | AT4G26080 | Activation |
| AT5G61850 | AT4G26090 | Activation |
| AT5G61850 | AT4G26095 | Activation |
| AT5G61850 | AT4G26550 | Activation |
| AT5G61850 | AT4G26950 | Activation |
| AT5G61850 | AT4G27130 | Activation |
| AT5G61850 | AT4G27140 | Activation |
| AT5G61850 | AT4G27230 | Activation |
| AT5G61850 | AT4G27240 | Activation |
| AT5G61850 | AT4G27310 | Activation |
| AT5G61850 | AT4G27320 | Activation |
| AT5G61850 | AT4G27400 | Activation |
| AT5G61850 | AT4G27410 | Activation |
| AT5G61850 | AT4G27415 | Activation |
| AT5G61850 | AT4G27710 | Activation |
| AT5G61850 | AT4G27720 | Activation |
| AT5G61850 | AT4G27730 | Activation |
| AT5G61850 | AT4G27740 | Activation |
| AT5G61850 | AT4G27970 | Activation |
| AT5G61850 | AT4G27980 | Activation |
| AT5G61850 | AT4G28080 | Activation |
| AT5G61850 | AT4G28085 | Activation |
| AT5G61850 | AT4G28090 | Activation |
| AT5G61850 | AT4G28100 | Activation |
| AT5G61850 | AT4G28110 | Activation |
| AT5G61850 | AT4G28230 | Activation |
| AT5G61850 | AT4G28240 | Activation |
| AT5G61850 | AT4G28250 | Activation |
| AT5G61850 | AT4G28485 | Activation |
| AT5G61850 | AT4G28490 | Activation |
| AT5G61850 | AT4G28550 | Activation |
| AT5G61850 | AT4G28556 | Activation |
| AT5G61850 | AT4G28560 | Activation |
| AT5G61850 | AT4G28590 | Activation |
| AT5G61850 | AT4G28600 | Activation |
| AT5G61850 | AT4G28620 | Activation |
| AT5G61850 | AT4G28630 | Activation |
| AT5G61850 | AT4G28640 | Activation |
| AT5G61850 | AT4G29150 | Activation |
| AT5G61850 | AT4G29330 | Activation |
| AT5G61850 | AT4G29340 | Activation |
| AT5G61850 | AT4G29700 | Activation |
| AT5G61850 | AT4G29710 | Activation |
| AT5G61850 | AT4G29720 | Activation |
| AT5G61850 | AT4G29940 | Activation |

|           |           |            |
|-----------|-----------|------------|
| AT5G61850 | AT4G29950 | Activation |
| AT5G61850 | AT4G30070 | Activation |
| AT5G61850 | AT4G30074 | Activation |
| AT5G61850 | AT4G30120 | Activation |
| AT5G61850 | AT4G30140 | Activation |
| AT5G61850 | AT4G30150 | Activation |
| AT5G61850 | AT4G30190 | Activation |
| AT5G61850 | AT4G30210 | Activation |
| AT5G61850 | AT4G30220 | Activation |
| AT5G61850 | AT4G30250 | Activation |
| AT5G61850 | AT4G30260 | Activation |
| AT5G61850 | AT4G30270 | Activation |
| AT5G61850 | AT4G30490 | Activation |
| AT5G61850 | AT4G30500 | Activation |
| AT5G61850 | AT4G30750 | Activation |
| AT5G61850 | AT4G30760 | Activation |
| AT5G61850 | AT4G30950 | Activation |
| AT5G61850 | AT4G30960 | Activation |
| AT5G61850 | AT4G31130 | Activation |
| AT5G61850 | AT4G31136 | Activation |
| AT5G61850 | AT4G31490 | Activation |
| AT5G61850 | AT4G31500 | Activation |
| AT5G61850 | AT4G31510 | Activation |
| AT5G61850 | AT4G31800 | Activation |
| AT5G61850 | AT4G31875 | Activation |
| AT5G61850 | AT4G31877 | Activation |
| AT5G61850 | AT4G32120 | Activation |
| AT5G61850 | AT4G32130 | Activation |
| AT5G61850 | AT4G32140 | Activation |
| AT5G61850 | AT4G32330 | Activation |
| AT5G61850 | AT4G32340 | Activation |
| AT5G61850 | AT4G32342 | Activation |
| AT5G61850 | AT4G32480 | Activation |
| AT5G61850 | AT4G32880 | Activation |
| AT5G61850 | AT4G33010 | Activation |
| AT5G61850 | AT4G33020 | Activation |
| AT5G61850 | AT4G33090 | Activation |
| AT5G61850 | AT4G33100 | Activation |
| AT5G61850 | AT4G33150 | Activation |
| AT5G61850 | AT4G33160 | Activation |
| AT5G61850 | AT4G33430 | Activation |
| AT5G61850 | AT4G33440 | Activation |
| AT5G61850 | AT4G34100 | Activation |
| AT5G61850 | AT4G34110 | Activation |
| AT5G61850 | AT4G34170 | Activation |
| AT5G61850 | AT4G34760 | Activation |
| AT5G61850 | AT4G34940 | Activation |
| AT5G61850 | AT4G34950 | Activation |
| AT5G61850 | AT4G35010 | Activation |
| AT5G61850 | AT4G35020 | Activation |
| AT5G61850 | AT4G35090 | Activation |
| AT5G61850 | AT4G35100 | Activation |

|           |           |            |
|-----------|-----------|------------|
| AT5G61850 | AT4G35110 | Activation |
| AT5G61850 | AT4G35240 | Activation |
| AT5G61850 | AT4G35690 | Activation |
| AT5G61850 | AT4G35700 | Activation |
| AT5G61850 | AT4G35780 | Activation |
| AT5G61850 | AT4G35783 | Activation |
| AT5G61850 | AT4G35890 | Activation |
| AT5G61850 | AT4G35900 | Activation |
| AT5G61850 | AT4G36170 | Activation |
| AT5G61850 | AT4G36180 | Activation |
| AT5G61850 | AT4G36190 | Activation |
| AT5G61850 | AT4G36210 | Activation |
| AT5G61850 | AT4G36220 | Activation |
| AT5G61850 | AT4G36230 | Activation |
| AT5G61850 | AT4G36245 | Activation |
| AT5G61850 | AT4G36250 | Activation |
| AT5G61850 | AT4G36260 | Activation |
| AT5G61850 | AT4G36268 | Activation |
| AT5G61850 | AT4G36710 | Activation |
| AT5G61850 | AT4G36760 | Activation |
| AT5G61850 | AT4G36770 | Activation |
| AT5G61850 | AT4G36780 | Activation |
| AT5G61850 | AT4G36850 | Activation |
| AT5G61850 | AT4G36860 | Activation |
| AT5G61850 | AT4G36925 | Activation |
| AT5G61850 | AT4G36950 | Activation |
| AT5G61850 | AT4G36960 | Activation |
| AT5G61850 | AT4G37140 | Activation |
| AT5G61850 | AT4G37150 | Activation |
| AT5G61850 | AT4G37160 | Activation |
| AT5G61850 | AT4G37170 | Activation |
| AT5G61850 | AT4G37175 | Activation |
| AT5G61850 | AT4G37180 | Activation |
| AT5G61850 | AT4G37610 | Activation |
| AT5G61850 | AT4G37620 | Activation |
| AT5G61850 | AT4G37640 | Activation |
| AT5G61850 | AT4G37750 | Activation |
| AT5G61850 | AT4G37760 | Activation |
| AT5G61850 | AT4G37770 | Activation |
| AT5G61850 | AT4G37780 | Activation |
| AT5G61850 | AT4G37810 | Activation |
| AT5G61850 | AT4G37820 | Activation |
| AT5G61850 | AT4G38150 | Activation |
| AT5G61850 | AT4G38160 | Activation |
| AT5G61850 | AT4G38170 | Activation |
| AT5G61850 | AT4G38740 | Activation |
| AT5G61850 | AT4G38750 | Activation |
| AT5G61850 | AT4G38810 | Activation |
| AT5G61850 | AT4G38825 | Activation |
| AT5G61850 | AT4G38900 | Activation |
| AT5G61850 | AT4G38910 | Activation |
| AT5G61850 | AT4G39040 | Activation |



|           |           |            |
|-----------|-----------|------------|
| AT5G61850 | AT4G39050 | Activation |
| AT5G61850 | AT4G39160 | Activation |
| AT5G61850 | AT4G39170 | Activation |
| AT5G61850 | AT4G39270 | Activation |
| AT5G61850 | AT4G39280 | Activation |
| AT5G61850 | AT4G39380 | Activation |
| AT5G61850 | AT4G39390 | Activation |
| AT5G61850 | AT4G39400 | Activation |
| AT5G61850 | AT4G39470 | Activation |
| AT5G61850 | AT4G39480 | Activation |
| AT5G61850 | AT4G39490 | Activation |
| AT5G61850 | AT4G39720 | Activation |
| AT5G61850 | AT4G39730 | Activation |
| AT5G61850 | AT4G39740 | Activation |
| AT5G61850 | AT4G40030 | Activation |
| AT5G61850 | AT4G40040 | Activation |
| AT5G61850 | AT4G40050 | Activation |
| AT5G61850 | AT5G01010 | Activation |
| AT5G61850 | AT5G01015 | Activation |
| AT5G61850 | AT5G01030 | Activation |
| AT5G61850 | AT5G01040 | Activation |
| AT5G61850 | AT5G01090 | Activation |
| AT5G61850 | AT5G01100 | Activation |
| AT5G61850 | AT5G01110 | Activation |
| AT5G61850 | AT5G01510 | Activation |
| AT5G61850 | AT5G01520 | Activation |
| AT5G61850 | AT5G01530 | Activation |
| AT5G61850 | AT5G01540 | Activation |
| AT5G61850 | AT5G01550 | Activation |
| AT5G61850 | AT5G01730 | Activation |
| AT5G61850 | AT5G01734 | Activation |
| AT5G61850 | AT5G01830 | Activation |
| AT5G61850 | AT5G01840 | Activation |
| AT5G61850 | AT5G01950 | Activation |
| AT5G61850 | AT5G01960 | Activation |
| AT5G61850 | AT5G02040 | Activation |
| AT5G61850 | AT5G02050 | Activation |
| AT5G61850 | AT5G02130 | Activation |
| AT5G61850 | AT5G02140 | Activation |
| AT5G61850 | AT5G02160 | Activation |
| AT5G61850 | AT5G02330 | Activation |
| AT5G61850 | AT5G02340 | Activation |
| AT5G61850 | AT5G02410 | Activation |
| AT5G61850 | AT5G02420 | Activation |
| AT5G61850 | AT5G02430 | Activation |
| AT5G61850 | AT5G02450 | Activation |
| AT5G61850 | AT5G02460 | Activation |
| AT5G61850 | AT5G02530 | Activation |
| AT5G61850 | AT5G02540 | Activation |
| AT5G61850 | AT5G02811 | Activation |
| AT5G61850 | AT5G02815 | Activation |
| AT5G61850 | AT5G02960 | Activation |

|           |           |            |
|-----------|-----------|------------|
| AT5G61850 | AT5G02970 | Activation |
| AT5G61850 | AT5G03040 | Activation |
| AT5G61850 | AT5G03050 | Activation |
| AT5G61850 | AT5G03210 | Activation |
| AT5G61850 | AT5G03220 | Activation |
| AT5G61850 | AT5G03380 | Activation |
| AT5G61850 | AT5G03390 | Activation |
| AT5G61850 | AT5G03530 | Activation |
| AT5G61850 | AT5G03540 | Activation |
| AT5G61850 | AT5G03660 | Activation |
| AT5G61850 | AT5G03690 | Activation |
| AT5G61850 | AT5G03700 | Activation |
| AT5G61850 | AT5G03705 | Activation |
| AT5G61850 | AT5G03710 | Activation |
| AT5G61850 | AT5G03830 | Activation |
| AT5G61850 | AT5G03840 | Activation |
| AT5G61850 | AT5G04190 | Activation |
| AT5G61850 | AT5G04200 | Activation |
| AT5G61850 | AT5G04220 | Activation |
| AT5G61850 | AT5G04230 | Activation |
| AT5G61850 | AT5G04235 | Activation |
| AT5G61850 | AT5G04238 | Activation |
| AT5G61850 | AT5G04260 | Activation |
| AT5G61850 | AT5G04267 | Activation |
| AT5G61850 | AT5G04470 | Activation |
| AT5G61850 | AT5G04480 | Activation |
| AT5G61850 | AT5G04680 | Activation |
| AT5G61850 | AT5G04690 | Activation |
| AT5G61850 | AT5G04700 | Activation |
| AT5G61850 | AT5G04770 | Activation |
| AT5G61850 | AT5G04780 | Activation |
| AT5G61850 | AT5G05090 | Activation |
| AT5G61850 | AT5G05100 | Activation |
| AT5G61850 | AT5G05110 | Activation |
| AT5G61850 | AT5G05113 | Activation |
| AT5G61850 | AT5G05170 | Activation |
| AT5G61850 | AT5G05180 | Activation |
| AT5G61850 | AT5G05282 | Activation |
| AT5G61850 | AT5G05290 | Activation |
| AT5G61850 | AT5G05435 | Activation |
| AT5G61850 | AT5G05440 | Activation |
| AT5G61850 | AT5G05450 | Activation |
| AT5G61850 | AT5G05810 | Activation |
| AT5G61850 | AT5G05820 | Activation |
| AT5G61850 | AT5G05965 | Activation |
| AT5G61850 | AT5G05970 | Activation |
| AT5G61850 | AT5G06340 | Activation |
| AT5G61850 | AT5G06350 | Activation |
| AT5G61850 | AT5G06700 | Activation |
| AT5G61850 | AT5G06710 | Activation |
| AT5G61850 | AT5G06850 | Activation |
| AT5G61850 | AT5G06860 | Activation |

|           |           |            |
|-----------|-----------|------------|
| AT5G61850 | AT5G06865 | Activation |
| AT5G61850 | AT5G07280 | Activation |
| AT5G61850 | AT5G07290 | Activation |
| AT5G61850 | AT5G07430 | Activation |
| AT5G61850 | AT5G07440 | Activation |
| AT5G61850 | AT5G07675 | Activation |
| AT5G61850 | AT5G07680 | Activation |
| AT5G61850 | AT5G07760 | Activation |
| AT5G61850 | AT5G07980 | Activation |
| AT5G61850 | AT5G07990 | Activation |
| AT5G61850 | AT5G08185 | Activation |
| AT5G61850 | AT5G08190 | Activation |
| AT5G61850 | AT5G08330 | Activation |
| AT5G61850 | AT5G08335 | Activation |
| AT5G61850 | AT5G08340 | Activation |
| AT5G61850 | AT5G08350 | Activation |
| AT5G61850 | AT5G08450 | Activation |
| AT5G61850 | AT5G08460 | Activation |
| AT5G61850 | AT5G08740 | Activation |
| AT5G61850 | AT5G08750 | Activation |
| AT5G61850 | AT5G09450 | Activation |
| AT5G61850 | AT5G09460 | Activation |
| AT5G61850 | AT5G09470 | Activation |
| AT5G61850 | AT5G09480 | Activation |
| AT5G61850 | AT5G09620 | Activation |
| AT5G61850 | AT5G09630 | Activation |
| AT5G61850 | AT5G09805 | Activation |
| AT5G61850 | AT5G09810 | Activation |
| AT5G61850 | AT5G10010 | Activation |
| AT5G61850 | AT5G10020 | Activation |
| AT5G61850 | AT5G10180 | Activation |
| AT5G61850 | AT5G10190 | Activation |
| AT5G61850 | AT5G10310 | Activation |
| AT5G61850 | AT5G10320 | Activation |
| AT5G61850 | AT5G10510 | Activation |
| AT5G61850 | AT5G10760 | Activation |
| AT5G61850 | AT5G10770 | Activation |
| AT5G61850 | AT5G10860 | Activation |
| AT5G61850 | AT5G10870 | Activation |
| AT5G61850 | AT5G10880 | Activation |
| AT5G61850 | AT5G10980 | Activation |
| AT5G61850 | AT5G10990 | Activation |
| AT5G61850 | AT5G11000 | Activation |
| AT5G61850 | AT5G11040 | Activation |
| AT5G61850 | AT5G11050 | Activation |
| AT5G61850 | AT5G11180 | Activation |
| AT5G61850 | AT5G11190 | Activation |
| AT5G61850 | AT5G11310 | Activation |
| AT5G61850 | AT5G11320 | Activation |
| AT5G61850 | AT5G11325 | Activation |
| AT5G61850 | AT5G11330 | Activation |
| AT5G61850 | AT5G11416 | Activation |

|           |           |            |
|-----------|-----------|------------|
| AT5G61850 | AT5G11420 | Activation |
| AT5G61850 | AT5G11425 | Activation |
| AT5G61850 | AT5G11670 | Activation |
| AT5G61850 | AT5G11680 | Activation |
| AT5G61850 | AT5G11690 | Activation |
| AT5G61850 | AT5G11730 | Activation |
| AT5G61850 | AT5G11740 | Activation |
| AT5G61850 | AT5G11750 | Activation |
| AT5G61850 | AT5G11780 | Activation |
| AT5G61850 | AT5G11790 | Activation |
| AT5G61850 | AT5G11880 | Activation |
| AT5G61850 | AT5G11890 | Activation |
| AT5G61850 | AT5G11900 | Activation |
| AT5G61850 | AT5G11920 | Activation |
| AT5G61850 | AT5G11930 | Activation |
| AT5G61850 | AT5G12010 | Activation |
| AT5G61850 | AT5G12020 | Activation |
| AT5G61850 | AT5G12080 | Activation |
| AT5G61850 | AT5G12085 | Activation |
| AT5G61850 | AT5G12120 | Activation |
| AT5G61850 | AT5G12130 | Activation |
| AT5G61850 | AT5G12250 | Activation |
| AT5G61850 | AT5G12260 | Activation |
| AT5G61850 | AT5G12430 | Activation |
| AT5G61850 | AT5G12440 | Activation |
| AT5G61850 | AT5G12900 | Activation |
| AT5G61850 | AT5G12910 | Activation |
| AT5G61850 | AT5G13110 | Activation |
| AT5G61850 | AT5G13120 | Activation |
| AT5G61850 | AT5G13160 | Activation |
| AT5G61850 | AT5G13170 | Activation |
| AT5G61850 | AT5G13190 | Activation |
| AT5G61850 | AT5G13290 | Activation |
| AT5G61850 | AT5G13300 | Activation |
| AT5G61850 | AT5G13430 | Activation |
| AT5G61850 | AT5G13440 | Activation |
| AT5G61850 | AT5G13450 | Activation |
| AT5G61850 | AT5G13630 | Activation |
| AT5G61850 | AT5G13640 | Activation |
| AT5G61850 | AT5G13830 | Activation |
| AT5G61850 | AT5G13840 | Activation |
| AT5G61850 | AT5G13845 | Activation |
| AT5G61850 | AT5G14180 | Activation |
| AT5G61850 | AT5G14200 | Activation |
| AT5G61850 | AT5G14210 | Activation |
| AT5G61850 | AT5G14220 | Activation |
| AT5G61850 | AT5G14260 | Activation |
| AT5G61850 | AT5G14270 | Activation |
| AT5G61850 | AT5G14280 | Activation |
| AT5G61850 | AT5G14290 | Activation |
| AT5G61850 | AT5G14300 | Activation |
| AT5G61850 | AT5G14330 | Activation |

|           |           |            |
|-----------|-----------|------------|
| AT5G61850 | AT5G14340 | Activation |
| AT5G61850 | AT5G14750 | Activation |
| AT5G61850 | AT5G14760 | Activation |
| AT5G61850 | AT5G15060 | Activation |
| AT5G61850 | AT5G15070 | Activation |
| AT5G61850 | AT5G15140 | Activation |
| AT5G61850 | AT5G15150 | Activation |
| AT5G61850 | AT5G15160 | Activation |
| AT5G61850 | AT5G15170 | Activation |
| AT5G61850 | AT5G15175 | Activation |
| AT5G61850 | AT5G15220 | Activation |
| AT5G61850 | AT5G15230 | Activation |
| AT5G61850 | AT5G15320 | Activation |
| AT5G61850 | AT5G15330 | Activation |
| AT5G61850 | AT5G15400 | Activation |
| AT5G61850 | AT5G15410 | Activation |
| AT5G61850 | AT5G15420 | Activation |
| AT5G61850 | AT5G16023 | Activation |
| AT5G61850 | AT5G16030 | Activation |
| AT5G61850 | AT5G16560 | Activation |
| AT5G61850 | AT5G16567 | Activation |
| AT5G61850 | AT5G16570 | Activation |
| AT5G61850 | AT5G17070 | Activation |
| AT5G61850 | AT5G17073 | Activation |
| AT5G61850 | AT5G17080 | Activation |
| AT5G61850 | AT5G17710 | Activation |
| AT5G61850 | AT5G17790 | Activation |
| AT5G61850 | AT5G17795 | Activation |
| AT5G61850 | AT5G17800 | Activation |
| AT5G61850 | AT5G17850 | Activation |
| AT5G61850 | AT5G17860 | Activation |
| AT5G61850 | AT5G17980 | Activation |
| AT5G61850 | AT5G17990 | Activation |
| AT5G61850 | AT5G18570 | Activation |
| AT5G61850 | AT5G18661 | Activation |
| AT5G61850 | AT5G18670 | Activation |
| AT5G61850 | AT5G18680 | Activation |
| AT5G61850 | AT5G18690 | Activation |
| AT5G61850 | AT5G18820 | Activation |
| AT5G61850 | AT5G18830 | Activation |
| AT5G61850 | AT5G19030 | Activation |
| AT5G61850 | AT5G19040 | Activation |
| AT5G61850 | AT5G19090 | Activation |
| AT5G61850 | AT5G19175 | Activation |
| AT5G61850 | AT5G19180 | Activation |
| AT5G61850 | AT5G19550 | Activation |
| AT5G61850 | AT5G19560 | Activation |
| AT5G61850 | AT5G19710 | Activation |
| AT5G61850 | AT5G19720 | Activation |
| AT5G61850 | AT5G19729 | Activation |
| AT5G61850 | AT5G19930 | Activation |
| AT5G61850 | AT5G19940 | Activation |

|           |           |            |
|-----------|-----------|------------|
| AT5G61850 | AT5G19950 | Activation |
| AT5G61850 | AT5G20070 | Activation |
| AT5G61850 | AT5G20080 | Activation |
| AT5G61850 | AT5G20140 | Activation |
| AT5G61850 | AT5G20150 | Activation |
| AT5G61850 | AT5G20181 | Activation |
| AT5G61850 | AT5G20190 | Activation |
| AT5G61850 | AT5G20510 | Activation |
| AT5G61850 | AT5G20520 | Activation |
| AT5G61850 | AT5G20635 | Activation |
| AT5G61850 | AT5G20640 | Activation |
| AT5G61850 | AT5G20830 | Activation |
| AT5G61850 | AT5G20840 | Activation |
| AT5G61850 | AT5G21060 | Activation |
| AT5G61850 | AT5G21070 | Activation |
| AT5G61850 | AT5G21105 | Activation |
| AT5G61850 | AT5G21110 | Activation |
| AT5G61850 | AT5G21120 | Activation |
| AT5G61850 | AT5G21160 | Activation |
| AT5G61850 | AT5G21170 | Activation |
| AT5G61850 | AT5G21950 | Activation |
| AT5G61850 | AT5G21960 | Activation |
| AT5G61850 | AT5G22080 | Activation |
| AT5G61850 | AT5G22090 | Activation |
| AT5G61850 | AT5G22280 | Activation |
| AT5G61850 | AT5G22290 | Activation |
| AT5G61850 | AT5G22300 | Activation |
| AT5G61850 | AT5G22355 | Activation |
| AT5G61850 | AT5G22360 | Activation |
| AT5G61850 | AT5G22370 | Activation |
| AT5G61850 | AT5G22390 | Activation |
| AT5G61850 | AT5G22400 | Activation |
| AT5G61850 | AT5G22630 | Activation |
| AT5G61850 | AT5G22640 | Activation |
| AT5G61850 | AT5G22740 | Activation |
| AT5G61850 | AT5G22990 | Activation |
| AT5G61850 | AT5G23000 | Activation |
| AT5G61850 | AT5G23010 | Activation |
| AT5G61850 | AT5G23090 | Activation |
| AT5G61850 | AT5G23100 | Activation |
| AT5G61850 | AT5G23210 | Activation |
| AT5G61850 | AT5G23280 | Activation |
| AT5G61850 | AT5G23290 | Activation |
| AT5G61850 | AT5G24120 | Activation |
| AT5G61850 | AT5G24130 | Activation |
| AT5G61850 | AT5G24355 | Activation |
| AT5G61850 | AT5G24360 | Activation |
| AT5G61850 | AT5G24910 | Activation |
| AT5G61850 | AT5G24915 | Activation |
| AT5G61850 | AT5G24930 | Activation |
| AT5G61850 | AT5G25102 | Activation |
| AT5G61850 | AT5G25110 | Activation |

|           |           |            |
|-----------|-----------|------------|
| AT5G61850 | AT5G25120 | Activation |
| AT5G61850 | AT5G25190 | Activation |
| AT5G61850 | AT5G25240 | Activation |
| AT5G61850 | AT5G25250 | Activation |
| AT5G61850 | AT5G26360 | Activation |
| AT5G61850 | AT5G26570 | Activation |
| AT5G61850 | AT5G26840 | Activation |
| AT5G61850 | AT5G26848 | Activation |
| AT5G61850 | AT5G26850 | Activation |
| AT5G61850 | AT5G26910 | Activation |
| AT5G61850 | AT5G26912 | Activation |
| AT5G61850 | AT5G26980 | Activation |
| AT5G61850 | AT5G26990 | Activation |
| AT5G61850 | AT5G27895 | Activation |
| AT5G61850 | AT5G27900 | Activation |
| AT5G61850 | AT5G27920 | Activation |
| AT5G61850 | AT5G27925 | Activation |
| AT5G61850 | AT5G28490 | Activation |
| AT5G61850 | AT5G28491 | Activation |
| AT5G61850 | AT5G28510 | Activation |
| AT5G61850 | AT5G28637 | Activation |
| AT5G61850 | AT5G28640 | Activation |
| AT5G61850 | AT5G35407 | Activation |
| AT5G61850 | AT5G36210 | Activation |
| AT5G61850 | AT5G36220 | Activation |
| AT5G61850 | AT5G36223 | Activation |
| AT5G61850 | AT5G36860 | Activation |
| AT5G61850 | AT5G36870 | Activation |
| AT5G61850 | AT5G37680 | Activation |
| AT5G61850 | AT5G37690 | Activation |
| AT5G61850 | AT5G37790 | Activation |
| AT5G61850 | AT5G38100 | Activation |
| AT5G61850 | AT5G38290 | Activation |
| AT5G61850 | AT5G38300 | Activation |
| AT5G61850 | AT5G38410 | Activation |
| AT5G61850 | AT5G38420 | Activation |
| AT5G61850 | AT5G38510 | Activation |
| AT5G61850 | AT5G38520 | Activation |
| AT5G61850 | AT5G38530 | Activation |
| AT5G61850 | AT5G38540 | Activation |
| AT5G61850 | AT5G38880 | Activation |
| AT5G61850 | AT5G38890 | Activation |
| AT5G61850 | AT5G39040 | Activation |
| AT5G61850 | AT5G39050 | Activation |
| AT5G61850 | AT5G39060 | Activation |
| AT5G61850 | AT5G39581 | Activation |
| AT5G61850 | AT5G39590 | Activation |
| AT5G61850 | AT5G39600 | Activation |
| AT5G61850 | AT5G40800 | Activation |
| AT5G61850 | AT5G40810 | Activation |
| AT5G61850 | AT5G40890 | Activation |
| AT5G61850 | AT5G40910 | Activation |

|           |           |            |
|-----------|-----------|------------|
| AT5G61850 | AT5G41040 | Activation |
| AT5G61850 | AT5G41050 | Activation |
| AT5G61850 | AT5G41060 | Activation |
| AT5G61850 | AT5G41090 | Activation |
| AT5G61850 | AT5G41100 | Activation |
| AT5G61850 | AT5G41380 | Activation |
| AT5G61850 | AT5G41390 | Activation |
| AT5G61850 | AT5G41400 | Activation |
| AT5G61850 | AT5G41401 | Activation |
| AT5G61850 | AT5G42430 | Activation |
| AT5G61850 | AT5G42440 | Activation |
| AT5G61850 | AT5G42450 | Activation |
| AT5G61850 | AT5G42510 | Activation |
| AT5G61850 | AT5G42520 | Activation |
| AT5G61850 | AT5G42530 | Activation |
| AT5G61850 | AT5G42740 | Activation |
| AT5G61850 | AT5G42750 | Activation |
| AT5G61850 | AT5G42760 | Activation |
| AT5G61850 | AT5G42770 | Activation |
| AT5G61850 | AT5G42780 | Activation |
| AT5G61850 | AT5G43290 | Activation |
| AT5G61850 | AT5G43300 | Activation |
| AT5G61850 | AT5G43780 | Activation |
| AT5G61850 | AT5G43790 | Activation |
| AT5G61850 | AT5G43810 | Activation |
| AT5G61850 | AT5G43830 | Activation |
| AT5G61850 | AT5G43840 | Activation |
| AT5G61850 | AT5G43930 | Activation |
| AT5G61850 | AT5G43935 | Activation |
| AT5G61850 | AT5G43940 | Activation |
| AT5G61850 | AT5G43950 | Activation |
| AT5G61850 | AT5G43960 | Activation |
| AT5G61850 | AT5G44060 | Activation |
| AT5G61850 | AT5G44065 | Activation |
| AT5G61850 | AT5G44110 | Activation |
| AT5G61850 | AT5G44120 | Activation |
| AT5G61850 | AT5G44130 | Activation |
| AT5G61850 | AT5G44585 | Activation |
| AT5G61850 | AT5G44590 | Activation |
| AT5G61850 | AT5G44980 | Activation |
| AT5G61850 | AT5G44990 | Activation |
| AT5G61850 | AT5G45010 | Activation |
| AT5G61850 | AT5G45020 | Activation |
| AT5G61850 | AT5G45040 | Activation |
| AT5G61850 | AT5G45050 | Activation |
| AT5G61850 | AT5G45100 | Activation |
| AT5G61850 | AT5G45170 | Activation |
| AT5G61850 | AT5G45180 | Activation |
| AT5G61850 | AT5G45800 | Activation |
| AT5G61850 | AT5G45810 | Activation |
| AT5G61850 | AT5G45940 | Activation |
| AT5G61850 | AT5G45950 | Activation |



|           |           |            |
|-----------|-----------|------------|
| AT5G61850 | AT5G46380 | Activation |
| AT5G61850 | AT5G46390 | Activation |
| AT5G61850 | AT5G46400 | Activation |
| AT5G61850 | AT5G46680 | Activation |
| AT5G61850 | AT5G46690 | Activation |
| AT5G61850 | AT5G46760 | Activation |
| AT5G61850 | AT5G46770 | Activation |
| AT5G61850 | AT5G46780 | Activation |
| AT5G61850 | AT5G46910 | Activation |
| AT5G61850 | AT5G47220 | Activation |
| AT5G61850 | AT5G47225 | Activation |
| AT5G61850 | AT5G47229 | Activation |
| AT5G61850 | AT5G47230 | Activation |
| AT5G61850 | AT5G47240 | Activation |
| AT5G61850 | AT5G47380 | Activation |
| AT5G61850 | AT5G47390 | Activation |
| AT5G61850 | AT5G47500 | Activation |
| AT5G61850 | AT5G47510 | Activation |
| AT5G61850 | AT5G47550 | Activation |
| AT5G61850 | AT5G47560 | Activation |
| AT5G61850 | AT5G47635 | Activation |
| AT5G61850 | AT5G47640 | Activation |
| AT5G61850 | AT5G48160 | Activation |
| AT5G61850 | AT5G48170 | Activation |
| AT5G61850 | AT5G48175 | Activation |
| AT5G61850 | AT5G48180 | Activation |
| AT5G61850 | AT5G48850 | Activation |
| AT5G61850 | AT5G48860 | Activation |
| AT5G61850 | AT5G49280 | Activation |
| AT5G61850 | AT5G49290 | Activation |
| AT5G61850 | AT5G49330 | Activation |
| AT5G61850 | AT5G49334 | Activation |
| AT5G61850 | AT5G49510 | Activation |
| AT5G61850 | AT5G49520 | Activation |
| AT5G61850 | AT5G49700 | Activation |
| AT5G61850 | AT5G49710 | Activation |
| AT5G61850 | AT5G49760 | Activation |
| AT5G61850 | AT5G49890 | Activation |
| AT5G61850 | AT5G49900 | Activation |
| AT5G61850 | AT5G49970 | Activation |
| AT5G61850 | AT5G49980 | Activation |
| AT5G61850 | AT5G50870 | Activation |
| AT5G61850 | AT5G50880 | Activation |
| AT5G61850 | AT5G50920 | Activation |
| AT5G61850 | AT5G50930 | Activation |
| AT5G61850 | AT5G51105 | Activation |
| AT5G61850 | AT5G51110 | Activation |
| AT5G61850 | AT5G51120 | Activation |
| AT5G61850 | AT5G51650 | Activation |
| AT5G61850 | AT5G51660 | Activation |
| AT5G61850 | AT5G51820 | Activation |
| AT5G61850 | AT5G51830 | Activation |

|           |           |            |
|-----------|-----------|------------|
| AT5G61850 | AT5G51900 | Activation |
| AT5G61850 | AT5G51910 | Activation |
| AT5G61850 | AT5G51920 | Activation |
| AT5G61850 | AT5G51980 | Activation |
| AT5G61850 | AT5G51990 | Activation |
| AT5G61850 | AT5G52000 | Activation |
| AT5G61850 | AT5G52010 | Activation |
| AT5G61850 | AT5G52020 | Activation |
| AT5G61850 | AT5G52050 | Activation |
| AT5G61850 | AT5G52070 | Activation |
| AT5G61850 | AT5G52080 | Activation |
| AT5G61850 | AT5G52850 | Activation |
| AT5G61850 | AT5G52860 | Activation |
| AT5G61850 | AT5G53150 | Activation |
| AT5G61850 | AT5G53160 | Activation |
| AT5G61850 | AT5G53190 | Activation |
| AT5G61850 | AT5G53300 | Activation |
| AT5G61850 | AT5G53310 | Activation |
| AT5G61850 | AT5G53500 | Activation |
| AT5G61850 | AT5G53710 | Activation |
| AT5G61850 | AT5G53720 | Activation |
| AT5G61850 | AT5G54020 | Activation |
| AT5G61850 | AT5G54030 | Activation |
| AT5G61850 | AT5G54580 | Activation |
| AT5G61850 | AT5G54585 | Activation |
| AT5G61850 | AT5G54620 | Activation |
| AT5G61850 | AT5G54630 | Activation |
| AT5G61850 | AT5G54640 | Activation |
| AT5G61850 | AT5G54670 | Activation |
| AT5G61850 | AT5G54730 | Activation |
| AT5G61850 | AT5G54740 | Activation |
| AT5G61850 | AT5G55110 | Activation |
| AT5G61850 | AT5G55120 | Activation |
| AT5G61850 | AT5G56150 | Activation |
| AT5G61850 | AT5G56160 | Activation |
| AT5G61850 | AT5G56210 | Activation |
| AT5G61850 | AT5G56220 | Activation |
| AT5G61850 | AT5G56230 | Activation |
| AT5G61850 | AT5G56250 | Activation |
| AT5G61850 | AT5G56260 | Activation |
| AT5G61850 | AT5G56270 | Activation |
| AT5G61850 | AT5G56620 | Activation |
| AT5G61850 | AT5G56630 | Activation |
| AT5G61850 | AT5G56880 | Activation |
| AT5G61850 | AT5G56890 | Activation |
| AT5G61850 | AT5G57080 | Activation |
| AT5G61850 | AT5G57090 | Activation |
| AT5G61850 | AT5G57123 | Activation |
| AT5G61850 | AT5G57130 | Activation |
| AT5G61850 | AT5G57140 | Activation |
| AT5G61850 | AT5G57340 | Activation |
| AT5G61850 | AT5G57345 | Activation |

|           |           |            |
|-----------|-----------|------------|
| AT5G61850 | AT5G57540 | Activation |
| AT5G61850 | AT5G57550 | Activation |
| AT5G61850 | AT5G57567 | Activation |
| AT5G61850 | AT5G57570 | Activation |
| AT5G61850 | AT5G57580 | Activation |
| AT5G61850 | AT5G57590 | Activation |
| AT5G61850 | AT5G57660 | Activation |
| AT5G61850 | AT5G57670 | Activation |
| AT5G61850 | AT5G57870 | Activation |
| AT5G61850 | AT5G57880 | Activation |
| AT5G61850 | AT5G57910 | Activation |
| AT5G61850 | AT5G57920 | Activation |
| AT5G61850 | AT5G58070 | Activation |
| AT5G61850 | AT5G58080 | Activation |
| AT5G61850 | AT5G58090 | Activation |
| AT5G61850 | AT5G58100 | Activation |
| AT5G61850 | AT5G58550 | Activation |
| AT5G61850 | AT5G58560 | Activation |
| AT5G61850 | AT5G58580 | Activation |
| AT5G61850 | AT5G58590 | Activation |
| AT5G61850 | AT5G58870 | Activation |
| AT5G61850 | AT5G58880 | Activation |
| AT5G61850 | AT5G59060 | Activation |
| AT5G61850 | AT5G59070 | Activation |
| AT5G61850 | AT5G59080 | Activation |
| AT5G61850 | AT5G59140 | Activation |
| AT5G61850 | AT5G59150 | Activation |
| AT5G61850 | AT5G59160 | Activation |
| AT5G61850 | AT5G59210 | Activation |
| AT5G61850 | AT5G59220 | Activation |
| AT5G61850 | AT5G59420 | Activation |
| AT5G61850 | AT5G59430 | Activation |
| AT5G61850 | AT5G59505 | Activation |
| AT5G61850 | AT5G59510 | Activation |
| AT5G61850 | AT5G59662 | Activation |
| AT5G61850 | AT5G59670 | Activation |
| AT5G61850 | AT5G59680 | Activation |
| AT5G61850 | AT5G59700 | Activation |
| AT5G61850 | AT5G59710 | Activation |
| AT5G61850 | AT5G59780 | Activation |
| AT5G61850 | AT5G59790 | Activation |
| AT5G61850 | AT5G60150 | Activation |
| AT5G61850 | AT5G60160 | Activation |
| AT5G61850 | AT5G60260 | Activation |
| AT5G61850 | AT5G60270 | Activation |
| AT5G61850 | AT5G60640 | Activation |
| AT5G61850 | AT5G60680 | Activation |
| AT5G61850 | AT5G60840 | Activation |
| AT5G61850 | AT5G60850 | Activation |
| AT5G61850 | AT5G60860 | Activation |
| AT5G61850 | AT5G61270 | Activation |
| AT5G61850 | AT5G61280 | Activation |

|           |           |            |
|-----------|-----------|------------|
| AT5G61850 | AT5G61370 | Activation |
| AT5G61850 | AT5G61380 | Activation |
| AT5G61850 | AT5G61420 | Activation |
| AT5G61850 | AT5G61850 | Activation |
| AT5G61850 | AT5G61865 | Activation |
| AT5G61850 | AT5G61960 | Activation |
| AT5G61850 | AT5G61970 | Activation |
| AT5G61850 | AT5G61990 | Activation |
| AT5G61850 | AT5G61997 | Activation |
| AT5G61850 | AT5G62090 | Activation |
| AT5G61850 | AT5G62100 | Activation |
| AT5G61850 | AT5G62140 | Activation |
| AT5G61850 | AT5G62150 | Activation |
| AT5G61850 | AT5G62170 | Activation |
| AT5G61850 | AT5G62230 | Activation |
| AT5G61850 | AT5G62270 | Activation |
| AT5G61850 | AT5G62280 | Activation |
| AT5G61850 | AT5G62420 | Activation |
| AT5G61850 | AT5G62430 | Activation |
| AT5G61850 | AT5G62460 | Activation |
| AT5G61850 | AT5G62470 | Activation |
| AT5G61850 | AT5G62530 | Activation |
| AT5G61850 | AT5G62540 | Activation |
| AT5G61850 | AT5G62660 | Activation |
| AT5G61850 | AT5G62670 | Activation |
| AT5G61850 | AT5G62680 | Activation |
| AT5G61850 | AT5G62710 | Activation |
| AT5G61850 | AT5G62720 | Activation |
| AT5G61850 | AT5G62860 | Activation |
| AT5G61850 | AT5G62880 | Activation |
| AT5G61850 | AT5G62950 | Activation |
| AT5G61850 | AT5G62960 | Activation |
| AT5G61850 | AT5G63120 | Activation |
| AT5G61850 | AT5G63130 | Activation |
| AT5G61850 | AT5G63145 | Activation |
| AT5G61850 | AT5G63150 | Activation |
| AT5G61850 | AT5G63410 | Activation |
| AT5G61850 | AT5G63420 | Activation |
| AT5G61850 | AT5G63460 | Activation |
| AT5G61850 | AT5G63470 | Activation |
| AT5G61850 | AT5G63480 | Activation |
| AT5G61850 | AT5G63490 | Activation |
| AT5G61850 | AT5G63500 | Activation |
| AT5G61850 | AT5G63610 | Activation |
| AT5G61850 | AT5G63620 | Activation |
| AT5G61850 | AT5G63750 | Activation |
| AT5G61850 | AT5G63760 | Activation |
| AT5G61850 | AT5G63870 | Activation |
| AT5G61850 | AT5G63880 | Activation |
| AT5G61850 | AT5G64110 | Activation |
| AT5G61850 | AT5G64120 | Activation |
| AT5G61850 | AT5G64260 | Activation |

|           |           |            |
|-----------|-----------|------------|
| AT5G61850 | AT5G64270 | Activation |
| AT5G61850 | AT5G64330 | Activation |
| AT5G61850 | AT5G64340 | Activation |
| AT5G61850 | AT5G64350 | Activation |
| AT5G61850 | AT5G64740 | Activation |
| AT5G61850 | AT5G64855 | Activation |
| AT5G61850 | AT5G64860 | Activation |
| AT5G61850 | AT5G64905 | Activation |
| AT5G61850 | AT5G64910 | Activation |
| AT5G61850 | AT5G65040 | Activation |
| AT5G61850 | AT5G65050 | Activation |
| AT5G61850 | AT5G65060 | Activation |
| AT5G61850 | AT5G65070 | Activation |
| AT5G61850 | AT5G65305 | Activation |
| AT5G61850 | AT5G65410 | Activation |
| AT5G61850 | AT5G65420 | Activation |
| AT5G61850 | AT5G65460 | Activation |
| AT5G61850 | AT5G65470 | Activation |
| AT5G61850 | AT5G65590 | Activation |
| AT5G61850 | AT5G65600 | Activation |
| AT5G61850 | AT5G65710 | Activation |
| AT5G61850 | AT5G65720 | Activation |
| AT5G61850 | AT5G65730 | Activation |
| AT5G61850 | AT5G65740 | Activation |
| AT5G61850 | AT5G66310 | Activation |
| AT5G61850 | AT5G66330 | Activation |
| AT5G61850 | AT5G66340 | Activation |
| AT5G61850 | AT5G66440 | Activation |
| AT5G61850 | AT5G66450 | Activation |
| AT5G61850 | AT5G66540 | Activation |
| AT5G61850 | AT5G66550 | Activation |
| AT5G61850 | AT5G66570 | Activation |
| AT5G61850 | AT5G66580 | Activation |
| AT5G61850 | AT5G66590 | Activation |
| AT5G61850 | AT5G66650 | Activation |
| AT5G61850 | AT5G66658 | Activation |
| AT5G61850 | AT5G66690 | Activation |
| AT5G61850 | AT5G66700 | Activation |
| AT5G61850 | AT5G66730 | Activation |
| AT5G61850 | AT5G66740 | Activation |
| AT5G61850 | AT5G66750 | Activation |
| AT5G61850 | AT5G66780 | Activation |
| AT5G61850 | AT5G66790 | Activation |
| AT5G61850 | AT5G66840 | Activation |
| AT5G61850 | AT5G66850 | Activation |
| AT5G61850 | AT5G66860 | Activation |
| AT5G61850 | AT5G66940 | Activation |
| AT5G61850 | AT5G66950 | Activation |
| AT5G61850 | AT5G67060 | Activation |
| AT5G61850 | AT5G67140 | Activation |
| AT5G61850 | AT5G67150 | Activation |
| AT5G61850 | AT5G67260 | Activation |

|           |           |            |
|-----------|-----------|------------|
| AT5G61850 | AT5G67270 | Activation |
| AT5G61850 | AT5G67420 | Activation |
| AT5G61850 | AT5G67430 | Activation |
| AT3G22170 | AT2G36270 | Activation |
| AT3G22170 | AT2G37678 | Activation |
| AT3G22170 | AT5G02200 | Activation |
| AT3G22170 | AT2G40080 | Activation |
| AT4G15090 | AT2G36270 | Activation |
| AT4G15090 | AT2G40080 | Activation |
| AT5G11260 | AT2G40080 | Activation |
| AT5G35550 | AT3G26790 | Activation |
| AT4G01250 | AT5G01720 | Activation |
| AT4G01250 | AT4G24040 | Activation |
| AT4G01250 | AT3G10640 | Activation |
| AT4G01250 | AT1G10340 | Activation |
| AT4G01250 | AT1G19540 | Activation |
| AT4G01250 | AT3G02070 | Activation |
| AT4G01250 | AT3G11840 | Activation |
| AT4G01250 | AT5G44910 | Activation |
| AT4G01250 | AT4G26200 | Activation |
| AT4G01250 | AT3G23240 | Activation |
| AT4G01250 | AT2G38960 | Activation |
| AT1G32770 | AT5G12870 | Activation |
| AT1G32770 | AT1G66810 | Activation |
| AT5G12870 | AT5G44030 | Activation |
| AT5G12870 | AT5G17420 | Activation |
| AT5G12870 | AT4G18780 | Activation |
| AT5G12870 | AT1G66810 | Activation |
| AT4G31550 | AT5G44030 | Activation |
| AT4G17490 | AT5G44030 | Activation |
| AT1G51950 | AT5G44030 | Activation |
| AT1G54760 | AT5G44030 | Activation |
| AT1G60880 | AT5G44030 | Activation |
| AT1G77570 | AT5G44030 | Activation |
| AT2G01430 | AT5G44030 | Activation |
| AT3G46090 | AT5G17420 | Activation |
| AT4G26150 | AT5G44030 | Activation |
| AT5G07580 | AT5G44030 | Activation |
| AT5G26630 | AT5G44030 | Activation |
| AT5G12870 | AT4G34050 | Activation |
| AT5G12870 | AT4G38620 | Activation |
| AT5G12870 | AT1G17950 | Activation |
| AT5G12870 | AT1G73410 | Activation |
| AT5G12870 | AT1G79180 | Activation |
| AT5G12870 | AT2G16720 | Activation |
| AT5G12870 | AT5G16600 | Activation |
| AT2G46770 | AT3G08500 | Activation |
| AT3G61910 | AT3G49690 | Activation |
| AT1G32770 | AT3G08500 | Activation |
| AT5G62380 | AT3G08500 | Activation |
| AT1G71930 | AT3G08500 | Activation |
| AT5G62380 | AT4G35350 | Activation |

|           |           |            |
|-----------|-----------|------------|
| AT5G62380 | AT1G20850 | Activation |
| AT5G62380 | AT1G01900 | Activation |
| AT5G62380 | AT5G04200 | Activation |
| AT1G09540 | AT4G26220 | Activation |
| AT1G09540 | AT1G62990 | Activation |
| AT1G09540 | AT2G45220 | Activation |
| AT1G32770 | AT4G34990 | Activation |
| AT1G32770 | AT1G32770 | Activation |
| AT1G19350 | AT4G32410 | Activation |
| AT1G19350 | AT2G25540 | Activation |
| AT1G19350 | AT4G39350 | Activation |
| AT1G19350 | AT5G05170 | Activation |
| AT1G19350 | AT5G44030 | Activation |
| AT1G19350 | AT5G09870 | Activation |
| AT1G19350 | AT5G64740 | Activation |
| AT1G19350 | AT4G18780 | Activation |
| AT1G19350 | AT2G21770 | Activation |
| AT1G71930 | AT5G45970 | Activation |
| AT1G71930 | AT5G44030 | Activation |
| AT1G71930 | AT4G18780 | Activation |
| AT1G71930 | AT5G03170 | Activation |
| AT1G71930 | AT2G38080 | Activation |
| AT1G71930 | AT4G33330 | Activation |
| AT1G71930 | AT2G27440 | Activation |
| AT1G71930 | AT1G78430 | Activation |
| AT1G71930 | AT3G45010 | Activation |
| AT1G71930 | AT4G08160 | Activation |
| AT1G71930 | AT1G01900 | Activation |
| AT1G71930 | AT2G46770 | Activation |
| AT5G12870 | AT1G65060 | Activation |
| AT5G12870 | AT3G19450 | Activation |
| AT5G12870 | AT4G11310 | Activation |
| AT5G12870 | AT5G67230 | Activation |
| AT5G12870 | AT4G34990 | Activation |
| AT5G12870 | AT4G09460 | Activation |
| AT5G12870 | AT2G37040 | Activation |
| AT5G12870 | AT3G51300 | Activation |
| AT5G12870 | AT1G20090 | Activation |
| AT5G12870 | AT1G75840 | Activation |
| AT5G12870 | AT4G30810 | Activation |
| AT5G12870 | AT3G45010 | Activation |
| AT5G12870 | AT5G59290 | Activation |
| AT5G12870 | AT1G19700 | Activation |
| AT5G12870 | AT2G22850 | Activation |
| AT5G12870 | AT5G53200 | Activation |
| AT5G12870 | AT5G25890 | Activation |
| AT5G12870 | AT4G34610 | Activation |
| AT5G12870 | AT1G75410 | Activation |
| AT5G12870 | AT4G36870 | Activation |
| AT3G08500 | AT1G65060 | Activation |
| AT3G08500 | AT1G66810 | Activation |
| AT3G08500 | AT3G19450 | Activation |

|           |           |            |
|-----------|-----------|------------|
| AT3G08500 | AT4G34050 | Activation |
| AT3G08500 | AT5G67230 | Activation |
| AT3G08500 | AT1G62990 | Activation |
| AT3G08500 | AT4G34990 | Activation |
| AT3G08500 | AT4G38620 | Activation |
| AT3G08500 | AT1G17950 | Activation |
| AT3G08500 | AT1G73410 | Activation |
| AT3G08500 | AT1G16490 | Activation |
| AT3G08500 | AT4G09460 | Activation |
| AT3G08500 | AT1G79180 | Activation |
| AT3G08500 | AT2G16720 | Activation |
| AT3G08500 | AT2G37040 | Activation |
| AT3G08500 | AT3G10340 | Activation |
| AT3G08500 | AT3G51300 | Activation |
| AT3G08500 | AT1G20090 | Activation |
| AT3G08500 | AT1G75840 | Activation |
| AT3G08500 | AT5G59290 | Activation |
| AT3G08500 | AT1G19700 | Activation |
| AT3G08500 | AT2G22850 | Activation |
| AT3G08500 | AT5G53200 | Activation |
| AT3G08500 | AT5G25890 | Activation |
| AT3G08500 | AT4G34610 | Activation |
| AT3G08500 | AT1G75410 | Activation |
| AT3G08500 | AT4G36870 | Activation |
| AT2G46770 | AT1G62990 | Activation |
| AT2G46770 | AT1G63910 | Activation |
| AT2G46770 | AT5G12870 | Activation |
| AT2G46770 | AT1G28470 | Activation |
| AT3G61910 | AT1G62990 | Activation |
| AT3G61910 | AT1G63910 | Activation |
| AT3G61910 | AT5G12870 | Activation |
| AT3G61910 | AT1G28470 | Activation |
| AT1G32770 | AT1G62990 | Activation |
| AT1G32770 | AT1G63910 | Activation |
| AT1G32770 | AT1G66230 | Activation |
| AT1G32770 | AT4G12350 | Activation |
| AT1G32770 | AT5G16600 | Activation |
| AT1G32770 | AT1G17950 | Activation |
| AT1G32770 | AT1G73410 | Activation |
| AT1G32770 | AT4G33450 | Activation |
| AT1G32770 | AT4G28500 | Activation |
| AT1G32770 | AT1G28470 | Activation |
| AT5G62380 | AT1G62990 | Activation |
| AT5G62380 | AT1G63910 | Activation |
| AT5G62380 | AT5G12870 | Activation |
| AT5G62380 | AT1G28470 | Activation |
| AT1G71930 | AT1G62990 | Activation |
| AT1G71930 | AT1G63910 | Activation |
| AT1G71930 | AT5G12870 | Activation |
| AT1G71930 | AT1G28470 | Activation |
| AT1G32770 | AT2G14620 | Activation |
| AT1G32770 | AT5G64060 | Activation |



|           |           |            |
|-----------|-----------|------------|
| AT1G32770 | AT2G32610 | Activation |
| AT1G32770 | AT2G32620 | Activation |
| AT1G32770 | AT3G16920 | Activation |
| AT1G32770 | AT5G34940 | Activation |
| AT1G32770 | AT1G27440 | Activation |
| AT1G32770 | AT5G67230 | Activation |
| AT1G32770 | AT1G19300 | Activation |
| AT1G32770 | AT4G12910 | Activation |
| AT1G32770 | AT5G59290 | Activation |
| AT1G32770 | AT2G28760 | Activation |
| AT1G32770 | AT5G64530 | Activation |
| AT1G32770 | AT4G35350 | Activation |
| AT1G32770 | AT1G20850 | Activation |
| AT1G32770 | AT1G26820 | Activation |
| AT1G32770 | AT1G16420 | Activation |
| AT1G32770 | AT5G04200 | Activation |
| AT1G32770 | AT1G50010 | Activation |
| AT1G71930 | AT2G14620 | Activation |
| AT1G71930 | AT3G16920 | Activation |
| AT1G71930 | AT1G11190 | Activation |
| AT1G71930 | AT2G32610 | Activation |
| AT1G71930 | AT2G32620 | Activation |
| AT1G71930 | AT5G34940 | Activation |
| AT1G71930 | AT1G27440 | Activation |
| AT1G71930 | AT5G67230 | Activation |
| AT1G71930 | AT4G01680 | Activation |
| AT1G71930 | AT1G19300 | Activation |
| AT1G71930 | AT1G26820 | Activation |
| AT1G71930 | AT4G12910 | Activation |
| AT1G71930 | AT5G59290 | Activation |
| AT1G71930 | AT2G28760 | Activation |
| AT1G71930 | AT5G64530 | Activation |
| AT1G71930 | AT4G35350 | Activation |
| AT1G71930 | AT1G20850 | Activation |
| AT1G71930 | AT1G16420 | Activation |
| AT1G71930 | AT5G04200 | Activation |
| AT5G12870 | AT1G16490 | Activation |
| AT1G16490 | AT1G51680 | Activation |
| AT1G16490 | AT1G66810 | Activation |
| AT1G16490 | AT2G30490 | Activation |
| AT1G16490 | AT4G37970 | Activation |
| AT1G16490 | AT4G34050 | Activation |
| AT1G16490 | AT1G15950 | Activation |
| AT1G16490 | AT1G21100 | Activation |
| AT1G16490 | AT5G48930 | Activation |
| AT1G16490 | AT2G37040 | Activation |
| AT1G16490 | AT2G38080 | Activation |
| AT1G32770 | AT1G23460 | Activation |
| AT1G32770 | AT1G70500 | Activation |
| AT1G77570 | AT5G44030 | Activation |
| AT2G01430 | AT5G44030 | Activation |
| AT3G46090 | AT5G17420 | Activation |

|           |           |            |
|-----------|-----------|------------|
| AT4G26150 | AT5G44030 | Activation |
| AT5G07580 | AT5G44030 | Activation |
| AT5G26630 | AT5G44030 | Activation |
| AT5G12870 | AT1G62990 | Activation |
| AT5G12870 | AT2G28200 | Activation |
| AT1G71930 | AT2G34710 | Activation |
| AT3G23210 | AT5G04150 | Activation |
| AT4G14410 | AT5G04150 | Activation |
| AT2G22430 | AT1G74930 | Activation |
| AT1G74930 | AT5G57050 | Activation |
| AT1G74930 | AT4G37770 | Activation |
| AT1G74930 | AT1G74710 | Activation |
| AT1G74930 | AT5G03730 | Activation |
| AT1G74930 | AT2G44990 | Activation |
| AT1G74930 | AT4G32810 | Activation |
| AT1G74930 | AT3G14440 | Activation |
| AT1G74930 | AT1G78390 | Activation |
| AT1G74930 | AT5G05440 | Activation |
| AT1G74930 | AT4G01026 | Activation |
| AT1G74930 | AT4G18620 | Activation |
| AT2G43000 | AT1G14920 | Activation |
| AT2G43000 | AT1G66350 | Activation |
| AT5G04340 | AT4G23100 | Activation |
| AT5G08520 | AT3G14440 | Activation |
| AT5G08520 | AT4G27410 | Activation |
| AT5G08520 | AT1G52890 | Activation |
| AT2G38470 | AT4G04920 | Activation |
| AT3G20770 | AT4G32330 | Activation |
| AT4G04450 | AT5G43350 | Activation |
| AT1G09530 | AT2G46970 | Activation |
| AT1G09530 | AT1G02340 | Activation |
| AT1G09530 | AT5G02580 | Activation |
| AT1G09530 | AT2G42870 | Activation |
| AT5G66320 | AT1G71930 | Activation |
| AT5G25830 | AT1G71930 | Activation |
| AT5G60690 | AT1G71930 | Activation |
| AT2G40470 | AT1G71930 | Activation |
| AT2G45420 | AT1G71930 | Activation |
| AT4G00220 | AT1G71930 | Activation |
| AT4G28500 | AT1G71930 | Activation |
| AT4G29230 | AT1G71930 | Activation |
| AT5G64530 | AT1G71930 | Activation |
| AT2G18060 | AT1G71930 | Activation |
| AT4G36160 | AT1G71930 | Activation |
| AT5G66300 | AT1G71930 | Activation |
| AT1G12260 | AT1G71930 | Activation |
| AT1G62700 | AT1G71930 | Activation |
| AT5G62380 | AT1G71930 | Activation |
| AT1G71930 | AT1G71930 | Activation |
| AT1G74930 | AT4G26080 | Activation |
| AT1G09530 | AT3G15540 | Activation |
| AT1G09530 | AT4G28720 | Activation |

|           |           |            |
|-----------|-----------|------------|
| AT1G09530 | AT4G32280 | Activation |
| AT1G09530 | AT4G16780 | Activation |
| AT1G09530 | AT5G47370 | Activation |
| AT1G09530 | AT1G75450 | Activation |
| AT1G09530 | AT1G02400 | Activation |
| AT1G09530 | AT5G02200 | Activation |
| AT3G23210 | AT3G56970 | Activation |
| AT3G23210 | AT3G56980 | Activation |
| AT3G23210 | AT2G41240 | Activation |
| AT4G14410 | AT3G56970 | Activation |
| AT4G14410 | AT3G56980 | Activation |
| AT4G14410 | AT2G41240 | Activation |
| AT1G71930 | AT5G60690 | Activation |
| AT2G42200 | AT1G69120 | Activation |
| AT5G05410 | AT1G71930 | Activation |
| AT5G25190 | AT1G71930 | Activation |
| AT5G61600 | AT1G71930 | Activation |
| AT1G63650 | AT1G71930 | Activation |
| AT1G35460 | AT1G71930 | Activation |
| AT1G68810 | AT1G71930 | Activation |
| AT1G51140 | AT1G71930 | Activation |
| AT1G29950 | AT1G71930 | Activation |
| AT3G26744 | AT1G71930 | Activation |
| AT3G56980 | AT1G71930 | Activation |
| AT4G36540 | AT1G71930 | Activation |
| AT5G64340 | AT1G71930 | Activation |
| AT5G09460 | AT1G71930 | Activation |
| AT5G49450 | AT1G71930 | Activation |
| AT5G15830 | AT1G71930 | Activation |
| AT4G14540 | AT1G71930 | Activation |
| AT1G62990 | AT1G71930 | Activation |
| AT5G06710 | AT1G71930 | Activation |
| AT4G32880 | AT1G71930 | Activation |
| AT1G52150 | AT1G71930 | Activation |
| AT2G34710 | AT1G71930 | Activation |
| AT1G30490 | AT1G71930 | Activation |
| AT5G41410 | AT1G71930 | Activation |
| AT1G31320 | AT1G71930 | Activation |
| AT3G02310 | AT1G71930 | Activation |
| AT1G22640 | AT1G71930 | Activation |
| AT1G69580 | AT1G71930 | Activation |
| AT3G10760 | AT1G71930 | Activation |
| AT5G16600 | AT1G71930 | Activation |
| AT1G28470 | AT1G71930 | Activation |
| AT1G34190 | AT1G71930 | Activation |
| AT1G77450 | AT1G71930 | Activation |
| AT3G04420 | AT1G71930 | Activation |
| AT4G28530 | AT1G71930 | Activation |
| AT5G39610 | AT1G71930 | Activation |
| AT5G13180 | AT1G71930 | Activation |
| AT1G56170 | AT1G71930 | Activation |
| AT2G31070 | AT1G71930 | Activation |

|           |           |               |
|-----------|-----------|---------------|
| AT1G43640 | AT1G71930 | Activation    |
| AT2G30590 | AT1G71930 | Activation    |
| AT3G04670 | AT1G71930 | Activation    |
| AT2G46400 | AT1G71930 | Activation    |
| AT1G66140 | AT1G71930 | Activation    |
| AT5G03510 | AT1G71930 | Activation    |
| AT1G26800 | AT1G71930 | Activation    |
| AT1G72220 | AT1G71930 | Activation    |
| AT3G23060 | AT1G71930 | Activation    |
| AT5G08750 | AT1G71930 | Activation    |
| AT5G17600 | AT1G71930 | Activation    |
| AT5G55970 | AT1G71930 | Activation    |
| AT1G64620 | AT1G71930 | Activation    |
| AT5G60200 | AT1G71930 | Activation    |
| AT4G11070 | AT3G24650 | Activation    |
| AT5G04340 | AT5G27380 | Activation    |
| AT5G04340 | AT5G44070 | Activation    |
| AT5G04340 | AT1G03980 | Activation    |
| AT5G04340 | AT3G24170 | Activation    |
| AT5G04340 | AT1G59870 | Activation    |
| AT4G14410 | AT3G23210 | Co-regulators |
| AT1G69120 | AT5G61850 | PositiveLoop  |
| AT5G10140 | AT1G65480 | Repression    |
| AT5G11260 | AT1G27480 | Repression    |
| AT5G11260 | AT5G53370 | Repression    |
| AT5G11260 | AT1G03630 | Repression    |
| AT5G11260 | AT1G13600 | Repression    |
| AT5G11260 | AT2G41670 | Repression    |
| AT5G11260 | AT2G05160 | Repression    |
| AT5G11260 | AT2G40170 | Repression    |
| AT5G11260 | AT1G62780 | Repression    |
| AT5G11260 | AT4G32190 | Repression    |
| AT5G11260 | AT1G17460 | Repression    |
| AT5G11260 | AT2G46660 | Repression    |
| AT5G11260 | AT2G38750 | Repression    |
| AT5G11260 | AT5G59780 | Repression    |
| AT5G11260 | AT3G07650 | Repression    |
| AT5G11260 | AT5G55620 | Repression    |
| AT5G11260 | AT5G07680 | Repression    |
| AT5G11260 | AT4G01610 | Repression    |
| AT5G11260 | AT5G17760 | Repression    |
| AT5G11260 | AT4G15230 | Repression    |
| AT5G11260 | AT3G01350 | Repression    |
| AT5G11260 | AT1G15380 | Repression    |
| AT5G11260 | AT1G55550 | Repression    |
| AT5G11260 | AT1G78850 | Repression    |
| AT5G11260 | AT1G16850 | Repression    |
| AT5G11260 | AT1G78390 | Repression    |
| AT5G11260 | AT2G43050 | Repression    |
| AT5G11260 | AT4G34610 | Repression    |
| AT5G11260 | AT5G55220 | Repression    |
| AT5G11260 | AT3G16910 | Repression    |

|           |           |            |
|-----------|-----------|------------|
| AT5G11260 | AT5G59930 | Repression |
| AT5G11260 | AT2G43570 | Repression |
| AT5G11260 | AT3G21890 | Repression |
| AT5G11260 | AT3G42930 | Repression |
| AT5G11260 | AT1G24530 | Repression |
| AT5G11260 | AT1G17100 | Repression |
| AT5G11260 | AT1G32450 | Repression |
| AT5G11260 | AT5G45850 | Repression |
| AT5G11260 | AT1G10760 | Repression |
| AT5G11260 | AT3G03450 | Repression |
| AT5G11260 | AT1G72100 | Repression |
| AT5G11260 | AT4G35030 | Repression |
| AT5G11260 | AT3G02990 | Repression |
| AT5G11260 | AT3G15670 | Repression |
| AT5G11260 | AT3G21720 | Repression |
| AT5G11260 | AT5G44120 | Repression |
| AT5G11260 | AT2G35300 | Repression |
| AT5G11260 | AT1G80130 | Repression |
| AT5G11260 | AT2G41850 | Repression |
| AT5G11260 | AT1G69760 | Repression |
| AT5G11260 | AT5G62490 | Repression |
| AT5G11260 | AT2G29630 | Repression |
| AT5G11260 | AT2G28780 | Repression |
| AT5G11260 | AT1G63190 | Repression |
| AT5G11260 | AT2G31980 | Repression |
| AT5G11260 | AT2G33380 | Repression |
| AT5G11260 | AT4G37230 | Repression |
| AT5G11260 | AT5G24140 | Repression |
| AT5G11260 | AT3G04140 | Repression |
| AT5G11260 | AT4G36030 | Repression |
| AT5G11260 | AT2G25890 | Repression |
| AT5G11260 | AT5G01300 | Repression |
| AT5G11260 | AT2G15020 | Repression |
| AT5G11260 | AT4G37070 | Repression |
| AT5G11260 | AT3G06080 | Repression |
| AT5G11260 | AT2G27660 | Repression |
| AT5G11260 | AT2G43590 | Repression |
| AT2G41070 | AT3G51810 | Repression |
| AT3G54340 | AT1G69120 | Repression |
| AT5G20240 | AT1G69120 | Repression |
| AT2G25000 | AT4G04450 | Repression |
| AT2G25000 | AT2G25000 | Repression |
| AT1G79840 | AT4G11850 | Repression |
| AT1G32640 | AT1G29930 | Repression |
| AT1G32640 | AT1G67090 | Repression |
| AT4G18960 | AT2G17950 | Repression |
| AT2G46830 | AT5G61380 | Repression |
| AT1G01060 | AT5G61380 | Repression |
| AT1G75080 | AT3G50660 | Repression |
| AT1G75080 | AT5G05690 | Repression |
| AT4G23810 | AT1G62300 | Repression |
| AT4G23810 | AT4G04450 | Repression |

|           |           |            |
|-----------|-----------|------------|
| AT4G23810 | AT3G01080 | Repression |
| AT3G26790 | AT4G27160 | Repression |
| AT3G26790 | AT1G80340 | Repression |
| AT5G10140 | AT2G45660 | Repression |
| AT4G08150 | AT4G33870 | Repression |
| AT4G08150 | AT3G62000 | Repression |
| AT4G08150 | AT1G77530 | Repression |
| AT5G13790 | AT1G02400 | Repression |
| AT1G69120 | AT4G24540 | Repression |
| AT5G02030 | AT4G18960 | Repression |
| AT5G10140 | AT4G35900 | Repression |
| AT4G35390 | AT1G15550 | Repression |
| AT3G55560 | AT1G15550 | Repression |
| AT2G20180 | AT1G03850 | Repression |
| AT2G20180 | AT1G14720 | Repression |
| AT2G20180 | AT1G17840 | Repression |
| AT2G20180 | AT1G19180 | Repression |
| AT2G20180 | AT1G19450 | Repression |
| AT2G20180 | AT1G25550 | Repression |
| AT2G20180 | AT1G26270 | Repression |
| AT2G20180 | AT1G26770 | Repression |
| AT2G20180 | AT1G31240 | Repression |
| AT2G20180 | AT1G32920 | Repression |
| AT2G20180 | AT1G33240 | Repression |
| AT2G20180 | AT1G52890 | Repression |
| AT2G20180 | AT1G60190 | Repression |
| AT2G20180 | AT1G71100 | Repression |
| AT2G20180 | AT1G74940 | Repression |
| AT2G20180 | AT1G79150 | Repression |
| AT2G20180 | AT1G80440 | Repression |
| AT2G20180 | AT1G80530 | Repression |
| AT2G20180 | AT2G16660 | Repression |
| AT2G20180 | AT2G21520 | Repression |
| AT2G20180 | AT2G27500 | Repression |
| AT2G20180 | AT2G40610 | Repression |
| AT2G20180 | AT2G42770 | Repression |
| AT2G20180 | AT2G43500 | Repression |
| AT2G20180 | AT2G47000 | Repression |
| AT2G20180 | AT3G02050 | Repression |
| AT2G20180 | AT3G02550 | Repression |
| AT2G20180 | AT3G04730 | Repression |
| AT2G20180 | AT3G13320 | Repression |
| AT2G20180 | AT3G13960 | Repression |
| AT2G20180 | AT3G16000 | Repression |
| AT2G20180 | AT3G16150 | Repression |
| AT2G20180 | AT3G17830 | Repression |
| AT2G20180 | AT3G21090 | Repression |
| AT2G20180 | AT3G21540 | Repression |
| AT2G20180 | AT3G21560 | Repression |
| AT2G20180 | AT3G24050 | Repression |
| AT2G20180 | AT3G54000 | Repression |
| AT2G20180 | AT3G57520 | Repression |

|           |           |            |
|-----------|-----------|------------|
| AT2G20180 | AT3G57870 | Repression |
| AT2G20180 | AT3G62630 | Repression |
| AT2G20180 | AT4G11140 | Repression |
| AT2G20180 | AT4G17460 | Repression |
| AT2G20180 | AT4G22010 | Repression |
| AT2G20180 | AT4G23060 | Repression |
| AT2G20180 | AT4G23750 | Repression |
| AT2G20180 | AT4G36880 | Repression |
| AT2G20180 | AT5G03370 | Repression |
| AT2G20180 | AT5G05600 | Repression |
| AT2G20180 | AT5G10750 | Repression |
| AT2G20180 | AT5G11740 | Repression |
| AT2G20180 | AT5G22950 | Repression |
| AT2G20180 | AT5G42250 | Repression |
| AT2G20180 | AT5G51550 | Repression |
| AT2G20180 | AT5G53290 | Repression |
| AT2G20180 | AT5G54380 | Repression |
| AT2G20180 | AT5G60670 | Repression |
| AT2G20180 | AT5G65300 | Repression |
| AT2G20180 | AT5G65900 | Repression |
| AT2G20180 | AT5G67060 | Repression |
| AT2G20180 | AT5G67070 | Repression |
| AT1G24260 | AT4G24540 | Repression |
| AT1G24260 | AT2G45660 | Repression |
| AT1G24260 | AT2G22540 | Repression |
| AT1G24260 | AT2G03710 | Repression |
| AT5G13790 | AT1G07180 | Repression |
| AT5G13790 | AT1G07750 | Repression |
| AT5G13790 | AT1G28390 | Repression |
| AT5G13790 | AT1G31290 | Repression |
| AT5G13790 | AT1G35230 | Repression |
| AT5G13790 | AT1G54570 | Repression |
| AT5G13790 | AT1G71400 | Repression |
| AT5G13790 | AT1G80450 | Repression |
| AT5G13790 | AT2G04780 | Repression |
| AT5G13790 | AT2G32210 | Repression |
| AT5G13790 | AT2G37040 | Repression |
| AT5G13790 | AT2G39210 | Repression |
| AT5G13790 | AT2G41800 | Repression |
| AT5G13790 | AT2G43780 | Repression |
| AT5G13790 | AT3G01930 | Repression |
| AT5G13790 | AT3G07270 | Repression |
| AT5G13790 | AT3G15840 | Repression |
| AT5G13790 | AT4G15490 | Repression |
| AT5G13790 | AT4G21680 | Repression |
| AT5G13790 | AT4G22470 | Repression |
| AT5G13790 | AT4G37310 | Repression |
| AT5G13790 | AT4G37450 | Repression |
| AT5G13790 | AT4G38250 | Repression |
| AT5G13790 | AT5G01840 | Repression |
| AT5G13790 | AT5G05340 | Repression |
| AT5G13790 | AT5G19260 | Repression |

|           |           |            |
|-----------|-----------|------------|
| AT5G13790 | AT5G41400 | Repression |
| AT5G13790 | AT5G46050 | Repression |
| AT5G13790 | AT5G53870 | Repression |
| AT5G13790 | AT5G55930 | Repression |
| AT5G13790 | AT1G07090 | Repression |
| AT5G13790 | AT1G09750 | Repression |
| AT5G13790 | AT1G11700 | Repression |
| AT5G13790 | AT1G17620 | Repression |
| AT5G13790 | AT1G21670 | Repression |
| AT5G13790 | AT1G24530 | Repression |
| AT5G13790 | AT1G27480 | Repression |
| AT5G13790 | AT1G33250 | Repression |
| AT5G13790 | AT1G35350 | Repression |
| AT5G13790 | AT1G52690 | Repression |
| AT5G13790 | AT1G69870 | Repression |
| AT5G13790 | AT1G70230 | Repression |
| AT5G13790 | AT1G71880 | Repression |
| AT5G13790 | AT1G80530 | Repression |
| AT5G13790 | AT2G03020 | Repression |
| AT5G13790 | AT2G16660 | Repression |
| AT5G13790 | AT2G21060 | Repression |
| AT5G13790 | AT2G23130 | Repression |
| AT5G13790 | AT2G25620 | Repression |
| AT5G13790 | AT2G28120 | Repression |
| AT5G13790 | AT2G33050 | Repression |
| AT5G13790 | AT2G35860 | Repression |
| AT5G13790 | AT2G36830 | Repression |
| AT5G13790 | AT2G39010 | Repression |
| AT5G13790 | AT2G39710 | Repression |
| AT5G13790 | AT2G42610 | Repression |
| AT5G13790 | AT2G45830 | Repression |
| AT5G13790 | AT2G47560 | Repression |
| AT5G13790 | AT3G05180 | Repression |
| AT5G13790 | AT3G05360 | Repression |
| AT5G13790 | AT3G06470 | Repression |
| AT5G13790 | AT3G06810 | Repression |
| AT5G13790 | AT3G07390 | Repression |
| AT5G13790 | AT3G22120 | Repression |
| AT5G13790 | AT3G48690 | Repression |
| AT5G13790 | AT3G48700 | Repression |
| AT5G13790 | AT3G50340 | Repression |
| AT5G13790 | AT3G51860 | Repression |
| AT5G13790 | AT3G60690 | Repression |
| AT5G13790 | AT3G60900 | Repression |
| AT5G13790 | AT3G63160 | Repression |
| AT5G13790 | AT4G12310 | Repression |
| AT5G13790 | AT4G12730 | Repression |
| AT5G13790 | AT4G13340 | Repression |
| AT5G13790 | AT4G29140 | Repression |
| AT5G13790 | AT4G30430 | Repression |
| AT5G13790 | AT4G37320 | Repression |
| AT5G13790 | AT5G05600 | Repression |



|           |           |            |
|-----------|-----------|------------|
| AT5G13790 | AT5G06870 | Repression |
| AT5G13790 | AT5G07010 | Repression |
| AT5G13790 | AT5G11730 | Repression |
| AT5G13790 | AT5G13100 | Repression |
| AT5G13790 | AT5G14120 | Repression |
| AT5G13790 | AT5G16010 | Repression |
| AT5G13790 | AT5G16970 | Repression |
| AT5G13790 | AT5G19820 | Repression |
| AT5G13790 | AT5G21105 | Repression |
| AT5G13790 | AT5G40170 | Repression |
| AT5G13790 | AT5G45800 | Repression |
| AT5G13790 | AT5G46330 | Repression |
| AT5G13790 | AT5G48930 | Repression |
| AT5G13790 | AT5G61520 | Repression |
| AT5G13790 | AT5G65380 | Repression |
| AT5G13790 | AT3G57390 | Repression |
| AT5G13790 | AT2G33860 | Repression |
| AT5G13790 | AT5G39760 | Repression |
| AT5G13790 | AT4G25470 | Repression |
| AT5G13790 | AT2G42360 | Repression |
| AT5G13790 | AT3G60490 | Repression |
| AT5G13790 | AT1G77640 | Repression |
| AT5G13790 | AT1G52880 | Repression |
| AT5G13790 | AT5G50570 | Repression |
| AT1G14350 | AT1G13980 | Repression |
| AT1G14350 | AT3G54180 | Repression |
| AT2G02820 | AT1G13980 | Repression |
| AT2G02820 | AT3G54180 | Repression |
| AT4G36920 | AT1G02190 | Repression |
| AT4G36920 | AT1G04110 | Repression |
| AT4G36920 | AT1G07260 | Repression |
| AT4G36920 | AT1G09570 | Repression |
| AT4G36920 | AT1G12080 | Repression |
| AT4G36920 | AT1G14280 | Repression |
| AT4G36920 | AT1G15360 | Repression |
| AT4G36920 | AT1G19650 | Repression |
| AT4G36920 | AT1G22530 | Repression |
| AT4G36920 | AT1G23390 | Repression |
| AT4G36920 | AT1G51460 | Repression |
| AT4G36920 | AT1G53090 | Repression |
| AT4G36920 | AT1G53160 | Repression |
| AT4G36920 | AT1G60540 | Repression |
| AT4G36920 | AT1G61580 | Repression |
| AT4G36920 | AT1G64380 | Repression |
| AT4G36920 | AT1G68710 | Repression |
| AT4G36920 | AT1G69530 | Repression |
| AT4G36920 | AT1G71030 | Repression |
| AT4G36920 | AT1G71050 | Repression |
| AT4G36920 | AT1G75580 | Repression |
| AT4G36920 | AT1G75880 | Repression |
| AT4G36920 | AT1G78960 | Repression |
| AT4G36920 | AT1G80100 | Repression |

|           |           |            |
|-----------|-----------|------------|
| AT4G36920 | AT2G16760 | Repression |
| AT4G36920 | AT2G18470 | Repression |
| AT4G36920 | AT2G18550 | Repression |
| AT4G36920 | AT2G25150 | Repression |
| AT4G36920 | AT2G26520 | Repression |
| AT4G36920 | AT2G33380 | Repression |
| AT4G36920 | AT2G38060 | Repression |
| AT4G36920 | AT2G38110 | Repression |
| AT4G36920 | AT2G47260 | Repression |
| AT4G36920 | AT3G06750 | Repression |
| AT4G36920 | AT3G12610 | Repression |
| AT4G36920 | AT3G26090 | Repression |
| AT4G36920 | AT3G29575 | Repression |
| AT4G36920 | AT3G43960 | Repression |
| AT4G36920 | AT3G45140 | Repression |
| AT4G36920 | AT3G45780 | Repression |
| AT4G36920 | AT3G47680 | Repression |
| AT4G36920 | AT3G50270 | Repression |
| AT4G36920 | AT3G50700 | Repression |
| AT4G36920 | AT3G52480 | Repression |
| AT4G36920 | AT3G55560 | Repression |
| AT4G36920 | AT3G55710 | Repression |
| AT4G36920 | AT3G60690 | Repression |
| AT4G36920 | AT3G63460 | Repression |
| AT4G36920 | AT4G02540 | Repression |
| AT4G36920 | AT4G03400 | Repression |
| AT4G36920 | AT4G13210 | Repression |
| AT4G36920 | AT4G20260 | Repression |
| AT4G36920 | AT4G21870 | Repression |
| AT4G36920 | AT4G24050 | Repression |
| AT4G36920 | AT4G24510 | Repression |
| AT4G36920 | AT4G25170 | Repression |
| AT4G36920 | AT4G27240 | Repression |
| AT4G36920 | AT4G34410 | Repression |
| AT4G36920 | AT4G36870 | Repression |
| AT4G36920 | AT4G36920 | Repression |
| AT4G36920 | AT4G37540 | Repression |
| AT4G36920 | AT5G01600 | Repression |
| AT4G36920 | AT5G02890 | Repression |
| AT4G36920 | AT5G04020 | Repression |
| AT4G36920 | AT5G05860 | Repression |
| AT4G36920 | AT5G13400 | Repression |
| AT4G36920 | AT5G13790 | Repression |
| AT4G36920 | AT5G14550 | Repression |
| AT4G36920 | AT5G15310 | Repression |
| AT4G36920 | AT5G20250 | Repression |
| AT4G36920 | AT5G44680 | Repression |
| AT4G36920 | AT5G60400 | Repression |
| AT4G36920 | AT5G61590 | Repression |
| AT4G36920 | AT5G62360 | Repression |
| AT3G47640 | AT5G13740 | Repression |
| AT3G47640 | AT1G23020 | Repression |

|           |           |            |
|-----------|-----------|------------|
| AT3G47640 | AT1G56430 | Repression |
| AT2G43010 | AT1G01060 | Repression |
| AT2G43010 | AT1G01320 | Repression |
| AT2G43010 | AT1G01580 | Repression |
| AT2G43010 | AT1G03090 | Repression |
| AT2G43010 | AT1G03130 | Repression |
| AT2G43010 | AT1G03170 | Repression |
| AT2G43010 | AT1G03180 | Repression |
| AT2G43010 | AT1G03475 | Repression |
| AT2G43010 | AT1G03600 | Repression |
| AT2G43010 | AT1G03880 | Repression |
| AT2G43010 | AT1G05010 | Repression |
| AT2G43010 | AT1G05490 | Repression |
| AT2G43010 | AT1G05700 | Repression |
| AT2G43010 | AT1G05880 | Repression |
| AT2G43010 | AT1G06040 | Repression |
| AT2G43010 | AT1G06570 | Repression |
| AT2G43010 | AT1G07010 | Repression |
| AT2G43010 | AT1G07440 | Repression |
| AT2G43010 | AT1G08920 | Repression |
| AT2G43010 | AT1G09260 | Repression |
| AT2G43010 | AT1G09340 | Repression |
| AT2G43010 | AT1G09350 | Repression |
| AT2G43010 | AT1G10070 | Repression |
| AT2G43010 | AT1G10960 | Repression |
| AT2G43010 | AT1G11700 | Repression |
| AT2G43010 | AT1G12090 | Repression |
| AT2G43010 | AT1G12190 | Repression |
| AT2G43010 | AT1G12460 | Repression |
| AT2G43010 | AT1G12980 | Repression |
| AT2G43010 | AT1G13245 | Repression |
| AT2G43010 | AT1G13270 | Repression |
| AT2G43010 | AT1G14185 | Repression |
| AT2G43010 | AT1G14270 | Repression |
| AT2G43010 | AT1G14345 | Repression |
| AT2G43010 | AT1G14540 | Repression |
| AT2G43010 | AT1G14700 | Repression |
| AT2G43010 | AT1G14870 | Repression |
| AT2G43010 | AT1G15000 | Repression |
| AT2G43010 | AT1G15010 | Repression |
| AT2G43010 | AT1G15180 | Repression |
| AT2G43010 | AT1G15757 | Repression |
| AT2G43010 | AT1G15880 | Repression |
| AT2G43010 | AT1G17220 | Repression |
| AT2G43010 | AT1G17615 | Repression |
| AT2G43010 | AT1G18075 | Repression |
| AT2G43010 | AT1G18330 | Repression |
| AT2G43010 | AT1G18460 | Repression |
| AT2G43010 | AT1G18570 | Repression |
| AT2G43010 | AT1G18650 | Repression |
| AT2G43010 | AT1G18730 | Repression |
| AT2G43010 | AT1G19150 | Repression |

|           |           |            |
|-----------|-----------|------------|
| AT2G43010 | AT1G19397 | Repression |
| AT2G43010 | AT1G19670 | Repression |
| AT2G43010 | AT1G20340 | Repression |
| AT2G43010 | AT1G20515 | Repression |
| AT2G43010 | AT1G21060 | Repression |
| AT2G43010 | AT1G21130 | Repression |
| AT2G43010 | AT1G21990 | Repression |
| AT2G43010 | AT1G22630 | Repression |
| AT2G43010 | AT1G22650 | Repression |
| AT2G43010 | AT1G22880 | Repression |
| AT2G43010 | AT1G23020 | Repression |
| AT2G43010 | AT1G23090 | Repression |
| AT2G43010 | AT1G23100 | Repression |
| AT2G43010 | AT1G23390 | Repression |
| AT2G43010 | AT1G23480 | Repression |
| AT2G43010 | AT1G23490 | Repression |
| AT2G43010 | AT1G24000 | Repression |
| AT2G43010 | AT1G24260 | Repression |
| AT2G43010 | AT1G24530 | Repression |
| AT2G43010 | AT1G24540 | Repression |
| AT2G43010 | AT1G25275 | Repression |
| AT2G43010 | AT1G25440 | Repression |
| AT2G43010 | AT1G25510 | Repression |
| AT2G43010 | AT1G25550 | Repression |
| AT2G43010 | AT1G26150 | Repression |
| AT2G43010 | AT1G27050 | Repression |
| AT2G43010 | AT1G27180 | Repression |
| AT2G43010 | AT1G27280 | Repression |
| AT2G43010 | AT1G28310 | Repression |
| AT2G43010 | AT1G28335 | Repression |
| AT2G43010 | AT1G28570 | Repression |
| AT2G43010 | AT1G28580 | Repression |
| AT2G43010 | AT1G29660 | Repression |
| AT2G43010 | AT1G29940 | Repression |
| AT2G43010 | AT1G30490 | Repression |
| AT2G43010 | AT1G30560 | Repression |
| AT2G43010 | AT1G30680 | Repression |
| AT2G43010 | AT1G31814 | Repression |
| AT2G43010 | AT1G31835 | Repression |
| AT2G43010 | AT1G31840 | Repression |
| AT2G43010 | AT1G31880 | Repression |
| AT2G43010 | AT1G31920 | Repression |
| AT2G43010 | AT1G32060 | Repression |
| AT2G43010 | AT1G32190 | Repression |
| AT2G43010 | AT1G32200 | Repression |
| AT2G43010 | AT1G32540 | Repression |
| AT2G43010 | AT1G33590 | Repression |
| AT2G43010 | AT1G33760 | Repression |
| AT2G43010 | AT1G34580 | Repression |
| AT2G43010 | AT1G35617 | Repression |
| AT2G43010 | AT1G35830 | Repression |
| AT2G43010 | AT1G37130 | Repression |

|           |           |            |
|-----------|-----------|------------|
| AT2G43010 | AT1G42190 | Repression |
| AT2G43010 | AT1G42550 | Repression |
| AT2G43010 | AT1G44575 | Repression |
| AT2G43010 | AT1G45110 | Repression |
| AT2G43010 | AT1G48350 | Repression |
| AT2G43010 | AT1G49200 | Repression |
| AT2G43010 | AT1G49220 | Repression |
| AT2G43010 | AT1G49500 | Repression |
| AT2G43010 | AT1G50020 | Repression |
| AT2G43010 | AT1G50460 | Repression |
| AT2G43010 | AT1G51580 | Repression |
| AT2G43010 | AT1G51950 | Repression |
| AT2G43010 | AT1G52900 | Repression |
| AT2G43010 | AT1G53230 | Repression |
| AT2G43010 | AT1G53520 | Repression |
| AT2G43010 | AT1G55550 | Repression |
| AT2G43010 | AT1G55700 | Repression |
| AT2G43010 | AT1G56170 | Repression |
| AT2G43010 | AT1G58200 | Repression |
| AT2G43010 | AT1G59920 | Repression |
| AT2G43010 | AT1G60060 | Repression |
| AT2G43010 | AT1G61105 | Repression |
| AT2G43010 | AT1G61730 | Repression |
| AT2G43010 | AT1G63420 | Repression |
| AT2G43010 | AT1G63670 | Repression |
| AT2G43010 | AT1G64370 | Repression |
| AT2G43010 | AT1G64680 | Repression |
| AT2G43010 | AT1G64860 | Repression |
| AT2G43010 | AT1G67270 | Repression |
| AT2G43010 | AT1G67740 | Repression |
| AT2G43010 | AT1G68010 | Repression |
| AT2G43010 | AT1G68190 | Repression |
| AT2G43010 | AT1G68830 | Repression |
| AT2G43010 | AT1G68840 | Repression |
| AT2G43010 | AT1G69160 | Repression |
| AT2G43010 | AT1G69260 | Repression |
| AT2G43010 | AT1G69420 | Repression |
| AT2G43010 | AT1G69530 | Repression |
| AT2G43010 | AT1G69740 | Repression |
| AT2G43010 | AT1G70090 | Repression |
| AT2G43010 | AT1G70200 | Repression |
| AT2G43010 | AT1G70290 | Repression |
| AT2G43010 | AT1G70310 | Repression |
| AT2G43010 | AT1G70430 | Repression |
| AT2G43010 | AT1G70560 | Repression |
| AT2G43010 | AT1G70700 | Repression |
| AT2G43010 | AT1G71080 | Repression |
| AT2G43010 | AT1G71880 | Repression |
| AT2G43010 | AT1G72290 | Repression |
| AT2G43010 | AT1G72440 | Repression |
| AT2G43010 | AT1G72490 | Repression |
| AT2G43010 | AT1G72500 | Repression |

|           |           |            |
|-----------|-----------|------------|
| AT2G43010 | AT1G72520 | Repression |
| AT2G43010 | AT1G72610 | Repression |
| AT2G43010 | AT1G73060 | Repression |
| AT2G43010 | AT1G73066 | Repression |
| AT2G43010 | AT1G73600 | Repression |
| AT2G43010 | AT1G73660 | Repression |
| AT2G43010 | AT1G74500 | Repression |
| AT2G43010 | AT1G74670 | Repression |
| AT2G43010 | AT1G75430 | Repression |
| AT2G43010 | AT1G75460 | Repression |
| AT2G43010 | AT1G75580 | Repression |
| AT2G43010 | AT1G75830 | Repression |
| AT2G43010 | AT1G76100 | Repression |
| AT2G43010 | AT1G76185 | Repression |
| AT2G43010 | AT1G76730 | Repression |
| AT2G43010 | AT1G77490 | Repression |
| AT2G43010 | AT1G77700 | Repression |
| AT2G43010 | AT1G78030 | Repression |
| AT2G43010 | AT1G78290 | Repression |
| AT2G43010 | AT1G78400 | Repression |
| AT2G43010 | AT1G79110 | Repression |
| AT2G43010 | AT1G79360 | Repression |
| AT2G43010 | AT1G79370 | Repression |
| AT2G43010 | AT1G79760 | Repression |
| AT2G43010 | AT1G80180 | Repression |
| AT2G43010 | AT1G80490 | Repression |
| AT2G43010 | AT1G80865 | Repression |
| AT2G43010 | AT2G01420 | Repression |
| AT2G43010 | AT2G01620 | Repression |
| AT2G43010 | AT2G01890 | Repression |
| AT2G43010 | AT2G03530 | Repression |
| AT2G43010 | AT2G03710 | Repression |
| AT2G43010 | AT2G04270 | Repression |
| AT2G43010 | AT2G06166 | Repression |
| AT2G43010 | AT2G14880 | Repression |
| AT2G43010 | AT2G15000 | Repression |
| AT2G43010 | AT2G16280 | Repression |
| AT2G43010 | AT2G16340 | Repression |
| AT2G43010 | AT2G16430 | Repression |
| AT2G43010 | AT2G16835 | Repression |
| AT2G43010 | AT2G18193 | Repression |
| AT2G43010 | AT2G18290 | Repression |
| AT2G43010 | AT2G18560 | Repression |
| AT2G43010 | AT2G18700 | Repression |
| AT2G43010 | AT2G19670 | Repression |
| AT2G43010 | AT2G19802 | Repression |
| AT2G43010 | AT2G19870 | Repression |
| AT2G43010 | AT2G20050 | Repression |
| AT2G43010 | AT2G20570 | Repression |
| AT2G43010 | AT2G20670 | Repression |
| AT2G43010 | AT2G20725 | Repression |
| AT2G43010 | AT2G21210 | Repression |

|           |           |            |
|-----------|-----------|------------|
| AT2G43010 | AT2G21220 | Repression |
| AT2G43010 | AT2G21650 | Repression |
| AT2G43010 | AT2G22330 | Repression |
| AT2G43010 | AT2G22426 | Repression |
| AT2G43010 | AT2G22980 | Repression |
| AT2G43010 | AT2G22990 | Repression |
| AT2G43010 | AT2G23130 | Repression |
| AT2G43010 | AT2G23760 | Repression |
| AT2G43010 | AT2G24280 | Repression |
| AT2G43010 | AT2G24790 | Repression |
| AT2G43010 | AT2G25470 | Repression |
| AT2G43010 | AT2G27660 | Repression |
| AT2G43010 | AT2G27680 | Repression |
| AT2G43010 | AT2G27840 | Repression |
| AT2G43010 | AT2G28190 | Repression |
| AT2G43010 | AT2G28490 | Repression |
| AT2G43010 | AT2G28940 | Repression |
| AT2G43010 | AT2G28950 | Repression |
| AT2G43010 | AT2G29654 | Repression |
| AT2G43010 | AT2G30010 | Repression |
| AT2G43010 | AT2G30520 | Repression |
| AT2G43010 | AT2G31005 | Repression |
| AT2G43010 | AT2G32100 | Repression |
| AT2G43010 | AT2G33180 | Repression |
| AT2G43010 | AT2G33210 | Repression |
| AT2G43010 | AT2G34030 | Repression |
| AT2G43010 | AT2G34185 | Repression |
| AT2G43010 | AT2G34315 | Repression |
| AT2G43010 | AT2G34640 | Repression |
| AT2G43010 | AT2G35260 | Repression |
| AT2G43010 | AT2G36050 | Repression |
| AT2G43010 | AT2G36053 | Repression |
| AT2G43010 | AT2G36190 | Repression |
| AT2G43010 | AT2G37030 | Repression |
| AT2G43010 | AT2G37940 | Repression |
| AT2G43010 | AT2G38170 | Repression |
| AT2G43010 | AT2G38180 | Repression |
| AT2G43010 | AT2G38390 | Repression |
| AT2G43010 | AT2G39200 | Repression |
| AT2G43010 | AT2G39220 | Repression |
| AT2G43010 | AT2G39490 | Repression |
| AT2G43010 | AT2G39700 | Repression |
| AT2G43010 | AT2G40610 | Repression |
| AT2G43010 | AT2G40690 | Repression |
| AT2G43010 | AT2G40700 | Repression |
| AT2G43010 | AT2G41090 | Repression |
| AT2G43010 | AT2G41100 | Repression |
| AT2G43010 | AT2G41870 | Repression |
| AT2G43010 | AT2G41880 | Repression |
| AT2G43010 | AT2G41890 | Repression |
| AT2G43010 | AT2G42600 | Repression |
| AT2G43010 | AT2G42690 | Repression |

|           |           |            |
|-----------|-----------|------------|
| AT2G43010 | AT2G43000 | Repression |
| AT2G43010 | AT2G43140 | Repression |
| AT2G43010 | AT2G43910 | Repression |
| AT2G43010 | AT2G44070 | Repression |
| AT2G43010 | AT2G44670 | Repression |
| AT2G43010 | AT2G44920 | Repression |
| AT2G43010 | AT2G45580 | Repression |
| AT2G43010 | AT2G45660 | Repression |
| AT2G43010 | AT2G46160 | Repression |
| AT2G43010 | AT2G46220 | Repression |
| AT2G43010 | AT2G46340 | Repression |
| AT2G43010 | AT2G46510 | Repression |
| AT2G43010 | AT2G46530 | Repression |
| AT2G43010 | AT2G46600 | Repression |
| AT2G43010 | AT2G46680 | Repression |
| AT2G43010 | AT2G46790 | Repression |
| AT2G43010 | AT2G46820 | Repression |
| AT2G43010 | AT2G46830 | Repression |
| AT2G43010 | AT2G47010 | Repression |
| AT2G43010 | AT2G47340 | Repression |
| AT2G43010 | AT2G47430 | Repression |
| AT2G43010 | AT2G47770 | Repression |
| AT2G43010 | AT2G47940 | Repression |
| AT2G43010 | AT3G01360 | Repression |
| AT2G43010 | AT3G01480 | Repression |
| AT2G43010 | AT3G01490 | Repression |
| AT2G43010 | AT3G01500 | Repression |
| AT2G43010 | AT3G01550 | Repression |
| AT2G43010 | AT3G01860 | Repression |
| AT2G43010 | AT3G02120 | Repression |
| AT2G43010 | AT3G02150 | Repression |
| AT2G43010 | AT3G02830 | Repression |
| AT2G43010 | AT3G04420 | Repression |
| AT2G43010 | AT3G05625 | Repression |
| AT2G43010 | AT3G05650 | Repression |
| AT2G43010 | AT3G06080 | Repression |
| AT2G43010 | AT3G06490 | Repression |
| AT2G43010 | AT3G06750 | Repression |
| AT2G43010 | AT3G06778 | Repression |
| AT2G43010 | AT3G06780 | Repression |
| AT2G43010 | AT3G06880 | Repression |
| AT2G43010 | AT3G07350 | Repression |
| AT2G43010 | AT3G08660 | Repression |
| AT2G43010 | AT3G08940 | Repression |
| AT2G43010 | AT3G10420 | Repression |
| AT2G43010 | AT3G10974 | Repression |
| AT2G43010 | AT3G11670 | Repression |
| AT2G43010 | AT3G12320 | Repression |
| AT2G43010 | AT3G13405 | Repression |
| AT2G43010 | AT3G13686 | Repression |
| AT2G43010 | AT3G14020 | Repression |
| AT2G43010 | AT3G14210 | Repression |



|           |           |            |
|-----------|-----------|------------|
| AT2G43010 | AT3G14550 | Repression |
| AT2G43010 | AT3G14650 | Repression |
| AT2G43010 | AT3G14760 | Repression |
| AT2G43010 | AT3G15030 | Repression |
| AT2G43010 | AT3G15520 | Repression |
| AT2G43010 | AT3G15534 | Repression |
| AT2G43010 | AT3G15570 | Repression |
| AT2G43010 | AT3G15720 | Repression |
| AT2G43010 | AT3G16000 | Repression |
| AT2G43010 | AT3G16010 | Repression |
| AT2G43010 | AT3G16851 | Repression |
| AT2G43010 | AT3G16870 | Repression |
| AT2G43010 | AT3G17130 | Repression |
| AT2G43010 | AT3G17510 | Repression |
| AT2G43010 | AT3G17830 | Repression |
| AT2G43010 | AT3G18540 | Repression |
| AT2G43010 | AT3G19560 | Repression |
| AT2G43010 | AT3G19690 | Repression |
| AT2G43010 | AT3G20810 | Repression |
| AT2G43010 | AT3G21260 | Repression |
| AT2G43010 | AT3G21270 | Repression |
| AT2G43010 | AT3G21550 | Repression |
| AT2G43010 | AT3G21560 | Repression |
| AT2G43010 | AT3G22886 | Repression |
| AT2G43010 | AT3G23060 | Repression |
| AT2G43010 | AT3G23080 | Repression |
| AT2G43010 | AT3G23700 | Repression |
| AT2G43010 | AT3G23890 | Repression |
| AT2G43010 | AT3G24900 | Repression |
| AT2G43010 | AT3G25727 | Repression |
| AT2G43010 | AT3G26932 | Repression |
| AT2G43010 | AT3G27060 | Repression |
| AT2G43010 | AT3G27690 | Repression |
| AT2G43010 | AT3G27785 | Repression |
| AT2G43010 | AT3G27960 | Repression |
| AT2G43010 | AT3G28040 | Repression |
| AT2G43010 | AT3G28650 | Repression |
| AT2G43010 | AT3G29240 | Repression |
| AT2G43010 | AT3G29320 | Repression |
| AT2G43010 | AT3G29580 | Repression |
| AT2G43010 | AT3G29644 | Repression |
| AT2G43010 | AT3G30340 | Repression |
| AT2G43010 | AT3G43280 | Repression |
| AT2G43010 | AT3G43540 | Repression |
| AT2G43010 | AT3G45730 | Repression |
| AT2G43010 | AT3G46540 | Repression |
| AT2G43010 | AT3G46630 | Repression |
| AT2G43010 | AT3G47250 | Repression |
| AT2G43010 | AT3G47620 | Repression |
| AT2G43010 | AT3G47640 | Repression |
| AT2G43010 | AT3G48270 | Repression |
| AT2G43010 | AT3G48700 | Repression |

|           |           |            |
|-----------|-----------|------------|
| AT2G43010 | AT3G50240 | Repression |
| AT2G43010 | AT3G50330 | Repression |
| AT2G43010 | AT3G50337 | Repression |
| AT2G43010 | AT3G50440 | Repression |
| AT2G43010 | AT3G50750 | Repression |
| AT2G43010 | AT3G50790 | Repression |
| AT2G43010 | AT3G51420 | Repression |
| AT2G43010 | AT3G51660 | Repression |
| AT2G43010 | AT3G52840 | Repression |
| AT2G43010 | AT3G52910 | Repression |
| AT2G43010 | AT3G53170 | Repression |
| AT2G43010 | AT3G53250 | Repression |
| AT2G43010 | AT3G53540 | Repression |
| AT2G43010 | AT3G53800 | Repression |
| AT2G43010 | AT3G53820 | Repression |
| AT2G43010 | AT3G54500 | Repression |
| AT2G43010 | AT3G54940 | Repression |
| AT2G43010 | AT3G54990 | Repression |
| AT2G43010 | AT3G55240 | Repression |
| AT2G43010 | AT3G55850 | Repression |
| AT2G43010 | AT3G56080 | Repression |
| AT2G43010 | AT3G56290 | Repression |
| AT2G43010 | AT3G56350 | Repression |
| AT2G43010 | AT3G56360 | Repression |
| AT2G43010 | AT3G57040 | Repression |
| AT2G43010 | AT3G59070 | Repression |
| AT2G43010 | AT3G59340 | Repression |
| AT2G43010 | AT3G59890 | Repression |
| AT2G43010 | AT3G59930 | Repression |
| AT2G43010 | AT3G59940 | Repression |
| AT2G43010 | AT3G59960 | Repression |
| AT2G43010 | AT3G60380 | Repression |
| AT2G43010 | AT3G61198 | Repression |
| AT2G43010 | AT3G61470 | Repression |
| AT2G43010 | AT3G61750 | Repression |
| AT2G43010 | AT3G61827 | Repression |
| AT2G43010 | AT3G61870 | Repression |
| AT2G43010 | AT3G61890 | Repression |
| AT2G43010 | AT3G62610 | Repression |
| AT2G43010 | AT3G63233 | Repression |
| AT2G43010 | AT3G63510 | Repression |
| AT2G43010 | AT4G00150 | Repression |
| AT2G43010 | AT4G01330 | Repression |
| AT2G43010 | AT4G01690 | Repression |
| AT2G43010 | AT4G02300 | Repression |
| AT2G43010 | AT4G02380 | Repression |
| AT2G43010 | AT4G02390 | Repression |
| AT2G43010 | AT4G02530 | Repression |
| AT2G43010 | AT4G02715 | Repression |
| AT2G43010 | AT4G03205 | Repression |
| AT2G43010 | AT4G03280 | Repression |
| AT2G43010 | AT4G04330 | Repression |

|           |           |            |
|-----------|-----------|------------|
| AT2G43010 | AT4G04630 | Repression |
| AT2G43010 | AT4G04690 | Repression |
| AT2G43010 | AT4G05180 | Repression |
| AT2G43010 | AT4G08850 | Repression |
| AT2G43010 | AT4G11010 | Repression |
| AT2G43010 | AT4G11020 | Repression |
| AT2G43010 | AT4G11320 | Repression |
| AT2G43010 | AT4G11330 | Repression |
| AT2G43010 | AT4G11540 | Repression |
| AT2G43010 | AT4G12430 | Repression |
| AT2G43010 | AT4G12730 | Repression |
| AT2G43010 | AT4G13940 | Repression |
| AT2G43010 | AT4G14315 | Repression |
| AT2G43010 | AT4G14480 | Repression |
| AT2G43010 | AT4G14690 | Repression |
| AT2G43010 | AT4G14720 | Repression |
| AT2G43010 | AT4G14815 | Repression |
| AT2G43010 | AT4G15258 | Repression |
| AT2G43010 | AT4G15545 | Repression |
| AT2G43010 | AT4G15560 | Repression |
| AT2G43010 | AT4G15690 | Repression |
| AT2G43010 | AT4G16140 | Repression |
| AT2G43010 | AT4G16370 | Repression |
| AT2G43010 | AT4G16480 | Repression |
| AT2G43010 | AT4G16980 | Repression |
| AT2G43010 | AT4G16990 | Repression |
| AT2G43010 | AT4G17245 | Repression |
| AT2G43010 | AT4G17810 | Repression |
| AT2G43010 | AT4G18240 | Repression |
| AT2G43010 | AT4G18660 | Repression |
| AT2G43010 | AT4G18940 | Repression |
| AT2G43010 | AT4G19130 | Repression |
| AT2G43010 | AT4G19170 | Repression |
| AT2G43010 | AT4G19420 | Repression |
| AT2G43010 | AT4G19830 | Repression |
| AT2G43010 | AT4G20070 | Repression |
| AT2G43010 | AT4G21910 | Repression |
| AT2G43010 | AT4G22360 | Repression |
| AT2G43010 | AT4G22485 | Repression |
| AT2G43010 | AT4G22730 | Repression |
| AT2G43010 | AT4G22800 | Repression |
| AT2G43010 | AT4G23103 | Repression |
| AT2G43010 | AT4G23250 | Repression |
| AT2G43010 | AT4G23260 | Repression |
| AT2G43010 | AT4G23500 | Repression |
| AT2G43010 | AT4G23870 | Repression |
| AT2G43010 | AT4G24660 | Repression |
| AT2G43010 | AT4G24972 | Repression |
| AT2G43010 | AT4G25070 | Repression |
| AT2G43010 | AT4G25080 | Repression |
| AT2G43010 | AT4G25100 | Repression |
| AT2G43010 | AT4G25380 | Repression |

|           |           |            |
|-----------|-----------|------------|
| AT2G43010 | AT4G25630 | Repression |
| AT2G43010 | AT4G25707 | Repression |
| AT2G43010 | AT4G25990 | Repression |
| AT2G43010 | AT4G26200 | Repression |
| AT2G43010 | AT4G27300 | Repression |
| AT2G43010 | AT4G27330 | Repression |
| AT2G43010 | AT4G27340 | Repression |
| AT2G43010 | AT4G27520 | Repression |
| AT2G43010 | AT4G27657 | Repression |
| AT2G43010 | AT4G27710 | Repression |
| AT2G43010 | AT4G27860 | Repression |
| AT2G43010 | AT4G27870 | Repression |
| AT2G43010 | AT4G27950 | Repression |
| AT2G43010 | AT4G27980 | Repression |
| AT2G43010 | AT4G28330 | Repression |
| AT2G43010 | AT4G28660 | Repression |
| AT2G43010 | AT4G28750 | Repression |
| AT2G43010 | AT4G29200 | Repression |
| AT2G43010 | AT4G30490 | Repression |
| AT2G43010 | AT4G31355 | Repression |
| AT2G43010 | AT4G33470 | Repression |
| AT2G43010 | AT4G34220 | Repression |
| AT2G43010 | AT4G34520 | Repression |
| AT2G43010 | AT4G34650 | Repression |
| AT2G43010 | AT4G34710 | Repression |
| AT2G43010 | AT4G35180 | Repression |
| AT2G43010 | AT4G35250 | Repression |
| AT2G43010 | AT4G35760 | Repression |
| AT2G43010 | AT4G36220 | Repression |
| AT2G43010 | AT4G36700 | Repression |
| AT2G43010 | AT4G37080 | Repression |
| AT2G43010 | AT4G37470 | Repression |
| AT2G43010 | AT4G37480 | Repression |
| AT2G43010 | AT4G37550 | Repression |
| AT2G43010 | AT4G37800 | Repression |
| AT2G43010 | AT4G37810 | Repression |
| AT2G43010 | AT4G37850 | Repression |
| AT2G43010 | AT4G38420 | Repression |
| AT2G43010 | AT4G38460 | Repression |
| AT2G43010 | AT4G38690 | Repression |
| AT2G43010 | AT4G38740 | Repression |
| AT2G43010 | AT4G38810 | Repression |
| AT2G43010 | AT4G38840 | Repression |
| AT2G43010 | AT4G39050 | Repression |
| AT2G43010 | AT4G39800 | Repression |
| AT2G43010 | AT5G01240 | Repression |
| AT2G43010 | AT5G01600 | Repression |
| AT2G43010 | AT5G01740 | Repression |
| AT2G43010 | AT5G02760 | Repression |
| AT2G43010 | AT5G03350 | Repression |
| AT2G43010 | AT5G04130 | Repression |
| AT2G43010 | AT5G04140 | Repression |

|           |           |            |
|-----------|-----------|------------|
| AT2G43010 | AT5G04180 | Repression |
| AT2G43010 | AT5G04190 | Repression |
| AT2G43010 | AT5G04530 | Repression |
| AT2G43010 | AT5G05250 | Repression |
| AT2G43010 | AT5G05860 | Repression |
| AT2G43010 | AT5G06530 | Repression |
| AT2G43010 | AT5G06980 | Repression |
| AT2G43010 | AT5G07020 | Repression |
| AT2G43010 | AT5G07190 | Repression |
| AT2G43010 | AT5G07200 | Repression |
| AT2G43010 | AT5G07240 | Repression |
| AT2G43010 | AT5G07990 | Repression |
| AT2G43010 | AT5G08141 | Repression |
| AT2G43010 | AT5G08330 | Repression |
| AT2G43010 | AT5G09462 | Repression |
| AT2G43010 | AT5G11060 | Repression |
| AT2G43010 | AT5G11530 | Repression |
| AT2G43010 | AT5G13140 | Repression |
| AT2G43010 | AT5G13250 | Repression |
| AT2G43010 | AT5G13730 | Repression |
| AT2G43010 | AT5G13760 | Repression |
| AT2G43010 | AT5G14370 | Repression |
| AT2G43010 | AT5G14650 | Repression |
| AT2G43010 | AT5G15160 | Repression |
| AT2G43010 | AT5G15230 | Repression |
| AT2G43010 | AT5G15410 | Repression |
| AT2G43010 | AT5G15420 | Repression |
| AT2G43010 | AT5G16030 | Repression |
| AT2G43010 | AT5G16567 | Repression |
| AT2G43010 | AT5G18570 | Repression |
| AT2G43010 | AT5G18600 | Repression |
| AT2G43010 | AT5G18820 | Repression |
| AT2G43010 | AT5G18850 | Repression |
| AT2G43010 | AT5G19940 | Repression |
| AT2G43010 | AT5G20630 | Repression |
| AT2G43010 | AT5G20635 | Repression |
| AT2G43010 | AT5G21482 | Repression |
| AT2G43010 | AT5G22100 | Repression |
| AT2G43010 | AT5G22640 | Repression |
| AT2G43010 | AT5G22910 | Repression |
| AT2G43010 | AT5G22920 | Repression |
| AT2G43010 | AT5G23360 | Repression |
| AT2G43010 | AT5G24000 | Repression |
| AT2G43010 | AT5G24920 | Repression |
| AT2G43010 | AT5G24930 | Repression |
| AT2G43010 | AT5G26200 | Repression |
| AT2G43010 | AT5G26790 | Repression |
| AT2G43010 | AT5G28050 | Repression |
| AT2G43010 | AT5G28470 | Repression |
| AT2G43010 | AT5G35407 | Repression |
| AT2G43010 | AT5G38510 | Repression |
| AT2G43010 | AT5G38520 | Repression |

|           |           |            |
|-----------|-----------|------------|
| AT2G43010 | AT5G38980 | Repression |
| AT2G43010 | AT5G39210 | Repression |
| AT2G43010 | AT5G41080 | Repression |
| AT2G43010 | AT5G43150 | Repression |
| AT2G43010 | AT5G43810 | Repression |
| AT2G43010 | AT5G43870 | Repression |
| AT2G43010 | AT5G44190 | Repression |
| AT2G43010 | AT5G44572 | Repression |
| AT2G43010 | AT5G45830 | Repression |
| AT2G43010 | AT5G46240 | Repression |
| AT2G43010 | AT5G46690 | Repression |
| AT2G43010 | AT5G47040 | Repression |
| AT2G43010 | AT5G47380 | Repression |
| AT2G43010 | AT5G47500 | Repression |
| AT2G43010 | AT5G47610 | Repression |
| AT2G43010 | AT5G47640 | Repression |
| AT2G43010 | AT5G48270 | Repression |
| AT2G43010 | AT5G48540 | Repression |
| AT2G43010 | AT5G48940 | Repression |
| AT2G43010 | AT5G49170 | Repression |
| AT2G43010 | AT5G50340 | Repression |
| AT2G43010 | AT5G51210 | Repression |
| AT2G43010 | AT5G51460 | Repression |
| AT2G43010 | AT5G52440 | Repression |
| AT2G43010 | AT5G52570 | Repression |
| AT2G43010 | AT5G52890 | Repression |
| AT2G43010 | AT5G52900 | Repression |
| AT2G43010 | AT5G52901 | Repression |
| AT2G43010 | AT5G53460 | Repression |
| AT2G43010 | AT5G53500 | Repression |
| AT2G43010 | AT5G53970 | Repression |
| AT2G43010 | AT5G54160 | Repression |
| AT2G43010 | AT5G54280 | Repression |
| AT2G43010 | AT5G54510 | Repression |
| AT2G43010 | AT5G54700 | Repression |
| AT2G43010 | AT5G54710 | Repression |
| AT2G43010 | AT5G54950 | Repression |
| AT2G43010 | AT5G54970 | Repression |
| AT2G43010 | AT5G55920 | Repression |
| AT2G43010 | AT5G56550 | Repression |
| AT2G43010 | AT5G57010 | Repression |
| AT2G43010 | AT5G58460 | Repression |
| AT2G43010 | AT5G58600 | Repression |
| AT2G43010 | AT5G58770 | Repression |
| AT2G43010 | AT5G58900 | Repression |
| AT2G43010 | AT5G59430 | Repression |
| AT2G43010 | AT5G59540 | Repression |
| AT2G43010 | AT5G59740 | Repression |
| AT2G43010 | AT5G59810 | Repression |
| AT2G43010 | AT5G60850 | Repression |
| AT2G43010 | AT5G60860 | Repression |
| AT2G43010 | AT5G60880 | Repression |

|           |           |            |
|-----------|-----------|------------|
| AT2G43010 | AT5G61270 | Repression |
| AT2G43010 | AT5G61670 | Repression |
| AT2G43010 | AT5G62220 | Repression |
| AT2G43010 | AT5G62350 | Repression |
| AT2G43010 | AT5G62360 | Repression |
| AT2G43010 | AT5G62370 | Repression |
| AT2G43010 | AT5G62880 | Repression |
| AT2G43010 | AT5G63450 | Repression |
| AT2G43010 | AT5G65280 | Repression |
| AT2G43010 | AT5G65380 | Repression |
| AT2G43010 | AT5G65390 | Repression |
| AT2G43010 | AT5G66090 | Repression |
| AT2G43010 | AT5G66340 | Repression |
| AT2G43010 | AT5G66570 | Repression |
| AT2G43010 | AT5G67030 | Repression |
| AT2G43010 | AT5G67050 | Repression |
| AT2G43010 | AT5G67370 | Repression |
| AT2G43010 | AT5G67385 | Repression |
| AT2G43010 | AT5G67480 | Repression |
| AT5G61850 | AT1G02340 | Repression |
| AT5G61850 | AT1G03850 | Repression |
| AT5G61850 | AT1G05770 | Repression |
| AT5G61850 | AT1G05800 | Repression |
| AT5G61850 | AT1G05990 | Repression |
| AT5G61850 | AT1G06990 | Repression |
| AT5G61850 | AT1G07460 | Repression |
| AT5G61850 | AT1G07540 | Repression |
| AT5G61850 | AT1G08990 | Repression |
| AT5G61850 | AT1G09950 | Repression |
| AT5G61850 | AT1G12190 | Repression |
| AT5G61850 | AT1G14930 | Repression |
| AT5G61850 | AT1G17150 | Repression |
| AT5G61850 | AT1G17390 | Repression |
| AT5G61850 | AT1G17545 | Repression |
| AT5G61850 | AT1G17745 | Repression |
| AT5G61850 | AT1G17900 | Repression |
| AT5G61850 | AT1G18200 | Repression |
| AT5G61850 | AT1G18220 | Repression |
| AT5G61850 | AT1G18570 | Repression |
| AT5G61850 | AT1G20290 | Repression |
| AT5G61850 | AT1G21120 | Repression |
| AT5G61850 | AT1G21130 | Repression |
| AT5G61850 | AT1G21390 | Repression |
| AT5G61850 | AT1G23700 | Repression |
| AT5G61850 | AT1G24260 | Repression |
| AT5G61850 | AT1G24600 | Repression |
| AT5G61850 | AT1G24640 | Repression |
| AT5G61850 | AT1G25270 | Repression |
| AT5G61850 | AT1G27730 | Repression |
| AT5G61850 | AT1G27740 | Repression |
| AT5G61850 | AT1G28430 | Repression |
| AT5G61850 | AT1G28630 | Repression |

|           |           |            |
|-----------|-----------|------------|
| AT5G61850 | AT1G29440 | Repression |
| AT5G61850 | AT1G29450 | Repression |
| AT5G61850 | AT1G29460 | Repression |
| AT5G61850 | AT1G30350 | Repression |
| AT5G61850 | AT1G32780 | Repression |
| AT5G61850 | AT1G33600 | Repression |
| AT5G61850 | AT1G35515 | Repression |
| AT5G61850 | AT1G35730 | Repression |
| AT5G61850 | AT1G48095 | Repression |
| AT5G61850 | AT1G49450 | Repression |
| AT5G61850 | AT1G50160 | Repression |
| AT5G61850 | AT1G52560 | Repression |
| AT5G61850 | AT1G52800 | Repression |
| AT5G61850 | AT1G52900 | Repression |
| AT5G61850 | AT1G56010 | Repression |
| AT5G61850 | AT1G56030 | Repression |
| AT5G61850 | AT1G58190 | Repression |
| AT5G61850 | AT1G58210 | Repression |
| AT5G61850 | AT1G59940 | Repression |
| AT5G61850 | AT1G59950 | Repression |
| AT5G61850 | AT1G60020 | Repression |
| AT5G61850 | AT1G61800 | Repression |
| AT5G61850 | AT1G63710 | Repression |
| AT5G61850 | AT1G64820 | Repression |
| AT5G61850 | AT1G66490 | Repression |
| AT5G61850 | AT1G67920 | Repression |
| AT5G61850 | AT1G68380 | Repression |
| AT5G61850 | AT1G68500 | Repression |
| AT5G61850 | AT1G68510 | Repression |
| AT5G61850 | AT1G68880 | Repression |
| AT5G61850 | AT1G69120 | Repression |
| AT5G61850 | AT1G69810 | Repression |
| AT5G61850 | AT1G69870 | Repression |
| AT5G61850 | AT1G72000 | Repression |
| AT5G61850 | AT1G72080 | Repression |
| AT5G61850 | AT1G72200 | Repression |
| AT5G61850 | AT1G76590 | Repression |
| AT5G61850 | AT1G77730 | Repression |
| AT5G61850 | AT1G77780 | Repression |
| AT5G61850 | AT1G78390 | Repression |
| AT5G61850 | AT1G78400 | Repression |
| AT5G61850 | AT1G79620 | Repression |
| AT5G61850 | AT1G80090 | Repression |
| AT5G61850 | AT1G80340 | Repression |
| AT5G61850 | AT1G80820 | Repression |
| AT5G61850 | AT1G80840 | Repression |
| AT5G61850 | AT2G02930 | Repression |
| AT5G61850 | AT2G03540 | Repression |
| AT5G61850 | AT2G03720 | Repression |
| AT5G61850 | AT2G11270 | Repression |
| AT5G61850 | AT2G15070 | Repression |
| AT5G61850 | AT2G17660 | Repression |



|           |           |            |
|-----------|-----------|------------|
| AT5G61850 | AT2G17740 | Repression |
| AT5G61850 | AT2G18200 | Repression |
| AT5G61850 | AT2G18210 | Repression |
| AT5G61850 | AT2G18260 | Repression |
| AT5G61850 | AT2G18540 | Repression |
| AT5G61850 | AT2G18880 | Repression |
| AT5G61850 | AT2G19630 | Repression |
| AT5G61850 | AT2G19840 | Repression |
| AT5G61850 | AT2G21310 | Repression |
| AT5G61850 | AT2G22030 | Repression |
| AT5G61850 | AT2G22290 | Repression |
| AT5G61850 | AT2G22340 | Repression |
| AT5G61850 | AT2G22590 | Repression |
| AT5G61850 | AT2G23430 | Repression |
| AT5G61850 | AT2G25470 | Repression |
| AT5G61850 | AT2G25735 | Repression |
| AT5G61850 | AT2G29940 | Repression |
| AT5G61850 | AT2G30430 | Repression |
| AT5G61850 | AT2G31780 | Repression |
| AT5G61850 | AT2G33350 | Repression |
| AT5G61850 | AT2G36750 | Repression |
| AT5G61850 | AT2G36890 | Repression |
| AT5G61850 | AT2G37580 | Repression |
| AT5G61850 | AT2G39240 | Repression |
| AT5G61850 | AT2G39250 | Repression |
| AT5G61850 | AT2G41260 | Repression |
| AT5G61850 | AT2G41380 | Repression |
| AT5G61850 | AT2G42180 | Repression |
| AT5G61850 | AT2G42440 | Repression |
| AT5G61850 | AT2G42530 | Repression |
| AT5G61850 | AT2G43060 | Repression |
| AT5G61850 | AT2G43390 | Repression |
| AT5G61850 | AT2G44480 | Repression |
| AT5G61850 | AT2G44570 | Repression |
| AT5G61850 | AT2G45130 | Repression |
| AT5G61850 | AT2G46360 | Repression |
| AT5G61850 | AT2G46850 | Repression |
| AT5G61850 | AT2G47560 | Repression |
| AT5G61850 | AT3G01250 | Repression |
| AT5G61850 | AT3G01260 | Repression |
| AT5G61850 | AT3G01500 | Repression |
| AT5G61850 | AT3G03190 | Repression |
| AT5G61850 | AT3G03200 | Repression |
| AT5G61850 | AT3G06630 | Repression |
| AT5G61850 | AT3G08810 | Repression |
| AT5G61850 | AT3G08980 | Repression |
| AT5G61850 | AT3G12160 | Repression |
| AT5G61850 | AT3G12840 | Repression |
| AT5G61850 | AT3G12850 | Repression |
| AT5G61850 | AT3G13950 | Repression |
| AT5G61850 | AT3G14060 | Repression |
| AT5G61850 | AT3G14680 | Repression |

|           |           |            |
|-----------|-----------|------------|
| AT5G61850 | AT3G14710 | Repression |
| AT5G61850 | AT3G14820 | Repression |
| AT5G61850 | AT3G14880 | Repression |
| AT5G61850 | AT3G15500 | Repression |
| AT5G61850 | AT3G16580 | Repression |
| AT5G61850 | AT3G20400 | Repression |
| AT5G61850 | AT3G20710 | Repression |
| AT5G61850 | AT3G22142 | Repression |
| AT5G61850 | AT3G22830 | Repression |
| AT5G61850 | AT3G22930 | Repression |
| AT5G61850 | AT3G23220 | Repression |
| AT5G61850 | AT3G26160 | Repression |
| AT5G61850 | AT3G26220 | Repression |
| AT5G61850 | AT3G26230 | Repression |
| AT5G61850 | AT3G28080 | Repression |
| AT5G61850 | AT3G43110 | Repression |
| AT5G61850 | AT3G43120 | Repression |
| AT5G61850 | AT3G45960 | Repression |
| AT5G61850 | AT3G46130 | Repression |
| AT5G61850 | AT3G48370 | Repression |
| AT5G61850 | AT3G50570 | Repression |
| AT5G61850 | AT3G51590 | Repression |
| AT5G61850 | AT3G51710 | Repression |
| AT5G61850 | AT3G53960 | Repression |
| AT5G61850 | AT3G54340 | Repression |
| AT5G61850 | AT3G57540 | Repression |
| AT5G61850 | AT3G58080 | Repression |
| AT5G61850 | AT3G59440 | Repression |
| AT5G61850 | AT3G60120 | Repression |
| AT5G61850 | AT3G63020 | Repression |
| AT5G61850 | AT4G01490 | Repression |
| AT5G61850 | AT4G03290 | Repression |
| AT5G61850 | AT4G05030 | Repression |
| AT5G61850 | AT4G12960 | Repression |
| AT5G61850 | AT4G13790 | Repression |
| AT5G61850 | AT4G14400 | Repression |
| AT5G61850 | AT4G14530 | Repression |
| AT5G61850 | AT4G15250 | Repression |
| AT5G61850 | AT4G15530 | Repression |
| AT5G61850 | AT4G16590 | Repression |
| AT5G61850 | AT4G16820 | Repression |
| AT5G61850 | AT4G17410 | Repression |
| AT5G61850 | AT4G18280 | Repression |
| AT5G61850 | AT4G18960 | Repression |
| AT5G61850 | AT4G18970 | Repression |
| AT5G61850 | AT4G19530 | Repression |
| AT5G61850 | AT4G21950 | Repression |
| AT5G61850 | AT4G23240 | Repression |
| AT5G61850 | AT4G23520 | Repression |
| AT5G61850 | AT4G24040 | Repression |
| AT5G61850 | AT4G24350 | Repression |
| AT5G61850 | AT4G24980 | Repression |

|           |           |            |
|-----------|-----------|------------|
| AT5G61850 | AT4G25420 | Repression |
| AT5G61850 | AT4G25430 | Repression |
| AT5G61850 | AT4G25530 | Repression |
| AT5G61850 | AT4G25950 | Repression |
| AT5G61850 | AT4G26950 | Repression |
| AT5G61850 | AT4G27980 | Repression |
| AT5G61850 | AT4G28085 | Repression |
| AT5G61850 | AT4G28090 | Repression |
| AT5G61850 | AT4G28110 | Repression |
| AT5G61850 | AT4G28560 | Repression |
| AT5G61850 | AT4G29340 | Repression |
| AT5G61850 | AT4G30070 | Repression |
| AT5G61850 | AT4G30120 | Repression |
| AT5G61850 | AT4G34760 | Repression |
| AT5G61850 | AT4G35010 | Repression |
| AT5G61850 | AT4G35700 | Repression |
| AT5G61850 | AT4G36210 | Repression |
| AT5G61850 | AT4G36770 | Repression |
| AT5G61850 | AT4G37780 | Repression |
| AT5G61850 | AT5G01550 | Repression |
| AT5G61850 | AT5G01830 | Repression |
| AT5G61850 | AT5G04200 | Repression |
| AT5G61850 | AT5G04680 | Repression |
| AT5G61850 | AT5G05290 | Repression |
| AT5G61850 | AT5G05440 | Repression |
| AT5G61850 | AT5G07430 | Repression |
| AT5G61850 | AT5G07680 | Repression |
| AT5G61850 | AT5G08460 | Repression |
| AT5G61850 | AT5G09480 | Repression |
| AT5G61850 | AT5G10770 | Repression |
| AT5G61850 | AT5G10880 | Repression |
| AT5G61850 | AT5G11920 | Repression |
| AT5G61850 | AT5G13170 | Repression |
| AT5G61850 | AT5G14180 | Repression |
| AT5G61850 | AT5G14300 | Repression |
| AT5G61850 | AT5G14750 | Repression |
| AT5G61850 | AT5G15150 | Repression |
| AT5G61850 | AT5G19040 | Repression |
| AT5G61850 | AT5G19710 | Repression |
| AT5G61850 | AT5G21120 | Repression |
| AT5G61850 | AT5G22300 | Repression |
| AT5G61850 | AT5G22990 | Repression |
| AT5G61850 | AT5G23000 | Repression |
| AT5G61850 | AT5G23010 | Repression |
| AT5G61850 | AT5G24910 | Repression |
| AT5G61850 | AT5G25120 | Repression |
| AT5G61850 | AT5G28510 | Repression |
| AT5G61850 | AT5G37690 | Repression |
| AT5G61850 | AT5G38100 | Repression |
| AT5G61850 | AT5G41040 | Repression |
| AT5G61850 | AT5G41380 | Repression |
| AT5G61850 | AT5G43840 | Repression |

|           |           |            |
|-----------|-----------|------------|
| AT5G61850 | AT5G44120 | Repression |
| AT5G61850 | AT5G44130 | Repression |
| AT5G61850 | AT5G44990 | Repression |
| AT5G61850 | AT5G45180 | Repression |
| AT5G61850 | AT5G46770 | Repression |
| AT5G61850 | AT5G49290 | Repression |
| AT5G61850 | AT5G49770 | Repression |
| AT5G61850 | AT5G50880 | Repression |
| AT5G61850 | AT5G51650 | Repression |
| AT5G61850 | AT5G51900 | Repression |
| AT5G61850 | AT5G51990 | Repression |
| AT5G61850 | AT5G52020 | Repression |
| AT5G61850 | AT5G52050 | Repression |
| AT5G61850 | AT5G53190 | Repression |
| AT5G61850 | AT5G53710 | Repression |
| AT5G61850 | AT5G54020 | Repression |
| AT5G61850 | AT5G54030 | Repression |
| AT5G61850 | AT5G54620 | Repression |
| AT5G61850 | AT5G56620 | Repression |
| AT5G61850 | AT5G57550 | Repression |
| AT5G61850 | AT5G57570 | Repression |
| AT5G61850 | AT5G57670 | Repression |
| AT5G61850 | AT5G58080 | Repression |
| AT5G61850 | AT5G59060 | Repression |
| AT5G61850 | AT5G59070 | Repression |
| AT5G61850 | AT5G60260 | Repression |
| AT5G61850 | AT5G60270 | Repression |
| AT5G61850 | AT5G61280 | Repression |
| AT5G61850 | AT5G63130 | Repression |
| AT5G61850 | AT5G64120 | Repression |
| AT5G61850 | AT5G64905 | Repression |
| AT5G61850 | AT5G65600 | Repression |
| AT5G61850 | AT5G66650 | Repression |
| AT5G61850 | AT5G67060 | Repression |
| AT2G46830 | AT2G40080 | Repression |
| AT1G01060 | AT2G40080 | Repression |
| AT1G69120 | AT2G42200 | Repression |
| AT1G69120 | AT5G03840 | Repression |
| AT1G69120 | AT1G65480 | Repression |
| AT4G36920 | AT2G45660 | Repression |
| AT2G44745 | AT2G46770 | Repression |
| AT1G71930 | AT5G13180 | Repression |
| AT4G34610 | AT5G60690 | Repression |
| AT1G62990 | AT5G60690 | Repression |
| AT2G46830 | AT5G24470 | Repression |
| AT2G43000 | AT1G15550 | Repression |
| AT2G43000 | AT3G50660 | Repression |
| AT2G43000 | AT2G20180 | Repression |
| AT2G20180 | AT2G43000 | Repression |
| AT5G08330 | AT2G46830 | Repression |
| AT1G62300 | AT3G23430 | Repression |
| AT5G16560 | AT1G01120 | Repression |

|           |           |            |
|-----------|-----------|------------|
| AT5G16560 | AT1G01140 | Repression |
| AT5G16560 | AT1G01490 | Repression |
| AT5G16560 | AT1G21590 | Repression |
| AT5G16560 | AT1G23090 | Repression |
| AT5G16560 | AT1G25550 | Repression |
| AT5G16560 | AT1G25560 | Repression |
| AT5G16560 | AT1G28660 | Repression |
| AT5G16560 | AT1G33240 | Repression |
| AT5G16560 | AT1G35350 | Repression |
| AT5G16560 | AT1G51805 | Repression |
| AT5G16560 | AT1G52290 | Repression |
| AT5G16560 | AT1G61660 | Repression |
| AT5G16560 | AT1G66840 | Repression |
| AT5G16560 | AT1G69760 | Repression |
| AT5G16560 | AT1G71880 | Repression |
| AT5G16560 | AT1G72450 | Repression |
| AT5G16560 | AT1G76990 | Repression |
| AT5G16560 | AT2G01420 | Repression |
| AT5G16560 | AT2G02950 | Repression |
| AT5G16560 | AT2G16400 | Repression |
| AT5G16560 | AT2G17820 | Repression |
| AT5G16560 | AT2G21210 | Repression |
| AT5G16560 | AT2G27050 | Repression |
| AT5G16560 | AT2G30520 | Repression |
| AT5G16560 | AT2G30990 | Repression |
| AT5G16560 | AT2G31070 | Repression |
| AT5G16560 | AT2G38310 | Repression |
| AT5G16560 | AT2G39360 | Repression |
| AT5G16560 | AT2G40270 | Repression |
| AT5G16560 | AT2G41940 | Repression |
| AT5G16560 | AT2G42690 | Repression |
| AT5G16560 | AT2G43820 | Repression |
| AT5G16560 | AT3G05120 | Repression |
| AT5G16560 | AT3G06750 | Repression |
| AT5G16560 | AT3G13110 | Repression |
| AT5G16560 | AT3G15570 | Repression |
| AT5G16560 | AT3G19850 | Repression |
| AT5G16560 | AT3G19930 | Repression |
| AT5G16560 | AT3G23820 | Repression |
| AT5G16560 | AT3G49220 | Repression |
| AT5G16560 | AT3G55560 | Repression |
| AT5G16560 | AT3G58120 | Repression |
| AT5G16560 | AT3G61460 | Repression |
| AT5G16560 | AT4G16980 | Repression |
| AT5G16560 | AT4G16990 | Repression |
| AT5G16560 | AT4G18010 | Repression |
| AT5G16560 | AT4G18340 | Repression |
| AT5G16560 | AT4G22190 | Repression |
| AT5G16560 | AT4G24060 | Repression |
| AT5G16560 | AT4G24660 | Repression |
| AT5G16560 | AT4G25620 | Repression |
| AT5G16560 | AT4G25990 | Repression |

|           |           |            |
|-----------|-----------|------------|
| AT5G16560 | AT4G27300 | Repression |
| AT5G16560 | AT4G33050 | Repression |
| AT5G16560 | AT4G34220 | Repression |
| AT5G16560 | AT4G37590 | Repression |
| AT5G16560 | AT4G38840 | Repression |
| AT5G16560 | AT5G03150 | Repression |
| AT5G16560 | AT5G09850 | Repression |
| AT5G16560 | AT5G11090 | Repression |
| AT5G16560 | AT5G17860 | Repression |
| AT5G16560 | AT5G28300 | Repression |
| AT5G16560 | AT5G40450 | Repression |
| AT5G16560 | AT5G47370 | Repression |
| AT5G16560 | AT5G47560 | Repression |
| AT5G16560 | AT5G52900 | Repression |
| AT5G16560 | AT5G54250 | Repression |
| AT5G16560 | AT5G59780 | Repression |
| AT5G16560 | AT5G61590 | Repression |
| AT5G16560 | AT5G63410 | Repression |
| AT5G16560 | AT5G67440 | Repression |
| AT4G04450 | AT3G23430 | Repression |
| AT3G22170 | AT1G02400 | Repression |
| AT3G22170 | AT1G02400 | Repression |
